# Supplementary material for: Comparative transcriptome analysis of differentially expressed genes related to the physiological changes of yellow-green leaf mutant of maize
Source: PeerJ. 2021 Feb 16;9:e10567. doi: 10.7717/peerj.10567 (PMC7894110; doi:10.7717/peerj.10567)
Supplement: Supplemental Information 1 [file peerj-09-10567-s001.xlsx]

## Sheet: Sheet1
Table S1 Primers for qRT-PCR analysis
Gene ID	Forward primer	Reverse primer
Zm00001d000279	GACTGGGTATCCATGCCAGG	CAGGTGCATTTCCCCAAGGA
Zm00001d019479	GCCGGGGCTGACTTCATTA	GCGGAGCTAGGAAGTCTCAC
Zm00001d024037	TTGGCATCCTAGCTCGTCTA	CTGCGGCGAGAAGTGGAG
Zm00001d033446	GTTACACCAACACTGCCTGC	CAACGAAGCACGCGAAATGA
Zm00001d009373	CAATTGCAGCACGGATTGGA	AGACACATCAAAGTACTGGCTAA
Zm00001d013013	AGGGGTGGTGAACCTTCATTC	TACATCGCCAAACGTGGACA
Zm00001d002970	GTACGGGGCCTCCACATCC	GCCAGAAGGCGAACCTGGA
Zm00001d017418	CCTTCAGAGACGAGGCTCAC	GGCCTATTGGGAGGTTCCAG
Zm00001d015623	GGCTGGAACTCTACCCTGGA	CGGACCCCAATCCTGAGTTC
ZmGAPDH (M18976)	CCCTTCATCACCACGGACTAC	AACCTTCTTGGCACCACCCT
