# Supplementary material for: Comparative transcriptome analysis of differentially expressed genes related to the physiological changes of yellow-green leaf mutant of maize
Source: PeerJ. 2021 Feb 16;9:e10567. doi: 10.7717/peerj.10567 (PMC7894110; doi:10.7717/peerj.10567)
Supplement: Supplemental Information 2 [file peerj-09-10567-s002.xlsx]

## Sheet: Table S2
Gene_id	readcount_YML	readcount_NGL	log2FoldChange	pval	padj	Gene name	Gene description
GRMZM5G815453	0.527342	38.4002	-6.1862	1.1e-05	0.00078265	-	Ribulose bisphosphate carboxylase large chain [Source:UniProtKB/TrEMBL;Acc:A0A096TUU6]
Novel00001	538.518	0	Inf	8.17e-38	2.81e-34	--	TPA: hypothetical protein ZEAMMB73_048726 [Zea mays]
Novel00020	32.5205	0.979637	5.053	0.0001401	0.0067615	--	activator-like transposable element
Novel00022	58.3565	182.391	-1.6441	0.00095707	0.031198	-//-
Novel00029	34.9529	0	Inf	8.99e-06	0.00065433	--	PREDICTED: serine/arginine repetitive matrix protein 3-like [Zea mays]
Novel00038	0	49.7432	#NAME?	4.39e-08	5.53e-06	--	hypothetical protein SORBIDRAFT_02g038780 [Sorghum bicolor]>gi|241924366|gb|EER97510.1| hypothetical protein SORBIDRAFT_02g038780 [Sorghum bicolor]
Novel00058	0	25.2207	#NAME?	0.00038543	0.015228	--	hypothetical protein [Zea mays]
Novel00070	166.984	520.556	-1.6403	0.00028801	0.011992	--	PREDICTED: uncharacterized protein LOC103638633 [Zea mays]
Novel00087	104.012	10.6728	3.2847	1.94e-06	0.00017431	--	hypothetical protein [Zea mays]
Novel00092	24.9818	130.688	-2.3872	3.97e-05	0.0023693	-//-
Novel00118	0	304.298	#NAME?	2.62e-28	3.52e-25	-//-
Novel00120	178.932	496.437	-1.4722	0.00032181	0.013186	--	hypothetical protein ZEAMMB73_196745 [Zea mays]
Novel00122	162.721	0	Inf	5.22e-08	6.41e-06	--	hypothetical protein OsI_04736 [Oryza sativa Indica Group]
Novel00129	22.7499	0	Inf	0.00026797	0.011278	--	PREDICTED: flagellar attachment zone protein 1-like isoform X2 [Zea mays]>gi|670424308|ref|XP_008652875.1| PREDICTED: flagellar attachment zone protein 1-like isoform X2 [Zea mays]>gi|414886067|tpg|DAA62081.1| TPA: hypothetical protein ZEAMMB73_395108 [Zea mays]
Novel00155	25.951	0	Inf	8.35e-05	0.0044308	-//-
Novel00159	442.011	1373.02	-1.6352	2.23e-05	0.0014105	--	PREDICTED: uncharacterized protein LOC100382585 isoform X1 [Zea mays]
Novel00173	61.8065	0	Inf	1.35e-09	2.29e-07	--	PREDICTED: uncharacterized protein LOC100381392 isoform X1 [Zea mays]>gi|670428630|ref|XP_008655156.1| PREDICTED: uncharacterized protein LOC100381392 isoform X1 [Zea mays]>gi|219886587|gb|ACL53668.1| unknown [Zea mays]>gi|223975301|gb|ACN31838.1| unknown [Zea mays]
Novel00216	97.3238	0	Inf	1.22e-13	3.13e-11	--	hypothetical protein [Zea mays]
Novel00253	5.47392	190.419	-5.1205	1.83e-05	0.0012046	--	uncharacterized protein LOC100383491 [Zea mays]>gi|224030367|gb|ACN34259.1| unknown [Zea mays]>gi|413916774|gb|AFW56706.1| hypothetical protein ZEAMMB73_515737 [Zea mays]
Novel00254	0	93.1567	#NAME?	5.27e-13	1.31e-10	--	unknown [Zea mays]>gi|224035383|gb|ACN36767.1| unknown [Zea mays]
Novel00257	88.53	19.319	2.1961	0.00082883	0.02796	--	hypothetical protein [Zea mays]
Novel00258	0	78.0299	#NAME?	2.39e-11	5.14e-09	--	uncharacterized protein LOC100276265 precursor [Zea mays]>gi|195622624|gb|ACG33142.1| hypothetical protein [Zea mays]
Novel00263	0	261.9	#NAME?	4.88e-26	5.39e-23	--	hypothetical protein [Zea mays]>gi|195640072|gb|ACG39504.1| hypothetical protein [Zea mays]>gi|413916933|gb|AFW56865.1| hypothetical protein ZEAMMB73_530407 [Zea mays]>gi|413916934|gb|AFW56866.1| hypothetical protein ZEAMMB73_530407 [Zea mays]
Novel00264	117.482	32.681	1.8459	0.0013357	0.040311	-//-
Novel00265	0	30.7098	#NAME?	1.91e-05	0.0012515	--	RecName: Full=Putative AC transposase; AltName: Full=ORFA [Zea mays]>gi|22113|emb|CAA29005.1| ORFa [Zea mays]>gi|81238235|gb|ABB59981.1| Ac transposase [Immobile Ac/T-DNA vector pKU352NA]>gi|81238241|gb|ABB59986.1| Ac transposase [Immobile Ac/T-DNA vector pNU400]
Novel00274	0	48.0934	#NAME?	9.01e-08	1.04e-05	--	unknown [Zea mays]>gi|413917361|gb|AFW57293.1| hypothetical protein ZEAMMB73_996267 [Zea mays]
Novel00296	5.15086	42.751	-3.0531	0.0012812	0.039089	--	PREDICTED: mitochondrial uncoupling protein 3 [Zea mays]
Novel00308	699.906	31.154	4.4897	1.34e-20	6.89e-18	--	unknown [Zea mays]
Novel00311	731.004	88.0522	3.0534	2.86e-12	6.65e-10	--	uncharacterized protein LOC100276802 [Zea mays]>gi|195634879|gb|ACG36908.1| hypothetical protein [Zea mays]
Novel00325	0	407.616	#NAME?	6e-33	1.55e-29	--	H0321H01.8 [Oryza sativa Indica Group]
Novel00326	0	323.046	#NAME?	2.76e-29	4.37e-26	--	uncharacterized protein LOC100384738 precursor [Zea mays]>gi|238006826|gb|ACR34448.1| unknown [Zea mays]
Novel00339	0	46.4317	#NAME?	9.61e-05	0.0050236	--	uncharacterized protein LOC100384746 [Zea mays]>gi|238006874|gb|ACR34472.1| unknown [Zea mays]
Novel00346	71.0868	0	Inf	9.33e-11	1.87e-08	--	hypothetical protein [Zea mays]
Novel00356	300.294	89.9006	1.74	0.00010209	0.0052548	--	PREDICTED: uncharacterized protein LOC100191254 isoform X1 [Zea mays]
Novel00369	915.317	168.973	2.4375	3.92e-09	6.04e-07	-//-
Novel00373	23.6041	0	Inf	0.00021002	0.0093479	-//-
Novel00375	18.858	337.768	-4.1628	4.31e-15	1.29e-12	--	PREDICTED: oligouridylate-binding protein 1-like isoform X2 [Zea mays]
Novel00377	184.35	40.4823	2.1871	4.04e-05	0.002395	--	60S ribosomal protein L37 [Zea mays]>gi|194708386|gb|ACF88277.1| unknown [Zea mays]>gi|195622444|gb|ACG33052.1| csAtPR5 [Zea mays]>gi|413920041|gb|AFW59973.1| csAtPR5 [Zea mays]
Novel00379	0	75.2257	#NAME?	3.99e-11	8.29e-09	-//-
Novel00390	0	18.2363	#NAME?	0.0013159	0.03987	--	PREDICTED: peptide chain release factor 1, mitochondrial-like isoform X2 [Zea mays]>gi|670378994|ref|XP_008670395.1| PREDICTED: peptide chain release factor 1, mitochondrial-like isoform X2 [Zea mays]>gi|670409801|ref|XP_008646090.1| PREDICTED: peptide chain release factor 1, mitochondrial-like isoform X2 [Zea mays]
Novel00474	104.632	0	Inf	2.54e-14	6.89e-12	-//-
Novel00495	0	21.2664	#NAME?	0.00045971	0.017764	--	PREDICTED: uncharacterized protein LOC103645881 [Zea mays]
Novel00504	752.253	0	Inf	4.62e-30	8.41e-27	--	PREDICTED: BTB/POZ domain-containing protein At1g30440-like [Zea mays]
Novel00549	3.52797	35.5048	-3.3311	0.0015679	0.045246	--	TPA: hypothetical protein ZEAMMB73_126016 [Zea mays]
Novel00556	85.3213	382.526	-2.1646	6.96e-06	0.00052382	--	TPA: hypothetical protein ZEAMMB73_862570 [Zea mays]
Novel00563	579.487	97.2893	2.5744	4.19e-09	6.32e-07	--	hypothetical protein [Zea mays]>gi|670374098|ref|XP_008668409.1| PREDICTED: hypothetical protein isoform X1 [Zea mays]>gi|670374100|ref|XP_008668410.1| PREDICTED: hypothetical protein isoform X1 [Zea mays]>gi|670374102|ref|XP_008668411.1| PREDICTED: hypothetical protein isoform X1 [Zea mays]>gi|670374104|ref|XP_008668412.1| PREDICTED: hypothetical protein isoform X1 [Zea mays]>gi|670374106|ref|XP…
Novel00569	55.8832	199.647	-1.837	0.00019876	0.0089555	--	hypothetical protein [Zea mays]>gi|238006880|gb|ACR34475.1| unknown [Zea mays]>gi|238008988|gb|ACR35529.1| unknown [Zea mays]>gi|414885075|tpg|DAA61089.1| TPA: hypothetical protein ZEAMMB73_199429 [Zea mays]
Novel00587	1.54117	39.0269	-4.6624	9.64e-05	0.0050312	--	uncharacterized protein LOC100276265 precursor [Zea mays]>gi|195622624|gb|ACG33142.1| hypothetical protein [Zea mays]
Novel00636	11.1521	65.9093	-2.5632	0.00072685	0.025443	--	PREDICTED: uncharacterized protein LOC101771722 [Setaria italica]
Novel00654	105.316	0	Inf	1.97e-14	5.44e-12	--	PREDICTED: uncharacterized protein LOC103651470 [Zea mays]
Novel00672	1272.62	0.535432	11.215	3.76e-51	5.81e-47	--	hypothetical protein ZEAMMB73_641897 [Zea mays]
Novel00676	708.941	271.919	1.3825	0.00047896	0.018292	--	TPA: hypothetical protein ZEAMMB73_276562 [Zea mays]
Novel00713	240.82	4.08907	5.88	1.31e-09	2.24e-07	--	hypothetical protein ZEAMMB73_066505 [Zea mays]
Novel00755	17.8442	0	Inf	0.0015781	0.045286	--	unknown [Zea mays]>gi|413938273|gb|AFW72824.1| hypothetical protein ZEAMMB73_936591 [Zea mays]
Novel00789	4.09617	133.044	-5.0215	3.58e-09	5.57e-07	--	PREDICTED: uncharacterized protein LOC100303785 isoform X4 [Zea mays]
Novel00793	0.527342	36.8732	-6.1277	1.61e-05	0.0010758	--	putative pol protein [Zea mays]
Novel00807	38.6034	2.58593	3.9	0.00024782	0.010589	--	hypothetical protein [Zea mays]
Novel00818	0	35.596	#NAME?	3.66e-06	0.00030334	--	hypothetical protein [Zea mays]
Novel00820	0	27.8621	#NAME?	4.99e-05	0.0028752	--	PREDICTED: phospholipase D beta 1-like isoform X2 [Zea mays]
Novel00836	0	30.7336	#NAME?	2.19e-05	0.001397	--	hypothetical protein [Zea mays]
Novel00848	0	96.8928	#NAME?	2.13e-13	5.39e-11	--	PREDICTED: serine/threonine-protein kinase sepA-like [Zea mays]
Novel00894	0.486487	219.763	-8.8193	2.92e-22	2.07e-19	--	uncharacterized protein LOC100384847 [Zea mays]>gi|238007350|gb|ACR34710.1| unknown [Zea mays]
Novel00901	0	26.9856	#NAME?	7.29e-05	0.0039697	--	hypothetical protein ZEAMMB73_349855, partial [Zea mays]
Novel00906	80.293	8.45182	3.2479	1.63e-05	0.0010897	--	hypothetical protein ZEAMMB73_922994 [Zea mays]
Novel00915	0	21.6432	#NAME?	0.0004573	0.017739	--	PREDICTED: vegetative cell wall protein gp1-like [Zea mays]>gi|670406521|ref|XP_008644815.1| PREDICTED: vegetative cell wall protein gp1-like [Zea mays]
Novel00925	0.486487	116.438	-7.9029	2.61e-14	7.03e-12	--	uncharacterized protein LOC100501052 [Zea mays]>gi|224035433|gb|ACN36792.1| unknown [Zea mays]
Novel00928	265.285	71.5135	1.8913	5.31e-05	0.0030281	--	PREDICTED: uncharacterized protein LOC103639754 [Zea mays]
Novel00931	0	201.722	#NAME?	2.94e-22	2.07e-19	--	PREDICTED: uncharacterized protein LOC103642686 [Zea mays]
Novel00958	0	64.4974	#NAME?	8.94e-10	1.55e-07	-//-
Novel00961	0	49.2197	#NAME?	5.43e-08	6.64e-06	--	PREDICTED: uncharacterized protein LOC103655596 [Zea mays]
Novel00962	0	26.7119	#NAME?	7.69e-05	0.0041414	--	PREDICTED: uncharacterized protein LOC103636511 [Zea mays]>gi|413951978|gb|AFW84627.1| hypothetical protein ZEAMMB73_429738 [Zea mays]
Novel00966	0	264.252	#NAME?	5.15e-26	5.49e-23	--	uncharacterized protein LOC100279008 [Zea mays]>gi|195657941|gb|ACG48438.1| hypothetical protein [Zea mays]>gi|413923762|gb|AFW63694.1| hypothetical protein ZEAMMB73_443730 [Zea mays]
Novel00969	0	20.7429	#NAME?	0.00058937	0.021757	--	hypothetical protein [Zea mays]
Novel00972	11.1521	70.0777	-2.6516	0.00035789	0.014286	--	hypothetical protein ZEAMMB73_043716 [Zea mays]
Novel00977	511.416	1221	-1.2555	0.0015587	0.045106	--	unknown [Zea mays]
Novel01001	1.01383	26.7239	-4.7202	0.00097721	0.031754	--	putative clathrin heavy chain family protein [Zea mays]
Novel01018	1.58203	480.025	-8.2452	2.6e-32	6.19e-29	--	hypothetical protein ZEAMMB73_502375 [Zea mays]
Novel01020	0.527342	42.271	-6.3248	2.7e-06	0.00023272	--	uncharacterized protein LOC100382273 [Zea mays]>gi|223948659|gb|ACN28413.1| unknown [Zea mays]
Novel01021	0	39.356	#NAME?	1.24e-06	0.00011699	--	hypothetical protein ZEAMMB73_796524, partial [Zea mays]
Novel01031	648.357	239.222	1.4384	0.00022169	0.0097552	-//-
Novel01032	28.6286	127.019	-2.1495	0.00019206	0.0087117	--	hypothetical protein [Zea mays]>gi|219886013|gb|ACL53381.1| unknown [Zea mays]>gi|413934553|gb|AFW69104.1| hypothetical protein ZEAMMB73_099748 [Zea mays]>gi|413934554|gb|AFW69105.1| hypothetical protein ZEAMMB73_099748 [Zea mays]>gi|413934555|gb|AFW69106.1| hypothetical protein ZEAMMB73_099748 [Zea mays]
Novel01044	0	36.6669	#NAME?	2.63e-06	0.00022796	-//-
Novel01045	0	260.234	#NAME?	2.52e-19	1.16e-16	--	DnaJ homolog subfamily B member 13 [Aegilops tauschii]
Novel01046	90.8883	0	Inf	1.14e-06	0.00010864	--	unknown [Zea mays]>gi|413935688|gb|AFW70239.1| hypothetical protein ZEAMMB73_295233 [Zea mays]
Novel01047	470.426	0	Inf	0.0014578	0.042991	-//-
Novel01060	18.4123	0	Inf	0.0012985	0.039381	--	hypothetical protein [Zea mays]
Novel01064	0	135.063	#NAME?	4.64e-17	1.73e-14	--	prpol [Zea mays]
Novel01071	0	71.7752	#NAME?	1.1e-10	2.19e-08	--	uncharacterized protein LOC100278178 [Zea mays]>gi|195649925|gb|ACG44430.1| hypothetical protein [Zea mays]
Novel01074	0	112.579	#NAME?	6.32e-15	1.86e-12	--	PREDICTED: uncharacterized protein LOC103626908 isoform X2 [Zea mays]
Novel01075	174.906	0	Inf	1.85e-20	9.38e-18	-//-
Novel01076	215.232	0.979637	7.7794	9.94e-08	1.14e-05	--	hypothetical protein [Zea mays]>gi|238013646|gb|ACR37858.1| unknown [Zea mays]>gi|414587918|tpg|DAA38489.1| TPA: hypothetical protein ZEAMMB73_966274 [Zea mays]
Novel01079	0	65.5206	#NAME?	5.35e-10	9.84e-08	--	hypothetical protein ZEAMMB73_922458 [Zea mays]
Novel01082	0	230.944	#NAME?	4.99e-24	4.83e-21	--	TPA: hypothetical protein ZEAMMB73_219032 [Zea mays]
Novel01087	0	65.3739	#NAME?	6.53e-10	1.17e-07	--	PREDICTED: uncharacterized protein LOC103627159 isoform X1 [Zea mays]
Novel01089	0	61.3403	#NAME?	1.74e-09	2.89e-07	--	PREDICTED: uncharacterized protein LOC103641609 [Zea mays]
Novel01090	0	799.751	#NAME?	3.65e-39	1.41e-35	--	putative gag-pol polyprotein [Oryza sativa Japonica Group]
Novel01092	0	29.3533	#NAME?	0.00083893	0.028217	-//-
Novel01097	0	26.3828	#NAME?	0.0015353	0.044597	-//-
Novel01101	60.139	1.77682	5.0809	6.17e-07	6.14e-05	--	hypothetical protein ZEAMMB73_439428 [Zea mays]
Novel01103	45.6632	169.247	-1.89	0.00028181	0.011781	--	PREDICTED: uncharacterized protein LOC103628297 [Zea mays]
Novel01106	118.124	0	Inf	1.03e-15	3.28e-13	--	hypothetical protein ZEAMMB73_282856 [Zea mays]
Novel01112	21.0861	0	Inf	0.00047086	0.01809	-//-
Novel01131	0	43.4689	#NAME?	3.79e-07	3.91e-05	--	hypothetical protein ZEAMMB73_663969 [Zea mays]
Novel01138	11.3155	92.5974	-3.0327	1.11e-05	0.00078436	--	hypothetical protein ZEAMMB73_936473 [Zea mays]
Novel01139	2.10937	252.258	-6.9019	1.18e-08	1.67e-06	--	unnamed protein product [Zea mays]
Novel01143	0	277.884	#NAME?	1.24e-06	0.00011699	--	uncharacterized protein LOC100384007 [Zea mays]>gi|224033369|gb|ACN35760.1| unknown [Zea mays]
Novel01148	0	51.0085	#NAME?	3.33e-08	4.39e-06	--	uncharacterized protein LOC100381887 [Zea mays]>gi|223946259|gb|ACN27213.1| unknown [Zea mays]
Novel01155	0.486487	160.074	-8.3621	5.97e-05	0.0033696	--	uncharacterized protein LOC100502284 [Zea mays]>gi|238013896|gb|ACR37983.1| unknown [Zea mays]>gi|413935286|gb|AFW69837.1| hypothetical protein ZEAMMB73_073505 [Zea mays]
Novel01158	1.01383	204.336	-7.655	4.38e-20	2.12e-17	--	uncharacterized protein LOC100381497 [Zea mays]>gi|223944059|gb|ACN26113.1| unknown [Zea mays]
Novel01160	54.8656	0	Inf	8.8e-09	1.27e-06	--	hypothetical protein SORBIDRAFT_04g003733 [Sorghum bicolor]>gi|241933141|gb|EES06286.1| hypothetical protein SORBIDRAFT_04g003733, partial [Sorghum bicolor]
Novel01179	0	67.4244	#NAME?	3.78e-10	7e-08	--	hypothetical protein [Zea mays]
Novel01184	65.0818	3.64487	4.1583	1.06e-05	0.00075921	--	PREDICTED: uncharacterized protein LOC103632336 [Zea mays]
Novel01188	1.05468	162.469	-7.2672	2.78e-17	1.06e-14	--	hypothetical protein ZEAMMB73_429534 [Zea mays]
Novel01201	0.527342	160.192	-8.2468	6.05e-18	2.4e-15	--	PREDICTED: serine/threonine-protein kinase sepA-like [Zea mays]
Novel01202	119.71	0	Inf	7.77e-16	2.53e-13	--	PREDICTED: uncharacterized protein LOC103630271 isoform X1 [Zea mays]
Novel01203	0	358.864	#NAME?	7.75e-31	1.6e-27	--	PREDICTED: uncharacterized protein LOC103626059 [Zea mays]
Novel01204	0	179.555	#NAME?	1.13e-20	5.91e-18	--	TPA: hypothetical protein ZEAMMB73_576010 [Zea mays]
Novel01209	0	31.8045	#NAME?	1.56e-05	0.0010584	--	hypothetical protein ZEAMMB73_429534 [Zea mays]
Novel01215	22.6682	0	Inf	0.00027221	0.01141	-//-
Novel01296	5024.58	2092	1.2641	0.00043027	0.016785	--	PREDICTED: translation initiation factor IF-2, chloroplastic [Zea mays]>gi|670417504|ref|XP_008649568.1| PREDICTED: translation initiation factor IF-2, chloroplastic [Zea mays]
Novel01309	22.1408	0.444205	5.6393	0.0012817	0.039089	--	unknown [Zea mays]>gi|413935230|gb|AFW69781.1| hypothetical protein ZEAMMB73_390293 [Zea mays]
Novel01317	2.02766	30.7336	-3.9219	0.0013427	0.040483	--	Cinful1 polyprotein [Zea mays]
Novel01367	172.321	0	Inf	1.73e-12	4.16e-10	-//-
Novel01406	150.088	445.242	-1.5688	0.0014025	0.041679	--	unknown [Zea mays]
Novel01446	0.486487	44.8015	-6.525	1.6e-06	0.0001454	--	hypothetical protein ZEAMMB73_131266 [Zea mays]
Novel01460	30.6562	0	Inf	1.73e-05	0.0011463	--	PREDICTED: uncharacterized protein LOC103639797 [Zea mays]
Novel01461	60.5029	0	Inf	1.75e-09	2.89e-07	--	hypothetical protein ZEAMMB73_189095, partial [Zea mays]
Novel01463	0	189.308	#NAME?	2.59e-21	1.54e-18	--	uncharacterized protein LOC100384746 [Zea mays]>gi|238006874|gb|ACR34472.1| unknown [Zea mays]
Novel01464	2.06851	91.8002	-5.4718	5.56e-10	1.01e-07	--	hypothetical protein [Zea mays]>gi|194703822|gb|ACF85995.1| unknown [Zea mays]>gi|195612586|gb|ACG28123.1| hypothetical protein [Zea mays]>gi|195647078|gb|ACG43007.1| hypothetical protein [Zea mays]>gi|413945103|gb|AFW77752.1| hypothetical protein ZEAMMB73_051523 [Zea mays]
Novel01469	15.1666	73.2348	-2.2716	0.0016642	0.047016	--	putative retrotransposon protein [Zea mays]
Novel01525	138.441	442.903	-1.6777	0.00047347	0.01815	--	hypothetical protein [Zea mays]>gi|194697052|gb|ACF82610.1| unknown [Zea mays]>gi|195613536|gb|ACG28598.1| hypothetical protein [Zea mays]>gi|414885433|tpg|DAA61447.1| TPA: hypothetical protein ZEAMMB73_780824 [Zea mays]
Novel01537	0	477.543	#NAME?	1.28e-35	3.96e-32	--	TPA: hypothetical protein ZEAMMB73_436056, partial [Zea mays]
Novel01548	249.562	1602.03	-2.6824	2e-11	4.33e-09	--	TPA: hypothetical protein ZEAMMB73_100782, partial [Zea mays]
Novel01552	59.6563	212.708	-1.8341	0.00021878	0.0096549	--	hypothetical protein [Zea mays]
Novel01559	58.7242	0	Inf	3.22e-09	5.08e-07	--	hypothetical protein [Zea mays]
Novel01583	150.566	0	Inf	1.42e-18	6.08e-16	--	E3 ubiquitin-protein ligase UBR4 [Aegilops tauschii]
Novel01617	0	35.1638	#NAME?	4.52e-06	0.00035877	--	hypothetical protein [Zea mays]
Novel01622	31.2244	750.881	-4.5878	1.08e-21	6.95e-19	--	PREDICTED: uncharacterized protein LOC100274443 isoform X1 [Zea mays]
Novel01642	23.5224	0	Inf	0.00021329	0.0094396	-//-
Novel01679	3.16405	683.405	-7.7548	5.31e-30	9.12e-27	--	PREDICTED: uncharacterized protein LOC100383780 isoform X1 [Zea mays]
Novel01710	316.426	793.263	-1.3259	0.00074985	0.026034	--	hypothetical protein ZEAMMB73_682406 [Zea mays]
Novel01753	31.1427	141.706	-2.1859	0.00012277	0.0060863	--	uncharacterized protein LOC100193075 [Zea mays]>gi|194692310|gb|ACF80239.1| unknown [Zea mays]>gi|413954368|gb|AFW87017.1| hypothetical protein ZEAMMB73_728707 [Zea mays]>gi|413954369|gb|AFW87018.1| hypothetical protein ZEAMMB73_728707 [Zea mays]
Novel01761	7.665	51.8414	-2.7577	0.001188	0.037347	--	uncharacterized protein LOC100275386 [Zea mays]>gi|195611772|gb|ACG27716.1| hypothetical protein [Zea mays]
Novel01791	193.392	45.4401	2.0895	3.44e-05	0.0020805	-//-
Novel01812	46.7549	218.189	-2.2224	0.0017247	0.048197	--	PREDICTED: uncharacterized protein LOC103639847 [Zea mays]
Novel01815	0	212.236	#NAME?	5.89e-23	4.79e-20	--	hypothetical protein ZEAMMB73_288927 [Zea mays]
Novel01849	1044.24	420.804	1.3112	0.00054431	0.020262	--	hypothetical protein [Zea mays]
Novel01854	86.2572	1.77682	5.6013	1.43e-09	2.41e-07	--	hypothetical protein [Zea mays]>gi|223943243|gb|ACN25705.1| unknown [Zea mays]>gi|413944333|gb|AFW76982.1| hypothetical protein ZEAMMB73_344359 [Zea mays]
Novel01879	49.2282	0.535432	6.5226	3.18e-07	3.35e-05	--	PREDICTED: protein transport protein Sec61 subunit beta-like [Zea mays]>gi|414881468|tpg|DAA58599.1| TPA: hypothetical protein ZEAMMB73_842470 [Zea mays]
Novel01880	619.315	28.9014	4.4215	4.07e-08	5.25e-06	--	PREDICTED: LOW QUALITY PROTEIN: uncharacterized protein LOC100821162 [Brachypodium distachyon]
Novel01881	109.494	8.29323	3.7228	5.66e-08	6.87e-06	--	putative senescence-associated protein [Pisum sativum]
Novel01885	0	53.8365	#NAME?	0.00047132	0.01809	--	uncharacterized protein LOC100277585 [Zea mays]>gi|195644054|gb|ACG41495.1| hypothetical protein [Zea mays]
Zm00001d000195	51.8725	234.796	-2.1784	1.08e-05	0.00076823	-	Protein DETOXIFICATION [Source:UniProtKB/TrEMBL;Acc:B4FQR2]
Zm00001d000196	449.349	110.552	2.0231	2.44e-06	0.00021282	-	Protein DETOXIFICATION [Source:UniProtKB/TrEMBL;Acc:A0A1D6DR43]
Zm00001d000204	611.804	1760.73	-1.525	5.9e-05	0.0033444	-	Zm00001d000204
Zm00001d000279	12.8976	3462.3	-8.0685	1.75e-07	1.94e-05	-	Ribulose bisphosphate carboxylase large chain [Source:UniProtKB/TrEMBL;Acc:A0A096TUU6]
Zm00001d000298	2930.09	598.759	2.2909	3.67e-09	5.67e-07	-	BRASSINOSTEROID INSENSITIVE 1-associated receptor kinase 1 [Source:UniProtKB/TrEMBL;Acc:K7UAG3]
Zm00001d000399	10504.2	4210.35	1.319	0.00025042	0.010685	-	Zm00001d000399
Zm00001d001800	149.037	473.814	-1.6687	6.64e-05	0.0036897	-	Zm00001d001800
Zm00001d001820	328.879	1241.92	-1.9169	7.16e-07	7.01e-05	-	Zm00001d001820
Zm00001d001838	0	17.9864	#NAME?	0.0015999	0.045785	-	Zm00001d001838
Zm00001d001960	37.7122	2.14173	4.1382	0.00016613	0.007763	-	Zm00001d001960
Zm00001d002055	106.006	9.88759	3.4224	5.38e-07	5.44e-05	-	Zm00001d002055
Zm00001d002256	356.846	1005.64	-1.4947	0.00013442	0.0065384	-	Zm00001d002256
Zm00001d002263	36.3344	1.51507	4.5839	0.00011843	0.0058994	-	Zm00001d002263
Zm00001d002342	433.725	106.305	2.0286	0.00010067	0.0052077	-	Zm00001d002342
Zm00001d002358	12168.5	5615.3	1.1157	0.0017305	0.048272	-	Zm00001d002358
Zm00001d002381	6.73288	298.534	-5.4705	0.00029725	0.012326	-	Zm00001d002381
Zm00001d002458	4.01446	479.724	-6.9009	9.97e-29	1.4e-25	-	Zm00001d002458
Zm00001d002483	58.8838	0	Inf	2.93e-09	4.68e-07	-	Zm00001d002483
Zm00001d002490	2640.96	956.697	1.4649	6.46e-05	0.0035997	-	Plastid-specific 30S ribosomal protein 2 [Source:UniProtKB/TrEMBL;Acc:B6SUJ3]
Zm00001d002678	366.471	64.8307	2.4989	2.61e-08	3.49e-06	-	Zm00001d002678
Zm00001d002753	61.5205	7.03991	3.1274	0.00011276	0.0056647	-	Zm00001d002753
Zm00001d002833	0.486487	21.4488	-5.4624	0.0016932	0.047575	-	Zm00001d002833
Zm00001d002837	7.17852	71.9773	-3.3258	0.0014022	0.041679	-	Zm00001d002837
Zm00001d002937	698.599	0.88841	9.619	9.19e-40	4.06e-36	-	Zm00001d002937
Zm00001d002970	35.3244	203.221	-2.5243	0.00062657	0.022723	-	Glycosyltransferase [Source:UniProtKB/TrEMBL;Acc:B4FCG5]
Zm00001d003086	115.427	648.614	-2.4904	9.41e-09	1.34e-06	-	Zm00001d003086
Zm00001d003174	89.6959	19.6047	2.1938	0.00073254	0.025562	-	Zm00001d003174
Zm00001d003212	1248.87	406.518	1.6192	2.34e-05	0.0014684	-	Zm00001d003212
Zm00001d003272	24.6996	127.872	-2.3721	0.0010778	0.034444	-	Zm00001d003272
Zm00001d003356	859.291	159.423	2.4303	0.0001838	0.0083988	-	Zm00001d003356
Zm00001d003411	2013.59	609.465	1.7242	4.17e-06	0.00033784	-	Zm00001d003411
Zm00001d003522	98.8574	483.698	-2.2907	6.26e-05	0.0035131	-	Glutamate decarboxylase [Source:UniProtKB/TrEMBL;Acc:A0A1D6E9M9]
Zm00001d003524	175.459	31.3126	2.4863	0.00020371	0.0091065	-	Aldose reductase [Source:UniProtKB/TrEMBL;Acc:B4FQR3]
Zm00001d003618	1246.23	477.17	1.385	0.00030503	0.012598	-	Zm00001d003618
Zm00001d003690	73.9573	259.909	-1.8132	0.00015288	0.0072422	-	Zm00001d003690
Zm00001d003757	57.6619	347.14	-2.5898	4.19e-08	5.35e-06	-	Lipid binding protein [Source:UniProtKB/TrEMBL;Acc:B4G0B0]
Zm00001d003760	6.44689	60.1901	-3.2229	0.00012463	0.0061543	-	Zm00001d003760
Zm00001d003817	4626.7	10426.2	-1.1722	0.0010698	0.034223	-	Zm00001d003817
Zm00001d003913	468.857	171.309	1.4525	0.00052492	0.0197	-	Zm00001d003913
Zm00001d004109	1.01383	59.9045	-5.8848	8.6e-08	1.01e-05	-	Zm00001d004109
Zm00001d004168	0	189.431	#NAME?	2.1e-21	1.28e-18	-	Zm00001d004168
Zm00001d004330	64.1572	230.921	-1.8477	0.00013986	0.0067602	-	Zm00001d004330
Zm00001d004366	1278.13	342.353	1.9005	0.0010593	0.033959	-	Zm00001d004366
Zm00001d004524	354.161	106.975	1.7271	9.02e-05	0.004753	-	Zm00001d004524
Zm00001d004531	1.05468	951.401	-9.8171	1.01e-44	7.83e-41	-	Zm00001d004531
Zm00001d004753	28.6732	200.139	-2.8032	1.58e-07	1.77e-05	-	Dirigent protein [Source:UniProtKB/TrEMBL;Acc:B6TQI8]
Zm00001d004758	39.0158	210.959	-2.4348	1.75e-06	0.00015823	-	Dirigent protein [Source:UniProtKB/TrEMBL;Acc:B4G233]
Zm00001d004978	771.245	260.686	1.5649	7.68e-05	0.0041414	-	Zm00001d004978
Zm00001d005030	562.111	109.033	2.3661	5.92e-08	7.16e-06	-	Zm00001d005030
Zm00001d005315	9449.72	3471.43	1.4447	8.46e-05	0.0044742	-	Zm00001d005315
Zm00001d005430	314.024	0	Inf	6.51e-14	1.72e-11	-	Zm00001d005430
Zm00001d005624	20.5217	95.3897	-2.2167	0.0005073	0.01918	-	Zm00001d005624
Zm00001d005630	24.6996	238.785	-3.2732	5.13e-08	6.32e-06	-	Zm00001d005630
Zm00001d005695	1596.09	3767.87	-1.2392	0.00080586	0.027492	-	Zm00001d005695
Zm00001d005742	36.3753	289.699	-2.9935	2.81e-09	4.51e-07	-	Zm00001d005742
Zm00001d005859	22.6273	134.769	-2.5744	1.58e-05	0.0010637	-	Zm00001d005859
Zm00001d005879	380.936	106.439	1.8395	0.0005308	0.019855	-	Zm00001d005879
Zm00001d006069	373.631	16.5745	4.4946	1.98e-12	4.68e-10	-	Zm00001d006069
Zm00001d006103	626.294	127.773	2.2933	2.21e-05	0.001408	-	Zm00001d006103
Zm00001d006126	423.39	161.914	1.3868	0.00088977	0.029565	-	Zm00001d006126
Zm00001d006256	647.496	253.817	1.3511	0.00079574	0.027321	-	Zm00001d006256
Zm00001d006596	826.051	343.404	1.2663	0.0013249	0.040102	-	Elongation factor 1-alpha [Source:UniProtKB/TrEMBL;Acc:A0A1D6EY66]
Zm00001d006678	6135.3	2396.1	1.3564	0.00015864	0.0074581	-	Putative geranylgeranyl pyrophosphate synthase 1 [Source:UniProtKB/TrEMBL;Acc:C5G5X3]
Zm00001d006697	407.56	1810.27	-2.1511	2.05e-08	2.79e-06	-	Zm00001d006697
Zm00001d006738	1173.62	418.916	1.4862	0.00019691	0.0088928	-	Zm00001d006738
Zm00001d006835	427.807	1082.09	-1.3388	0.00078556	0.027031	-	Nuclear transcription factor Y subunit A-3 [Source:UniProtKB/TrEMBL;Acc:B4FHR0]
Zm00001d006883	734.027	192.826	1.9285	2.72e-06	0.00023397	-	Zm00001d006883
Zm00001d007015	452.718	133.627	1.7604	0.00037321	0.014859	-	Zm00001d007015
Zm00001d007092	5895.18	2358.09	1.3219	0.00023518	0.01019	-	Elongation factor Ts, mitochondrial [Source:UniProtKB/TrEMBL;Acc:A0A1D6F3N9]
Zm00001d007157	92.0542	294.319	-1.6768	0.00022526	0.0098493	-	Zm00001d007157
Zm00001d007340	56.0837	3.56557	3.9754	1.38e-05	0.00095411	-	Zm00001d007340
Zm00001d007391	12.0842	68.3444	-2.4997	0.00063163	0.022853	-	Zm00001d007391
Zm00001d007486	339.343	95.2704	1.8326	7.55e-05	0.0040985	-	Glycosyltransferase [Source:UniProtKB/TrEMBL;Acc:B4F9H1]
Zm00001d007644	41.4853	0	Inf	5.3e-07	5.4e-05	-	Zm00001d007644
Zm00001d007655	0.527342	88.314	-7.3878	1.5e-11	3.31e-09	-	Zm00001d007655
Zm00001d007687	3858.8	1608.11	1.2628	0.00055398	0.020571	-	Zm00001d007687
Zm00001d007725	29.7687	150.483	-2.3377	0.00032666	0.013314	-	Zm00001d007725
Zm00001d007753	5119.15	1861.15	1.4597	0.00071885	0.025299	-	Zm00001d007753
Zm00001d007869	588.392	241.867	1.2826	0.0013673	0.040987	-	Zm00001d007869
Zm00001d007890	358.966	74.2896	2.2726	1.1e-06	0.00010541	-	Zm00001d007890
Zm00001d008190	3.60969	46.0984	-3.6748	0.00014326	0.0068671	-	Zm00001d008190
Zm00001d008203	1031.38	443.775	1.2167	0.0014004	0.041679	-	Zm00001d008203
Zm00001d008209	4048.08	1528.5	1.4051	0.00012318	0.0060971	-	Peptidyl-prolyl cis-trans isomerase [Source:UniProtKB/TrEMBL;Acc:A0A1D6FAW5]
Zm00001d008345	833.449	287.462	1.5357	0.00012888	0.0063284	-	Importin subunit alpha [Source:UniProtKB/TrEMBL;Acc:A0A1D6FC42]
Zm00001d008370	220.372	3.47434	5.9871	3.49e-18	1.44e-15	-	Putative geranylgeranyl pyrophosphate synthase 3 [Source:UniProtKB/TrEMBL;Acc:C5G5X5]
Zm00001d008427	354.636	70.0223	2.3405	2.94e-07	3.12e-05	-	Zm00001d008427
Zm00001d008440	565.638	204.669	1.4666	0.0014812	0.043351	-	Putative peptidyl-prolyl cis-trans isomerase family protein [Source:UniProtKB/TrEMBL;Acc:K7V9L0]
Zm00001d008477	291.444	47.645	2.6128	2.04e-07	2.25e-05	-	Zm00001d008477
Zm00001d008570	460.3	177.168	1.3775	0.00081222	0.027641	-	Zm00001d008570
Zm00001d008595	139.095	434.784	-1.6442	0.00012638	0.0062254	-	Pirin-like protein [Source:UniProtKB/TrEMBL;Acc:C0P2Q1]
Zm00001d008620	2503.6	7833.58	-1.6457	8.11e-06	0.00059731	-	Metallothionein-like protein type 2 [Source:UniProtKB/TrEMBL;Acc:B4FT00]
Zm00001d008623	28.4281	0.979637	4.8589	0.00049591	0.018846	-	Very-long-chain (3R)-3-hydroxyacyl-CoA dehydratase [Source:UniProtKB/TrEMBL;Acc:A0A1D6FEB4]
Zm00001d008632	880.706	300.047	1.5535	6.87e-05	0.0038019	-	Putative leucine-rich repeat receptor-like protein kinase family protein [Source:UniProtKB/TrEMBL;Acc:K7VQ86]
Zm00001d008700	4385.71	698.195	2.6511	4.1e-09	6.21e-07	-	Tryptophan aminotransferase [Source:UniProtKB/TrEMBL;Acc:F2FB37]
Zm00001d008702	1701.43	6892.11	-2.0182	6.44e-08	7.7e-06	-	Zm00001d008702
Zm00001d008756	1736.8	170.041	3.3525	2.48e-16	8.72e-14	-	Zm00001d008756
Zm00001d008817	64.2389	259.35	-2.0134	2.27e-05	0.0014275	-	Zm00001d008817
Zm00001d008853	24.4507	0	Inf	0.00014065	0.006777	-	Zm00001d008853
Zm00001d008974	183.002	608.255	-1.7328	0.00053792	0.020073	-	Carnitine/acylcarnitine carrier-like protein [Source:UniProtKB/TrEMBL;Acc:B4FWV8]
Zm00001d009084	10036.3	4532.27	1.1469	0.0015945	0.045672	-	Embryonic abundant protein-like protein [Source:UniProtKB/TrEMBL;Acc:C0HDZ4]
Zm00001d009106	720.472	292.162	1.3022	0.00092905	0.030477	-	Putative RING zinc finger domain superfamily protein [Source:UniProtKB/TrEMBL;Acc:K7V045]
Zm00001d009261	30.2961	0	Inf	4.35e-05	0.0025545	-	Zm00001d009261
Zm00001d009373	1.05468	46.852	-5.4732	3.35e-06	0.00028341	-	Peroxidase [Source:UniProtKB/TrEMBL;Acc:K7VCN5]
Zm00001d009432	28.5098	0.444205	6.0041	0.00017722	0.0081459	-	Zm00001d009432
Zm00001d009473	115.748	20.7548	2.4795	0.0017045	0.047805	-	Zm00001d009473
Zm00001d009619	483.5	82.1702	2.5568	2.15e-08	2.91e-06	-	Zm00001d009619
Zm00001d009686	12.3294	85.4186	-2.7924	0.0013671	0.040987	-	Zm00001d009686
Zm00001d009705	426.001	41.3826	3.3638	3.12e-12	7.21e-10	-	Zm00001d009705
Zm00001d009740	629.15	168.933	1.897	9.28e-06	0.00067413	-	Zm00001d009740
Zm00001d009876	0.527342	41.4065	-6.295	4.01e-06	0.00032815	-	Zm00001d009876
Zm00001d009932	24.1276	119.694	-2.3106	0.00021253	0.0094266	-	Plasma membrane associated protein [Source:UniProtKB/TrEMBL;Acc:B6UGF3]
Zm00001d009936	216.889	67.4918	1.6842	0.00057694	0.021323	-	Basic endochitinase A [Source:UniProtKB/TrEMBL;Acc:B6TR38]
Zm00001d009939	1275.25	534.865	1.2535	0.00098852	0.032088	-	Putative WRKY DNA-binding domain superfamily protein [Source:UniProtKB/TrEMBL;Acc:C0P838]
Zm00001d010159	638.003	1786.17	-1.4852	7.28e-05	0.0039697	-	Actin1 isoform 1 [Source:UniProtKB/TrEMBL;Acc:B4FPG2]
Zm00001d010231	191.465	706.659	-1.8839	4.12e-06	0.00033479	-	Amino acid carrier [Source:UniProtKB/TrEMBL;Acc:K7VV86]
Zm00001d010259	529.062	116.553	2.1825	1.28e-06	0.00012037	-	Zm00001d010259
Zm00001d010321	597.773	2041.87	-1.7722	0.00021058	0.0093598	-	Zm00001d010321
Zm00001d010373	553.468	203.047	1.4467	0.0017276	0.048234	-	Stem 28 kDa glycoprotein [Source:UniProtKB/TrEMBL;Acc:B6T3P0]
Zm00001d010375	143.15	36.4051	1.9753	0.00037583	0.014906	-	ATP-dependent 6-phosphofructokinase [Source:UniProtKB/TrEMBL;Acc:C0PGA5]
Zm00001d010428	82.3615	229.389	-1.4778	0.0016076	0.045962	-	Zm00001d010428
Zm00001d010440	13.0164	208.171	-3.9994	1.12e-11	2.5e-09	-	Bidirectional sugar transporter SWEET [Source:UniProtKB/TrEMBL;Acc:C4J9H4]
Zm00001d010499	51.1779	292.391	-2.5143	1.62e-07	1.8e-05	-	Zm00001d010499
Zm00001d010634	42.5846	141.865	-1.7361	0.0012705	0.03898	-	Zm00001d010634
Zm00001d011006	34.0208	142.186	-2.0633	0.0017698	0.049108	-	Zm00001d011006
Zm00001d011069	3955.37	1630.27	1.2787	0.000356	0.014247	-	NAD-dependent epimerase/dehydratase [Source:UniProtKB/TrEMBL;Acc:B4FH62]
Zm00001d011315	35.8888	0	Inf	3.16e-06	0.000268	-	Zm00001d011315
Zm00001d011328	0	35.6318	#NAME?	4.44e-06	0.00035356	-	GTP-binding nuclear protein [Source:UniProtKB/TrEMBL;Acc:A0A1D6FYZ5]
Zm00001d011373	909.866	2430.51	-1.4175	0.00050699	0.01918	-	Zm00001d011373
Zm00001d011459	225.724	604.863	-1.4221	0.00037482	0.014887	-	Zm00001d011459
Zm00001d011477	653.088	1663.4	-1.3488	0.00031924	0.013133	-	Triacylglycerol lipase [Source:UniProtKB/TrEMBL;Acc:B4G1U6]
Zm00001d011515	103.076	3.47434	4.8908	1.38e-06	0.00012807	-	MYB-related transcription factor [Source:UniProtKB/TrEMBL;Acc:B6SZZ3]
Zm00001d011596	8883.33	3277.98	1.4383	7.99e-05	0.0042888	-	Zm00001d011596
Zm00001d011607	73.9649	5.43361	3.7669	2.78e-06	0.00023832	-	Zm00001d011607
Zm00001d011789	2253.65	7599.39	-1.7536	2.24e-06	0.00019819	-	Zm00001d011789
Zm00001d011840	53.2427	323.43	-2.6028	5.6e-07	5.62e-05	-	Zm00001d011840
Zm00001d011886	786.832	309.802	1.3447	0.001093	0.034893	-	Zm00001d011886
Zm00001d012128	139.905	384.854	-1.4599	0.000678	0.024108	-	Zm00001d012128
Zm00001d012141	5218.12	2107.76	1.3078	0.00035134	0.014115	-	Zm00001d012141
Zm00001d012159	55.6418	198.894	-1.8378	0.0017851	0.049394	-	Beta-glucosidase [Source:UniProtKB/TrEMBL;Acc:K7W2F0]
Zm00001d012297	34.9158	2.40348	3.8607	0.00066299	0.023656	-	Zm00001d012297
Zm00001d012301	221.869	47.2724	2.2306	1.03e-05	0.00074061	-	G10-like protein [Source:UniProtKB/TrEMBL;Acc:B6T8X1]
Zm00001d012304	2310.15	737.6	1.6471	3.34e-05	0.0020248	-	Zm00001d012304
Zm00001d012322	312.891	17.931	4.1251	9.64e-06	0.00069542	-	Cytochrome P450 CYP81A1 [Source:UniProtKB/TrEMBL;Acc:B6SYA2]
Zm00001d012323	342.4	4.5452	6.2352	2.44e-23	2.16e-20	-	Zm00001d012323
Zm00001d012333	5145.03	702.378	2.8729	6.27e-05	0.0035149	-	Zm00001d012333
Zm00001d012335	407.047	131.259	1.6328	0.00016473	0.0077093	CISZOG2	Glycosyltransferase [Source:UniProtKB/TrEMBL;Acc:K7V7B4]
Zm00001d012378	5393.22	1385.51	1.9607	2.22e-07	2.43e-05	-	Zm00001d012378
Zm00001d012413	35.9259	263.344	-2.8739	4.91e-05	0.0028386	-	Zm00001d012413
Zm00001d012517	177.138	54.927	1.6893	0.0010041	0.032456	-	Zm00001d012517
Zm00001d012576	179.938	517.196	-1.5232	0.00023284	0.010117	-	Zm00001d012576
Zm00001d012627	95.9461	395.899	-2.0448	3.54e-06	0.00029757	-	Zm00001d012627
Zm00001d012632	490.122	2332.17	-2.2505	4.1e-09	6.21e-07	-	Adhesive/proline-rich protein [Source:UniProtKB/TrEMBL;Acc:B6SQU3]
Zm00001d012707	298.073	871.306	-1.5475	0.0014708	0.043167	-	Zm00001d012707
Zm00001d012859	0	34.1048	#NAME?	6.73e-06	0.0005103	-	Zm00001d012859
Zm00001d012897	12.1251	200.611	-4.0483	4.68e-09	6.96e-07	-	Zm00001d012897
Zm00001d012924	160.794	474.671	-1.5617	0.00018783	0.0085474	-	Zm00001d012924
Zm00001d012929	192.59	500.384	-1.3775	0.0008455	0.028337	-	Zm00001d012929
Zm00001d012953	3.93275	79.9772	-4.346	2.32e-07	2.51e-05	-	Zm00001d012953
Zm00001d012972	195.038	1424.87	-2.869	4.37e-07	4.47e-05	-	Chalcone-flavonone isomerase family protein [Source:UniProtKB/TrEMBL;Acc:C4JC73]
Zm00001d013013	192.612	1322.54	-2.7795	1.54e-11	3.39e-09	-	Mg-protoporphyrin IX chelatase [Source:UniProtKB/TrEMBL;Acc:A0A1D6GEW7]
Zm00001d013033	841.134	2297.38	-1.4496	0.0001006	0.0052077	-	Zm00001d013033
Zm00001d013035	212.789	563.295	-1.4045	0.00054222	0.020209	-	Methyltransferase [Source:UniProtKB/TrEMBL;Acc:B4FZ18]
Zm00001d013052	57.6324	176.128	-1.6117	0.0012825	0.039089	-	Zm00001d013052
Zm00001d013114	74.6148	12.7353	2.5506	0.0003478	0.014064	-	Zm00001d013114
Zm00001d013126	140.629	421.751	-1.5845	0.00023456	0.010177	-	Zm00001d013126
Zm00001d013151	53.4061	4.97748	3.4235	0.00017183	0.0079576	-	Zm00001d013151
Zm00001d013153	404.417	152.649	1.4056	0.0011202	0.035541	-	Zm00001d013153
Zm00001d013208	1294.67	408.58	1.6639	1.4e-05	0.00096425	-	Zm00001d013208
Zm00001d013221	837.437	359.059	1.2218	0.0016798	0.047327	-	Zm00001d013221
Zm00001d013231	46.6361	7.03991	2.7278	0.0017208	0.048131	-	Zm00001d013231
Zm00001d013276	94.2861	265.707	-1.4947	0.0011605	0.036594	-	Zm00001d013276
Zm00001d013329	232.716	57.2393	2.0235	0.00027055	0.011372	-	Zm00001d013329
Zm00001d013419	153.649	31.0866	2.3053	2.63e-05	0.0016357	-	Zm00001d013419
Zm00001d013445	235.279	930.523	-1.9837	6.21e-07	6.15e-05	-	Zm00001d013445
Zm00001d013489	345.701	62.7957	2.4608	2.45e-07	2.65e-05	-	Zm00001d013489
Zm00001d013500	4.13703	39.5623	-3.2575	0.0016407	0.046692	-	Zm00001d013500
Zm00001d013503	0	70.5773	#NAME?	1.25e-10	2.44e-08	-	Zm00001d013503
Zm00001d013506	115.532	1495.64	-3.6944	5.3e-18	2.16e-15	-	Zm00001d013506
Zm00001d013511	0.486487	346.189	-9.4749	7.18e-29	1.06e-25	-	Zm00001d013511
Zm00001d013529	285.131	72.5724	1.9741	2.52e-05	0.0015748	-	Zm00001d013529
Zm00001d013550	493.256	151.225	1.7056	7.16e-05	0.0039297	-	Zm00001d013550
Zm00001d013554	0	25.0263	#NAME?	0.00014163	0.0068034	-	Zm00001d013554
Zm00001d013557	0	383.731	#NAME?	2.92e-16	1e-13	-	Zm00001d013557
Zm00001d013573	111.852	352.118	-1.6545	0.00015683	0.0073843	-	Zm00001d013573
Zm00001d013595	29.8096	105.844	-1.8281	0.0017583	0.048914	-	Zm00001d013595
Zm00001d013606	1.50032	354.985	-7.8863	1.57e-27	1.87e-24	-	Zm00001d013606
Zm00001d013619	1877.41	101.465	4.2097	7.59e-22	5e-19	-	Zm00001d013619
Zm00001d013625	6.04212	126.909	-4.3926	5.95e-10	1.07e-07	-	Zm00001d013625
Zm00001d013644	1148.91	342.13	1.7476	1.35e-05	0.00094379	-	Zm00001d013644
Zm00001d013648	12.9346	72.0131	-2.477	0.00062485	0.022714	-	Zm00001d013648
Zm00001d013652	242.453	633.273	-1.3851	0.00068583	0.024331	-	Zm00001d013652
Zm00001d013655	46.9668	365.185	-2.9589	0.00024427	0.010481	-	Zm00001d013655
Zm00001d013672	25.2232	179.579	-2.8318	3.36e-07	3.51e-05	-	Zm00001d013672
Zm00001d013949	10.8699	171.658	-3.9811	1.38e-06	0.00012807	-	Zm00001d013949
Zm00001d014134	532.382	46.7489	3.5095	3.7e-08	4.81e-06	-	Zm00001d014134
Zm00001d014149	59.4482	280.929	-2.2405	0.00094033	0.030717	-	Zm00001d014149
Zm00001d014193	113.5	29.9245	1.9233	0.00090595	0.030006	-	Zm00001d014193
Zm00001d014204	1.45946	44.7103	-4.9371	1.64e-05	0.0010919	-	Oxidoreductase [Source:UniProtKB/TrEMBL;Acc:B6THA4]
Zm00001d014207	259.303	3.55364	6.1892	7.2e-20	3.38e-17	-	Zm00001d014207
Zm00001d014250	177.338	55.621	1.6728	0.0012294	0.038221	-	Zm00001d014250
Zm00001d014261	0	371.377	#NAME?	1.6e-31	3.54e-28	-	Zm00001d014261
Zm00001d014271	245.789	1778.96	-2.8555	1.07e-12	2.58e-10	-	Zm00001d014271
Zm00001d014278	750.545	222.409	1.7547	1.56e-05	0.0010584	-	Ras-related protein Rab11D [Source:UniProtKB/TrEMBL;Acc:B6TG03]
Zm00001d014282	806.147	207.488	1.958	0.00029329	0.012179	-	Zm00001d014282
Zm00001d014292	6.97424	595.571	-6.4161	2.83e-29	4.37e-26	-	Zm00001d014292
Zm00001d014376	66.7493	11.9381	2.4832	0.00072706	0.025443	-	Zm00001d014376
Zm00001d014559	743.992	1932.78	-1.3773	0.00042328	0.016535	-	Zm00001d014559
Zm00001d014568	96.1466	269.547	-1.4872	0.0012973	0.039381	-	Zm00001d014568
Zm00001d014580	62.8166	389.058	-2.6308	1.21e-08	1.71e-06	-	Zm00001d014580
Zm00001d014628	85.9674	17.0742	2.332	0.00064227	0.023076	-	Zm00001d014628
Zm00001d014648	234.963	0	Inf	1.37e-24	1.41e-21	-	Zm00001d014648
Zm00001d014649	192.301	4.71573	5.3497	3.25e-15	9.96e-13	-	Zm00001d014649
Zm00001d014657	28.4281	0.444205	5.9999	0.00017957	0.0082175	-	Zm00001d014657
Zm00001d014674	182.931	669.976	-1.8728	5.9e-06	0.00045368	-	Zm00001d014674
Zm00001d014681	69.063	3.73609	4.2083	1.6e-06	0.0001454	-	Zm00001d014681
Zm00001d014704	160.66	19.3548	3.0532	7.25e-07	7.08e-05	-	Zm00001d014704
Zm00001d014744	2226.8	5786.99	-1.3778	0.00017173	0.0079576	-	Zm00001d014744
Zm00001d014772	2047.41	5415.5	-1.4033	0.00013144	0.0064235	-	NADH ubiquinone oxidoreductase B22-like subunit [Source:UniProtKB/TrEMBL;Acc:B6SHX4]
Zm00001d014840	156.839	7.64271	4.3591	0.0018008	0.04974	-	Zm00001d014840
Zm00001d014842	114.563	22.4046	2.3543	0.0001789	0.0081987	-	Zm00001d014842
Zm00001d014868	0.527342	211.042	-8.6446	1.44e-21	9.08e-19	-	Zm00001d014868
Zm00001d014873	0	191.668	#NAME?	2.05e-21	1.27e-18	-	Zm00001d014873
Zm00001d014885	522.805	41.4739	3.656	1.6e-14	4.46e-12	-	Nucleic acid binding protein [Source:UniProtKB/TrEMBL;Acc:B4FG21]
Zm00001d014919	5172.9	71.1843	6.1833	4.24e-41	2.19e-37	-	Zm00001d014919
Zm00001d014945	1799.12	182.692	3.2998	3.24e-15	9.96e-13	-	L-lactate dehydrogenase [Source:UniProtKB/TrEMBL;Acc:B4FEG4]
Zm00001d014958	1189.96	330.455	1.8484	0.00010856	0.0055234	-	Zm00001d014958
Zm00001d014965	7.30108	54.2211	-2.8927	0.00050599	0.01918	-	Zm00001d014965
Zm00001d015008	6.93338	132.993	-4.2616	8.45e-10	1.48e-07	-	Zm00001d015008
Zm00001d015028	540.876	1.6063	8.3954	1.98e-30	3.83e-27	-	Zm00001d015028
Zm00001d015030	1555.11	679.661	1.1941	0.0014722	0.043168	-	Zm00001d015030
Zm00001d015031	235.067	17.7366	3.7283	5.9e-07	5.89e-05	-	Zm00001d015031
Zm00001d015032	69.3898	6.77816	3.3558	1.81e-05	0.0011885	-	Zm00001d015032
Zm00001d015037	636.499	229.521	1.4715	0.0002407	0.010369	-	Zm00001d015037
Zm00001d015050	172.37	0.979637	7.459	2.12e-05	0.0013663	-	Zm00001d015050
Zm00001d015095	7558.4	3415.11	1.1461	0.0016564	0.046925	-	Lil3 protein [Source:UniProtKB/TrEMBL;Acc:B4FDC9]
Zm00001d015101	267.161	1145.44	-2.1001	0.0011039	0.035131	-	Zm00001d015101
Zm00001d015129	278.91	105.678	1.4001	0.0013842	0.041293	-	Zm00001d015129
Zm00001d015204	28445.8	12368.3	1.2016	0.00073295	0.025562	-	Zm00001d015204
Zm00001d015212	59.0881	422.37	-2.8376	8.82e-10	1.54e-07	-	Zm00001d015212
Zm00001d015221	18.5311	122.102	-2.7201	1.19e-05	0.00084134	-	Zm00001d015221
Zm00001d015226	185.735	54.094	1.7797	0.00062346	0.022714	-	Zm00001d015226
Zm00001d015242	2.51415	1914.48	-9.5727	8.6e-54	2.66e-49	-	Zm00001d015242
Zm00001d015256	49.6738	0	Inf	4.03e-08	5.21e-06	-	Glycosyltransferases [Source:UniProtKB/TrEMBL;Acc:A0A1D6H0S9]
Zm00001d015270	26.1144	0	Inf	8.1e-05	0.0043406	-	Zm00001d015270
Zm00001d015283	24.5324	0	Inf	0.00013846	0.0067033	-	Zm00001d015283
Zm00001d015320	30.5745	0	Inf	1.76e-05	0.0011586	-	Zm00001d015320
Zm00001d015344	210.672	45.3924	2.2145	1.6e-05	0.0010727	-	Zm00001d015344
Zm00001d015372	0.486487	57.2947	-6.8799	3.02e-05	0.0018504	-	Zm00001d015372
Zm00001d015404	11.7203	102.231	-3.1247	0.0011016	0.035131	-	Zm00001d015404
Zm00001d015431	2530.18	5854.16	-1.2102	0.00081964	0.027802	-	Fiber protein Fb15 [Source:UniProtKB/TrEMBL;Acc:B6TLX2]
Zm00001d015444	151.681	411.066	-1.4383	0.00062994	0.022819	-	Zm00001d015444
Zm00001d015445	0.527342	206.211	-8.6112	2.79e-21	1.62e-18	-	Zm00001d015445
Zm00001d015497	1.05468	924.352	-9.7755	2.61e-44	1.61e-40	-	Zm00001d015497
Zm00001d015519	755.573	288.275	1.3901	0.0011991	0.037582	-	Zm00001d015519
Zm00001d015591	0	25.2762	#NAME?	0.00011718	0.005847	-	Zm00001d015591
Zm00001d015623	198.45	34.6522	2.5178	0.00011259	0.0056647	-	Glycosyltransferase [Source:UniProtKB/TrEMBL;Acc:B6TZ09]
Zm00001d015690	110.7	0	Inf	3.86e-11	8.07e-09	-	Zm00001d015690
Zm00001d015724	242.368	31.0628	2.9639	1.06e-06	0.00010178	-	Zm00001d015724
Zm00001d015747	241.451	7.11921	5.0839	2.89e-16	1e-13	-	Zm00001d015747
Zm00001d015783	54.342	198.894	-1.8719	0.0012588	0.038874	-	Zm00001d015783
Zm00001d015830	0	17.8952	#NAME?	0.0016304	0.046485	-	Zm00001d015830
Zm00001d015870	61.5614	0.88841	6.1147	5.11e-08	6.32e-06	-	Zm00001d015870
Zm00001d015917	543.164	1641.64	-1.5957	2.18e-05	0.0013961	-	Zm00001d015917
Zm00001d015918	990.454	405.76	1.2875	0.00085595	0.028635	-	Zm00001d015918
Zm00001d015976	3146.07	987.449	1.6718	8.84e-06	0.00064532	-	Zm00001d015976
Zm00001d016006	206.814	28.6593	2.8513	1.21e-07	1.37e-05	-	Zm00001d016006
Zm00001d016060	74.3735	251.124	-1.7555	0.00018719	0.0085409	-	B-cell receptor-associated protein 31-like containing protein [Source:UniProtKB/TrEMBL;Acc:B6TG43]
Zm00001d016080	2.51415	403.772	-7.3273	4.94e-28	6.37e-25	-	Zm00001d016080
Zm00001d016083	15.8982	92.4507	-2.5398	0.00013138	0.0064235	-	Zm00001d016083
Zm00001d016085	1.58203	130.181	-6.3626	1.28e-06	0.00011993	-	Zm00001d016085
Zm00001d016103	344.004	94.1321	1.8697	4.76e-05	0.0027587	-	Zm00001d016103
Zm00001d016128	7.665	278.862	-5.1851	0.00088828	0.029547	-	Zm00001d016128
Zm00001d016159	293.104	790.411	-1.4312	0.00028525	0.011909	-	Zm00001d016159
Zm00001d016163	0.972973	29.9245	-4.9428	0.00037816	0.014979	-	Zm00001d016163
Zm00001d016164	9.0019	178.678	-4.311	8.09e-12	1.83e-09	-	Zm00001d016164
Zm00001d016183	1.58203	92.4823	-5.8693	1.25e-10	2.44e-08	-	Zm00001d016183
Zm00001d016193	108.357	0	Inf	9.86e-15	2.85e-12	-	Zm00001d016193
Zm00001d016238	168.452	0	Inf	5.32e-20	2.53e-17	-	Zm00001d016238
Zm00001d016242	158.387	1600.18	-3.3367	1.61e-15	5.09e-13	-	Zm00001d016242
Zm00001d016277	17.0755	108.771	-2.6713	1.95e-05	0.0012691	-	Auxin-responsive protein [Source:UniProtKB/TrEMBL;Acc:A0A1D6H6I5]
Zm00001d016280	34.9975	0	Inf	4.3e-06	0.00034588	-	Zm00001d016280
Zm00001d016298	44.5343	188.986	-2.0853	3.78e-05	0.0022636	-	Zm00001d016298
Zm00001d016299	358.955	1468.89	-2.0328	1.36e-05	0.00094983	-	Zm00001d016299
Zm00001d016308	459.417	1260.36	-1.456	0.00014417	0.0068898	-	Zm00001d016308
Zm00001d016322	640.549	43.8338	3.8692	9.2e-05	0.0048316	-	Zm00001d016322
Zm00001d016396	12.2068	98.4036	-3.011	0.0017544	0.048894	-	Zm00001d016396
Zm00001d016417	67.7669	4.28345	3.9837	2.06e-06	0.00018358	-	Zm00001d016417
Zm00001d016424	17.1125	76.3878	-2.1583	0.0016513	0.046823	-	Zm00001d016424
Zm00001d016429	82.0831	0.535432	7.2602	5.7e-11	1.17e-08	-	Zm00001d016429
Zm00001d016435	36.7801	0	Inf	2.33e-06	0.00020565	-	Zm00001d016435
Zm00001d016438	1904.69	358.714	2.4087	5.37e-10	9.84e-08	-	3-ketoacyl-CoA synthase [Source:UniProtKB/TrEMBL;Acc:C4J6K8]
Zm00001d016457	558.174	157.844	1.8222	1.58e-05	0.0010637	-	Zm00001d016457
Zm00001d016477	64.8889	1255.58	-4.2742	5.3e-22	3.56e-19	-	Zm00001d016477
Zm00001d016552	1809.38	743.726	1.2827	0.00076489	0.026497	-	Zm00001d016552
Zm00001d016557	655.419	221.6	1.5645	0.00011592	0.0057932	-	Zm00001d016557
Zm00001d016567	842.052	4994.05	-2.5682	2e-11	4.33e-09	-	Zm00001d016567
Zm00001d016568	420.324	1453.84	-1.7903	3.63e-06	0.00030188	-	Zm00001d016568
Zm00001d016577	393.774	144.605	1.4452	0.0010506	0.033749	-	Zm00001d016577
Zm00001d016619	1050.77	2537.34	-1.2719	0.00064762	0.023188	-	Cytochrome b-c1 complex subunit Rieske, mitochondrial [Source:UniProtKB/TrEMBL;Acc:B4F892]
Zm00001d016635	2335.59	624.509	1.903	3.61e-07	3.75e-05	-	Zm00001d016635
Zm00001d016660	1061.32	5381.07	-2.342	3.61e-05	0.0021769	-	Peptidyl-prolyl cis-trans isomerase [Source:UniProtKB/TrEMBL;Acc:B4FZZ2]
Zm00001d016679	15.4117	321.531	-4.3829	6.38e-16	2.1e-13	-	Zm00001d016679
Zm00001d016691	4472.35	17446	-1.9638	9.42e-08	1.08e-05	-	Zm00001d016691
Zm00001d016697	2043.04	656.571	1.6377	0.00024576	0.010516	-	Zm00001d016697
Zm00001d016714	1601.6	668.667	1.2602	0.00080218	0.027478	-	Zm00001d016714
Zm00001d016740	31.5104	499.875	-3.9877	0.0012056	0.03771	-	Zm00001d016740
Zm00001d016744	180.792	13.0883	3.788	2.93e-10	5.57e-08	-	Zm00001d016744
Zm00001d016786	381.883	58.9803	2.6948	1.35e-08	1.89e-06	-	Zm00001d016786
Zm00001d016794	0	38.2613	#NAME?	1.51e-06	0.00013971	-	Zm00001d016794
Zm00001d016801	113.582	425.809	-1.9065	1.42e-05	0.0009739	-	Zm00001d016801
Zm00001d016802	8121.02	3174.05	1.3553	0.00019917	0.0089555	-	Zm00001d016802
Zm00001d016806	109.646	7.30166	3.9085	6.41e-06	0.00048876	-	Hexosyltransferase [Source:UniProtKB/TrEMBL;Acc:A0A1D6HAF0]
Zm00001d016827	43.9177	289.342	-2.7199	3.11e-08	4.13e-06	-	Zm00001d016827
Zm00001d016832	2959.06	1219.08	1.2793	0.00054583	0.020295	-	Protein AIG1 [Source:UniProtKB/TrEMBL;Acc:B6T438]
Zm00001d016841	2473	533.089	2.2138	6.05e-09	8.87e-07	-	Zm00001d016841
Zm00001d016850	366.382	1536.33	-2.0681	1.06e-07	1.21e-05	-	Molybdopterin synthase sulfur carrier subunit [Source:UniProtKB/TrEMBL;Acc:A0A0B4J391]
Zm00001d016851	106.159	20.2075	2.3933	0.00063437	0.022901	-	Zm00001d016851
Zm00001d016864	2960.94	7663.45	-1.3719	0.00017025	0.0079199	-	Zm00001d016864
Zm00001d016866	1561.08	629.707	1.3098	0.00073971	0.025721	-	Zm00001d016866
Zm00001d016896	465.503	170.08	1.4526	0.00052903	0.019813	-	Glycosyltransferase [Source:UniProtKB/TrEMBL;Acc:A0A1D6HB18]
Zm00001d016899	54.7838	0.444205	6.9464	6.66e-08	7.93e-06	-	Zm00001d016899
Zm00001d016933	77.7456	10.776	2.8509	0.00014492	0.0069078	-	Zm00001d016933
Zm00001d016947	295.692	40.1532	2.8805	2.9e-07	3.09e-05	-	Zm00001d016947
Zm00001d016948	228.509	7.31359	4.9655	6.08e-16	2.02e-13	-	Zm00001d016948
Zm00001d016949	1240.59	502.14	1.3049	0.00091833	0.030254	-	Zm00001d016949
Zm00001d016963	164.764	26.8825	2.6157	3.09e-06	0.00026273	-	Zm00001d016963
Zm00001d017130	584.979	149.674	1.9666	4.4e-06	0.00035166	-	mTERF transcription factor [Source:UniProtKB/TrEMBL;Acc:B4FY60]
Zm00001d017187	796.423	242.878	1.7133	2.05e-05	0.0013236	-	GrpE protein homolog [Source:UniProtKB/TrEMBL;Acc:B4FLR0]
Zm00001d017199	16824.8	6960.68	1.2733	0.00035022	0.014091	-	Temperature-induced lipocalin-1 [Source:UniProtKB/TrEMBL;Acc:Q38JE7]
Zm00001d017208	149.107	8.7255	4.095	3.16e-10	5.93e-08	-	Zm00001d017208
Zm00001d017249	14.2753	112.305	-2.9758	4.34e-06	0.00034782	-	Ammonium transporter [Source:UniProtKB/TrEMBL;Acc:B4F978]
Zm00001d017290	26.3149	0	Inf	0.0018032	0.04976	-	Zm00001d017290
Zm00001d017380	260.283	72.6398	1.8413	0.00025224	0.010748	-	Zm00001d017380
Zm00001d017416	1.01383	243.061	-7.9054	1.24e-22	9.55e-20	-	Pectate lyase [Source:UniProtKB/TrEMBL;Acc:A0A1D6HEQ3]
Zm00001d017418	324.852	9.27286	5.1306	2.88e-19	1.31e-16	-	Aldehyde dehydrogenase [Source:UniProtKB/TrEMBL;Acc:A0A1D6HEQ6]
Zm00001d017461	193.293	544.693	-1.4947	0.00024133	0.010369	-	Zm00001d017461
Zm00001d017462	930.119	241.899	1.943	1.45e-06	0.000134	-	Zm00001d017462
Zm00001d017477	22.6273	116.624	-2.3657	0.0014692	0.043163	-	AP2-EREBP transcription factor [Source:UniProtKB/TrEMBL;Acc:A0A060D1W7]
Zm00001d017598	25.2678	180.598	-2.8374	0.00059206	0.021819	-	Zm00001d017598
Zm00001d017653	437.551	150.249	1.5421	0.00024461	0.010481	-	Zm00001d017653
Zm00001d017684	299.284	116.137	1.3657	0.001468	0.043163	-	Zm00001d017684
Zm00001d017713	102.586	0	Inf	7.73e-06	0.00057309	-	Zm00001d017713
Zm00001d017720	91.6123	13.0763	2.8086	5.4e-05	0.003074	-	DNA topoisomerase 2 [Source:UniProtKB/TrEMBL;Acc:A0A1D6HGU3]
Zm00001d017751	877.263	312.778	1.4879	0.00014432	0.0068898	-	Zm00001d017751
Zm00001d017755	136.949	389.966	-1.5097	0.00039826	0.015654	-	Zm00001d017755
Zm00001d018096	535.495	216.385	1.3073	0.0013839	0.041293	-	Zm00001d018096
Zm00001d018181	21.736	0.535432	5.3432	0.0014609	0.043	-	Zm00001d018181
Zm00001d018190	9.20617	81.8768	-3.1528	1.4e-05	0.00096733	-	Zm00001d018190
Zm00001d018220	7204.25	2577.46	1.4829	5.19e-05	0.0029782	-	Glutathione S-transferase GST 24 [Source:UniProtKB/TrEMBL;Acc:Q9FQB5]
Zm00001d018332	269.021	80.6355	1.7382	0.00022904	0.0099796	-	Zm00001d018332
Zm00001d018491	313.763	73.2468	2.0988	4.21e-06	0.00033928	-	Zm00001d018491
Zm00001d018497	194.083	1629.97	-3.0701	4.74e-14	1.27e-11	-	Zm00001d018497
Zm00001d018665	163.256	29.0361	2.4912	5.47e-06	0.00042414	-	Zm00001d018665
Zm00001d018882	394.316	146.787	1.4256	0.00070975	0.025064	-	Small nuclear ribonucleoprotein-associated protein [Source:UniProtKB/TrEMBL;Acc:A0A1D6HT10]
Zm00001d018984	1258.26	475.592	1.4036	0.00021397	0.0094561	-	Zm00001d018984
Zm00001d019045	2100.28	871.641	1.2688	0.00078684	0.027045	-	Histone H2A [Source:UniProtKB/TrEMBL;Acc:B6SJU3]
Zm00001d019069	36.2565	139.31	-1.942	0.00037489	0.014887	-	Zm00001d019069
Zm00001d019225	284.701	718.069	-1.3347	0.00062645	0.022723	-	Zm00001d019225
Zm00001d019320	4.62352	58.0245	-3.6496	2.97e-05	0.001824	-	Zm00001d019320
Zm00001d019475	21.6135	0	Inf	0.00039203	0.015429	-	AP2-EREBP transcription factor [Source:UniProtKB/TrEMBL;Acc:A0A060D6G1]
Zm00001d019479	627.067	5392.72	-3.1043	3.18e-15	9.92e-13	-	Starch synthase, chloroplastic/amyloplastic [Source:UniProtKB/TrEMBL;Acc:A0A1D6HXP2]
Zm00001d019734	264.851	72.8222	1.8627	8.62e-05	0.0045492	-	Zm00001d019734
Zm00001d019750	3075.57	911.43	1.7547	3.59e-06	0.00030029	-	Zm00001d019750
Zm00001d019850	82.9335	240.05	-1.5333	0.00089916	0.029845	-	Fatty acyl-CoA reductase [Source:UniProtKB/TrEMBL;Acc:C4J2V6]
Zm00001d019898	5098.64	2016.08	1.3386	0.00019911	0.0089555	-	Plastid-specific 30S ribosomal protein 2 [Source:UniProtKB/TrEMBL;Acc:B6TDF7]
Zm00001d020042	459.049	182.692	1.3292	0.0012092	0.037784	-	Zm00001d020042
Zm00001d020058	0	324.149	#NAME?	1e-22	7.95e-20	-	Zm00001d020058
Zm00001d020306	80.0925	242.934	-1.6008	0.00060794	0.022336	-	Zm00001d020306
Zm00001d020390	198.807	27.7589	2.8403	0.0012951	0.039368	-	Zm00001d020390
Zm00001d020395	3.08234	41.7595	-3.76	0.00025729	0.010918	-	Protein CCC1 [Source:UniProtKB/TrEMBL;Acc:B6SS47]
Zm00001d020437	1036.07	385.156	1.4276	0.00022648	0.0098819	-	Zm00001d020437
Zm00001d020488	0.972973	37.6943	-5.2758	0.00035028	0.014091	-	Zm00001d020488
Zm00001d020693	838.181	312.524	1.4233	0.0003573	0.01428	-	Putative uncharacterized protein [Source:UniProtKB/TrEMBL;Acc:B4FV69]
Zm00001d020705	1962.5	847.465	1.2115	0.0012037	0.037689	-	BHLH transcription factor [Source:UniProtKB/TrEMBL;Acc:B6STU1]
Zm00001d020711	494.143	137.387	1.8467	1.55e-05	0.0010584	-	Zm00001d020711
Zm00001d020717	1348.23	4198.64	-1.6389	9.41e-06	0.00068177	-	Zm00001d020717
Zm00001d020722	43.9624	188.482	-2.1001	0.00061809	0.022574	-	Polcalcin Jun o 2 [Source:UniProtKB/TrEMBL;Acc:B6T7W4]
Zm00001d020731	28.6694	124.89	-2.1231	0.00024126	0.010369	-	Zm00001d020731
Zm00001d020744	35.3244	3.56557	3.3085	0.0016454	0.046741	-	Zm00001d020744
Zm00001d020794	84.1925	979.572	-3.5404	3.04e-16	1.03e-13	-	Zm00001d020794
Zm00001d020811	76.8505	13.3619	2.5239	0.00033629	0.01367	-	Zm00001d020811
Zm00001d020821	132.08	342.381	-1.3742	0.0017193	0.048131	-	Zm00001d020821
Zm00001d020883	470.208	0	Inf	9.55e-13	2.33e-10	-	Zm00001d020883
Zm00001d020886	150.158	2.40348	5.9652	2.02e-14	5.53e-12	-	Zm00001d020886
Zm00001d021038	84.1849	391.815	-2.2185	0.00063443	0.022901	-	Zm00001d021038
Zm00001d021050	775.943	2234.83	-1.5261	4.52e-05	0.0026409	-	Zm00001d021050
Zm00001d021073	43.435	139.073	-1.6789	0.0017561	0.048898	-	Zm00001d021073
Zm00001d021087	34.7115	140.643	-2.0186	0.00026376	0.011131	-	Zm00001d021087
Zm00001d021128	140.67	467.881	-1.7338	4.65e-05	0.0027039	-	Zm00001d021128
Zm00001d021176	211.2	47.685	2.147	1.33e-05	0.00093457	-	Zm00001d021176
Zm00001d021231	419.592	1574.38	-1.9077	7.84e-07	7.6e-05	-	Rhomboid-like protein [Source:UniProtKB/TrEMBL;Acc:B4G1H4]
Zm00001d021245	2487.63	844.946	1.5578	3.78e-05	0.0022636	-	Rhodanese-like domain containing protein [Source:UniProtKB/TrEMBL;Acc:B6SR15]
Zm00001d021268	135.976	430.616	-1.6631	0.00010752	0.0054887	-	Zm00001d021268
Zm00001d021283	107.38	295.212	-1.459	0.0013307	0.040233	-	Zm00001d021283
Zm00001d021403	1811.07	472.507	1.9384	0.0013945	0.041558	-	Zm00001d021403
Zm00001d021422	2182.55	892.635	1.2899	0.00062212	0.022695	-	Histone H4 [Source:UniProtKB/TrEMBL;Acc:A0A1D6IAU4]
Zm00001d021461	69.2634	4.88625	3.8253	7.59e-06	0.00056569	-	Zm00001d021461
Zm00001d021629	37.8794	149.392	-1.9796	0.00023831	0.010311	-	Protein DETOXIFICATION [Source:UniProtKB/TrEMBL;Acc:B4G210]
Zm00001d021638	598.092	232.729	1.3617	0.00080941	0.027576	-	Mitochondrial protein [Source:UniProtKB/TrEMBL;Acc:B6SXQ2]
Zm00001d021647	218.408	25.4825	3.0994	5.78e-09	8.52e-07	-	Zm00001d021647
Zm00001d021664	319.928	103.179	1.6326	0.00031418	0.012942	-	Zm00001d021664
Zm00001d021684	181.483	477.686	-1.3962	0.00082581	0.027911	-	Zm00001d021684
Zm00001d021730	412.283	157.535	1.388	0.0012699	0.03898	-	Zm00001d021730
Zm00001d021843	242.231	762.875	-1.6551	4.18e-05	0.0024721	-	Low-molecular-weight cysteine-rich protein LCR70 [Source:UniProtKB/TrEMBL;Acc:B6SMX5]
Zm00001d021905	29.2785	0	Inf	2.81e-05	0.0017348	-	Zm00001d021905
Zm00001d021933	75.8329	1.77682	5.4155	1.48e-08	2.06e-06	-	Zm00001d021933
Zm00001d021938	306.53	1524.6	-2.3143	3.51e-09	5.48e-07	-	Zm00001d021938
Zm00001d021957	36.4608	2.31225	3.979	0.0015446	0.044824	-	Zm00001d021957
Zm00001d021962	3761.49	1656.55	1.1831	0.0011304	0.03583	-	Zm00001d021962
Zm00001d021971	105.713	336.222	-1.6693	0.00023899	0.010326	-	Zm00001d021971
Zm00001d021977	176.332	12.7472	3.79	2.24e-10	4.28e-08	-	Zm00001d021977
Zm00001d021981	33.0924	178.325	-2.4299	5.67e-06	0.00043736	-	Zm00001d021981
Zm00001d022057	55.3929	179.432	-1.6957	0.00091393	0.030141	-	Zm00001d022057
Zm00001d022089	60.0943	279.561	-2.2179	4.61e-06	0.00036413	-	EGG APPARATUS-1 protein [Source:UniProtKB/TrEMBL;Acc:B6TF57]
Zm00001d022198	1.45946	26.7793	-4.1976	0.0016794	0.047327	-	Zm00001d022198
Zm00001d022234	1429.64	560.49	1.3509	0.00049703	0.018866	-	EF hand family protein [Source:UniProtKB/TrEMBL;Acc:B6UH18]
Zm00001d022254	60.425	227.756	-1.9143	0.00010163	0.0052485	-	Zm00001d022254
Zm00001d022420	6162.23	27751.2	-2.171	8.84e-06	0.00064532	-	Stress responsive protein [Source:UniProtKB/TrEMBL;Acc:B6TF92]
Zm00001d022421	9773.36	30996	-1.6652	4.45e-06	0.00035356	-	Zm00001d022421
Zm00001d022437	179.043	57.4259	1.6405	0.00067052	0.02387	-	Zm00001d022437
Zm00001d022516	2516.53	8909.72	-1.8239	2.08e-05	0.0013402	-	Zm00001d022516
Zm00001d022526	15.2891	72.4573	-2.2446	0.0012825	0.039089	-	Zm00001d022526
Zm00001d022529	233.366	53.2414	2.132	4.35e-05	0.0025545	-	Zm00001d022529
Zm00001d022557	2005.39	8950.86	-2.1581	2.01e-05	0.0013015	-	Zm00001d022557
Zm00001d022630	2377.88	10716.7	-2.1721	0.00072191	0.025378	-	Extracellular ribonuclease LE [Source:UniProtKB/TrEMBL;Acc:B6SSH9]
Zm00001d023376	2928.92	7290.21	-1.3156	0.00030201	0.01249	-	Zm00001d023376
Zm00001d023437	1250.18	3247.87	-1.3774	0.0002232	0.0097918	-	Glycine cleavage complex P-protein [Source:UniProtKB/TrEMBL;Acc:K7TIN2]
Zm00001d023480	281.325	94.989	1.5664	0.00070581	0.024954	-	Zm00001d023480
Zm00001d023592	62.902	412.542	-2.7134	4.07e-09	6.21e-07	-	Zm00001d023592
Zm00001d023673	599.783	1856.44	-1.63	1.38e-05	0.00095411	-	Bidirectional sugar transporter SWEET [Source:UniProtKB/TrEMBL;Acc:B4FXF4]
Zm00001d023759	119.335	0	Inf	9.43e-08	1.08e-05	-	Zm00001d023759
Zm00001d023799	73.4898	254.642	-1.7929	0.0001567	0.0073843	-	Zm00001d023799
Zm00001d023811	224.049	38.2058	2.5519	5.91e-07	5.89e-05	-	Pathogeneis protein 10 [Source:UniProtKB/TrEMBL;Acc:B6SQM6]
Zm00001d023840	0.527342	78.1288	-7.211	1.74e-08	2.39e-06	-	Zm00001d023840
Zm00001d023843	528.342	199.453	1.4054	0.00078043	0.026915	-	Zm00001d023843
Zm00001d023863	253.925	92.7679	1.4527	0.0016618	0.04699	-	Riboflavin synthase alpha chain [Source:UniProtKB/TrEMBL;Acc:B6TDF2]
Zm00001d023869	58.9209	538.871	-3.1931	2.67e-12	6.26e-10	-	Zm00001d023869
Zm00001d023873	6.61032	283.73	-5.4237	9.88e-19	4.31e-16	-	Zm00001d023873
Zm00001d024029	6.08298	52.5474	-3.1108	0.00038857	0.015332	-	Zm00001d024029
Zm00001d024037	59.5261	624.726	-3.3916	8.75e-14	2.27e-11	-	Beta-glucosidase2 [Source:UniProtKB/TrEMBL;Acc:K7TGE1]
Zm00001d024071	49.7185	168.224	-1.7585	0.00072447	0.02541	-	Xyloglucan endotransglucosylase/hydrolase [Source:UniProtKB/TrEMBL;Acc:B4FSS4]
Zm00001d024083	97.1604	329.681	-1.7626	0.00010551	0.0053949	-	Zm00001d024083
Zm00001d024126	0	136.955	#NAME?	3.47e-17	1.31e-14	-	Zm00001d024126
Zm00001d024138	18.9359	0	Inf	0.00099376	0.032224	-	Zm00001d024138
Zm00001d024200	56.7707	175.101	-1.625	0.0013511	0.04062	-	CONSTANS-like protein CO8 [Source:UniProtKB/TrEMBL;Acc:B6SZU8]
Zm00001d024208	85.4885	2.75646	4.9548	1.18e-08	1.67e-06	-	Zm00001d024208
Zm00001d024211	153.088	14.524	3.3979	1.74e-08	2.39e-06	-	Zm00001d024211
Zm00001d024248	2472.48	1085.42	1.1877	0.0012896	0.039265	-	Plastid transcriptionally active 12-like protein [Source:UniProtKB/TrEMBL;Acc:K7TKX8]
Zm00001d024314	1281.25	560.697	1.1923	0.0017898	0.049479	-	Putative cinnamyl-alcohol dehydrogenase family protein [Source:UniProtKB/TrEMBL;Acc:K7TH21]
Zm00001d024454	212.704	56.3866	1.9154	9.6e-05	0.005023	-	Plant elicitor peptide 4 [Source:UniProtKB/TrEMBL;Acc:K7TLF3]
Zm00001d024458	171.378	48.0022	1.836	0.00038091	0.015068	-	Zm00001d024458
Zm00001d024471	120.858	319.83	-1.404	0.0015082	0.044015	-	Zm00001d024471
Zm00001d024476	151.428	40.9623	1.8863	0.00045996	0.017764	-	Zm00001d024476
Zm00001d024518	2908.4	9321.43	-1.6803	2.21e-05	0.0014074	-	Zm00001d024518
Zm00001d024560	4.5418	245.92	-5.7588	1.67e-18	7.07e-16	-	Zm00001d024560
Zm00001d024672	443.626	159.244	1.4781	0.00052145	0.019658	-	Putative RING finger and ARM repeat-containing protein containing family protein [Source:UniProtKB/TrEMBL;Acc:K7TM26]
Zm00001d024713	6.04212	372.872	-5.9475	4.92e-23	4.12e-20	-	Zm00001d024713
Zm00001d024744	7.54244	64.8939	-3.105	0.0001004	0.0052077	-	Zm00001d024744
Zm00001d024752	86.4501	9.34023	3.2103	0.0008814	0.02935	-	Peroxidase [Source:UniProtKB/TrEMBL;Acc:B4FSW5]
Zm00001d024763	454.307	159.352	1.5115	0.00028735	0.01198	-	3-N-debenzoyl-2-deoxytaxol N-benzoyltransferase [Source:UniProtKB/TrEMBL;Acc:B4G029]
Zm00001d024768	722.897	250.196	1.5307	0.00010815	0.0055117	-	Zm00001d024768
Zm00001d024802	34.3106	197.589	-2.5258	1.58e-06	0.00014481	-	Zm00001d024802
Zm00001d024839	4720.89	2074.17	1.1865	0.0011979	0.037582	GST4	Glutathione S-transferase 4 [Source:UniProtKB/Swiss-Prot;Acc:P46420]
Zm00001d024842	0.527342	24.0586	-5.5117	0.00087075	0.029033	-	Zm00001d024842
Zm00001d024843	1788.81	628.042	1.5101	7.04e-05	0.0038757	-	Acc oxidase [Source:UniProtKB/TrEMBL;Acc:Q6JN55]
Zm00001d024926	54.9473	210.63	-1.9386	9.48e-05	0.0049705	-	Zm00001d024926
Zm00001d024939	127.223	858.129	-2.7538	1.73e-10	3.36e-08	-	Zm00001d024939
Zm00001d024942	0	25.6291	#NAME?	0.00010196	0.0052548	-	Zm00001d024942
Zm00001d025170	255.86	1035.59	-2.017	3.49e-07	3.64e-05	-	Acyl-[acyl-carrier-protein] desaturase [Source:UniProtKB/TrEMBL;Acc:K7U2K6]
Zm00001d025218	418.143	130.716	1.6776	7.08e-05	0.0038911	-	MYND finger family protein [Source:UniProtKB/TrEMBL;Acc:K7TJT2]
Zm00001d025255	118.365	31.1659	1.9252	0.0008056	0.027492	-	Zm00001d025255
Zm00001d025288	245.904	75.2334	1.7086	0.00050779	0.01918	-	Zm00001d025288
Zm00001d025326	81.5149	377.695	-2.2121	1.07e-06	0.00010265	-	Zm00001d025326
Zm00001d025333	1877.28	538.023	1.8029	1.58e-06	0.00014481	-	Arogenate dehydratase [Source:UniProtKB/TrEMBL;Acc:B4FQG2]
Zm00001d025354	0	131.541	#NAME?	3.85e-16	1.29e-13	-	Zm00001d025354
Zm00001d025476	0	27.7035	#NAME?	5.92e-05	0.0033457	-	Zm00001d025476
Zm00001d025533	286.038	2912.76	-3.3481	9.66e-10	1.67e-07	-	Putative oxidoreductase, aldo/keto reductase family protein [Source:UniProtKB/TrEMBL;Acc:K7TPL8]
Zm00001d025545	586.298	3163.94	-2.432	1.37e-06	0.00012807	-	Zeaxanthin epoxidase, chloroplastic [Source:UniProtKB/TrEMBL;Acc:A0A1D6J7P5]
Zm00001d025654	3024.37	607.513	2.3156	2.45e-09	3.94e-07	-	ATFP4 [Source:UniProtKB/TrEMBL;Acc:B4FQF9]
Zm00001d025660	300.981	817.674	-1.4419	0.00025294	0.010763	RAB2B	Ras protein Rab-2-B [Source:UniProtKB/TrEMBL;Acc:B6U232]
Zm00001d025662	82.4024	19.5134	2.0782	0.0013779	0.041183	-	Zm00001d025662
Zm00001d025690	408.606	971.081	-1.2489	0.0012779	0.039089	-	Isocitrate dehydrogenase subunit 1 [Source:UniProtKB/TrEMBL;Acc:B4FID6]
Zm00001d025734	104.662	341.726	-1.7071	0.00012026	0.005981	-	Zm00001d025734
Zm00001d025740	30.5783	128.455	-2.0707	0.00025879	0.010967	-	Zm00001d025740
Zm00001d025803	5.39221	179.031	-5.0532	7.53e-14	1.97e-11	-	Putative DUF869 domain containing family protein [Source:UniProtKB/TrEMBL;Acc:K7TQM2]
Zm00001d025894	258.229	643.613	-1.3175	0.0011031	0.035131	-	Zm00001d025894
Zm00001d025923	369.928	2063.75	-2.4799	0.0016505	0.046823	-	Zm00001d025923
Zm00001d025943	189.025	65.2034	1.5356	0.0017792	0.049274	-	Zm00001d025943
Zm00001d025947	66.7198	195.15	-1.5484	0.0012803	0.039089	-	SAUR11-auxin-responsive SAUR family member [Source:UniProtKB/TrEMBL;Acc:B6SMD8]
Zm00001d025980	58.6387	438.053	-2.9012	4.41e-05	0.0025857	-	Zm00001d025980
Zm00001d026016	273.203	92.0185	1.57	0.000524	0.0197	-	Zm00001d026016
Zm00001d026018	2755.46	679.543	2.0197	4.07e-07	4.18e-05	-	CDPK protein [Source:UniProtKB/TrEMBL;Acc:C3UZ61]
Zm00001d026060	391.576	112.785	1.7957	3.2e-05	0.0019464	-	Zm00001d026060
Zm00001d026072	206.279	46.2689	2.1565	0.00010484	0.0053697	-	Zm00001d026072
Zm00001d026096	2.02766	72.9612	-5.1692	4.5e-08	5.64e-06	-	Zm00001d026096
Zm00001d026097	634.051	2266.68	-1.8379	1.52e-06	0.00013976	-	Zm00001d026097
Zm00001d026124	929.187	252.694	1.8786	3.56e-06	0.00029815	-	Zm00001d026124
Zm00001d026137	16.0987	261.016	-4.0191	5.76e-13	1.43e-10	-	Zm00001d026137
Zm00001d026139	111.93	318.997	-1.5109	0.00071564	0.025243	-	Zm00001d026139
Zm00001d026154	64.8366	1020.78	-3.9767	6.48e-19	2.86e-16	-	Glutathione peroxidase [Source:UniProtKB/TrEMBL;Acc:Q7FS88]
Zm00001d026156	632.747	97.2738	2.7015	1.71e-06	0.00015556	-	Putative glycerol 3-phosphate permease [Source:UniProtKB/TrEMBL;Acc:B8A0W6]
Zm00001d026164	129.076	0	Inf	1.04e-16	3.8e-14	-	Zm00001d026164
Zm00001d026182	0	316.343	#NAME?	5.16e-13	1.3e-10	-	Zm00001d026182
Zm00001d026187	30.7788	221.358	-2.8464	5.57e-08	6.79e-06	-	Zm00001d026187
Zm00001d026200	200.025	0	Inf	8.36e-08	9.83e-06	-	Zm00001d026200
Zm00001d026222	0.527342	57.628	-6.7719	4.4e-08	5.53e-06	-	Zm00001d026222
Zm00001d026244	1451.69	554.022	1.3897	0.00031015	0.012793	-	Putative putrescine-binding domain family protein [Source:UniProtKB/TrEMBL;Acc:B7ZYY2]
Zm00001d026255	45.99	5.69537	3.0135	0.0011366	0.035989	-	Zm00001d026255
Zm00001d026277	1.50032	45.5194	-4.9231	1.38e-05	0.00095411	-	Zm00001d026277
Zm00001d026295	160.668	5.25116	4.9353	7.8e-13	1.92e-10	-	Zm00001d026295
Zm00001d026297	25.1415	795.197	-4.9832	0.0013318	0.040233	-	Zm00001d026297
Zm00001d026300	490.853	15.583	4.9772	2.83e-21	1.62e-18	-	Zm00001d026300
Zm00001d026305	83.6613	1.33261	5.9722	7.97e-10	1.41e-07	-	Zm00001d026305
Zm00001d026360	1131.93	404.585	1.4843	0.00019456	0.0088122	-	Cyclin-dependent protein kinase [Source:UniProtKB/TrEMBL;Acc:B6TX30]
Zm00001d026376	0.972973	36.3932	-5.2251	4.99e-05	0.0028752	-	Zm00001d026376
Zm00001d026392	0	582.173	#NAME?	1.07e-27	1.32e-24	-	Zm00001d026392
Zm00001d026412	2.06851	46.3405	-4.4856	0.0012714	0.03898	-	Zm00001d026412
Zm00001d026421	10.8253	63.9023	-2.5615	0.00082059	0.027804	-	DNA-directed RNA polymerase subunit beta [Source:UniProtKB/TrEMBL;Acc:A0A1D6JFH0]
Zm00001d026442	0.527342	50.1874	-6.5724	2.67e-07	2.87e-05	-	Zm00001d026442
Zm00001d026447	292.967	97.3209	1.5899	0.0015192	0.044211	-	Zm00001d026447
Zm00001d026467	0	65.2034	#NAME?	7.12e-10	1.27e-07	-	Zm00001d026467
Zm00001d026489	781.714	217.356	1.8466	8.34e-06	0.0006129	-	Zm00001d026489
Zm00001d026498	61.6431	4.45398	3.7908	1.34e-05	0.00094146	-	Zm00001d026498
Zm00001d026505	82.9592	0	Inf	0.00013437	0.0065384	-	Zm00001d026505
Zm00001d026521	151.759	595.175	-1.9715	2.58e-06	0.00022406	-	Inner membrane protease subunit 1 [Source:UniProtKB/TrEMBL;Acc:K7TXB6]
Zm00001d026522	187.22	32.0543	2.5461	3.61e-06	0.00030141	-	Zm00001d026522
Zm00001d026528	46.2684	665.796	-3.847	1.23e-16	4.38e-14	-	Zm00001d026528
Zm00001d026531	118.61	11.7556	3.3348	3.09e-07	3.27e-05	-	Zm00001d026531
Zm00001d026562	96.9228	344.003	-1.8275	3.66e-05	0.0022	-	Zm00001d026562
Zm00001d026591	3.08234	56.6603	-4.2002	9.64e-06	0.00069542	-	Zm00001d026591
Zm00001d026665	455.588	161.684	1.4946	0.00045557	0.017705	-	Zm00001d026665
Zm00001d026669	329.539	1054.58	-1.6781	1.6e-05	0.0010727	-	Zm00001d026669
Zm00001d026677	344.784	1348.67	-1.9678	5.57e-07	5.61e-05	-	ATP binding protein [Source:UniProtKB/TrEMBL;Acc:B6SZ72]
Zm00001d026685	906.756	347.112	1.3853	0.00048405	0.018418	-	Zm00001d026685
Zm00001d026704	573.935	200.12	1.52	0.00019201	0.0087117	-	Zm00001d026704
Zm00001d027232	0	222.135	#NAME?	1.4e-23	1.31e-20	-	Zm00001d027232
Zm00001d027233	0	39.8676	#NAME?	9.31e-07	9e-05	-	Zm00001d027233
Zm00001d027236	19.8718	348.405	-4.132	3.56e-15	1.08e-12	-	Zm00001d027236
Zm00001d027239	74.6632	297.301	-1.9935	1.37e-05	0.00095411	-	Zm00001d027239
Zm00001d027242	615.911	0.444205	10.437	4.83e-22	3.32e-19	-	Zm00001d027242
Zm00001d027245	0	25.8116	#NAME?	9.83e-05	0.0051213	-	Zm00001d027245
Zm00001d027271	211.433	0	Inf	4.08e-23	3.51e-20	-	Zm00001d027271
Zm00001d027315	136.737	33.6725	2.0218	0.00024057	0.010369	-	Zm00001d027315
Zm00001d027431	15.0032	90.9476	-2.5998	0.00013641	0.0066141	-	Homeobox protein HD1 [Source:UniProtKB/TrEMBL;Acc:B6TPJ2]
Zm00001d027451	229.147	55.76	2.039	0.00034211	0.013871	-	Zm00001d027451
Zm00001d027530	529.412	176.644	1.5835	0.0001128	0.0056647	-	Zm00001d027530
Zm00001d027815	122.22	33.6725	1.8598	0.00090499	0.030006	-	Zm00001d027815
Zm00001d027873	377.178	149.087	1.3391	0.001644	0.046741	-	Zm00001d027873
Zm00001d027876	922.064	380.015	1.2788	0.0010298	0.03322	-	Zm00001d027876
Zm00001d027919	414.37	0	Inf	1.8e-33	5.06e-30	-	40S ribosomal protein SA [Source:UniProtKB/TrEMBL;Acc:A0A1D6JQM8]
Zm00001d027925	206.379	544.693	-1.4001	0.00060349	0.022199	-	AP2-EREBP transcription factor [Source:UniProtKB/TrEMBL;Acc:B4FQB2]
Zm00001d027932	70.6412	5.25116	3.7498	5.54e-06	0.00042825	-	Zm00001d027932
Zm00001d027987	88.7827	315.002	-1.827	0.00011251	0.0056647	-	Zm00001d027987
Zm00001d028004	1485.32	158.483	3.2284	7.34e-15	2.14e-12	-	Zm00001d028004
Zm00001d028083	201.191	0	Inf	2.5e-22	1.89e-19	-	Zm00001d028083
Zm00001d028140	531.889	1223.08	-1.2013	0.0014307	0.042421	-	Zm00001d028140
Zm00001d028164	597.223	1469.45	-1.2989	0.00052538	0.0197	-	Zm00001d028164
Zm00001d028165	124.059	5.06871	4.6133	2.43e-09	3.94e-07	-	Zm00001d028165
Zm00001d028252	79.4502	374.799	-2.238	0.00177	0.049108	-	Zm00001d028252
Zm00001d028298	1300.67	546.042	1.2522	0.00092712	0.030446	-	Zm00001d028298
Zm00001d028311	444.637	1361.02	-1.614	2.18e-05	0.001397	-	Protein DETOXIFICATION [Source:UniProtKB/TrEMBL;Acc:A0A1D6JUA9]
Zm00001d028338	2469.96	1001.57	1.3022	0.00045815	0.017739	-	Zm00001d028338
Zm00001d028423	406.649	164.742	1.3036	0.0015108	0.044049	-	Zm00001d028423
Zm00001d028572	108.149	497.9	-2.2028	0.00039909	0.015667	-	Zm00001d028572
Zm00001d028596	23.9642	190.811	-2.9932	7.45e-08	8.83e-06	-	Zm00001d028596
Zm00001d028603	171.909	460.873	-1.4227	0.00073994	0.025721	-	GRAS transcription factor [Source:UniProtKB/TrEMBL;Acc:A0A060D1U6]
Zm00001d028613	447.284	73.4608	2.6061	7.65e-09	1.11e-06	-	Zm00001d028613
Zm00001d028616	1480.63	598.293	1.3073	0.00047885	0.018292	-	Zm00001d028616
Zm00001d028751	2.47329	32.0424	-3.6955	0.0014597	0.043	-	Zm00001d028751
Zm00001d028778	80.9172	227.307	-1.4901	0.0013538	0.040659	-	Zm00001d028778
Zm00001d028806	425.553	82.9519	2.359	0.00060909	0.022342	-	Zm00001d028806
Zm00001d028808	801.344	250.743	1.6762	2.28e-05	0.0014344	-	Zm00001d028808
Zm00001d028941	427.587	77.665	2.4609	4.11e-08	5.28e-06	-	Zm00001d028941
Zm00001d028984	273.288	767.432	-1.4896	0.00017676	0.0081459	-	Zm00001d028984
Zm00001d029101	187.822	2850.2	-3.9236	3.04e-21	1.65e-18	-	Zm00001d029101
Zm00001d029114	0	65.4097	#NAME?	1.01e-05	0.00072266	-	Zm00001d029114
Zm00001d029233	70.5186	838.123	-3.5711	5.57e-10	1.01e-07	-	Zm00001d029233
Zm00001d029246	722.582	304.647	1.246	0.0014436	0.042693	-	Zm00001d029246
Zm00001d029247	285.643	64.1641	2.1544	6.86e-06	0.00051846	-	Zm00001d029247
Zm00001d029325	7512.96	3443.61	1.1255	0.0015765	0.045286	-	Zm00001d029325
Zm00001d029359	1415.24	351.027	2.0114	0.0016592	0.046961	-	Zm00001d029359
Zm00001d029360	17.3985	92.8592	-2.4161	0.00020272	0.0090754	-	Zm00001d029360
Zm00001d029387	84.3075	319.187	-1.9207	2.67e-05	0.0016492	-	LOL3 [Source:UniProtKB/TrEMBL;Acc:B6SUK0]
Zm00001d029390	56.7782	3.55364	3.998	2.38e-05	0.0014866	-	Zm00001d029390
Zm00001d029501	95.5337	16.8243	2.5055	0.0015534	0.045037	-	Zm00001d029501
Zm00001d029558	24.5733	0.88841	4.7897	0.0014922	0.043588	-	Zm00001d029558
Zm00001d029590	972.05	372.032	1.3856	0.0003537	0.014192	-	Sigma factor sigB regulation protein rsbQ [Source:UniProtKB/TrEMBL;Acc:B4FHV3]
Zm00001d029648	233.853	22.6348	3.369	8.63e-08	1.01e-05	-	Zm00001d029648
Zm00001d029722	5.6782	62.082	-3.4507	4.22e-05	0.002493	-	Zm00001d029722
Zm00001d029784	60.425	9.09041	2.7327	0.00046733	0.017981	-	Zm00001d029784
Zm00001d029806	208.712	550.222	-1.3985	0.00055635	0.020612	-	Zm00001d029806
Zm00001d029822	1902.6	850.828	1.161	0.0016836	0.047391	-	Zm00001d029822
Zm00001d029847	174.568	44.4128	1.9747	0.00034931	0.014089	-	Zm00001d029847
Zm00001d029849	131.56	386.119	-1.5533	0.00029305	0.012179	-	Zm00001d029849
Zm00001d029940	512.304	63.4701	3.0129	0.0001434	0.0068671	-	Zm00001d029940
Zm00001d029997	870.693	323.593	1.428	0.00032458	0.013264	-	Zm00001d029997
Zm00001d030090	3479.69	1284.52	1.4377	0.00023202	0.010095	-	Dihydroflavonol-4-reductase [Source:UniProtKB/TrEMBL;Acc:B4F9C1]
Zm00001d030114	233.753	0	Inf	1.74e-24	1.73e-21	-	Zm00001d030114
Zm00001d030339	350.358	2170.85	-2.6314	7.18e-09	1.04e-06	-	Peptidyl-prolyl cis-trans isomerase [Source:UniProtKB/TrEMBL;Acc:B6TB16]
Zm00001d030346	69.3414	515.642	-2.8946	1.83e-10	3.55e-08	-	Zm00001d030346
Zm00001d030551	4.09617	38.65	-3.2381	0.0013748	0.041172	-	Zm00001d030551
Zm00001d030683	55.4338	174.704	-1.6561	0.0012223	0.038118	-	Zm00001d030683
Zm00001d030685	1803.67	377.307	2.2571	2.34e-08	3.15e-06	-	Zm00001d030685
Zm00001d031037	0.527342	199.056	-8.5602	7.63e-21	4.07e-18	-	Zm00001d031037
Zm00001d031113	45.2993	3.82732	3.5651	0.00027413	0.011475	-	Zm00001d031113
Zm00001d031129	64.4357	297.892	-2.2089	2.45e-06	0.00021354	-	Zm00001d031129
Zm00001d031212	320.132	768.657	-1.2637	0.0011757	0.037037	-	Zm00001d031212
Zm00001d031241	347.316	844.367	-1.2816	0.0011545	0.036444	-	Zm00001d031241
Zm00001d031257	1917.79	570.711	1.7486	0.00011079	0.0056091	-	Zm00001d031257
Zm00001d031449	2395.01	481.192	2.3153	2.23e-09	3.64e-07	-	Lipoxygenase [Source:UniProtKB/TrEMBL;Acc:A0A1D6KIW6]
Zm00001d031503	1.01383	342.512	-8.4002	2.85e-18	1.19e-15	-	Zm00001d031503
Zm00001d031555	648.854	2739.83	-2.0781	0.0014754	0.04322	-	Zm00001d031555
Zm00001d031685	80.2521	234.006	-1.5439	0.0011534	0.036444	-	Zm00001d031685
Zm00001d031801	19.5079	122.224	-2.6474	1.19e-05	0.00084134	-	Zm00001d031801
Zm00001d031813	704.087	184.072	1.9355	4e-06	0.00032815	-	Patatin [Source:UniProtKB/TrEMBL;Acc:B4FRJ2]
Zm00001d031878	0.527342	23.4081	-5.4721	0.00090691	0.030006	-	Early nodulin 75 protein [Source:UniProtKB/TrEMBL;Acc:B4FNV9]
Zm00001d031934	317.387	979.43	-1.6257	0.00066537	0.023713	-	Zm00001d031934
Zm00001d031949	120.965	18.0103	2.7477	5.05e-06	0.00039439	-	Zm00001d031949
Zm00001d032016	124.935	0	Inf	9.97e-15	2.86e-12	-	Zm00001d032016
Zm00001d032046	586.356	152.351	1.9444	0.00015311	0.0072422	-	Cytokinin dehydrogenase 10 [Source:UniProtKB/TrEMBL;Acc:B6V8F7]
Zm00001d032069	1198.06	490.127	1.2895	0.0010014	0.032403	-	Zm00001d032069
Zm00001d032090	2.63671	1199.66	-8.8297	4.88e-46	5.03e-42	-	Zm00001d032090
Zm00001d032131	277.21	0	Inf	4.16e-27	4.76e-24	-	Putative uncharacterized protein [Source:UniProtKB/TrEMBL;Acc:B6TIQ1]
Zm00001d032144	54.2974	309.557	-2.5112	1.32e-07	1.49e-05	-	Zm00001d032144
Zm00001d032204	494.455	165.249	1.5812	0.00017082	0.0079344	-	Zm00001d032204
Zm00001d032222	5376.76	1623.55	1.7276	5.16e-06	0.00040204	-	Glycosyltransferase [Source:UniProtKB/TrEMBL;Acc:A0A1D6KPA9]
Zm00001d032458	2595.64	822.941	1.6572	1.56e-05	0.0010584	-	Zm00001d032458
Zm00001d032480	279.661	912.474	-1.7061	1.9e-05	0.0012423	-	Zm00001d032480
Zm00001d032527	86.0158	7.66657	3.4879	2.03e-06	0.00018178	-	Zm00001d032527
Zm00001d032618	878.722	277.145	1.6648	4.57e-05	0.0026613	-	Secretory protein [Source:UniProtKB/TrEMBL;Acc:B6TDW7]
Zm00001d032703	259.741	727.655	-1.4862	0.00020228	0.0090687	-	Zm00001d032703
Zm00001d032790	1935.04	716.519	1.4333	0.00012183	0.0060493	-	Zm00001d032790
Zm00001d032866	2706.99	1172.66	1.2069	0.0012691	0.03898	-	Glycosyltransferase [Source:UniProtKB/TrEMBL;Acc:A0A1D6KUK1]
Zm00001d032932	119.346	19.3429	2.6253	1.26e-05	0.00089129	-	Orphans transcription factor [Source:UniProtKB/TrEMBL;Acc:A0A060D8B5]
Zm00001d032992	360.571	1244.52	-1.7872	4.64e-06	0.00036504	-	Pectinesterase [Source:UniProtKB/TrEMBL;Acc:B6TZE6]
Zm00001d033067	3.04149	104.341	-5.1004	3.04e-10	5.73e-08	-	Potassium transporter [Source:UniProtKB/TrEMBL;Acc:W5UB87]
Zm00001d033079	409.835	1167.47	-1.5103	0.00010988	0.0055813	-	Anther-specific proline-rich protein APG [Source:UniProtKB/TrEMBL;Acc:B6SRX6]
Zm00001d033152	145.219	13.7149	3.4044	3.39e-08	4.44e-06	-	Cytochrome P450 CYP71W7 [Source:UniProtKB/TrEMBL;Acc:B6SZ78]
Zm00001d033181	797.906	306.369	1.3809	0.00036746	0.014649	-	Zm00001d033181
Zm00001d033320	391.026	129.934	1.5895	0.0012415	0.038482	-	Glycosyltransferase [Source:UniProtKB/TrEMBL;Acc:B4FQW1]
Zm00001d033335	82.276	16.3247	2.3334	0.00069447	0.024585	-	Zm00001d033335
Zm00001d033423	58.7726	219.478	-1.9009	0.0017771	0.04926	-	Zm00001d033423
Zm00001d033446	8.39284	218.76	-4.704	2.57e-11	5.45e-09	-	Zinc transporter 10 [Source:UniProtKB/TrEMBL;Acc:B6U8Z3]
Zm00001d033455	1498.32	154.949	3.2735	5.33e-15	1.59e-12	-	Zm00001d033455
Zm00001d033462	17.8442	0	Inf	0.0015781	0.045286	-	Zm00001d033462
Zm00001d033463	405.212	47.3755	3.0965	6.66e-11	1.35e-08	-	Putative auxin-induced protein family [Source:UniProtKB/TrEMBL;Acc:Q6JAC8]
Zm00001d033493	23.6003	152.91	-2.6958	2.38e-06	0.00020905	-	Zm00001d033493
Zm00001d033559	424.894	1158.67	-1.4473	0.00020141	0.009043	-	Zm00001d033559
Zm00001d033623	608.838	1666.56	-1.4527	0.0018093	0.049886	-	Zm00001d033623
Zm00001d033649	374.204	910.32	-1.2825	0.00087093	0.029033	-	Zm00001d033649
Zm00001d033711	95.9166	350.361	-1.869	0.00085622	0.028635	-	Chemocyanin [Source:UniProtKB/TrEMBL;Acc:B6TUK9]
Zm00001d033793	82.3615	360.852	-2.1314	8.75e-06	0.00064114	-	Zm00001d033793
Zm00001d033872	16177.7	7302.03	1.1476	0.0016926	0.047575	-	Zm00001d033872
Zm00001d033907	0	28.2944	#NAME?	4e-05	0.002386	-	Zm00001d033907
Zm00001d034051	4.21874	54.5979	-3.694	4.54e-05	0.0026518	-	Zm00001d034051
Zm00001d034074	606.118	1699.11	-1.4871	8.13e-05	0.0043527	-	Alpha-1,4 glucan phosphorylase [Source:UniProtKB/TrEMBL;Acc:A0A1D6L580]
Zm00001d034095	179.756	30.6543	2.5519	0.00038918	0.015337	-	Zm00001d034095
Zm00001d034160	150.504	429.06	-1.5114	0.000298	0.012341	-	DNA binding protein [Source:UniProtKB/TrEMBL;Acc:B6TAS1]
Zm00001d034172	71.083	8.97532	2.9855	0.00071663	0.025249	-	Zm00001d034172
Zm00001d034208	0.527342	151.28	-8.1643	4.15e-11	8.56e-09	-	Zm00001d034208
Zm00001d034309	822.294	1866.78	-1.1828	0.0015718	0.045286	-	Zm00001d034309
Zm00001d034417	883.086	95.9805	3.2017	1.33e-13	3.39e-11	-	GNAT transcription factor [Source:UniProtKB/TrEMBL;Acc:A0A060D7E5]
Zm00001d034461	1223.09	3312.33	-1.4373	0.00013434	0.0065384	-	Zm00001d034461
Zm00001d034479	3277.94	1276.69	1.3604	0.00041951	0.016427	-	Histone H1 [Source:UniProtKB/TrEMBL;Acc:B6TGH8]
Zm00001d034540	69.4972	0	Inf	0.00032058	0.01317	-	Zm00001d034540
Zm00001d034555	100.165	476.396	-2.2498	3.77e-05	0.0022626	-	Zm00001d034555
Zm00001d034724	13333.2	5959.12	1.1619	0.0011186	0.035529	-	Zm00001d034724
Zm00001d034772	106.649	0	Inf	1.34e-14	3.81e-12	-	Zm00001d034772
Zm00001d034887	1068.11	432.856	1.3031	0.00081527	0.027684	-	Phosphoglycolate phosphatase [Source:UniProtKB/TrEMBL;Acc:B4F880]
Zm00001d034904	64.2722	0.444205	7.1768	4.89e-09	7.24e-07	-	Zm00001d034904
Zm00001d034920	557.695	138.255	2.0121	1.74e-05	0.0011478	-	Zm00001d034920
Zm00001d035081	5853	2354.66	1.3137	0.00027119	0.011383	-	Zm00001d035081
Zm00001d035246	280.786	65.4728	2.1005	1.5e-05	0.0010265	-	Zm00001d035246
Zm00001d035306	151.216	47.899	1.6585	0.0016964	0.047619	-	Zm00001d035306
Zm00001d035321	5128.91	1974.38	1.3772	0.00077406	0.026725	-	Zm00001d035321
Zm00001d035377	101.676	269.269	-1.4051	0.0015796	0.045286	-	Zm00001d035377
Zm00001d035428	11.9208	78.4264	-2.7179	0.0001562	0.0073769	-	Zm00001d035428
Zm00001d035494	624.905	234.803	1.4122	0.00048287	0.018396	-	Glycosyltransferases [Source:UniProtKB/TrEMBL;Acc:A0A1D6LGV0]
Zm00001d035629	83.3753	249.109	-1.5791	0.00072825	0.025456	-	Zm00001d035629
Zm00001d035659	125.028	1570.38	-3.6508	1.83e-06	0.00016465	-	Metallothionein-like protein type 2 [Source:UniProtKB/TrEMBL;Acc:B6T303]
Zm00001d035662	554.074	6646.67	-3.5845	1.08e-06	0.00010345	-	Metallothionein-like protein type 2 [Source:UniProtKB/TrEMBL;Acc:B6T2H9]
Zm00001d035899	76.6425	443.359	-2.5323	1.86e-08	2.54e-06	-	Zm00001d035899
Zm00001d035916	304.435	902.435	-1.5677	6.49e-05	0.0036116	-	Zm00001d035916
Zm00001d035937	7319.92	2478.98	1.5621	2.06e-05	0.0013335	-	Zm00001d035937
Zm00001d036016	892.122	312.016	1.5156	0.00011448	0.0057304	-	Zm00001d036016
Zm00001d036129	233.853	0	Inf	9.39e-18	3.68e-15	-	Zm00001d036129
Zm00001d036175	59.8643	579.376	-3.2747	5.24e-05	0.0029947	-	Zm00001d036175
Zm00001d036206	34.2288	200.5	-2.5503	5.46e-05	0.0031072	-	ATP-dependent 6-phosphofructokinase [Source:UniProtKB/TrEMBL;Acc:A0A1D6LL73]
Zm00001d036364	844.656	260.456	1.6973	0.00083561	0.028159	-	Zm00001d036364
Zm00001d036396	583.478	236.445	1.3032	0.0015751	0.045286	-	Zm00001d036396
Zm00001d036468	87.4155	313.995	-1.8448	7.7e-05	0.0041414	-	Zm00001d036468
Zm00001d036539	221.739	54.3361	2.0289	3.41e-05	0.0020637	-	Zm00001d036539
Zm00001d036643	253.053	69.2131	1.8703	7.23e-05	0.0039496	-	TRAF transcription factor [Source:UniProtKB/TrEMBL;Acc:B4FX65]
Zm00001d036650	1580.05	514.345	1.6192	1.94e-05	0.0012645	-	Zm00001d036650
Zm00001d037005	496.817	91.8002	2.4361	3.41e-08	4.45e-06	-	Zm00001d037005
Zm00001d037057	32.643	154.858	-2.2461	4.04e-05	0.002395	-	Zm00001d037057
Zm00001d037181	846.918	359.543	1.2361	0.0012104	0.037784	-	Zm00001d037181
Zm00001d037468	329.313	1162.37	-1.8195	3.37e-06	0.00028446	-	Zm00001d037468
Zm00001d037492	223.395	629.791	-1.4953	0.00022542	0.0098493	-	Zm00001d037492
Zm00001d037507	135.697	754.307	-2.4748	3.01e-09	4.78e-07	-	Zm00001d037507
Zm00001d037607	364.592	138.081	1.4008	0.0012263	0.038163	-	WRKY transcription factor [Source:UniProtKB/TrEMBL;Acc:C4J6I0]
Zm00001d037646	41.0434	153.597	-1.9039	0.0003483	0.014066	-	Zm00001d037646
Zm00001d037811	198.926	492.641	-1.3083	0.0016666	0.04704	-	Zm00001d037811
Zm00001d037828	163.204	727.159	-2.1556	2.23e-07	2.43e-05	-	Zm00001d037828
Zm00001d037857	4.66437	84.4986	-4.1792	1.61e-07	1.8e-05	-	Zm00001d037857
Zm00001d037860	293.464	108.831	1.4311	0.0012327	0.038287	-	Zm00001d037860
Zm00001d037868	881.32	2772.61	-1.6535	0.00055748	0.020629	-	Zm00001d037868
Zm00001d037969	207.066	51.9327	1.9954	5.98e-05	0.0033711	-	Zm00001d037969
Zm00001d038023	2368.71	626.976	1.9176	3.23e-07	3.39e-05	-	Zm00001d038023
Zm00001d038143	364.566	1026.02	-1.4928	0.00011266	0.0056647	-	Zm00001d038143
Zm00001d038291	431.35	1349.55	-1.6455	1.58e-05	0.0010637	-	Zm00001d038291
Zm00001d038297	66.0101	273.298	-2.0497	0.0013774	0.041183	-	Zm00001d038297
Zm00001d038387	66.9127	423.933	-2.6635	6.79e-09	9.91e-07	-	Zm00001d038387
Zm00001d038438	61.7619	0	Inf	1.27e-09	2.18e-07	-	Zm00001d038438
Zm00001d038522	3865.91	1498.68	1.3671	0.00025948	0.010981	-	Zm00001d038522
Zm00001d038537	264.843	70.5219	1.909	5.19e-05	0.0029782	-	Zm00001d038537
Zm00001d038606	1401.18	223.282	2.6497	3.54e-11	7.44e-09	-	Putative uncharacterized protein [Source:UniProtKB/TrEMBL;Acc:B6SZF2]
Zm00001d038612	241.488	58.7543	2.0392	3.02e-05	0.0018504	-	Zm00001d038612
Zm00001d038651	919.031	4404.68	-2.2609	2.13e-09	3.49e-07	-	Zm00001d038651
Zm00001d038799	383.532	127.824	1.5852	0.00061633	0.022537	-	Zm00001d038799
Zm00001d038851	1211.6	508.324	1.2531	0.0011847	0.037282	-	Nucleosome/chromatin assembly factor group A [Source:UniProtKB/TrEMBL;Acc:Q8L8G5]
Zm00001d038911	8.47455	83.5863	-3.3021	8.1e-06	0.00059731	-	Nonspecific lipid-transfer protein [Source:UniProtKB/TrEMBL;Acc:B4FV12]
Zm00001d038975	393.366	125.243	1.6511	0.00017507	0.0080831	-	Zm00001d038975
Zm00001d039032	57.1384	209.496	-1.8744	0.00018789	0.0085474	-	Zm00001d039032
Zm00001d039077	142.423	536.007	-1.9121	4.96e-06	0.00038875	-	AP2-EREBP transcription factor [Source:UniProtKB/TrEMBL;Acc:B4FPF0]
Zm00001d039103	195.015	43.5721	2.1621	1.92e-05	0.0012558	-	Zm00001d039103
Zm00001d039193	648.534	195.003	1.7337	2.23e-05	0.0014105	-	Zm00001d039193
Zm00001d039240	7.98807	66.2265	-3.0515	0.00011028	0.0055927	-	ABA induced plasma membrane protein PM 19 [Source:UniProtKB/TrEMBL;Acc:B6U3T4]
Zm00001d039337	521.72	150.115	1.7972	0.00015968	0.0074863	-	Zm00001d039337
Zm00001d039377	120.159	550.857	-2.1967	2.81e-07	3e-05	-	Zm00001d039377
Zm00001d039451	3015.29	1252.27	1.2678	0.00064078	0.02305	-	Zm00001d039451
Zm00001d039487	26.6826	432.261	-4.0179	8.88e-16	2.86e-13	-	Zm00001d039487
Zm00001d039506	94.1635	309.585	-1.7171	0.00015244	0.0072349	-	Zm00001d039506
Zm00001d039531	409.717	139.056	1.559	0.00045817	0.017739	-	Zm00001d039531
Zm00001d039682	30.5374	178.258	-2.5453	2.66e-06	0.00022998	-	Zm00001d039682
Zm00001d039713	0.972973	33.2045	-5.0928	0.00013561	0.0065857	-	Zm00001d039713
Zm00001d039770	5.06915	65.1241	-3.6834	1.57e-05	0.0010637	-	Zm00001d039770
Zm00001d039786	5118.9	30197.3	-2.5605	7.83e-12	1.78e-09	-	Zm00001d039786
Zm00001d039866	21.0453	88.0087	-2.0641	0.0017129	0.047997	-	Zm00001d039866
Zm00001d040084	115.825	344.554	-1.5728	0.00032284	0.01321	-	Fructose-bisphosphate aldolase [Source:UniProtKB/TrEMBL;Acc:A0A1D6MN18]
Zm00001d040147	11.4752	67.936	-2.5657	0.00062411	0.022714	-	Zm00001d040147
Zm00001d040246	240.871	717.796	-1.5753	0.00077336	0.026725	-	Zm00001d040246
Zm00001d040264	1900.25	822.34	1.2084	0.00092034	0.030256	-	Zm00001d040264
Zm00001d040266	67.0353	282.571	-2.0756	3.29e-05	0.0020004	-	Zm00001d040266
Zm00001d040627	10.4205	130.45	-3.646	3.04e-08	4.06e-06	-	Zm00001d040627
Zm00001d040705	181.869	58.1754	1.6444	0.00082312	0.027859	-	Peroxidase [Source:UniProtKB/TrEMBL;Acc:B4FU88]
Zm00001d040733	207.041	678.939	-1.7134	2.29e-05	0.0014352	-	Zm00001d040733
Zm00001d041067	1071.79	4229.3	-1.9804	2.22e-05	0.001408	-	Bidirectional sugar transporter SWEET [Source:UniProtKB/TrEMBL;Acc:B4FTH1]
Zm00001d041082	484.528	52.579	3.204	1.42e-05	0.0009739	-	Zm00001d041082
Zm00001d041229	938.198	2566.46	-1.4518	0.00010013	0.0052061	-	Zm00001d041229
Zm00001d041298	6.52861	47.4429	-2.8613	0.0012402	0.038481	-	Zm00001d041298
Zm00001d041308	1348.07	559.662	1.2683	0.00065892	0.023538	-	Zm00001d041308
Zm00001d041389	0	46.4198	#NAME?	2.74e-07	2.95e-05	-	Zm00001d041389
Zm00001d041430	283.861	98.5545	1.5262	0.00081502	0.027684	-	Calmodulin [Source:UniProtKB/TrEMBL;Acc:B6SNK9]
Zm00001d041453	54.8656	179.567	-1.7105	0.00075759	0.026274	-	Zm00001d041453
Zm00001d041663	163.256	12.8265	3.6699	1.45e-09	2.42e-07	-	Zm00001d041663
Zm00001d041712	39.413	256.76	-2.7037	3.84e-06	0.00031786	-	Zm00001d041712
Zm00001d041730	19.0585	83.4038	-2.1297	0.0012634	0.038927	-	Zm00001d041730
Zm00001d041814	596.395	1446.11	-1.2778	0.00093795	0.030672	-	Zm00001d041814
Zm00001d041824	3398.54	1339.83	1.3429	0.00020969	0.0093468	-	Zm00001d041824
Zm00001d041886	62.1999	0	Inf	6.42e-05	0.0035876	-	NAC transcription factor [Source:UniProtKB/TrEMBL;Acc:A0A060D2T5]
Zm00001d042008	130.695	0	Inf	7.15e-17	2.63e-14	-	Zm00001d042008
Zm00001d042044	852.823	204.835	2.0578	3.31e-07	3.47e-05	-	Zm00001d042044
Zm00001d042098	100.328	23.773	2.0773	0.00080251	0.027478	-	Zm00001d042098
Zm00001d042144	452.999	153.597	1.5604	0.00022137	0.0097549	-	Zm00001d042144
Zm00001d042225	1171.32	2878.95	-1.2974	0.00042334	0.016535	-	Zm00001d042225
Zm00001d042260	1083.47	70.8075	3.9356	1.09e-11	2.44e-09	-	Zm00001d042260
Zm00001d042293	147.521	37.3609	1.9813	0.0009123	0.03012	-	Zm00001d042293
Zm00001d042345	152.94	574.452	-1.9092	4.68e-06	0.00036771	-	Auxin efflux carrier component [Source:UniProtKB/TrEMBL;Acc:I3RWV5]
Zm00001d042420	1194.88	4558.78	-1.9318	0.00041821	0.016397	-	Zm00001d042420
Zm00001d042463	73.809	266.798	-1.8539	6.93e-05	0.0038227	-	Zm00001d042463
Zm00001d042481	525.056	1310.42	-1.3195	0.00055459	0.020571	-	Zm00001d042481
Zm00001d042514	118.176	0.444205	8.0555	1.51e-14	4.24e-12	-	Zm00001d042514
Zm00001d042600	627.029	1805.48	-1.5258	6.73e-05	0.0037314	-	Zm00001d042600
Zm00001d042684	4.5418	43.2984	-3.253	0.0008448	0.028337	-	Zm00001d042684
Zm00001d042692	475.646	10.5935	5.4886	2.3e-23	2.1e-20	-	Zm00001d042692
Zm00001d042740	251.415	55.1214	2.1894	6.23e-06	0.00047852	-	Zm00001d042740
Zm00001d042749	457.705	87.1041	2.3936	1.14e-07	1.29e-05	-	Zm00001d042749
Zm00001d042750	330.267	108.2	1.6099	0.00043298	0.016869	-	Zm00001d042750
Zm00001d042829	0	19.0573	#NAME?	0.0011096	0.035279	-	Zm00001d042829
Zm00001d042867	2280.93	21659.4	-3.2473	1.37e-09	2.31e-07	-	Zm00001d042867
Zm00001d042880	10.8699	63.2757	-2.5413	0.00068201	0.024223	-	Zm00001d042880
Zm00001d042888	322.565	77.1415	2.064	6.27e-06	0.00048045	-	Zm00001d042888
Zm00001d042909	2926.89	1274.48	1.1995	0.00093148	0.030525	-	Elicitor-responsive protein 1 [Source:UniProtKB/TrEMBL;Acc:B6T411]
Zm00001d042972	25.7914	119.175	-2.2081	0.00022347	0.0097918	-	Zm00001d042972
Zm00001d042974	394.572	145.569	1.4386	0.0006135	0.02246	-	Zm00001d042974
Zm00001d042993	751.369	265.259	1.5021	0.000195	0.0088191	-	Zm00001d042993
Zm00001d043024	6.85167	49.7432	-2.86	0.0010428	0.033535	-	Zm00001d043024
Zm00001d043025	264.472	93.8311	1.495	0.00077302	0.026725	-	Zm00001d043025
Zm00001d043094	300.528	89.1946	1.7525	8.38e-05	0.0044414	-	Zm00001d043094
Zm00001d043144	664.408	1570.58	-1.2412	0.00078238	0.026952	-	Zm00001d043144
Zm00001d043234	11.1521	98.6338	-3.1448	4.18e-06	0.00033784	-	Zm00001d043234
Zm00001d043252	79.0045	227.422	-1.5254	0.0011944	0.037512	-	Serine/threonine-protein kinase [Source:UniProtKB/TrEMBL;Acc:C0P6F5]
Zm00001d043325	1091.01	473.787	1.2034	0.0016211	0.046263	-	Zm00001d043325
Zm00001d043344	452.012	168.342	1.425	0.0010635	0.034058	-	Glutathione S-transferase IV [Source:UniProtKB/TrEMBL;Acc:B6SZY7]
Zm00001d043374	232.806	597.737	-1.3604	0.0016404	0.046692	-	Peptide transporter PTR2 [Source:UniProtKB/TrEMBL;Acc:B6UEH6]
Zm00001d043512	380.159	110.005	1.789	9.03e-05	0.004753	-	Zm00001d043512
Zm00001d043538	372.588	2270.08	-2.6071	2.45e-11	5.22e-09	-	BURP4 [Source:UniProtKB/TrEMBL;Acc:B4FTF3]
Zm00001d043543	611.298	1666.77	-1.4471	0.00093655	0.030658	-	Zm00001d043543
Zm00001d043613	3388.32	9564.78	-1.4972	0.0012548	0.038818	-	Zm00001d043613
Zm00001d043619	2224.09	5164.98	-1.2155	0.000971	0.031586	-	Zm00001d043619
Zm00001d043652	1747.01	4161.4	-1.2522	0.00069459	0.024585	-	Zm00001d043652
Zm00001d043663	127.865	30.5077	2.0674	0.00015972	0.0074863	-	Zm00001d043663
Zm00001d043734	189.003	509.224	-1.4299	0.00065125	0.023291	-	Zm00001d043734
Zm00001d043898	260.391	52.6386	2.3065	2e-06	0.00017933	-	Zm00001d043898
Zm00001d043968	260.476	39.5384	2.7198	6.33e-08	7.59e-06	-	MYB-related transcription factor [Source:UniProtKB/TrEMBL;Acc:A0A060D2G0]
Zm00001d044120	56.8229	203.364	-1.8395	0.00017806	0.0081726	-	Cytochrome P450 CYP51H12 [Source:UniProtKB/TrEMBL;Acc:B4FKF8]
Zm00001d044156	3189.46	1012.68	1.6551	9.79e-06	0.00070447	-	Zm00001d044156
Zm00001d044157	1787.52	467.977	1.9334	7.77e-07	7.55e-05	-	Cytochrome P450 CYP72A123 [Source:UniProtKB/TrEMBL;Acc:B6SXS5]
Zm00001d044321	0	33.6487	#NAME?	7.33e-06	0.00054882	-	Zm00001d044321
Zm00001d044566	52.2364	237.615	-2.1855	7.67e-06	0.00057066	-	Zm00001d044566
Zm00001d044671	91.6494	323.395	-1.8191	6.93e-05	0.0038227	-	Zm00001d044671
Zm00001d044686	2678.22	231.622	3.5314	4.72e-08	5.89e-06	-	Non-specific lipid-transfer protein [Source:UniProtKB/TrEMBL;Acc:A0A1D6NQQ1]
Zm00001d044734	499.383	150.4	1.7313	2.65e-05	0.0016404	-	Zm00001d044734
Zm00001d044765	212.317	40.7798	2.3803	0.00053571	0.020015	-	Benzoate carboxyl methyltransferase [Source:UniProtKB/TrEMBL;Acc:K7V8Z2]
Zm00001d044777	210.342	12.4855	4.0744	1.95e-12	4.64e-10	-	Zm00001d044777
Zm00001d044806	105.03	16.3921	2.6797	2.54e-05	0.0015816	-	Zm00001d044806
Zm00001d044857	216.031	546.724	-1.3396	0.0010545	0.033839	-	Putative AP2/EREBP transcription factor superfamily protein [Source:UniProtKB/TrEMBL;Acc:K7W500]
Zm00001d044975	126.149	16.6658	2.9202	0.00016823	0.0078496	-	Colored aleurone1 [Source:UniProtKB/TrEMBL;Acc:K7V9H9]
Zm00001d045051	2347.09	986.375	1.2507	0.00072382	0.02541	-	Putative RING zinc finger domain superfamily protein [Source:UniProtKB/TrEMBL;Acc:K7V9U5]
Zm00001d045144	1928.79	834.246	1.2092	0.0010355	0.033367	-	Thylakoid assembly5 [Source:UniProtKB/TrEMBL;Acc:K7V6D4]
Zm00001d045261	2077.42	5380.48	-1.3729	0.00020577	0.0091856	-	Starch synthase, chloroplastic/amyloplastic [Source:UniProtKB/TrEMBL;Acc:A0A1D6NUU8]
Zm00001d045320	1813.85	4466.24	-1.3	0.00046565	0.017939	-	Zm00001d045320
Zm00001d045498	148.624	32.1098	2.2106	0.00010236	0.0052601	-	Zm00001d045498
Zm00001d045544	13826.2	6340.4	1.1248	0.0015604	0.045112	-	Putative TCP-1/cpn60 chaperonin family protein [Source:UniProtKB/TrEMBL;Acc:C0PHP3]
Zm00001d045567	53.8147	377.62	-2.8109	1.95e-09	3.21e-07	-	Zm00001d045567
Zm00001d045572	0	22.0636	#NAME?	0.00033961	0.013787	-	WAT1-related protein [Source:UniProtKB/TrEMBL;Acc:A0A1D6NX12]
Zm00001d045759	19.5041	121.027	-2.6335	0.00012691	0.0062416	-	Zm00001d045759
Zm00001d045876	0.527342	154.017	-8.1901	1.64e-17	6.36e-15	-	Zm00001d045876
Zm00001d045877	24.2093	96.4009	-1.9935	0.0012701	0.03898	-	Zm00001d045877
Zm00001d045972	1315.24	574.257	1.1956	0.0015562	0.045075	-	Glycosyltransferase [Source:UniProtKB/TrEMBL;Acc:K7VUB5]
Zm00001d046066	124.861	34.8781	1.8399	0.0014534	0.042903	-	Zm00001d046066
Zm00001d046127	5.59649	73.3815	-3.7128	4.56e-06	0.00036068	-	Zm00001d046127
Zm00001d046129	35.0346	0	Inf	3.97e-06	0.00032621	-	Zm00001d046129
Zm00001d046134	10.7473	58.5719	-2.4462	0.0015214	0.044233	-	Putative O-glycosyl hydrolase family 17 protein [Source:UniProtKB/TrEMBL;Acc:B4FA15]
Zm00001d046342	457.716	98.3363	2.2187	6.45e-07	6.38e-05	-	Zm00001d046342
Zm00001d046625	229.76	577.93	-1.3308	0.0013487	0.04062	-	Calcium-binding protein [Source:UniProtKB/TrEMBL;Acc:B6SKP7]
Zm00001d046634	34.7933	3.29189	3.4018	0.0017695	0.049108	-	Zm00001d046634
Zm00001d046667	14.2345	75.1941	-2.4012	0.00091948	0.030256	-	Zm00001d046667
Zm00001d046751	15.1257	80.3063	-2.4085	0.00047597	0.018223	-	BZIP transcription factor [Source:UniProtKB/TrEMBL;Acc:B8A0F0]
Zm00001d046781	10.8291	62.2167	-2.5224	0.00083918	0.028217	-	MLO-like protein [Source:UniProtKB/TrEMBL;Acc:A0A1D6P4Y9]
Zm00001d046923	1395.28	458.383	1.6059	2.25e-05	0.0014192	-	D-3-phosphoglycerate dehydrogenase [Source:UniProtKB/TrEMBL;Acc:B4G011]
Zm00001d046947	58.2748	331.565	-2.5083	8.71e-08	1.01e-05	-	G2-like transcription factor [Source:UniProtKB/TrEMBL;Acc:K7VBX7]
Zm00001d046961	2459.97	764.39	1.6863	7.52e-06	0.00056154	-	VQ motif family protein [Source:UniProtKB/TrEMBL;Acc:B6SNC5]
Zm00001d047192	223.774	37.3771	2.5818	2.07e-07	2.27e-05	-	Zm00001d047192
Zm00001d047276	62.4042	213.628	-1.7754	0.00035591	0.014247	-	Brittle stalk-2 [Source:UniProtKB/TrEMBL;Acc:A0EJ90]
Zm00001d047334	31.6738	2.58593	3.6145	0.0015177	0.04421	-	Zm00001d047334
Zm00001d047523	107.172	20.6875	2.3731	0.0012955	0.039368	-	Zm00001d047523
Zm00001d047581	13561.8	5905.69	1.1994	0.00085886	0.028692	-	Zm00001d047581
Zm00001d047634	4988.65	2089.67	1.2554	0.00060954	0.022342	-	ATP-dependent Clp protease proteolytic subunit [Source:UniProtKB/TrEMBL;Acc:A0A1D6PC01]
Zm00001d047710	427.781	1236.86	-1.5317	7.19e-05	0.0039392	-	Zm00001d047710
Zm00001d047801	394.662	110.036	1.8426	3.09e-05	0.001886	-	Zm00001d047801
Zm00001d047829	78.7889	16.745	2.2343	0.00090882	0.030037	-	Zm00001d047829
Zm00001d047837	376.84	2311.16	-2.6166	7.67e-05	0.0041414	-	Zm00001d047837
Zm00001d047840	66.1849	220.752	-1.7378	0.0014339	0.042448	-	Zm00001d047840
Zm00001d047981	250.787	1179.23	-2.2333	1.73e-08	2.39e-06	-	Glutamate decarboxylase [Source:UniProtKB/TrEMBL;Acc:C0HHT5]
Zm00001d048019	206.71	25.0144	3.0468	5.32e-07	5.4e-05	-	Zm00001d048019
Zm00001d048087	194.455	26.0418	2.9005	5.11e-08	6.32e-06	-	Zm00001d048087
Zm00001d048110	95.6192	22.4404	2.0912	0.00082646	0.027911	-	Zm00001d048110
Zm00001d048393	20.0761	88.7582	-2.1444	0.00080606	0.027492	-	Zm00001d048393
Zm00001d048451	1023.82	419.442	1.2874	0.0012251	0.038163	-	Selenium-binding protein-like protein [Source:UniProtKB/TrEMBL;Acc:B4FKB9]
Zm00001d048527	176.573	445.231	-1.3343	0.0014534	0.042903	-	Zm00001d048527
Zm00001d048561	4420.88	1906.05	1.2137	0.0011466	0.036268	-	p-protein [Source:UniProtKB/TrEMBL;Acc:K7W3S8]
Zm00001d048583	559.519	1519.34	-1.4412	0.00017318	0.008008	-	Uncoupling protein [Source:UniProtKB/TrEMBL;Acc:Q8S4C4]
Zm00001d048635	344.408	82.5274	2.0612	6.4e-06	0.00048876	-	Zm00001d048635
Zm00001d048819	106.485	18.2482	2.5448	5.89e-05	0.0033407	-	Putative cytochrome P450 superfamily protein [Source:UniProtKB/TrEMBL;Acc:K7UPI7]
Zm00001d048949	10719.8	2863.17	1.9046	4.12e-06	0.00033479	-	Zm00001d048949
Zm00001d048950	7659.5	1843	2.0552	7.98e-06	0.0005903	-	Win2 [Source:UniProtKB/TrEMBL;Acc:B4FS23]
Zm00001d048990	69.1409	2.93891	4.5562	3.78e-07	3.91e-05	-	Zm00001d048990
Zm00001d048991	435.642	77.058	2.4991	4.27e-08	5.44e-06	-	Zm00001d048991
Zm00001d049023	3.65054	277.891	-6.2503	3.02e-21	1.65e-18	-	Zm00001d049023
Zm00001d049028	796.177	96.3174	3.0472	0.00096335	0.03137	-	Chitinase 1 [Source:UniProtKB/TrEMBL;Acc:B4FBN8]
Zm00001d049059	1404.88	3452.9	-1.2974	0.0010199	0.032934	-	Alcohol dehydrogenase 2 [Source:UniProtKB/TrEMBL;Acc:B6SUD1]
Zm00001d049109	0	33.6368	#NAME?	6.87e-06	0.00051846	-	Zm00001d049109
Zm00001d049113	9.61095	362.414	-5.2368	3.47e-20	1.73e-17	-	Vignain [Source:UniProtKB/TrEMBL;Acc:B4FZ79]
Zm00001d049179	1429.54	4647.81	-1.701	6.49e-06	0.00049303	-	Zm00001d049179
Zm00001d049289	11.0296	79.6004	-2.8514	8.22e-05	0.0043894	-	Zm00001d049289
Zm00001d049441	48.0547	261.297	-2.4429	6.63e-07	6.53e-05	-	Zm00001d049441
Zm00001d049541	1199.83	4138.08	-1.7861	2.82e-06	0.00024095	-	Brown midrib3 [Source:UniProtKB/TrEMBL;Acc:Q6VWG3]
Zm00001d049571	65.9398	224.206	-1.7656	0.00022309	0.0097918	-	Zm00001d049571
Zm00001d049640	1851.71	718.827	1.3651	0.00033448	0.013615	-	Zm00001d049640
Zm00001d049676	93.1944	435.637	-2.2248	4.5e-07	4.59e-05	-	Zm00001d049676
Zm00001d049743	1175.76	424.151	1.4709	0.00052171	0.019658	-	PDE191 [Source:UniProtKB/TrEMBL;Acc:B6TBV3]
Zm00001d049805	123.242	495.148	-2.0064	2.36e-06	0.00020843	-	Zm00001d049805
Zm00001d049821	493.237	173.348	1.5086	0.00032133	0.013183	-	Zm00001d049821
Zm00001d049966	372.034	865.478	-1.2181	0.0015789	0.045286	-	Zm00001d049966
Zm00001d050062	0	37.123	#NAME?	2.42e-06	0.00021202	-	Zm00001d050062
Zm00001d050074	79.9442	281.818	-1.8177	0.00094917	0.030973	-	Zm00001d050074
Zm00001d050158	7.01509	81.754	-3.5428	3.94e-06	0.00032462	-	Zm00001d050158
Zm00001d050161	16.5481	90.3406	-2.4487	0.00016885	0.0078665	-	Zm00001d050161
Zm00001d050247	280.893	75.571	1.8941	7.58e-05	0.0041043	-	Putative WRKY DNA-binding domain superfamily protein [Source:UniProtKB/TrEMBL;Acc:B6SQR1]
Zm00001d050250	1.58203	99.9187	-5.9809	2.94e-06	0.00025053	-	Zm00001d050250
Zm00001d050462	107.949	26.0972	2.0484	0.00059245	0.021819	-	Zm00001d050462
Zm00001d050466	6.16469	50.6316	-3.0379	0.00044785	0.017427	-	Zm00001d050466
Zm00001d050635	508.942	2875.46	-2.4982	9.61e-11	1.92e-08	-	Peptidyl-prolyl cis-trans isomerase [Source:UniProtKB/TrEMBL;Acc:K7TWV7]
Zm00001d050712	3.44626	36.5757	-3.4078	0.0012594	0.038874	-	Zm00001d050712
Zm00001d050775	1.05468	203.193	-7.5899	4.07e-20	2e-17	-	Zm00001d050775
Zm00001d050864	1346.19	313.837	2.1008	4.29e-08	5.44e-06	-	Zm00001d050864
Zm00001d050909	0	36.4529	#NAME?	0.00046383	0.017891	-	Zm00001d050909
Zm00001d050917	598.794	1508.48	-1.333	0.00048022	0.018318	-	Zm00001d050917
Zm00001d050944	170.435	709.407	-2.0574	6.96e-07	6.83e-05	-	Zm00001d050944
Zm00001d051015	120.486	329.582	-1.4518	0.00080298	0.027478	-	Zm00001d051015
Zm00001d051016	15.4526	159.633	-3.3688	1.55e-08	2.15e-06	-	Zm00001d051016
Zm00001d051055	503.078	1538.21	-1.6124	2.85e-05	0.0017584	-	Zm00001d051055
Zm00001d051104	0	37.7616	#NAME?	2.15e-06	0.00019154	-	Zm00001d051104
Zm00001d051130	497.375	136.134	1.8693	0.0016152	0.046136	-	Long-chain-alcohol oxidase [Source:UniProtKB/TrEMBL;Acc:C0P3J6]
Zm00001d051166	71.7776	13.8854	2.37	0.00099986	0.032388	-	Phenylalanine ammonia-lyase [Source:UniProtKB/TrEMBL;Acc:C0PL14]
Zm00001d051174	505.615	161.219	1.649	0.0002127	0.0094266	PIP2-3	Plasma membrane intrinsic protein2 [Source:UniProtKB/TrEMBL;Acc:C4JAU6]
Zm00001d051194	7013.51	19820.4	-1.4988	5.23e-05	0.0029947	-	Arginine decarboxylase [Source:UniProtKB/TrEMBL;Acc:B7ZYV4]
Zm00001d051214	208.778	511.489	-1.2927	0.0014905	0.043582	-	Nitrilase 4 isoform 1 [Source:UniProtKB/TrEMBL;Acc:B4FQE2]
Zm00001d051252	1.54117	40.6886	-4.7225	4.34e-05	0.0025545	-	Zm00001d051252
Zm00001d051323	260.227	89.5434	1.5391	0.0010367	0.033371	-	Zm00001d051323
Zm00001d051362	372.488	2228.08	-2.5805	8.55e-11	1.73e-08	TIP2-1	Aquaporin TIP2-1 [Source:UniProtKB/TrEMBL;Acc:K7UHP7]
Zm00001d051374	193.4	44.9601	2.1049	4.66e-05	0.0027039	-	Zm00001d051374
Zm00001d051424	130.539	816.41	-2.6448	3.74e-10	6.97e-08	-	Zm00001d051424
Zm00001d051480	0	58.6512	#NAME?	3.39e-09	5.32e-07	-	Zm00001d051480
Zm00001d051501	6.85545	68.2532	-3.3156	8.24e-05	0.0043938	-	Putative RING zinc finger domain superfamily protein [Source:UniProtKB/TrEMBL;Acc:B4FPP9]
Zm00001d051596	24.3765	135.015	-2.4696	1.65e-05	0.0010974	-	Zm00001d051596
Zm00001d051608	17.0717	442.752	-4.6968	2.97e-19	1.33e-16	-	Adenylyltransferase and sulfurtransferase MOCS3 [Source:UniProtKB/TrEMBL;Acc:A0A1D6Q8E9]
Zm00001d051609	9.77437	311.548	-4.9943	5.45e-18	2.19e-15	-	Oxygen-regulated protein [Source:UniProtKB/TrEMBL;Acc:K7UIJ8]
Zm00001d051617	0	202.713	#NAME?	2.62e-22	1.93e-19	-	Zm00001d051617
Zm00001d051634	518.479	1502.35	-1.5349	7.32e-05	0.0039788	-	Zm00001d051634
Zm00001d051653	106.393	636.367	-2.5805	3.25e-08	4.29e-06	-	Putative uncharacterized protein [Source:UniProtKB/TrEMBL;Acc:B6U056]
Zm00001d051659	3.08234	282.595	-6.5186	2.93e-21	1.65e-18	-	Zm00001d051659
Zm00001d051670	57.0566	177.12	-1.6343	0.0013512	0.04062	-	Zm00001d051670
Zm00001d051681	18.171	102.089	-2.4901	0.00014116	0.0067911	-	Alpha-6-galactosyltransferase [Source:UniProtKB/TrEMBL;Acc:Q5TIM9]
Zm00001d051713	351.981	1006.08	-1.5152	8.34e-05	0.0044308	-	Zm00001d051713
Zm00001d051733	36.8988	140.203	-1.9259	0.00063827	0.023013	-	Zm00001d051733
Zm00001d051779	15.6531	100.058	-2.6763	4.03e-05	0.002395	-	Zm00001d051779
Zm00001d051788	287.17	737.119	-1.36	0.0006466	0.023178	-	Putative MYB DNA-binding domain superfamily protein [Source:UniProtKB/TrEMBL;Acc:K7U498]
Zm00001d051794	0	130.986	#NAME?	1.14e-16	4.11e-14	-	Zm00001d051794
Zm00001d051800	0	49.1524	#NAME?	6.23e-08	7.49e-06	-	Caleosin protein [Source:UniProtKB/TrEMBL;Acc:B6TIA8]
Zm00001d051850	43.1082	171.67	-1.9936	0.00026755	0.011276	-	Signal peptidase I [Source:UniProtKB/TrEMBL;Acc:A0A1D6QAA1]
Zm00001d051851	2661.04	949.189	1.4872	6.25e-05	0.0035131	-	Zm00001d051851
Zm00001d051917	0.486487	55.4863	-6.8336	7.77e-08	9.18e-06	-	Zm00001d051917
Zm00001d051928	837.325	304.802	1.4579	0.00032606	0.013307	-	Putative glutathione S-transferase family protein [Source:UniProtKB/TrEMBL;Acc:B4FQK3]
Zm00001d052034	561.888	6981.35	-3.6352	7.3e-06	0.00054799	-	Thioredoxin H-type 5 [Source:UniProtKB/TrEMBL;Acc:K7V0C3]
Zm00001d052136	39.9441	134.48	-1.7513	0.0012528	0.038795	-	Acc oxidase [Source:UniProtKB/TrEMBL;Acc:Q6JN54]
Zm00001d052148	4.86487	106.003	-4.4456	4.6e-09	6.87e-07	-	SAUR12-auxin-responsive SAUR family member [Source:UniProtKB/TrEMBL;Acc:K7U5M1]
Zm00001d052220	133.176	35.255	1.9174	0.00064069	0.02305	-	Zm00001d052220
Zm00001d052221	4.90572	50.5762	-3.3659	0.00025433	0.010807	-	Zm00001d052221
Zm00001d052245	92.9046	632.412	-2.767	1.95e-10	3.74e-08	-	Zm00001d052245
Zm00001d052261	291.638	737.987	-1.3394	0.00064339	0.02309	-	Zm00001d052261
Zm00001d052371	87.8839	362.327	-2.0436	5.36e-06	0.00041697	-	Zm00001d052371
Zm00001d052410	621.225	220.712	1.493	0.00026194	0.01107	-	Zm00001d052410
Zm00001d052564	120.727	33.4782	1.8505	0.0012604	0.038874	-	Zm00001d052564
Zm00001d052640	510.297	193.778	1.3969	0.00052521	0.0197	-	Putative RING zinc finger domain superfamily protein [Source:UniProtKB/TrEMBL;Acc:K7V2L1]
Zm00001d052661	568.509	120.162	2.2422	2.12e-07	2.33e-05	-	Zm00001d052661
Zm00001d052769	1853.02	5744.46	-1.6323	8.27e-05	0.004404	-	Zm00001d052769
Zm00001d052809	4973.83	1869.04	1.4121	0.00012966	0.0063566	-	Zm00001d052809
Zm00001d052813	351.153	61.8518	2.5052	1.19e-07	1.34e-05	-	Zm00001d052813
Zm00001d052864	451.392	144.403	1.6443	0.00012474	0.0061543	-	Fasciclin-like arabinogalactan protein 7 [Source:UniProtKB/TrEMBL;Acc:B6SHU5]
Zm00001d052902	204.727	7.91639	4.6927	1.13e-06	0.00010737	-	Zm00001d052902
Zm00001d052906	64.8404	7.65464	3.0825	0.00011447	0.0057304	-	Zm00001d052906
Zm00001d052952	709.61	227.898	1.6386	6.29e-05	0.0035189	-	Zm00001d052952
Zm00001d053446	100.815	560.93	-2.4761	9.4e-09	1.34e-06	-	Zm00001d053446
Zm00001d053514	187.216	35.608	2.3944	0.00084111	0.028252	-	Glycosyltransferase [Source:UniProtKB/TrEMBL;Acc:K7UQJ0]
Zm00001d053563	132.403	382.902	-1.532	0.00034662	0.014035	-	Zm00001d053563
Zm00001d053652	462.711	75.6383	2.6129	4.51e-09	6.77e-07	-	Peptidylprolyl isomerase [Source:UniProtKB/TrEMBL;Acc:A0A1D6QR81]
Zm00001d053667	404.099	85.8628	2.2346	0.0015663	0.045241	-	Zm00001d053667
Zm00001d053761	20.9673	107.978	-2.3645	0.00073999	0.025721	-	Zm00001d053761
Zm00001d053839	37.1107	200.944	-2.4369	0.00017711	0.0081459	-	Peroxidase [Source:UniProtKB/TrEMBL;Acc:A0A1D6QSQ3]
Zm00001d053876	97.684	15.583	2.6482	0.00014952	0.0071159	-	Zm00001d053876
Zm00001d053888	2.59586	151.383	-5.8659	4.31e-12	9.88e-10	-	Zm00001d053888
Zm00001d053895	21.413	108.192	-2.337	0.00015249	0.0072349	-	Putative HLH DNA-binding domain superfamily protein [Source:UniProtKB/TrEMBL;Acc:C0PHL6]
Zm00001d053897	1230.47	3331.68	-1.437	0.00010363	0.0053163	-	Putative ubiquitin-conjugating enzyme family [Source:UniProtKB/TrEMBL;Acc:B4FSG6]
Zm00001d053926	2643.67	791.931	1.7391	4.1e-06	0.00033446	-	EF-hand Ca2+-binding protein CCD1 [Source:UniProtKB/TrEMBL;Acc:B6T0B8]
Zm00001d053965	115.903	646.261	-2.4792	0.0014316	0.042421	-	Zm00001d053965
Zm00001d054015	1282.27	486.713	1.3976	0.0014087	0.041822	-	Peptidylprolyl isomerase [Source:UniProtKB/TrEMBL;Acc:A0A1D6QUK7]
Zm00001d054044	12274.4	4323.14	1.5055	3.11e-05	0.0019004	-	Catalase [Source:UniProtKB/TrEMBL;Acc:K7UGM3]
