# Supplementary material for: Comparative transcriptome analysis of differentially expressed genes related to the physiological changes of yellow-green leaf mutant of maize
Source: PeerJ. 2021 Feb 16;9:e10567. doi: 10.7717/peerj.10567 (PMC7894110; doi:10.7717/peerj.10567)
Supplement: Supplemental Information 3 [file peerj-09-10567-s003.xlsx]

## Sheet: Table S3
GO_accession	Description	Term_type	Over_represented_pValue	Corrected_pValue	DEG_item	DEG_list	Bg_item	Bg_list	Up	Up_Gene_names	Down	Down_Gene_names
GO:0016758	transferase activity, transferring hexosyl groups	molecular_function	0.00011548	0.39868	34	783	587	26932	22	Zm00001d047801,Zm00001d016435,Zm00001d004366,Zm00001d052813,Zm00001d016429,Zm00001d015623,Zm00001d007486,Zm00001d032222,Zm00001d012335,Zm00001d033320,Zm00001d042514,Zm00001d016103,Zm00001d016896,Zm00001d035494,Zm00001d002753,Zm00001d015256,Zm00001d007869,Zm00001d016417,Zm00001d032866,Zm00001d053514,Zm00001d042740,Zm00001d024476	12	Zm00001d013052,Zm00001d046127,Zm00001d044566,Zm00001d002256,Zm00001d013672,Zm00001d002970,Zm00001d016424,Zm00001d019479,Zm00001d003817,Zm00001d034074,Zm00001d045261,Zm00001d024071
GO:0016829	lyase activity	molecular_function	0.00012865	0.39868	28	783	440	26932	14	Zm00001d028083,Zm00001d024208,Zm00001d024211,Zm00001d048561,Zm00001d015724,Zm00001d051166,Zm00001d015976,Zm00001d029648,Zm00001d008623,Zm00001d008700,Zm00001d025333,Zm00001d016963,Zm00001d015129,Zm00001d041082	14	Zm00001d017416,Zm00001d013557,Zm00001d003522,Zm00001d051194,Zm00001d028140,Zm00001d020306,Zm00001d047981,Zm00001d016801,Zm00001d040084,Zm00001d035899,Zm00001d034461,GRMZM5G815453,Zm00001d000279,Zm00001d044321
GO:0006779	porphyrin-containing compound biosynthetic process	biological_process	0.00027154	0.47745	7	783	44	26932	4	Zm00001d002358,Zm00001d028083,Zm00001d008203,Novel01160	3	Zm00001d044321,Zm00001d013013,Zm00001d026277
GO:0055114	oxidation-reduction process	biological_process	0.00030813	0.47745	87	783	2024	26932	47	Zm00001d024843,Zm00001d006069,Zm00001d017418,Zm00001d002358,Zm00001d003524,Zm00001d025288,Zm00001d013231,Zm00001d048819,Zm00001d046342,Zm00001d004978,Zm00001d032046,Zm00001d014958,Zm00001d054044,Zm00001d037005,Zm00001d044156,Zm00001d029390,Zm00001d002937,Zm00001d018181,Zm00001d001960,Zm00001d008427,Zm00001d008203,Zm00001d051130,Zm00001d031449,Zm00001d014134,Zm00001d040705,Zm00001d023759,Zm00001d0…	40	Zm00001d026154,Zm00001d033623,Zm00001d002837,Zm00001d042600,Zm00001d023437,Zm00001d043619,Novel00789,Zm00001d017598,Zm00001d044120,Zm00001d001820,Zm00001d019850,Zm00001d025170,Zm00001d026277,Zm00001d052034,Zm00001d025533,Zm00001d025545,Zm00001d023873,Zm00001d043543,Zm00001d050775,Novel00326,Zm00001d016619,Zm00001d052769,Zm00001d005624,Zm00001d038291,Zm00001d014204,Zm00001d031555,Zm00001d014772,Zm…
GO:0042026	protein refolding	biological_process	0.00057619	0.712	4	783	14	26932	3	Zm00001d035937,Zm00001d000399,Zm00001d045544	1	Zm00001d051252
GO:0006778	porphyrin-containing compound metabolic process	biological_process	0.00069363	0.712	8	783	66	26932	4	Zm00001d008203,Novel01160,Zm00001d028083,Zm00001d002358	4	Zm00001d026277,Zm00001d031934,Zm00001d013013,Zm00001d044321
GO:0033014	tetrapyrrole biosynthetic process	biological_process	0.00091026	0.712	7	783	53	26932	4	Zm00001d028083,Zm00001d002358,Novel01160,Zm00001d008203	3	Zm00001d013013,Zm00001d044321,Zm00001d026277
GO:0006120	mitochondrial electron transport, NADH to ubiquinone	biological_process	0.000919	0.712	2	783	2	26932	0		2	Zm00001d014772,Novel00789
GO:0006457	protein folding	biological_process	0.0011816	0.80351	16	783	226	26932	9	Zm00001d029997,Zm00001d006126,Zm00001d008209,Zm00001d000399,Zm00001d045544,Zm00001d008440,Zm00001d035937,Zm00001d052809,Zm00001d017187	7	Zm00001d016159,Zm00001d029722,Zm00001d016660,Zm00001d050635,Zm00001d015221,Zm00001d030339,Zm00001d051252
GO:0016491	oxidoreductase activity	molecular_function	0.0013825	0.80351	80	783	1920	26932	46	Zm00001d018181,Zm00001d002937,Zm00001d001960,Zm00001d008203,Zm00001d008427,Zm00001d054044,Zm00001d044156,Zm00001d037005,Zm00001d029390,Zm00001d048819,Zm00001d013231,Zm00001d046342,Zm00001d032046,Zm00001d004978,Zm00001d014958,Zm00001d002358,Zm00001d017418,Zm00001d006069,Zm00001d024843,Zm00001d003524,Zm00001d025288,Zm00001d030685,Zm00001d014919,Zm00001d034095,Zm00001d016802,Zm00001d012304,Zm00001d0…	34	Zm00001d023873,Zm00001d025545,Zm00001d050775,Zm00001d043543,Zm00001d001820,Zm00001d044120,Zm00001d025170,Zm00001d019850,Zm00001d052034,Zm00001d025533,Zm00001d026277,Zm00001d023437,Zm00001d043619,Zm00001d017598,Zm00001d033623,Zm00001d026154,Zm00001d051055,Zm00001d020717,Zm00001d049059,Novel00848,Zm00001d003086,Zm00001d053839,Zm00001d009373,Zm00001d023869,Zm00001d032090,Zm00001d015404,Zm00001d02569…
GO:0033013	tetrapyrrole metabolic process	biological_process	0.0016699	0.80351	8	783	75	26932	4	Zm00001d008203,Zm00001d002358,Zm00001d028083,Novel01160	4	Zm00001d013013,Zm00001d044321,Zm00001d031934,Zm00001d026277
GO:0005747	mitochondrial respiratory chain complex I	cellular_component	0.0021017	0.80351	3	783	9	26932	1	Novel00087	2	Zm00001d016864,Zm00001d014772
GO:0030964	NADH dehydrogenase complex	cellular_component	0.0021017	0.80351	3	783	9	26932	1	Novel00087	2	Zm00001d014772,Zm00001d016864
GO:0045271	respiratory chain complex I	cellular_component	0.0021017	0.80351	3	783	9	26932	1	Novel00087	2	Zm00001d014772,Zm00001d016864
GO:0006777	Mo-molybdopterin cofactor biosynthetic process	biological_process	0.0022516	0.80351	3	783	10	26932	1	Zm00001d016866	2	Zm00001d016850,Zm00001d051608
GO:0019720	Mo-molybdopterin cofactor metabolic process	biological_process	0.0022516	0.80351	3	783	10	26932	1	Zm00001d016866	2	Zm00001d016850,Zm00001d051608
GO:0001071	nucleic acid binding transcription factor activity	molecular_function	0.0024483	0.80351	39	783	803	26932	23	Zm00001d039531,Zm00001d009619,Zm00001d043663,Zm00001d014628,Zm00001d022437,Zm00001d026447,Zm00001d019475,Zm00001d037607,Novel01047,Zm00001d029940,Zm00001d020711,Zm00001d026305,Zm00001d047523,Zm00001d017462,Zm00001d038023,Zm00001d009939,Zm00001d050247,Zm00001d034920,Zm00001d019734,Zm00001d024768,Zm00001d043025,Zm00001d016457,Zm00001d048991	16	Zm00001d021268,Zm00001d012413,Zm00001d008190,Novel01032,Zm00001d042463,Zm00001d012128,Zm00001d026182,Zm00001d032144,Zm00001d044857,Zm00001d046751,Zm00001d027925,Zm00001d039077,Novel01406,Zm00001d017477,Zm00001d006835,Zm00001d039032
GO:0003700	transcription factor activity, sequence-specific DNA binding	molecular_function	0.0024483	0.80351	39	783	803	26932	23	Zm00001d034920,Zm00001d050247,Zm00001d019734,Zm00001d024768,Zm00001d043025,Zm00001d016457,Zm00001d048991,Zm00001d039531,Zm00001d009619,Zm00001d043663,Zm00001d014628,Zm00001d026447,Zm00001d022437,Zm00001d019475,Zm00001d037607,Novel01047,Zm00001d029940,Zm00001d020711,Zm00001d047523,Zm00001d026305,Zm00001d009939,Zm00001d017462,Zm00001d038023	16	Zm00001d012128,Zm00001d032144,Zm00001d026182,Zm00001d027925,Zm00001d044857,Zm00001d046751,Zm00001d017477,Novel01406,Zm00001d039077,Zm00001d006835,Zm00001d039032,Zm00001d021268,Zm00001d008190,Zm00001d012413,Zm00001d042463,Novel01032
GO:0070469	respiratory chain	cellular_component	0.0025403	0.80351	6	783	46	26932	1	Novel00087	5	Zm00001d042600,Zm00001d016619,Zm00001d014772,Zm00001d016864,Zm00001d005695
GO:0004109	coproporphyrinogen oxidase activity	molecular_function	0.0027794	0.80351	2	783	3	26932	1	Zm00001d002358	1	Zm00001d026277
GO:0004373	glycogen (starch) synthase activity	molecular_function	0.0029103	0.80351	3	783	12	26932	0		3	Zm00001d045261,Zm00001d019479,Zm00001d002256
GO:0032324	molybdopterin cofactor biosynthetic process	biological_process	0.003113	0.80351	3	783	11	26932	1	Zm00001d016866	2	Zm00001d016850,Zm00001d051608
GO:0043545	molybdopterin cofactor metabolic process	biological_process	0.003113	0.80351	3	783	11	26932	1	Zm00001d016866	2	Zm00001d016850,Zm00001d051608
GO:0051189	prosthetic group metabolic process	biological_process	0.003113	0.80351	3	783	11	26932	1	Zm00001d016866	2	Zm00001d016850,Zm00001d051608
GO:0016634	oxidoreductase activity, acting on the CH-CH group of donors, oxygen as acceptor	molecular_function	0.0032904	0.80351	3	783	11	26932	2	Zm00001d008203,Zm00001d002358	1	Zm00001d026277
GO:0005746	mitochondrial respiratory chain	cellular_component	0.0033707	0.80351	4	783	21	26932	1	Novel00087	3	Zm00001d005695,Zm00001d016864,Zm00001d014772
GO:0098798	mitochondrial protein complex	cellular_component	0.0038308	0.86127	6	783	50	26932	1	Novel00087	5	Zm00001d005695,Novel00092,Zm00001d015431,Zm00001d014772,Zm00001d016864
GO:0008171	O-methyltransferase activity	molecular_function	0.0039202	0.86127	6	783	50	26932	3	Zm00001d048087,Zm00001d047192,Zm00001d029359	3	Zm00001d049966,Zm00001d049179,Zm00001d049541
GO:0098803	respiratory chain complex	cellular_component	0.0040298	0.86127	4	783	22	26932	1	Novel00087	3	Zm00001d005695,Zm00001d014772,Zm00001d016864
GO:0051188	cofactor biosynthetic process	biological_process	0.0050452	1	12	783	174	26932	7	Novel01160,Zm00001d002358,Novel00672,Zm00001d028083,Zm00001d008203,Zm00001d026531,Zm00001d016866	5	Zm00001d016850,Zm00001d051608,Zm00001d026277,Zm00001d013013,Zm00001d044321
GO:0019008	molybdopterin synthase complex	cellular_component	0.005394	1	2	783	4	26932	1	Zm00001d016866	1	Zm00001d016850
GO:0016830	carbon-carbon lyase activity	molecular_function	0.0061598	1	9	783	115	26932	2	Zm00001d016963,Zm00001d028083	7	Zm00001d044321,Zm00001d000279,Zm00001d051194,Zm00001d047981,Zm00001d040084,Zm00001d003522,GRMZM5G815453
GO:0016757	transferase activity, transferring glycosyl groups	molecular_function	0.0064639	1	38	783	855	26932	24	Zm00001d024476,Zm00001d042740,Zm00001d053514,Zm00001d032866,Zm00001d016417,Zm00001d007869,Zm00001d015256,Zm00001d002753,Zm00001d035494,Zm00001d016896,Zm00001d016103,Zm00001d042514,Zm00001d033320,Zm00001d012335,Zm00001d016806,Zm00001d032222,Zm00001d007486,Zm00001d015623,Zm00001d016429,Zm00001d052813,Zm00001d004366,Zm00001d045972,Zm00001d016435,Zm00001d047801	14	Zm00001d024071,Zm00001d045261,Zm00001d034074,Zm00001d014965,Zm00001d003817,Zm00001d019479,Zm00001d002970,Zm00001d016424,Zm00001d013672,Zm00001d051681,Zm00001d002256,Zm00001d044566,Zm00001d046127,Zm00001d013052
GO:1901362	organic cyclic compound biosynthetic process	biological_process	0.0072433	1	100	783	2682	26932	49	Zm00001d022437,Zm00001d052564,Zm00001d019475,Zm00001d017130,Novel01202,Zm00001d043663,Zm00001d014628,Zm00001d049743,Novel01160,Zm00001d048561,Zm00001d009939,Zm00001d017462,Zm00001d016963,Zm00001d002358,Zm00001d047523,Zm00001d029940,Novel01047,Zm00001d008203,Zm00001d050247,Zm00001d015226,Zm00001d034920,Zm00001d028083,Zm00001d036364,Zm00001d024768,Zm00001d043025,Zm00001d026447,Zm00001d051166,Zm0000…	51	Zm00001d013013,Zm00001d039506,Zm00001d013655,Zm00001d012707,Zm00001d021268,Zm00001d049541,Novel01032,Zm00001d008817,Zm00001d051608,Zm00001d034461,Zm00001d022526,Zm00001d026421,Zm00001d026096,Zm00001d026182,Zm00001d032144,Zm00001d034160,Zm00001d012128,Zm00001d013035,Zm00001d016298,Zm00001d044321,Zm00001d022557,Zm00001d006835,Zm00001d028984,Zm00001d026277,Zm00001d027925,Zm00001d017477,Novel01406,Zm…
GO:0030604	1-deoxy-D-xylulose-5-phosphate reductoisomerase activity	molecular_function	0.0074482	1	2	783	5	26932	2	Zm00001d008427,Zm00001d027271	0
GO:0098800	inner mitochondrial membrane protein complex	cellular_component	0.0076198	1	5	783	41	26932	1	Novel00087	4	Zm00001d014772,Zm00001d016864,Zm00001d015431,Zm00001d005695
GO:0015238	drug transmembrane transporter activity	molecular_function	0.0079025	1	6	783	60	26932	2	Zm00001d000196,Zm00001d042692	4	Zm00001d021629,Zm00001d000195,Zm00001d008974,Zm00001d028311
GO:0090484	drug transporter activity	molecular_function	0.0085863	1	6	783	61	26932	2	Zm00001d042692,Zm00001d000196	4	Zm00001d028311,Zm00001d008974,Zm00001d021629,Zm00001d000195
GO:0004351	glutamate decarboxylase activity	molecular_function	0.0086255	1	2	783	5	26932	0		2	Zm00001d003522,Zm00001d047981
GO:0044455	mitochondrial membrane part	cellular_component	0.010318	1	6	783	62	26932	1	Novel00087	5	Zm00001d014772,Zm00001d016864,Zm00001d015431,Novel00092,Zm00001d005695
GO:0016831	carboxy-lyase activity	molecular_function	0.010325	1	7	783	83	26932	1	Zm00001d028083	6	Zm00001d003522,GRMZM5G815453,Zm00001d047981,Zm00001d044321,Zm00001d000279,Zm00001d051194
GO:0072330	monocarboxylic acid biosynthetic process	biological_process	0.010438	1	10	783	144	26932	6	Zm00001d031449,Zm00001d008623,Zm00001d051166,Zm00001d016438,Zm00001d005430,Zm00001d016006	4	Zm00001d013655,Zm00001d025545,Zm00001d025170,Zm00001d022557
GO:0018130	heterocycle biosynthetic process	biological_process	0.013508	1	95	783	2592	26932	45	Zm00001d008203,Zm00001d015226,Zm00001d034920,Zm00001d050247,Zm00001d028083,Zm00001d043025,Zm00001d024768,Zm00001d036364,Zm00001d014628,Zm00001d043663,Zm00001d017130,Novel01202,Zm00001d052564,Zm00001d019475,Zm00001d022437,Novel01160,Zm00001d049743,Zm00001d016963,Zm00001d009939,Zm00001d017462,Zm00001d029940,Novel01047,Zm00001d047523,Zm00001d002358,Zm00001d019734,Zm00001d027530,Novel00672,Zm00001d03…	50	Zm00001d026096,Zm00001d026421,Zm00001d022526,Zm00001d012128,Zm00001d016298,Zm00001d034160,Zm00001d026182,Zm00001d032144,Zm00001d026277,Zm00001d006835,Zm00001d028984,Zm00001d022557,Zm00001d044321,Zm00001d001838,Zm00001d017477,Novel01406,Zm00001d039077,Zm00001d027925,Zm00001d039506,Zm00001d013013,Zm00001d021268,Zm00001d012707,Zm00001d013655,Zm00001d008817,Novel01032,Zm00001d049541,Zm00001d034461,Zm…
GO:0008150	biological_process	biological_process	0.013529	1	535	783	17472	26932	260	Zm00001d044686,Zm00001d004366,Zm00001d010373,Zm00001d046923,Zm00001d007340,Zm00001d048991,Zm00001d015037,Zm00001d029997,Zm00001d010375,Zm00001d024314,Zm00001d052809,Zm00001d053652,Zm00001d014842,Zm00001d008632,Zm00001d016896,Zm00001d052902,Zm00001d039531,Zm00001d032069,Novel01559,Zm00001d041308,Zm00001d023843,Zm00001d043512,Zm00001d011315,Zm00001d016714,Zm00001d000196,Zm00001d029359,Zm00001d00293…	275	Zm00001d051779,Zm00001d033493,Zm00001d016242,Zm00001d049059,Zm00001d016477,Zm00001d021684,Zm00001d015404,Zm00001d049109,Zm00001d053761,Zm00001d027233,Zm00001d010634,Zm00001d030551,Zm00001d041453,Zm00001d012953,Zm00001d045759,Novel00326,Zm00001d010440,Zm00001d016691,Zm00001d021981,Zm00001d002458,Zm00001d050775,Zm00001d052034,Zm00001d014292,GRMZM5G815453,Novel01406,Zm00001d021938,Zm00001d026669,Zm0…
GO:0030170	pyridoxal phosphate binding	molecular_function	0.013766	1	9	783	127	26932	2	Zm00001d028165,Zm00001d026060	7	Zm00001d003522,Zm00001d034074,Zm00001d037507,Zm00001d015444,Zm00001d047981,Zm00001d015445,Zm00001d039487
GO:0000413	protein peptidyl-prolyl isomerization	biological_process	0.014117	1	7	783	86	26932	4	Zm00001d008209,Zm00001d008440,Zm00001d053652,Zm00001d054015	3	Zm00001d016660,Zm00001d030339,Zm00001d050635
GO:0003755	peptidyl-prolyl cis-trans isomerase activity	molecular_function	0.014117	1	7	783	86	26932	4	Zm00001d054015,Zm00001d008440,Zm00001d053652,Zm00001d008209	3	Zm00001d050635,Zm00001d030339,Zm00001d016660
GO:0018208	peptidyl-proline modification	biological_process	0.014817	1	7	783	87	26932	4	Zm00001d008209,Zm00001d008440,Zm00001d053652,Zm00001d054015	3	Zm00001d030339,Zm00001d050635,Zm00001d016660
GO:0003933	GTP cyclohydrolase activity	molecular_function	0.015652	1	2	783	7	26932	2	Zm00001d026531,Zm00001d016963	0
GO:0006865	amino acid transport	biological_process	0.015848	1	4	783	34	26932	0		4	Zm00001d008974,Zm00001d013652,Zm00001d033493,Zm00001d019225
GO:0015171	amino acid transmembrane transporter activity	molecular_function	0.015848	1	4	783	34	26932	0		4	Zm00001d019225,Zm00001d033493,Zm00001d008974,Zm00001d013652
GO:0008061	chitin binding	molecular_function	0.016571	1	3	783	18	26932	3	Zm00001d014842,Zm00001d014840,Zm00001d009936	0
GO:0016859	cis-trans isomerase activity	molecular_function	0.016698	1	7	783	89	26932	4	Zm00001d008440,Zm00001d053652,Zm00001d054015,Zm00001d008209	3	Zm00001d030339,Zm00001d050635,Zm00001d016660
GO:0009607	response to biotic stimulus	biological_process	0.018396	1	9	783	142	26932	6	Zm00001d048949,Zm00001d028165,Zm00001d023811,Zm00001d048950,Zm00001d026200,Zm00001d011069	3	Zm00001d026139,Zm00001d046781,Zm00001d019225
GO:0042793	transcription from plastid promoter	biological_process	0.019235	1	2	783	8	26932	2	Zm00001d033181,Zm00001d043325	0
GO:0008299	isoprenoid biosynthetic process	biological_process	0.020381	1	6	783	73	26932	5	Zm00001d006678,Zm00001d016714,Zm00001d008427,Zm00001d008370,Zm00001d027271	1	Zm00001d025545
GO:0005342	organic acid transmembrane transporter activity	molecular_function	0.020932	1	4	783	37	26932	0		4	Zm00001d033493,Zm00001d019225,Zm00001d008974,Zm00001d013652
GO:0046943	carboxylic acid transmembrane transporter activity	molecular_function	0.020932	1	4	783	37	26932	0		4	Zm00001d019225,Zm00001d033493,Zm00001d013652,Zm00001d008974
GO:0004853	uroporphyrinogen decarboxylase activity	molecular_function	0.02174	1	2	783	8	26932	1	Zm00001d028083	1	Zm00001d044321
GO:0004375	glycine dehydrogenase (decarboxylating) activity	molecular_function	0.02181	1	1	783	1	26932	0		1	Zm00001d023437
GO:0016642	oxidoreductase activity, acting on the CH-NH2 group of donors, disulfide as acceptor	molecular_function	0.02181	1	1	783	1	26932	0		1	Zm00001d023437
GO:0016984	ribulose-bisphosphate carboxylase activity	molecular_function	0.021984	1	2	783	8	26932	0		2	Zm00001d000279,GRMZM5G815453
GO:0006301	postreplication repair	biological_process	0.022387	1	1	783	1	26932	0		1	Zm00001d014568
GO:0019985	translesion synthesis	biological_process	0.022387	1	1	783	1	26932	0		1	Zm00001d014568
GO:0042276	error-prone translesion synthesis	biological_process	0.022387	1	1	783	1	26932	0		1	Zm00001d014568
GO:0004568	chitinase activity	molecular_function	0.02248	1	3	783	20	26932	3	Zm00001d009936,Zm00001d014842,Zm00001d014840	0
GO:0016998	cell wall macromolecule catabolic process	biological_process	0.02248	1	3	783	20	26932	3	Zm00001d009936,Zm00001d014840,Zm00001d014842	0
GO:0009532	plastid stroma	cellular_component	0.022993	1	11	783	190	26932	10	Zm00001d011069,Zm00001d002490,Zm00001d043325,Zm00001d033181,Zm00001d028338,Zm00001d016006,Zm00001d020437,Zm00001d047581,Zm00001d025333,Zm00001d021962	1	Zm00001d045261
GO:0006558	L-phenylalanine metabolic process	biological_process	0.024039	1	3	783	22	26932	3	Zm00001d048561,Zm00001d051166,Zm00001d025333	0
GO:1902221	erythrose 4-phosphate/phosphoenolpyruvate family amino acid metabolic process	biological_process	0.024039	1	3	783	22	26932	3	Zm00001d048561,Zm00001d051166,Zm00001d025333	0
GO:0004664	prephenate dehydratase activity	molecular_function	0.026198	1	2	783	9	26932	2	Zm00001d048561,Zm00001d025333	0
GO:0090227	regulation of red or far-red light signaling pathway	biological_process	0.027188	1	1	783	1	26932	1	Zm00001d043325	0
GO:0090228	positive regulation of red or far-red light signaling pathway	biological_process	0.027188	1	1	783	1	26932	1	Zm00001d043325	0
GO:0016602	CCAAT-binding factor complex	cellular_component	0.027306	1	2	783	9	26932	1	Zm00001d026305	1	Zm00001d006835
GO:0009662	etioplast organization	biological_process	0.02824	1	1	783	1	26932	1	Zm00001d033181	0
GO:0006855	drug transmembrane transport	biological_process	0.028385	1	5	783	59	26932	2	Zm00001d042692,Zm00001d000196	3	Zm00001d028311,Zm00001d021629,Zm00001d000195
GO:0015893	drug transport	biological_process	0.028385	1	5	783	59	26932	2	Zm00001d042692,Zm00001d000196	3	Zm00001d028311,Zm00001d021629,Zm00001d000195
GO:0009501	amyloplast	cellular_component	0.029229	1	2	783	10	26932	0		2	Zm00001d045261,Zm00001d019479
GO:0015175	neutral amino acid transmembrane transporter activity	molecular_function	0.030083	1	1	783	1	26932	0		1	Zm00001d019225
GO:0015804	neutral amino acid transport	biological_process	0.030083	1	1	783	1	26932	0		1	Zm00001d019225
GO:0003922	GMP synthase (glutamine-hydrolyzing) activity	molecular_function	0.030098	1	1	783	1	26932	1	Zm00001d026685	0
GO:0019808	polyamine binding	molecular_function	0.030127	1	1	783	1	26932	1	Zm00001d026244	0
GO:0004683	calmodulin-dependent protein kinase activity	molecular_function	0.030227	1	1	783	1	26932	0		1	Zm00001d012929
GO:0042493	response to drug	biological_process	0.030361	1	5	783	60	26932	2	Zm00001d042692,Zm00001d000196	3	Zm00001d028311,Zm00001d000195,Zm00001d021629
GO:0004077	biotin-[acetyl-CoA-carboxylase] ligase activity	molecular_function	0.030477	1	1	783	1	26932	1	Zm00001d015344	0
GO:0018271	biotin-protein ligase activity	molecular_function	0.030477	1	1	783	1	26932	1	Zm00001d015344	0
GO:0030479	actin cortical patch	cellular_component	0.030489	1	1	783	1	26932	0		1	Novel01812
GO:0030864	cortical actin cytoskeleton	cellular_component	0.030489	1	1	783	1	26932	0		1	Novel01812
GO:0061645	endocytic patch	cellular_component	0.030489	1	1	783	1	26932	0		1	Novel01812
GO:0020037	heme binding	molecular_function	0.030506	1	25	783	552	26932	20	Zm00001d012304,Zm00001d014958,Zm00001d032458,Zm00001d034095,Zm00001d002937,Zm00001d016802,Zm00001d033152,Zm00001d030685,Zm00001d048819,Zm00001d013231,Zm00001d012322,Zm00001d044157,Zm00001d024752,Zm00001d046342,Zm00001d029822,Zm00001d044156,Zm00001d029390,Zm00001d054044,Zm00001d014134,Zm00001d040705	5	Zm00001d020717,Zm00001d042600,Zm00001d044120,Zm00001d053839,Zm00001d009373
GO:0017096	acetylserotonin O-methyltransferase activity	molecular_function	0.030686	1	1	783	1	26932	0		1	Zm00001d049541
GO:0030744	luteolin O-methyltransferase activity	molecular_function	0.030686	1	1	783	1	26932	0		1	Zm00001d049541
GO:0051552	flavone metabolic process	biological_process	0.030686	1	1	783	1	26932	0		1	Zm00001d049541
GO:0051553	flavone biosynthetic process	biological_process	0.030686	1	1	783	1	26932	0		1	Zm00001d049541
GO:0051554	flavonol metabolic process	biological_process	0.030686	1	1	783	1	26932	0		1	Zm00001d049541
GO:0051555	flavonol biosynthetic process	biological_process	0.030686	1	1	783	1	26932	0		1	Zm00001d049541
GO:0008153	para-aminobenzoic acid biosynthetic process	biological_process	0.030752	1	1	783	1	26932	1	Zm00001d016006	0
GO:0046482	para-aminobenzoic acid metabolic process	biological_process	0.030752	1	1	783	1	26932	1	Zm00001d016006	0
GO:0008967	phosphoglycolate phosphatase activity	molecular_function	0.030773	1	1	783	1	26932	1	Zm00001d034887	0
GO:0048478	replication fork protection	biological_process	0.030794	1	1	783	1	26932	1	Zm00001d014885	0
GO:0000064	L-ornithine transmembrane transporter activity	molecular_function	0.030815	1	1	783	1	26932	0		1	Zm00001d008974
GO:0001533	cornified envelope	cellular_component	0.030815	1	1	783	1	26932	1	Novel01880	0
GO:0003012	muscle system process	biological_process	0.030815	1	1	783	1	26932	1	Novel01309	0
GO:0005290	L-histidine transmembrane transporter activity	molecular_function	0.030815	1	1	783	1	26932	0		1	Zm00001d008974
GO:0006936	muscle contraction	biological_process	0.030815	1	1	783	1	26932	1	Novel01309	0
GO:0006937	regulation of muscle contraction	biological_process	0.030815	1	1	783	1	26932	1	Novel01309	0
GO:0006939	smooth muscle contraction	biological_process	0.030815	1	1	783	1	26932	1	Novel01309	0
GO:0006940	regulation of smooth muscle contraction	biological_process	0.030815	1	1	783	1	26932	1	Novel01309	0
GO:0015174	basic amino acid transmembrane transporter activity	molecular_function	0.030815	1	1	783	1	26932	0		1	Zm00001d008974
GO:0015179	L-amino acid transmembrane transporter activity	molecular_function	0.030815	1	1	783	1	26932	0		1	Zm00001d008974
GO:0015181	arginine transmembrane transporter activity	molecular_function	0.030815	1	1	783	1	26932	0		1	Zm00001d008974
GO:0015189	L-lysine transmembrane transporter activity	molecular_function	0.030815	1	1	783	1	26932	0		1	Zm00001d008974
GO:0015802	basic amino acid transport	biological_process	0.030815	1	1	783	1	26932	0		1	Zm00001d008974
GO:0015807	L-amino acid transport	biological_process	0.030815	1	1	783	1	26932	0		1	Zm00001d008974
GO:0015809	arginine transport	biological_process	0.030815	1	1	783	1	26932	0		1	Zm00001d008974
GO:0015817	histidine transport	biological_process	0.030815	1	1	783	1	26932	0		1	Zm00001d008974
GO:0015819	lysine transport	biological_process	0.030815	1	1	783	1	26932	0		1	Zm00001d008974
GO:0015822	ornithine transport	biological_process	0.030815	1	1	783	1	26932	0		1	Zm00001d008974
GO:0019955	cytokine binding	molecular_function	0.030815	1	1	783	1	26932	1	Novel00377	0
GO:0019956	chemokine binding	molecular_function	0.030815	1	1	783	1	26932	1	Novel00377	0
GO:0030493	bacteriochlorophyll metabolic process	biological_process	0.030815	1	1	783	1	26932	1	Novel01160	0
GO:0030494	bacteriochlorophyll biosynthetic process	biological_process	0.030815	1	1	783	1	26932	1	Novel01160	0
GO:0043090	amino acid import	biological_process	0.030815	1	1	783	1	26932	0		1	Zm00001d008974
GO:0043091	L-arginine import	biological_process	0.030815	1	1	783	1	26932	0		1	Zm00001d008974
GO:0043092	L-amino acid import	biological_process	0.030815	1	1	783	1	26932	0		1	Zm00001d008974
GO:0089709	L-histidine transmembrane transport	biological_process	0.030815	1	1	783	1	26932	0		1	Zm00001d008974
GO:0090257	regulation of muscle system process	biological_process	0.030815	1	1	783	1	26932	1	Novel01309	0
GO:0090467	arginine import	biological_process	0.030815	1	1	783	1	26932	0		1	Zm00001d008974
GO:1901474	azole transmembrane transporter activity	molecular_function	0.030815	1	1	783	1	26932	0		1	Zm00001d008974
GO:1902022	L-lysine transport	biological_process	0.030815	1	1	783	1	26932	0		1	Zm00001d008974
GO:1902023	L-arginine transport	biological_process	0.030815	1	1	783	1	26932	0		1	Zm00001d008974
GO:1902024	L-histidine transport	biological_process	0.030815	1	1	783	1	26932	0		1	Zm00001d008974
GO:1902475	L-alpha-amino acid transmembrane transport	biological_process	0.030815	1	1	783	1	26932	0		1	Zm00001d008974
GO:1903352	L-ornithine transmembrane transport	biological_process	0.030815	1	1	783	1	26932	0		1	Zm00001d008974
GO:1903401	L-lysine transmembrane transport	biological_process	0.030815	1	1	783	1	26932	0		1	Zm00001d008974
GO:1903826	arginine transmembrane transport	biological_process	0.030815	1	1	783	1	26932	0		1	Zm00001d008974
GO:0016053	organic acid biosynthetic process	biological_process	0.030857	1	18	783	379	26932	12	Zm00001d051166,Zm00001d005430,Zm00001d013644,Zm00001d048561,Zm00001d025333,Zm00001d016438,Zm00001d046923,Zm00001d016006,Zm00001d028165,Zm00001d026531,Zm00001d031449,Zm00001d008623	6	Zm00001d008974,Zm00001d013655,Zm00001d025545,Zm00001d022557,Zm00001d025170,Zm00001d034461
GO:0046394	carboxylic acid biosynthetic process	biological_process	0.030857	1	18	783	379	26932	12	Zm00001d026531,Zm00001d046923,Zm00001d028165,Zm00001d016006,Zm00001d025333,Zm00001d016438,Zm00001d008623,Zm00001d031449,Zm00001d013644,Zm00001d051166,Zm00001d005430,Zm00001d048561	6	Zm00001d022557,Zm00001d034461,Zm00001d025170,Zm00001d008974,Zm00001d013655,Zm00001d025545
GO:0009536	plastid	cellular_component	0.030877	1	30	783	715	26932	20	Zm00001d043325,Zm00001d034887,Zm00001d037860,Zm00001d002490,Zm00001d045144,Zm00001d020437,Zm00001d004978,Zm00001d016714,Zm00001d028338,Zm00001d011069,Zm00001d038606,Zm00001d047581,Zm00001d021962,Zm00001d021245,Zm00001d052410,Zm00001d025333,Zm00001d054015,Zm00001d026016,Zm00001d033181,Zm00001d016006	10	Zm00001d025545,Zm00001d038291,Zm00001d015431,Zm00001d013013,Zm00001d014744,Zm00001d019479,Zm00001d045261,GRMZM5G815453,Zm00001d025170,Zm00001d000279
GO:0006720	isoprenoid metabolic process	biological_process	0.031843	1	6	783	81	26932	5	Zm00001d008427,Zm00001d027271,Zm00001d008370,Zm00001d016714,Zm00001d006678	1	Zm00001d025545
GO:0019238	cyclohydrolase activity	molecular_function	0.031875	1	2	783	10	26932	2	Zm00001d016963,Zm00001d026531	0
GO:0006026	aminoglycan catabolic process	biological_process	0.032633	1	3	783	23	26932	3	Zm00001d014842,Zm00001d014840,Zm00001d009936	0
GO:0006030	chitin metabolic process	biological_process	0.032633	1	3	783	23	26932	3	Zm00001d009936,Zm00001d014840,Zm00001d014842	0
GO:0006032	chitin catabolic process	biological_process	0.032633	1	3	783	23	26932	3	Zm00001d014842,Zm00001d014840,Zm00001d009936	0
GO:0046348	amino sugar catabolic process	biological_process	0.032633	1	3	783	23	26932	3	Zm00001d014842,Zm00001d014840,Zm00001d009936	0
GO:1901071	glucosamine-containing compound metabolic process	biological_process	0.032633	1	3	783	23	26932	3	Zm00001d014842,Zm00001d014840,Zm00001d009936	0
GO:1901072	glucosamine-containing compound catabolic process	biological_process	0.032633	1	3	783	23	26932	3	Zm00001d014840,Zm00001d014842,Zm00001d009936	0
GO:0044283	small molecule biosynthetic process	biological_process	0.033399	1	21	783	465	26932	13	Zm00001d025333,Zm00001d016438,Zm00001d016006,Zm00001d046923,Zm00001d028165,Zm00001d026531,Zm00001d016963,Zm00001d031449,Zm00001d008623,Zm00001d051166,Zm00001d005430,Zm00001d013644,Zm00001d048561	8	Zm00001d022557,Zm00001d025170,Zm00001d034461,Zm00001d014292,Zm00001d008974,Zm00001d013655,Zm00001d012707,Zm00001d025545
GO:0016835	carbon-oxygen lyase activity	molecular_function	0.033406	1	9	783	150	26932	6	Zm00001d048561,Zm00001d024211,Zm00001d024208,Zm00001d029648,Zm00001d041082,Zm00001d025333	3	Zm00001d017416,Zm00001d034461,Zm00001d016801
GO:0051186	cofactor metabolic process	biological_process	0.034762	1	17	783	357	26932	9	Zm00001d010375,Zm00001d002358,Zm00001d016866,Zm00001d026531,Zm00001d028083,Novel00672,Novel01160,Zm00001d024138,Zm00001d008203	8	Zm00001d040084,Zm00001d051608,Zm00001d036206,Zm00001d044321,Zm00001d026277,Zm00001d016850,Zm00001d013013,Zm00001d031934
GO:0010333	terpene synthase activity	molecular_function	0.035206	1	4	783	43	26932	4	Zm00001d024211,Zm00001d041082,Zm00001d029648,Zm00001d024208	0
GO:0030410	nicotianamine synthase activity	molecular_function	0.03589	1	2	783	10	26932	0		2	Zm00001d013655,Zm00001d022557
GO:0030417	nicotianamine metabolic process	biological_process	0.03589	1	2	783	10	26932	0		2	Zm00001d022557,Zm00001d013655
GO:0030418	nicotianamine biosynthetic process	biological_process	0.03589	1	2	783	10	26932	0		2	Zm00001d013655,Zm00001d022557
GO:0006536	glutamate metabolic process	biological_process	0.035941	1	2	783	12	26932	0		2	Zm00001d003522,Zm00001d047981
GO:0019438	aromatic compound biosynthetic process	biological_process	0.036215	1	91	783	2578	26932	47	Zm00001d037607,Zm00001d026305,Zm00001d020711,Zm00001d016006,Zm00001d038023,Novel01559,Zm00001d013151,Zm00001d026685,Zm00001d009619,Zm00001d043325,Zm00001d039531,Zm00001d043094,Zm00001d026447,Zm00001d051166,Zm00001d041886,Zm00001d033181,Zm00001d026531,Zm00001d048991,Zm00001d025333,Zm00001d016457,Zm00001d027530,Novel00672,Zm00001d019734,Novel01047,Zm00001d029940,Zm00001d047523,Zm00001d002358,Zm0000…	44	Zm00001d013126,Zm00001d008190,Zm00001d027431,Zm00001d012413,Zm00001d045320,Zm00001d016277,Novel01548,Novel00326,Zm00001d051480,Zm00001d042463,Zm00001d010634,Novel01082,Zm00001d028603,Zm00001d041453,Zm00001d046947,Zm00001d014568,Zm00001d046751,Zm00001d044857,Zm00001d039032,Zm00001d035916,Zm00001d034461,Zm00001d008817,Novel01032,Zm00001d049541,Zm00001d021268,Zm00001d039506,Zm00001d013013,Zm00001d00…
GO:0006119	oxidative phosphorylation	biological_process	0.036364	1	3	783	25	26932	0		3	Zm00001d014772,Novel00789,Novel00848
GO:0042773	ATP synthesis coupled electron transport	biological_process	0.036364	1	3	783	25	26932	0		3	Novel00789,Zm00001d014772,Novel00848
GO:0008271	secondary active sulfate transmembrane transporter activity	molecular_function	0.036747	1	2	783	11	26932	0		2	Zm00001d000204,Zm00001d028164
GO:0008272	sulfate transport	biological_process	0.036747	1	2	783	11	26932	0		2	Zm00001d028164,Zm00001d000204
GO:0015116	sulfate transmembrane transporter activity	molecular_function	0.036747	1	2	783	11	26932	0		2	Zm00001d000204,Zm00001d028164
GO:1901682	sulfur compound transmembrane transporter activity	molecular_function	0.036747	1	2	783	11	26932	0		2	Zm00001d000204,Zm00001d028164
GO:1902358	sulfate transmembrane transport	biological_process	0.036747	1	2	783	11	26932	0		2	Zm00001d028164,Zm00001d000204
GO:0009094	L-phenylalanine biosynthetic process	biological_process	0.037546	1	2	783	11	26932	2	Zm00001d048561,Zm00001d025333	0
GO:1902223	erythrose 4-phosphate/phosphoenolpyruvate family amino acid biosynthetic process	biological_process	0.037546	1	2	783	11	26932	2	Zm00001d025333,Zm00001d048561	0
GO:0006355	regulation of transcription, DNA-templated	biological_process	0.038028	1	70	783	1917	26932	35	Zm00001d048991,Zm00001d016457,Zm00001d041886,Zm00001d019734,Zm00001d027530,Zm00001d038023,Novel01559,Zm00001d013151,Zm00001d037607,Zm00001d026305,Zm00001d020711,Zm00001d043094,Zm00001d026447,Zm00001d009619,Zm00001d043325,Zm00001d039531,Zm00001d043025,Zm00001d024768,Zm00001d036364,Zm00001d015226,Zm00001d034920,Zm00001d050247,Zm00001d009939,Zm00001d017462,Novel01047,Zm00001d029940,Zm00001d047523,Zm…	35	Zm00001d039032,Zm00001d046947,Zm00001d046751,Zm00001d044857,Zm00001d051480,Zm00001d042463,Zm00001d013126,Zm00001d008190,Zm00001d027431,Zm00001d012413,Zm00001d045320,Zm00001d016277,Novel00326,Novel01082,Zm00001d010634,Zm00001d028603,Zm00001d041453,Zm00001d006835,Zm00001d028984,Zm00001d001838,Zm00001d017477,Novel01406,Zm00001d039077,Zm00001d027925,Zm00001d026096,Zm00001d022526,Zm00001d012128,Zm0000…
GO:0016705	oxidoreductase activity, acting on paired donors, with incorporation or reduction of molecular oxygen	molecular_function	0.038474	1	20	783	432	26932	15	Zm00001d046342,Zm00001d044157,Zm00001d012322,Zm00001d013231,Zm00001d048819,Zm00001d033152,Zm00001d034095,Zm00001d002937,Zm00001d032458,Zm00001d014958,Zm00001d012304,Zm00001d014134,Zm00001d029390,Zm00001d044156,Zm00001d029822	5	Zm00001d020717,Zm00001d025545,Zm00001d025170,Novel00326,Zm00001d044120
GO:0008514	organic anion transmembrane transporter activity	molecular_function	0.039135	1	4	783	45	26932	0		4	Zm00001d013652,Zm00001d008974,Zm00001d033493,Zm00001d019225
GO:0042274	ribosomal small subunit biogenesis	biological_process	0.03964	1	2	783	11	26932	2	Zm00001d027919,Zm00001d003618	0
GO:0005215	transporter activity	molecular_function	0.040152	1	45	783	1210	26932	11	Zm00001d013529,Zm00001d026156,Zm00001d051174,Zm00001d003913,Zm00001d008345,Zm00001d017713,Zm00001d000196,Zm00001d041308,Zm00001d021461,Zm00001d018332,Zm00001d042692	34	Zm00001d028164,Zm00001d043374,Zm00001d006697,Zm00001d040627,Zm00001d021938,Zm00001d039713,Zm00001d021629,Zm00001d049441,Zm00001d053446,Zm00001d025894,Zm00001d033493,Zm00001d008974,Zm00001d016794,Zm00001d052261,Zm00001d033067,Zm00001d051362,Zm00001d012953,Zm00001d016619,Zm00001d051055,Zm00001d016396,Zm00001d017249,Zm00001d019225,Zm00001d042684,Zm00001d033446,Zm00001d037492,Zm00001d013652,Zm00001d0…
GO:0009570	chloroplast stroma	cellular_component	0.040974	1	10	783	183	26932	9	Zm00001d002490,Zm00001d011069,Zm00001d028338,Zm00001d016006,Zm00001d033181,Zm00001d025333,Zm00001d021962,Zm00001d020437,Zm00001d047581	1	Zm00001d045261
GO:0004497	monooxygenase activity	molecular_function	0.041214	1	16	783	329	26932	13	Zm00001d016841,Zm00001d014958,Zm00001d032458,Zm00001d044157,Zm00001d012322,Zm00001d046342,Zm00001d033152,Zm00001d002937,Zm00001d048819,Zm00001d029390,Zm00001d029822,Zm00001d044156,Zm00001d014134	3	Zm00001d020717,Zm00001d025545,Zm00001d044120
GO:0072351	tricarboxylic acid biosynthetic process	biological_process	0.041667	1	2	783	11	26932	0		2	Zm00001d013655,Zm00001d022557
GO:0032787	monocarboxylic acid metabolic process	biological_process	0.041786	1	15	783	310	26932	8	Zm00001d008623,Zm00001d010375,Zm00001d031449,Zm00001d016006,Zm00001d024138,Zm00001d051166,Zm00001d016438,Zm00001d005430	7	Zm00001d025170,Zm00001d013655,Zm00001d036206,Zm00001d025545,Zm00001d040084,Zm00001d010321,Zm00001d022557
GO:0043140	ATP-dependent 3'-5' DNA helicase activity	molecular_function	0.041917	1	1	783	2	26932	0		1	Zm00001d015212
GO:0044710	single-organism metabolic process	biological_process	0.042481	1	152	783	4668	26932	71	Zm00001d048819,Zm00001d046342,Zm00001d048561,Zm00001d004978,Zm00001d032046,Zm00001d014958,Zm00001d024843,Zm00001d006069,Zm00001d003524,Zm00001d025288,Zm00001d016963,Zm00001d002937,Zm00001d001960,Zm00001d016714,Zm00001d008427,Zm00001d054044,Zm00001d008370,Zm00001d012335,Zm00001d044156,Zm00001d037005,Zm00001d052902,Zm00001d043325,Zm00001d024752,Zm00001d027271,Zm00001d007687,Zm00001d044157,Zm00001d0…	81	Zm00001d043619,Novel01087,Zm00001d050944,Zm00001d031685,Zm00001d033623,Zm00001d034461,Zm00001d051634,Zm00001d045261,Zm00001d042600,Zm00001d023873,Zm00001d003522,Zm00001d050775,Zm00001d013035,Zm00001d046127,Zm00001d044566,Zm00001d011477,Zm00001d040084,Zm00001d044120,Zm00001d001820,GRMZM5G815453,Zm00001d014292,Zm00001d015008,Zm00001d022557,Zm00001d025533,Zm00001d052034,Zm00001d050917,Zm00001d038291…
GO:1903506	regulation of nucleic acid-templated transcription	biological_process	0.042869	1	70	783	1930	26932	35	Zm00001d019734,Zm00001d027530,Zm00001d048991,Zm00001d016457,Zm00001d041886,Zm00001d043094,Zm00001d026447,Zm00001d043325,Zm00001d009619,Zm00001d039531,Zm00001d013151,Novel01559,Zm00001d038023,Zm00001d026305,Zm00001d020711,Zm00001d037607,Zm00001d015226,Zm00001d034920,Zm00001d050247,Zm00001d036364,Zm00001d043025,Zm00001d024768,Zm00001d019475,Zm00001d052564,Zm00001d022437,Zm00001d014628,Zm00001d04366…	35	Zm00001d039032,Zm00001d044857,Zm00001d046751,Zm00001d046947,Zm00001d028603,Zm00001d041453,Novel01082,Zm00001d010634,Zm00001d042463,Zm00001d051480,Zm00001d016277,Zm00001d045320,Novel00326,Zm00001d013126,Zm00001d012413,Zm00001d027431,Zm00001d008190,Zm00001d022526,Zm00001d026096,Zm00001d032144,Zm00001d026182,Zm00001d012128,Zm00001d016298,Zm00001d034160,Zm00001d028984,Zm00001d006835,Zm00001d039077,No…
GO:2001141	regulation of RNA biosynthetic process	biological_process	0.042869	1	70	783	1930	26932	35	Zm00001d037607,Zm00001d026305,Zm00001d020711,Zm00001d038023,Novel01559,Zm00001d013151,Zm00001d009619,Zm00001d043325,Zm00001d039531,Zm00001d043094,Zm00001d026447,Zm00001d041886,Zm00001d048991,Zm00001d016457,Zm00001d027530,Zm00001d019734,Novel01047,Zm00001d029940,Zm00001d047523,Zm00001d009939,Zm00001d017462,Zm00001d049743,Zm00001d014628,Zm00001d017130,Novel01202,Zm00001d043663,Zm00001d052564,Zm0000…	35	Zm00001d013126,Zm00001d008190,Zm00001d027431,Zm00001d012413,Zm00001d045320,Zm00001d016277,Novel00326,Zm00001d051480,Zm00001d042463,Novel01082,Zm00001d010634,Zm00001d028603,Zm00001d041453,Zm00001d046947,Zm00001d046751,Zm00001d044857,Zm00001d039032,Zm00001d008817,Novel01032,Zm00001d021268,Zm00001d039506,Zm00001d001838,Zm00001d017477,Novel01406,Zm00001d039077,Zm00001d027925,Zm00001d006835,Zm00001d02…
GO:0015291	secondary active transmembrane transporter activity	molecular_function	0.042896	1	9	783	164	26932	4	Zm00001d021461,Zm00001d042692,Zm00001d041308,Zm00001d000196	5	Zm00001d028164,Zm00001d000204,Zm00001d000195,Zm00001d028311,Zm00001d021629
GO:0006771	riboflavin metabolic process	biological_process	0.042916	1	2	783	12	26932	1	Zm00001d016963	1	Zm00001d012707
GO:0009231	riboflavin biosynthetic process	biological_process	0.042916	1	2	783	12	26932	1	Zm00001d016963	1	Zm00001d012707
GO:0042727	flavin-containing compound biosynthetic process	biological_process	0.042916	1	2	783	12	26932	1	Zm00001d016963	1	Zm00001d012707
GO:0008194	UDP-glycosyltransferase activity	molecular_function	0.043093	1	12	783	248	26932	6	Zm00001d035494,Zm00001d016103,Zm00001d047801,Zm00001d042514,Zm00001d015256,Zm00001d012335	6	Zm00001d019479,Zm00001d002256,Zm00001d044566,Zm00001d046127,Zm00001d045261,Zm00001d013672
GO:0015926	glucosidase activity	molecular_function	0.043512	1	2	783	12	26932	1	Zm00001d025943	1	Zm00001d012159
GO:0072348	sulfur compound transport	biological_process	0.043857	1	2	783	12	26932	0		2	Zm00001d000204,Zm00001d028164
GO:0031966	mitochondrial membrane	cellular_component	0.044336	1	8	783	132	26932	1	Novel00087	7	Novel00092,Zm00001d016864,Zm00001d015431,Zm00001d005695,Zm00001d048583,Zm00001d014772,Zm00001d016619
GO:0009011	starch synthase activity	molecular_function	0.044855	1	1	783	2	26932	0		1	Zm00001d045261
GO:0019219	regulation of nucleobase-containing compound metabolic process	biological_process	0.044876	1	71	783	1968	26932	36	Zm00001d009939,Zm00001d017462,Zm00001d047523,Zm00001d029940,Novel01047,Zm00001d052564,Zm00001d019475,Zm00001d022437,Zm00001d014628,Zm00001d043663,Novel01202,Zm00001d017130,Zm00001d049743,Zm00001d036364,Zm00001d043025,Zm00001d024768,Zm00001d015226,Zm00001d034920,Zm00001d050247,Novel01559,Zm00001d013151,Zm00001d038023,Zm00001d026305,Zm00001d020711,Zm00001d037607,Zm00001d043094,Zm00001d026447,Zm0000…	35	Novel01032,Zm00001d008817,Zm00001d039506,Zm00001d021268,Zm00001d006835,Zm00001d028984,Novel01406,Zm00001d017477,Zm00001d039077,Zm00001d027925,Zm00001d001838,Zm00001d022526,Zm00001d026096,Zm00001d026182,Zm00001d032144,Zm00001d016298,Zm00001d012128,Zm00001d034160,Zm00001d042463,Zm00001d051480,Zm00001d045320,Zm00001d016277,Novel00326,Zm00001d013126,Zm00001d008190,Zm00001d027431,Zm00001d012413,Zm0000…
GO:0003674	molecular_function	molecular_function	0.045081	1	626	783	20936	26932	316	Zm00001d045972,Zm00001d019734,Zm00001d024763,Zm00001d015519,Zm00001d029822,Zm00001d033181,Novel00020,Zm00001d029325,Zm00001d033152,Zm00001d042098,Zm00001d012322,Zm00001d008853,Zm00001d013151,Zm00001d016697,Zm00001d016006,Zm00001d024476,Zm00001d011069,Zm00001d008700,Zm00001d024138,Zm00001d037969,Zm00001d008203,Zm00001d026300,Zm00001d028083,Zm00001d018181,Zm00001d007486,Zm00001d044765,Zm00001d02070…	310	Zm00001d051194,Zm00001d046781,Zm00001d012972,Zm00001d002256,Zm00001d043652,Zm00001d051681,Zm00001d014568,Zm00001d046947,Zm00001d041389,Zm00001d021038,Zm00001d028140,Zm00001d038651,Zm00001d003817,Zm00001d051800,Zm00001d025734,Zm00001d016619,Zm00001d052769,Zm00001d026677,Zm00001d053895,Zm00001d034555,Zm00001d031212,Zm00001d028311,Zm00001d026521,Zm00001d051252,Zm00001d032703,Zm00001d050712,Zm00001d0…
GO:0008531	riboflavin kinase activity	molecular_function	0.045507	1	1	783	2	26932	0		1	Zm00001d012707
GO:1901565	organonitrogen compound catabolic process	biological_process	0.046032	1	7	783	112	26932	4	Zm00001d014840,Zm00001d014842,Zm00001d051166,Zm00001d009936	3	Zm00001d031934,Zm00001d051194,Zm00001d023437
GO:0051252	regulation of RNA metabolic process	biological_process	0.046725	1	70	783	1940	26932	35	Zm00001d027530,Zm00001d019734,Zm00001d041886,Zm00001d016457,Zm00001d048991,Zm00001d039531,Zm00001d043325,Zm00001d009619,Zm00001d026447,Zm00001d043094,Zm00001d020711,Zm00001d026305,Zm00001d037607,Zm00001d013151,Novel01559,Zm00001d038023,Zm00001d050247,Zm00001d034920,Zm00001d015226,Zm00001d036364,Zm00001d024768,Zm00001d043025,Zm00001d049743,Zm00001d022437,Zm00001d019475,Zm00001d052564,Zm00001d04366…	35	Zm00001d046751,Zm00001d044857,Zm00001d046947,Zm00001d039032,Zm00001d041453,Zm00001d028603,Zm00001d010634,Novel01082,Novel00326,Zm00001d016277,Zm00001d045320,Zm00001d012413,Zm00001d027431,Zm00001d008190,Zm00001d013126,Zm00001d042463,Zm00001d051480,Zm00001d032144,Zm00001d026182,Zm00001d034160,Zm00001d016298,Zm00001d012128,Zm00001d022526,Zm00001d026096,Zm00001d027925,Zm00001d039077,Zm00001d017477,No…
GO:0006040	amino sugar metabolic process	biological_process	0.047038	1	3	783	27	26932	3	Zm00001d009936,Zm00001d014842,Zm00001d014840	0
GO:0015994	chlorophyll metabolic process	biological_process	0.047213	1	3	783	28	26932	1	Novel01160	2	Zm00001d013013,Zm00001d031934
GO:0031326	regulation of cellular biosynthetic process	biological_process	0.048037	1	72	783	2008	26932	37	Zm00001d038023,Zm00001d013151,Novel01559,Zm00001d037607,Zm00001d020711,Zm00001d026305,Zm00001d026447,Zm00001d043094,Zm00001d039531,Zm00001d043325,Zm00001d009619,Zm00001d016457,Zm00001d048991,Zm00001d041886,Zm00001d014885,Zm00001d019734,Zm00001d027530,Zm00001d017462,Zm00001d009939,Novel01047,Zm00001d029940,Zm00001d047523,Novel01202,Zm00001d017130,Zm00001d043663,Zm00001d014628,Zm00001d022437,Zm0000…	35	Zm00001d051480,Zm00001d042463,Zm00001d027431,Zm00001d012413,Zm00001d008190,Zm00001d013126,Novel00326,Zm00001d016277,Zm00001d045320,Novel01082,Zm00001d010634,Zm00001d041453,Zm00001d028603,Zm00001d039032,Zm00001d046947,Zm00001d044857,Zm00001d046751,Zm00001d008817,Novel01032,Zm00001d039506,Zm00001d021268,Zm00001d028984,Zm00001d006835,Zm00001d001838,Zm00001d027925,Zm00001d039077,Zm00001d017477,Novel0…
GO:0009889	regulation of biosynthetic process	biological_process	0.048398	1	72	783	2009	26932	37	Zm00001d013151,Novel01559,Zm00001d038023,Zm00001d026305,Zm00001d020711,Zm00001d037607,Zm00001d043094,Zm00001d026447,Zm00001d043325,Zm00001d009619,Zm00001d039531,Zm00001d048991,Zm00001d016457,Zm00001d014885,Zm00001d041886,Zm00001d019734,Zm00001d027530,Zm00001d017462,Zm00001d009939,Zm00001d047523,Novel01047,Zm00001d029940,Zm00001d019475,Zm00001d052564,Zm00001d022437,Zm00001d014628,Novel01202,Zm0000…	35	Zm00001d042463,Zm00001d051480,Zm00001d016277,Zm00001d045320,Novel00326,Zm00001d013126,Zm00001d027431,Zm00001d012413,Zm00001d008190,Zm00001d028603,Zm00001d041453,Zm00001d010634,Novel01082,Zm00001d039032,Zm00001d044857,Zm00001d046751,Zm00001d046947,Novel01032,Zm00001d008817,Zm00001d039506,Zm00001d021268,Zm00001d028984,Zm00001d006835,Zm00001d039077,Novel01406,Zm00001d017477,Zm00001d027925,Zm00001d00…
GO:0042726	flavin-containing compound metabolic process	biological_process	0.048505	1	2	783	13	26932	1	Zm00001d016963	1	Zm00001d012707
GO:0009309	amine biosynthetic process	biological_process	0.048576	1	4	783	46	26932	0		4	Zm00001d022557,Zm00001d051194,Zm00001d013655,Zm00001d034461
GO:0042401	cellular biogenic amine biosynthetic process	biological_process	0.048576	1	4	783	46	26932	0		4	Zm00001d034461,Zm00001d013655,Zm00001d051194,Zm00001d022557
GO:0042597	periplasmic space	cellular_component	0.049057	1	1	783	2	26932	1	Zm00001d026244	0
GO:0008184	glycogen phosphorylase activity	molecular_function	0.049449	1	1	783	2	26932	0		1	Zm00001d034074
GO:1901605	alpha-amino acid metabolic process	biological_process	0.049522	1	13	783	267	26932	7	Zm00001d028165,Zm00001d046923,Zm00001d026531,Zm00001d013644,Zm00001d051166,Zm00001d025333,Zm00001d048561	6	Zm00001d047981,Zm00001d008974,Zm00001d051194,Zm00001d003522,Zm00001d034461,Zm00001d023437
GO:0004729	oxygen-dependent protoporphyrinogen oxidase activity	molecular_function	0.04957	1	1	783	2	26932	1	Zm00001d008203	0
GO:0070818	protoporphyrinogen oxidase activity	molecular_function	0.04957	1	1	783	2	26932	1	Zm00001d008203	0
GO:0016838	carbon-oxygen lyase activity, acting on phosphates	molecular_function	0.050326	1	4	783	48	26932	4	Zm00001d024211,Zm00001d041082,Zm00001d029648,Zm00001d024208	0
GO:0010224	response to UV-B	biological_process	0.050879	1	2	783	13	26932	1	Zm00001d001960	1	Zm00001d014568
GO:0050242	pyruvate, phosphate dikinase activity	molecular_function	0.051788	1	1	783	2	26932	0		1	Zm00001d010321
GO:0002143	tRNA wobble position uridine thiolation	biological_process	0.051896	1	1	783	2	26932	0		1	Zm00001d051608
GO:0018192	enzyme active site formation via cysteine modification to L-cysteine persulfide	biological_process	0.051896	1	1	783	2	26932	0		1	Zm00001d051608
GO:0018307	enzyme active site formation	biological_process	0.051896	1	1	783	2	26932	0		1	Zm00001d051608
GO:0061604	molybdopterin-synthase sulfurtransferase activity	molecular_function	0.051896	1	1	783	2	26932	0		1	Zm00001d051608
GO:0061605	molybdopterin-synthase adenylyltransferase activity	molecular_function	0.051896	1	1	783	2	26932	0		1	Zm00001d051608
GO:0098822	peptidyl-cysteine modification to L-cysteine persulfide	biological_process	0.051896	1	1	783	2	26932	0		1	Zm00001d051608
GO:0042646	plastid nucleoid	cellular_component	0.052296	1	2	783	13	26932	2	Zm00001d043325,Zm00001d033181	0
GO:2000112	regulation of cellular macromolecule biosynthetic process	biological_process	0.052783	1	71	783	1988	26932	36	Zm00001d026305,Zm00001d020711,Zm00001d037607,Zm00001d013151,Novel01559,Zm00001d038023,Zm00001d043325,Zm00001d009619,Zm00001d039531,Zm00001d043094,Zm00001d026447,Zm00001d014885,Zm00001d041886,Zm00001d048991,Zm00001d016457,Zm00001d027530,Zm00001d019734,Zm00001d047523,Zm00001d029940,Novel01047,Zm00001d017462,Zm00001d009939,Zm00001d049743,Zm00001d019475,Zm00001d052564,Zm00001d022437,Zm00001d014628,Zm…	35	Zm00001d016277,Zm00001d045320,Novel00326,Zm00001d013126,Zm00001d027431,Zm00001d012413,Zm00001d008190,Zm00001d042463,Zm00001d051480,Zm00001d028603,Zm00001d041453,Zm00001d010634,Novel01082,Zm00001d044857,Zm00001d046751,Zm00001d046947,Zm00001d039032,Novel01032,Zm00001d008817,Zm00001d021268,Zm00001d039506,Zm00001d039077,Novel01406,Zm00001d017477,Zm00001d027925,Zm00001d001838,Zm00001d028984,Zm00001d00…
GO:0010091	trichome branching	biological_process	0.054193	1	1	783	2	26932	1	Zm00001d053926	0
GO:0004553	hydrolase activity, hydrolyzing O-glycosyl compounds	molecular_function	0.054347	1	19	783	439	26932	7	Zm00001d011886,Zm00001d049028,Zm00001d014842,Zm00001d025943,Zm00001d009936,Zm00001d015129,Zm00001d014840	12	Zm00001d046134,Zm00001d024037,Zm00001d003817,Zm00001d025354,Zm00001d013573,Zm00001d009876,Zm00001d015783,Zm00001d032090,Zm00001d012159,Zm00001d033649,Zm00001d024071,Zm00001d035899
GO:0009540	zeaxanthin epoxidase [overall] activity	molecular_function	0.055175	1	1	783	2	26932	0		1	Zm00001d025545
GO:0044435	plastid part	cellular_component	0.055498	1	17	783	378	26932	15	Zm00001d011069,Zm00001d047581,Zm00001d052410,Zm00001d025333,Zm00001d021962,Zm00001d021245,Zm00001d033181,Zm00001d016006,Zm00001d043325,Zm00001d045144,Zm00001d002490,Zm00001d020437,Zm00001d016714,Zm00001d004978,Zm00001d028338	2	Zm00001d045261,Zm00001d014744
GO:1904143	positive regulation of carotenoid biosynthetic process	biological_process	0.055978	1	1	783	2	26932	1	Zm00001d016714	0
GO:0009862	systemic acquired resistance, salicylic acid mediated signaling pathway	biological_process	0.05613	1	1	783	2	26932	1	Zm00001d028165	0
GO:1901002	positive regulation of response to salt stress	biological_process	0.057414	1	1	783	2	26932	0		1	Zm00001d026139
GO:0019752	carboxylic acid metabolic process	biological_process	0.057436	1	33	783	849	26932	17	Zm00001d016006,Zm00001d028165,Zm00001d016438,Zm00001d021962,Zm00001d008623,Zm00001d031449,Zm00001d005430,Zm00001d051166,Zm00001d048561,Zm00001d014945,Zm00001d026531,Zm00001d046923,Zm00001d025333,Zm00001d015037,Zm00001d010375,Zm00001d013644,Zm00001d024138	16	Zm00001d031241,Zm00001d010321,Zm00001d034461,Zm00001d031685,Zm00001d023437,Zm00001d013655,Zm00001d025690,Zm00001d022557,Zm00001d025170,Zm00001d040084,Zm00001d036206,Zm00001d008974,Zm00001d047981,Zm00001d051194,Zm00001d003522,Zm00001d025545
GO:0008792	arginine decarboxylase activity	molecular_function	0.058337	1	1	783	2	26932	0		1	Zm00001d051194
GO:0048656	anther wall tapetum formation	biological_process	0.058524	1	1	783	2	26932	0		1	Zm00001d053895
GO:0048657	anther wall tapetum cell differentiation	biological_process	0.058524	1	1	783	2	26932	0		1	Zm00001d053895
GO:0015846	polyamine transport	biological_process	0.058713	1	1	783	2	26932	1	Zm00001d026244	0
GO:0010556	regulation of macromolecule biosynthetic process	biological_process	0.058932	1	71	783	2001	26932	36	Zm00001d016457,Zm00001d048991,Zm00001d041886,Zm00001d014885,Zm00001d019734,Zm00001d027530,Zm00001d038023,Novel01559,Zm00001d013151,Zm00001d037607,Zm00001d020711,Zm00001d026305,Zm00001d026447,Zm00001d043094,Zm00001d039531,Zm00001d009619,Zm00001d043325,Zm00001d024768,Zm00001d043025,Zm00001d036364,Zm00001d015226,Zm00001d034920,Zm00001d050247,Zm00001d009939,Zm00001d017462,Zm00001d029940,Novel01047,Zm…	35	Zm00001d039032,Zm00001d046947,Zm00001d044857,Zm00001d046751,Zm00001d051480,Zm00001d042463,Zm00001d008190,Zm00001d027431,Zm00001d012413,Zm00001d013126,Novel00326,Zm00001d045320,Zm00001d016277,Zm00001d010634,Novel01082,Zm00001d041453,Zm00001d028603,Zm00001d006835,Zm00001d028984,Zm00001d001838,Zm00001d027925,Novel01406,Zm00001d017477,Zm00001d039077,Zm00001d026096,Zm00001d022526,Zm00001d034160,Zm0000…
GO:0003934	GTP cyclohydrolase I activity	molecular_function	0.059113	1	1	783	2	26932	1	Zm00001d026531	0
GO:0008534	oxidized purine nucleobase lesion DNA N-glycosylase activity	molecular_function	0.059471	1	1	783	2	26932	0		1	Zm00001d016801
GO:0006576	cellular biogenic amine metabolic process	biological_process	0.059675	1	5	783	72	26932	1	Novel01296	4	Zm00001d013655,Zm00001d051194,Zm00001d022557,Zm00001d034461
GO:0009410	response to xenobiotic stimulus	biological_process	0.060074	1	1	783	2	26932	1	Zm00001d024839	0
GO:0006022	aminoglycan metabolic process	biological_process	0.060149	1	3	783	30	26932	3	Zm00001d014842,Zm00001d014840,Zm00001d009936	0
GO:0005506	iron ion binding	molecular_function	0.060236	1	19	783	430	26932	17	Zm00001d014134,Zm00001d029822,Zm00001d042008,Zm00001d044156,Zm00001d029390,Zm00001d033152,Zm00001d034095,Zm00001d002937,Zm00001d013231,Zm00001d048819,Zm00001d012322,Zm00001d044157,Zm00001d046342,Zm00001d012304,Zm00001d034540,Zm00001d014958,Zm00001d032458	2	Zm00001d044120,Zm00001d020717
GO:0042742	defense response to bacterium	biological_process	0.06043	1	4	783	52	26932	4	Zm00001d011069,Zm00001d028165,Zm00001d048949,Zm00001d048950	0
GO:0050502	cis-zeatin O-beta-D-glucosyltransferase activity	molecular_function	0.060439	1	1	783	2	26932	1	Zm00001d012335	0
GO:0045117	azole transport	biological_process	0.060444	1	1	783	2	26932	0		1	Zm00001d008974
GO:0045118	azole transporter activity	molecular_function	0.060444	1	1	783	2	26932	0		1	Zm00001d008974
GO:0018023	peptidyl-lysine trimethylation	biological_process	0.060492	1	1	783	2	26932	1	Zm00001d020437	0
GO:0042710	biofilm formation	biological_process	0.060574	1	1	783	2	26932	0		1	Novel00972
GO:0030076	light-harvesting complex	cellular_component	0.06062	1	1	783	2	26932	1	Novel00001	0
GO:0030077	plasma membrane light-harvesting complex	cellular_component	0.06062	1	1	783	2	26932	1	Novel00001	0
GO:0042716	plasma membrane-derived chromatophore	cellular_component	0.06062	1	1	783	2	26932	1	Novel00001	0
GO:0008156	negative regulation of DNA replication	biological_process	0.060661	1	1	783	2	26932	1	Zm00001d014885	0
GO:2000104	negative regulation of DNA-dependent DNA replication	biological_process	0.060661	1	1	783	2	26932	1	Zm00001d014885	0
GO:0004719	protein-L-isoaspartate (D-aspartate) O-methyltransferase activity	molecular_function	0.060678	1	1	783	2	26932	0		1	Zm00001d049966
GO:0004879	RNA polymerase II transcription factor activity, ligand-activated sequence-specific DNA binding	molecular_function	0.060681	1	1	783	2	26932	1	Novel01047	0
GO:0004882	androgen receptor activity	molecular_function	0.060681	1	1	783	2	26932	1	Novel01047	0
GO:0030518	intracellular steroid hormone receptor signaling pathway	biological_process	0.060681	1	1	783	2	26932	1	Novel01047	0
GO:0030521	androgen receptor signaling pathway	biological_process	0.060681	1	1	783	2	26932	1	Novel01047	0
GO:0098531	transcription factor activity, direct ligand regulated sequence-specific DNA binding	molecular_function	0.060681	1	1	783	2	26932	1	Novel01047	0
GO:0004457	lactate dehydrogenase activity	molecular_function	0.060682	1	1	783	2	26932	1	Zm00001d014945	0
GO:0004459	L-lactate dehydrogenase activity	molecular_function	0.060682	1	1	783	2	26932	1	Zm00001d014945	0
GO:0033130	acetylcholine receptor binding	molecular_function	0.060682	1	1	783	2	26932	1	Novel00672	0
GO:0043495	protein anchor	molecular_function	0.060682	1	1	783	2	26932	1	Novel00672	0
GO:0003008	system process	biological_process	0.060682	1	1	783	2	26932	1	Novel01309	0
GO:0032299	ribonuclease H2 complex	cellular_component	0.060682	1	1	783	2	26932	0		1	Zm00001d015372
GO:0044057	regulation of system process	biological_process	0.060682	1	1	783	2	26932	1	Novel01309	0
GO:0090231	regulation of spindle checkpoint	biological_process	0.060682	1	1	783	2	26932	0		1	Zm00001d050944
GO:0090266	regulation of mitotic cell cycle spindle assembly checkpoint	biological_process	0.060682	1	1	783	2	26932	0		1	Zm00001d050944
GO:1901976	regulation of cell cycle checkpoint	biological_process	0.060682	1	1	783	2	26932	0		1	Zm00001d050944
GO:1903504	regulation of mitotic spindle checkpoint	biological_process	0.060682	1	1	783	2	26932	0		1	Zm00001d050944
GO:0005743	mitochondrial inner membrane	cellular_component	0.060756	1	6	783	93	26932	1	Novel00087	5	Zm00001d005695,Zm00001d015431,Zm00001d016619,Zm00001d016864,Zm00001d014772
GO:0015297	antiporter activity	molecular_function	0.061797	1	7	783	125	26932	4	Zm00001d021461,Zm00001d000196,Zm00001d041308,Zm00001d042692	3	Zm00001d021629,Zm00001d000195,Zm00001d028311
GO:0044106	cellular amine metabolic process	biological_process	0.06186	1	5	783	73	26932	1	Novel01296	4	Zm00001d034461,Zm00001d013655,Zm00001d022557,Zm00001d051194
GO:0015977	carbon fixation	biological_process	0.062126	1	2	783	15	26932	0		2	GRMZM5G815453,Zm00001d000279
GO:0016843	amine-lyase activity	molecular_function	0.062456	1	3	783	30	26932	0		3	Zm00001d013557,Zm00001d028140,Zm00001d020306
GO:0016844	strictosidine synthase activity	molecular_function	0.062456	1	3	783	30	26932	0		3	Zm00001d020306,Zm00001d028140,Zm00001d013557
GO:0022904	respiratory electron transport chain	biological_process	0.062767	1	3	783	31	26932	0		3	Novel00848,Zm00001d014772,Novel00789
GO:0003333	amino acid transmembrane transport	biological_process	0.062838	1	3	783	32	26932	0		3	Zm00001d033493,Zm00001d013652,Zm00001d008974
GO:0005740	mitochondrial envelope	cellular_component	0.063475	1	8	783	142	26932	1	Novel00087	7	Novel00092,Zm00001d016864,Zm00001d015431,Zm00001d005695,Zm00001d048583,Zm00001d016619,Zm00001d014772
GO:0042440	pigment metabolic process	biological_process	0.063546	1	5	783	73	26932	2	Novel01160,Zm00001d016714	3	Zm00001d031934,Zm00001d049541,Zm00001d013013
GO:0046906	tetrapyrrole binding	molecular_function	0.064075	1	25	783	596	26932	20	Zm00001d033152,Zm00001d002937,Zm00001d034095,Zm00001d016802,Zm00001d013231,Zm00001d030685,Zm00001d048819,Zm00001d044157,Zm00001d012322,Zm00001d046342,Zm00001d024752,Zm00001d012304,Zm00001d014958,Zm00001d032458,Zm00001d054044,Zm00001d040705,Zm00001d014134,Zm00001d029822,Zm00001d044156,Zm00001d029390	5	Zm00001d020717,Zm00001d044120,Zm00001d053839,Zm00001d009373,Zm00001d042600
GO:0022900	electron transport chain	biological_process	0.065728	1	5	783	74	26932	0		5	Novel00848,Zm00001d038291,Zm00001d016864,Zm00001d014772,Novel00789
GO:0071705	nitrogen compound transport	biological_process	0.066205	1	7	783	122	26932	1	Zm00001d026244	6	Zm00001d019225,Zm00001d033493,Zm00001d012953,Zm00001d013652,Zm00001d008974,Zm00001d017249
GO:0009295	nucleoid	cellular_component	0.067141	1	2	783	15	26932	2	Zm00001d033181,Zm00001d043325	0
GO:0009095	aromatic amino acid family biosynthetic process, prephenate pathway	biological_process	0.069094	1	2	783	15	26932	2	Zm00001d025333,Zm00001d048561	0
GO:0043436	oxoacid metabolic process	biological_process	0.069605	1	33	783	865	26932	17	Zm00001d024138,Zm00001d013644,Zm00001d010375,Zm00001d015037,Zm00001d025333,Zm00001d046923,Zm00001d026531,Zm00001d014945,Zm00001d048561,Zm00001d051166,Zm00001d005430,Zm00001d031449,Zm00001d008623,Zm00001d021962,Zm00001d016438,Zm00001d016006,Zm00001d028165	16	Zm00001d025545,Zm00001d003522,Zm00001d051194,Zm00001d047981,Zm00001d008974,Zm00001d036206,Zm00001d040084,Zm00001d025170,Zm00001d022557,Zm00001d025690,Zm00001d023437,Zm00001d013655,Zm00001d031685,Zm00001d034461,Zm00001d010321,Zm00001d031241
GO:0044249	cellular biosynthetic process	biological_process	0.069974	1	146	783	4447	26932	75	Zm00001d013151,Zm00001d016866,Zm00001d038023,Zm00001d016006,Zm00001d027919,Zm00001d020711,Zm00001d031449,Zm00001d005430,Zm00001d036129,Zm00001d026685,Zm00001d033181,Zm00001d007092,Zm00001d014885,Zm00001d003411,Zm00001d013644,Zm00001d019734,Novel00672,Zm00001d021962,Zm00001d016438,Zm00001d017462,Zm00001d028165,Zm00001d009939,Zm00001d006596,Zm00001d002358,Zm00001d005030,Novel01047,Zm00001d008623,Zm…	71	Zm00001d042463,Zm00001d051480,Zm00001d031241,Zm00001d015917,Novel01548,Zm00001d027431,Zm00001d003817,Novel01082,Zm00001d014568,Zm00001d044857,Zm00001d041389,Zm00001d046947,Zm00001d051194,Zm00001d008974,Zm00001d035916,Zm00001d049541,Novel01032,Zm00001d037868,Zm00001d008817,Novel00549,Zm00001d045876,Zm00001d013013,Zm00001d019479,Zm00001d039506,Zm00001d013655,Zm00001d012707,Zm00001d044321,Zm00001d02…
GO:0004129	cytochrome-c oxidase activity	molecular_function	0.070218	1	2	783	15	26932	0		2	Zm00001d051055,Novel01064
GO:0015002	heme-copper terminal oxidase activity	molecular_function	0.070218	1	2	783	15	26932	0		2	Novel01064,Zm00001d051055
GO:0016675	oxidoreductase activity, acting on a heme group of donors	molecular_function	0.070218	1	2	783	15	26932	0		2	Zm00001d051055,Novel01064
GO:0016676	oxidoreductase activity, acting on a heme group of donors, oxygen as acceptor	molecular_function	0.070218	1	2	783	15	26932	0		2	Zm00001d051055,Novel01064
GO:0015995	chlorophyll biosynthetic process	biological_process	0.070268	1	2	783	15	26932	1	Novel01160	1	Zm00001d013013
GO:0098661	inorganic anion transmembrane transport	biological_process	0.070659	1	2	783	16	26932	0		2	Zm00001d000204,Zm00001d028164
GO:0010021	amylopectin biosynthetic process	biological_process	0.071127	1	1	783	3	26932	0		1	Zm00001d045261
GO:2000896	amylopectin metabolic process	biological_process	0.071127	1	1	783	3	26932	0		1	Zm00001d045261
GO:0006082	organic acid metabolic process	biological_process	0.071382	1	33	783	867	26932	17	Zm00001d021962,Zm00001d016438,Zm00001d016006,Zm00001d028165,Zm00001d031449,Zm00001d008623,Zm00001d051166,Zm00001d005430,Zm00001d014945,Zm00001d048561,Zm00001d015037,Zm00001d025333,Zm00001d046923,Zm00001d026531,Zm00001d010375,Zm00001d024138,Zm00001d013644	16	Zm00001d010321,Zm00001d031241,Zm00001d034461,Zm00001d031685,Zm00001d013655,Zm00001d023437,Zm00001d022557,Zm00001d025690,Zm00001d036206,Zm00001d040084,Zm00001d025170,Zm00001d051194,Zm00001d047981,Zm00001d008974,Zm00001d025545,Zm00001d003522
GO:0016798	hydrolase activity, acting on glycosyl bonds	molecular_function	0.071991	1	20	783	483	26932	7	Zm00001d015129,Zm00001d014840,Zm00001d009936,Zm00001d025943,Zm00001d049028,Zm00001d014842,Zm00001d011886	13	Zm00001d035899,Zm00001d024071,Zm00001d016801,Zm00001d033649,Zm00001d012159,Zm00001d032090,Zm00001d013573,Zm00001d009876,Zm00001d015783,Zm00001d003817,Zm00001d025354,Zm00001d046134,Zm00001d024037
GO:0042775	mitochondrial ATP synthesis coupled electron transport	biological_process	0.073163	1	2	783	15	26932	0		2	Novel00789,Zm00001d014772
GO:0051171	regulation of nitrogen compound metabolic process	biological_process	0.073327	1	71	783	2030	26932	36	Zm00001d015226,Zm00001d034920,Zm00001d050247,Zm00001d036364,Zm00001d043025,Zm00001d024768,Zm00001d052564,Zm00001d019475,Zm00001d022437,Zm00001d014628,Zm00001d017130,Novel01202,Zm00001d043663,Zm00001d049743,Zm00001d009939,Zm00001d017462,Zm00001d047523,Novel01047,Zm00001d029940,Zm00001d019734,Zm00001d027530,Zm00001d048991,Zm00001d016457,Zm00001d014885,Zm00001d041886,Zm00001d043094,Zm00001d026447,Zm…	35	Zm00001d022526,Zm00001d026096,Zm00001d032144,Zm00001d026182,Zm00001d012128,Zm00001d016298,Zm00001d034160,Zm00001d006835,Zm00001d028984,Novel01406,Zm00001d017477,Zm00001d039077,Zm00001d027925,Zm00001d001838,Zm00001d039506,Zm00001d021268,Novel01032,Zm00001d008817,Zm00001d039032,Zm00001d046751,Zm00001d044857,Zm00001d046947,Zm00001d028603,Zm00001d041453,Novel01082,Zm00001d010634,Zm00001d042463,Zm0000…
GO:1903825	organic acid transmembrane transport	biological_process	0.073441	1	3	783	34	26932	0		3	Zm00001d033493,Zm00001d013652,Zm00001d008974
GO:0046148	pigment biosynthetic process	biological_process	0.073449	1	4	783	54	26932	2	Novel01160,Zm00001d016714	2	Zm00001d049541,Zm00001d013013
GO:0009058	biosynthetic process	biological_process	0.074564	1	154	783	4721	26932	76	Zm00001d041886,Zm00001d026531,Zm00001d046923,Zm00001d016457,Zm00001d025333,Zm00001d015037,Zm00001d048991,Zm00001d027530,Zm00001d011596,Zm00001d015204,Zm00001d037607,Zm00001d026305,Novel01559,Zm00001d027271,Zm00001d039531,Zm00001d009619,Zm00001d043325,Zm00001d034724,Zm00001d026060,Zm00001d026447,Zm00001d051166,Zm00001d018096,Zm00001d043094,Zm00001d008370,Zm00001d012335,Zm00001d024768,Zm00001d03636…	78	Zm00001d046751,Zm00001d039032,Novel00972,Zm00001d013052,Zm00001d008190,Zm00001d012413,Zm00001d013126,Novel00326,Zm00001d045320,Zm00001d016277,Zm00001d016850,Zm00001d010634,Zm00001d041453,Zm00001d028603,Zm00001d014292,Novel01406,Zm00001d017477,Zm00001d039077,Zm00001d006835,Zm00001d022557,Zm00001d012128,Zm00001d013035,Zm00001d024029,Zm00001d044566,Zm00001d046127,Zm00001d032144,Zm00001d034461,Zm0000…
GO:0030863	cortical cytoskeleton	cellular_component	0.076763	1	1	783	3	26932	0		1	Novel01812
GO:0003871	5-methyltetrahydropteroyltriglutamate-homocysteine S-methyltransferase activity	molecular_function	0.076849	1	1	783	3	26932	1	Zm00001d013644	0
GO:0042085	5-methyltetrahydropteroyltri-L-glutamate-dependent methyltransferase activity	molecular_function	0.076849	1	1	783	3	26932	1	Zm00001d013644	0
GO:0009064	glutamine family amino acid metabolic process	biological_process	0.077319	1	4	783	57	26932	0		4	Zm00001d003522,Zm00001d047981,Zm00001d008974,Zm00001d051194
GO:0080090	regulation of primary metabolic process	biological_process	0.077768	1	77	783	2223	26932	39	Zm00001d036364,Zm00001d024768,Zm00001d043025,Zm00001d016714,Zm00001d015226,Zm00001d050247,Zm00001d034920,Zm00001d037969,Zm00001d047523,Novel01047,Zm00001d029940,Zm00001d009939,Zm00001d017462,Zm00001d049743,Zm00001d022437,Zm00001d052564,Zm00001d026360,Zm00001d019475,Novel01202,Zm00001d017130,Zm00001d043663,Zm00001d014628,Zm00001d041886,Zm00001d014885,Zm00001d016457,Zm00001d048991,Zm00001d027530,Zm…	38	Zm00001d027925,Zm00001d017477,Novel01406,Zm00001d039077,Zm00001d001838,Zm00001d006835,Zm00001d028984,Zm00001d032144,Zm00001d026182,Zm00001d034160,Zm00001d012128,Zm00001d016298,Zm00001d022526,Zm00001d026096,Zm00001d042867,Novel01032,Zm00001d008817,Novel01090,Zm00001d021268,Zm00001d050944,Zm00001d039506,Zm00001d044857,Zm00001d046751,Zm00001d046947,Zm00001d039032,Novel00326,Zm00001d045320,Zm00001d01…
GO:0044429	mitochondrial part	cellular_component	0.077993	1	9	783	174	26932	2	Novel00087,Zm00001d017187	7	Novel00092,Zm00001d015431,Zm00001d016864,Zm00001d005695,Zm00001d048583,Zm00001d016619,Zm00001d014772
GO:0016614	oxidoreductase activity, acting on CH-OH group of donors	molecular_function	0.078141	1	11	783	231	26932	9	Zm00001d025288,Zm00001d046923,Zm00001d008427,Zm00001d037005,Zm00001d032046,Zm00001d027271,Zm00001d014945,Zm00001d051130,Zm00001d014919	2	Zm00001d025690,Zm00001d017598
GO:0042537	benzene-containing compound metabolic process	biological_process	0.078623	1	2	783	16	26932	2	Zm00001d051166,Zm00001d016006	0
GO:1901681	sulfur compound binding	molecular_function	0.078639	1	3	783	35	26932	2	Novel00672,Zm00001d024839	1	Zm00001d024518
GO:0005680	anaphase-promoting complex	cellular_component	0.078896	1	2	783	16	26932	0		2	Zm00001d050944,Novel01090
GO:1901576	organic substance biosynthetic process	biological_process	0.078955	1	148	783	4539	26932	75	Zm00001d016963,Zm00001d029940,Zm00001d047523,Zm00001d017130,Zm00001d043663,Zm00001d014628,Zm00001d022437,Zm00001d019475,Zm00001d052564,Zm00001d049743,Zm00001d048561,Zm00001d024768,Zm00001d036364,Zm00001d008370,Zm00001d012335,Zm00001d015226,Zm00001d008427,Zm00001d034920,Zm00001d016714,Novel01559,Zm00001d037607,Zm00001d026305,Zm00001d034724,Zm00001d051166,Zm00001d026447,Zm00001d043094,Zm00001d01809…	73	Zm00001d034461,Zm00001d045261,Zm00001d051608,Zm00001d031685,Zm00001d021268,Zm00001d006835,Zm00001d022557,Zm00001d014292,Zm00001d039077,Novel01406,Zm00001d017477,Zm00001d012128,Zm00001d044566,Zm00001d013035,Zm00001d024029,Zm00001d046127,Zm00001d032144,Zm00001d012413,Zm00001d008190,Zm00001d013126,Novel00326,Zm00001d016277,Zm00001d045320,Zm00001d016850,Zm00001d010634,Zm00001d041453,Zm00001d028603,Zm…
GO:0005102	receptor binding	molecular_function	0.080364	1	3	783	34	26932	1	Novel00672	2	Novel01469,Novel01103
GO:0003774	motor activity	molecular_function	0.080877	1	6	783	119	26932	2	Zm00001d029390,Zm00001d002937	4	Zm00001d003690,Zm00001d023840,Zm00001d013276,Zm00001d045759
GO:0046577	long-chain-alcohol oxidase activity	molecular_function	0.081153	1	1	783	3	26932	1	Zm00001d051130	0
GO:0044434	chloroplast part	cellular_component	0.081514	1	16	783	370	26932	14	Zm00001d028338,Zm00001d020437,Zm00001d016714,Zm00001d004978,Zm00001d045144,Zm00001d002490,Zm00001d033181,Zm00001d016006,Zm00001d047581,Zm00001d052410,Zm00001d025333,Zm00001d021245,Zm00001d021962,Zm00001d011069	2	Zm00001d014744,Zm00001d045261
GO:0016840	carbon-nitrogen lyase activity	molecular_function	0.082662	1	4	783	55	26932	1	Zm00001d051166	3	Zm00001d028140,Zm00001d020306,Zm00001d013557
GO:0004364	glutathione transferase activity	molecular_function	0.083418	1	2	783	16	26932	2	Zm00001d018220,Zm00001d024839	0
GO:0070569	uridylyltransferase activity	molecular_function	0.083836	1	2	783	17	26932	0		2	Zm00001d014674,Zm00001d015008
GO:0019866	organelle inner membrane	cellular_component	0.083932	1	6	783	102	26932	1	Novel00087	5	Zm00001d016619,Zm00001d014772,Zm00001d016864,Zm00001d015431,Zm00001d005695
GO:0000152	nuclear ubiquitin ligase complex	cellular_component	0.084354	1	2	783	17	26932	0		2	Novel01090,Zm00001d050944
GO:0003707	steroid hormone receptor activity	molecular_function	0.08457	1	1	783	3	26932	1	Novel01047	0
GO:0005496	steroid binding	molecular_function	0.08457	1	1	783	3	26932	1	Novel01047	0
GO:0016853	isomerase activity	molecular_function	0.084701	1	17	783	403	26932	10	Zm00001d016786,Zm00001d017720,Zm00001d036396,Zm00001d008209,Zm00001d054015,Zm00001d015747,Zm00001d008440,Zm00001d035081,Zm00001d008427,Zm00001d053652	7	Zm00001d021050,Zm00001d014292,Zm00001d039866,Zm00001d016660,Zm00001d050635,Zm00001d012972,Zm00001d030339
GO:0009863	salicylic acid mediated signaling pathway	biological_process	0.084839	1	1	783	3	26932	1	Zm00001d028165	0
GO:0045828	positive regulation of isoprenoid metabolic process	biological_process	0.085032	1	1	783	3	26932	1	Zm00001d016714	0
GO:0045834	positive regulation of lipid metabolic process	biological_process	0.085032	1	1	783	3	26932	1	Zm00001d016714	0
GO:0046889	positive regulation of lipid biosynthetic process	biological_process	0.085032	1	1	783	3	26932	1	Zm00001d016714	0
GO:0000427	plastid-encoded plastid RNA polymerase complex	cellular_component	0.085293	1	1	783	3	26932	1	Zm00001d043325	0
GO:0060590	ATPase regulator activity	molecular_function	0.085338	1	2	783	16	26932	1	Zm00001d017187	1	Novel01815
GO:0031323	regulation of cellular metabolic process	biological_process	0.085995	1	77	783	2236	26932	39	Zm00001d026447,Zm00001d043094,Zm00001d039531,Zm00001d043325,Zm00001d009619,Zm00001d013151,Novel01559,Zm00001d038023,Zm00001d020711,Zm00001d026305,Zm00001d037607,Zm00001d019734,Zm00001d027530,Zm00001d016457,Zm00001d048991,Zm00001d041886,Zm00001d014885,Zm00001d022437,Zm00001d019475,Zm00001d026360,Zm00001d052564,Zm00001d043663,Zm00001d017130,Novel01202,Zm00001d014628,Zm00001d049743,Zm00001d017462,Zm…	38	Zm00001d041453,Zm00001d028603,Novel01082,Zm00001d010634,Zm00001d042463,Zm00001d051480,Novel00326,Zm00001d016277,Zm00001d045320,Zm00001d027431,Zm00001d012413,Zm00001d008190,Zm00001d013126,Zm00001d039032,Zm00001d044857,Zm00001d046751,Zm00001d046947,Zm00001d050944,Zm00001d039506,Zm00001d021268,Novel01032,Novel01090,Zm00001d008817,Zm00001d042867,Zm00001d022526,Zm00001d026096,Zm00001d026182,Zm00001d03…
GO:0043295	glutathione binding	molecular_function	0.08613	1	1	783	3	26932	1	Zm00001d024839	0
GO:1900750	oligopeptide binding	molecular_function	0.08613	1	1	783	3	26932	1	Zm00001d024839	0
GO:0006002	fructose 6-phosphate metabolic process	biological_process	0.086146	1	2	783	17	26932	1	Zm00001d010375	1	Zm00001d036206
GO:0048654	anther morphogenesis	biological_process	0.086159	1	1	783	3	26932	0		1	Zm00001d053895
GO:0048655	anther wall tapetum morphogenesis	biological_process	0.086159	1	1	783	3	26932	0		1	Zm00001d053895
GO:0006351	transcription, DNA-templated	biological_process	0.086219	1	73	783	2117	26932	36	Zm00001d017462,Zm00001d009939,Zm00001d047523,Zm00001d029940,Novel01047,Zm00001d019475,Zm00001d052564,Zm00001d022437,Zm00001d014628,Novel01202,Zm00001d043663,Zm00001d017130,Zm00001d049743,Zm00001d036364,Zm00001d043025,Zm00001d024768,Zm00001d034920,Zm00001d050247,Zm00001d015226,Zm00001d013151,Novel01559,Zm00001d038023,Zm00001d026305,Zm00001d020711,Zm00001d037607,Zm00001d043094,Zm00001d026447,Zm0000…	37	Novel01032,Zm00001d008817,Zm00001d039506,Zm00001d021268,Zm00001d028984,Zm00001d006835,Zm00001d039077,Novel01406,Zm00001d017477,Zm00001d027925,Zm00001d001838,Zm00001d022526,Zm00001d026096,Zm00001d026421,Zm00001d026182,Zm00001d032144,Zm00001d016298,Zm00001d012128,Zm00001d034160,Zm00001d042463,Zm00001d051480,Novel01548,Zm00001d016277,Zm00001d045320,Novel00326,Zm00001d013126,Zm00001d012413,Zm00001d02…
GO:1901000	regulation of response to salt stress	biological_process	0.086424	1	1	783	3	26932	0		1	Zm00001d026139
GO:0015173	aromatic amino acid transmembrane transporter activity	molecular_function	0.087175	1	1	783	3	26932	0		1	Zm00001d019225
GO:0015801	aromatic amino acid transport	biological_process	0.087175	1	1	783	3	26932	0		1	Zm00001d019225
GO:0030785	[ribulose-bisphosphate carboxylase]-lysine N-methyltransferase activity	molecular_function	0.08746	1	1	783	3	26932	1	Zm00001d020437	0
GO:0098656	anion transmembrane transport	biological_process	0.087523	1	5	783	85	26932	0		5	Zm00001d008974,Zm00001d013652,Zm00001d033493,Zm00001d028164,Zm00001d000204
GO:0048455	stamen formation	biological_process	0.087538	1	1	783	3	26932	0		1	Zm00001d053895
GO:0002064	epithelial cell development	biological_process	0.087742	1	1	783	3	26932	0		1	Novel01469
GO:0002065	columnar/cuboidal epithelial cell differentiation	biological_process	0.087742	1	1	783	3	26932	0		1	Novel01469
GO:0002066	columnar/cuboidal epithelial cell development	biological_process	0.087742	1	1	783	3	26932	0		1	Novel01469
GO:0005213	structural constituent of chorion	molecular_function	0.087742	1	1	783	3	26932	0		1	Novel01469
GO:0007281	germ cell development	biological_process	0.087742	1	1	783	3	26932	0		1	Novel01469
GO:0007292	female gamete generation	biological_process	0.087742	1	1	783	3	26932	0		1	Novel01469
GO:0007304	chorion-containing eggshell formation	biological_process	0.087742	1	1	783	3	26932	0		1	Novel01469
GO:0030703	eggshell formation	biological_process	0.087742	1	1	783	3	26932	0		1	Novel01469
GO:0030707	ovarian follicle cell development	biological_process	0.087742	1	1	783	3	26932	0		1	Novel01469
GO:0042600	chorion	cellular_component	0.087742	1	1	783	3	26932	0		1	Novel01469
GO:0048477	oogenesis	biological_process	0.087742	1	1	783	3	26932	0		1	Novel01469
GO:0006177	GMP biosynthetic process	biological_process	0.087928	1	1	783	3	26932	1	Zm00001d026685	0
GO:0031647	regulation of protein stability	biological_process	0.088101	1	1	783	3	26932	1	Zm00001d016714	0
GO:0050821	protein stabilization	biological_process	0.088101	1	1	783	3	26932	1	Zm00001d016714	0
GO:0000702	oxidized base lesion DNA N-glycosylase activity	molecular_function	0.08839	1	1	783	3	26932	0		1	Zm00001d016801
GO:1901564	organonitrogen compound metabolic process	biological_process	0.088536	1	71	783	2050	26932	36	Zm00001d032046,Zm00001d048561,Novel01160,Zm00001d016963,Zm00001d028165,Zm00001d006596,Zm00001d014840,Zm00001d021962,Novel01296,Zm00001d002358,Zm00001d005030,Zm00001d008203,Zm00001d024138,Zm00001d028083,Zm00001d009936,Zm00001d034724,Zm00001d014842,Zm00001d018096,Zm00001d051166,Zm00001d026685,Zm00001d027271,Zm00001d036129,Zm00001d027919,Zm00001d016006,Zm00001d016866,Zm00001d015204,Zm00001d013644,Zm…	35	Zm00001d031934,Zm00001d031685,Novel00789,Zm00001d013013,Zm00001d012707,Zm00001d013655,Zm00001d023437,Novel00549,Zm00001d045876,Zm00001d037868,Zm00001d049541,Zm00001d034461,Zm00001d051634,Zm00001d051608,Zm00001d047981,Zm00001d014873,Zm00001d024029,Zm00001d003522,Zm00001d026277,Zm00001d022557,Zm00001d044321,Zm00001d040084,Zm00001d014772,Zm00001d016850,Zm00001d031241,Zm00001d045320,Zm00001d015917,Zm…
GO:0016630	protochlorophyllide reductase activity	molecular_function	0.089205	1	1	783	3	26932	0		1	Zm00001d001820
GO:0055036	virion membrane	cellular_component	0.089223	1	1	783	3	26932	1	Novel00755	0
GO:0008152	metabolic process	biological_process	0.08927	1	423	783	13951	26932	213	Zm00001d028083,Zm00001d018181,Zm00001d024138,Zm00001d037969,Zm00001d008203,Zm00001d026300,Novel00029,Zm00001d051323,Zm00001d044765,Zm00001d007486,Zm00001d031813,Zm00001d013231,Zm00001d006678,Zm00001d048087,Zm00001d029648,Zm00001d017418,Zm00001d002358,Zm00001d005030,Zm00001d047634,Zm00001d008623,Zm00001d042740,Zm00001d025255,Zm00001d016438,Zm00001d006126,Zm00001d054015,Zm00001d041082,Zm00001d01512…	210	Zm00001d050712,Zm00001d025545,Zm00001d009876,Zm00001d030339,Zm00001d022254,Zm00001d051252,Zm00001d005859,Zm00001d022526,Zm00001d026096,Zm00001d026421,Zm00001d032703,Zm00001d001838,Zm00001d015221,Zm00001d044321,Zm00001d026277,Zm00001d051015,Zm00001d015783,Zm00001d023437,Zm00001d017416,Novel00789,Zm00001d017598,Zm00001d013013,Zm00001d024037,Zm00001d032992,Zm00001d039506,Zm00001d031934,Zm00001d02639…
GO:0045005	DNA-dependent DNA replication maintenance of fidelity	biological_process	0.089483	1	1	783	3	26932	1	Zm00001d014885	0
GO:0030186	melatonin metabolic process	biological_process	0.089498	1	1	783	3	26932	0		1	Zm00001d049541
GO:0030187	melatonin biosynthetic process	biological_process	0.089498	1	1	783	3	26932	0		1	Zm00001d049541
GO:0043138	3'-5' DNA helicase activity	molecular_function	0.089608	1	1	783	4	26932	0		1	Zm00001d015212
GO:0005793	endoplasmic reticulum-Golgi intermediate compartment	cellular_component	0.08963	1	1	783	3	26932	0		1	Zm00001d025660
GO:0030366	molybdopterin synthase activity	molecular_function	0.08963	1	1	783	3	26932	0		1	Zm00001d016850
GO:0031429	box H/ACA snoRNP complex	cellular_component	0.08963	1	1	783	3	26932	1	Zm00001d052952	0
GO:0033116	endoplasmic reticulum-Golgi intermediate compartment membrane	cellular_component	0.08963	1	1	783	3	26932	0		1	Zm00001d025660
GO:0072588	box H/ACA RNP complex	cellular_component	0.08963	1	1	783	3	26932	1	Zm00001d052952	0
GO:1901136	carbohydrate derivative catabolic process	biological_process	0.089997	1	3	783	36	26932	3	Zm00001d014842,Zm00001d014840,Zm00001d009936	0
GO:0015074	DNA integration	biological_process	0.090236	1	2	783	19	26932	0		2	Novel00159,Novel01090
GO:0009617	response to bacterium	biological_process	0.091211	1	4	783	60	26932	4	Zm00001d048950,Zm00001d011069,Zm00001d048949,Zm00001d028165	0
GO:0008483	transaminase activity	molecular_function	0.091292	1	5	783	81	26932	2	Zm00001d008700,Zm00001d028165	3	Zm00001d015445,Zm00001d037507,Zm00001d015444
GO:0016769	transferase activity, transferring nitrogenous groups	molecular_function	0.091292	1	5	783	81	26932	2	Zm00001d028165,Zm00001d008700	3	Zm00001d015445,Zm00001d037507,Zm00001d015444
GO:0008509	anion transmembrane transporter activity	molecular_function	0.09159	1	6	783	111	26932	0		6	Zm00001d028164,Zm00001d019225,Zm00001d033493,Zm00001d000204,Zm00001d008974,Zm00001d013652
GO:0003684	damaged DNA binding	molecular_function	0.091771	1	2	783	19	26932	0		2	Zm00001d016801,Zm00001d014568
GO:0016781	phosphotransferase activity, paired acceptors	molecular_function	0.092845	1	1	783	4	26932	0		1	Zm00001d010321
GO:0003844	1,4-alpha-glucan branching enzyme activity	molecular_function	0.092949	1	1	783	4	26932	0		1	Zm00001d003817
GO:0018193	peptidyl-amino acid modification	biological_process	0.093452	1	11	783	246	26932	5	Zm00001d008209,Zm00001d020437,Zm00001d053652,Zm00001d054015,Zm00001d008440	6	Zm00001d004109,Zm00001d016660,Zm00001d050635,Zm00001d051608,Zm00001d024744,Zm00001d030339
GO:0009055	electron carrier activity	molecular_function	0.093814	1	11	783	233	26932	2	Novel00001,Zm00001d031257	9	Zm00001d023873,Novel00894,Zm00001d038291,Zm00001d023869,Zm00001d033711,Zm00001d020794,Zm00001d042600,Zm00001d051055,Novel01064
GO:0048037	cofactor binding	molecular_function	0.096628	1	23	783	585	26932	12	Zm00001d008427,Zm00001d016841,Zm00001d026060,Zm00001d032046,Zm00001d030090,Zm00001d014919,Zm00001d025288,Zm00001d046923,Zm00001d028165,Zm00001d037005,Zm00001d007644,Zm00001d051130	11	Zm00001d047981,Zm00001d017598,Zm00001d024518,Zm00001d003522,Zm00001d043619,Zm00001d025545,Zm00001d015444,Zm00001d015445,Zm00001d039487,Zm00001d037507,Zm00001d034074
GO:1901606	alpha-amino acid catabolic process	biological_process	0.098365	1	3	783	38	26932	1	Zm00001d051166	2	Zm00001d051194,Zm00001d023437
GO:0097659	nucleic acid-templated transcription	biological_process	0.098733	1	73	783	2137	26932	36	Zm00001d034920,Zm00001d015226,Zm00001d050247,Zm00001d043025,Zm00001d024768,Zm00001d036364,Zm00001d014628,Zm00001d043663,Zm00001d017130,Novel01202,Zm00001d019475,Zm00001d052564,Zm00001d022437,Zm00001d049743,Zm00001d017462,Zm00001d009939,Zm00001d029940,Novel01047,Zm00001d047523,Zm00001d019734,Zm00001d027530,Zm00001d033181,Zm00001d048991,Zm00001d016457,Zm00001d041886,Zm00001d043094,Zm00001d026447,Zm…	37	Zm00001d026096,Zm00001d026421,Zm00001d022526,Zm00001d012128,Zm00001d016298,Zm00001d034160,Zm00001d026182,Zm00001d032144,Zm00001d028984,Zm00001d006835,Zm00001d001838,Zm00001d039077,Zm00001d017477,Novel01406,Zm00001d027925,Zm00001d039506,Zm00001d021268,Zm00001d008817,Novel01032,Zm00001d039032,Zm00001d046947,Zm00001d044857,Zm00001d046751,Zm00001d010634,Novel01082,Zm00001d028603,Zm00001d041453,Zm0000…
GO:0071229	cellular response to acid chemical	biological_process	0.099026	1	3	783	40	26932	1	Zm00001d028165	2	Novel00972,Zm00001d015212
GO:0004096	catalase activity	molecular_function	0.099381	1	1	783	4	26932	1	Zm00001d054044	0
GO:0009411	response to UV	biological_process	0.099843	1	2	783	20	26932	1	Zm00001d001960	1	Zm00001d014568
GO:0071949	FAD binding	molecular_function	0.10102	1	2	783	19	26932	1	Zm00001d016841	1	Zm00001d025545
GO:0004645	phosphorylase activity	molecular_function	0.10221	1	1	783	4	26932	0		1	Zm00001d034074
GO:0003983	UTP:glucose-1-phosphate uridylyltransferase activity	molecular_function	0.10278	1	1	783	4	26932	0		1	Zm00001d015008
GO:0051748	UTP-monosaccharide-1-phosphate uridylyltransferase activity	molecular_function	0.10278	1	1	783	4	26932	0		1	Zm00001d015008
GO:0009073	aromatic amino acid family biosynthetic process	biological_process	0.10311	1	4	783	60	26932	3	Zm00001d025333,Zm00001d048561,Zm00001d016006	1	Zm00001d034461
GO:0035251	UDP-glucosyltransferase activity	molecular_function	0.10463	1	6	783	123	26932	1	Zm00001d012335	5	Zm00001d002256,Zm00001d044566,Zm00001d046127,Zm00001d045261,Zm00001d019479
GO:0004829	threonine-tRNA ligase activity	molecular_function	0.105	1	1	783	4	26932	1	Zm00001d021962	0
GO:0006435	threonyl-tRNA aminoacylation	biological_process	0.105	1	1	783	4	26932	1	Zm00001d021962	0
GO:0008172	S-methyltransferase activity	molecular_function	0.10524	1	1	783	4	26932	1	Zm00001d013644	0
GO:0006662	glycerol ether metabolic process	biological_process	0.10537	1	3	783	38	26932	1	Zm00001d051851	2	Zm00001d052769,Zm00001d052034
GO:0018904	ether metabolic process	biological_process	0.10537	1	3	783	38	26932	1	Zm00001d051851	2	Zm00001d052769,Zm00001d052034
GO:0016851	magnesium chelatase activity	molecular_function	0.10594	1	1	783	4	26932	0		1	Zm00001d013013
GO:0051002	ligase activity, forming nitrogen-metal bonds	molecular_function	0.10594	1	1	783	4	26932	0		1	Zm00001d013013
GO:0051003	ligase activity, forming nitrogen-metal bonds, forming coordination complexes	molecular_function	0.10594	1	1	783	4	26932	0		1	Zm00001d013013
GO:0009507	chloroplast	cellular_component	0.10594	1	26	783	685	26932	19	Zm00001d047581,Zm00001d025333,Zm00001d052410,Zm00001d021962,Zm00001d021245,Zm00001d026016,Zm00001d054015,Zm00001d033181,Zm00001d016006,Zm00001d011069,Zm00001d038606,Zm00001d020437,Zm00001d016714,Zm00001d004978,Zm00001d028338,Zm00001d043325,Zm00001d034887,Zm00001d045144,Zm00001d002490	7	Zm00001d045261,Zm00001d025170,Zm00001d013013,Zm00001d014744,Zm00001d019479,Zm00001d025545,Zm00001d038291
GO:0032774	RNA biosynthetic process	biological_process	0.1065	1	73	783	2148	26932	36	Zm00001d014628,Novel01202,Zm00001d017130,Zm00001d043663,Zm00001d019475,Zm00001d052564,Zm00001d022437,Zm00001d049743,Zm00001d017462,Zm00001d009939,Novel01047,Zm00001d029940,Zm00001d047523,Zm00001d034920,Zm00001d050247,Zm00001d015226,Zm00001d043025,Zm00001d024768,Zm00001d036364,Zm00001d043094,Zm00001d026447,Zm00001d043325,Zm00001d009619,Zm00001d039531,Zm00001d038023,Zm00001d013151,Novel01559,Zm0000…	37	Zm00001d039506,Zm00001d021268,Zm00001d008817,Novel01032,Zm00001d026096,Zm00001d026421,Zm00001d022526,Zm00001d016298,Zm00001d012128,Zm00001d034160,Zm00001d026182,Zm00001d032144,Zm00001d028984,Zm00001d006835,Zm00001d001838,Zm00001d039077,Zm00001d017477,Novel01406,Zm00001d027925,Novel01082,Zm00001d010634,Zm00001d028603,Zm00001d041453,Zm00001d051480,Zm00001d042463,Zm00001d013126,Zm00001d012413,Zm0000…
GO:0010218	response to far red light	biological_process	0.10684	1	1	783	4	26932	1	Zm00001d043325	0
GO:0005516	calmodulin binding	molecular_function	0.10757	1	4	783	65	26932	2	Zm00001d008570,Zm00001d023843	2	Zm00001d012929,Zm00001d046781
GO:0004818	glutamate-tRNA ligase activity	molecular_function	0.10764	1	1	783	4	26932	1	Zm00001d015037	0
GO:0006424	glutamyl-tRNA aminoacylation	biological_process	0.10764	1	1	783	4	26932	1	Zm00001d015037	0
GO:0046527	glucosyltransferase activity	molecular_function	0.10798	1	6	783	124	26932	1	Zm00001d012335	5	Zm00001d019479,Zm00001d046127,Zm00001d044566,Zm00001d045261,Zm00001d002256
GO:0048564	photosystem I assembly	biological_process	0.10823	1	1	783	4	26932	1	Zm00001d017751	0
GO:0004792	thiosulfate sulfurtransferase activity	molecular_function	0.10913	1	1	783	4	26932	0		1	Zm00001d051608
GO:0018198	peptidyl-cysteine modification	biological_process	0.10926	1	1	783	4	26932	0		1	Zm00001d051608
GO:0035246	peptidyl-arginine N-methylation	biological_process	0.1101	1	1	783	4	26932	0		1	Zm00001d004109
GO:0004809	tRNA (guanine-N2-)-methyltransferase activity	molecular_function	0.11032	1	1	783	4	26932	1	Zm00001d037860	0
GO:0070402	NADPH binding	molecular_function	0.1105	1	1	783	4	26932	1	Zm00001d008427	0
GO:0047484	regulation of response to osmotic stress	biological_process	0.11076	1	1	783	4	26932	0		1	Zm00001d026139
GO:0009063	cellular amino acid catabolic process	biological_process	0.11083	1	3	783	40	26932	1	Zm00001d051166	2	Zm00001d051194,Zm00001d023437
GO:0071446	cellular response to salicylic acid stimulus	biological_process	0.11089	1	1	783	4	26932	1	Zm00001d028165	0
GO:0009699	phenylpropanoid biosynthetic process	biological_process	0.11221	1	2	783	20	26932	1	Zm00001d051166	1	Zm00001d049541
GO:0009687	abscisic acid metabolic process	biological_process	0.11247	1	1	783	4	26932	0		1	Zm00001d025545
GO:0009688	abscisic acid biosynthetic process	biological_process	0.11247	1	1	783	4	26932	0		1	Zm00001d025545
GO:0043288	apocarotenoid metabolic process	biological_process	0.11247	1	1	783	4	26932	0		1	Zm00001d025545
GO:0043289	apocarotenoid biosynthetic process	biological_process	0.11247	1	1	783	4	26932	0		1	Zm00001d025545
GO:1902644	tertiary alcohol metabolic process	biological_process	0.11247	1	1	783	4	26932	0		1	Zm00001d025545
GO:1902645	tertiary alcohol biosynthetic process	biological_process	0.11247	1	1	783	4	26932	0		1	Zm00001d025545
GO:0008686	3,4-dihydroxy-2-butanone-4-phosphate synthase activity	molecular_function	0.11252	1	1	783	4	26932	1	Zm00001d016963	0
GO:0010340	carboxyl-O-methyltransferase activity	molecular_function	0.11297	1	1	783	4	26932	0		1	Zm00001d049966
GO:0051998	protein carboxyl O-methyltransferase activity	molecular_function	0.11297	1	1	783	4	26932	0		1	Zm00001d049966
GO:0050832	defense response to fungus	biological_process	0.11301	1	3	783	42	26932	2	Zm00001d048949,Zm00001d048950	1	Zm00001d026139
GO:0019747	regulation of isoprenoid metabolic process	biological_process	0.11323	1	1	783	4	26932	1	Zm00001d016714	0
GO:0046890	regulation of lipid biosynthetic process	biological_process	0.11323	1	1	783	4	26932	1	Zm00001d016714	0
GO:0015849	organic acid transport	biological_process	0.11401	1	4	783	63	26932	0		4	Zm00001d013652,Zm00001d008974,Zm00001d033493,Zm00001d019225
GO:0046942	carboxylic acid transport	biological_process	0.11401	1	4	783	63	26932	0		4	Zm00001d033493,Zm00001d019225,Zm00001d008974,Zm00001d013652
GO:0016459	myosin complex	cellular_component	0.1142	1	2	783	24	26932	0		2	Zm00001d013276,Zm00001d003690
GO:0048448	stamen morphogenesis	biological_process	0.11432	1	1	783	4	26932	0		1	Zm00001d053895
GO:0008285	negative regulation of cell proliferation	biological_process	0.11434	1	1	783	4	26932	1	Novel01047	0
GO:0006091	generation of precursor metabolites and energy	biological_process	0.11444	1	13	783	304	26932	4	Zm00001d024138,Zm00001d010375,Zm00001d017751,Novel00001	9	Zm00001d014772,Novel00789,Zm00001d003817,Novel00848,Zm00001d025690,Zm00001d038291,Zm00001d040084,Zm00001d016864,Zm00001d036206
GO:0009308	amine metabolic process	biological_process	0.11446	1	6	783	112	26932	2	Zm00001d032046,Novel01296	4	Zm00001d013655,Zm00001d051194,Zm00001d022557,Zm00001d034461
GO:0006810	transport	biological_process	0.11505	1	78	783	2387	26932	23	Zm00001d041308,Zm00001d013114,Zm00001d013529,Zm00001d003913,Zm00001d017713,Zm00001d044686,Zm00001d006126,Zm00001d042044,Zm00001d018332,Zm00001d021461,Zm00001d050462,Zm00001d021647,Zm00001d016280,Zm00001d042692,Zm00001d016577,Zm00001d026156,Zm00001d051174,Zm00001d026164,Zm00001d011315,Zm00001d026244,Zm00001d008345,Zm00001d009705,Zm00001d000196	55	Zm00001d016619,Zm00001d012953,Zm00001d048583,Zm00001d042684,Zm00001d025660,Zm00001d020488,Zm00001d013652,Zm00001d028311,Zm00001d033446,Zm00001d011328,Zm00001d034309,Zm00001d045572,Zm00001d043374,Zm00001d034208,Zm00001d042225,Zm00001d038911,Zm00001d033493,Zm00001d042345,Zm00001d008974,Zm00001d016060,Zm00001d033067,Zm00001d016396,Zm00001d051055,Zm00001d017249,Zm00001d019225,Zm00001d037492,Zm00001d0…
GO:0004617	phosphoglycerate dehydrogenase activity	molecular_function	0.1151	1	1	783	4	26932	1	Zm00001d046923	0
GO:0004449	isocitrate dehydrogenase (NAD+) activity	molecular_function	0.11511	1	1	783	4	26932	0		1	Zm00001d025690
GO:0010468	regulation of gene expression	biological_process	0.11616	1	71	783	2103	26932	36	Zm00001d027530,Zm00001d019734,Zm00001d041886,Zm00001d016457,Zm00001d048991,Zm00001d039531,Zm00001d043325,Zm00001d009619,Zm00001d026447,Zm00001d043094,Zm00001d020711,Zm00001d026305,Zm00001d037607,Zm00001d013151,Novel01559,Zm00001d038023,Zm00001d050247,Zm00001d034920,Zm00001d015226,Zm00001d026300,Zm00001d036364,Zm00001d024768,Zm00001d043025,Zm00001d049743,Zm00001d022437,Zm00001d019475,Zm00001d05256…	35	Zm00001d044857,Zm00001d046751,Zm00001d046947,Zm00001d039032,Zm00001d041453,Zm00001d028603,Zm00001d010634,Novel01082,Novel00326,Zm00001d016277,Zm00001d045320,Zm00001d012413,Zm00001d027431,Zm00001d008190,Zm00001d013126,Zm00001d042463,Zm00001d051480,Zm00001d026182,Zm00001d032144,Zm00001d034160,Zm00001d012128,Zm00001d016298,Zm00001d022526,Zm00001d026096,Zm00001d027925,Zm00001d039077,Novel01406,Zm0000…
GO:0007088	regulation of mitotic nuclear division	biological_process	0.11647	1	2	783	20	26932	0		2	Zm00001d050944,Novel01090
GO:0007091	metaphase/anaphase transition of mitotic cell cycle	biological_process	0.11647	1	2	783	20	26932	0		2	Novel01090,Zm00001d050944
GO:0010965	regulation of mitotic sister chromatid separation	biological_process	0.11647	1	2	783	20	26932	0		2	Novel01090,Zm00001d050944
GO:0030071	regulation of mitotic metaphase/anaphase transition	biological_process	0.11647	1	2	783	20	26932	0		2	Zm00001d050944,Novel01090
GO:0031145	anaphase-promoting complex-dependent proteasomal ubiquitin-dependent protein catabolic process	biological_process	0.11647	1	2	783	20	26932	0		2	Zm00001d050944,Novel01090
GO:0033045	regulation of sister chromatid segregation	biological_process	0.11647	1	2	783	20	26932	0		2	Novel01090,Zm00001d050944
GO:0033047	regulation of mitotic sister chromatid segregation	biological_process	0.11647	1	2	783	20	26932	0		2	Zm00001d050944,Novel01090
GO:0044784	metaphase/anaphase transition of cell cycle	biological_process	0.11647	1	2	783	20	26932	0		2	Novel01090,Zm00001d050944
GO:0051306	mitotic sister chromatid separation	biological_process	0.11647	1	2	783	20	26932	0		2	Novel01090,Zm00001d050944
GO:0051983	regulation of chromosome segregation	biological_process	0.11647	1	2	783	20	26932	0		2	Novel01090,Zm00001d050944
GO:1902099	regulation of metaphase/anaphase transition of cell cycle	biological_process	0.11647	1	2	783	20	26932	0		2	Zm00001d050944,Novel01090
GO:0005749	mitochondrial respiratory chain complex II, succinate dehydrogenase complex (ubiquinone)	cellular_component	0.11704	1	1	783	4	26932	0		1	Zm00001d005695
GO:0045257	succinate dehydrogenase complex (ubiquinone)	cellular_component	0.11704	1	1	783	4	26932	0		1	Zm00001d005695
GO:0045281	succinate dehydrogenase complex	cellular_component	0.11704	1	1	783	4	26932	0		1	Zm00001d005695
GO:0045283	fumarate reductase complex	cellular_component	0.11704	1	1	783	4	26932	0		1	Zm00001d005695
GO:0051016	barbed-end actin filament capping	biological_process	0.11724	1	1	783	4	26932	0		1	Novel01812
GO:0004127	cytidylate kinase activity	molecular_function	0.11737	1	1	783	4	26932	0		1	Zm00001d035916
GO:0009657	plastid organization	biological_process	0.11743	1	4	783	66	26932	4	Zm00001d043325,Zm00001d049743,Zm00001d017130,Zm00001d033181	0
GO:0033646	host intracellular part	cellular_component	0.11744	1	1	783	4	26932	0		1	Novel01406
GO:0033647	host intracellular organelle	cellular_component	0.11744	1	1	783	4	26932	0		1	Novel01406
GO:0033648	host intracellular membrane-bounded organelle	cellular_component	0.11744	1	1	783	4	26932	0		1	Novel01406
GO:0042025	host cell nucleus	cellular_component	0.11744	1	1	783	4	26932	0		1	Novel01406
GO:0043656	intracellular region of host	cellular_component	0.11744	1	1	783	4	26932	0		1	Novel01406
GO:0030975	thiamine binding	molecular_function	0.11764	1	1	783	4	26932	1	Novel00672	0
GO:0009512	cytochrome b6f complex	cellular_component	0.11765	1	1	783	4	26932	0		1	Novel00894
GO:0005179	hormone activity	molecular_function	0.11765	1	1	783	4	26932	0		1	Novel01103
GO:0047746	chlorophyllase activity	molecular_function	0.11767	1	1	783	4	26932	0		1	Zm00001d031934
GO:0009072	aromatic amino acid family metabolic process	biological_process	0.11838	1	5	783	87	26932	4	Zm00001d051166,Zm00001d025333,Zm00001d048561,Zm00001d016006	1	Zm00001d034461
GO:0042435	indole-containing compound biosynthetic process	biological_process	0.12029	1	2	783	20	26932	0		2	Zm00001d034461,Zm00001d049541
GO:0016846	carbon-sulfur lyase activity	molecular_function	0.12165	1	2	783	20	26932	2	Zm00001d008700,Zm00001d015976	0
GO:0006011	UDP-glucose metabolic process	biological_process	0.12196	1	1	783	5	26932	0		1	Zm00001d015008
GO:0044271	cellular nitrogen compound biosynthetic process	biological_process	0.12246	1	115	783	3517	26932	57	Zm00001d015204,Zm00001d019734,Zm00001d003411,Zm00001d011596,Novel00672,Zm00001d027530,Zm00001d048991,Zm00001d016457,Zm00001d015037,Zm00001d007092,Zm00001d033181,Zm00001d026531,Zm00001d041886,Zm00001d018096,Zm00001d043094,Zm00001d026447,Zm00001d034724,Zm00001d009619,Zm00001d036129,Zm00001d043325,Zm00001d039531,Zm00001d026685,Zm00001d027271,Novel01559,Zm00001d013151,Zm00001d027919,Zm00001d038023,Zm…	58	Zm00001d051194,Zm00001d035916,Novel00972,Zm00001d039032,Zm00001d014568,Zm00001d044857,Zm00001d046751,Zm00001d046947,Zm00001d041389,Zm00001d028603,Zm00001d041453,Zm00001d010634,Novel01082,Zm00001d042463,Zm00001d031241,Zm00001d051480,Zm00001d045320,Zm00001d016277,Novel01548,Zm00001d015917,Novel00326,Zm00001d013126,Zm00001d008190,Zm00001d027431,Zm00001d012413,Zm00001d022526,Zm00001d014873,Zm00001d02…
GO:0043207	response to external biotic stimulus	biological_process	0.1237	1	6	783	122	26932	4	Zm00001d011069,Zm00001d028165,Zm00001d048949,Zm00001d048950	2	Zm00001d026139,Zm00001d019225
GO:0051707	response to other organism	biological_process	0.1237	1	6	783	122	26932	4	Zm00001d048950,Zm00001d011069,Zm00001d048949,Zm00001d028165	2	Zm00001d019225,Zm00001d026139
GO:0006289	nucleotide-excision repair	biological_process	0.12445	1	2	783	22	26932	0		2	Zm00001d016801,Novel01082
GO:0044281	small molecule metabolic process	biological_process	0.12471	1	47	783	1358	26932	20	Zm00001d013644,Zm00001d024138,Zm00001d010375,Zm00001d026531,Zm00001d046923,Zm00001d025333,Zm00001d015037,Zm00001d026685,Zm00001d048561,Zm00001d014945,Zm00001d051851,Zm00001d005430,Zm00001d051166,Zm00001d008623,Zm00001d031449,Zm00001d016963,Zm00001d016006,Zm00001d028165,Zm00001d016438,Zm00001d021962	27	Zm00001d033907,Zm00001d003522,Zm00001d025545,Zm00001d035916,Zm00001d008974,Zm00001d047981,Novel00848,Zm00001d051194,Zm00001d014292,Zm00001d025170,Zm00001d040084,Zm00001d036206,Zm00001d052034,Zm00001d025690,Zm00001d022557,Zm00001d015008,Zm00001d012707,Zm00001d013655,Zm00001d023437,Zm00001d031685,Zm00001d014772,Novel00789,Zm00001d034461,Zm00001d051634,Zm00001d010321,Zm00001d031241,Zm00001d052769
GO:0006913	nucleocytoplasmic transport	biological_process	0.12538	1	3	783	45	26932	1	Zm00001d008345	2	Zm00001d011328,Zm00001d034309
GO:0016627	oxidoreductase activity, acting on the CH-CH group of donors	molecular_function	0.12602	1	4	783	66	26932	2	Zm00001d008203,Zm00001d002358	2	Zm00001d026277,Zm00001d001820
GO:0019748	secondary metabolic process	biological_process	0.12626	1	3	783	43	26932	1	Zm00001d051166	2	Zm00001d049541,Novel01087
GO:0045292	mRNA cis splicing, via spliceosome	biological_process	0.12653	1	1	783	5	26932	1	Zm00001d017751	0
GO:0009813	flavonoid biosynthetic process	biological_process	0.12679	1	2	783	23	26932	0		2	Zm00001d012972,Zm00001d049541
GO:0019252	starch biosynthetic process	biological_process	0.1269	1	2	783	22	26932	0		2	Zm00001d019479,Zm00001d045261
GO:0003727	single-stranded RNA binding	molecular_function	0.12697	1	1	783	5	26932	1	Zm00001d049743	0
GO:0006520	cellular amino acid metabolic process	biological_process	0.12753	1	18	783	463	26932	10	Zm00001d048561,Zm00001d013644,Zm00001d051166,Zm00001d028165,Zm00001d046923,Zm00001d016006,Zm00001d026531,Zm00001d021962,Zm00001d015037,Zm00001d025333	8	Zm00001d003522,Zm00001d023437,Zm00001d031685,Zm00001d047981,Zm00001d008974,Zm00001d051194,Zm00001d034461,Zm00001d031241
GO:0015629	actin cytoskeleton	cellular_component	0.12903	1	4	783	69	26932	0		4	Zm00001d013276,Zm00001d035629,Novel01812,Zm00001d003690
GO:0005938	cell cortex	cellular_component	0.12917	1	4	783	69	26932	1	Zm00001d050462	3	Novel01812,Zm00001d052245,Zm00001d034208
GO:0044448	cell cortex part	cellular_component	0.12917	1	4	783	69	26932	1	Zm00001d050462	3	Zm00001d052245,Novel01812,Zm00001d034208
GO:0016783	sulfurtransferase activity	molecular_function	0.12951	1	2	783	21	26932	0		2	Zm00001d051608,Zm00001d016850
GO:0090329	regulation of DNA-dependent DNA replication	biological_process	0.1305	1	1	783	5	26932	1	Zm00001d014885	0
GO:0051234	establishment of localization	biological_process	0.13133	1	78	783	2408	26932	23	Zm00001d042044,Zm00001d006126,Zm00001d016577,Zm00001d042692,Zm00001d016280,Zm00001d050462,Zm00001d021647,Zm00001d021461,Zm00001d018332,Zm00001d051174,Zm00001d026156,Zm00001d000196,Zm00001d009705,Zm00001d008345,Zm00001d026164,Zm00001d011315,Zm00001d026244,Zm00001d041308,Zm00001d013114,Zm00001d003913,Zm00001d013529,Zm00001d044686,Zm00001d017713	55	Zm00001d037492,Zm00001d019225,Zm00001d017249,Zm00001d051055,Zm00001d016396,Zm00001d016299,Zm00001d000195,Zm00001d043234,Zm00001d013445,Zm00001d000204,Zm00001d045567,Zm00001d041067,Zm00001d023673,Zm00001d023840,Zm00001d052245,Zm00001d039713,Zm00001d021629,Zm00001d053446,Zm00001d049441,Zm00001d025894,Zm00001d016183,Zm00001d021938,Zm00001d040627,Zm00001d006697,Zm00001d028164,Zm00001d012897,Zm00001d0…
GO:0003725	double-stranded RNA binding	molecular_function	0.13143	1	1	783	5	26932	1	Zm00001d049821	0
GO:0051169	nuclear transport	biological_process	0.13227	1	3	783	46	26932	1	Zm00001d008345	2	Zm00001d011328,Zm00001d034309
GO:0042644	chloroplast nucleoid	cellular_component	0.13282	1	1	783	5	26932	1	Zm00001d033181	0
GO:0003935	GTP cyclohydrolase II activity	molecular_function	0.13291	1	1	783	5	26932	1	Zm00001d016963	0
GO:0060255	regulation of macromolecule metabolic process	biological_process	0.13292	1	77	783	2313	26932	39	Zm00001d043025,Zm00001d024768,Zm00001d036364,Zm00001d037969,Zm00001d026300,Zm00001d034920,Zm00001d015226,Zm00001d050247,Novel01047,Zm00001d029940,Zm00001d047523,Zm00001d009939,Zm00001d017462,Zm00001d049743,Zm00001d014628,Zm00001d043663,Zm00001d017130,Novel01202,Zm00001d026360,Zm00001d052564,Zm00001d019475,Zm00001d022437,Zm00001d014885,Zm00001d041886,Zm00001d048991,Zm00001d016457,Zm00001d027530,Zm…	38	Zm00001d001838,Zm00001d017477,Novel01406,Zm00001d039077,Zm00001d027925,Zm00001d006835,Zm00001d028984,Zm00001d016298,Zm00001d012128,Zm00001d034160,Zm00001d032144,Zm00001d026182,Zm00001d026096,Zm00001d022526,Zm00001d042867,Zm00001d008817,Novel01090,Novel01032,Zm00001d021268,Zm00001d039506,Zm00001d050944,Zm00001d046947,Zm00001d046751,Zm00001d044857,Zm00001d039032,Zm00001d013126,Zm00001d008190,Zm0000…
GO:0044711	single-organism biosynthetic process	biological_process	0.13301	1	40	783	1159	26932	22	Zm00001d016438,Zm00001d016963,Zm00001d028165,Zm00001d016006,Zm00001d031449,Zm00001d008623,Zm00001d006678,Zm00001d005430,Zm00001d051166,Zm00001d043325,Zm00001d026685,Novel01160,Zm00001d048561,Zm00001d027271,Zm00001d025333,Zm00001d033181,Zm00001d026531,Zm00001d046923,Zm00001d008370,Zm00001d016714,Zm00001d013644,Zm00001d008427	18	Zm00001d049541,Zm00001d045261,Zm00001d034461,Zm00001d013013,Zm00001d003817,Zm00001d019479,Zm00001d012707,Zm00001d013655,Zm00001d022557,Zm00001d014568,Zm00001d014292,Zm00001d025170,Zm00001d008974,Zm00001d025545,Zm00001d035916,Zm00001d044566,Zm00001d013035,Zm00001d046127
GO:0000287	magnesium ion binding	molecular_function	0.13354	1	7	783	149	26932	4	Zm00001d024208,Zm00001d029648,Zm00001d041082,Zm00001d024211	3	Zm00001d000279,GRMZM5G815453,Zm00001d033907
GO:0016597	amino acid binding	molecular_function	0.1336	1	4	783	67	26932	3	Zm00001d025333,Zm00001d015032,Zm00001d046923	1	Zm00001d026677
GO:0009812	flavonoid metabolic process	biological_process	0.13464	1	2	783	24	26932	0		2	Zm00001d012972,Zm00001d049541
GO:0034227	tRNA thio-modification	biological_process	0.13559	1	1	783	5	26932	0		1	Zm00001d051608
GO:0006527	arginine catabolic process	biological_process	0.13642	1	1	783	5	26932	0		1	Zm00001d051194
GO:0018195	peptidyl-arginine modification	biological_process	0.13666	1	1	783	5	26932	0		1	Zm00001d004109
GO:0018216	peptidyl-arginine methylation	biological_process	0.13666	1	1	783	5	26932	0		1	Zm00001d004109
GO:2000030	regulation of response to red or far red light	biological_process	0.13669	1	1	783	5	26932	1	Zm00001d043325	0
GO:0009620	response to fungus	biological_process	0.13673	1	3	783	46	26932	2	Zm00001d048949,Zm00001d048950	1	Zm00001d026139
GO:0032586	protein storage vacuole membrane	cellular_component	0.13758	1	1	783	5	26932	0		1	Zm00001d051362
GO:0080019	fatty-acyl-CoA reductase (alcohol-forming) activity	molecular_function	0.13792	1	1	783	5	26932	0		1	Zm00001d019850
GO:0016810	hydrolase activity, acting on carbon-nitrogen (but not peptide) bonds	molecular_function	0.138	1	5	783	95	26932	4	Zm00001d016963,Zm00001d026531,Zm00001d015870,Zm00001d027876	1	Zm00001d051214
GO:0000049	tRNA binding	molecular_function	0.13809	1	2	783	24	26932	2	Zm00001d015037,Zm00001d037860	0
GO:0008422	beta-glucosidase activity	molecular_function	0.13861	1	1	783	5	26932	0		1	Zm00001d012159
GO:0051693	actin filament capping	biological_process	0.13996	1	1	783	5	26932	0		1	Novel01812
GO:0016814	hydrolase activity, acting on carbon-nitrogen (but not peptide) bonds, in cyclic amidines	molecular_function	0.14008	1	2	783	23	26932	2	Zm00001d026531,Zm00001d016963	0
GO:0048658	anther wall tapetum development	biological_process	0.14159	1	1	783	5	26932	0		1	Zm00001d053895
GO:0004813	alanine-tRNA ligase activity	molecular_function	0.14187	1	1	783	6	26932	0		1	Zm00001d031241
GO:0006419	alanyl-tRNA aminoacylation	biological_process	0.14187	1	1	783	6	26932	0		1	Zm00001d031241
GO:0046037	GMP metabolic process	biological_process	0.14251	1	1	783	5	26932	1	Zm00001d026685	0
GO:0030042	actin filament depolymerization	biological_process	0.14286	1	2	783	22	26932	0		2	Novel01812,Zm00001d035629
GO:0051261	protein depolymerization	biological_process	0.14286	1	2	783	22	26932	0		2	Zm00001d035629,Novel01812
GO:0006915	apoptotic process	biological_process	0.1442	1	1	783	5	26932	1	Novel01047	0
GO:0045273	respiratory chain complex II	cellular_component	0.14425	1	1	783	5	26932	0		1	Zm00001d005695
GO:0080036	regulation of cytokinin-activated signaling pathway	biological_process	0.14466	1	1	783	5	26932	1	Zm00001d012335	0
GO:0009306	protein secretion	biological_process	0.14466	1	1	783	5	26932	1	Zm00001d003913	0
GO:0004462	lactoylglutathione lyase activity	molecular_function	0.1447	1	1	783	5	26932	1	Zm00001d015976	0
GO:0033897	ribonuclease T2 activity	molecular_function	0.14474	1	1	783	5	26932	0		1	Zm00001d022630
GO:0044772	mitotic cell cycle phase transition	biological_process	0.146	1	2	783	23	26932	0		2	Zm00001d050944,Novel01090
GO:1901990	regulation of mitotic cell cycle phase transition	biological_process	0.146	1	2	783	23	26932	0		2	Novel01090,Zm00001d050944
GO:0051179	localization	biological_process	0.14757	1	78	783	2427	26932	23	Zm00001d009705,Zm00001d000196,Zm00001d011315,Zm00001d026164,Zm00001d026244,Zm00001d008345,Zm00001d026156,Zm00001d051174,Zm00001d016280,Zm00001d016577,Zm00001d042692,Zm00001d021461,Zm00001d018332,Zm00001d050462,Zm00001d021647,Zm00001d042044,Zm00001d006126,Zm00001d044686,Zm00001d017713,Zm00001d003913,Zm00001d013529,Zm00001d013114,Zm00001d041308	55	Zm00001d052261,Novel01074,Zm00001d051362,Zm00001d002458,Zm00001d016691,Zm00001d016794,Zm00001d010440,Zm00001d016183,Zm00001d021938,Zm00001d039713,Zm00001d049441,Zm00001d053446,Zm00001d021629,Zm00001d025894,Zm00001d028164,Zm00001d012897,Zm00001d024842,Zm00001d040627,Zm00001d006697,Zm00001d016299,Zm00001d000204,Zm00001d013445,Zm00001d045567,Zm00001d041067,Zm00001d023673,Zm00001d052245,Zm00001d02384…
GO:0003954	NADH dehydrogenase activity	molecular_function	0.14859	1	2	783	23	26932	0		2	Novel00848,Zm00001d043619
GO:0008137	NADH dehydrogenase (ubiquinone) activity	molecular_function	0.14859	1	2	783	23	26932	0		2	Zm00001d043619,Novel00848
GO:0050136	NADH dehydrogenase (quinone) activity	molecular_function	0.14859	1	2	783	23	26932	0		2	Novel00848,Zm00001d043619
GO:0006334	nucleosome assembly	biological_process	0.15139	1	3	783	45	26932	3	Zm00001d038851,Zm00001d021422,Zm00001d034479	0
GO:0031497	chromatin assembly	biological_process	0.15139	1	3	783	45	26932	3	Zm00001d038851,Zm00001d021422,Zm00001d034479	0
GO:0007268	synaptic transmission	biological_process	0.15522	1	1	783	6	26932	1	Novel00672	0
GO:0047769	arogenate dehydratase activity	molecular_function	0.1562	1	1	783	6	26932	1	Zm00001d025333	0
GO:0010639	negative regulation of organelle organization	biological_process	0.15621	1	2	783	25	26932	0		2	Zm00001d050944,Novel01812
GO:0051129	negative regulation of cellular component organization	biological_process	0.15621	1	2	783	25	26932	0		2	Zm00001d050944,Novel01812
GO:0010114	response to red light	biological_process	0.15623	1	1	783	6	26932	1	Zm00001d043325	0
GO:0004564	beta-fructofuranosidase activity	molecular_function	0.15647	1	1	783	6	26932	1	Zm00001d025943	0
GO:0004575	sucrose alpha-glucosidase activity	molecular_function	0.15647	1	1	783	6	26932	1	Zm00001d025943	0
GO:0090599	alpha-glucosidase activity	molecular_function	0.15647	1	1	783	6	26932	1	Zm00001d025943	0
GO:0044699	single-organism process	biological_process	0.15688	1	232	783	7676	26932	99	Zm00001d001960,Zm00001d000196,Zm00001d002937,Zm00001d015747,Zm00001d008345,Zm00001d008427,Zm00001d016714,Zm00001d012335,Zm00001d008370,Zm00001d054044,Novel01309,Zm00001d037005,Zm00001d044156,Zm00001d016577,Zm00001d048561,Zm00001d042692,Zm00001d046342,Zm00001d048819,Zm00001d014958,Zm00001d026360,Zm00001d032046,Zm00001d004978,Zm00001d003524,Zm00001d006069,Zm00001d024843,Zm00001d016963,Zm00001d02528…	133	Zm00001d013035,Zm00001d012128,Zm00001d046127,Zm00001d044566,Zm00001d050775,Zm00001d003522,Zm00001d032144,Zm00001d023873,Zm00001d011477,Zm00001d010440,Zm00001d016691,Zm00001d014292,Zm00001d053446,Zm00001d025894,GRMZM5G815453,Zm00001d044120,Zm00001d001820,Zm00001d040084,Zm00001d021938,Zm00001d040627,Zm00001d006697,Zm00001d025533,Zm00001d052034,Zm00001d028164,Zm00001d022557,Zm00001d015008,Zm00001d01…
GO:1990204	oxidoreductase complex	cellular_component	0.15697	1	4	783	69	26932	1	Novel00087	3	Zm00001d005695,Zm00001d016864,Zm00001d014772
GO:0098542	defense response to other organism	biological_process	0.15737	1	5	783	102	26932	4	Zm00001d048950,Zm00001d011069,Zm00001d028165,Zm00001d048949	1	Zm00001d026139
GO:0048468	cell development	biological_process	0.15793	1	2	783	25	26932	1	Zm00001d053926	1	Novel01469
GO:0032434	regulation of proteasomal ubiquitin-dependent protein catabolic process	biological_process	0.15805	1	2	783	24	26932	0		2	Zm00001d050944,Novel01090
GO:0061136	regulation of proteasomal protein catabolic process	biological_process	0.15805	1	2	783	24	26932	0		2	Zm00001d050944,Novel01090
GO:1903050	regulation of proteolysis involved in cellular protein catabolic process	biological_process	0.15805	1	2	783	24	26932	0		2	Zm00001d050944,Novel01090
GO:1903362	regulation of cellular protein catabolic process	biological_process	0.15805	1	2	783	24	26932	0		2	Novel01090,Zm00001d050944
GO:0010090	trichome morphogenesis	biological_process	0.15849	1	1	783	6	26932	1	Zm00001d053926	0
GO:0090626	plant epidermis morphogenesis	biological_process	0.15849	1	1	783	6	26932	1	Zm00001d053926	0
GO:0006970	response to osmotic stress	biological_process	0.15849	1	4	783	75	26932	1	Zm00001d017130	3	Zm00001d008974,Zm00001d026139,Zm00001d012929
GO:0044550	secondary metabolite biosynthetic process	biological_process	0.15852	1	2	783	25	26932	1	Zm00001d051166	1	Zm00001d049541
GO:0034728	nucleosome organization	biological_process	0.15878	1	3	783	46	26932	3	Zm00001d021422,Zm00001d034479,Zm00001d038851	0
GO:0051304	chromosome separation	biological_process	0.15981	1	2	783	25	26932	0		2	Novel01090,Zm00001d050944
GO:0044452	nucleolar part	cellular_component	0.16196	1	1	783	6	26932	1	Zm00001d052952	0
GO:0046654	tetrahydrofolate biosynthetic process	biological_process	0.16263	1	1	783	6	26932	1	Zm00001d026531	0
GO:0030834	regulation of actin filament depolymerization	biological_process	0.1628	1	1	783	6	26932	0		1	Novel01812
GO:0030835	negative regulation of actin filament depolymerization	biological_process	0.1628	1	1	783	6	26932	0		1	Novel01812
GO:0043242	negative regulation of protein complex disassembly	biological_process	0.1628	1	1	783	6	26932	0		1	Novel01812
GO:1901879	regulation of protein depolymerization	biological_process	0.1628	1	1	783	6	26932	0		1	Novel01812
GO:1901880	negative regulation of protein depolymerization	biological_process	0.1628	1	1	783	6	26932	0		1	Novel01812
GO:0044765	single-organism transport	biological_process	0.16321	1	55	783	1683	26932	16	Zm00001d051174,Zm00001d003913,Zm00001d026156,Zm00001d008345,Zm00001d044686,Zm00001d026244,Zm00001d000196,Zm00001d009705,Zm00001d042044,Zm00001d041308,Zm00001d050462,Zm00001d021461,Zm00001d018332,Zm00001d016577,Zm00001d042692,Zm00001d016280	39	Zm00001d006697,Zm00001d040627,Zm00001d028164,Zm00001d024842,Zm00001d038911,Zm00001d053446,Zm00001d021629,Zm00001d025894,Zm00001d016183,Zm00001d042225,Zm00001d034208,Zm00001d021938,Zm00001d008974,Zm00001d016794,Zm00001d042345,Zm00001d010440,Zm00001d033493,Zm00001d016691,Zm00001d033067,Zm00001d017249,Zm00001d048583,Zm00001d016619,Zm00001d012953,Zm00001d051055,Zm00001d033446,Zm00001d037492,Zm00001d0…
GO:0044770	cell cycle phase transition	biological_process	0.16322	1	2	783	25	26932	0		2	Novel01090,Zm00001d050944
GO:1901987	regulation of cell cycle phase transition	biological_process	0.16322	1	2	783	25	26932	0		2	Zm00001d050944,Novel01090
GO:1901607	alpha-amino acid biosynthetic process	biological_process	0.16498	1	8	783	184	26932	6	Zm00001d013644,Zm00001d046923,Zm00001d028165,Zm00001d026531,Zm00001d025333,Zm00001d048561	2	Zm00001d008974,Zm00001d034461
GO:0004812	aminoacyl-tRNA ligase activity	molecular_function	0.16519	1	5	783	104	26932	3	Zm00001d026255,Zm00001d021962,Zm00001d015037	2	Zm00001d031241,Zm00001d031685
GO:0016875	ligase activity, forming carbon-oxygen bonds	molecular_function	0.16519	1	5	783	104	26932	3	Zm00001d026255,Zm00001d021962,Zm00001d015037	2	Zm00001d031685,Zm00001d031241
GO:0016876	ligase activity, forming aminoacyl-tRNA and related compounds	molecular_function	0.16519	1	5	783	104	26932	3	Zm00001d026255,Zm00001d015037,Zm00001d021962	2	Zm00001d031241,Zm00001d031685
GO:0004618	phosphoglycerate kinase activity	molecular_function	0.16523	1	1	783	6	26932	1	Zm00001d024138	0
GO:0009809	lignin biosynthetic process	biological_process	0.16547	1	1	783	6	26932	0		1	Zm00001d049541
GO:0006333	chromatin assembly or disassembly	biological_process	0.1663	1	3	783	47	26932	3	Zm00001d038851,Zm00001d034479,Zm00001d021422	0
GO:0016872	intramolecular lyase activity	molecular_function	0.16668	1	2	783	26	26932	0		2	Zm00001d014292,Zm00001d012972
GO:0009658	chloroplast organization	biological_process	0.16671	1	3	783	50	26932	3	Zm00001d033181,Zm00001d049743,Zm00001d017130	0
GO:0009409	response to cold	biological_process	0.16917	1	3	783	49	26932	0		3	Zm00001d046625,Zm00001d012929,Zm00001d015212
GO:0001775	cell activation	biological_process	0.16934	1	1	783	6	26932	0		1	Novel01469
GO:0005577	fibrinogen complex	cellular_component	0.16934	1	1	783	6	26932	0		1	Novel01469
GO:0007596	blood coagulation	biological_process	0.16934	1	1	783	6	26932	0		1	Novel01469
GO:0007599	hemostasis	biological_process	0.16934	1	1	783	6	26932	0		1	Novel01469
GO:0030168	platelet activation	biological_process	0.16934	1	1	783	6	26932	0		1	Novel01469
GO:0042060	wound healing	biological_process	0.16934	1	1	783	6	26932	0		1	Novel01469
GO:0050817	coagulation	biological_process	0.16934	1	1	783	6	26932	0		1	Novel01469
GO:0050878	regulation of body fluid levels	biological_process	0.16934	1	1	783	6	26932	0		1	Novel01469
GO:0022412	cellular process involved in reproduction in multicellular organism	biological_process	0.16944	1	1	783	6	26932	0		1	Novel01469
GO:0030855	epithelial cell differentiation	biological_process	0.16951	1	1	783	6	26932	0		1	Novel01469
GO:0060429	epithelium development	biological_process	0.16951	1	1	783	6	26932	0		1	Novel01469
GO:0003906	DNA-(apurinic or apyrimidinic site) lyase activity	molecular_function	0.16955	1	1	783	6	26932	0		1	Zm00001d016801
GO:0010285	L,L-diaminopimelate aminotransferase activity	molecular_function	0.17036	1	1	783	6	26932	1	Zm00001d028165	0
GO:0018995	host	cellular_component	0.17063	1	1	783	6	26932	0		1	Novel01406
GO:0033643	host cell part	cellular_component	0.17063	1	1	783	6	26932	0		1	Novel01406
GO:0043657	host cell	cellular_component	0.17063	1	1	783	6	26932	0		1	Novel01406
GO:0044215	other organism	cellular_component	0.17063	1	1	783	6	26932	0		1	Novel01406
GO:0044216	other organism cell	cellular_component	0.17063	1	1	783	6	26932	0		1	Novel01406
GO:0044217	other organism part	cellular_component	0.17063	1	1	783	6	26932	0		1	Novel01406
GO:0001671	ATPase activator activity	molecular_function	0.17102	1	1	783	6	26932	0		1	Novel01815
GO:0008610	lipid biosynthetic process	biological_process	0.1711	1	13	783	330	26932	9	Zm00001d005430,Zm00001d006678,Zm00001d016438,Zm00001d016714,Zm00001d008427,Zm00001d031449,Zm00001d008623,Zm00001d008370,Zm00001d027271	4	Zm00001d025545,Zm00001d013035,Zm00001d014292,Zm00001d025170
GO:0000028	ribosomal small subunit assembly	biological_process	0.17113	1	1	783	6	26932	1	Zm00001d027919	0
GO:0009229	thiamine diphosphate biosynthetic process	biological_process	0.17119	1	1	783	6	26932	1	Novel00672	0
GO:0042357	thiamine diphosphate metabolic process	biological_process	0.17119	1	1	783	6	26932	1	Novel00672	0
GO:0000981	RNA polymerase II transcription factor activity, sequence-specific DNA binding	molecular_function	0.17122	1	1	783	6	26932	1	Novel01047	0
GO:1990380	Lys48-specific deubiquitinase activity	molecular_function	0.17217	1	1	783	7	26932	0		1	Zm00001d031241
GO:0003918	DNA topoisomerase type II (ATP-hydrolyzing) activity	molecular_function	0.17262	1	1	783	7	26932	1	Zm00001d017720	0
GO:0061505	DNA topoisomerase II activity	molecular_function	0.17262	1	1	783	7	26932	1	Zm00001d017720	0
GO:0045786	negative regulation of cell cycle	biological_process	0.17475	1	2	783	26	26932	1	Novel01047	1	Zm00001d050944
GO:0000373	Group II intron splicing	biological_process	0.17704	1	1	783	8	26932	1	Zm00001d017751	0
GO:0032940	secretion by cell	biological_process	0.17901	1	4	783	78	26932	2	Zm00001d003913,Zm00001d050462	2	Zm00001d052245,Zm00001d034208
GO:0048449	floral organ formation	biological_process	0.18456	1	1	783	7	26932	0		1	Zm00001d053895
GO:0000439	core TFIIH complex	cellular_component	0.18509	1	1	783	7	26932	0		1	Novel01082
GO:0000229	cytoplasmic chromosome	cellular_component	0.1858	1	1	783	7	26932	1	Zm00001d043325	0
GO:0009508	plastid chromosome	cellular_component	0.1858	1	1	783	7	26932	1	Zm00001d043325	0
GO:0009635	response to herbicide	biological_process	0.18735	1	1	783	7	26932	1	Zm00001d024839	0
GO:0031461	cullin-RING ubiquitin ligase complex	cellular_component	0.18806	1	2	783	28	26932	0		2	Zm00001d050944,Novel01090
GO:0030837	negative regulation of actin filament polymerization	biological_process	0.19047	1	1	783	7	26932	0		1	Novel01812
GO:0031333	negative regulation of protein complex assembly	biological_process	0.19047	1	1	783	7	26932	0		1	Novel01812
GO:0032272	negative regulation of protein polymerization	biological_process	0.19047	1	1	783	7	26932	0		1	Novel01812
GO:0004030	aldehyde dehydrogenase [NAD(P)+] activity	molecular_function	0.19089	1	1	783	7	26932	1	Zm00001d017418	0
GO:0015980	energy derivation by oxidation of organic compounds	biological_process	0.19145	1	5	783	106	26932	0		5	Zm00001d014772,Novel00789,Zm00001d003817,Zm00001d025690,Novel00848
GO:1902578	single-organism localization	biological_process	0.19196	1	55	783	1708	26932	16	Zm00001d003913,Zm00001d051174,Zm00001d026156,Zm00001d000196,Zm00001d009705,Zm00001d008345,Zm00001d044686,Zm00001d026244,Zm00001d042044,Zm00001d041308,Zm00001d016577,Zm00001d042692,Zm00001d016280,Zm00001d050462,Zm00001d021461,Zm00001d018332	39	Zm00001d038911,Zm00001d021629,Zm00001d053446,Zm00001d025894,Zm00001d016183,Zm00001d034208,Zm00001d042225,Zm00001d021938,Zm00001d040627,Zm00001d006697,Zm00001d028164,Zm00001d024842,Zm00001d033067,Zm00001d008974,Zm00001d016794,Zm00001d042345,Zm00001d010440,Zm00001d033493,Zm00001d016691,Zm00001d033446,Zm00001d037492,Zm00001d028311,Zm00001d013652,Zm00001d019225,Zm00001d020488,Zm00001d017249,Zm00001d0…
GO:0015018	galactosylgalactosylxylosylprotein 3-beta-glucuronosyltransferase activity	molecular_function	0.192	1	2	783	28	26932	2	Zm00001d015256,Zm00001d035494	0
GO:0009041	uridylate kinase activity	molecular_function	0.19296	1	1	783	7	26932	0		1	Zm00001d035916
GO:0031967	organelle envelope	cellular_component	0.19388	1	12	783	309	26932	4	Novel00087,Zm00001d052410,Zm00001d016714,Zm00001d021245	8	Zm00001d015431,Zm00001d016864,Novel00092,Zm00001d016619,Zm00001d014772,Zm00001d048583,Zm00001d005695,Zm00001d014744
GO:0031975	envelope	cellular_component	0.19388	1	12	783	309	26932	4	Zm00001d021245,Zm00001d052410,Zm00001d016714,Novel00087	8	Zm00001d014744,Zm00001d005695,Zm00001d048583,Zm00001d014772,Zm00001d016619,Novel00092,Zm00001d016864,Zm00001d015431
GO:0006564	L-serine biosynthetic process	biological_process	0.19442	1	1	783	7	26932	1	Zm00001d046923	0
GO:0030674	protein binding, bridging	molecular_function	0.19494	1	1	783	7	26932	0		1	Novel01469
GO:0060090	binding, bridging	molecular_function	0.19494	1	1	783	7	26932	0		1	Novel01469
GO:1901360	organic cyclic compound metabolic process	biological_process	0.19566	1	134	783	4377	26932	63	Zm00001d021962,Zm00001d017462,Zm00001d009939,Zm00001d002358,Zm00001d017720,Novel01047,Novel01202,Novel01160,Zm00001d013489,Zm00001d039451,Zm00001d043025,Novel00029,Zm00001d024138,Zm00001d050247,Zm00001d008203,Zm00001d028083,Zm00001d016866,Zm00001d013151,Zm00001d016006,Zm00001d038023,Zm00001d020711,Zm00001d017751,Zm00001d036396,Zm00001d026685,Zm00001d033181,Zm00001d014885,Zm00001d019734,Novel00672…	71	Zm00001d049541,Novel01032,Zm00001d008817,Novel01090,Zm00001d026392,Zm00001d013013,Novel00789,Zm00001d031934,Zm00001d039506,Zm00001d013655,Zm00001d012707,Zm00001d044321,Zm00001d028984,Zm00001d026277,Zm00001d027925,Zm00001d015212,Zm00001d001838,Zm00001d022526,Zm00001d026421,Zm00001d026096,Zm00001d026182,Zm00001d034160,Zm00001d016298,Zm00001d042463,Zm00001d051480,Zm00001d031241,Novel01548,Zm00001d01…
GO:0004602	glutathione peroxidase activity	molecular_function	0.19654	1	1	783	7	26932	0		1	Zm00001d026154
GO:0016892	endoribonuclease activity, producing 3'-phosphomonoesters	molecular_function	0.19664	1	1	783	7	26932	0		1	Zm00001d022630
GO:0006952	defense response	biological_process	0.19666	1	9	783	221	26932	6	Zm00001d026200,Zm00001d048950,Zm00001d011069,Zm00001d023811,Zm00001d028165,Zm00001d048949	3	Zm00001d021843,Zm00001d046781,Zm00001d026139
GO:0071108	protein K48-linked deubiquitination	biological_process	0.19762	1	1	783	8	26932	0		1	Zm00001d031241
GO:0033044	regulation of chromosome organization	biological_process	0.20007	1	2	783	29	26932	0		2	Zm00001d050944,Novel01090
GO:0043624	cellular protein complex disassembly	biological_process	0.20059	1	3	783	51	26932	0		3	Zm00001d035629,Novel01812,Zm00001d037868
GO:0006972	hyperosmotic response	biological_process	0.20092	1	1	783	8	26932	0		1	Zm00001d008974
GO:0009735	response to cytokinin	biological_process	0.20127	1	2	783	28	26932	2	Zm00001d047581,Zm00001d012335	0
GO:0070417	cellular response to cold	biological_process	0.20162	1	1	783	8	26932	0		1	Zm00001d015212
GO:0043565	sequence-specific DNA binding	molecular_function	0.20359	1	20	783	549	26932	14	Zm00001d043663,Zm00001d050247,Zm00001d014628,Zm00001d022437,Zm00001d039531,Zm00001d009619,Zm00001d038023,Zm00001d024768,Zm00001d009939,Zm00001d043025,Zm00001d016457,Zm00001d037607,Zm00001d020711,Zm00001d047523	6	Zm00001d021268,Zm00001d039032,Novel01032,Zm00001d012413,Zm00001d008190,Zm00001d046751
GO:0051783	regulation of nuclear division	biological_process	0.2052	1	2	783	29	26932	0		2	Zm00001d050944,Novel01090
GO:0005982	starch metabolic process	biological_process	0.20546	1	2	783	30	26932	0		2	Zm00001d045261,Zm00001d019479
GO:0009065	glutamine family amino acid catabolic process	biological_process	0.20579	1	1	783	8	26932	0		1	Zm00001d051194
GO:0007267	cell-cell signaling	biological_process	0.20649	1	1	783	8	26932	1	Novel00672	0
GO:0019222	regulation of metabolic process	biological_process	0.20661	1	83	783	2591	26932	42	Zm00001d016714,Zm00001d037969,Zm00001d034920,Zm00001d050247,Zm00001d015226,Zm00001d026300,Zm00001d036364,Zm00001d043025,Zm00001d024768,Zm00001d049743,Zm00001d019475,Zm00001d026360,Zm00001d052564,Zm00001d022437,Zm00001d014628,Zm00001d017130,Novel01202,Zm00001d043663,Zm00001d047523,Novel01047,Zm00001d029940,Zm00001d017462,Zm00001d009939,Zm00001d027530,Zm00001d017187,Zm00001d019734,Zm00001d014885,Zm…	41	Zm00001d032144,Zm00001d026182,Zm00001d012128,Zm00001d016298,Zm00001d034160,Zm00001d022526,Zm00001d026096,Zm00001d039077,Zm00001d017477,Novel01406,Zm00001d027925,Zm00001d001838,Zm00001d028984,Zm00001d006835,Zm00001d021268,Zm00001d017755,Zm00001d050944,Zm00001d039506,Zm00001d042867,Novel01032,Novel01090,Zm00001d008817,Zm00001d046751,Zm00001d044857,Zm00001d046947,Zm00001d039032,Zm00001d028603,Zm0000…
GO:0019751	polyol metabolic process	biological_process	0.208	1	2	783	29	26932	0		2	Zm00001d033907,Zm00001d014292
GO:0022892	substrate-specific transporter activity	molecular_function	0.20821	1	24	783	712	26932	6	Zm00001d003913,Zm00001d051174,Zm00001d041308,Zm00001d018332,Zm00001d021461,Zm00001d008345	18	Zm00001d016619,Zm00001d051055,Zm00001d028164,Zm00001d040627,Zm00001d006697,Zm00001d017249,Zm00001d021938,Zm00001d019225,Zm00001d013652,Zm00001d053446,Zm00001d033446,Novel01064,Zm00001d013445,Zm00001d033493,Zm00001d000204,Zm00001d008974,Zm00001d034309,Zm00001d033067
GO:0048444	floral organ morphogenesis	biological_process	0.2085	1	1	783	8	26932	0		1	Zm00001d053895
GO:0048563	post-embryonic organ morphogenesis	biological_process	0.2085	1	1	783	8	26932	0		1	Zm00001d053895
GO:0004345	glucose-6-phosphate dehydrogenase activity	molecular_function	0.20853	1	1	783	8	26932	1	Zm00001d025288	0
GO:0004601	peroxidase activity	molecular_function	0.20897	1	9	783	216	26932	5	Zm00001d016802,Zm00001d054044,Zm00001d030685,Zm00001d040705,Zm00001d024752	4	Zm00001d026154,Zm00001d053839,Zm00001d009373,Zm00001d043543
GO:0071702	organic substance transport	biological_process	0.20912	1	25	783	733	26932	8	Zm00001d026244,Zm00001d013114,Zm00001d008345,Zm00001d044686,Zm00001d016280,Zm00001d006126,Zm00001d042044,Zm00001d003913	17	Zm00001d011328,Zm00001d041067,Zm00001d033493,Zm00001d013445,Zm00001d023840,Zm00001d023673,Zm00001d008974,Zm00001d010440,Zm00001d034309,Zm00001d016060,Zm00001d002458,Zm00001d012953,Zm00001d012897,Zm00001d019225,Zm00001d025660,Zm00001d038911,Zm00001d013652
GO:0008216	spermidine metabolic process	biological_process	0.21031	1	1	783	8	26932	0		1	Zm00001d051194
GO:0008295	spermidine biosynthetic process	biological_process	0.21031	1	1	783	8	26932	0		1	Zm00001d051194
GO:0016616	oxidoreductase activity, acting on the CH-OH group of donors, NAD or NADP as acceptor	molecular_function	0.21037	1	7	783	164	26932	6	Zm00001d027271,Zm00001d025288,Zm00001d046923,Zm00001d014945,Zm00001d008427,Zm00001d014919	1	Zm00001d025690
GO:0009736	cytokinin-activated signaling pathway	biological_process	0.21056	1	1	783	8	26932	1	Zm00001d012335	0
GO:0071368	cellular response to cytokinin stimulus	biological_process	0.21056	1	1	783	8	26932	1	Zm00001d012335	0
GO:0000070	mitotic sister chromatid segregation	biological_process	0.21143	1	2	783	31	26932	0		2	Novel01090,Zm00001d050944
GO:0000819	sister chromatid segregation	biological_process	0.21143	1	2	783	31	26932	0		2	Novel01090,Zm00001d050944
GO:0016070	RNA metabolic process	biological_process	0.21149	1	89	783	2811	26932	46	Zm00001d041886,Zm00001d033181,Zm00001d016457,Zm00001d015037,Zm00001d048991,Zm00001d027530,Zm00001d019734,Zm00001d037607,Zm00001d036396,Zm00001d020711,Zm00001d026305,Zm00001d017751,Zm00001d038023,Novel01559,Zm00001d013151,Zm00001d039531,Zm00001d009619,Zm00001d043325,Zm00001d026447,Zm00001d043094,Novel00029,Zm00001d024768,Zm00001d039451,Zm00001d043025,Zm00001d036364,Zm00001d013489,Zm00001d037860,Zm…	43	Zm00001d046947,Zm00001d044857,Zm00001d046751,Zm00001d039032,Zm00001d008190,Zm00001d027431,Zm00001d012413,Zm00001d013126,Novel00326,Zm00001d045320,Novel01548,Zm00001d016277,Zm00001d031241,Zm00001d051480,Zm00001d042463,Zm00001d010634,Novel01082,Zm00001d041453,Zm00001d015372,Zm00001d028603,Zm00001d001838,Zm00001d027925,Zm00001d017477,Novel01406,Zm00001d039077,Zm00001d006835,Zm00001d028984,Zm00001d03…
GO:0051494	negative regulation of cytoskeleton organization	biological_process	0.21197	1	1	783	8	26932	0		1	Novel01812
GO:0051053	negative regulation of DNA metabolic process	biological_process	0.21266	1	1	783	9	26932	1	Zm00001d014885	0
GO:0016054	organic acid catabolic process	biological_process	0.2135	1	3	783	55	26932	1	Zm00001d051166	2	Zm00001d051194,Zm00001d023437
GO:0046395	carboxylic acid catabolic process	biological_process	0.2135	1	3	783	55	26932	1	Zm00001d051166	2	Zm00001d023437,Zm00001d051194
GO:0006323	DNA packaging	biological_process	0.21497	1	3	783	55	26932	3	Zm00001d034479,Zm00001d021422,Zm00001d038851	0
GO:0016894	endonuclease activity, active with either ribo- or deoxyribonucleic acids and producing 3'-phosphomonoesters	molecular_function	0.2156	1	1	783	8	26932	0		1	Zm00001d022630
GO:0051726	regulation of cell cycle	biological_process	0.21562	1	4	783	82	26932	2	Novel01047,Zm00001d026360	2	Novel01090,Zm00001d050944
GO:0042221	response to chemical	biological_process	0.21624	1	20	783	572	26932	10	Zm00001d024839,Zm00001d012335,Zm00001d033463,Zm00001d028165,Zm00001d047581,Zm00001d042692,Zm00001d013619,Zm00001d000196,Zm00001d017130,Zm00001d033462	10	Zm00001d028311,Zm00001d021629,Zm00001d015212,Zm00001d016277,Zm00001d012929,Novel00972,Zm00001d052148,Zm00001d025947,Zm00001d042345,Zm00001d000195
GO:0022411	cellular component disassembly	biological_process	0.2166	1	3	783	53	26932	0		3	Zm00001d035629,Novel01812,Zm00001d037868
GO:0032984	macromolecular complex disassembly	biological_process	0.2166	1	3	783	53	26932	0		3	Novel01812,Zm00001d035629,Zm00001d037868
GO:0043241	protein complex disassembly	biological_process	0.2166	1	3	783	53	26932	0		3	Novel01812,Zm00001d035629,Zm00001d037868
GO:0009250	glucan biosynthetic process	biological_process	0.21698	1	5	783	121	26932	0		5	Zm00001d045261,Zm00001d003817,Zm00001d046127,Zm00001d044566,Zm00001d019479
GO:0006633	fatty acid biosynthetic process	biological_process	0.21788	1	5	783	109	26932	4	Zm00001d008623,Zm00001d016438,Zm00001d031449,Zm00001d005430	1	Zm00001d025170
GO:0042430	indole-containing compound metabolic process	biological_process	0.219	1	2	783	29	26932	0		2	Zm00001d034461,Zm00001d049541
GO:0010017	red or far-red light signaling pathway	biological_process	0.21934	1	1	783	10	26932	1	Zm00001d043325	0
GO:0071489	cellular response to red or far red light	biological_process	0.21934	1	1	783	10	26932	1	Zm00001d043325	0
GO:0004512	inositol-3-phosphate synthase activity	molecular_function	0.21938	1	1	783	8	26932	0		1	Zm00001d014292
GO:0009624	response to nematode	biological_process	0.22094	1	1	783	9	26932	0		1	Zm00001d019225
GO:0042542	response to hydrogen peroxide	biological_process	0.22107	1	1	783	8	26932	0		1	Zm00001d012929
GO:0044036	cell wall macromolecule metabolic process	biological_process	0.22126	1	4	783	79	26932	3	Zm00001d009936,Zm00001d014840,Zm00001d014842	1	Zm00001d024071
GO:0000774	adenyl-nucleotide exchange factor activity	molecular_function	0.22132	1	1	783	8	26932	1	Zm00001d017187	0
GO:1901566	organonitrogen compound biosynthetic process	biological_process	0.22299	1	52	783	1576	26932	28	Zm00001d002358,Zm00001d005030,Zm00001d021962,Zm00001d016866,Zm00001d006596,Zm00001d028165,Zm00001d016006,Zm00001d027919,Zm00001d016963,Zm00001d036129,Zm00001d027271,Zm00001d026685,Novel01160,Zm00001d048561,Zm00001d018096,Zm00001d034724,Zm00001d025333,Zm00001d015037,Zm00001d026531,Zm00001d046923,Zm00001d007092,Novel00672,Zm00001d028083,Zm00001d011596,Zm00001d008203,Zm00001d013644,Zm00001d015204,Zm…	24	Zm00001d015917,Zm00001d051608,Zm00001d045320,Zm00001d034461,Zm00001d049541,Zm00001d037868,Zm00001d031241,Novel00549,Zm00001d045876,Zm00001d013655,Zm00001d012707,Zm00001d016850,Zm00001d013013,Zm00001d031685,Zm00001d041389,Zm00001d044321,Novel00972,Zm00001d022557,Zm00001d026277,Zm00001d035916,Zm00001d024029,Zm00001d051194,Zm00001d008974,Zm00001d014873
GO:0005488	binding	molecular_function	0.22308	1	364	783	12267	26932	195	Zm00001d053926,Zm00001d029648,Zm00001d048087,Zm00001d021176,Zm00001d013231,Zm00001d044975,Zm00001d006596,Zm00001d041082,Zm00001d028165,Zm00001d042044,Novel00377,Zm00001d025255,Zm00001d007015,Zm00001d026300,Zm00001d018181,Zm00001d020811,Zm00001d030090,Zm00001d051323,Zm00001d020705,Zm00001d007644,Zm00001d013114,Zm00001d033152,Zm00001d008853,Zm00001d012322,Zm00001d013151,Zm00001d016866,Zm00001d01669…	169	Zm00001d017598,Zm00001d013013,Zm00001d039506,Zm00001d031503,Zm00001d017416,Zm00001d032480,Novel01032,Zm00001d049541,Zm00001d041298,Zm00001d051252,Zm00001d022526,Zm00001d026096,Zm00001d026421,Zm00001d043144,Zm00001d025545,Zm00001d027987,Zm00001d015221,Zm00001d020722,Zm00001d001838,Zm00001d038651,Zm00001d011328,Zm00001d021038,Zm00001d026097,Zm00001d003817,Zm00001d051800,Zm00001d048527,Zm00001d01661…
GO:0003777	microtubule motor activity	molecular_function	0.22313	1	4	783	95	26932	2	Zm00001d029390,Zm00001d002937	2	Zm00001d045759,Zm00001d023840
GO:0007018	microtubule-based movement	biological_process	0.22313	1	4	783	95	26932	2	Zm00001d002937,Zm00001d029390	2	Zm00001d023840,Zm00001d045759
GO:0046903	secretion	biological_process	0.22351	1	4	783	85	26932	2	Zm00001d050462,Zm00001d003913	2	Zm00001d034208,Zm00001d052245
GO:0016684	oxidoreductase activity, acting on peroxide as acceptor	molecular_function	0.22412	1	9	783	220	26932	5	Zm00001d024752,Zm00001d054044,Zm00001d016802,Zm00001d030685,Zm00001d040705	4	Zm00001d043543,Zm00001d026154,Zm00001d009373,Zm00001d053839
GO:0015020	glucuronosyltransferase activity	molecular_function	0.22445	1	2	783	31	26932	2	Zm00001d015256,Zm00001d035494	0
GO:0002098	tRNA wobble uridine modification	biological_process	0.22566	1	1	783	9	26932	0		1	Zm00001d051608
GO:0006561	proline biosynthetic process	biological_process	0.22747	1	1	783	9	26932	0		1	Zm00001d008974
GO:0008652	cellular amino acid biosynthetic process	biological_process	0.22765	1	9	783	230	26932	7	Zm00001d013644,Zm00001d026531,Zm00001d046923,Zm00001d016006,Zm00001d028165,Zm00001d025333,Zm00001d048561	2	Zm00001d008974,Zm00001d034461
GO:1901617	organic hydroxy compound biosynthetic process	biological_process	0.22821	1	3	783	56	26932	0		3	Zm00001d014292,Zm00001d025545,Zm00001d049541
GO:0007568	aging	biological_process	0.22852	1	1	783	9	26932	1	Zm00001d028165	0
GO:0010150	leaf senescence	biological_process	0.22852	1	1	783	9	26932	1	Zm00001d028165	0
GO:0010260	organ senescence	biological_process	0.22852	1	1	783	9	26932	1	Zm00001d028165	0
GO:0006928	movement of cell or subcellular component	biological_process	0.2297	1	4	783	96	26932	2	Zm00001d029390,Zm00001d002937	2	Zm00001d045759,Zm00001d023840
GO:0015711	organic anion transport	biological_process	0.23017	1	4	783	87	26932	0		4	Zm00001d033493,Zm00001d019225,Zm00001d008974,Zm00001d013652
GO:0048653	anther development	biological_process	0.23168	1	1	783	9	26932	0		1	Zm00001d053895
GO:0010026	trichome differentiation	biological_process	0.23289	1	1	783	9	26932	1	Zm00001d053926	0
GO:0046483	heterocycle metabolic process	biological_process	0.2338	1	130	783	4288	26932	60	Novel01202,Novel01160,Zm00001d017462,Zm00001d009939,Zm00001d021962,Zm00001d017720,Novel01047,Zm00001d002358,Zm00001d050247,Zm00001d008203,Zm00001d024138,Zm00001d028083,Zm00001d039451,Zm00001d043025,Zm00001d013489,Novel00029,Zm00001d026685,Zm00001d038023,Zm00001d016866,Zm00001d013151,Zm00001d036396,Zm00001d020711,Zm00001d017751,Zm00001d019734,Novel00672,Zm00001d033181,Zm00001d014885,Zm00001d043663…	70	Zm00001d031934,Zm00001d039506,Zm00001d013013,Novel00789,Zm00001d013655,Zm00001d012707,Zm00001d008817,Novel01090,Zm00001d049541,Novel01032,Zm00001d026392,Zm00001d026421,Zm00001d026096,Zm00001d022526,Zm00001d034160,Zm00001d016298,Zm00001d026182,Zm00001d028984,Zm00001d026277,Zm00001d044321,Zm00001d015212,Zm00001d001838,Zm00001d027925,Zm00001d014772,Novel01082,Zm00001d051480,Zm00001d031241,Zm00001d04…
GO:0000062	fatty-acyl-CoA binding	molecular_function	0.23429	1	1	783	9	26932	0		1	Zm00001d024518
GO:0031406	carboxylic acid binding	molecular_function	0.23497	1	4	783	84	26932	3	Zm00001d046923,Zm00001d015032,Zm00001d025333	1	Zm00001d026677
GO:0043177	organic acid binding	molecular_function	0.23497	1	4	783	84	26932	3	Zm00001d025333,Zm00001d046923,Zm00001d015032	1	Zm00001d026677
GO:0006546	glycine catabolic process	biological_process	0.23825	1	1	783	9	26932	0		1	Zm00001d023437
GO:0009071	serine family amino acid catabolic process	biological_process	0.23825	1	1	783	9	26932	0		1	Zm00001d023437
GO:0034654	nucleobase-containing compound biosynthetic process	biological_process	0.23851	1	76	783	2387	26932	37	Zm00001d050247,Zm00001d034920,Zm00001d015226,Zm00001d043025,Zm00001d024768,Zm00001d036364,Zm00001d014628,Novel01202,Zm00001d017130,Zm00001d043663,Zm00001d019475,Zm00001d052564,Zm00001d022437,Zm00001d049743,Zm00001d017462,Zm00001d009939,Novel01047,Zm00001d029940,Zm00001d047523,Zm00001d019734,Zm00001d027530,Zm00001d033181,Zm00001d048991,Zm00001d016457,Zm00001d041886,Zm00001d043094,Zm00001d026447,Zm…	39	Zm00001d026096,Zm00001d026421,Zm00001d022526,Zm00001d016298,Zm00001d012128,Zm00001d034160,Zm00001d032144,Zm00001d026182,Zm00001d028984,Zm00001d006835,Zm00001d001838,Zm00001d039077,Novel01406,Zm00001d017477,Zm00001d027925,Zm00001d039506,Zm00001d021268,Zm00001d008817,Novel01032,Zm00001d035916,Zm00001d039032,Zm00001d046947,Zm00001d014568,Zm00001d044857,Zm00001d046751,Zm00001d010634,Novel01082,Zm0000…
GO:0007276	gamete generation	biological_process	0.23876	1	1	783	9	26932	0		1	Novel01469
GO:0008565	protein transporter activity	molecular_function	0.23998	1	3	783	60	26932	2	Zm00001d003913,Zm00001d008345	1	Zm00001d034309
GO:0005742	mitochondrial outer membrane translocase complex	cellular_component	0.24025	1	1	783	9	26932	0		1	Novel00092
GO:0098799	outer mitochondrial membrane protein complex	cellular_component	0.24025	1	1	783	9	26932	0		1	Novel00092
GO:0030522	intracellular receptor signaling pathway	biological_process	0.2417	1	1	783	10	26932	1	Novel01047	0
GO:0022857	transmembrane transporter activity	molecular_function	0.24194	1	29	783	891	26932	6	Zm00001d000196,Zm00001d042692,Zm00001d021461,Zm00001d018332,Zm00001d041308,Zm00001d051174	23	Zm00001d033067,Zm00001d045572,Zm00001d008974,Zm00001d000195,Zm00001d016794,Zm00001d000204,Zm00001d033493,Zm00001d045567,Novel01064,Zm00001d033446,Zm00001d053446,Zm00001d021629,Zm00001d037492,Zm00001d013652,Zm00001d028311,Zm00001d019225,Zm00001d021938,Zm00001d017249,Zm00001d040627,Zm00001d006697,Zm00001d028164,Zm00001d016619,Zm00001d051055
GO:0006807	nitrogen compound metabolic process	biological_process	0.24324	1	167	783	5517	26932	83	Zm00001d036364,Zm00001d009936,Zm00001d024768,Zm00001d002483,Zm00001d037860,Zm00001d052952,Zm00001d015226,Zm00001d034920,Zm00001d047523,Zm00001d029940,Zm00001d016963,Zm00001d014840,Zm00001d048561,Zm00001d049743,Zm00001d052564,Zm00001d019475,Zm00001d032046,Zm00001d022437,Zm00001d014628,Zm00001d043663,Zm00001d017130,Zm00001d010375,Zm00001d041886,Zm00001d048991,Zm00001d016457,Zm00001d025333,Zm00001d0…	84	Zm00001d017477,Novel01406,Zm00001d039077,Zm00001d040084,Zm00001d022557,Zm00001d015008,Zm00001d006835,Zm00001d032144,Zm00001d012128,Zm00001d024029,Zm00001d003522,Zm00001d051608,Zm00001d051634,Zm00001d034461,Zm00001d022630,Zm00001d021268,Zm00001d031685,Zm00001d046751,Novel00972,Zm00001d041814,Zm00001d039032,Novel00848,Zm00001d045320,Zm00001d016277,Novel00326,Zm00001d013126,Zm00001d008190,Zm00001d01…
GO:0008519	ammonium transmembrane transporter activity	molecular_function	0.24334	1	1	783	9	26932	0		1	Zm00001d017249
GO:0015696	ammonium transport	biological_process	0.24334	1	1	783	9	26932	0		1	Zm00001d017249
GO:0072488	ammonium transmembrane transport	biological_process	0.24334	1	1	783	9	26932	0		1	Zm00001d017249
GO:0006021	inositol biosynthetic process	biological_process	0.24343	1	1	783	9	26932	0		1	Zm00001d014292
GO:0042176	regulation of protein catabolic process	biological_process	0.24362	1	2	783	33	26932	0		2	Zm00001d050944,Novel01090
GO:0005372	water transmembrane transporter activity	molecular_function	0.24549	1	1	783	9	26932	1	Zm00001d051174	0
GO:0015250	water channel activity	molecular_function	0.24549	1	1	783	9	26932	1	Zm00001d051174	0
GO:0045333	cellular respiration	biological_process	0.24636	1	4	783	87	26932	0		4	Zm00001d014772,Novel00789,Novel00848,Zm00001d025690
GO:0006418	tRNA aminoacylation for protein translation	biological_process	0.24839	1	4	783	92	26932	2	Zm00001d015037,Zm00001d021962	2	Zm00001d031241,Zm00001d031685
GO:0016114	terpenoid biosynthetic process	biological_process	0.24856	1	2	783	33	26932	1	Zm00001d016714	1	Zm00001d025545
GO:0015035	protein disulfide oxidoreductase activity	molecular_function	0.24856	1	5	783	112	26932	1	Zm00001d051851	4	Zm00001d052034,Zm00001d023873,Zm00001d052769,Zm00001d023869
GO:0090575	RNA polymerase II transcription factor complex	cellular_component	0.24891	1	2	783	33	26932	1	Zm00001d026305	1	Zm00001d006835
GO:0006090	pyruvate metabolic process	biological_process	0.24901	1	5	783	115	26932	2	Zm00001d010375,Zm00001d024138	3	Zm00001d040084,Zm00001d036206,Zm00001d010321
GO:0009800	cinnamic acid biosynthetic process	biological_process	0.25224	1	1	783	10	26932	1	Zm00001d051166	0
GO:0009803	cinnamic acid metabolic process	biological_process	0.25224	1	1	783	10	26932	1	Zm00001d051166	0
GO:0045548	phenylalanine ammonia-lyase activity	molecular_function	0.25224	1	1	783	10	26932	1	Zm00001d051166	0
GO:0009584	detection of visible light	biological_process	0.25239	1	1	783	11	26932	1	Novel01559	0
GO:0072341	modified amino acid binding	molecular_function	0.25369	1	1	783	10	26932	1	Zm00001d024839	0
GO:0016109	tetraterpenoid biosynthetic process	biological_process	0.25374	1	1	783	10	26932	1	Zm00001d016714	0
GO:0016117	carotenoid biosynthetic process	biological_process	0.25374	1	1	783	10	26932	1	Zm00001d016714	0
GO:0009737	response to abscisic acid	biological_process	0.25386	1	3	783	61	26932	1	Zm00001d017130	2	Zm00001d012929,Zm00001d015212
GO:0015996	chlorophyll catabolic process	biological_process	0.25416	1	1	783	10	26932	0		1	Zm00001d031934
GO:0046149	pigment catabolic process	biological_process	0.25416	1	1	783	10	26932	0		1	Zm00001d031934
GO:0031329	regulation of cellular catabolic process	biological_process	0.25577	1	2	783	33	26932	0		2	Novel01090,Zm00001d050944
GO:0008375	acetylglucosaminyltransferase activity	molecular_function	0.25595	1	3	783	59	26932	2	Zm00001d047801,Zm00001d016103	1	Zm00001d013672
GO:0005911	cell-cell junction	cellular_component	0.25812	1	3	783	66	26932	0		3	Zm00001d015212,Zm00001d000204,Zm00001d046625
GO:0009506	plasmodesma	cellular_component	0.25812	1	3	783	66	26932	0		3	Zm00001d015212,Zm00001d000204,Zm00001d046625
GO:0030054	cell junction	cellular_component	0.25812	1	3	783	66	26932	0		3	Zm00001d015212,Zm00001d046625,Zm00001d000204
GO:0055044	symplast	cellular_component	0.25812	1	3	783	66	26932	0		3	Zm00001d046625,Zm00001d000204,Zm00001d015212
GO:0007094	mitotic spindle assembly checkpoint	biological_process	0.25905	1	1	783	10	26932	0		1	Zm00001d050944
GO:0009895	negative regulation of catabolic process	biological_process	0.25905	1	1	783	10	26932	0		1	Zm00001d050944
GO:0031330	negative regulation of cellular catabolic process	biological_process	0.25905	1	1	783	10	26932	0		1	Zm00001d050944
GO:0031577	spindle checkpoint	biological_process	0.25905	1	1	783	10	26932	0		1	Zm00001d050944
GO:0032435	negative regulation of proteasomal ubiquitin-dependent protein catabolic process	biological_process	0.25905	1	1	783	10	26932	0		1	Zm00001d050944
GO:0033046	negative regulation of sister chromatid segregation	biological_process	0.25905	1	1	783	10	26932	0		1	Zm00001d050944
GO:0033048	negative regulation of mitotic sister chromatid segregation	biological_process	0.25905	1	1	783	10	26932	0		1	Zm00001d050944
GO:0042177	negative regulation of protein catabolic process	biological_process	0.25905	1	1	783	10	26932	0		1	Zm00001d050944
GO:0045839	negative regulation of mitotic nuclear division	biological_process	0.25905	1	1	783	10	26932	0		1	Zm00001d050944
GO:0045841	negative regulation of mitotic metaphase/anaphase transition	biological_process	0.25905	1	1	783	10	26932	0		1	Zm00001d050944
GO:0051436	negative regulation of ubiquitin-protein ligase activity involved in mitotic cell cycle	biological_process	0.25905	1	1	783	10	26932	0		1	Zm00001d050944
GO:0051439	regulation of ubiquitin-protein ligase activity involved in mitotic cell cycle	biological_process	0.25905	1	1	783	10	26932	0		1	Zm00001d050944
GO:0051985	negative regulation of chromosome segregation	biological_process	0.25905	1	1	783	10	26932	0		1	Zm00001d050944
GO:0071173	spindle assembly checkpoint	biological_process	0.25905	1	1	783	10	26932	0		1	Zm00001d050944
GO:0071174	mitotic spindle checkpoint	biological_process	0.25905	1	1	783	10	26932	0		1	Zm00001d050944
GO:1901799	negative regulation of proteasomal protein catabolic process	biological_process	0.25905	1	1	783	10	26932	0		1	Zm00001d050944
GO:1902100	negative regulation of metaphase/anaphase transition of cell cycle	biological_process	0.25905	1	1	783	10	26932	0		1	Zm00001d050944
GO:1903051	negative regulation of proteolysis involved in cellular protein catabolic process	biological_process	0.25905	1	1	783	10	26932	0		1	Zm00001d050944
GO:1903363	negative regulation of cellular protein catabolic process	biological_process	0.25905	1	1	783	10	26932	0		1	Zm00001d050944
GO:2000816	negative regulation of mitotic sister chromatid separation	biological_process	0.25905	1	1	783	10	26932	0		1	Zm00001d050944
GO:0005385	zinc ion transmembrane transporter activity	molecular_function	0.25906	1	1	783	10	26932	0		1	Zm00001d033446
GO:0071577	zinc II ion transmembrane transport	biological_process	0.25906	1	1	783	10	26932	0		1	Zm00001d033446
GO:0016782	transferase activity, transferring sulfur-containing groups	molecular_function	0.26212	1	2	783	33	26932	0		2	Zm00001d051608,Zm00001d016850
GO:0060589	nucleoside-triphosphatase regulator activity	molecular_function	0.26282	1	4	783	90	26932	2	Zm00001d007340,Zm00001d017187	2	Novel01815,Zm00001d021087
GO:0009579	thylakoid	cellular_component	0.26417	1	10	783	261	26932	8	Zm00001d054015,Zm00001d021245,Zm00001d004978,Zm00001d047581,Zm00001d002490,Zm00001d045144,Zm00001d049743,Zm00001d011069	2	Novel01204,Novel00894
GO:0009605	response to external stimulus	biological_process	0.26476	1	7	783	187	26932	5	Novel01559,Zm00001d048950,Zm00001d011069,Zm00001d028165,Zm00001d048949	2	Zm00001d019225,Zm00001d026139
GO:0017089	glycolipid transporter activity	molecular_function	0.26483	1	1	783	10	26932	0		1	Zm00001d013445
GO:0046836	glycolipid transport	biological_process	0.26483	1	1	783	10	26932	0		1	Zm00001d013445
GO:0051861	glycolipid binding	molecular_function	0.26483	1	1	783	10	26932	0		1	Zm00001d013445
GO:0005732	small nucleolar ribonucleoprotein complex	cellular_component	0.26595	1	1	783	10	26932	1	Zm00001d052952	0
GO:0034754	cellular hormone metabolic process	biological_process	0.26655	1	2	783	33	26932	1	Zm00001d032046	1	Zm00001d049541
GO:0050794	regulation of cellular process	biological_process	0.26655	1	93	783	2981	26932	46	Zm00001d049743,Novel01202,Zm00001d043663,Zm00001d017130,Zm00001d014628,Zm00001d018332,Zm00001d022437,Zm00001d019475,Zm00001d026360,Zm00001d052564,Zm00001d016786,Zm00001d029940,Novel01047,Novel01296,Zm00001d047523,Zm00001d028165,Zm00001d017462,Zm00001d009939,Zm00001d015747,Zm00001d034920,Zm00001d015226,Zm00001d050247,Zm00001d037969,Zm00001d016714,Zm00001d012335,Zm00001d024768,Zm00001d043025,Zm0000…	47	Zm00001d021268,Zm00001d039506,Zm00001d050944,Zm00001d042867,Novel01812,Novel01090,Zm00001d008817,Novel01469,Novel01032,Zm00001d034160,Zm00001d012128,Zm00001d016298,Zm00001d023873,Zm00001d026182,Zm00001d032144,Zm00001d026096,Zm00001d022526,Zm00001d053446,Zm00001d001838,Zm00001d027925,Zm00001d039077,Novel01406,Zm00001d017477,Zm00001d028984,Zm00001d006835,Zm00001d052034,Zm00001d010634,Novel01082,Zm0…
GO:0006020	inositol metabolic process	biological_process	0.26675	1	1	783	10	26932	0		1	Zm00001d014292
GO:0003872	6-phosphofructokinase activity	molecular_function	0.26788	1	2	783	34	26932	1	Zm00001d010375	1	Zm00001d036206
GO:0061615	glycolytic process through fructose-6-phosphate	biological_process	0.26788	1	2	783	34	26932	1	Zm00001d010375	1	Zm00001d036206
GO:0016765	transferase activity, transferring alkyl or aryl (other than methyl) groups	molecular_function	0.26802	1	4	783	87	26932	2	Zm00001d024839,Zm00001d018220	2	Zm00001d022557,Zm00001d013655
GO:0009698	phenylpropanoid metabolic process	biological_process	0.26811	1	2	783	35	26932	1	Zm00001d051166	1	Zm00001d049541
GO:0007050	cell cycle arrest	biological_process	0.26864	1	1	783	10	26932	1	Novel01047	0
GO:0022627	cytosolic small ribosomal subunit	cellular_component	0.26864	1	1	783	10	26932	1	Zm00001d027919	0
GO:2001070	starch binding	molecular_function	0.26957	1	1	783	12	26932	0		1	Zm00001d002256
GO:0004448	isocitrate dehydrogenase activity	molecular_function	0.27086	1	1	783	11	26932	0		1	Zm00001d025690
GO:0048584	positive regulation of response to stimulus	biological_process	0.27183	1	2	783	36	26932	1	Zm00001d043325	1	Zm00001d026139
GO:0009627	systemic acquired resistance	biological_process	0.2727	1	1	783	11	26932	1	Zm00001d028165	0
GO:0006275	regulation of DNA replication	biological_process	0.27312	1	1	783	11	26932	1	Zm00001d014885	0
GO:0006559	L-phenylalanine catabolic process	biological_process	0.27513	1	1	783	11	26932	1	Zm00001d051166	0
GO:1902222	erythrose 4-phosphate/phosphoenolpyruvate family amino acid catabolic process	biological_process	0.27513	1	1	783	11	26932	1	Zm00001d051166	0
GO:0000145	exocyst	cellular_component	0.27657	1	3	783	65	26932	1	Zm00001d050462	2	Zm00001d034208,Zm00001d052245
GO:0000151	ubiquitin ligase complex	cellular_component	0.27665	1	2	783	37	26932	0		2	Novel01090,Zm00001d050944
GO:0031407	oxylipin metabolic process	biological_process	0.27699	1	1	783	12	26932	1	Zm00001d031449	0
GO:0031408	oxylipin biosynthetic process	biological_process	0.27699	1	1	783	12	26932	1	Zm00001d031449	0
GO:1901988	negative regulation of cell cycle phase transition	biological_process	0.27804	1	1	783	11	26932	0		1	Zm00001d050944
GO:1901991	negative regulation of mitotic cell cycle phase transition	biological_process	0.27804	1	1	783	11	26932	0		1	Zm00001d050944
GO:0008757	S-adenosylmethionine-dependent methyltransferase activity	molecular_function	0.2782	1	4	783	96	26932	2	Zm00001d020437,Zm00001d037860	2	Zm00001d049541,Zm00001d049966
GO:0010215	cellulose microfibril organization	biological_process	0.27846	1	1	783	11	26932	0		1	Zm00001d047276
GO:0070726	cell wall assembly	biological_process	0.27846	1	1	783	11	26932	0		1	Zm00001d047276
GO:0071668	plant-type cell wall assembly	biological_process	0.27846	1	1	783	11	26932	0		1	Zm00001d047276
GO:0008047	enzyme activator activity	molecular_function	0.27859	1	3	783	65	26932	1	Zm00001d007340	2	Zm00001d021087,Novel01815
GO:0001101	response to acid chemical	biological_process	0.27911	1	5	783	123	26932	2	Zm00001d017130,Zm00001d028165	3	Zm00001d015212,Novel00972,Zm00001d012929
GO:0003824	catalytic activity	molecular_function	0.27946	1	368	783	12509	26932	189	Zm00001d025943,Zm00001d018665,Zm00001d030685,Zm00001d023480,Zm00001d023863,Zm00001d016435,Zm00001d016806,Zm00001d026531,Zm00001d026018,Zm00001d025333,Zm00001d043344,Zm00001d044157,Zm00001d007687,Zm00001d007869,Zm00001d026060,Zm00001d051166,Zm00001d027876,Zm00001d003212,Zm00001d051928,Zm00001d001960,Zm00001d015747,Zm00001d008427,Zm00001d035081,Zm00001d009473,Zm00001d035246,Zm00001d044806,Zm00001d0…	179	Zm00001d033907,Zm00001d020717,Novel00848,Zm00001d025354,Zm00001d014261,Zm00001d036175,Zm00001d013606,Zm00001d037507,Zm00001d035899,Zm00001d021283,Zm00001d041814,Zm00001d023869,Zm00001d000279,Zm00001d032090,Zm00001d016850,Zm00001d050917,Zm00001d021231,Novel01064,Zm00001d052136,Zm00001d040733,Zm00001d024071,Zm00001d053897,Zm00001d003522,Zm00001d013035,Zm00001d044566,Zm00001d046127,Zm00001d013573,Zm…
GO:0042803	protein homodimerization activity	molecular_function	0.28008	1	2	783	37	26932	2	Zm00001d017187,Zm00001d024839	0
GO:0046653	tetrahydrofolate metabolic process	biological_process	0.28019	1	1	783	11	26932	1	Zm00001d026531	0
GO:0042127	regulation of cell proliferation	biological_process	0.28066	1	1	783	12	26932	1	Novel01047	0
GO:0015036	disulfide oxidoreductase activity	molecular_function	0.28099	1	5	783	118	26932	1	Zm00001d051851	4	Zm00001d023873,Zm00001d052769,Zm00001d023869,Zm00001d052034
GO:0043038	amino acid activation	biological_process	0.28148	1	4	783	97	26932	2	Zm00001d015037,Zm00001d021962	2	Zm00001d031685,Zm00001d031241
GO:0043039	tRNA aminoacylation	biological_process	0.28148	1	4	783	97	26932	2	Zm00001d021962,Zm00001d015037	2	Zm00001d031241,Zm00001d031685
GO:0034220	ion transmembrane transport	biological_process	0.28159	1	14	783	418	26932	2	Zm00001d021461,Zm00001d041308	12	Zm00001d051055,Zm00001d016619,Zm00001d028164,Zm00001d000204,Zm00001d033493,Zm00001d040627,Zm00001d017249,Zm00001d008974,Zm00001d013652,Zm00001d053446,Zm00001d033446,Zm00001d033067
GO:0006829	zinc II ion transport	biological_process	0.2819	1	1	783	11	26932	0		1	Zm00001d033446
GO:0090502	RNA phosphodiester bond hydrolysis, endonucleolytic	biological_process	0.282	1	2	783	37	26932	1	Zm00001d039451	1	Zm00001d022630
GO:0009651	response to salt stress	biological_process	0.28243	1	3	783	66	26932	1	Zm00001d017130	2	Zm00001d012929,Zm00001d026139
GO:0047325	inositol tetrakisphosphate 1-kinase activity	molecular_function	0.28244	1	1	783	11	26932	0		1	Zm00001d033907
GO:0052725	inositol-1,3,4-trisphosphate 6-kinase activity	molecular_function	0.28244	1	1	783	11	26932	0		1	Zm00001d033907
GO:0052726	inositol-1,3,4-trisphosphate 5-kinase activity	molecular_function	0.28244	1	1	783	11	26932	0		1	Zm00001d033907
GO:0043244	regulation of protein complex disassembly	biological_process	0.28398	1	1	783	11	26932	0		1	Novel01812
GO:0004332	fructose-bisphosphate aldolase activity	molecular_function	0.28407	1	1	783	11	26932	0		1	Zm00001d040084
GO:0016655	oxidoreductase activity, acting on NAD(P)H, quinone or similar compound as acceptor	molecular_function	0.28438	1	2	783	35	26932	0		2	Zm00001d043619,Novel00848
GO:0008121	ubiquinol-cytochrome-c reductase activity	molecular_function	0.28473	1	1	783	11	26932	0		1	Zm00001d016619
GO:0016681	oxidoreductase activity, acting on diphenols and related substances as donors, cytochrome as acceptor	molecular_function	0.28473	1	1	783	11	26932	0		1	Zm00001d016619
GO:0004525	ribonuclease III activity	molecular_function	0.28496	1	1	783	13	26932	1	Zm00001d039451	0
GO:0032296	double-stranded RNA-specific ribonuclease activity	molecular_function	0.28496	1	1	783	13	26932	1	Zm00001d039451	0
GO:0002097	tRNA wobble base modification	biological_process	0.28716	1	1	783	12	26932	0		1	Zm00001d051608
GO:0008443	phosphofructokinase activity	molecular_function	0.28784	1	2	783	36	26932	1	Zm00001d010375	1	Zm00001d036206
GO:0006560	proline metabolic process	biological_process	0.28953	1	1	783	12	26932	0		1	Zm00001d008974
GO:1901070	guanosine-containing compound biosynthetic process	biological_process	0.28991	1	1	783	11	26932	1	Zm00001d026685	0
GO:0004842	ubiquitin-protein transferase activity	molecular_function	0.29006	1	6	783	160	26932	4	Zm00001d044734,Zm00001d029847,Zm00001d023480,Zm00001d024672	2	Zm00001d050712,Zm00001d053897
GO:0001522	pseudouridine synthesis	biological_process	0.29051	1	2	783	37	26932	2	Zm00001d036396,Zm00001d052952	0
GO:0006606	protein import into nucleus	biological_process	0.29069	1	1	783	12	26932	1	Zm00001d008345	0
GO:0034504	protein localization to nucleus	biological_process	0.29069	1	1	783	12	26932	1	Zm00001d008345	0
GO:0044744	protein targeting to nucleus	biological_process	0.29069	1	1	783	12	26932	1	Zm00001d008345	0
GO:0051170	nuclear import	biological_process	0.29069	1	1	783	12	26932	1	Zm00001d008345	0
GO:1902593	single-organism nuclear import	biological_process	0.29069	1	1	783	12	26932	1	Zm00001d008345	0
GO:0008970	phosphatidylcholine 1-acylhydrolase activity	molecular_function	0.29116	1	1	783	11	26932	0		1	Zm00001d011477
GO:0046034	ATP metabolic process	biological_process	0.29346	1	7	783	183	26932	2	Zm00001d024138,Zm00001d010375	5	Novel00848,Novel00789,Zm00001d036206,Zm00001d014772,Zm00001d040084
GO:0004521	endoribonuclease activity	molecular_function	0.29348	1	2	783	38	26932	1	Zm00001d039451	1	Zm00001d022630
GO:0016423	tRNA (guanine) methyltransferase activity	molecular_function	0.29359	1	1	783	12	26932	1	Zm00001d037860	0
GO:0005509	calcium ion binding	molecular_function	0.29493	1	12	783	343	26932	5	Zm00001d041430,Zm00001d053926,Zm00001d026018,Zm00001d022234,Zm00001d007015	7	Zm00001d014559,Zm00001d026139,Zm00001d020722,Zm00001d043144,Zm00001d014271,Zm00001d051800,Zm00001d043543
GO:0007093	mitotic cell cycle checkpoint	biological_process	0.29544	1	1	783	12	26932	0		1	Zm00001d050944
GO:0045930	negative regulation of mitotic cell cycle	biological_process	0.29544	1	1	783	12	26932	0		1	Zm00001d050944
GO:0007346	regulation of mitotic cell cycle	biological_process	0.29742	1	2	783	37	26932	0		2	Novel01090,Zm00001d050944
GO:0000904	cell morphogenesis involved in differentiation	biological_process	0.29836	1	1	783	12	26932	1	Zm00001d053926	0
GO:0045156	electron transporter, transferring electrons within the cyclic electron transport pathway of photosynthesis activity	molecular_function	0.29887	1	1	783	12	26932	1	Novel00001	0
GO:0009967	positive regulation of signal transduction	biological_process	0.29965	1	1	783	12	26932	1	Zm00001d043325	0
GO:0023056	positive regulation of signaling	biological_process	0.29965	1	1	783	12	26932	1	Zm00001d043325	0
GO:0016106	sesquiterpenoid biosynthetic process	biological_process	0.30131	1	1	783	12	26932	0		1	Zm00001d025545
GO:0009108	coenzyme biosynthetic process	biological_process	0.302	1	5	783	126	26932	3	Zm00001d026531,Novel00672,Zm00001d016866	2	Zm00001d016850,Zm00001d051608
GO:0009725	response to hormone	biological_process	0.30296	1	12	783	346	26932	6	Zm00001d013619,Zm00001d012335,Zm00001d033463,Zm00001d033462,Zm00001d047581,Zm00001d017130	6	Zm00001d052148,Zm00001d025947,Zm00001d012929,Zm00001d016277,Zm00001d015212,Zm00001d042345
GO:0032957	inositol trisphosphate metabolic process	biological_process	0.304	1	1	783	12	26932	0		1	Zm00001d033907
GO:0006833	water transport	biological_process	0.30419	1	1	783	12	26932	1	Zm00001d051174	0
GO:0042044	fluid transport	biological_process	0.30419	1	1	783	12	26932	1	Zm00001d051174	0
GO:0005978	glycogen biosynthetic process	biological_process	0.30583	1	1	783	13	26932	0		1	Zm00001d003817
GO:0006073	cellular glucan metabolic process	biological_process	0.3059	1	7	783	197	26932	0		7	Zm00001d044566,Zm00001d003817,Zm00001d024071,Zm00001d046127,Zm00001d045261,Zm00001d012159,Zm00001d019479
GO:0044042	glucan metabolic process	biological_process	0.3059	1	7	783	197	26932	0		7	Zm00001d019479,Zm00001d045261,Zm00001d012159,Zm00001d003817,Zm00001d046127,Zm00001d024071,Zm00001d044566
GO:0006869	lipid transport	biological_process	0.30682	1	3	783	68	26932	1	Zm00001d044686	2	Zm00001d013445,Zm00001d038911
GO:0070069	cytochrome complex	cellular_component	0.3089	1	1	783	12	26932	0		1	Novel00894
GO:0004834	tryptophan synthase activity	molecular_function	0.30977	1	1	783	12	26932	0		1	Zm00001d034461
GO:0046165	alcohol biosynthetic process	biological_process	0.31091	1	2	783	38	26932	0		2	Zm00001d025545,Zm00001d014292
GO:0048443	stamen development	biological_process	0.31175	1	1	783	13	26932	0		1	Zm00001d053895
GO:0048466	androecium development	biological_process	0.31175	1	1	783	13	26932	0		1	Zm00001d053895
GO:0031072	heat shock protein binding	molecular_function	0.31182	1	2	783	38	26932	1	Zm00001d016714	1	Zm00001d029722
GO:0051782	negative regulation of cell division	biological_process	0.3125	1	1	783	13	26932	0		1	Zm00001d050944
GO:0051784	negative regulation of nuclear division	biological_process	0.3125	1	1	783	13	26932	0		1	Zm00001d050944
GO:0005739	mitochondrion	cellular_component	0.31264	1	16	783	469	26932	5	Zm00001d017187,Novel00087,Zm00001d007092,Zm00001d016866,Zm00001d021962	11	Zm00001d008974,Zm00001d005695,Zm00001d014772,Novel00092,Zm00001d016864,Zm00001d015431,Zm00001d048583,Zm00001d020722,Zm00001d016619,Zm00001d051055,Zm00001d042600
GO:0019787	ubiquitin-like protein transferase activity	molecular_function	0.31282	1	6	783	165	26932	4	Zm00001d044734,Zm00001d029847,Zm00001d024672,Zm00001d023480	2	Zm00001d050712,Zm00001d053897
GO:0009583	detection of light stimulus	biological_process	0.31379	1	1	783	14	26932	1	Novel01559	0
GO:0016108	tetraterpenoid metabolic process	biological_process	0.31417	1	1	783	13	26932	1	Zm00001d016714	0
GO:0016116	carotenoid metabolic process	biological_process	0.31417	1	1	783	13	26932	1	Zm00001d016714	0
GO:0003677	DNA binding	molecular_function	0.31604	1	80	783	2590	26932	44	Zm00001d016457,Zm00001d048991,Zm00001d019045,Zm00001d041886,Zm00001d019734,Zm00001d027530,Zm00001d013151,Zm00001d038023,Zm00001d020711,Zm00001d026305,Zm00001d037607,Zm00001d026447,Zm00001d034479,Zm00001d043094,Zm00001d021422,Novel00173,Zm00001d015283,Zm00001d039531,Zm00001d009619,Zm00001d011515,Zm00001d008853,Zm00001d036364,Zm00001d024768,Zm00001d043025,Zm00001d015226,Zm00001d034920,Zm00001d05024…	36	Zm00001d039032,Zm00001d014568,Zm00001d046751,Zm00001d044857,Zm00001d046947,Zm00001d051788,Zm00001d042463,Zm00001d051480,Novel00326,Zm00001d053895,Zm00001d016801,Novel01548,Zm00001d008190,Zm00001d027431,Zm00001d012413,Zm00001d048527,Zm00001d010634,Zm00001d006835,Zm00001d028984,Zm00001d027925,Zm00001d017477,Zm00001d039077,Zm00001d001838,Zm00001d022526,Zm00001d026421,Zm00001d026096,Zm00001d026182,Zm…
GO:0050660	flavin adenine dinucleotide binding	molecular_function	0.31616	1	6	783	161	26932	4	Zm00001d037005,Zm00001d051130,Zm00001d032046,Zm00001d016841	2	Zm00001d025545,Zm00001d017598
GO:0009126	purine nucleoside monophosphate metabolic process	biological_process	0.31695	1	8	783	219	26932	3	Zm00001d024138,Zm00001d010375,Zm00001d026685	5	Novel00789,Zm00001d014772,Novel00848,Zm00001d036206,Zm00001d040084
GO:0009167	purine ribonucleoside monophosphate metabolic process	biological_process	0.31695	1	8	783	219	26932	3	Zm00001d010375,Zm00001d026685,Zm00001d024138	5	Zm00001d040084,Zm00001d036206,Zm00001d014772,Novel00789,Novel00848
GO:0065004	protein-DNA complex assembly	biological_process	0.31865	1	3	783	67	26932	3	Zm00001d021422,Zm00001d034479,Zm00001d038851	0
GO:0008168	methyltransferase activity	molecular_function	0.31927	1	17	783	512	26932	9	Zm00001d044765,Zm00001d009084,Zm00001d027451,Zm00001d037860,Zm00001d029359,Zm00001d020437,Zm00001d013644,Zm00001d047192,Zm00001d048087	8	Zm00001d044120,Zm00001d049179,Zm00001d004109,Zm00001d049541,Zm00001d043734,Zm00001d013035,Zm00001d049966,Zm00001d032703
GO:0015075	ion transmembrane transporter activity	molecular_function	0.32055	1	17	783	532	26932	3	Zm00001d018332,Zm00001d021461,Zm00001d041308	14	Zm00001d008974,Novel01064,Zm00001d033493,Zm00001d000204,Zm00001d033067,Zm00001d040627,Zm00001d017249,Zm00001d016619,Zm00001d051055,Zm00001d028164,Zm00001d013652,Zm00001d053446,Zm00001d033446,Zm00001d019225
GO:0051302	regulation of cell division	biological_process	0.3218	1	2	783	40	26932	0		2	Novel01090,Zm00001d050944
GO:0009719	response to endogenous stimulus	biological_process	0.32261	1	12	783	352	26932	6	Zm00001d012335,Zm00001d033463,Zm00001d013619,Zm00001d017130,Zm00001d047581,Zm00001d033462	6	Zm00001d015212,Zm00001d012929,Zm00001d016277,Zm00001d052148,Zm00001d025947,Zm00001d042345
GO:0006207	'de novo' pyrimidine nucleobase biosynthetic process	biological_process	0.32274	1	1	783	13	26932	0		1	Zm00001d035916
GO:0006714	sesquiterpenoid metabolic process	biological_process	0.32285	1	1	783	13	26932	0		1	Zm00001d025545
GO:0006721	terpenoid metabolic process	biological_process	0.32364	1	2	783	40	26932	1	Zm00001d016714	1	Zm00001d025545
GO:0016837	carbon-oxygen lyase activity, acting on polysaccharides	molecular_function	0.32407	1	1	783	13	26932	0		1	Zm00001d017416
GO:0030570	pectate lyase activity	molecular_function	0.32407	1	1	783	13	26932	0		1	Zm00001d017416
GO:0050664	oxidoreductase activity, acting on NAD(P)H, oxygen as acceptor	molecular_function	0.32457	1	1	783	15	26932	0		1	Zm00001d043543
GO:0004190	aspartic-type endopeptidase activity	molecular_function	0.32619	1	6	783	158	26932	2	Zm00001d020886,Zm00001d007753	4	Zm00001d005859,Zm00001d002833,Zm00001d051779,Zm00001d016477
GO:0070001	aspartic-type peptidase activity	molecular_function	0.32619	1	6	783	158	26932	2	Zm00001d007753,Zm00001d020886	4	Zm00001d005859,Zm00001d016477,Zm00001d051779,Zm00001d002833
GO:0030029	actin filament-based process	biological_process	0.3263	1	3	783	70	26932	1	Zm00001d032131	2	Zm00001d035629,Novel01812
GO:0030036	actin cytoskeleton organization	biological_process	0.3263	1	3	783	70	26932	1	Zm00001d032131	2	Zm00001d035629,Novel01812
GO:0045454	cell redox homeostasis	biological_process	0.32656	1	7	783	188	26932	3	Zm00001d015747,Zm00001d051851,Zm00001d016786	4	Zm00001d023873,Zm00001d052769,Zm00001d023869,Zm00001d052034
GO:0072350	tricarboxylic acid metabolic process	biological_process	0.32672	1	3	783	70	26932	0		3	Zm00001d025690,Zm00001d013655,Zm00001d022557
GO:0004519	endonuclease activity	molecular_function	0.3269	1	4	783	103	26932	2	Zm00001d017751,Zm00001d039451	2	Zm00001d016801,Zm00001d022630
GO:0033692	cellular polysaccharide biosynthetic process	biological_process	0.3269	1	5	783	140	26932	0		5	Zm00001d019479,Zm00001d045261,Zm00001d046127,Zm00001d003817,Zm00001d044566
GO:0071824	protein-DNA complex subunit organization	biological_process	0.32712	1	3	783	68	26932	3	Zm00001d038851,Zm00001d021422,Zm00001d034479	0
GO:0044798	nuclear transcription factor complex	cellular_component	0.32823	1	2	783	41	26932	1	Zm00001d026305	1	Zm00001d006835
GO:0045300	acyl-[acyl-carrier-protein] desaturase activity	molecular_function	0.32843	1	1	783	13	26932	0		1	Zm00001d025170
GO:0003779	actin binding	molecular_function	0.32881	1	4	783	108	26932	1	Zm00001d014376	3	Zm00001d013276,Novel01812,Zm00001d035629
GO:0007067	mitotic nuclear division	biological_process	0.33024	1	2	783	42	26932	0		2	Novel01090,Zm00001d050944
GO:0022891	substrate-specific transmembrane transporter activity	molecular_function	0.33039	1	20	783	632	26932	4	Zm00001d041308,Zm00001d051174,Zm00001d021461,Zm00001d018332	16	Zm00001d017249,Zm00001d040627,Zm00001d006697,Zm00001d028164,Zm00001d051055,Zm00001d016619,Zm00001d033446,Zm00001d053446,Zm00001d013652,Zm00001d019225,Zm00001d021938,Zm00001d008974,Zm00001d000204,Zm00001d033493,Novel01064,Zm00001d033067
GO:0042445	hormone metabolic process	biological_process	0.3313	1	2	783	39	26932	1	Zm00001d032046	1	Zm00001d049541
GO:0006479	protein methylation	biological_process	0.33141	1	3	783	73	26932	1	Zm00001d020437	2	Zm00001d049966,Zm00001d004109
GO:0008213	protein alkylation	biological_process	0.33141	1	3	783	73	26932	1	Zm00001d020437	2	Zm00001d004109,Zm00001d049966
GO:2001251	negative regulation of chromosome organization	biological_process	0.3316	1	1	783	14	26932	0		1	Zm00001d050944
GO:0010876	lipid localization	biological_process	0.33207	1	3	783	71	26932	1	Zm00001d044686	2	Zm00001d038911,Zm00001d013445
GO:0009144	purine nucleoside triphosphate metabolic process	biological_process	0.33284	1	7	783	191	26932	2	Zm00001d010375,Zm00001d024138	5	Zm00001d014772,Zm00001d040084,Novel00789,Zm00001d036206,Novel00848
GO:0009205	purine ribonucleoside triphosphate metabolic process	biological_process	0.33284	1	7	783	191	26932	2	Zm00001d024138,Zm00001d010375	5	Novel00848,Zm00001d036206,Novel00789,Zm00001d040084,Zm00001d014772
GO:0006813	potassium ion transport	biological_process	0.33289	1	3	783	77	26932	1	Zm00001d041308	2	Zm00001d033067,Zm00001d053446
GO:1901615	organic hydroxy compound metabolic process	biological_process	0.33362	1	4	783	101	26932	0		4	Zm00001d025545,Zm00001d049541,Zm00001d014292,Zm00001d033907
GO:0009581	detection of external stimulus	biological_process	0.3342	1	1	783	15	26932	1	Novel01559	0
GO:0009582	detection of abiotic stimulus	biological_process	0.3342	1	1	783	15	26932	1	Novel01559	0
GO:0006401	RNA catabolic process	biological_process	0.33426	1	2	783	43	26932	0		2	Zm00001d026392,Zm00001d015372
GO:0016841	ammonia-lyase activity	molecular_function	0.3343	1	1	783	14	26932	1	Zm00001d051166	0
GO:0022804	active transmembrane transporter activity	molecular_function	0.33512	1	11	783	343	26932	4	Zm00001d021461,Zm00001d042692,Zm00001d000196,Zm00001d041308	7	Zm00001d000204,Zm00001d028164,Zm00001d016794,Zm00001d000195,Zm00001d028311,Zm00001d037492,Zm00001d021629
GO:0009069	serine family amino acid metabolic process	biological_process	0.33608	1	2	783	40	26932	1	Zm00001d046923	1	Zm00001d023437
GO:0006887	exocytosis	biological_process	0.3372	1	3	783	73	26932	1	Zm00001d050462	2	Zm00001d052245,Zm00001d034208
GO:0006820	anion transport	biological_process	0.33726	1	6	783	169	26932	0		6	Zm00001d019225,Zm00001d028164,Zm00001d000204,Zm00001d033493,Zm00001d008974,Zm00001d013652
GO:0006096	glycolytic process	biological_process	0.33942	1	4	783	100	26932	2	Zm00001d024138,Zm00001d010375	2	Zm00001d036206,Zm00001d040084
GO:0006757	ATP generation from ADP	biological_process	0.33942	1	4	783	100	26932	2	Zm00001d024138,Zm00001d010375	2	Zm00001d036206,Zm00001d040084
GO:0046031	ADP metabolic process	biological_process	0.33942	1	4	783	100	26932	2	Zm00001d024138,Zm00001d010375	2	Zm00001d036206,Zm00001d040084
GO:0010033	response to organic substance	biological_process	0.34066	1	13	783	394	26932	7	Zm00001d017130,Zm00001d028165,Zm00001d033462,Zm00001d047581,Zm00001d012335,Zm00001d033463,Zm00001d013619	6	Zm00001d042345,Zm00001d015212,Zm00001d016277,Zm00001d012929,Zm00001d052148,Zm00001d025947
GO:0034645	cellular macromolecule biosynthetic process	biological_process	0.34155	1	106	783	3470	26932	51	Zm00001d011596,Zm00001d027530,Zm00001d015204,Zm00001d019734,Zm00001d003411,Zm00001d014885,Zm00001d041886,Zm00001d048991,Zm00001d015037,Zm00001d016457,Zm00001d033181,Zm00001d007092,Zm00001d043325,Zm00001d036129,Zm00001d009619,Zm00001d039531,Zm00001d027271,Zm00001d018096,Zm00001d043094,Zm00001d026447,Zm00001d034724,Zm00001d026305,Zm00001d020711,Zm00001d037607,Zm00001d013151,Novel01559,Zm00001d02791…	55	Zm00001d013052,Zm00001d014568,Zm00001d044857,Zm00001d046751,Zm00001d046947,Zm00001d041389,Novel00972,Zm00001d039032,Zm00001d028603,Zm00001d041453,Novel01082,Zm00001d010634,Zm00001d003817,Novel01548,Zm00001d016277,Zm00001d045320,Novel00326,Zm00001d015917,Zm00001d013126,Zm00001d027431,Zm00001d012413,Zm00001d008190,Zm00001d042463,Zm00001d051480,Zm00001d031241,Zm00001d032144,Zm00001d026182,Zm00001d01…
GO:0010647	positive regulation of cell communication	biological_process	0.34211	1	1	783	14	26932	1	Zm00001d043325	0
GO:0016567	protein ubiquitination	biological_process	0.34217	1	7	783	202	26932	4	Zm00001d044734,Zm00001d024672,Zm00001d023480,Zm00001d029847	3	Zm00001d053897,Zm00001d050944,Zm00001d050712
GO:0046173	polyol biosynthetic process	biological_process	0.3423	1	1	783	14	26932	0		1	Zm00001d014292
GO:0044282	small molecule catabolic process	biological_process	0.34235	1	3	783	71	26932	1	Zm00001d051166	2	Zm00001d023437,Zm00001d051194
GO:0009894	regulation of catabolic process	biological_process	0.34257	1	2	783	42	26932	0		2	Novel01090,Zm00001d050944
GO:0005515	protein binding	molecular_function	0.34287	1	48	783	1557	26932	24	Zm00001d029390,Zm00001d019045,Novel00020,Zm00001d020705,Zm00001d017187,Zm00001d016714,Novel00672,Zm00001d008570,Zm00001d002937,Zm00001d029359,Novel01559,Zm00001d014376,Zm00001d024839,Zm00001d023843,Novel00377,Zm00001d021422,Zm00001d038612,Zm00001d013114,Zm00001d026360,Zm00001d048087,Zm00001d047192,Zm00001d052809,Novel00504,Zm00001d008853	24	Zm00001d015221,Novel01103,Zm00001d016159,Zm00001d046781,Novel00848,Novel01201,Novel00495,Zm00001d027987,Zm00001d049541,Zm00001d013276,Zm00001d045759,Novel01469,Novel00549,Zm00001d053895,Zm00001d049179,Novel01812,Zm00001d012929,Zm00001d029722,Novel01139,Zm00001d023840,Zm00001d026097,Novel01815,Zm00001d035629,Novel01087
GO:0030154	cell differentiation	biological_process	0.34321	1	3	783	72	26932	1	Zm00001d053926	2	Zm00001d053895,Novel01469
GO:0010498	proteasomal protein catabolic process	biological_process	0.34373	1	2	783	42	26932	0		2	Zm00001d050944,Novel01090
GO:0043161	proteasome-mediated ubiquitin-dependent protein catabolic process	biological_process	0.34373	1	2	783	42	26932	0		2	Zm00001d050944,Novel01090
GO:0019028	viral capsid	cellular_component	0.34574	1	3	783	70	26932	3	Zm00001d052952,Zm00001d018882,Novel00755	0
GO:0015103	inorganic anion transmembrane transporter activity	molecular_function	0.34673	1	2	783	45	26932	0		2	Zm00001d028164,Zm00001d000204
GO:0016209	antioxidant activity	molecular_function	0.34716	1	9	783	251	26932	5	Zm00001d024752,Zm00001d054044,Zm00001d016802,Zm00001d040705,Zm00001d030685	4	Zm00001d043543,Zm00001d026154,Zm00001d009373,Zm00001d053839
GO:0004559	alpha-mannosidase activity	molecular_function	0.34902	1	1	783	16	26932	0		1	Zm00001d032090
GO:0010948	negative regulation of cell cycle process	biological_process	0.35077	1	1	783	15	26932	0		1	Zm00001d050944
GO:0016272	prefoldin complex	cellular_component	0.35181	1	1	783	14	26932	0		1	Zm00001d016159
GO:0045430	chalcone isomerase activity	molecular_function	0.35314	1	1	783	16	26932	0		1	Zm00001d012972
GO:0009135	purine nucleoside diphosphate metabolic process	biological_process	0.35326	1	4	783	102	26932	2	Zm00001d024138,Zm00001d010375	2	Zm00001d036206,Zm00001d040084
GO:0009179	purine ribonucleoside diphosphate metabolic process	biological_process	0.35326	1	4	783	102	26932	2	Zm00001d024138,Zm00001d010375	2	Zm00001d036206,Zm00001d040084
GO:0009185	ribonucleoside diphosphate metabolic process	biological_process	0.35326	1	4	783	102	26932	2	Zm00001d010375,Zm00001d024138	2	Zm00001d040084,Zm00001d036206
GO:0009161	ribonucleoside monophosphate metabolic process	biological_process	0.35358	1	8	783	228	26932	3	Zm00001d026685,Zm00001d010375,Zm00001d024138	5	Zm00001d036206,Zm00001d040084,Novel00848,Novel00789,Zm00001d014772
GO:0006725	cellular aromatic compound metabolic process	biological_process	0.35602	1	127	783	4308	26932	62	Novel00029,Zm00001d013489,Zm00001d036364,Zm00001d043025,Zm00001d039451,Zm00001d024768,Zm00001d028083,Zm00001d002483,Zm00001d037860,Zm00001d024138,Zm00001d034920,Zm00001d015226,Zm00001d050247,Zm00001d008203,Zm00001d052952,Zm00001d047523,Zm00001d002358,Zm00001d029940,Novel01047,Zm00001d017720,Zm00001d021962,Zm00001d017462,Zm00001d009939,Zm00001d048561,Novel01160,Zm00001d049743,Zm00001d019475,Zm0000…	65	Zm00001d039077,Zm00001d040084,Zm00001d017477,Novel01406,Zm00001d027925,Zm00001d015212,Zm00001d001838,Zm00001d044321,Zm00001d015008,Zm00001d026277,Zm00001d028984,Zm00001d006835,Zm00001d026182,Zm00001d032144,Zm00001d016298,Zm00001d012128,Zm00001d034160,Zm00001d022526,Zm00001d026096,Zm00001d026421,Zm00001d026392,Zm00001d051608,Zm00001d051634,Zm00001d034461,Novel01032,Zm00001d049541,Zm00001d008817,No…
GO:0032259	methylation	biological_process	0.3569	1	17	783	526	26932	9	Zm00001d009084,Zm00001d044765,Zm00001d029359,Zm00001d037860,Zm00001d027451,Zm00001d047192,Zm00001d048087,Zm00001d013644,Zm00001d020437	8	Zm00001d049179,Zm00001d044120,Zm00001d043734,Zm00001d049541,Zm00001d004109,Zm00001d013035,Zm00001d032703,Zm00001d049966
GO:0006066	alcohol metabolic process	biological_process	0.35699	1	3	783	74	26932	0		3	Zm00001d025545,Zm00001d033907,Zm00001d014292
GO:0046939	nucleotide phosphorylation	biological_process	0.35884	1	5	783	134	26932	2	Zm00001d010375,Zm00001d024138	3	Zm00001d040084,Zm00001d035916,Zm00001d036206
GO:0009628	response to abiotic stimulus	biological_process	0.36022	1	10	783	304	26932	4	Zm00001d001960,Zm00001d043325,Zm00001d017130,Novel01559	6	Zm00001d015212,Zm00001d014568,Zm00001d012929,Zm00001d046625,Zm00001d026139,Zm00001d008974
GO:0009416	response to light stimulus	biological_process	0.36108	1	4	783	109	26932	3	Zm00001d043325,Novel01559,Zm00001d001960	1	Zm00001d014568
GO:0006544	glycine metabolic process	biological_process	0.36117	1	1	783	15	26932	0		1	Zm00001d023437
GO:0031397	negative regulation of protein ubiquitination	biological_process	0.36188	1	1	783	15	26932	0		1	Zm00001d050944
GO:0051352	negative regulation of ligase activity	biological_process	0.36188	1	1	783	15	26932	0		1	Zm00001d050944
GO:0051444	negative regulation of ubiquitin-protein transferase activity	biological_process	0.36188	1	1	783	15	26932	0		1	Zm00001d050944
GO:1903321	negative regulation of protein modification by small protein conjugation or removal	biological_process	0.36188	1	1	783	15	26932	0		1	Zm00001d050944
GO:1904667	negative regulation of ubiquitin protein ligase activity	biological_process	0.36188	1	1	783	15	26932	0		1	Zm00001d050944
GO:0048646	anatomical structure formation involved in morphogenesis	biological_process	0.36212	1	2	783	44	26932	0		2	Novel01469,Zm00001d053895
GO:0042364	water-soluble vitamin biosynthetic process	biological_process	0.36215	1	2	783	43	26932	1	Zm00001d016963	1	Zm00001d012707
GO:0019104	DNA N-glycosylase activity	molecular_function	0.36231	1	1	783	15	26932	0		1	Zm00001d016801
GO:0004970	ionotropic glutamate receptor activity	molecular_function	0.36296	1	1	783	18	26932	1	Zm00001d018332	0
GO:0005230	extracellular ligand-gated ion channel activity	molecular_function	0.36296	1	1	783	18	26932	1	Zm00001d018332	0
GO:0007215	glutamate receptor signaling pathway	biological_process	0.36296	1	1	783	18	26932	1	Zm00001d018332	0
GO:0008066	glutamate receptor activity	molecular_function	0.36296	1	1	783	18	26932	1	Zm00001d018332	0
GO:0035235	ionotropic glutamate receptor signaling pathway	biological_process	0.36296	1	1	783	18	26932	1	Zm00001d018332	0
GO:0015298	solute:cation antiporter activity	molecular_function	0.36428	1	2	783	48	26932	2	Zm00001d041308,Zm00001d021461	0
GO:0015299	solute:proton antiporter activity	molecular_function	0.36428	1	2	783	48	26932	2	Zm00001d021461,Zm00001d041308	0
GO:0004252	serine-type endopeptidase activity	molecular_function	0.36458	1	5	783	142	26932	3	Novel00755,Zm00001d002678,Zm00001d047634	2	Zm00001d021231,Zm00001d021283
GO:0044712	single-organism catabolic process	biological_process	0.36532	1	15	783	455	26932	7	Zm00001d040705,Zm00001d010375,Zm00001d054044,Zm00001d024752,Zm00001d051166,Zm00001d024138,Zm00001d031813	8	Zm00001d009373,Zm00001d036206,Zm00001d023437,Zm00001d040084,Zm00001d050944,Zm00001d051194,Novel01090,Zm00001d031934
GO:0009123	nucleoside monophosphate metabolic process	biological_process	0.36575	1	8	783	231	26932	3	Zm00001d010375,Zm00001d026685,Zm00001d024138	5	Zm00001d036206,Zm00001d040084,Novel00789,Zm00001d014772,Novel00848
GO:0008094	DNA-dependent ATPase activity	molecular_function	0.36617	1	2	783	47	26932	1	Zm00001d017720	1	Zm00001d015212
GO:0006979	response to oxidative stress	biological_process	0.3671	1	9	783	256	26932	5	Zm00001d024752,Zm00001d054044,Zm00001d016802,Zm00001d030685,Zm00001d040705	4	Zm00001d012929,Zm00001d026154,Zm00001d009373,Zm00001d053839
GO:0048645	organ formation	biological_process	0.36712	1	1	783	16	26932	0		1	Zm00001d053895
GO:0009225	nucleotide-sugar metabolic process	biological_process	0.36877	1	1	783	16	26932	0		1	Zm00001d015008
GO:0005753	mitochondrial proton-transporting ATP synthase complex	cellular_component	0.36889	1	1	783	15	26932	0		1	Zm00001d015431
GO:0004003	ATP-dependent DNA helicase activity	molecular_function	0.37037	1	1	783	18	26932	0		1	Zm00001d015212
GO:0009705	plant-type vacuole membrane	cellular_component	0.37049	1	1	783	16	26932	0		1	Zm00001d051362
GO:0006465	signal peptide processing	biological_process	0.37221	1	1	783	16	26932	0		1	Zm00001d051850
GO:0008643	carbohydrate transport	biological_process	0.37239	1	4	783	103	26932	1	Zm00001d016280	3	Zm00001d010440,Zm00001d023673,Zm00001d041067
GO:0051087	chaperone binding	molecular_function	0.37351	1	2	783	43	26932	1	Zm00001d017187	1	Novel01815
GO:0031977	thylakoid lumen	cellular_component	0.37363	1	1	783	15	26932	1	Zm00001d054015	0
GO:0015979	photosynthesis	biological_process	0.37449	1	6	783	164	26932	3	Zm00001d017751,Novel01160,Novel00001	3	Zm00001d013013,Zm00001d010321,Novel01204
GO:0043547	positive regulation of GTPase activity	biological_process	0.37504	1	3	783	81	26932	1	Zm00001d007340	2	Zm00001d021087,Zm00001d017755
GO:0000075	cell cycle checkpoint	biological_process	0.37573	1	1	783	16	26932	0		1	Zm00001d050944
GO:0009637	response to blue light	biological_process	0.37624	1	1	783	17	26932	1	Zm00001d043325	0
GO:0016832	aldehyde-lyase activity	molecular_function	0.37708	1	1	783	16	26932	0		1	Zm00001d040084
GO:0003729	mRNA binding	molecular_function	0.37795	1	2	783	47	26932	2	Zm00001d047581,Zm00001d002490	0
GO:0044822	poly(A) RNA binding	molecular_function	0.37795	1	2	783	47	26932	2	Zm00001d002490,Zm00001d047581	0
GO:0051537	2 iron, 2 sulfur cluster binding	molecular_function	0.37832	1	2	783	45	26932	0		2	Zm00001d038291,Zm00001d016619
GO:0050789	regulation of biological process	biological_process	0.37835	1	101	783	3353	26932	50	Zm00001d016786,Novel01047,Zm00001d029940,Zm00001d047523,Novel01296,Zm00001d009939,Zm00001d017462,Zm00001d028165,Zm00001d049743,Zm00001d043663,Zm00001d017130,Novel01202,Zm00001d014628,Zm00001d022437,Zm00001d018332,Zm00001d052564,Zm00001d026360,Zm00001d019475,Zm00001d012335,Novel01309,Zm00001d024768,Zm00001d043025,Zm00001d036364,Zm00001d015747,Zm00001d026300,Zm00001d015226,Zm00001d034920,Zm00001d05…	51	Zm00001d042867,Novel01812,Zm00001d008817,Novel01090,Novel01469,Novel01032,Zm00001d021268,Zm00001d039506,Zm00001d050944,Zm00001d017755,Zm00001d001838,Zm00001d053446,Zm00001d027925,Zm00001d017477,Novel01406,Zm00001d039077,Zm00001d006835,Zm00001d052034,Zm00001d028984,Zm00001d034160,Zm00001d012128,Zm00001d016298,Zm00001d023873,Zm00001d032144,Zm00001d026182,Zm00001d026096,Zm00001d022526,Zm00001d008190…
GO:0016741	transferase activity, transferring one-carbon groups	molecular_function	0.37913	1	17	783	532	26932	9	Zm00001d044765,Zm00001d009084,Zm00001d027451,Zm00001d037860,Zm00001d029359,Zm00001d020437,Zm00001d013644,Zm00001d047192,Zm00001d048087	8	Zm00001d044120,Zm00001d049179,Zm00001d004109,Zm00001d049541,Zm00001d043734,Zm00001d013035,Zm00001d049966,Zm00001d032703
GO:0006631	fatty acid metabolic process	biological_process	0.37957	1	5	783	138	26932	4	Zm00001d005430,Zm00001d031449,Zm00001d016438,Zm00001d008623	1	Zm00001d025170
GO:0009074	aromatic amino acid family catabolic process	biological_process	0.38003	1	1	783	16	26932	1	Zm00001d051166	0
GO:0019856	pyrimidine nucleobase biosynthetic process	biological_process	0.3802	1	1	783	16	26932	0		1	Zm00001d035916
GO:0043647	inositol phosphate metabolic process	biological_process	0.38101	1	1	783	16	26932	0		1	Zm00001d033907
GO:0009199	ribonucleoside triphosphate metabolic process	biological_process	0.38272	1	7	783	202	26932	2	Zm00001d024138,Zm00001d010375	5	Novel00848,Novel00789,Zm00001d036206,Zm00001d014772,Zm00001d040084
GO:0098660	inorganic ion transmembrane transport	biological_process	0.38289	1	10	783	314	26932	2	Zm00001d021461,Zm00001d041308	8	Zm00001d051055,Zm00001d016619,Zm00001d028164,Zm00001d000204,Zm00001d017249,Zm00001d053446,Zm00001d033067,Zm00001d033446
GO:0098813	nuclear chromosome segregation	biological_process	0.38397	1	2	783	48	26932	0		2	Novel01090,Zm00001d050944
GO:0051606	detection of stimulus	biological_process	0.38445	1	1	783	18	26932	1	Novel01559	0
GO:0006400	tRNA modification	biological_process	0.3846	1	2	783	47	26932	1	Zm00001d037860	1	Zm00001d051608
GO:0008175	tRNA methyltransferase activity	molecular_function	0.38487	1	1	783	17	26932	1	Zm00001d037860	0
GO:0030162	regulation of proteolysis	biological_process	0.38504	1	4	783	103	26932	1	Zm00001d037969	3	Zm00001d050944,Zm00001d042867,Novel01090
GO:0016836	hydro-lyase activity	molecular_function	0.38597	1	3	783	76	26932	2	Zm00001d025333,Zm00001d048561	1	Zm00001d034461
GO:0008154	actin polymerization or depolymerization	biological_process	0.38629	1	2	783	44	26932	0		2	Novel01812,Zm00001d035629
GO:0098655	cation transmembrane transport	biological_process	0.38632	1	10	783	314	26932	2	Zm00001d041308,Zm00001d021461	8	Zm00001d053446,Zm00001d033067,Zm00001d033446,Zm00001d040627,Zm00001d017249,Zm00001d008974,Zm00001d051055,Zm00001d016619
GO:0000079	regulation of cyclin-dependent protein serine/threonine kinase activity	biological_process	0.38642	1	1	783	16	26932	1	Zm00001d026360	0
GO:1904029	regulation of cyclin-dependent protein kinase activity	biological_process	0.38642	1	1	783	16	26932	1	Zm00001d026360	0
GO:0010564	regulation of cell cycle process	biological_process	0.38767	1	2	783	46	26932	0		2	Novel01090,Zm00001d050944
GO:0019139	cytokinin dehydrogenase activity	molecular_function	0.38834	1	1	783	16	26932	1	Zm00001d032046	0
GO:0043087	regulation of GTPase activity	biological_process	0.38959	1	3	783	83	26932	1	Zm00001d007340	2	Zm00001d021087,Zm00001d017755
GO:0006890	retrograde vesicle-mediated transport, Golgi to ER	biological_process	0.39008	1	1	783	17	26932	0		1	Zm00001d016183
GO:0051082	unfolded protein binding	molecular_function	0.39059	1	5	783	139	26932	2	Zm00001d016714,Zm00001d052809	3	Zm00001d015221,Zm00001d029722,Zm00001d016159
GO:0032040	small-subunit processome	cellular_component	0.39145	1	1	783	17	26932	1	Zm00001d002483	0
GO:0030488	tRNA methylation	biological_process	0.3925	1	1	783	17	26932	1	Zm00001d037860	0
GO:0016884	carbon-nitrogen ligase activity, with glutamine as amido-N-donor	molecular_function	0.39497	1	1	783	18	26932	1	Zm00001d026685	0
GO:0008092	cytoskeletal protein binding	molecular_function	0.3951	1	8	783	262	26932	3	Zm00001d002937,Zm00001d029390,Zm00001d014376	5	Zm00001d035629,Novel01812,Zm00001d013276,Zm00001d023840,Zm00001d045759
GO:0016620	oxidoreductase activity, acting on the aldehyde or oxo group of donors, NAD or NADP as acceptor	molecular_function	0.39519	1	2	783	47	26932	1	Zm00001d017418	1	Zm00001d019850
GO:0006767	water-soluble vitamin metabolic process	biological_process	0.39529	1	2	783	46	26932	1	Zm00001d016963	1	Zm00001d012707
GO:0006165	nucleoside diphosphate phosphorylation	biological_process	0.39548	1	4	783	108	26932	2	Zm00001d010375,Zm00001d024138	2	Zm00001d040084,Zm00001d036206
GO:0004888	transmembrane signaling receptor activity	molecular_function	0.39618	1	1	783	20	26932	1	Zm00001d018332	0
GO:0008276	protein methyltransferase activity	molecular_function	0.39638	1	2	783	49	26932	1	Zm00001d020437	1	Zm00001d049966
GO:0009886	post-embryonic morphogenesis	biological_process	0.39683	1	1	783	18	26932	0		1	Zm00001d053895
GO:0012501	programmed cell death	biological_process	0.39756	1	1	783	17	26932	1	Novel01047	0
GO:0005975	carbohydrate metabolic process	biological_process	0.39764	1	35	783	1150	26932	10	Zm00001d014945,Zm00001d011886,Zm00001d049028,Zm00001d025288,Zm00001d015129,Zm00001d025943,Zm00001d024138,Zm00001d010375,Zm00001d012335,Zm00001d009936	25	Zm00001d015783,Zm00001d017416,Zm00001d024037,Zm00001d014772,Zm00001d019479,Zm00001d032992,Zm00001d003817,Zm00001d033649,Zm00001d034074,Zm00001d045261,Zm00001d024071,Zm00001d012159,Zm00001d009876,Zm00001d013573,Zm00001d046127,Zm00001d044566,Zm00001d046134,Zm00001d013052,Zm00001d025354,Zm00001d036206,Zm00001d040084,Zm00001d014292,Zm00001d021050,Zm00001d035899,Zm00001d032090
GO:0009141	nucleoside triphosphate metabolic process	biological_process	0.39784	1	7	783	205	26932	2	Zm00001d024138,Zm00001d010375	5	Novel00848,Novel00789,Zm00001d036206,Zm00001d014772,Zm00001d040084
GO:0005096	GTPase activator activity	molecular_function	0.39886	1	2	783	49	26932	1	Zm00001d007340	1	Zm00001d021087
GO:0044264	cellular polysaccharide metabolic process	biological_process	0.39954	1	7	783	216	26932	0		7	Zm00001d045261,Zm00001d012159,Zm00001d024071,Zm00001d003817,Zm00001d046127,Zm00001d044566,Zm00001d019479
GO:0051765	inositol tetrakisphosphate kinase activity	molecular_function	0.40037	1	1	783	17	26932	0		1	Zm00001d033907
GO:0009314	response to radiation	biological_process	0.40039	1	4	783	116	26932	3	Zm00001d043325,Novel01559,Zm00001d001960	1	Zm00001d014568
GO:0016899	oxidoreductase activity, acting on the CH-OH group of donors, oxygen as acceptor	molecular_function	0.40134	1	1	783	17	26932	1	Zm00001d051130	0
GO:0009059	macromolecule biosynthetic process	biological_process	0.40279	1	106	783	3525	26932	51	Zm00001d014885,Zm00001d041886,Zm00001d033181,Zm00001d007092,Zm00001d048991,Zm00001d015037,Zm00001d016457,Zm00001d027530,Zm00001d011596,Zm00001d015204,Zm00001d019734,Zm00001d003411,Zm00001d037607,Zm00001d026305,Zm00001d020711,Zm00001d027919,Zm00001d038023,Zm00001d013151,Novel01559,Zm00001d027271,Zm00001d043325,Zm00001d036129,Zm00001d009619,Zm00001d039531,Zm00001d034724,Zm00001d043094,Zm00001d01809…	55	Zm00001d046947,Zm00001d041389,Zm00001d014568,Zm00001d046751,Zm00001d044857,Novel00972,Zm00001d039032,Zm00001d013052,Zm00001d013126,Zm00001d027431,Zm00001d012413,Zm00001d008190,Zm00001d016277,Novel01548,Zm00001d045320,Novel00326,Zm00001d015917,Zm00001d051480,Zm00001d031241,Zm00001d042463,Novel01082,Zm00001d010634,Zm00001d028603,Zm00001d041453,Zm00001d003817,Zm00001d015212,Zm00001d001838,Zm00001d03…
GO:0009110	vitamin biosynthetic process	biological_process	0.40321	1	2	783	47	26932	1	Zm00001d016963	1	Zm00001d012707
GO:0019901	protein kinase binding	molecular_function	0.40372	1	1	783	18	26932	1	Zm00001d026360	0
GO:0000162	tryptophan biosynthetic process	biological_process	0.4038	1	1	783	17	26932	0		1	Zm00001d034461
GO:0046219	indolalkylamine biosynthetic process	biological_process	0.4038	1	1	783	17	26932	0		1	Zm00001d034461
GO:0019439	aromatic compound catabolic process	biological_process	0.40903	1	4	783	113	26932	1	Zm00001d051166	3	Zm00001d031934,Zm00001d026392,Zm00001d015372
GO:0006461	protein complex assembly	biological_process	0.40976	1	7	783	208	26932	5	Zm00001d034479,Zm00001d021422,Zm00001d017751,Zm00001d052902,Zm00001d038851	2	Novel01469,Novel01812
GO:0070271	protein complex biogenesis	biological_process	0.40976	1	7	783	208	26932	5	Zm00001d038851,Zm00001d034479,Zm00001d021422,Zm00001d017751,Zm00001d052902	2	Novel01469,Novel01812
GO:0034637	cellular carbohydrate biosynthetic process	biological_process	0.4103	1	6	783	189	26932	0		6	Zm00001d045261,Zm00001d014292,Zm00001d003817,Zm00001d044566,Zm00001d046127,Zm00001d019479
GO:0008641	small protein activating enzyme activity	molecular_function	0.41094	1	1	783	20	26932	0		1	Zm00001d051608
GO:0003746	translation elongation factor activity	molecular_function	0.41279	1	3	783	80	26932	2	Zm00001d006596,Zm00001d007092	1	Zm00001d045320
GO:0006206	pyrimidine nucleobase metabolic process	biological_process	0.41282	1	1	783	18	26932	0		1	Zm00001d035916
GO:0000178	exosome (RNase complex)	cellular_component	0.41421	1	1	783	18	26932	1	Zm00001d042888	0
GO:0032446	protein modification by small protein conjugation	biological_process	0.4145	1	7	783	218	26932	4	Zm00001d023480,Zm00001d024672,Zm00001d029847,Zm00001d044734	3	Zm00001d050944,Zm00001d053897,Zm00001d050712
GO:0005977	glycogen metabolic process	biological_process	0.4155	1	1	783	19	26932	0		1	Zm00001d003817
GO:0006112	energy reserve metabolic process	biological_process	0.4155	1	1	783	19	26932	0		1	Zm00001d003817
GO:0006525	arginine metabolic process	biological_process	0.41722	1	1	783	18	26932	0		1	Zm00001d051194
GO:0015923	mannosidase activity	molecular_function	0.41733	1	1	783	20	26932	0		1	Zm00001d032090
GO:0015077	monovalent inorganic cation transmembrane transporter activity	molecular_function	0.418	1	8	783	253	26932	2	Zm00001d041308,Zm00001d021461	6	Zm00001d053446,Zm00001d033067,Zm00001d017249,Zm00001d051055,Zm00001d016619,Novel01064
GO:0042255	ribosome assembly	biological_process	0.41843	1	1	783	18	26932	1	Zm00001d027919	0
GO:0051766	inositol trisphosphate kinase activity	molecular_function	0.41886	1	1	783	18	26932	0		1	Zm00001d033907
GO:0016747	transferase activity, transferring acyl groups other than amino-acyl groups	molecular_function	0.41927	1	12	783	371	26932	8	Zm00001d024763,Zm00001d012333,Zm00001d034417,Zm00001d008756,Zm00001d016438,Zm00001d032527,Zm00001d005430,Zm00001d035246	4	Zm00001d021073,Zm00001d031212,Zm00001d004109,Zm00001d031685
GO:0019900	kinase binding	molecular_function	0.41953	1	1	783	19	26932	1	Zm00001d026360	0
GO:0015276	ligand-gated ion channel activity	molecular_function	0.41983	1	1	783	21	26932	1	Zm00001d018332	0
GO:0022834	ligand-gated channel activity	molecular_function	0.41983	1	1	783	21	26932	1	Zm00001d018332	0
GO:0016774	phosphotransferase activity, carboxyl group as acceptor	molecular_function	0.42009	1	1	783	19	26932	1	Zm00001d024138	0
GO:0019012	virion	cellular_component	0.42123	1	3	783	80	26932	3	Zm00001d052952,Zm00001d018882,Novel00755	0
GO:0044423	virion part	cellular_component	0.42123	1	3	783	80	26932	3	Zm00001d052952,Zm00001d018882,Novel00755	0
GO:0009751	response to salicylic acid	biological_process	0.42203	1	1	783	19	26932	1	Zm00001d028165	0
GO:0055085	transmembrane transport	biological_process	0.42266	1	32	783	1075	26932	6	Zm00001d026156,Zm00001d000196,Zm00001d009705,Zm00001d041308,Zm00001d021461,Zm00001d042692	26	Zm00001d006697,Zm00001d040627,Zm00001d024842,Zm00001d028164,Zm00001d025894,Zm00001d053446,Zm00001d021629,Zm00001d021938,Zm00001d016794,Zm00001d042345,Zm00001d008974,Zm00001d033493,Zm00001d033067,Zm00001d017249,Zm00001d051055,Zm00001d016619,Zm00001d037492,Zm00001d013652,Zm00001d028311,Zm00001d033446,Zm00001d020488,Zm00001d000195,Zm00001d000204,Zm00001d045567,Zm00001d016299,Zm00001d045572
GO:0000724	double-strand break repair via homologous recombination	biological_process	0.42319	1	1	783	21	26932	0		1	Zm00001d015212
GO:0009396	folic acid-containing compound biosynthetic process	biological_process	0.42409	1	1	783	19	26932	1	Zm00001d026531	0
GO:0016638	oxidoreductase activity, acting on the CH-NH2 group of donors	molecular_function	0.42732	1	1	783	21	26932	0		1	Zm00001d023437
GO:0051258	protein polymerization	biological_process	0.4291	1	2	783	50	26932	0		2	Novel01469,Novel01812
GO:0000398	mRNA splicing, via spliceosome	biological_process	0.43028	1	3	783	83	26932	2	Novel00029,Zm00001d017751	1	Zm00001d026392
GO:0016628	oxidoreductase activity, acting on the CH-CH group of donors, NAD or NADP as acceptor	molecular_function	0.43122	1	1	783	19	26932	0		1	Zm00001d001820
GO:0016667	oxidoreductase activity, acting on a sulfur group of donors	molecular_function	0.43193	1	5	783	144	26932	1	Zm00001d051851	4	Zm00001d023873,Zm00001d023869,Zm00001d052769,Zm00001d052034
GO:0019216	regulation of lipid metabolic process	biological_process	0.43274	1	1	783	19	26932	1	Zm00001d016714	0
GO:0051345	positive regulation of hydrolase activity	biological_process	0.43278	1	3	783	88	26932	1	Zm00001d007340	2	Zm00001d021087,Zm00001d017755
GO:0019205	nucleobase-containing compound kinase activity	molecular_function	0.43473	1	2	783	50	26932	0		2	Zm00001d035916,Zm00001d041814
GO:0038023	signaling receptor activity	molecular_function	0.43518	1	2	783	59	26932	2	Zm00001d018332,Novel01047	0
GO:0006766	vitamin metabolic process	biological_process	0.43532	1	2	783	50	26932	1	Zm00001d016963	1	Zm00001d012707
GO:0000725	recombinational repair	biological_process	0.43585	1	1	783	22	26932	0		1	Zm00001d015212
GO:0006595	polyamine metabolic process	biological_process	0.43589	1	1	783	19	26932	0		1	Zm00001d051194
GO:0006596	polyamine biosynthetic process	biological_process	0.43589	1	1	783	19	26932	0		1	Zm00001d051194
GO:0006787	porphyrin-containing compound catabolic process	biological_process	0.43632	1	1	783	19	26932	0		1	Zm00001d031934
GO:0033015	tetrapyrrole catabolic process	biological_process	0.43632	1	1	783	19	26932	0		1	Zm00001d031934
GO:0051187	cofactor catabolic process	biological_process	0.43632	1	1	783	19	26932	0		1	Zm00001d031934
GO:0005249	voltage-gated potassium channel activity	molecular_function	0.43707	1	1	783	21	26932	0		1	Zm00001d053446
GO:0009132	nucleoside diphosphate metabolic process	biological_process	0.43768	1	4	783	115	26932	2	Zm00001d010375,Zm00001d024138	2	Zm00001d040084,Zm00001d036206
GO:0032504	multicellular organism reproduction	biological_process	0.43804	1	1	783	20	26932	0		1	Novel01469
GO:0048609	multicellular organismal reproductive process	biological_process	0.43804	1	1	783	20	26932	0		1	Novel01469
GO:0042277	peptide binding	molecular_function	0.43812	1	1	783	19	26932	1	Zm00001d024839	0
GO:0033043	regulation of organelle organization	biological_process	0.4382	1	3	783	84	26932	0		3	Novel01090,Novel01812,Zm00001d050944
GO:0044724	single-organism carbohydrate catabolic process	biological_process	0.43836	1	4	783	115	26932	2	Zm00001d010375,Zm00001d024138	2	Zm00001d040084,Zm00001d036206
GO:0071822	protein complex subunit organization	biological_process	0.4404	1	9	783	281	26932	5	Zm00001d017751,Zm00001d052902,Zm00001d034479,Zm00001d021422,Zm00001d038851	4	Zm00001d035629,Novel01812,Novel01469,Zm00001d037868
GO:0016651	oxidoreductase activity, acting on NAD(P)H	molecular_function	0.44139	1	3	783	84	26932	0		3	Zm00001d043619,Novel00848,Zm00001d043543
GO:0005615	extracellular space	cellular_component	0.44237	1	1	783	19	26932	0		1	Novel01469
GO:0051539	4 iron, 4 sulfur cluster binding	molecular_function	0.44333	1	2	783	53	26932	1	Zm00001d016866	1	Zm00001d043619
GO:0005088	Ras guanyl-nucleotide exchange factor activity	molecular_function	0.44378	1	1	783	20	26932	0		1	Zm00001d017755
GO:0005089	Rho guanyl-nucleotide exchange factor activity	molecular_function	0.44378	1	1	783	20	26932	0		1	Zm00001d017755
GO:0048438	floral whorl development	biological_process	0.44427	1	1	783	20	26932	0		1	Zm00001d053895
GO:0003916	DNA topoisomerase activity	molecular_function	0.44576	1	1	783	21	26932	1	Zm00001d017720	0
GO:0006904	vesicle docking involved in exocytosis	biological_process	0.44653	1	1	783	21	26932	0		1	Zm00001d034208
GO:1901361	organic cyclic compound catabolic process	biological_process	0.44656	1	4	783	119	26932	1	Zm00001d051166	3	Zm00001d026392,Zm00001d015372,Zm00001d031934
GO:0000271	polysaccharide biosynthetic process	biological_process	0.44725	1	5	783	163	26932	0		5	Zm00001d019479,Zm00001d046127,Zm00001d003817,Zm00001d044566,Zm00001d045261
GO:0010817	regulation of hormone levels	biological_process	0.44945	1	2	783	51	26932	1	Zm00001d032046	1	Zm00001d049541
GO:0000325	plant-type vacuole	cellular_component	0.44953	1	1	783	21	26932	0		1	Zm00001d051362
GO:0097305	response to alcohol	biological_process	0.44957	1	3	783	86	26932	1	Zm00001d017130	2	Zm00001d012929,Zm00001d015212
GO:0071215	cellular response to abscisic acid stimulus	biological_process	0.44965	1	1	783	21	26932	0		1	Zm00001d015212
GO:0004540	ribonuclease activity	molecular_function	0.44989	1	2	783	54	26932	1	Zm00001d039451	1	Zm00001d022630
GO:0008380	RNA splicing	biological_process	0.4512	1	4	783	120	26932	3	Zm00001d013489,Zm00001d017751,Novel00029	1	Zm00001d026392
GO:0006732	coenzyme metabolic process	biological_process	0.45448	1	9	783	285	26932	5	Zm00001d024138,Zm00001d016866,Zm00001d026531,Novel00672,Zm00001d010375	4	Zm00001d051608,Zm00001d036206,Zm00001d040084,Zm00001d016850
GO:0008170	N-methyltransferase activity	molecular_function	0.4573	1	2	783	55	26932	2	Zm00001d020437,Zm00001d037860	0
GO:0016740	transferase activity	molecular_function	0.45742	1	146	783	5043	26932	78	Zm00001d012335,Zm00001d008756,Zm00001d032222,Zm00001d008370,Zm00001d024672,Zm00001d037860,Zm00001d012333,Zm00001d018220,Zm00001d029359,Zm00001d044806,Zm00001d020437,Zm00001d009473,Zm00001d035246,Zm00001d047801,Zm00001d024839,Zm00001d039337,Zm00001d038522,Zm00001d009084,Zm00001d015032,Zm00001d016417,Zm00001d026360,Zm00001d053876,Zm00001d016103,Zm00001d010375,Zm00001d016806,Zm00001d043344,Zm00001d0…	68	Zm00001d044120,Zm00001d002970,Zm00001d037811,Zm00001d051424,Zm00001d022557,Zm00001d015008,Zm00001d043734,Zm00001d051917,Zm00001d015444,Zm00001d044566,Zm00001d013035,Zm00001d046127,Zm00001d003522,Zm00001d049966,Zm00001d051608,Zm00001d045261,Zm00001d034074,Zm00001d051634,Novel01087,Zm00001d014674,Zm00001d031685,Zm00001d053761,Zm00001d037507,Zm00001d041814,Zm00001d021684,Zm00001d033907,Zm00001d01360…
GO:0042446	hormone biosynthetic process	biological_process	0.46019	1	1	783	20	26932	0		1	Zm00001d049541
GO:0016149	translation release factor activity, codon specific	molecular_function	0.46022	1	1	783	20	26932	0		1	Zm00001d037868
GO:0048827	phyllome development	biological_process	0.46059	1	2	783	54	26932	1	Zm00001d028165	1	Zm00001d053895
GO:0009639	response to red or far red light	biological_process	0.46162	1	1	783	23	26932	1	Zm00001d043325	0
GO:0048278	vesicle docking	biological_process	0.46204	1	1	783	22	26932	0		1	Zm00001d034208
GO:0006857	oligopeptide transport	biological_process	0.46249	1	1	783	21	26932	0		1	Zm00001d012953
GO:0015833	peptide transport	biological_process	0.46249	1	1	783	21	26932	0		1	Zm00001d012953
GO:0009808	lignin metabolic process	biological_process	0.46266	1	1	783	21	26932	0		1	Zm00001d049541
GO:0019725	cellular homeostasis	biological_process	0.46346	1	7	783	218	26932	3	Zm00001d015747,Zm00001d016786,Zm00001d051851	4	Zm00001d023869,Zm00001d052769,Zm00001d023873,Zm00001d052034
GO:0030198	extracellular matrix organization	biological_process	0.46385	1	1	783	21	26932	0		1	Zm00001d047276
GO:0043062	extracellular structure organization	biological_process	0.46385	1	1	783	21	26932	0		1	Zm00001d047276
GO:0044764	multi-organism cellular process	biological_process	0.46442	1	1	783	22	26932	0		1	Novel00972
GO:0009966	regulation of signal transduction	biological_process	0.46712	1	2	783	58	26932	2	Zm00001d043325,Zm00001d012335	0
GO:0042278	purine nucleoside metabolic process	biological_process	0.46787	1	8	783	253	26932	3	Zm00001d026685,Zm00001d010375,Zm00001d024138	5	Zm00001d040084,Zm00001d036206,Novel00848,Zm00001d014772,Novel00789
GO:0046128	purine ribonucleoside metabolic process	biological_process	0.46787	1	8	783	253	26932	3	Zm00001d024138,Zm00001d026685,Zm00001d010375	5	Novel00848,Novel00789,Zm00001d014772,Zm00001d036206,Zm00001d040084
GO:0071482	cellular response to light stimulus	biological_process	0.46964	1	1	783	24	26932	1	Zm00001d043325	0
GO:0009067	aspartate family amino acid biosynthetic process	biological_process	0.47012	1	2	783	54	26932	2	Zm00001d013644,Zm00001d028165	0
GO:0009832	plant-type cell wall biogenesis	biological_process	0.47128	1	1	783	22	26932	0		1	Zm00001d047276
GO:0048046	apoplast	cellular_component	0.47194	1	4	783	117	26932	1	Zm00001d011069	3	Zm00001d004758,Zm00001d004753,Zm00001d024071
GO:0044421	extracellular region part	cellular_component	0.47215	1	1	783	21	26932	0		1	Novel01469
GO:0008283	cell proliferation	biological_process	0.47341	1	1	783	22	26932	1	Novel01047	0
GO:0017004	cytochrome complex assembly	biological_process	0.47681	1	1	783	21	26932	1	Zm00001d052902	0
GO:0023051	regulation of signaling	biological_process	0.47726	1	2	783	59	26932	2	Zm00001d012335,Zm00001d043325	0
GO:0009733	response to auxin	biological_process	0.47726	1	7	783	223	26932	3	Zm00001d013619,Zm00001d033463,Zm00001d033462	4	Zm00001d042345,Zm00001d025947,Zm00001d052148,Zm00001d016277
GO:0003690	double-stranded DNA binding	molecular_function	0.47813	1	2	783	58	26932	2	Zm00001d017130,Zm00001d049743	0
GO:0006553	lysine metabolic process	biological_process	0.48	1	1	783	22	26932	1	Zm00001d028165	0
GO:0009085	lysine biosynthetic process	biological_process	0.48	1	1	783	22	26932	1	Zm00001d028165	0
GO:0009089	lysine biosynthetic process via diaminopimelate	biological_process	0.48	1	1	783	22	26932	1	Zm00001d028165	0
GO:0046451	diaminopimelate metabolic process	biological_process	0.48	1	1	783	22	26932	1	Zm00001d028165	0
GO:0006839	mitochondrial transport	biological_process	0.48116	1	1	783	22	26932	0		1	Zm00001d048583
GO:0043531	ADP binding	molecular_function	0.48254	1	4	783	144	26932	3	Zm00001d021176,Zm00001d014649,Zm00001d048635	1	Zm00001d034555
GO:0006265	DNA topological change	biological_process	0.48254	1	1	783	24	26932	1	Zm00001d017720	0
GO:0000375	RNA splicing, via transesterification reactions	biological_process	0.48268	1	3	783	91	26932	2	Zm00001d017751,Novel00029	1	Zm00001d026392
GO:0000377	RNA splicing, via transesterification reactions with bulged adenosine as nucleophile	biological_process	0.48268	1	3	783	91	26932	2	Zm00001d017751,Novel00029	1	Zm00001d026392
GO:0022843	voltage-gated cation channel activity	molecular_function	0.483	1	1	783	24	26932	0		1	Zm00001d053446
GO:0009611	response to wounding	biological_process	0.48504	1	2	783	53	26932	1	Zm00001d037969	1	Novel01469
GO:0051704	multi-organism process	biological_process	0.48505	1	9	783	302	26932	4	Zm00001d011069,Zm00001d048950,Zm00001d048949,Zm00001d028165	5	Zm00001d019225,Zm00001d026139,Novel01469,Novel00972,Zm00001d043252
GO:0046700	heterocycle catabolic process	biological_process	0.48573	1	3	783	91	26932	0		3	Zm00001d015372,Zm00001d026392,Zm00001d031934
GO:0044270	cellular nitrogen compound catabolic process	biological_process	0.48629	1	3	783	91	26932	0		3	Zm00001d031934,Zm00001d015372,Zm00001d026392
GO:0004872	receptor activity	molecular_function	0.48638	1	2	783	64	26932	2	Novel01047,Zm00001d018332	0
GO:0090558	plant epidermis development	biological_process	0.48639	1	1	783	23	26932	1	Zm00001d053926	0
GO:0007059	chromosome segregation	biological_process	0.4868	1	2	783	59	26932	0		2	Zm00001d050944,Novel01090
GO:0010646	regulation of cell communication	biological_process	0.48727	1	2	783	60	26932	2	Zm00001d012335,Zm00001d043325	0
GO:0042559	pteridine-containing compound biosynthetic process	biological_process	0.48739	1	1	783	23	26932	1	Zm00001d026531	0
GO:0000148	1,3-beta-D-glucan synthase complex	cellular_component	0.4878	1	1	783	26	26932	0		1	Zm00001d044566
GO:0003843	1,3-beta-D-glucan synthase activity	molecular_function	0.4878	1	1	783	26	26932	0		1	Zm00001d044566
GO:0006074	(1->3)-beta-D-glucan metabolic process	biological_process	0.4878	1	1	783	26	26932	0		1	Zm00001d044566
GO:0006075	(1->3)-beta-D-glucan biosynthetic process	biological_process	0.4878	1	1	783	26	26932	0		1	Zm00001d044566
GO:0030684	preribosome	cellular_component	0.48858	1	1	783	23	26932	1	Zm00001d002483	0
GO:0006563	L-serine metabolic process	biological_process	0.48885	1	1	783	22	26932	1	Zm00001d046923	0
GO:0022626	cytosolic ribosome	cellular_component	0.48892	1	1	783	22	26932	1	Zm00001d027919	0
GO:0031225	anchored component of membrane	cellular_component	0.48958	1	1	783	22	26932	0		1	Zm00001d047276
GO:0034655	nucleobase-containing compound catabolic process	biological_process	0.49027	1	2	783	58	26932	0		2	Zm00001d015372,Zm00001d026392
GO:0000956	nuclear-transcribed mRNA catabolic process	biological_process	0.49178	1	1	783	24	26932	0		1	Zm00001d026392
GO:0042802	identical protein binding	molecular_function	0.49192	1	2	783	58	26932	2	Zm00001d017187,Zm00001d024839	0
GO:0004650	polygalacturonase activity	molecular_function	0.49416	1	2	783	55	26932	1	Zm00001d015129	1	Zm00001d035899
GO:0009086	methionine biosynthetic process	biological_process	0.49531	1	1	783	23	26932	1	Zm00001d013644	0
GO:0009505	plant-type cell wall	cellular_component	0.49533	1	1	783	23	26932	1	Zm00001d028338	0
GO:0048038	quinone binding	molecular_function	0.5006	1	1	783	23	26932	0		1	Zm00001d043619
GO:0009150	purine ribonucleotide metabolic process	biological_process	0.50103	1	8	783	261	26932	3	Zm00001d024138,Zm00001d010375,Zm00001d026685	5	Zm00001d014772,Novel00789,Novel00848,Zm00001d040084,Zm00001d036206
GO:0008017	microtubule binding	molecular_function	0.50128	1	4	783	139	26932	2	Zm00001d002937,Zm00001d029390	2	Zm00001d045759,Zm00001d023840
GO:0009887	organ morphogenesis	biological_process	0.50162	1	1	783	25	26932	0		1	Zm00001d053895
GO:0016052	carbohydrate catabolic process	biological_process	0.50203	1	7	783	226	26932	2	Zm00001d010375,Zm00001d024138	5	Zm00001d012159,Zm00001d032992,Zm00001d017416,Zm00001d040084,Zm00001d036206
GO:0009941	chloroplast envelope	cellular_component	0.50277	1	4	783	126	26932	3	Zm00001d021245,Zm00001d016714,Zm00001d052410	1	Zm00001d014744
GO:0071478	cellular response to radiation	biological_process	0.5047	1	1	783	27	26932	1	Zm00001d043325	0
GO:0004520	endodeoxyribonuclease activity	molecular_function	0.5048	1	1	783	24	26932	0		1	Zm00001d016801
GO:0005267	potassium channel activity	molecular_function	0.50494	1	1	783	26	26932	0		1	Zm00001d053446
GO:0006760	folic acid-containing compound metabolic process	biological_process	0.50498	1	1	783	24	26932	1	Zm00001d026531	0
GO:0009678	hydrogen-translocating pyrophosphatase activity	molecular_function	0.50601	1	1	783	25	26932	0		1	Zm00001d037492
GO:0034641	cellular nitrogen compound metabolic process	biological_process	0.50603	1	148	783	5140	26932	70	Zm00001d002483,Zm00001d037860,Zm00001d052952,Zm00001d015226,Zm00001d034920,Zm00001d036364,Zm00001d024768,Zm00001d049743,Zm00001d052564,Zm00001d019475,Zm00001d022437,Zm00001d014628,Zm00001d043663,Zm00001d017130,Zm00001d047523,Zm00001d029940,Zm00001d016963,Zm00001d011596,Zm00001d027530,Zm00001d015204,Zm00001d010375,Zm00001d041886,Zm00001d048991,Zm00001d016457,Zm00001d015037,Zm00001d026531,Zm00001d0…	78	Zm00001d032144,Zm00001d024029,Zm00001d012128,Zm00001d017477,Novel01406,Zm00001d040084,Zm00001d039077,Zm00001d022557,Zm00001d015008,Zm00001d006835,Zm00001d022630,Zm00001d021268,Zm00001d031685,Zm00001d051608,Zm00001d034461,Zm00001d051634,Novel00848,Zm00001d046751,Novel00972,Zm00001d041814,Zm00001d039032,Novel00159,Zm00001d028603,Zm00001d041453,Zm00001d015372,Zm00001d027233,Zm00001d010634,Zm00001d04…
GO:0006399	tRNA metabolic process	biological_process	0.50643	1	6	783	202	26932	3	Zm00001d015037,Zm00001d021962,Zm00001d037860	3	Zm00001d051608,Zm00001d031685,Zm00001d031241
GO:0007015	actin filament organization	biological_process	0.50801	1	2	783	58	26932	0		2	Zm00001d035629,Novel01812
GO:0042886	amide transport	biological_process	0.50874	1	1	783	24	26932	0		1	Zm00001d012953
GO:0009066	aspartate family amino acid metabolic process	biological_process	0.50928	1	2	783	58	26932	2	Zm00001d013644,Zm00001d028165	0
GO:0010467	gene expression	biological_process	0.51001	1	107	783	3650	26932	57	Zm00001d002483,Zm00001d037860,Zm00001d052952,Zm00001d026300,Zm00001d050247,Zm00001d015226,Zm00001d034920,Novel00029,Zm00001d036364,Zm00001d013489,Zm00001d043025,Zm00001d024768,Zm00001d039451,Zm00001d049743,Zm00001d052564,Zm00001d019475,Zm00001d022437,Zm00001d014628,Zm00001d017130,Zm00001d043663,Novel01202,Zm00001d047523,Zm00001d005030,Zm00001d029940,Novel01047,Zm00001d021962,Zm00001d006596,Zm0000…	50	Zm00001d032144,Zm00001d026182,Zm00001d012128,Zm00001d024029,Zm00001d016298,Zm00001d034160,Zm00001d022526,Zm00001d014873,Zm00001d026096,Zm00001d026421,Zm00001d017477,Novel01406,Zm00001d039077,Zm00001d027925,Zm00001d001838,Zm00001d006835,Zm00001d028984,Zm00001d021268,Zm00001d039506,Zm00001d031685,Zm00001d026392,Zm00001d051608,Zm00001d037868,Novel01032,Novel00549,Zm00001d045876,Zm00001d008817,Zm0000…
GO:0019200	carbohydrate kinase activity	molecular_function	0.5118	1	2	783	58	26932	1	Zm00001d010375	1	Zm00001d036206
GO:0050662	coenzyme binding	molecular_function	0.51214	1	13	783	437	26932	10	Zm00001d051130,Zm00001d014919,Zm00001d030090,Zm00001d007644,Zm00001d037005,Zm00001d032046,Zm00001d016841,Zm00001d025288,Zm00001d046923,Zm00001d008427	3	Zm00001d025545,Zm00001d024518,Zm00001d017598
GO:0009116	nucleoside metabolic process	biological_process	0.51288	1	9	783	299	26932	3	Zm00001d010375,Zm00001d026685,Zm00001d024138	6	Zm00001d036206,Zm00001d040084,Zm00001d051634,Novel00789,Zm00001d014772,Novel00848
GO:1901657	glycosyl compound metabolic process	biological_process	0.51288	1	9	783	299	26932	3	Zm00001d010375,Zm00001d026685,Zm00001d024138	6	Zm00001d036206,Zm00001d040084,Zm00001d051634,Novel00789,Zm00001d014772,Novel00848
GO:0051340	regulation of ligase activity	biological_process	0.51473	1	1	783	24	26932	0		1	Zm00001d050944
GO:0051438	regulation of ubiquitin-protein transferase activity	biological_process	0.51473	1	1	783	24	26932	0		1	Zm00001d050944
GO:1904666	regulation of ubiquitin protein ligase activity	biological_process	0.51473	1	1	783	24	26932	0		1	Zm00001d050944
GO:0045861	negative regulation of proteolysis	biological_process	0.51579	1	3	783	89	26932	1	Zm00001d037969	2	Zm00001d050944,Zm00001d042867
GO:0006163	purine nucleotide metabolic process	biological_process	0.51825	1	8	783	265	26932	3	Zm00001d024138,Zm00001d010375,Zm00001d026685	5	Novel00789,Zm00001d014772,Novel00848,Zm00001d036206,Zm00001d040084
GO:0043648	dicarboxylic acid metabolic process	biological_process	0.51987	1	3	783	94	26932	1	Zm00001d028165	2	Zm00001d047981,Zm00001d003522
GO:0033993	response to lipid	biological_process	0.51999	1	3	783	96	26932	1	Zm00001d017130	2	Zm00001d012929,Zm00001d015212
GO:0016717	oxidoreductase activity, acting on paired donors, with oxidation of a pair of donors resulting in the reduction of molecular oxygen to two molecules of water	molecular_function	0.52013	1	1	783	24	26932	0		1	Zm00001d025170
GO:0031969	chloroplast membrane	cellular_component	0.52023	1	1	783	25	26932	1	Zm00001d016714	0
GO:0048437	floral organ development	biological_process	0.5248	1	1	783	26	26932	0		1	Zm00001d053895
GO:0005319	lipid transporter activity	molecular_function	0.52666	1	1	783	28	26932	0		1	Zm00001d013445
GO:0004867	serine-type endopeptidase inhibitor activity	molecular_function	0.52793	1	2	783	57	26932	1	Zm00001d037969	1	Zm00001d042867
GO:0097164	ammonium ion metabolic process	biological_process	0.52894	1	1	783	27	26932	0		1	Zm00001d051194
GO:0031396	regulation of protein ubiquitination	biological_process	0.52926	1	1	783	25	26932	0		1	Zm00001d050944
GO:1903320	regulation of protein modification by small protein conjugation or removal	biological_process	0.52926	1	1	783	25	26932	0		1	Zm00001d050944
GO:0009814	defense response, incompatible interaction	biological_process	0.52994	1	1	783	27	26932	1	Zm00001d028165	0
GO:0009266	response to temperature stimulus	biological_process	0.53056	1	3	783	97	26932	0		3	Zm00001d046625,Zm00001d012929,Zm00001d015212
GO:0009070	serine family amino acid biosynthetic process	biological_process	0.53216	1	1	783	25	26932	1	Zm00001d046923	0
GO:0051348	negative regulation of transferase activity	biological_process	0.53328	1	1	783	25	26932	0		1	Zm00001d050944
GO:0034622	cellular macromolecular complex assembly	biological_process	0.53362	1	8	783	268	26932	6	Zm00001d038851,Zm00001d027919,Zm00001d034479,Zm00001d021422,Zm00001d052902,Zm00001d017751	2	Novel01469,Novel01812
GO:0022406	membrane docking	biological_process	0.53443	1	1	783	27	26932	0		1	Zm00001d034208
GO:0043169	cation binding	molecular_function	0.53614	1	101	783	3510	26932	56	Zm00001d016963,Zm00001d041082,Zm00001d007015,Zm00001d024843,Zm00001d022234,Zm00001d014958,Zm00001d034540,Zm00001d029648,Zm00001d053926,Zm00001d015976,Zm00001d016577,Zm00001d046342,Zm00001d048451,Zm00001d048819,Zm00001d013231,Zm00001d029390,Zm00001d044156,Zm00001d021403,Zm00001d054044,Zm00001d008427,Zm00001d001960,Zm00001d002937,Zm00001d018181,Zm00001d016866,Zm00001d016697,Zm00001d042008,Zm00001d0…	45	Zm00001d010321,Zm00001d043613,Zm00001d042600,Zm00001d029722,Zm00001d033623,Zm00001d051608,Zm00001d017416,Zm00001d005630,Zm00001d016164,Zm00001d020722,Zm00001d008620,Zm00001d024200,GRMZM5G815453,Zm00001d025170,Zm00001d044120,Zm00001d035659,Zm00001d014271,Zm00001d043144,Zm00001d016691,Zm00001d039377,Zm00001d043543,Novel01885,Zm00001d047837,Zm00001d026139,Zm00001d021087,Zm00001d045320,Zm00001d003817…
GO:0019013	viral nucleocapsid	cellular_component	0.53677	1	2	783	60	26932	2	Zm00001d052952,Zm00001d018882	0
GO:0030245	cellulose catabolic process	biological_process	0.53714	1	1	783	26	26932	0		1	Zm00001d012159
GO:0051275	beta-glucan catabolic process	biological_process	0.53714	1	1	783	26	26932	0		1	Zm00001d012159
GO:0009119	ribonucleoside metabolic process	biological_process	0.5384	1	8	783	270	26932	3	Zm00001d024138,Zm00001d010375,Zm00001d026685	5	Novel00789,Zm00001d014772,Novel00848,Zm00001d036206,Zm00001d040084
GO:0009526	plastid envelope	cellular_component	0.53874	1	4	783	132	26932	3	Zm00001d016714,Zm00001d052410,Zm00001d021245	1	Zm00001d014744
GO:0051649	establishment of localization in cell	biological_process	0.53874	1	15	783	535	26932	5	Zm00001d003913,Zm00001d042044,Zm00001d013114,Zm00001d008345,Zm00001d050462	10	Zm00001d016183,Zm00001d034208,Zm00001d034309,Zm00001d016060,Zm00001d002458,Zm00001d012897,Zm00001d023840,Zm00001d052245,Zm00001d011328,Zm00001d048583
GO:0008219	cell death	biological_process	0.539	1	1	783	26	26932	1	Novel01047	0
GO:0016265	death	biological_process	0.539	1	1	783	26	26932	1	Novel01047	0
GO:0006555	methionine metabolic process	biological_process	0.5397	1	1	783	26	26932	1	Zm00001d013644	0
GO:0006613	cotranslational protein targeting to membrane	biological_process	0.54067	1	1	783	26	26932	1	Zm00001d042044	0
GO:0006614	SRP-dependent cotranslational protein targeting to membrane	biological_process	0.54067	1	1	783	26	26932	1	Zm00001d042044	0
GO:0033218	amide binding	molecular_function	0.54119	1	1	783	26	26932	1	Zm00001d024839	0
GO:0005484	SNAP receptor activity	molecular_function	0.5418	1	1	783	25	26932	1	Zm00001d013114	0
GO:0045490	pectin catabolic process	biological_process	0.54375	1	2	783	60	26932	0		2	Zm00001d017416,Zm00001d032992
GO:0008324	cation transmembrane transporter activity	molecular_function	0.54492	1	11	783	392	26932	2	Zm00001d041308,Zm00001d021461	9	Zm00001d053446,Zm00001d033446,Zm00001d033067,Zm00001d040627,Zm00001d008974,Zm00001d017249,Zm00001d016619,Zm00001d051055,Novel01064
GO:0046112	nucleobase biosynthetic process	biological_process	0.54505	1	1	783	26	26932	0		1	Zm00001d035916
GO:0009888	tissue development	biological_process	0.54513	1	2	783	65	26932	1	Zm00001d053926	1	Novel01469
GO:0042170	plastid membrane	cellular_component	0.54632	1	1	783	27	26932	1	Zm00001d016714	0
GO:0016891	endoribonuclease activity, producing 5'-phosphomonoesters	molecular_function	0.54659	1	1	783	28	26932	1	Zm00001d039451	0
GO:0004674	protein serine/threonine kinase activity	molecular_function	0.54724	1	17	783	618	26932	10	Zm00001d026489,Zm00001d008477,Zm00001d008632,Zm00001d018665,Zm00001d042293,Zm00001d026018,Zm00001d028613,Zm00001d038522,Zm00001d043512,Zm00001d051323	7	Zm00001d050466,Zm00001d041298,Zm00001d026139,Zm00001d050074,Zm00001d043252,Zm00001d037811,Zm00001d012929
GO:0015078	hydrogen ion transmembrane transporter activity	molecular_function	0.54925	1	5	783	172	26932	2	Zm00001d041308,Zm00001d021461	3	Zm00001d016619,Novel01064,Zm00001d051055
GO:0003747	translation release factor activity	molecular_function	0.54939	1	1	783	26	26932	0		1	Zm00001d037868
GO:0008079	translation termination factor activity	molecular_function	0.54939	1	1	783	26	26932	0		1	Zm00001d037868
GO:0006284	base-excision repair	biological_process	0.5496	1	1	783	28	26932	0		1	Zm00001d016801
GO:0006811	ion transport	biological_process	0.54983	1	20	783	715	26932	4	Zm00001d041308,Zm00001d016577,Zm00001d018332,Zm00001d021461	16	Zm00001d042225,Zm00001d019225,Zm00001d013652,Zm00001d037492,Zm00001d053446,Zm00001d033446,Zm00001d016619,Zm00001d051055,Zm00001d028164,Zm00001d040627,Zm00001d017249,Zm00001d033067,Zm00001d016691,Zm00001d000204,Zm00001d033493,Zm00001d008974
GO:0006568	tryptophan metabolic process	biological_process	0.55021	1	1	783	26	26932	0		1	Zm00001d034461
GO:0006586	indolalkylamine metabolic process	biological_process	0.55021	1	1	783	26	26932	0		1	Zm00001d034461
GO:1903047	mitotic cell cycle process	biological_process	0.551	1	2	783	66	26932	0		2	Zm00001d050944,Novel01090
GO:1901505	carbohydrate derivative transporter activity	molecular_function	0.55136	1	1	783	27	26932	0		1	Zm00001d013445
GO:1901068	guanosine-containing compound metabolic process	biological_process	0.55157	1	1	783	27	26932	1	Zm00001d026685	0
GO:0006950	response to stress	biological_process	0.55176	1	36	783	1326	26932	20	Zm00001d021730,Zm00001d037969,Zm00001d023811,Zm00001d016802,Zm00001d008570,Zm00001d048950,Zm00001d030685,Zm00001d048949,Zm00001d014885,Zm00001d054044,Zm00001d053876,Zm00001d052809,Zm00001d017130,Zm00001d026200,Zm00001d024752,Zm00001d028165,Zm00001d040705,Zm00001d011069,Zm00001d024839,Zm00001d023843	16	Zm00001d008974,Zm00001d046781,Zm00001d046625,Zm00001d021843,Zm00001d027245,Zm00001d014568,Zm00001d009373,Zm00001d053839,Zm00001d015212,Novel01082,Zm00001d027233,Novel01469,Zm00001d026139,Zm00001d012929,Zm00001d026154,Zm00001d016801
GO:0015698	inorganic anion transport	biological_process	0.5525	1	2	783	66	26932	0		2	Zm00001d000204,Zm00001d028164
GO:0015267	channel activity	molecular_function	0.55277	1	3	783	107	26932	2	Zm00001d018332,Zm00001d051174	1	Zm00001d053446
GO:0022803	passive transmembrane transporter activity	molecular_function	0.55277	1	3	783	107	26932	2	Zm00001d018332,Zm00001d051174	1	Zm00001d053446
GO:0022838	substrate-specific channel activity	molecular_function	0.55277	1	3	783	107	26932	2	Zm00001d051174,Zm00001d018332	1	Zm00001d053446
GO:0044255	cellular lipid metabolic process	biological_process	0.55329	1	12	783	426	26932	9	Zm00001d008623,Zm00001d027271,Zm00001d008370,Zm00001d031449,Zm00001d008427,Zm00001d006678,Zm00001d016438,Zm00001d005430,Zm00001d016714	3	Zm00001d014292,Zm00001d025170,Zm00001d025545
GO:0071804	cellular potassium ion transport	biological_process	0.55394	1	2	783	69	26932	0		2	Zm00001d033067,Zm00001d053446
GO:0071805	potassium ion transmembrane transport	biological_process	0.55394	1	2	783	69	26932	0		2	Zm00001d053446,Zm00001d033067
GO:0051128	regulation of cellular component organization	biological_process	0.55427	1	3	783	101	26932	0		3	Novel01090,Novel01812,Zm00001d050944
GO:0006629	lipid metabolic process	biological_process	0.55499	1	20	783	705	26932	10	Zm00001d008427,Zm00001d016714,Zm00001d006678,Zm00001d005430,Zm00001d027271,Zm00001d031813,Zm00001d016438,Zm00001d008370,Zm00001d008623,Zm00001d031449	10	Zm00001d031685,Zm00001d011477,Zm00001d013035,Zm00001d050917,Zm00001d025734,Zm00001d025545,Zm00001d005624,Zm00001d025170,Zm00001d019850,Zm00001d014292
GO:0005976	polysaccharide metabolic process	biological_process	0.55592	1	9	783	320	26932	0		9	Zm00001d003817,Zm00001d012159,Zm00001d032992,Zm00001d019479,Zm00001d046127,Zm00001d044566,Zm00001d024071,Zm00001d045261,Zm00001d017416
GO:0070647	protein modification by small protein conjugation or removal	biological_process	0.55595	1	8	783	290	26932	4	Zm00001d044734,Zm00001d029847,Zm00001d023480,Zm00001d024672	4	Zm00001d050712,Zm00001d050944,Zm00001d053897,Zm00001d031241
GO:0009259	ribonucleotide metabolic process	biological_process	0.557	1	8	783	275	26932	3	Zm00001d026685,Zm00001d010375,Zm00001d024138	5	Zm00001d040084,Zm00001d036206,Novel00848,Zm00001d014772,Novel00789
GO:0016877	ligase activity, forming carbon-sulfur bonds	molecular_function	0.55758	1	1	783	30	26932	0		1	Zm00001d051608
GO:0006402	mRNA catabolic process	biological_process	0.55806	1	1	783	29	26932	0		1	Zm00001d026392
GO:0043623	cellular protein complex assembly	biological_process	0.55903	1	4	783	135	26932	2	Zm00001d052902,Zm00001d017751	2	Novel01469,Novel01812
GO:0046872	metal ion binding	molecular_function	0.55975	1	100	783	3493	26932	56	Zm00001d031449,Zm00001d017653,Zm00001d014134,Zm00001d040705,Zm00001d011069,Zm00001d016866,Zm00001d016697,Zm00001d042008,Zm00001d033152,Zm00001d044157,Zm00001d012322,Zm00001d024211,Zm00001d024752,Zm00001d027271,Zm00001d052640,Zm00001d032458,Zm00001d010375,Zm00001d014885,Zm00001d024314,Zm00001d029822,Zm00001d007340,Zm00001d015037,Zm00001d026018,Zm00001d034095,Zm00001d009106,Zm00001d048990,Zm00001d0…	44	Zm00001d045320,Zm00001d021087,Zm00001d026139,Zm00001d038291,Zm00001d051800,Zm00001d052136,Zm00001d021038,Zm00001d014559,Zm00001d035662,Zm00001d042225,Zm00001d009373,Zm00001d036206,Zm00001d032090,Zm00001d000279,Zm00001d051501,Zm00001d020717,Zm00001d049059,Zm00001d029806,Zm00001d018190,Zm00001d033907,Zm00001d041730,Zm00001d029722,Zm00001d033623,Zm00001d051608,Zm00001d042600,Zm00001d043613,Zm00001d0…
GO:0051301	cell division	biological_process	0.55988	1	4	783	138	26932	1	Zm00001d042044	3	Zm00001d050944,Zm00001d026669,Novel01090
GO:0051052	regulation of DNA metabolic process	biological_process	0.5599	1	1	783	29	26932	1	Zm00001d014885	0
GO:0019201	nucleotide kinase activity	molecular_function	0.56105	1	1	783	28	26932	0		1	Zm00001d035916
GO:0007166	cell surface receptor signaling pathway	biological_process	0.5612	1	1	783	30	26932	1	Zm00001d018332	0
GO:0030041	actin filament polymerization	biological_process	0.56192	1	1	783	27	26932	0		1	Novel01812
GO:0030833	regulation of actin filament polymerization	biological_process	0.56192	1	1	783	27	26932	0		1	Novel01812
GO:0015079	potassium ion transmembrane transporter activity	molecular_function	0.56404	1	2	783	71	26932	0		2	Zm00001d053446,Zm00001d033067
GO:0071900	regulation of protein serine/threonine kinase activity	biological_process	0.56446	1	1	783	27	26932	1	Zm00001d026360	0
GO:0005085	guanyl-nucleotide exchange factor activity	molecular_function	0.56495	1	1	783	32	26932	0		1	Zm00001d017755
GO:0043414	macromolecule methylation	biological_process	0.56524	1	4	783	142	26932	2	Zm00001d037860,Zm00001d020437	2	Zm00001d049966,Zm00001d004109
GO:0009084	glutamine family amino acid biosynthetic process	biological_process	0.56556	1	1	783	30	26932	0		1	Zm00001d008974
GO:0071214	cellular response to abiotic stimulus	biological_process	0.56557	1	1	783	32	26932	1	Zm00001d043325	0
GO:0097159	organic cyclic compound binding	molecular_function	0.5658	1	248	783	8717	26932	138	Zm00001d035937,Zm00001d033152,Zm00001d042293,Zm00001d026685,Zm00001d008853,Zm00001d012322,Zm00001d034479,Zm00001d015283,Zm00001d032458,Zm00001d016841,Zm00001d020711,Zm00001d014134,Zm00001d051130,Zm00001d014278,Zm00001d036396,Zm00001d016552,Zm00001d013151,Zm00001d018882,Zm00001d028613,Zm00001d038023,Novel00672,Zm00001d034095,Zm00001d002490,Zm00001d015519,Zm00001d008477,Zm00001d019734,Zm00001d01488…	110	Zm00001d026528,Zm00001d048527,Zm00001d049676,Zm00001d011328,Zm00001d053895,Zm00001d011459,Zm00001d025660,Zm00001d015917,Zm00001d034555,Zm00001d012929,Novel01548,Zm00001d016801,Zm00001d027431,Zm00001d042463,Zm00001d050074,Zm00001d026139,Zm00001d051480,Zm00001d031241,Zm00001d015445,Zm00001d026677,Zm00001d035916,Zm00001d038297,Zm00001d014568,Zm00001d044857,Zm00001d036206,Zm00001d053839,Zm00001d04138…
GO:1901363	heterocyclic compound binding	molecular_function	0.5658	1	248	783	8717	26932	138	Zm00001d014885,Zm00001d029325,Zm00001d029822,Zm00001d007092,Zm00001d019045,Novel00672,Zm00001d034095,Zm00001d002490,Zm00001d015519,Zm00001d008477,Zm00001d019734,Zm00001d014134,Zm00001d020711,Zm00001d051130,Zm00001d014278,Zm00001d036396,Zm00001d016552,Zm00001d013151,Zm00001d018882,Zm00001d028613,Zm00001d038023,Zm00001d035937,Zm00001d033152,Zm00001d042293,Zm00001d026685,Zm00001d012322,Zm00001d00885…	110	Zm00001d044857,Zm00001d014568,Zm00001d036206,Zm00001d053839,Zm00001d041389,Zm00001d024744,Zm00001d046947,Zm00001d048393,Zm00001d035916,Zm00001d038297,Zm00001d011459,Zm00001d053895,Zm00001d025660,Zm00001d034555,Zm00001d015917,Novel01548,Zm00001d012929,Zm00001d016801,Zm00001d027431,Zm00001d050074,Zm00001d042463,Zm00001d026139,Zm00001d051480,Zm00001d031241,Zm00001d015445,Zm00001d026677,Zm00001d02652…
GO:0008289	lipid binding	molecular_function	0.5678	1	4	783	142	26932	2	Zm00001d044686,Novel01047	2	Zm00001d048527,Zm00001d013445
GO:0005667	transcription factor complex	cellular_component	0.56827	1	2	783	65	26932	1	Zm00001d026305	1	Zm00001d006835
GO:0072528	pyrimidine-containing compound biosynthetic process	biological_process	0.56874	1	2	783	65	26932	1	Novel00672	1	Zm00001d035916
GO:0016903	oxidoreductase activity, acting on the aldehyde or oxo group of donors	molecular_function	0.56931	1	2	783	66	26932	1	Zm00001d017418	1	Zm00001d019850
GO:0009653	anatomical structure morphogenesis	biological_process	0.57046	1	3	783	106	26932	1	Zm00001d053926	2	Novel01469,Zm00001d053895
GO:0016799	hydrolase activity, hydrolyzing N-glycosyl compounds	molecular_function	0.57261	1	1	783	28	26932	0		1	Zm00001d016801
GO:0009451	RNA modification	biological_process	0.57285	1	4	783	142	26932	3	Zm00001d052952,Zm00001d036396,Zm00001d037860	1	Zm00001d051608
GO:0008064	regulation of actin polymerization or depolymerization	biological_process	0.57356	1	1	783	28	26932	0		1	Novel01812
GO:0030832	regulation of actin filament length	biological_process	0.57356	1	1	783	28	26932	0		1	Novel01812
GO:0004843	ubiquitin-specific protease activity	molecular_function	0.57481	1	1	783	30	26932	0		1	Zm00001d031241
GO:0015631	tubulin binding	molecular_function	0.57572	1	4	783	153	26932	2	Zm00001d002937,Zm00001d029390	2	Zm00001d045759,Zm00001d023840
GO:0048523	negative regulation of cellular process	biological_process	0.57824	1	6	783	209	26932	3	Novel01047,Zm00001d037969,Zm00001d014885	3	Zm00001d042867,Zm00001d050944,Novel01812
GO:0045047	protein targeting to ER	biological_process	0.57868	1	1	783	29	26932	1	Zm00001d042044	0
GO:0072599	establishment of protein localization to endoplasmic reticulum	biological_process	0.57868	1	1	783	29	26932	1	Zm00001d042044	0
GO:0047262	polygalacturonate 4-alpha-galacturonosyltransferase activity	molecular_function	0.57901	1	1	783	31	26932	1	Zm00001d042514	0
GO:0006414	translational elongation	biological_process	0.57901	1	3	783	104	26932	2	Zm00001d007092,Zm00001d006596	1	Zm00001d045320
GO:0051213	dioxygenase activity	molecular_function	0.58072	1	3	783	101	26932	2	Zm00001d001960,Zm00001d031449	1	Zm00001d033623
GO:0042558	pteridine-containing compound metabolic process	biological_process	0.58225	1	1	783	30	26932	1	Zm00001d026531	0
GO:0032271	regulation of protein polymerization	biological_process	0.58314	1	1	783	29	26932	0		1	Novel01812
GO:0031400	negative regulation of protein modification process	biological_process	0.58449	1	1	783	29	26932	0		1	Zm00001d050944
GO:0000278	mitotic cell cycle	biological_process	0.58489	1	2	783	70	26932	0		2	Novel01090,Zm00001d050944
GO:0016702	oxidoreductase activity, acting on single donors with incorporation of molecular oxygen, incorporation of two atoms of oxygen	molecular_function	0.58576	1	2	783	66	26932	1	Zm00001d031449	1	Zm00001d033623
GO:0061025	membrane fusion	biological_process	0.58598	1	1	783	29	26932	1	Zm00001d013114	0
GO:0005261	cation channel activity	molecular_function	0.58607	1	1	783	32	26932	0		1	Zm00001d053446
GO:1901135	carbohydrate derivative metabolic process	biological_process	0.58648	1	16	783	569	26932	7	Zm00001d026685,Zm00001d014842,Zm00001d024138,Zm00001d012335,Zm00001d010375,Zm00001d014840,Zm00001d009936	9	Novel00848,Novel00789,Zm00001d014772,Zm00001d013052,Zm00001d051634,Zm00001d045261,Zm00001d036206,Zm00001d040084,Zm00001d015008
GO:0032956	regulation of actin cytoskeleton organization	biological_process	0.58672	1	1	783	29	26932	0		1	Novel01812
GO:0032970	regulation of actin filament-based process	biological_process	0.58672	1	1	783	29	26932	0		1	Novel01812
GO:0019783	ubiquitin-like protein-specific protease activity	molecular_function	0.58793	1	1	783	31	26932	0		1	Zm00001d031241
GO:0006302	double-strand break repair	biological_process	0.5888	1	1	783	34	26932	0		1	Zm00001d015212
GO:0006415	translational termination	biological_process	0.58982	1	1	783	29	26932	0		1	Zm00001d037868
GO:0051336	regulation of hydrolase activity	biological_process	0.59139	1	5	783	178	26932	2	Zm00001d037969,Zm00001d007340	3	Zm00001d021087,Zm00001d042867,Zm00001d017755
GO:0098662	inorganic cation transmembrane transport	biological_process	0.59261	1	8	783	297	26932	2	Zm00001d021461,Zm00001d041308	6	Zm00001d051055,Zm00001d016619,Zm00001d017249,Zm00001d033067,Zm00001d033446,Zm00001d053446
GO:0016857	racemase and epimerase activity, acting on carbohydrates and derivatives	molecular_function	0.59272	1	1	783	29	26932	0		1	Zm00001d021050
GO:0009982	pseudouridine synthase activity	molecular_function	0.59566	1	1	783	31	26932	1	Zm00001d036396	0
GO:0043254	regulation of protein complex assembly	biological_process	0.59599	1	1	783	30	26932	0		1	Novel01812
GO:0004536	deoxyribonuclease activity	molecular_function	0.59734	1	1	783	31	26932	0		1	Zm00001d016801
GO:0048869	cellular developmental process	biological_process	0.59828	1	3	783	108	26932	1	Zm00001d053926	2	Zm00001d053895,Novel01469
GO:0015672	monovalent inorganic cation transport	biological_process	0.60088	1	8	783	298	26932	2	Zm00001d041308,Zm00001d021461	6	Zm00001d037492,Zm00001d033067,Zm00001d053446,Zm00001d016619,Zm00001d051055,Zm00001d017249
GO:0006612	protein targeting to membrane	biological_process	0.60093	1	1	783	31	26932	1	Zm00001d042044	0
GO:0000902	cell morphogenesis	biological_process	0.60366	1	1	783	32	26932	1	Zm00001d053926	0
GO:0051536	iron-sulfur cluster binding	molecular_function	0.60436	1	4	783	145	26932	1	Zm00001d016866	3	Zm00001d043619,Zm00001d016619,Zm00001d038291
GO:0051540	metal cluster binding	molecular_function	0.60436	1	4	783	145	26932	1	Zm00001d016866	3	Zm00001d043619,Zm00001d038291,Zm00001d016619
GO:0015031	protein transport	biological_process	0.60479	1	12	783	446	26932	5	Zm00001d008345,Zm00001d006126,Zm00001d013114,Zm00001d003913,Zm00001d042044	7	Zm00001d012897,Zm00001d023840,Zm00001d011328,Zm00001d002458,Zm00001d016060,Zm00001d025660,Zm00001d034309
GO:0009690	cytokinin metabolic process	biological_process	0.60494	1	1	783	30	26932	1	Zm00001d032046	0
GO:0006812	cation transport	biological_process	0.60521	1	14	783	514	26932	3	Zm00001d021461,Zm00001d016577,Zm00001d041308	11	Zm00001d016691,Zm00001d051055,Zm00001d016619,Zm00001d040627,Zm00001d008974,Zm00001d017249,Zm00001d042225,Zm00001d037492,Zm00001d053446,Zm00001d033067,Zm00001d033446
GO:0033036	macromolecule localization	biological_process	0.60623	1	15	783	555	26932	6	Zm00001d008345,Zm00001d044686,Zm00001d006126,Zm00001d013114,Zm00001d003913,Zm00001d042044	9	Zm00001d012897,Zm00001d023840,Zm00001d013445,Zm00001d011328,Zm00001d016060,Zm00001d002458,Zm00001d038911,Zm00001d025660,Zm00001d034309
GO:0009251	glucan catabolic process	biological_process	0.60777	1	1	783	32	26932	0		1	Zm00001d012159
GO:0044247	cellular polysaccharide catabolic process	biological_process	0.60777	1	1	783	32	26932	0		1	Zm00001d012159
GO:0016482	cytoplasmic transport	biological_process	0.608	1	4	783	151	26932	2	Zm00001d042044,Zm00001d008345	2	Zm00001d011328,Zm00001d034309
GO:0052689	carboxylic ester hydrolase activity	molecular_function	0.60812	1	3	783	107	26932	0		3	Zm00001d032992,Zm00001d011477,Zm00001d031934
GO:0006694	steroid biosynthetic process	biological_process	0.60817	1	1	783	31	26932	0		1	Zm00001d013035
GO:0004427	inorganic diphosphatase activity	molecular_function	0.6105	1	1	783	33	26932	0		1	Zm00001d037492
GO:0022836	gated channel activity	molecular_function	0.61167	1	2	783	78	26932	1	Zm00001d018332	1	Zm00001d053446
GO:0009636	response to toxic substance	biological_process	0.61181	1	1	783	32	26932	1	Zm00001d024839	0
GO:0051273	beta-glucan metabolic process	biological_process	0.61303	1	3	783	118	26932	0		3	Zm00001d012159,Zm00001d044566,Zm00001d046127
GO:0008026	ATP-dependent helicase activity	molecular_function	0.61397	1	1	783	37	26932	0		1	Zm00001d015212
GO:0070035	purine NTP-dependent helicase activity	molecular_function	0.61397	1	1	783	37	26932	0		1	Zm00001d015212
GO:0051641	cellular localization	biological_process	0.61472	1	15	783	561	26932	5	Zm00001d042044,Zm00001d003913,Zm00001d013114,Zm00001d050462,Zm00001d008345	10	Zm00001d034208,Zm00001d034309,Zm00001d016183,Zm00001d016060,Zm00001d002458,Zm00001d011328,Zm00001d052245,Zm00001d023840,Zm00001d012897,Zm00001d048583
GO:1901264	carbohydrate derivative transport	biological_process	0.61594	1	1	783	32	26932	0		1	Zm00001d013445
GO:0003993	acid phosphatase activity	molecular_function	0.6162	1	1	783	32	26932	1	Zm00001d010373	0
GO:0065007	biological regulation	biological_process	0.61806	1	105	783	3762	26932	51	Zm00001d016457,Zm00001d007340,Zm00001d048991,Zm00001d041886,Zm00001d014885,Zm00001d019734,Zm00001d017187,Zm00001d027530,Zm00001d038023,Zm00001d013151,Novel01559,Zm00001d037607,Zm00001d020711,Zm00001d026305,Zm00001d051851,Zm00001d026447,Zm00001d043094,Zm00001d039531,Zm00001d043325,Zm00001d009619,Zm00001d024768,Zm00001d043025,Zm00001d036364,Zm00001d012335,Novel01309,Zm00001d050247,Zm00001d015226,Zm…	54	Zm00001d027245,Zm00001d039032,Zm00001d023869,Zm00001d046947,Zm00001d044857,Zm00001d046751,Zm00001d042345,Zm00001d051480,Zm00001d026139,Zm00001d052769,Zm00001d042463,Zm00001d021087,Zm00001d012413,Zm00001d027431,Zm00001d008190,Zm00001d013126,Novel00326,Zm00001d016277,Zm00001d045320,Zm00001d011328,Zm00001d016740,Zm00001d010634,Zm00001d027233,Novel01082,Zm00001d041453,Zm00001d028603,Zm00001d028984,Zm…
GO:0003924	GTPase activity	molecular_function	0.61816	1	7	783	256	26932	3	Zm00001d014278,Zm00001d006596,Novel01296	4	Zm00001d026669,Zm00001d048393,Zm00001d011328,Zm00001d025660
GO:0019362	pyridine nucleotide metabolic process	biological_process	0.61851	1	4	783	145	26932	2	Zm00001d024138,Zm00001d010375	2	Zm00001d036206,Zm00001d040084
GO:0046496	nicotinamide nucleotide metabolic process	biological_process	0.61851	1	4	783	145	26932	2	Zm00001d010375,Zm00001d024138	2	Zm00001d040084,Zm00001d036206
GO:0048569	post-embryonic organ development	biological_process	0.61997	1	1	783	34	26932	0		1	Zm00001d053895
GO:0046915	transition metal ion transmembrane transporter activity	molecular_function	0.62029	1	1	783	33	26932	0		1	Zm00001d033446
GO:1901575	organic substance catabolic process	biological_process	0.6241	1	20	783	730	26932	7	Zm00001d014842,Zm00001d024138,Zm00001d051166,Zm00001d014840,Zm00001d031813,Zm00001d009936,Zm00001d010375	13	Zm00001d031934,Zm00001d032992,Zm00001d050944,Zm00001d051194,Zm00001d017416,Zm00001d015372,Zm00001d023437,Novel01090,Zm00001d012159,Zm00001d053897,Zm00001d036206,Zm00001d026392,Zm00001d040084
GO:0004175	endopeptidase activity	molecular_function	0.62604	1	11	783	408	26932	5	Zm00001d020886,Zm00001d007753,Novel00755,Zm00001d002678,Zm00001d047634	6	Zm00001d021231,Zm00001d021283,Zm00001d005859,Zm00001d051779,Zm00001d016477,Zm00001d002833
GO:0005741	mitochondrial outer membrane	cellular_component	0.62704	1	1	783	33	26932	0		1	Novel00092
GO:0030695	GTPase regulator activity	molecular_function	0.62719	1	2	783	74	26932	1	Zm00001d007340	1	Zm00001d021087
GO:0044436	thylakoid part	cellular_component	0.62722	1	6	783	213	26932	4	Zm00001d045144,Zm00001d049743,Zm00001d054015,Zm00001d021245	2	Novel01204,Novel00894
GO:0050896	response to stimulus	biological_process	0.62938	1	61	783	2258	26932	33	Zm00001d000196,Zm00001d001960,Zm00001d016802,Zm00001d048950,Zm00001d008570,Zm00001d030685,Zm00001d037969,Zm00001d023811,Zm00001d033462,Zm00001d021730,Zm00001d012335,Zm00001d014885,Zm00001d054044,Zm00001d048949,Zm00001d042692,Zm00001d013619,Zm00001d024752,Zm00001d043325,Zm00001d026200,Zm00001d052809,Zm00001d017130,Zm00001d053876,Zm00001d018332,Zm00001d011069,Novel01047,Zm00001d033463,Zm00001d02384…	28	Zm00001d012128,Zm00001d021843,Zm00001d046625,Zm00001d052148,Zm00001d008974,Zm00001d046781,Zm00001d042345,Zm00001d021629,Zm00001d015212,Zm00001d014568,Zm00001d053839,Zm00001d009373,Zm00001d027245,Novel00972,Novel01082,Zm00001d027233,Zm00001d025947,Zm00001d000195,Zm00001d011328,Zm00001d028311,Zm00001d012929,Zm00001d016277,Zm00001d019225,Zm00001d026154,Zm00001d016801,Zm00001d026139,Zm00001d042463,No…
GO:0032535	regulation of cellular component size	biological_process	0.6308	1	1	783	33	26932	0		1	Novel01812
GO:0072527	pyrimidine-containing compound metabolic process	biological_process	0.63119	1	2	783	73	26932	1	Novel00672	1	Zm00001d035916
GO:0016645	oxidoreductase activity, acting on the CH-NH group of donors	molecular_function	0.63121	1	1	783	33	26932	1	Zm00001d032046	0
GO:0017038	protein import	biological_process	0.63168	1	1	783	35	26932	1	Zm00001d008345	0
GO:0034660	ncRNA metabolic process	biological_process	0.6332	1	8	783	305	26932	5	Zm00001d037860,Zm00001d002483,Zm00001d052952,Zm00001d015037,Zm00001d021962	3	Zm00001d051608,Zm00001d031685,Zm00001d031241
GO:0048366	leaf development	biological_process	0.63572	1	1	783	35	26932	1	Zm00001d028165	0
GO:0072521	purine-containing compound metabolic process	biological_process	0.63705	1	8	783	294	26932	3	Zm00001d024138,Zm00001d010375,Zm00001d026685	5	Novel00789,Zm00001d014772,Novel00848,Zm00001d036206,Zm00001d040084
GO:0042744	hydrogen peroxide catabolic process	biological_process	0.63787	1	4	783	142	26932	3	Zm00001d054044,Zm00001d040705,Zm00001d024752	1	Zm00001d009373
GO:0043566	structure-specific DNA binding	molecular_function	0.6389	1	2	783	77	26932	2	Zm00001d049743,Zm00001d017130	0
GO:0009112	nucleobase metabolic process	biological_process	0.63993	1	1	783	34	26932	0		1	Zm00001d035916
GO:0005759	mitochondrial matrix	cellular_component	0.64004	1	1	783	34	26932	1	Zm00001d017187	0
GO:0070925	organelle assembly	biological_process	0.64019	1	1	783	35	26932	1	Zm00001d027919	0
GO:0005525	GTP binding	molecular_function	0.64197	1	9	783	336	26932	5	Zm00001d006596,Novel01296,Zm00001d014278,Zm00001d042044,Zm00001d016832	4	Zm00001d048393,Zm00001d011328,Zm00001d026669,Zm00001d025660
GO:0032561	guanyl ribonucleotide binding	molecular_function	0.64197	1	9	783	336	26932	5	Zm00001d006596,Novel01296,Zm00001d014278,Zm00001d042044,Zm00001d016832	4	Zm00001d011328,Zm00001d048393,Zm00001d026669,Zm00001d025660
GO:0090066	regulation of anatomical structure size	biological_process	0.64219	1	1	783	34	26932	0		1	Novel01812
GO:0045184	establishment of protein localization	biological_process	0.64253	1	12	783	458	26932	5	Zm00001d013114,Zm00001d008345,Zm00001d006126,Zm00001d003913,Zm00001d042044	7	Zm00001d012897,Zm00001d023840,Zm00001d011328,Zm00001d025660,Zm00001d034309,Zm00001d002458,Zm00001d016060
GO:0065003	macromolecular complex assembly	biological_process	0.64321	1	8	783	296	26932	6	Zm00001d021422,Zm00001d034479,Zm00001d027919,Zm00001d038851,Zm00001d052902,Zm00001d017751	2	Novel01469,Novel01812
GO:0010411	xyloglucan metabolic process	biological_process	0.6439	1	1	783	33	26932	0		1	Zm00001d024071
GO:0019001	guanyl nucleotide binding	molecular_function	0.64552	1	9	783	337	26932	5	Zm00001d006596,Zm00001d014278,Zm00001d042044,Zm00001d016832,Novel01296	4	Zm00001d026669,Zm00001d011328,Zm00001d048393,Zm00001d025660
GO:0043168	anion binding	molecular_function	0.64705	1	105	783	3904	26932	50	Zm00001d010375,Zm00001d025333,Zm00001d015037,Zm00001d046923,Zm00001d026018,Zm00001d045544,Zm00001d000399,Zm00001d018665,Zm00001d008477,Zm00001d003212,Zm00001d051130,Zm00001d043512,Zm00001d014278,Zm00001d032069,Zm00001d028613,Zm00001d035937,Zm00001d042293,Zm00001d026685,Zm00001d008632,Zm00001d052809,Zm00001d026060,Zm00001d016841,Zm00001d051323,Zm00001d016832,Zm00001d052906,Zm00001d037005,Zm00001d0…	55	Zm00001d053761,Zm00001d036206,Zm00001d037507,Zm00001d024744,Zm00001d041814,Zm00001d048393,Zm00001d021684,Zm00001d035916,Zm00001d033907,Zm00001d016242,Zm00001d013606,Zm00001d020058,Zm00001d034555,Zm00001d025660,Zm00001d011459,Zm00001d012929,Zm00001d045759,Zm00001d053897,Zm00001d050074,Zm00001d031241,Zm00001d026139,Zm00001d026677,Zm00001d015445,Zm00001d024518,Zm00001d030551,Zm00001d011328,Zm00001d0…
GO:0090501	RNA phosphodiester bond hydrolysis	biological_process	0.64742	1	2	783	77	26932	1	Zm00001d039451	1	Zm00001d022630
GO:0042743	hydrogen peroxide metabolic process	biological_process	0.64759	1	4	783	144	26932	3	Zm00001d024752,Zm00001d040705,Zm00001d054044	1	Zm00001d009373
GO:0022890	inorganic cation transmembrane transporter activity	molecular_function	0.64767	1	9	783	348	26932	2	Zm00001d021461,Zm00001d041308	7	Zm00001d017249,Novel01064,Zm00001d016619,Zm00001d051055,Zm00001d033067,Zm00001d033446,Zm00001d053446
GO:0000272	polysaccharide catabolic process	biological_process	0.64921	1	3	783	112	26932	0		3	Zm00001d017416,Zm00001d012159,Zm00001d032992
GO:0005852	eukaryotic translation initiation factor 3 complex	cellular_component	0.65046	1	1	783	36	26932	0		1	Zm00001d014873
GO:0072594	establishment of protein localization to organelle	biological_process	0.65091	1	2	783	77	26932	2	Zm00001d042044,Zm00001d008345	0
GO:0006886	intracellular protein transport	biological_process	0.65115	1	8	783	315	26932	3	Zm00001d042044,Zm00001d008345,Zm00001d013114	5	Zm00001d016060,Zm00001d002458,Zm00001d023840,Zm00001d012897,Zm00001d011328
GO:0044248	cellular catabolic process	biological_process	0.65237	1	17	783	629	26932	7	Zm00001d014842,Zm00001d051166,Zm00001d024752,Zm00001d014840,Zm00001d009936,Zm00001d040705,Zm00001d054044	10	Zm00001d031934,Zm00001d050944,Zm00001d051194,Zm00001d023437,Zm00001d015372,Novel01090,Zm00001d012159,Zm00001d053897,Zm00001d009373,Zm00001d026392
GO:0016051	carbohydrate biosynthetic process	biological_process	0.65477	1	6	783	242	26932	0		6	Zm00001d003817,Zm00001d046127,Zm00001d044566,Zm00001d014292,Zm00001d045261,Zm00001d019479
GO:0016701	oxidoreductase activity, acting on single donors with incorporation of molecular oxygen	molecular_function	0.6563	1	2	783	75	26932	1	Zm00001d031449	1	Zm00001d033623
GO:0019693	ribose phosphate metabolic process	biological_process	0.6566	1	8	783	300	26932	3	Zm00001d024138,Zm00001d010375,Zm00001d026685	5	Zm00001d014772,Novel00789,Novel00848,Zm00001d040084,Zm00001d036206
GO:0071310	cellular response to organic substance	biological_process	0.65944	1	5	783	202	26932	2	Zm00001d012335,Zm00001d028165	3	Zm00001d016277,Zm00001d015212,Zm00001d042345
GO:0043085	positive regulation of catalytic activity	biological_process	0.66061	1	3	783	122	26932	1	Zm00001d007340	2	Zm00001d017755,Zm00001d021087
GO:0044093	positive regulation of molecular function	biological_process	0.66061	1	3	783	122	26932	1	Zm00001d007340	2	Zm00001d021087,Zm00001d017755
GO:0044087	regulation of cellular component biogenesis	biological_process	0.66201	1	1	783	36	26932	0		1	Novel01812
GO:0042254	ribosome biogenesis	biological_process	0.66365	1	4	783	155	26932	4	Zm00001d052952,Zm00001d027919,Zm00001d002483,Zm00001d003618	0
GO:0090304	nucleic acid metabolic process	biological_process	0.66381	1	98	783	3581	26932	48	Zm00001d013489,Zm00001d036364,Zm00001d039451,Zm00001d024768,Zm00001d043025,Novel00029,Zm00001d034920,Zm00001d015226,Zm00001d050247,Zm00001d052952,Zm00001d002483,Zm00001d037860,Zm00001d021962,Zm00001d017462,Zm00001d009939,Zm00001d047523,Zm00001d017720,Zm00001d029940,Novel01047,Zm00001d022437,Zm00001d019475,Zm00001d052564,Novel01202,Zm00001d043663,Zm00001d017130,Zm00001d014628,Zm00001d049743,Zm0000…	50	Zm00001d028984,Zm00001d006835,Zm00001d027925,Zm00001d039077,Zm00001d017477,Novel01406,Zm00001d015212,Zm00001d001838,Zm00001d022526,Zm00001d026421,Zm00001d026096,Zm00001d032144,Zm00001d026182,Zm00001d034160,Zm00001d012128,Zm00001d016298,Novel01032,Novel01090,Zm00001d008817,Zm00001d051608,Zm00001d026392,Zm00001d031685,Zm00001d039506,Zm00001d021268,Zm00001d022630,Zm00001d039032,Zm00001d027245,Zm0000…
GO:0000302	response to reactive oxygen species	biological_process	0.66411	1	1	783	36	26932	0		1	Zm00001d012929
GO:0071554	cell wall organization or biogenesis	biological_process	0.66532	1	10	783	375	26932	5	Zm00001d009936,Zm00001d035494,Zm00001d014840,Zm00001d014842,Zm00001d015256	5	Zm00001d047276,Zm00001d032992,Zm00001d024071,Zm00001d046127,Zm00001d035899
GO:0016762	xyloglucan:xyloglucosyl transferase activity	molecular_function	0.66553	1	1	783	35	26932	0		1	Zm00001d024071
GO:0000280	nuclear division	biological_process	0.6662	1	2	783	81	26932	0		2	Zm00001d050944,Novel01090
GO:0009057	macromolecule catabolic process	biological_process	0.6664	1	11	783	421	26932	3	Zm00001d014840,Zm00001d014842,Zm00001d009936	8	Novel01090,Zm00001d032992,Zm00001d012159,Zm00001d050944,Zm00001d053897,Zm00001d017416,Zm00001d015372,Zm00001d026392
GO:0070972	protein localization to endoplasmic reticulum	biological_process	0.66707	1	1	783	37	26932	1	Zm00001d042044	0
GO:0070887	cellular response to chemical stimulus	biological_process	0.66729	1	6	783	242	26932	2	Zm00001d012335,Zm00001d028165	4	Zm00001d016277,Novel00972,Zm00001d015212,Zm00001d042345
GO:0004620	phospholipase activity	molecular_function	0.66849	1	1	783	38	26932	0		1	Zm00001d011477
GO:0005681	spliceosomal complex	cellular_component	0.6688	1	1	783	37	26932	1	Zm00001d013489	0
GO:0044275	cellular carbohydrate catabolic process	biological_process	0.66894	1	1	783	38	26932	0		1	Zm00001d012159
GO:0000786	nucleosome	cellular_component	0.66997	1	3	783	112	26932	3	Zm00001d019045,Zm00001d021422,Zm00001d034479	0
GO:0072524	pyridine-containing compound metabolic process	biological_process	0.67045	1	4	783	155	26932	2	Zm00001d010375,Zm00001d024138	2	Zm00001d040084,Zm00001d036206
GO:0097306	cellular response to alcohol	biological_process	0.6706	1	1	783	39	26932	0		1	Zm00001d015212
GO:0000097	sulfur amino acid biosynthetic process	biological_process	0.67072	1	1	783	37	26932	1	Zm00001d013644	0
GO:0008202	steroid metabolic process	biological_process	0.67079	1	1	783	37	26932	0		1	Zm00001d013035
GO:0071407	cellular response to organic cyclic compound	biological_process	0.67133	1	1	783	41	26932	1	Zm00001d028165	0
GO:0045259	proton-transporting ATP synthase complex	cellular_component	0.67836	1	1	783	37	26932	0		1	Zm00001d015431
GO:0016049	cell growth	biological_process	0.67881	1	1	783	40	26932	0		1	Zm00001d047276
GO:0044815	DNA packaging complex	cellular_component	0.67902	1	3	783	114	26932	3	Zm00001d021422,Zm00001d034479,Zm00001d019045	0
GO:0016854	racemase and epimerase activity	molecular_function	0.68031	1	1	783	37	26932	0		1	Zm00001d021050
GO:0016709	oxidoreductase activity, acting on paired donors, with incorporation or reduction of molecular oxygen, NAD(P)H as one donor, and incorporation of one atom of oxygen	molecular_function	0.68074	1	1	783	38	26932	0		1	Zm00001d025545
GO:0008104	protein localization	biological_process	0.68169	1	12	783	471	26932	5	Zm00001d008345,Zm00001d006126,Zm00001d013114,Zm00001d003913,Zm00001d042044	7	Zm00001d023840,Zm00001d012897,Zm00001d011328,Zm00001d002458,Zm00001d016060,Zm00001d025660,Zm00001d034309
GO:0032403	protein complex binding	molecular_function	0.68178	1	4	783	174	26932	2	Zm00001d029390,Zm00001d002937	2	Zm00001d045759,Zm00001d023840
GO:0008135	translation factor activity, RNA binding	molecular_function	0.68317	1	7	783	273	26932	2	Zm00001d006596,Zm00001d007092	5	Zm00001d015917,Zm00001d045320,Zm00001d037868,Zm00001d041389,Zm00001d014873
GO:1902600	hydrogen ion transmembrane transport	biological_process	0.68392	1	4	783	162	26932	2	Zm00001d041308,Zm00001d021461	2	Zm00001d016619,Zm00001d051055
GO:0019684	photosynthesis, light reaction	biological_process	0.68442	1	2	783	78	26932	2	Zm00001d017751,Novel00001	0
GO:0043167	ion binding	molecular_function	0.68507	1	195	783	7066	26932	100	Zm00001d008427,Zm00001d009473,Zm00001d011315,Zm00001d001960,Zm00001d002937,Zm00001d044156,Zm00001d037005,Zm00001d021403,Zm00001d054044,Zm00001d014958,Zm00001d034540,Zm00001d032046,Zm00001d053876,Zm00001d015976,Zm00001d046342,Zm00001d016577,Zm00001d048819,Zm00001d048451,Zm00001d015032,Zm00001d021638,Zm00001d016963,Zm00001d038522,Zm00001d024839,Zm00001d048635,Zm00001d024843,Zm00001d022234,Zm00001d0…	95	Zm00001d011006,Zm00001d016691,Zm00001d003522,Novel01885,Zm00001d047837,Zm00001d015444,Zm00001d008620,Zm00001d051424,Zm00001d037811,GRMZM5G815453,Zm00001d035659,Zm00001d044120,Zm00001d010159,Zm00001d031685,Zm00001d026669,Zm00001d023840,Zm00001d003690,Zm00001d005630,Zm00001d016396,Zm00001d013276,Zm00001d043613,Zm00001d039487,Zm00001d042600,Zm00001d034074,Zm00001d033623,Zm00001d051608,Zm00001d029722…
GO:1901701	cellular response to oxygen-containing compound	biological_process	0.68898	1	2	783	84	26932	1	Zm00001d028165	1	Zm00001d015212
GO:0006733	oxidoreduction coenzyme metabolic process	biological_process	0.68935	1	4	783	159	26932	2	Zm00001d010375,Zm00001d024138	2	Zm00001d040084,Zm00001d036206
GO:0001871	pattern binding	molecular_function	0.68993	1	2	783	86	26932	1	Zm00001d008477	1	Zm00001d002256
GO:0030247	polysaccharide binding	molecular_function	0.68993	1	2	783	86	26932	1	Zm00001d008477	1	Zm00001d002256
GO:0016746	transferase activity, transferring acyl groups	molecular_function	0.69059	1	12	783	454	26932	8	Zm00001d035246,Zm00001d005430,Zm00001d016438,Zm00001d032527,Zm00001d008756,Zm00001d034417,Zm00001d012333,Zm00001d024763	4	Zm00001d031685,Zm00001d004109,Zm00001d031212,Zm00001d021073
GO:0071944	cell periphery	cellular_component	0.69122	1	16	783	611	26932	5	Zm00001d003913,Zm00001d051174,Zm00001d050462,Zm00001d028338,Novel01880	11	Zm00001d048583,Novel01469,Zm00001d024071,Zm00001d034208,Novel01812,Zm00001d032992,Zm00001d010440,Zm00001d041067,Zm00001d052245,Zm00001d023673,Zm00001d044566
GO:0016485	protein processing	biological_process	0.69166	1	1	783	41	26932	0		1	Zm00001d051850
GO:0008081	phosphoric diester hydrolase activity	molecular_function	0.69305	1	1	783	43	26932	0		1	Zm00001d050917
GO:0051274	beta-glucan biosynthetic process	biological_process	0.69377	1	2	783	92	26932	0		2	Zm00001d044566,Zm00001d046127
GO:0005737	cytoplasm	cellular_component	0.69474	1	99	783	3536	26932	55	Zm00001d018096,Zm00001d051166,Zm00001d034724,Zm00001d043325,Zm00001d036129,Zm00001d035937,Zm00001d026685,Zm00001d014945,Zm00001d045144,Zm00001d027271,Zm00001d016866,Zm00001d021245,Zm00001d027919,Zm00001d016006,Zm00001d011069,Zm00001d017187,Zm00001d003411,Zm00001d015204,Zm00001d011596,Zm00001d002490,Zm00001d000399,Zm00001d045544,Zm00001d038975,Zm00001d015037,Zm00001d025333,Zm00001d052410,Zm00001d0…	44	Zm00001d014772,Zm00001d038291,Zm00001d016850,Zm00001d016619,Zm00001d048583,Zm00001d031241,Zm00001d025660,Zm00001d021087,Zm00001d013052,Zm00001d014744,Zm00001d008974,Zm00001d016864,Zm00001d016060,Novel00972,Zm00001d000279,Zm00001d034208,Zm00001d036206,Zm00001d013445,Zm00001d052245,Zm00001d013013,Zm00001d026669,Zm00001d019479,Novel01317,Novel00092,Zm00001d051055,Zm00001d037868,Zm00001d042600,Novel0…
GO:0008378	galactosyltransferase activity	molecular_function	0.69517	1	1	783	41	26932	0		1	Zm00001d013052
GO:0006605	protein targeting	biological_process	0.69531	1	2	783	84	26932	2	Zm00001d008345,Zm00001d042044	0
GO:0006139	nucleobase-containing compound metabolic process	biological_process	0.69537	1	110	783	4027	26932	51	Zm00001d024768,Zm00001d039451,Zm00001d043025,Zm00001d036364,Zm00001d013489,Novel00029,Zm00001d052952,Zm00001d015226,Zm00001d034920,Zm00001d050247,Zm00001d024138,Zm00001d037860,Zm00001d002483,Zm00001d009939,Zm00001d017462,Zm00001d021962,Zm00001d017720,Zm00001d029940,Novel01047,Zm00001d047523,Zm00001d017130,Zm00001d043663,Novel01202,Zm00001d014628,Zm00001d022437,Zm00001d052564,Zm00001d019475,Zm0000…	59	Zm00001d006835,Zm00001d028984,Zm00001d015008,Zm00001d001838,Zm00001d015212,Zm00001d027925,Novel01406,Zm00001d017477,Zm00001d040084,Zm00001d039077,Zm00001d026421,Zm00001d026096,Zm00001d022526,Zm00001d034160,Zm00001d012128,Zm00001d016298,Zm00001d026182,Zm00001d032144,Novel01090,Zm00001d008817,Novel01032,Zm00001d051634,Zm00001d051608,Zm00001d026392,Zm00001d031685,Zm00001d039506,Novel00789,Zm00001d02…
GO:0044445	cytosolic part	cellular_component	0.69557	1	1	783	39	26932	1	Zm00001d027919	0
GO:0016776	phosphotransferase activity, phosphate group as acceptor	molecular_function	0.69579	1	1	783	40	26932	0		1	Zm00001d035916
GO:0070566	adenylyltransferase activity	molecular_function	0.69712	1	1	783	41	26932	0		1	Zm00001d051608
GO:0016278	lysine N-methyltransferase activity	molecular_function	0.69896	1	1	783	43	26932	1	Zm00001d020437	0
GO:0016279	protein-lysine N-methyltransferase activity	molecular_function	0.69896	1	1	783	43	26932	1	Zm00001d020437	0
GO:0004177	aminopeptidase activity	molecular_function	0.69897	1	1	783	41	26932	0		1	Zm00001d007391
GO:0048583	regulation of response to stimulus	biological_process	0.69983	1	3	783	128	26932	2	Zm00001d012335,Zm00001d043325	1	Zm00001d026139
GO:0016679	oxidoreductase activity, acting on diphenols and related substances as donors	molecular_function	0.69984	1	1	783	40	26932	0		1	Zm00001d016619
GO:0008374	O-acyltransferase activity	molecular_function	0.70034	1	1	783	41	26932	0		1	Zm00001d031685
GO:0019637	organophosphate metabolic process	biological_process	0.70079	1	16	783	619	26932	5	Zm00001d026685,Novel00672,Zm00001d024138,Zm00001d010375,Zm00001d016866	11	Zm00001d016850,Zm00001d033907,Zm00001d035916,Novel00848,Novel00789,Zm00001d014772,Zm00001d014292,Zm00001d036206,Zm00001d051608,Zm00001d040084,Zm00001d015008
GO:0032993	protein-DNA complex	cellular_component	0.70172	1	3	783	118	26932	3	Zm00001d019045,Zm00001d034479,Zm00001d021422	0
GO:0000041	transition metal ion transport	biological_process	0.70184	1	1	783	41	26932	0		1	Zm00001d033446
GO:0000160	phosphorelay signal transduction system	biological_process	0.70219	1	2	783	90	26932	0		2	Zm00001d012128,Zm00001d042463
GO:0006818	hydrogen transport	biological_process	0.7023	1	5	783	206	26932	2	Zm00001d021461,Zm00001d041308	3	Zm00001d051055,Zm00001d016619,Zm00001d037492
GO:0015992	proton transport	biological_process	0.7023	1	5	783	206	26932	2	Zm00001d021461,Zm00001d041308	3	Zm00001d051055,Zm00001d016619,Zm00001d037492
GO:0016887	ATPase activity	molecular_function	0.70239	1	8	783	351	26932	4	Zm00001d017720,Zm00001d020811,Zm00001d021647,Zm00001d011315	4	Zm00001d015212,Zm00001d011006,Zm00001d016794,Zm00001d016396
GO:0004866	endopeptidase inhibitor activity	molecular_function	0.70344	1	2	783	79	26932	1	Zm00001d037969	1	Zm00001d042867
GO:0010466	negative regulation of peptidase activity	biological_process	0.70344	1	2	783	79	26932	1	Zm00001d037969	1	Zm00001d042867
GO:0010951	negative regulation of endopeptidase activity	biological_process	0.70344	1	2	783	79	26932	1	Zm00001d037969	1	Zm00001d042867
GO:0030414	peptidase inhibitor activity	molecular_function	0.70344	1	2	783	79	26932	1	Zm00001d037969	1	Zm00001d042867
GO:0052547	regulation of peptidase activity	biological_process	0.70344	1	2	783	79	26932	1	Zm00001d037969	1	Zm00001d042867
GO:0052548	regulation of endopeptidase activity	biological_process	0.70344	1	2	783	79	26932	1	Zm00001d037969	1	Zm00001d042867
GO:0061134	peptidase regulator activity	molecular_function	0.70344	1	2	783	79	26932	1	Zm00001d037969	1	Zm00001d042867
GO:0061135	endopeptidase regulator activity	molecular_function	0.70344	1	2	783	79	26932	1	Zm00001d037969	1	Zm00001d042867
GO:0031968	organelle outer membrane	cellular_component	0.70512	1	1	783	41	26932	0		1	Novel00092
GO:0009117	nucleotide metabolic process	biological_process	0.7055	1	10	783	390	26932	3	Zm00001d024138,Zm00001d010375,Zm00001d026685	7	Novel00789,Zm00001d015008,Zm00001d014772,Novel00848,Zm00001d035916,Zm00001d036206,Zm00001d040084
GO:0032989	cellular component morphogenesis	biological_process	0.70556	1	1	783	42	26932	1	Zm00001d053926	0
GO:0045934	negative regulation of nucleobase-containing compound metabolic process	biological_process	0.70724	1	1	783	44	26932	1	Zm00001d014885	0
GO:0032269	negative regulation of cellular protein metabolic process	biological_process	0.70771	1	3	783	119	26932	1	Zm00001d037969	2	Zm00001d050944,Zm00001d042867
GO:0051248	negative regulation of protein metabolic process	biological_process	0.70771	1	3	783	119	26932	1	Zm00001d037969	2	Zm00001d050944,Zm00001d042867
GO:0016893	endonuclease activity, active with either ribo- or deoxyribonucleic acids and producing 5'-phosphomonoesters	molecular_function	0.70806	1	1	783	43	26932	1	Zm00001d039451	0
GO:0006753	nucleoside phosphate metabolic process	biological_process	0.70827	1	10	783	391	26932	3	Zm00001d024138,Zm00001d010375,Zm00001d026685	7	Zm00001d015008,Novel00789,Zm00001d014772,Novel00848,Zm00001d035916,Zm00001d036206,Zm00001d040084
GO:0050661	NADP binding	molecular_function	0.70972	1	2	783	84	26932	2	Zm00001d025288,Zm00001d008427	0
GO:0046907	intracellular transport	biological_process	0.71042	1	11	783	447	26932	3	Zm00001d042044,Zm00001d013114,Zm00001d008345	8	Zm00001d016183,Zm00001d034309,Zm00001d016060,Zm00001d002458,Zm00001d012897,Zm00001d023840,Zm00001d011328,Zm00001d048583
GO:2000113	negative regulation of cellular macromolecule biosynthetic process	biological_process	0.71093	1	1	783	43	26932	1	Zm00001d014885	0
GO:0030243	cellulose metabolic process	biological_process	0.71497	1	2	783	92	26932	0		2	Zm00001d046127,Zm00001d012159
GO:0000096	sulfur amino acid metabolic process	biological_process	0.71754	1	1	783	42	26932	1	Zm00001d013644	0
GO:0051493	regulation of cytoskeleton organization	biological_process	0.71756	1	1	783	42	26932	0		1	Novel01812
GO:0044262	cellular carbohydrate metabolic process	biological_process	0.71844	1	8	783	332	26932	0		8	Zm00001d024071,Zm00001d044566,Zm00001d046127,Zm00001d045261,Zm00001d014292,Zm00001d019479,Zm00001d003817,Zm00001d012159
GO:0071396	cellular response to lipid	biological_process	0.72057	1	1	783	45	26932	0		1	Zm00001d015212
GO:0016759	cellulose synthase activity	molecular_function	0.72318	1	1	783	49	26932	0		1	Zm00001d046127
GO:0016760	cellulose synthase (UDP-forming) activity	molecular_function	0.72318	1	1	783	49	26932	0		1	Zm00001d046127
GO:0098797	plasma membrane protein complex	cellular_component	0.72342	1	1	783	48	26932	0		1	Zm00001d044566
GO:0016192	vesicle-mediated transport	biological_process	0.72417	1	8	783	335	26932	3	Zm00001d050462,Zm00001d013114,Zm00001d026164	5	Novel01074,Zm00001d016183,Zm00001d034208,Zm00001d012897,Zm00001d052245
GO:0030246	carbohydrate binding	molecular_function	0.72421	1	7	783	294	26932	4	Zm00001d008477,Zm00001d052906,Zm00001d042293,Zm00001d004524	3	Zm00001d038651,Zm00001d013052,Zm00001d002256
GO:0004713	protein tyrosine kinase activity	molecular_function	0.72451	1	1	783	45	26932	0		1	Zm00001d024744
GO:0018108	peptidyl-tyrosine phosphorylation	biological_process	0.72451	1	1	783	45	26932	0		1	Zm00001d024744
GO:0031324	negative regulation of cellular metabolic process	biological_process	0.72516	1	4	783	165	26932	2	Zm00001d014885,Zm00001d037969	2	Zm00001d050944,Zm00001d042867
GO:0090407	organophosphate biosynthetic process	biological_process	0.72538	1	7	783	286	26932	3	Novel00672,Zm00001d016866,Zm00001d026685	4	Zm00001d035916,Zm00001d051608,Zm00001d016850,Zm00001d014292
GO:0009056	catabolic process	biological_process	0.72542	1	24	783	913	26932	10	Zm00001d040705,Zm00001d054044,Zm00001d010375,Zm00001d009936,Zm00001d031813,Zm00001d014840,Zm00001d024752,Zm00001d024138,Zm00001d051166,Zm00001d014842	14	Zm00001d036206,Zm00001d009373,Zm00001d026392,Zm00001d040084,Zm00001d053897,Novel01090,Zm00001d012159,Zm00001d023437,Zm00001d015372,Zm00001d017416,Zm00001d050944,Zm00001d051194,Zm00001d031934,Zm00001d032992
GO:0051338	regulation of transferase activity	biological_process	0.72657	1	2	783	86	26932	1	Zm00001d026360	1	Zm00001d050944
GO:0010393	galacturonan metabolic process	biological_process	0.72795	1	2	783	88	26932	0		2	Zm00001d017416,Zm00001d032992
GO:0045488	pectin metabolic process	biological_process	0.72795	1	2	783	88	26932	0		2	Zm00001d017416,Zm00001d032992
GO:0018212	peptidyl-tyrosine modification	biological_process	0.73138	1	1	783	46	26932	0		1	Zm00001d024744
GO:0031399	regulation of protein modification process	biological_process	0.73148	1	2	783	87	26932	1	Zm00001d026360	1	Zm00001d050944
GO:0006221	pyrimidine nucleotide biosynthetic process	biological_process	0.73152	1	1	783	45	26932	0		1	Zm00001d035916
GO:0030001	metal ion transport	biological_process	0.73313	1	7	783	296	26932	2	Zm00001d016577,Zm00001d041308	5	Zm00001d042225,Zm00001d016691,Zm00001d053446,Zm00001d033446,Zm00001d033067
GO:0019842	vitamin binding	molecular_function	0.7332	1	1	783	45	26932	1	Novel00672	0
GO:0051346	negative regulation of hydrolase activity	biological_process	0.73328	1	2	783	84	26932	1	Zm00001d037969	1	Zm00001d042867
GO:0006006	glucose metabolic process	biological_process	0.7337	1	1	783	44	26932	1	Zm00001d025288	0
GO:0008236	serine-type peptidase activity	molecular_function	0.73539	1	6	783	251	26932	3	Novel00755,Zm00001d047634,Zm00001d002678	3	Zm00001d021283,Zm00001d021231,Zm00001d026521
GO:0017171	serine hydrolase activity	molecular_function	0.73539	1	6	783	251	26932	3	Novel00755,Zm00001d047634,Zm00001d002678	3	Zm00001d021283,Zm00001d021231,Zm00001d026521
GO:0034762	regulation of transmembrane transport	biological_process	0.73545	1	1	783	49	26932	0		1	Zm00001d053446
GO:0034765	regulation of ion transmembrane transport	biological_process	0.73545	1	1	783	49	26932	0		1	Zm00001d053446
GO:0034613	cellular protein localization	biological_process	0.73577	1	8	783	340	26932	3	Zm00001d042044,Zm00001d013114,Zm00001d008345	5	Zm00001d002458,Zm00001d016060,Zm00001d023840,Zm00001d012897,Zm00001d011328
GO:0045087	innate immune response	biological_process	0.73747	1	1	783	48	26932	1	Zm00001d028165	0
GO:0005216	ion channel activity	molecular_function	0.73796	1	2	783	98	26932	1	Zm00001d018332	1	Zm00001d053446
GO:0070727	cellular macromolecule localization	biological_process	0.73803	1	8	783	341	26932	3	Zm00001d042044,Zm00001d013114,Zm00001d008345	5	Zm00001d016060,Zm00001d002458,Zm00001d023840,Zm00001d012897,Zm00001d011328
GO:0006261	DNA-dependent DNA replication	biological_process	0.73866	1	1	783	47	26932	1	Zm00001d014885	0
GO:0006220	pyrimidine nucleotide metabolic process	biological_process	0.73981	1	1	783	46	26932	0		1	Zm00001d035916
GO:0007049	cell cycle	biological_process	0.74094	1	5	783	218	26932	3	Novel01047,Zm00001d014885,Zm00001d026360	2	Novel01090,Zm00001d050944
GO:0010558	negative regulation of macromolecule biosynthetic process	biological_process	0.74387	1	1	783	47	26932	1	Zm00001d014885	0
GO:0051604	protein maturation	biological_process	0.74453	1	1	783	47	26932	0		1	Zm00001d051850
GO:0033365	protein localization to organelle	biological_process	0.74556	1	2	783	92	26932	2	Zm00001d008345,Zm00001d042044	0
GO:0008173	RNA methyltransferase activity	molecular_function	0.74677	1	1	783	48	26932	1	Zm00001d037860	0
GO:0032870	cellular response to hormone stimulus	biological_process	0.74867	1	4	783	181	26932	1	Zm00001d012335	3	Zm00001d016277,Zm00001d042345,Zm00001d015212
GO:0009890	negative regulation of biosynthetic process	biological_process	0.75148	1	1	783	48	26932	1	Zm00001d014885	0
GO:0031327	negative regulation of cellular biosynthetic process	biological_process	0.75148	1	1	783	48	26932	1	Zm00001d014885	0
GO:0071495	cellular response to endogenous stimulus	biological_process	0.7525	1	4	783	182	26932	1	Zm00001d012335	3	Zm00001d016277,Zm00001d042345,Zm00001d015212
GO:0018298	protein-chromophore linkage	biological_process	0.75342	1	1	783	47	26932	1	Novel01559	0
GO:0016811	hydrolase activity, acting on carbon-nitrogen (but not peptide) bonds, in linear amides	molecular_function	0.75489	1	1	783	48	26932	1	Zm00001d015870	0
GO:0071704	organic substance metabolic process	biological_process	0.75551	1	304	783	10894	26932	143	Zm00001d029940,Zm00001d038522,Zm00001d016963,Zm00001d015032,Zm00001d014840,Zm00001d048561,Zm00001d049743,Zm00001d052564,Zm00001d019475,Zm00001d032046,Zm00001d017130,Zm00001d043663,Zm00001d008370,Zm00001d024768,Zm00001d037860,Zm00001d020437,Zm00001d016714,Zm00001d052952,Zm00001d043512,Zm00001d015344,Novel01559,Zm00001d032069,Zm00001d009619,Zm00001d039531,Zm00001d027271,Zm00001d026447,Zm00001d00863…	161	Zm00001d029722,Zm00001d051608,Zm00001d045261,Zm00001d051634,Novel01087,Zm00001d021268,Zm00001d031685,Novel01406,Zm00001d040084,Zm00001d039077,Zm00001d014292,Zm00001d021050,GRMZM5G815453,Zm00001d015008,Zm00001d052034,Zm00001d016660,Zm00001d012128,Zm00001d049966,Zm00001d045320,Novel00326,Zm00001d033649,Zm00001d013126,Zm00001d050635,Novel00159,Zm00001d041453,Zm00001d027233,Zm00001d030551,Zm00001d010…
GO:0051287	NAD binding	molecular_function	0.7566	1	2	783	91	26932	2	Zm00001d014919,Zm00001d046923	0
GO:0001932	regulation of protein phosphorylation	biological_process	0.7567	1	1	783	47	26932	1	Zm00001d026360	0
GO:0045859	regulation of protein kinase activity	biological_process	0.7567	1	1	783	47	26932	1	Zm00001d026360	0
GO:0030599	pectinesterase activity	molecular_function	0.75725	1	1	783	46	26932	0		1	Zm00001d032992
GO:0045330	aspartyl esterase activity	molecular_function	0.75725	1	1	783	46	26932	0		1	Zm00001d032992
GO:0000785	chromatin	cellular_component	0.75814	1	3	783	131	26932	3	Zm00001d021422,Zm00001d034479,Zm00001d019045	0
GO:0018022	peptidyl-lysine methylation	biological_process	0.75871	1	1	783	51	26932	1	Zm00001d020437	0
GO:0072657	protein localization to membrane	biological_process	0.75968	1	1	783	48	26932	1	Zm00001d042044	0
GO:0090150	establishment of protein localization to membrane	biological_process	0.75968	1	1	783	48	26932	1	Zm00001d042044	0
GO:0048285	organelle fission	biological_process	0.76189	1	2	783	97	26932	0		2	Novel01090,Zm00001d050944
GO:0055086	nucleobase-containing small molecule metabolic process	biological_process	0.76539	1	11	783	450	26932	3	Zm00001d026685,Zm00001d010375,Zm00001d024138	8	Zm00001d051634,Zm00001d036206,Zm00001d035916,Zm00001d040084,Novel00848,Zm00001d015008,Novel00789,Zm00001d014772
GO:0000428	DNA-directed RNA polymerase complex	cellular_component	0.76681	1	1	783	51	26932	1	Zm00001d043325	0
GO:0030880	RNA polymerase complex	cellular_component	0.76681	1	1	783	51	26932	1	Zm00001d043325	0
GO:0006955	immune response	biological_process	0.76841	1	1	783	52	26932	1	Zm00001d028165	0
GO:0042546	cell wall biogenesis	biological_process	0.76916	1	2	783	92	26932	0		2	Zm00001d047276,Zm00001d024071
GO:0043269	regulation of ion transport	biological_process	0.76934	1	1	783	54	26932	0		1	Zm00001d053446
GO:0031328	positive regulation of cellular biosynthetic process	biological_process	0.76952	1	2	783	94	26932	2	Zm00001d016714,Zm00001d043325	0
GO:0042545	cell wall modification	biological_process	0.7698	1	1	783	48	26932	0		1	Zm00001d032992
GO:0022607	cellular component assembly	biological_process	0.77127	1	9	783	375	26932	6	Zm00001d017751,Zm00001d052902,Zm00001d038851,Zm00001d027919,Zm00001d034479,Zm00001d021422	3	Novel01812,Novel01469,Zm00001d047276
GO:0097367	carbohydrate derivative binding	molecular_function	0.77245	1	90	783	3499	26932	43	Zm00001d021647,Zm00001d021176,Zm00001d053876,Zm00001d042044,Zm00001d017720,Zm00001d025255,Novel01296,Zm00001d014649,Zm00001d048635,Zm00001d021638,Zm00001d014840,Zm00001d006596,Zm00001d015032,Zm00001d038522,Zm00001d021962,Zm00001d020811,Zm00001d002937,Zm00001d009473,Zm00001d011315,Zm00001d026489,Zm00001d016832,Zm00001d052906,Zm00001d051323,Zm00001d029390,Zm00001d009936,Zm00001d026685,Zm00001d04229…	47	Zm00001d032480,Zm00001d031503,Zm00001d026669,Zm00001d031685,Zm00001d010159,Zm00001d003690,Zm00001d013445,Zm00001d023840,Zm00001d013013,Zm00001d051608,Zm00001d041298,Zm00001d010321,Zm00001d043252,Zm00001d013276,Zm00001d016396,Zm00001d026421,Zm00001d011006,Zm00001d016794,Zm00001d051252,Zm00001d015212,Zm00001d051424,Zm00001d037811,Zm00001d050466,Zm00001d015221,Zm00001d030551,Zm00001d011328,Zm00001d0…
GO:0009891	positive regulation of biosynthetic process	biological_process	0.77388	1	2	783	95	26932	2	Zm00001d043325,Zm00001d016714	0
GO:0015935	small ribosomal subunit	cellular_component	0.77471	1	1	783	48	26932	1	Zm00001d027919	0
GO:0016879	ligase activity, forming carbon-nitrogen bonds	molecular_function	0.77548	1	2	783	99	26932	2	Zm00001d026685,Zm00001d015344	0
GO:0071555	cell wall organization	biological_process	0.77612	1	7	783	301	26932	2	Zm00001d035494,Zm00001d015256	5	Zm00001d047276,Zm00001d032992,Zm00001d024071,Zm00001d035899,Zm00001d046127
GO:0004871	signal transducer activity	molecular_function	0.77827	1	2	783	107	26932	2	Zm00001d018332,Novel01047	0
GO:1902580	single-organism cellular localization	biological_process	0.77844	1	2	783	100	26932	2	Zm00001d042044,Zm00001d008345	0
GO:0005840	ribosome	cellular_component	0.77971	1	19	783	725	26932	15	Zm00001d027271,Zm00001d002490,Zm00001d011596,Zm00001d036129,Zm00001d034724,Zm00001d003411,Zm00001d046129,Zm00001d015204,Zm00001d019898,Zm00001d018096,Zm00001d030114,Zm00001d005030,Zm00001d027919,Zm00001d047581,Zm00001d038975	4	Zm00001d024029,Novel00549,Zm00001d045876,Novel00972
GO:0046983	protein dimerization activity	molecular_function	0.78053	1	18	783	704	26932	12	Zm00001d017187,Zm00001d021422,Zm00001d038612,Zm00001d047192,Zm00001d048087,Zm00001d029359,Zm00001d008853,Novel01559,Zm00001d019045,Novel00020,Zm00001d024839,Zm00001d020705	6	Zm00001d026097,Zm00001d027987,Zm00001d049541,Zm00001d053895,Zm00001d049179,Novel01139
GO:0005774	vacuolar membrane	cellular_component	0.78111	1	2	783	100	26932	0		2	Zm00001d051362,Zm00001d014772
GO:0044437	vacuolar part	cellular_component	0.78111	1	2	783	100	26932	0		2	Zm00001d014772,Zm00001d051362
GO:0071897	DNA biosynthetic process	biological_process	0.7813	1	1	783	55	26932	0		1	Zm00001d014568
GO:0019899	enzyme binding	molecular_function	0.78164	1	1	783	58	26932	1	Zm00001d026360	0
GO:0005244	voltage-gated ion channel activity	molecular_function	0.7857	1	1	783	56	26932	0		1	Zm00001d053446
GO:0022832	voltage-gated channel activity	molecular_function	0.7857	1	1	783	56	26932	0		1	Zm00001d053446
GO:0030529	ribonucleoprotein complex	cellular_component	0.78805	1	24	783	916	26932	19	Zm00001d047581,Zm00001d018882,Zm00001d013489,Zm00001d038975,Zm00001d027919,Zm00001d005030,Zm00001d030114,Zm00001d018096,Zm00001d052952,Zm00001d019898,Zm00001d034724,Zm00001d003411,Zm00001d015204,Zm00001d046129,Zm00001d002483,Zm00001d011596,Zm00001d036129,Zm00001d027271,Zm00001d002490	5	Novel00972,Novel00549,Zm00001d045876,Zm00001d026392,Zm00001d024029
GO:1902494	catalytic complex	cellular_component	0.78806	1	8	783	351	26932	2	Zm00001d043325,Novel00087	6	Zm00001d016864,Zm00001d044566,Zm00001d014772,Zm00001d050944,Novel01090,Zm00001d005695
GO:0006397	mRNA processing	biological_process	0.78829	1	3	783	148	26932	2	Novel00029,Zm00001d017751	1	Zm00001d026392
GO:0042398	cellular modified amino acid biosynthetic process	biological_process	0.78858	1	1	783	52	26932	1	Zm00001d026531	0
GO:0072593	reactive oxygen species metabolic process	biological_process	0.78965	1	4	783	178	26932	3	Zm00001d054044,Zm00001d040705,Zm00001d024752	1	Zm00001d009373
GO:0051049	regulation of transport	biological_process	0.78992	1	1	783	57	26932	0		1	Zm00001d053446
GO:0006486	protein glycosylation	biological_process	0.7906	1	2	783	101	26932	1	Zm00001d012335	1	Zm00001d013052
GO:0043413	macromolecule glycosylation	biological_process	0.7906	1	2	783	101	26932	1	Zm00001d012335	1	Zm00001d013052
GO:0030554	adenyl nucleotide binding	molecular_function	0.79147	1	78	783	3090	26932	37	Zm00001d020811,Zm00001d002937,Zm00001d009473,Zm00001d011315,Zm00001d026489,Zm00001d052906,Zm00001d051323,Zm00001d029390,Zm00001d021176,Zm00001d021647,Zm00001d053876,Zm00001d017720,Zm00001d025255,Zm00001d048635,Novel01296,Zm00001d014649,Zm00001d021638,Zm00001d015032,Zm00001d038522,Zm00001d021962,Zm00001d045544,Zm00001d000399,Zm00001d018665,Zm00001d017187,Zm00001d008477,Zm00001d010375,Zm00001d02601…	41	Zm00001d011006,Zm00001d016794,Zm00001d051252,Zm00001d037811,Zm00001d051424,Zm00001d015212,Zm00001d050466,Zm00001d015221,Zm00001d032480,Zm00001d031685,Zm00001d010159,Zm00001d031503,Zm00001d023840,Zm00001d013013,Zm00001d003690,Zm00001d051608,Zm00001d041298,Zm00001d010321,Zm00001d016396,Zm00001d013276,Zm00001d043252,Zm00001d033907,Zm00001d035916,Zm00001d020058,Zm00001d016242,Zm00001d013606,Zm00001d0…
GO:0019867	outer membrane	cellular_component	0.79162	1	1	783	53	26932	0		1	Novel00092
GO:0051172	negative regulation of nitrogen compound metabolic process	biological_process	0.79185	1	1	783	55	26932	1	Zm00001d014885	0
GO:0002376	immune system process	biological_process	0.79211	1	1	783	56	26932	1	Zm00001d028165	0
GO:0003887	DNA-directed DNA polymerase activity	molecular_function	0.79328	1	1	783	56	26932	0		1	Zm00001d014568
GO:0044433	cytoplasmic vesicle part	cellular_component	0.79555	1	1	783	59	26932	1	Novel00001	0
GO:0001510	RNA methylation	biological_process	0.80001	1	1	783	56	26932	1	Zm00001d037860	0
GO:0016298	lipase activity	molecular_function	0.80194	1	1	783	57	26932	0		1	Zm00001d011477
GO:0032879	regulation of localization	biological_process	0.80269	1	1	783	59	26932	0		1	Zm00001d053446
GO:0060089	molecular transducer activity	molecular_function	0.80269	1	2	783	112	26932	2	Zm00001d018332,Novel01047	0
GO:0045229	external encapsulating structure organization	biological_process	0.80366	1	7	783	311	26932	2	Zm00001d035494,Zm00001d015256	5	Zm00001d047276,Zm00001d046127,Zm00001d024071,Zm00001d035899,Zm00001d032992
GO:0005524	ATP binding	molecular_function	0.80448	1	74	783	2941	26932	33	Zm00001d029390,Zm00001d051323,Zm00001d052906,Zm00001d011315,Zm00001d026489,Zm00001d009473,Zm00001d002937,Zm00001d020811,Zm00001d038522,Zm00001d021962,Zm00001d021638,Zm00001d015032,Novel01296,Zm00001d017720,Zm00001d025255,Zm00001d053876,Zm00001d021647,Zm00001d015037,Zm00001d026018,Zm00001d010375,Zm00001d008477,Zm00001d000399,Zm00001d045544,Zm00001d018665,Zm00001d028613,Zm00001d032069,Zm00001d04351…	41	Zm00001d015221,Zm00001d050466,Zm00001d051424,Zm00001d037811,Zm00001d015212,Zm00001d051252,Zm00001d016794,Zm00001d011006,Zm00001d016396,Zm00001d013276,Zm00001d043252,Zm00001d041298,Zm00001d010321,Zm00001d051608,Zm00001d023840,Zm00001d013013,Zm00001d003690,Zm00001d031685,Zm00001d010159,Zm00001d031503,Zm00001d032480,Zm00001d041814,Zm00001d021684,Zm00001d036206,Zm00001d053761,Zm00001d024744,Zm00001d0…
GO:0006099	tricarboxylic acid cycle	biological_process	0.80502	1	1	783	56	26932	0		1	Zm00001d025690
GO:0006101	citrate metabolic process	biological_process	0.80502	1	1	783	56	26932	0		1	Zm00001d025690
GO:0030312	external encapsulating structure	cellular_component	0.80549	1	4	783	183	26932	1	Zm00001d028338	3	Zm00001d032992,Zm00001d024071,Novel01469
GO:0036094	small molecule binding	molecular_function	0.80683	1	100	783	3894	26932	51	Zm00001d026489,Zm00001d011315,Zm00001d008427,Zm00001d009473,Zm00001d002937,Zm00001d020811,Zm00001d037005,Zm00001d029390,Zm00001d051323,Zm00001d016832,Zm00001d052906,Zm00001d032046,Zm00001d053876,Zm00001d021176,Zm00001d021647,Zm00001d021962,Zm00001d038522,Zm00001d006596,Zm00001d025288,Zm00001d015032,Zm00001d021638,Zm00001d048635,Novel01296,Zm00001d014649,Zm00001d025255,Zm00001d017720,Zm00001d04204…	49	Zm00001d051252,Zm00001d011006,Zm00001d026421,Zm00001d016794,Zm00001d025545,Zm00001d015221,Zm00001d050466,Zm00001d051424,Zm00001d037811,Zm00001d015212,Zm00001d017598,Zm00001d013013,Zm00001d023840,Zm00001d003690,Zm00001d010159,Zm00001d031685,Zm00001d031503,Zm00001d026669,Zm00001d032480,Zm00001d013276,Zm00001d016396,Zm00001d043252,Zm00001d041298,Zm00001d010321,Zm00001d051608,Zm00001d016242,Zm00001d0…
GO:0008033	tRNA processing	biological_process	0.80737	1	2	783	105	26932	1	Zm00001d037860	1	Zm00001d051608
GO:0009893	positive regulation of metabolic process	biological_process	0.80821	1	5	783	237	26932	3	Zm00001d007340,Zm00001d043325,Zm00001d016714	2	Zm00001d021087,Zm00001d017755
GO:0000166	nucleotide binding	molecular_function	0.80823	1	97	783	3788	26932	49	Zm00001d026489,Zm00001d011315,Zm00001d009473,Zm00001d008427,Zm00001d002937,Zm00001d020811,Zm00001d037005,Zm00001d029390,Zm00001d051323,Zm00001d016832,Zm00001d052906,Zm00001d032046,Zm00001d053876,Zm00001d021647,Zm00001d021176,Zm00001d021962,Zm00001d038522,Zm00001d006596,Zm00001d025288,Zm00001d015032,Zm00001d021638,Zm00001d014649,Novel01296,Zm00001d048635,Zm00001d042044,Zm00001d025255,Zm00001d01772…	48	Zm00001d051252,Zm00001d011006,Zm00001d016794,Zm00001d025545,Zm00001d015221,Zm00001d050466,Zm00001d015212,Zm00001d037811,Zm00001d051424,Zm00001d003690,Zm00001d017598,Zm00001d013013,Zm00001d023840,Zm00001d031503,Zm00001d026669,Zm00001d010159,Zm00001d031685,Zm00001d032480,Zm00001d043252,Zm00001d016396,Zm00001d013276,Zm00001d010321,Zm00001d041298,Zm00001d051608,Zm00001d013606,Zm00001d016242,Zm00001d0…
GO:1901265	nucleoside phosphate binding	molecular_function	0.80823	1	97	783	3788	26932	49	Zm00001d006596,Zm00001d025288,Zm00001d015032,Zm00001d021638,Zm00001d038522,Zm00001d021962,Zm00001d025255,Zm00001d017720,Zm00001d042044,Zm00001d048635,Novel01296,Zm00001d014649,Zm00001d021176,Zm00001d021647,Zm00001d032046,Zm00001d053876,Zm00001d029390,Zm00001d037005,Zm00001d052906,Zm00001d016832,Zm00001d051323,Zm00001d008427,Zm00001d009473,Zm00001d011315,Zm00001d026489,Zm00001d020811,Zm00001d00293…	48	Zm00001d041298,Zm00001d010321,Zm00001d016396,Zm00001d013276,Zm00001d043252,Zm00001d051608,Zm00001d010159,Zm00001d031685,Zm00001d031503,Zm00001d026669,Zm00001d017598,Zm00001d013013,Zm00001d023840,Zm00001d003690,Zm00001d032480,Zm00001d050466,Zm00001d015221,Zm00001d037811,Zm00001d051424,Zm00001d015212,Zm00001d011006,Zm00001d016794,Zm00001d051252,Zm00001d025545,Zm00001d031241,Zm00001d026139,Zm00001d0…
GO:0044763	single-organism cellular process	biological_process	0.80827	1	145	783	5473	26932	55	Zm00001d032131,Zm00001d015037,Zm00001d025333,Zm00001d046923,Zm00001d026531,Zm00001d010375,Zm00001d003913,Zm00001d051166,Zm00001d051851,Zm00001d043325,Zm00001d027271,Zm00001d024752,Zm00001d040705,Zm00001d041308,Zm00001d016714,Zm00001d008427,Zm00001d015747,Zm00001d002937,Zm00001d000196,Zm00001d054044,Zm00001d012335,Zm00001d008370,Zm00001d026360,Zm00001d048561,Zm00001d042692,Zm00001d016963,Zm00001d0…	90	Zm00001d013052,Zm00001d033493,Zm00001d042345,Novel00848,Zm00001d016864,Zm00001d033067,Zm00001d033907,Zm00001d023869,Zm00001d034208,Zm00001d009373,Zm00001d038291,Zm00001d035629,Zm00001d027233,Zm00001d045759,Zm00001d016277,Zm00001d020488,Zm00001d023873,Zm00001d046127,Zm00001d012128,Zm00001d044566,Zm00001d003522,Zm00001d022557,Zm00001d028164,Zm00001d015008,Zm00001d006697,Zm00001d040627,Zm00001d05203…
GO:0010410	hemicellulose metabolic process	biological_process	0.80918	1	1	783	53	26932	0		1	Zm00001d024071
GO:1901700	response to oxygen-containing compound	biological_process	0.81037	1	4	783	193	26932	2	Zm00001d028165,Zm00001d017130	2	Zm00001d015212,Zm00001d012929
GO:0009100	glycoprotein metabolic process	biological_process	0.81048	1	2	783	106	26932	1	Zm00001d012335	1	Zm00001d013052
GO:0009101	glycoprotein biosynthetic process	biological_process	0.81048	1	2	783	106	26932	1	Zm00001d012335	1	Zm00001d013052
GO:0009060	aerobic respiration	biological_process	0.81104	1	1	783	57	26932	0		1	Zm00001d025690
GO:0004518	nuclease activity	molecular_function	0.81245	1	4	783	198	26932	2	Zm00001d039451,Zm00001d017751	2	Zm00001d022630,Zm00001d016801
GO:0006081	cellular aldehyde metabolic process	biological_process	0.81318	1	1	783	55	26932	1	Zm00001d017418	0
GO:0044272	sulfur compound biosynthetic process	biological_process	0.81385	1	2	783	104	26932	2	Novel00672,Zm00001d013644	0
GO:0009522	photosystem I	cellular_component	0.81424	1	1	783	54	26932	0		1	Novel01204
GO:0034061	DNA polymerase activity	molecular_function	0.81552	1	1	783	60	26932	0		1	Zm00001d014568
GO:0032559	adenyl ribonucleotide binding	molecular_function	0.81675	1	77	783	3082	26932	36	Zm00001d029390,Zm00001d052906,Zm00001d051323,Zm00001d009473,Zm00001d011315,Zm00001d026489,Zm00001d020811,Zm00001d002937,Zm00001d021638,Zm00001d015032,Zm00001d021962,Zm00001d038522,Zm00001d017720,Zm00001d025255,Zm00001d048635,Zm00001d014649,Novel01296,Zm00001d021176,Zm00001d021647,Zm00001d053876,Zm00001d026018,Zm00001d015037,Zm00001d010375,Zm00001d008477,Zm00001d045544,Zm00001d018665,Zm00001d00039…	41	Zm00001d050466,Zm00001d015221,Zm00001d037811,Zm00001d051424,Zm00001d015212,Zm00001d011006,Zm00001d016794,Zm00001d051252,Zm00001d010321,Zm00001d041298,Zm00001d016396,Zm00001d013276,Zm00001d043252,Zm00001d051608,Zm00001d031685,Zm00001d010159,Zm00001d031503,Zm00001d023840,Zm00001d013013,Zm00001d003690,Zm00001d032480,Zm00001d021684,Zm00001d041814,Zm00001d024744,Zm00001d036206,Zm00001d053761,Zm00001d0…
GO:0016874	ligase activity	molecular_function	0.8182	1	11	783	490	26932	7	Zm00001d015344,Zm00001d026255,Zm00001d026685,Zm00001d017653,Zm00001d021962,Zm00001d015037,Zm00001d028616	4	Zm00001d051608,Zm00001d031685,Zm00001d031241,Zm00001d013013
GO:0070838	divalent metal ion transport	biological_process	0.81895	1	1	783	61	26932	0		1	Zm00001d033446
GO:0022402	cell cycle process	biological_process	0.81959	1	3	783	157	26932	1	Novel01047	2	Novel01090,Zm00001d050944
GO:0080134	regulation of response to stress	biological_process	0.82039	1	1	783	58	26932	0		1	Zm00001d026139
GO:0016579	protein deubiquitination	biological_process	0.82216	1	1	783	65	26932	0		1	Zm00001d031241
GO:0010383	cell wall polysaccharide metabolic process	biological_process	0.82389	1	1	783	56	26932	0		1	Zm00001d024071
GO:0072509	divalent inorganic cation transmembrane transporter activity	molecular_function	0.82465	1	1	783	62	26932	0		1	Zm00001d033446
GO:0005886	plasma membrane	cellular_component	0.82503	1	8	783	369	26932	3	Zm00001d051174,Zm00001d003913,Novel01880	5	Zm00001d010440,Zm00001d048583,Zm00001d023673,Zm00001d041067,Zm00001d044566
GO:1990234	transferase complex	cellular_component	0.82558	1	4	783	204	26932	1	Zm00001d043325	3	Zm00001d050944,Zm00001d044566,Novel01090
GO:0030244	cellulose biosynthetic process	biological_process	0.827	1	1	783	66	26932	0		1	Zm00001d046127
GO:0032549	ribonucleoside binding	molecular_function	0.82982	1	86	783	3422	26932	40	Zm00001d053876,Zm00001d021647,Zm00001d021176,Zm00001d038522,Zm00001d021962,Zm00001d021638,Zm00001d006596,Zm00001d015032,Novel01296,Zm00001d014649,Zm00001d048635,Zm00001d042044,Zm00001d017720,Zm00001d025255,Zm00001d026489,Zm00001d011315,Zm00001d009473,Zm00001d002937,Zm00001d020811,Zm00001d029390,Zm00001d051323,Zm00001d016832,Zm00001d052906,Zm00001d008632,Zm00001d052809,Zm00001d035937,Zm00001d02668…	46	Zm00001d003690,Zm00001d023840,Zm00001d013013,Zm00001d031503,Zm00001d026669,Zm00001d031685,Zm00001d010159,Zm00001d032480,Zm00001d043252,Zm00001d016396,Zm00001d013276,Zm00001d041298,Zm00001d010321,Zm00001d051608,Zm00001d051252,Zm00001d011006,Zm00001d016794,Zm00001d026421,Zm00001d015221,Zm00001d050466,Zm00001d015212,Zm00001d051424,Zm00001d037811,Zm00001d011328,Zm00001d030551,Zm00001d050074,Zm00001d0…
GO:0072511	divalent inorganic cation transport	biological_process	0.82996	1	1	783	63	26932	0		1	Zm00001d033446
GO:0017076	purine nucleotide binding	molecular_function	0.83002	1	86	783	3420	26932	41	Zm00001d003212,Zm00001d043512,Zm00001d014278,Zm00001d032069,Zm00001d028613,Zm00001d035937,Zm00001d042293,Zm00001d026685,Zm00001d008632,Zm00001d052809,Zm00001d010375,Zm00001d015037,Zm00001d026018,Zm00001d045544,Zm00001d000399,Zm00001d018665,Zm00001d017187,Zm00001d008477,Zm00001d048635,Novel01296,Zm00001d014649,Zm00001d025255,Zm00001d017720,Zm00001d042044,Zm00001d021962,Zm00001d038522,Zm00001d01503…	45	Zm00001d025660,Zm00001d034555,Zm00001d011459,Zm00001d012929,Zm00001d045759,Zm00001d053897,Zm00001d050074,Zm00001d031241,Zm00001d026139,Zm00001d026677,Zm00001d030551,Zm00001d011328,Zm00001d036206,Zm00001d053761,Zm00001d024744,Zm00001d041814,Zm00001d048393,Zm00001d021684,Zm00001d035916,Zm00001d033907,Zm00001d016242,Zm00001d013606,Zm00001d020058,Zm00001d051608,Zm00001d013276,Zm00001d016396,Zm00001d0…
GO:0001882	nucleoside binding	molecular_function	0.83044	1	86	783	3423	26932	40	Zm00001d010375,Zm00001d026018,Zm00001d015037,Zm00001d045544,Zm00001d000399,Zm00001d018665,Zm00001d008477,Zm00001d014278,Zm00001d043512,Zm00001d003212,Zm00001d028613,Zm00001d032069,Zm00001d026685,Zm00001d042293,Zm00001d035937,Zm00001d052809,Zm00001d008632,Zm00001d052906,Zm00001d016832,Zm00001d051323,Zm00001d029390,Zm00001d020811,Zm00001d002937,Zm00001d009473,Zm00001d011315,Zm00001d026489,Zm00001d0…	46	Zm00001d024744,Zm00001d053761,Zm00001d036206,Zm00001d021684,Zm00001d048393,Zm00001d041814,Zm00001d033907,Zm00001d035916,Zm00001d020058,Zm00001d013606,Zm00001d016242,Zm00001d012929,Zm00001d011459,Zm00001d025660,Zm00001d034555,Zm00001d026677,Zm00001d026139,Zm00001d031241,Zm00001d050074,Zm00001d045759,Zm00001d053897,Zm00001d030551,Zm00001d011328,Zm00001d015212,Zm00001d037811,Zm00001d051424,Zm00001d0…
GO:0043086	negative regulation of catalytic activity	biological_process	0.83267	1	4	783	189	26932	1	Zm00001d037969	3	Zm00001d050944,Zm00001d042867,Zm00001d016740
GO:0034470	ncRNA processing	biological_process	0.83286	1	4	783	202	26932	3	Zm00001d002483,Zm00001d037860,Zm00001d052952	1	Zm00001d051608
GO:0044444	cytoplasmic part	cellular_component	0.83511	1	80	783	3011	26932	44	Zm00001d028338,Zm00001d050462,Zm00001d030114,Zm00001d004978,Zm00001d035494,Novel00087,Zm00001d015256,Zm00001d054015,Zm00001d021962,Zm00001d047581,Zm00001d008623,Zm00001d005030,Zm00001d019898,Zm00001d046129,Zm00001d016714,Zm00001d020437,Zm00001d037860,Zm00001d034887,Zm00001d015747,Zm00001d038606,Zm00001d034724,Zm00001d018096,Zm00001d045144,Zm00001d027271,Zm00001d026685,Zm00001d036129,Zm00001d04332…	36	Zm00001d019479,Zm00001d052245,Zm00001d013013,Novel00092,Novel01317,Zm00001d045876,Novel00549,Zm00001d042600,Zm00001d051055,Zm00001d045261,Zm00001d051608,Novel01812,Zm00001d005695,Zm00001d014873,Zm00001d051362,Zm00001d024029,Zm00001d015431,Zm00001d046625,Zm00001d025545,Zm00001d020722,Zm00001d025170,GRMZM5G815453,Zm00001d014772,Zm00001d016850,Zm00001d038291,Zm00001d048583,Zm00001d016619,Zm00001d025…
GO:0006364	rRNA processing	biological_process	0.83601	1	2	783	111	26932	2	Zm00001d002483,Zm00001d052952	0
GO:0009734	auxin-activated signaling pathway	biological_process	0.83728	1	2	783	115	26932	0		2	Zm00001d016277,Zm00001d042345
GO:0071365	cellular response to auxin stimulus	biological_process	0.83728	1	2	783	115	26932	0		2	Zm00001d042345,Zm00001d016277
GO:0003723	RNA binding	molecular_function	0.83767	1	21	783	888	26932	15	Zm00001d036396,Zm00001d007890,Zm00001d047581,Zm00001d018882,Zm00001d015037,Zm00001d042888,Zm00001d007092,Zm00001d006596,Zm00001d011596,Zm00001d037860,Zm00001d002490,Zm00001d049743,Zm00001d012517,Zm00001d049821,Zm00001d052952	6	Zm00001d045320,Zm00001d015917,Zm00001d041389,Zm00001d037868,Zm00001d022630,Zm00001d014873
GO:0098772	molecular function regulator	molecular_function	0.83812	1	8	783	363	26932	3	Zm00001d017187,Zm00001d007340,Zm00001d037969	5	Zm00001d017755,Novel01815,Zm00001d016740,Zm00001d021087,Zm00001d042867
GO:0005856	cytoskeleton	cellular_component	0.83823	1	5	783	253	26932	1	Zm00001d032131	4	Zm00001d003690,Zm00001d013276,Novel01812,Zm00001d035629
GO:0014070	response to organic cyclic compound	biological_process	0.83836	1	1	783	65	26932	1	Zm00001d028165	0
GO:0071103	DNA conformation change	biological_process	0.83908	1	7	783	404	26932	4	Zm00001d038851,Zm00001d017720,Zm00001d034479,Zm00001d021422	3	Zm00001d027233,Zm00001d027245,Zm00001d015212
GO:0032268	regulation of cellular protein metabolic process	biological_process	0.83945	1	5	783	239	26932	2	Zm00001d026360,Zm00001d037969	3	Zm00001d050944,Zm00001d042867,Novel01090
GO:0003676	nucleic acid binding	molecular_function	0.83961	1	123	783	4570	26932	71	Zm00001d007092,Zm00001d019045,Zm00001d026016,Zm00001d042888,Zm00001d048991,Zm00001d016457,Zm00001d013419,Zm00001d015037,Zm00001d029325,Zm00001d014885,Zm00001d041886,Zm00001d049821,Zm00001d019734,Zm00001d026522,Zm00001d012141,Zm00001d015519,Zm00001d027530,Zm00001d002490,Zm00001d011596,Zm00001d038023,Zm00001d018882,Zm00001d013151,Zm00001d016552,Zm00001d036396,Zm00001d037607,Zm00001d026305,Zm00001d0…	52	Zm00001d039032,Zm00001d046947,Zm00001d041389,Zm00001d046751,Zm00001d014568,Zm00001d044857,Zm00001d038297,Zm00001d051788,Zm00001d031241,Zm00001d014580,Zm00001d051480,Zm00001d042463,Zm00001d008190,Zm00001d027431,Zm00001d012413,Zm00001d045320,Zm00001d016801,Novel01548,Zm00001d015917,Zm00001d053895,Novel00326,Zm00001d010634,Zm00001d049676,Zm00001d048527,Zm00001d026528,Zm00001d006835,Zm00001d028984,Zm…
GO:0044092	negative regulation of molecular function	biological_process	0.83971	1	4	783	192	26932	1	Zm00001d037969	3	Zm00001d042867,Zm00001d016740,Zm00001d050944
GO:0005829	cytosol	cellular_component	0.84002	1	5	783	246	26932	2	Zm00001d027919,Zm00001d026685	3	Zm00001d016850,Zm00001d046625,Zm00001d051608
GO:0035639	purine ribonucleoside triphosphate binding	molecular_function	0.8404	1	82	783	3270	26932	37	Zm00001d043512,Zm00001d003212,Zm00001d014278,Zm00001d028613,Zm00001d032069,Zm00001d035937,Zm00001d026685,Zm00001d042293,Zm00001d008632,Zm00001d052809,Zm00001d010375,Zm00001d015037,Zm00001d026018,Zm00001d045544,Zm00001d000399,Zm00001d018665,Zm00001d008477,Novel01296,Zm00001d042044,Zm00001d017720,Zm00001d025255,Zm00001d038522,Zm00001d021962,Zm00001d021638,Zm00001d006596,Zm00001d015032,Zm00001d05387…	45	Zm00001d012929,Zm00001d011459,Zm00001d025660,Zm00001d034555,Zm00001d050074,Zm00001d045759,Zm00001d053897,Zm00001d026677,Zm00001d026139,Zm00001d031241,Zm00001d030551,Zm00001d011328,Zm00001d053761,Zm00001d036206,Zm00001d024744,Zm00001d048393,Zm00001d041814,Zm00001d021684,Zm00001d035916,Zm00001d033907,Zm00001d013606,Zm00001d016242,Zm00001d020058,Zm00001d051608,Zm00001d043252,Zm00001d016396,Zm00001d0…
GO:0016072	rRNA metabolic process	biological_process	0.84139	1	2	783	113	26932	2	Zm00001d052952,Zm00001d002483	0
GO:0009793	embryo development ending in seed dormancy	biological_process	0.84148	1	1	783	65	26932	1	Zm00001d021962	0
GO:0008037	cell recognition	biological_process	0.84343	1	1	783	67	26932	0		1	Zm00001d043252
GO:0048544	recognition of pollen	biological_process	0.84343	1	1	783	67	26932	0		1	Zm00001d043252
GO:0009790	embryo development	biological_process	0.84424	1	1	783	66	26932	1	Zm00001d021962	0
GO:0043549	regulation of kinase activity	biological_process	0.84448	1	1	783	62	26932	1	Zm00001d026360	0
GO:0010605	negative regulation of macromolecule metabolic process	biological_process	0.84656	1	5	783	252	26932	3	Zm00001d014885,Zm00001d026300,Zm00001d037969	2	Zm00001d050944,Zm00001d042867
GO:0009875	pollen-pistil interaction	biological_process	0.84703	1	1	783	68	26932	0		1	Zm00001d043252
GO:0016779	nucleotidyltransferase activity	molecular_function	0.8488	1	6	783	298	26932	0		6	Zm00001d028572,Zm00001d026421,Zm00001d051608,Zm00001d014568,Zm00001d014674,Zm00001d015008
GO:0044265	cellular macromolecule catabolic process	biological_process	0.84909	1	5	783	256	26932	0		5	Novel01090,Zm00001d015372,Zm00001d050944,Zm00001d053897,Zm00001d026392
GO:0042325	regulation of phosphorylation	biological_process	0.84928	1	1	783	63	26932	1	Zm00001d026360	0
GO:0005576	extracellular region	cellular_component	0.84954	1	13	783	545	26932	5	Zm00001d016697,Zm00001d029558,Zm00001d024752,Zm00001d011069,Zm00001d040705	8	Novel01103,Novel01469,Zm00001d004753,Zm00001d004758,Zm00001d042867,Zm00001d035899,Zm00001d024071,Zm00001d009373
GO:0001883	purine nucleoside binding	molecular_function	0.8497	1	85	783	3410	26932	40	Zm00001d035937,Zm00001d026685,Zm00001d042293,Zm00001d008632,Zm00001d052809,Zm00001d003212,Zm00001d043512,Zm00001d014278,Zm00001d032069,Zm00001d028613,Zm00001d000399,Zm00001d045544,Zm00001d018665,Zm00001d008477,Zm00001d010375,Zm00001d015037,Zm00001d026018,Zm00001d053876,Zm00001d021647,Zm00001d021176,Novel01296,Zm00001d014649,Zm00001d048635,Zm00001d042044,Zm00001d025255,Zm00001d017720,Zm00001d02196…	45	Zm00001d030551,Zm00001d011328,Zm00001d012929,Zm00001d025660,Zm00001d034555,Zm00001d011459,Zm00001d050074,Zm00001d045759,Zm00001d053897,Zm00001d026677,Zm00001d031241,Zm00001d026139,Zm00001d035916,Zm00001d033907,Zm00001d013606,Zm00001d016242,Zm00001d020058,Zm00001d053761,Zm00001d036206,Zm00001d024744,Zm00001d048393,Zm00001d041814,Zm00001d021684,Zm00001d032480,Zm00001d003690,Zm00001d013013,Zm00001d0…
GO:0032550	purine ribonucleoside binding	molecular_function	0.8497	1	85	783	3410	26932	40	Zm00001d009473,Zm00001d026489,Zm00001d011315,Zm00001d020811,Zm00001d002937,Zm00001d029390,Zm00001d052906,Zm00001d016832,Zm00001d051323,Zm00001d021647,Zm00001d021176,Zm00001d053876,Zm00001d006596,Zm00001d015032,Zm00001d021638,Zm00001d021962,Zm00001d038522,Zm00001d042044,Zm00001d025255,Zm00001d017720,Novel01296,Zm00001d014649,Zm00001d048635,Zm00001d008477,Zm00001d045544,Zm00001d000399,Zm00001d01866…	45	Zm00001d011006,Zm00001d016794,Zm00001d051252,Zm00001d050466,Zm00001d015221,Zm00001d015212,Zm00001d051424,Zm00001d037811,Zm00001d031503,Zm00001d026669,Zm00001d010159,Zm00001d031685,Zm00001d003690,Zm00001d013013,Zm00001d023840,Zm00001d032480,Zm00001d041298,Zm00001d010321,Zm00001d043252,Zm00001d016396,Zm00001d013276,Zm00001d051608,Zm00001d020058,Zm00001d013606,Zm00001d016242,Zm00001d033907,Zm00001d0…
GO:0032555	purine ribonucleotide binding	molecular_function	0.8497	1	85	783	3410	26932	40	Zm00001d009473,Zm00001d011315,Zm00001d026489,Zm00001d020811,Zm00001d002937,Zm00001d029390,Zm00001d016832,Zm00001d052906,Zm00001d051323,Zm00001d021647,Zm00001d021176,Zm00001d053876,Zm00001d021638,Zm00001d006596,Zm00001d015032,Zm00001d038522,Zm00001d021962,Zm00001d042044,Zm00001d017720,Zm00001d025255,Zm00001d014649,Novel01296,Zm00001d048635,Zm00001d008477,Zm00001d018665,Zm00001d045544,Zm00001d00039…	45	Zm00001d016794,Zm00001d011006,Zm00001d051252,Zm00001d050466,Zm00001d015221,Zm00001d015212,Zm00001d037811,Zm00001d051424,Zm00001d026669,Zm00001d031503,Zm00001d031685,Zm00001d010159,Zm00001d003690,Zm00001d023840,Zm00001d013013,Zm00001d032480,Zm00001d041298,Zm00001d010321,Zm00001d043252,Zm00001d016396,Zm00001d013276,Zm00001d051608,Zm00001d020058,Zm00001d013606,Zm00001d016242,Zm00001d033907,Zm00001d0…
GO:0048513	organ development	biological_process	0.85087	1	2	783	122	26932	1	Zm00001d028165	1	Zm00001d053895
GO:0043604	amide biosynthetic process	biological_process	0.85203	1	26	783	1046	26932	14	Zm00001d006596,Zm00001d026531,Zm00001d007092,Zm00001d027919,Zm00001d021962,Zm00001d015037,Zm00001d005030,Zm00001d034724,Zm00001d015204,Zm00001d003411,Zm00001d018096,Zm00001d027271,Zm00001d011596,Zm00001d036129	12	Zm00001d031241,Novel00549,Zm00001d045876,Zm00001d049541,Novel00972,Zm00001d037868,Zm00001d041389,Zm00001d015917,Zm00001d045320,Zm00001d031685,Zm00001d014873,Zm00001d024029
GO:0044723	single-organism carbohydrate metabolic process	biological_process	0.85254	1	13	783	588	26932	4	Zm00001d012335,Zm00001d010375,Zm00001d025288,Zm00001d024138	9	Zm00001d044566,Zm00001d046127,Zm00001d045261,Zm00001d014292,Zm00001d036206,Zm00001d040084,Zm00001d019479,Zm00001d003817,Zm00001d013052
GO:0005777	peroxisome	cellular_component	0.8526	1	1	783	66	26932	0		1	Novel01317
GO:0042579	microbody	cellular_component	0.8526	1	1	783	66	26932	0		1	Novel01317
GO:0009664	plant-type cell wall organization	biological_process	0.85377	1	1	783	63	26932	0		1	Zm00001d047276
GO:0036459	ubiquitinyl hydrolase activity	molecular_function	0.85683	1	1	783	72	26932	0		1	Zm00001d031241
GO:0070646	protein modification by small protein removal	biological_process	0.857	1	1	783	72	26932	0		1	Zm00001d031241
GO:0007017	microtubule-based process	biological_process	0.85728	1	4	783	220	26932	2	Zm00001d029390,Zm00001d002937	2	Zm00001d045759,Zm00001d023840
GO:0030234	enzyme regulator activity	molecular_function	0.85766	1	7	783	328	26932	3	Zm00001d037969,Zm00001d007340,Zm00001d017187	4	Zm00001d042867,Zm00001d016740,Zm00001d021087,Novel01815
GO:0065008	regulation of biological quality	biological_process	0.85787	1	14	783	691	26932	5	Zm00001d032046,Zm00001d016714,Zm00001d051851,Zm00001d015747,Zm00001d016786	9	Novel01469,Zm00001d023869,Zm00001d052769,Zm00001d049541,Zm00001d027245,Zm00001d052034,Novel01812,Zm00001d023873,Zm00001d027233
GO:0034357	photosynthetic membrane	cellular_component	0.85803	1	4	783	200	26932	3	Zm00001d045144,Zm00001d049743,Zm00001d021245	1	Novel01204
GO:0051246	regulation of protein metabolic process	biological_process	0.85888	1	5	783	248	26932	2	Zm00001d037969,Zm00001d026360	3	Zm00001d042867,Novel01090,Zm00001d050944
GO:0048367	shoot system development	biological_process	0.85908	1	2	783	121	26932	1	Zm00001d028165	1	Zm00001d053895
GO:0022613	ribonucleoprotein complex biogenesis	biological_process	0.85948	1	4	783	208	26932	4	Zm00001d003618,Zm00001d002483,Zm00001d027919,Zm00001d052952	0
GO:0009534	chloroplast thylakoid	cellular_component	0.85956	1	3	783	158	26932	3	Zm00001d045144,Zm00001d004978,Zm00001d021245	0
GO:0031976	plastid thylakoid	cellular_component	0.85956	1	3	783	158	26932	3	Zm00001d004978,Zm00001d021245,Zm00001d045144	0
GO:0040007	growth	biological_process	0.86003	1	1	783	69	26932	0		1	Zm00001d047276
GO:0031090	organelle membrane	cellular_component	0.86108	1	14	783	627	26932	5	Novel00087,Zm00001d015256,Zm00001d008623,Zm00001d035494,Zm00001d016714	9	Zm00001d016864,Zm00001d015431,Zm00001d025660,Novel00092,Zm00001d051362,Zm00001d016619,Zm00001d014772,Zm00001d005695,Zm00001d048583
GO:0043603	cellular amide metabolic process	biological_process	0.86117	1	27	783	1093	26932	14	Zm00001d007092,Zm00001d027919,Zm00001d026531,Zm00001d006596,Zm00001d015037,Zm00001d021962,Zm00001d005030,Zm00001d034724,Zm00001d003411,Zm00001d015204,Zm00001d018096,Zm00001d027271,Zm00001d011596,Zm00001d036129	13	Novel00549,Zm00001d045876,Zm00001d031241,Zm00001d037868,Novel00972,Zm00001d049541,Zm00001d041389,Zm00001d045320,Zm00001d015917,Zm00001d014873,Zm00001d031685,Zm00001d024029,Zm00001d051850
GO:1902582	single-organism intracellular transport	biological_process	0.86619	1	4	783	218	26932	2	Zm00001d042044,Zm00001d008345	2	Zm00001d048583,Zm00001d016183
GO:0006511	ubiquitin-dependent protein catabolic process	biological_process	0.86745	1	3	783	173	26932	0		3	Zm00001d050944,Zm00001d053897,Novel01090
GO:0009908	flower development	biological_process	0.86813	1	1	783	71	26932	0		1	Zm00001d053895
GO:0009755	hormone-mediated signaling pathway	biological_process	0.86853	1	3	783	174	26932	1	Zm00001d012335	2	Zm00001d016277,Zm00001d042345
GO:0048193	Golgi vesicle transport	biological_process	0.87172	1	1	783	74	26932	0		1	Zm00001d016183
GO:0006412	translation	biological_process	0.87294	1	24	783	988	26932	13	Zm00001d005030,Zm00001d015037,Zm00001d021962,Zm00001d007092,Zm00001d027919,Zm00001d006596,Zm00001d011596,Zm00001d036129,Zm00001d027271,Zm00001d018096,Zm00001d034724,Zm00001d015204,Zm00001d003411	11	Zm00001d045320,Zm00001d015917,Zm00001d041389,Novel00972,Zm00001d037868,Novel00549,Zm00001d045876,Zm00001d031241,Zm00001d024029,Zm00001d014873,Zm00001d031685
GO:0019941	modification-dependent protein catabolic process	biological_process	0.87423	1	3	783	176	26932	0		3	Zm00001d050944,Zm00001d053897,Novel01090
GO:0050790	regulation of catalytic activity	biological_process	0.8745	1	9	783	422	26932	4	Zm00001d037969,Zm00001d017187,Zm00001d026360,Zm00001d007340	5	Zm00001d021087,Zm00001d016740,Zm00001d042867,Zm00001d050944,Zm00001d017755
GO:0006325	chromatin organization	biological_process	0.87467	1	3	783	178	26932	3	Zm00001d034479,Zm00001d021422,Zm00001d038851	0
GO:0043632	modification-dependent macromolecule catabolic process	biological_process	0.87673	1	3	783	177	26932	0		3	Novel01090,Zm00001d050944,Zm00001d053897
GO:0070008	serine-type exopeptidase activity	molecular_function	0.87683	1	1	783	69	26932	1	Zm00001d002678	0
GO:0044459	plasma membrane part	cellular_component	0.87713	1	1	783	75	26932	0		1	Zm00001d044566
GO:0046873	metal ion transmembrane transporter activity	molecular_function	0.87756	1	3	783	181	26932	0		3	Zm00001d053446,Zm00001d033446,Zm00001d033067
GO:0003743	translation initiation factor activity	molecular_function	0.87863	1	3	783	173	26932	0		3	Zm00001d015917,Zm00001d041389,Zm00001d014873
GO:0019953	sexual reproduction	biological_process	0.87944	1	1	783	68	26932	0		1	Novel01469
GO:0090567	reproductive shoot system development	biological_process	0.87948	1	1	783	74	26932	0		1	Zm00001d053895
GO:0032553	ribonucleotide binding	molecular_function	0.87976	1	85	783	3454	26932	40	Zm00001d026018,Zm00001d015037,Zm00001d010375,Zm00001d008477,Zm00001d045544,Zm00001d018665,Zm00001d000399,Zm00001d028613,Zm00001d032069,Zm00001d014278,Zm00001d043512,Zm00001d003212,Zm00001d052809,Zm00001d008632,Zm00001d026685,Zm00001d042293,Zm00001d035937,Zm00001d029390,Zm00001d052906,Zm00001d016832,Zm00001d051323,Zm00001d009473,Zm00001d026489,Zm00001d011315,Zm00001d020811,Zm00001d002937,Zm00001d0…	45	Zm00001d021684,Zm00001d048393,Zm00001d041814,Zm00001d024744,Zm00001d036206,Zm00001d053761,Zm00001d020058,Zm00001d013606,Zm00001d016242,Zm00001d033907,Zm00001d035916,Zm00001d026677,Zm00001d026139,Zm00001d031241,Zm00001d050074,Zm00001d053897,Zm00001d045759,Zm00001d012929,Zm00001d011459,Zm00001d034555,Zm00001d025660,Zm00001d011328,Zm00001d030551,Zm00001d050466,Zm00001d015221,Zm00001d015212,Zm00001d0…
GO:0048518	positive regulation of biological process	biological_process	0.87982	1	6	783	310	26932	3	Zm00001d043325,Zm00001d007340,Zm00001d016714	3	Zm00001d021087,Zm00001d026139,Zm00001d017755
GO:0006413	translational initiation	biological_process	0.88044	1	3	783	174	26932	0		3	Zm00001d041389,Zm00001d014873,Zm00001d015917
GO:0022618	ribonucleoprotein complex assembly	biological_process	0.88058	1	1	783	71	26932	1	Zm00001d027919	0
GO:0071826	ribonucleoprotein complex subunit organization	biological_process	0.88058	1	1	783	71	26932	1	Zm00001d027919	0
GO:0006518	peptide metabolic process	biological_process	0.88084	1	25	783	1034	26932	13	Zm00001d027271,Zm00001d011596,Zm00001d036129,Zm00001d034724,Zm00001d015204,Zm00001d003411,Zm00001d018096,Zm00001d005030,Zm00001d006596,Zm00001d027919,Zm00001d007092,Zm00001d021962,Zm00001d015037	12	Zm00001d024029,Zm00001d051850,Zm00001d031685,Zm00001d014873,Zm00001d041389,Zm00001d015917,Zm00001d045320,Zm00001d031241,Novel00549,Zm00001d045876,Zm00001d037868,Novel00972
GO:0065009	regulation of molecular function	biological_process	0.88126	1	9	783	427	26932	4	Zm00001d037969,Zm00001d026360,Zm00001d007340,Zm00001d017187	5	Zm00001d050944,Zm00001d017755,Zm00001d042867,Zm00001d021087,Zm00001d016740
GO:0044237	cellular metabolic process	biological_process	0.88255	1	269	783	9888	26932	137	Zm00001d026489,Zm00001d050247,Zm00001d008440,Zm00001d013489,Zm00001d043025,Zm00001d039451,Zm00001d052906,Novel01202,Novel01160,Zm00001d021962,Zm00001d009939,Zm00001d017462,Novel01296,Novel01047,Zm00001d017720,Zm00001d008477,Zm00001d003411,Zm00001d013644,Novel00672,Zm00001d014885,Zm00001d035937,Zm00001d026685,Zm00001d042293,Zm00001d014945,Zm00001d027919,Zm00001d017751,Zm00001d020711,Zm00001d036396…	132	Zm00001d014873,Zm00001d047981,Zm00001d026182,Zm00001d016298,Zm00001d034160,Zm00001d050466,Zm00001d028984,Zm00001d027925,Zm00001d016159,Zm00001d015212,Zm00001d025170,Zm00001d019479,Zm00001d012707,Zm00001d013655,Zm00001d037868,Zm00001d043252,Zm00001d045876,Novel00549,Zm00001d010321,Zm00001d008817,Novel01090,Zm00001d051850,Zm00001d035916,Zm00001d027245,Zm00001d025690,Zm00001d036206,Zm00001d044857,No…
GO:0006352	DNA-templated transcription, initiation	biological_process	0.88292	1	1	783	72	26932	0		1	Novel01548
GO:0071669	plant-type cell wall organization or biogenesis	biological_process	0.88396	1	1	783	71	26932	0		1	Zm00001d047276
GO:0044260	cellular macromolecule metabolic process	biological_process	0.88425	1	199	783	7461	26932	101	Zm00001d014628,Zm00001d017130,Zm00001d043663,Zm00001d019475,Zm00001d052564,Zm00001d026360,Zm00001d053876,Zm00001d022437,Zm00001d049743,Zm00001d015032,Zm00001d014840,Zm00001d038522,Zm00001d029940,Zm00001d047523,Zm00001d009473,Zm00001d015226,Zm00001d034920,Zm00001d052952,Zm00001d020437,Zm00001d037860,Zm00001d002483,Zm00001d024672,Zm00001d024768,Zm00001d036364,Zm00001d008209,Zm00001d009936,Zm00001d0…	98	Zm00001d031685,Zm00001d050944,Zm00001d022630,Zm00001d021268,Novel01087,Zm00001d012159,Zm00001d045261,Zm00001d029722,Zm00001d051608,Zm00001d049966,Zm00001d024029,Zm00001d012128,Zm00001d046127,Zm00001d044566,Zm00001d032144,Zm00001d016660,Zm00001d006835,Zm00001d051424,Zm00001d037811,Zm00001d039077,Novel01406,Zm00001d017477,Zm00001d030551,Zm00001d010634,Zm00001d027233,Zm00001d016850,Zm00001d028603,No…
GO:0042651	thylakoid membrane	cellular_component	0.88566	1	3	783	168	26932	3	Zm00001d049743,Zm00001d045144,Zm00001d021245	0
GO:0019220	regulation of phosphate metabolic process	biological_process	0.88625	1	1	783	72	26932	1	Zm00001d026360	0
GO:0051174	regulation of phosphorus metabolic process	biological_process	0.88625	1	1	783	72	26932	1	Zm00001d026360	0
GO:0019318	hexose metabolic process	biological_process	0.88834	1	1	783	74	26932	1	Zm00001d025288	0
GO:0016042	lipid catabolic process	biological_process	0.88845	1	1	783	77	26932	1	Zm00001d031813	0
GO:0044085	cellular component biogenesis	biological_process	0.88864	1	13	783	592	26932	9	Zm00001d002483,Zm00001d052902,Zm00001d017751,Zm00001d003618,Zm00001d034479,Zm00001d021422,Zm00001d038851,Zm00001d052952,Zm00001d027919	4	Novel01812,Zm00001d024071,Novel01469,Zm00001d047276
GO:0005507	copper ion binding	molecular_function	0.88997	1	1	783	76	26932	1	Zm00001d011069	0
GO:0007264	small GTPase mediated signal transduction	biological_process	0.89059	1	1	783	77	26932	1	Novel01296	0
GO:0043043	peptide biosynthetic process	biological_process	0.89084	1	24	783	1005	26932	13	Zm00001d005030,Zm00001d021962,Zm00001d015037,Zm00001d007092,Zm00001d027919,Zm00001d006596,Zm00001d011596,Zm00001d036129,Zm00001d027271,Zm00001d018096,Zm00001d034724,Zm00001d003411,Zm00001d015204	11	Zm00001d045320,Zm00001d015917,Zm00001d041389,Zm00001d037868,Novel00972,Novel00549,Zm00001d045876,Zm00001d031241,Zm00001d024029,Zm00001d014873,Zm00001d031685
GO:0051239	regulation of multicellular organismal process	biological_process	0.89153	1	1	783	78	26932	1	Novel01309	0
GO:0044702	single organism reproductive process	biological_process	0.89164	1	3	783	184	26932	1	Zm00001d021962	2	Novel01469,Zm00001d053895
GO:0048519	negative regulation of biological process	biological_process	0.89355	1	8	783	400	26932	4	Zm00001d026300,Zm00001d037969,Novel01047,Zm00001d014885	4	Zm00001d050944,Zm00001d016740,Zm00001d042867,Novel01812
GO:0030145	manganese ion binding	molecular_function	0.89865	1	1	783	74	26932	1	Zm00001d016697	0
GO:0061024	membrane organization	biological_process	0.90117	1	2	783	135	26932	2	Zm00001d042044,Zm00001d013114	0
GO:0070085	glycosylation	biological_process	0.90153	1	2	783	134	26932	1	Zm00001d012335	1	Zm00001d013052
GO:0016462	pyrophosphatase activity	molecular_function	0.90277	1	26	783	1253	26932	11	Zm00001d002937,Zm00001d026685,Zm00001d020811,Zm00001d011315,Zm00001d024138,Zm00001d021647,Novel01296,Zm00001d017720,Zm00001d014278,Zm00001d006596,Zm00001d029390	15	Zm00001d027233,Zm00001d003690,Zm00001d011328,Zm00001d023840,Zm00001d026669,Zm00001d016794,Zm00001d011006,Zm00001d025660,Zm00001d015212,Zm00001d037492,Zm00001d048393,Zm00001d016396,Zm00001d013276,Zm00001d045759,Zm00001d027245
GO:0009856	pollination	biological_process	0.90326	1	1	783	84	26932	0		1	Zm00001d043252
GO:0008654	phospholipid biosynthetic process	biological_process	0.90375	1	1	783	80	26932	0		1	Zm00001d014292
GO:0008238	exopeptidase activity	molecular_function	0.90433	1	2	783	132	26932	1	Zm00001d002678	1	Zm00001d007391
GO:0031047	gene silencing by RNA	biological_process	0.90484	1	1	783	89	26932	1	Zm00001d026300	0
GO:0004857	enzyme inhibitor activity	molecular_function	0.90494	1	3	783	174	26932	1	Zm00001d037969	2	Zm00001d016740,Zm00001d042867
GO:0061695	transferase complex, transferring phosphorus-containing groups	cellular_component	0.90551	1	1	783	83	26932	1	Zm00001d043325	0
GO:0044706	multi-multicellular organism process	biological_process	0.90625	1	1	783	85	26932	0		1	Zm00001d043252
GO:0044802	single-organism membrane organization	biological_process	0.90828	1	1	783	85	26932	1	Zm00001d042044	0
GO:0005730	nucleolus	cellular_component	0.90942	1	1	783	82	26932	1	Zm00001d052952	0
GO:0031325	positive regulation of cellular metabolic process	biological_process	0.90946	1	2	783	135	26932	2	Zm00001d043325,Zm00001d016714	0
GO:0005618	cell wall	cellular_component	0.91107	1	3	783	180	26932	1	Zm00001d028338	2	Zm00001d024071,Zm00001d032992
GO:0008080	N-acetyltransferase activity	molecular_function	0.91125	1	1	783	83	26932	1	Zm00001d034417	0
GO:0043933	macromolecular complex subunit organization	biological_process	0.91173	1	10	783	500	26932	6	Zm00001d017751,Zm00001d052902,Zm00001d027919,Zm00001d038851,Zm00001d021422,Zm00001d034479	4	Zm00001d035629,Novel01812,Zm00001d037868,Novel01469
GO:0044422	organelle part	cellular_component	0.91192	1	46	783	1908	26932	28	Zm00001d019045,Zm00001d033181,Zm00001d052410,Zm00001d025333,Zm00001d013489,Novel00001,Zm00001d052952,Zm00001d016714,Zm00001d017187,Zm00001d020437,Zm00001d002490,Zm00001d016006,Zm00001d027919,Zm00001d021962,Zm00001d021245,Zm00001d047581,Zm00001d008623,Zm00001d011069,Zm00001d026305,Zm00001d028338,Zm00001d034479,Zm00001d004978,Zm00001d035494,Zm00001d021422,Zm00001d045144,Zm00001d015256,Novel00087,Zm…	18	Zm00001d006835,Zm00001d005695,Zm00001d014744,Zm00001d051362,Zm00001d015431,Zm00001d016864,Zm00001d048583,Novel01090,Zm00001d013276,Zm00001d016619,Zm00001d045261,Novel01812,Zm00001d025660,Zm00001d050944,Zm00001d003690,Zm00001d014772,Novel00092,Novel01082
GO:0006575	cellular modified amino acid metabolic process	biological_process	0.912	1	1	783	82	26932	1	Zm00001d026531	0
GO:0016818	hydrolase activity, acting on acid anhydrides, in phosphorus-containing anhydrides	molecular_function	0.91227	1	26	783	1266	26932	11	Zm00001d002937,Zm00001d026685,Zm00001d020811,Zm00001d011315,Zm00001d024138,Zm00001d021647,Novel01296,Zm00001d017720,Zm00001d014278,Zm00001d029390,Zm00001d006596	15	Zm00001d027233,Zm00001d011328,Zm00001d003690,Zm00001d023840,Zm00001d026669,Zm00001d016794,Zm00001d011006,Zm00001d025660,Zm00001d015212,Zm00001d037492,Zm00001d048393,Zm00001d016396,Zm00001d013276,Zm00001d045759,Zm00001d027245
GO:0007010	cytoskeleton organization	biological_process	0.91345	1	3	783	190	26932	1	Zm00001d032131	2	Zm00001d035629,Novel01812
GO:0009535	chloroplast thylakoid membrane	cellular_component	0.91365	1	2	783	133	26932	2	Zm00001d045144,Zm00001d021245	0
GO:0055035	plastid thylakoid membrane	cellular_component	0.91365	1	2	783	133	26932	2	Zm00001d021245,Zm00001d045144	0
GO:0005773	vacuole	cellular_component	0.91437	1	2	783	142	26932	0		2	Zm00001d051362,Zm00001d014772
GO:0016071	mRNA metabolic process	biological_process	0.91451	1	3	783	196	26932	2	Novel00029,Zm00001d017751	1	Zm00001d026392
GO:0031410	cytoplasmic vesicle	cellular_component	0.91487	1	1	783	88	26932	1	Novel00001	0
GO:0044700	single organism signaling	biological_process	0.9163	1	13	783	639	26932	7	Zm00001d028165,Zm00001d018332,Novel01047,Zm00001d012335,Novel01296,Zm00001d043325,Novel00672	6	Zm00001d042345,Zm00001d042463,Zm00001d011328,Novel01469,Zm00001d012128,Zm00001d016277
GO:0006790	sulfur compound metabolic process	biological_process	0.91724	1	2	783	139	26932	2	Novel00672,Zm00001d013644	0
GO:0023052	signaling	biological_process	0.91738	1	13	783	640	26932	7	Zm00001d028165,Zm00001d018332,Zm00001d012335,Novel01047,Zm00001d043325,Novel01296,Novel00672	6	Zm00001d042345,Zm00001d011328,Zm00001d042463,Novel01469,Zm00001d012128,Zm00001d016277
GO:0031982	vesicle	cellular_component	0.91751	1	1	783	89	26932	1	Novel00001	0
GO:0018205	peptidyl-lysine modification	biological_process	0.91883	1	1	783	90	26932	1	Zm00001d020437	0
GO:0048316	seed development	biological_process	0.91968	1	1	783	90	26932	1	Zm00001d021962	0
GO:0006396	RNA processing	biological_process	0.91995	1	9	783	475	26932	7	Zm00001d002483,Novel00029,Zm00001d017751,Zm00001d037860,Zm00001d013489,Zm00001d052952,Zm00001d039451	2	Zm00001d051608,Zm00001d026392
GO:0044877	macromolecular complex binding	molecular_function	0.92104	1	4	783	260	26932	2	Zm00001d002937,Zm00001d029390	2	Zm00001d023840,Zm00001d045759
GO:0042451	purine nucleoside biosynthetic process	biological_process	0.92261	1	1	783	85	26932	1	Zm00001d026685	0
GO:0046129	purine ribonucleoside biosynthetic process	biological_process	0.92261	1	1	783	85	26932	1	Zm00001d026685	0
GO:0098796	membrane protein complex	cellular_component	0.92281	1	8	783	422	26932	1	Novel00087	7	Zm00001d016864,Zm00001d015431,Novel00092,Zm00001d044566,Novel01204,Zm00001d014772,Zm00001d005695
GO:0009127	purine nucleoside monophosphate biosynthetic process	biological_process	0.92291	1	1	783	86	26932	1	Zm00001d026685	0
GO:0009168	purine ribonucleoside monophosphate biosynthetic process	biological_process	0.92291	1	1	783	86	26932	1	Zm00001d026685	0
GO:0005623	cell	cellular_component	0.92298	1	197	783	7361	26932	94	Zm00001d014885,Zm00001d033181,Zm00001d019045,Zm00001d007092,Zm00001d002490,Zm00001d019734,Zm00001d003411,Zm00001d011069,Zm00001d027919,Zm00001d016006,Zm00001d016866,Zm00001d013151,Zm00001d018882,Zm00001d021245,Zm00001d026685,Zm00001d014945,Zm00001d045144,Zm00001d036129,Zm00001d035937,Zm00001d013114,Zm00001d034479,Zm00001d038606,Zm00001d051174,Novel00029,Zm00001d013489,Zm00001d026244,Novel01047,Zm…	103	Zm00001d046947,Zm00001d036206,Zm00001d014568,Zm00001d044857,Zm00001d016060,Zm00001d008974,Zm00001d014744,Zm00001d027431,Zm00001d021087,Zm00001d053895,Zm00001d025660,Zm00001d051480,Zm00001d031241,Zm00001d016619,Zm00001d042463,Zm00001d052769,Novel01082,Zm00001d034309,Zm00001d048527,Zm00001d011328,Zm00001d014772,Zm00001d015212,Zm00001d001838,Zm00001d025170,Zm00001d027925,Zm00001d028984,Zm00001d02072…
GO:0016817	hydrolase activity, acting on acid anhydrides	molecular_function	0.92367	1	26	783	1282	26932	11	Zm00001d021647,Zm00001d011315,Zm00001d024138,Zm00001d026685,Zm00001d020811,Zm00001d002937,Zm00001d006596,Zm00001d029390,Zm00001d014278,Zm00001d017720,Novel01296	15	Zm00001d026669,Zm00001d011006,Zm00001d016794,Zm00001d003690,Zm00001d011328,Zm00001d023840,Zm00001d027233,Zm00001d027245,Zm00001d048393,Zm00001d016396,Zm00001d045759,Zm00001d013276,Zm00001d015212,Zm00001d037492,Zm00001d025660
GO:0010154	fruit development	biological_process	0.92386	1	1	783	92	26932	1	Zm00001d021962	0
GO:0006260	DNA replication	biological_process	0.92397	1	2	783	148	26932	1	Zm00001d014885	1	Zm00001d015212
GO:0016410	N-acyltransferase activity	molecular_function	0.9241	1	1	783	88	26932	1	Zm00001d034417	0
GO:0016469	proton-transporting two-sector ATPase complex	cellular_component	0.92421	1	1	783	85	26932	0		1	Zm00001d015431
GO:0003735	structural constituent of ribosome	molecular_function	0.92434	1	13	783	600	26932	9	Zm00001d027271,Zm00001d011596,Zm00001d036129,Zm00001d005030,Zm00001d027919,Zm00001d034724,Zm00001d015204,Zm00001d003411,Zm00001d018096	4	Zm00001d024029,Novel00549,Zm00001d045876,Novel00972
GO:0045893	positive regulation of transcription, DNA-templated	biological_process	0.92461	1	1	783	86	26932	1	Zm00001d043325	0
GO:1902680	positive regulation of RNA biosynthetic process	biological_process	0.92461	1	1	783	86	26932	1	Zm00001d043325	0
GO:1903508	positive regulation of nucleic acid-templated transcription	biological_process	0.92461	1	1	783	86	26932	1	Zm00001d043325	0
GO:0003006	developmental process involved in reproduction	biological_process	0.92538	1	3	783	204	26932	1	Zm00001d021962	2	Zm00001d053895,Novel01469
GO:0045735	nutrient reservoir activity	molecular_function	0.92584	1	1	783	83	26932	1	Zm00001d016697	0
GO:0051254	positive regulation of RNA metabolic process	biological_process	0.92623	1	1	783	87	26932	1	Zm00001d043325	0
GO:0044424	intracellular part	cellular_component	0.92624	1	171	783	6450	26932	86	Zm00001d016006,Zm00001d027919,Zm00001d021245,Zm00001d018882,Zm00001d016866,Zm00001d013151,Zm00001d011069,Zm00001d034479,Zm00001d045144,Zm00001d014945,Zm00001d026685,Zm00001d035937,Zm00001d036129,Zm00001d019045,Zm00001d007092,Zm00001d033181,Zm00001d014885,Zm00001d003411,Zm00001d019734,Zm00001d002490,Zm00001d006596,Zm00001d017462,Zm00001d054015,Zm00001d021962,Zm00001d047581,Novel01047,Zm00001d00862…	85	Zm00001d031241,Zm00001d051480,Zm00001d042463,Zm00001d016619,Zm00001d021087,Zm00001d027431,Zm00001d025660,Zm00001d053895,Zm00001d014772,Zm00001d011328,Novel01082,Zm00001d048527,Zm00001d046947,Zm00001d014568,Zm00001d036206,Zm00001d044857,Zm00001d008974,Zm00001d014744,Zm00001d016060,Zm00001d010321,Zm00001d008817,Novel01090,Zm00001d045876,Novel00549,Zm00001d037868,Zm00001d051055,Zm00001d026392,Zm0000…
GO:0005694	chromosome	cellular_component	0.92669	1	4	783	245	26932	4	Zm00001d019045,Zm00001d034479,Zm00001d021422,Zm00001d043325	0
GO:0000139	Golgi membrane	cellular_component	0.9267	1	2	783	153	26932	2	Zm00001d015256,Zm00001d035494	0
GO:0051603	proteolysis involved in cellular protein catabolic process	biological_process	0.92739	1	3	783	203	26932	0		3	Zm00001d050944,Zm00001d053897,Novel01090
GO:0043227	membrane-bounded organelle	cellular_component	0.92866	1	115	783	4467	26932	56	Zm00001d043325,Zm00001d045144,Zm00001d043094,Zm00001d021422,Zm00001d026447,Zm00001d034479,Zm00001d026305,Zm00001d011069,Zm00001d018882,Zm00001d016866,Zm00001d013151,Zm00001d021245,Zm00001d016006,Zm00001d002490,Zm00001d027530,Zm00001d017187,Zm00001d019734,Zm00001d014885,Zm00001d012301,Zm00001d041886,Zm00001d048991,Zm00001d025333,Zm00001d052410,Zm00001d007092,Zm00001d019045,Zm00001d033181,Zm00001d0…	59	Zm00001d038291,Zm00001d048527,Zm00001d041453,Zm00001d010634,Novel01082,Zm00001d014772,Zm00001d011328,Zm00001d045320,Zm00001d016277,Zm00001d025660,Novel00326,Zm00001d053895,Zm00001d027431,Zm00001d042463,Zm00001d016619,Zm00001d048583,Zm00001d051480,Zm00001d016864,Zm00001d016060,Zm00001d013052,Zm00001d008974,Zm00001d014744,Zm00001d044857,Zm00001d014568,Zm00001d046947,Zm00001d000279,Novel01317,Novel0…
GO:0043231	intracellular membrane-bounded organelle	cellular_component	0.92866	1	115	783	4467	26932	56	Zm00001d045144,Zm00001d043325,Zm00001d021422,Zm00001d043094,Zm00001d034479,Zm00001d026447,Zm00001d011069,Zm00001d026305,Zm00001d016006,Zm00001d013151,Zm00001d016866,Zm00001d018882,Zm00001d021245,Zm00001d002490,Zm00001d027530,Zm00001d019734,Zm00001d017187,Zm00001d014885,Zm00001d041886,Zm00001d012301,Zm00001d026016,Zm00001d033181,Zm00001d019045,Zm00001d007092,Zm00001d048991,Zm00001d052410,Zm00001d0…	59	Zm00001d010634,Novel01082,Zm00001d038291,Zm00001d048527,Zm00001d041453,Zm00001d014772,Zm00001d011328,Zm00001d027431,Zm00001d016277,Zm00001d045320,Novel00326,Zm00001d053895,Zm00001d025660,Zm00001d051480,Zm00001d048583,Zm00001d016619,Zm00001d042463,Zm00001d016060,Zm00001d016864,Zm00001d008974,Zm00001d014744,Zm00001d013052,Zm00001d046947,Zm00001d014568,Zm00001d044857,Zm00001d000279,Novel00092,Zm0000…
GO:0017111	nucleoside-triphosphatase activity	molecular_function	0.92884	1	24	783	1208	26932	10	Zm00001d011315,Zm00001d024138,Zm00001d021647,Zm00001d002937,Zm00001d020811,Zm00001d006596,Zm00001d029390,Novel01296,Zm00001d017720,Zm00001d014278	14	Zm00001d003690,Zm00001d011328,Zm00001d023840,Zm00001d026669,Zm00001d016794,Zm00001d011006,Zm00001d027233,Zm00001d048393,Zm00001d045759,Zm00001d016396,Zm00001d013276,Zm00001d027245,Zm00001d025660,Zm00001d015212
GO:0044427	chromosomal part	cellular_component	0.92885	1	3	783	195	26932	3	Zm00001d019045,Zm00001d034479,Zm00001d021422	0
GO:0044257	cellular protein catabolic process	biological_process	0.92891	1	3	783	204	26932	0		3	Novel01090,Zm00001d053897,Zm00001d050944
GO:0005622	intracellular	cellular_component	0.92914	1	180	783	6784	26932	88	Zm00001d026305,Zm00001d034724,Zm00001d018096,Zm00001d043094,Zm00001d021422,Zm00001d026447,Zm00001d051166,Zm00001d027271,Zm00001d043325,Zm00001d026016,Zm00001d042888,Zm00001d026531,Zm00001d048991,Zm00001d038975,Zm00001d025333,Zm00001d052410,Zm00001d015037,Zm00001d029997,Novel00001,Zm00001d010375,Zm00001d012301,Zm00001d041886,Zm00001d015204,Zm00001d032131,Zm00001d017187,Zm00001d045544,Zm00001d00039…	92	Zm00001d048583,Zm00001d045320,Zm00001d016277,Novel00326,Zm00001d010634,Zm00001d016850,Zm00001d038291,Novel00894,Zm00001d041453,Zm00001d035629,Zm00001d015372,Novel00972,Zm00001d000279,Novel01204,Zm00001d034208,Zm00001d013052,Zm00001d033907,Zm00001d016864,Zm00001d042600,Zm00001d013276,Zm00001d045261,Novel01812,Zm00001d051608,Zm00001d026669,Zm00001d043234,Zm00001d013445,Zm00001d003690,Zm00001d050944…
GO:0016020	membrane	cellular_component	0.92919	1	236	783	8871	26932	97	Zm00001d009473,Zm00001d047801,Zm00001d011315,Zm00001d016714,Zm00001d000196,Zm00001d042993,Zm00001d034772,Zm00001d020042,Zm00001d002937,Zm00001d015747,Zm00001d016744,Zm00001d026295,Zm00001d034540,Zm00001d016103,Zm00001d049743,Zm00001d025662,Zm00001d042692,Novel00087,Zm00001d040264,Zm00001d038522,Zm00001d018984,Zm00001d045051,Zm00001d042144,Zm00001d018665,Zm00001d025943,Novel01880,Zm00001d016802,No…	139	Zm00001d011006,Zm00001d005695,Zm00001d010440,Zm00001d044566,Zm00001d024029,Zm00001d021128,Zm00001d046127,Zm00001d051362,Zm00001d041229,Zm00001d052261,Zm00001d015431,Zm00001d040627,Zm00001d006697,Zm00001d028164,Zm00001d039713,Zm00001d053446,Zm00001d025894,Zm00001d046667,Zm00001d021938,Zm00001d000195,Zm00001d000204,Zm00001d023673,Zm00001d016299,Zm00001d004168,Zm00001d039682,Zm00001d040246,Zm00001d0…
GO:0009892	negative regulation of metabolic process	biological_process	0.92929	1	6	783	339	26932	3	Zm00001d014885,Zm00001d026300,Zm00001d037969	3	Zm00001d050944,Zm00001d016740,Zm00001d042867
GO:0016866	intramolecular transferase activity	molecular_function	0.93146	1	1	783	92	26932	1	Zm00001d036396	0
GO:0044464	cell part	cellular_component	0.93223	1	191	783	7182	26932	92	Novel00029,Zm00001d038606,Zm00001d051174,Zm00001d013489,Zm00001d026244,Zm00001d005030,Novel01047,Zm00001d042044,Zm00001d008623,Zm00001d047581,Zm00001d021962,Zm00001d054015,Zm00001d017462,Zm00001d006596,Zm00001d015256,Zm00001d035494,Zm00001d050462,Zm00001d028338,Zm00001d014885,Zm00001d033181,Zm00001d007092,Zm00001d019045,Zm00001d002490,Zm00001d019734,Zm00001d003411,Zm00001d011069,Zm00001d016866,Zm…	99	Zm00001d027925,Zm00001d015212,Zm00001d001838,Zm00001d025170,Zm00001d024200,Zm00001d012897,Zm00001d028984,Zm00001d020722,Zm00001d046625,Zm00001d026182,Zm00001d025545,Zm00001d016298,Zm00001d034160,Zm00001d022526,Zm00001d051252,Zm00001d026096,Zm00001d014873,Zm00001d026392,Zm00001d051055,Zm00001d037868,Novel00549,Zm00001d045876,Novel01090,Zm00001d008817,Zm00001d010321,Novel01317,Novel00092,Zm00001d04…
GO:0043232	intracellular non-membrane-bounded organelle	cellular_component	0.93231	1	30	783	1291	26932	22	Zm00001d032131,Zm00001d052952,Zm00001d019898,Zm00001d015204,Zm00001d046129,Zm00001d003411,Zm00001d034724,Zm00001d030114,Zm00001d034479,Zm00001d021422,Zm00001d018096,Zm00001d002490,Zm00001d027271,Zm00001d043325,Zm00001d036129,Zm00001d011596,Zm00001d033181,Zm00001d019045,Zm00001d027919,Zm00001d038975,Zm00001d047581,Zm00001d005030	8	Zm00001d003690,Zm00001d024029,Zm00001d035629,Novel00549,Zm00001d045876,Zm00001d013276,Novel00972,Novel01812
GO:0043228	non-membrane-bounded organelle	cellular_component	0.93296	1	30	783	1292	26932	22	Zm00001d038975,Zm00001d047581,Zm00001d033181,Zm00001d019045,Zm00001d027919,Zm00001d005030,Zm00001d030114,Zm00001d034479,Zm00001d021422,Zm00001d018096,Zm00001d032131,Zm00001d052952,Zm00001d019898,Zm00001d003411,Zm00001d015204,Zm00001d046129,Zm00001d034724,Zm00001d043325,Zm00001d036129,Zm00001d011596,Zm00001d002490,Zm00001d027271	8	Zm00001d013276,Novel00972,Novel00549,Zm00001d045876,Novel01812,Zm00001d003690,Zm00001d035629,Zm00001d024029
GO:0044446	intracellular organelle part	cellular_component	0.93307	1	45	783	1907	26932	28	Zm00001d021962,Zm00001d021245,Zm00001d047581,Zm00001d016006,Zm00001d027919,Zm00001d026305,Zm00001d008623,Zm00001d011069,Zm00001d034479,Zm00001d004978,Zm00001d035494,Zm00001d021422,Zm00001d028338,Zm00001d015256,Novel00087,Zm00001d043325,Zm00001d045144,Zm00001d052410,Zm00001d025333,Zm00001d013489,Zm00001d019045,Zm00001d033181,Novel00001,Zm00001d017187,Zm00001d016714,Zm00001d020437,Zm00001d052952,Zm…	17	Zm00001d013276,Zm00001d016619,Zm00001d048583,Novel01090,Novel01812,Zm00001d045261,Zm00001d050944,Zm00001d003690,Zm00001d014772,Novel00092,Novel01082,Zm00001d006835,Zm00001d005695,Zm00001d014744,Zm00001d015431,Zm00001d016864,Zm00001d051362
GO:0031984	organelle subcompartment	cellular_component	0.93324	1	3	783	196	26932	3	Zm00001d004978,Zm00001d021245,Zm00001d045144	0
GO:0044703	multi-organism reproductive process	biological_process	0.93418	1	2	783	151	26932	0		2	Novel01469,Zm00001d043252
GO:0045935	positive regulation of nucleobase-containing compound metabolic process	biological_process	0.93441	1	1	783	91	26932	1	Zm00001d043325	0
GO:0016458	gene silencing	biological_process	0.93454	1	1	783	103	26932	1	Zm00001d026300	0
GO:0010557	positive regulation of macromolecule biosynthetic process	biological_process	0.93487	1	1	783	91	26932	1	Zm00001d043325	0
GO:0016407	acetyltransferase activity	molecular_function	0.93618	1	1	783	94	26932	1	Zm00001d034417	0
GO:0090305	nucleic acid phosphodiester bond hydrolysis	biological_process	0.9363	1	3	783	209	26932	2	Zm00001d039451,Zm00001d017751	1	Zm00001d022630
GO:0042592	homeostatic process	biological_process	0.93733	1	9	783	548	26932	3	Zm00001d051851,Zm00001d015747,Zm00001d016786	6	Zm00001d052769,Zm00001d023869,Zm00001d052034,Zm00001d027245,Zm00001d023873,Zm00001d027233
GO:0009987	cellular process	biological_process	0.93778	1	336	783	12417	26932	162	Zm00001d020711,Zm00001d017751,Zm00001d036396,Zm00001d027919,Zm00001d035937,Zm00001d042293,Zm00001d014945,Zm00001d026685,Zm00001d034479,Zm00001d014885,Novel00672,Zm00001d008477,Zm00001d003411,Zm00001d013644,Novel01296,Zm00001d017720,Novel01047,Zm00001d021962,Zm00001d009939,Zm00001d017462,Zm00001d015256,Novel01160,Zm00001d018332,Zm00001d035494,Novel01202,Zm00001d050462,Zm00001d026156,Zm00001d052906…	174	Zm00001d012929,Novel01548,Zm00001d013652,Zm00001d033446,Zm00001d004109,Zm00001d050074,Zm00001d042463,Zm00001d031241,Zm00001d051480,Novel01082,Zm00001d045572,Zm00001d036206,Zm00001d044857,Zm00001d025690,Zm00001d027245,Zm00001d035916,Zm00001d051850,Zm00001d037492,Zm00001d037868,Zm00001d043252,Zm00001d010321,Zm00001d008817,Novel01090,Novel00549,Zm00001d045876,Zm00001d013655,Zm00001d012707,Zm00001d04…
GO:0005634	nucleus	cellular_component	0.93798	1	63	783	2582	26932	29	Zm00001d034920,Zm00001d015226,Zm00001d052952,Zm00001d008345,Zm00001d019734,Zm00001d027530,Zm00001d013489,Zm00001d048991,Zm00001d036364,Zm00001d019045,Zm00001d041886,Zm00001d012301,Zm00001d014885,Novel00029,Zm00001d034479,Zm00001d026447,Zm00001d021422,Zm00001d019475,Zm00001d043094,Zm00001d052564,Zm00001d014628,Zm00001d043325,Zm00001d013151,Zm00001d018882,Zm00001d038851,Zm00001d017462,Zm00001d02630…	34	Zm00001d022526,Zm00001d026096,Zm00001d026182,Zm00001d032144,Zm00001d034160,Zm00001d016298,Zm00001d012128,Zm00001d024200,Zm00001d028984,Zm00001d006835,Zm00001d014568,Zm00001d044857,Zm00001d027925,Zm00001d039077,Zm00001d017477,Zm00001d046947,Zm00001d001838,Zm00001d050944,Zm00001d011328,Zm00001d039506,Zm00001d041453,Zm00001d048527,Zm00001d021268,Novel01082,Zm00001d010634,Zm00001d042463,Novel01090,Zm…
GO:0046982	protein heterodimerization activity	molecular_function	0.93819	1	2	783	145	26932	2	Zm00001d021422,Zm00001d019045	0
GO:0005198	structural molecule activity	molecular_function	0.93965	1	15	783	704	26932	9	Zm00001d027271,Zm00001d036129,Zm00001d011596,Zm00001d005030,Zm00001d003411,Zm00001d015204,Zm00001d034724,Zm00001d027919,Zm00001d018096	6	Zm00001d024029,Zm00001d016183,Novel00549,Zm00001d045876,Novel00972,Novel01469
GO:0009156	ribonucleoside monophosphate biosynthetic process	biological_process	0.93991	1	1	783	95	26932	1	Zm00001d026685	0
GO:0005794	Golgi apparatus	cellular_component	0.94191	1	4	783	268	26932	2	Zm00001d035494,Zm00001d015256	2	Zm00001d048583,Zm00001d013052
GO:0044428	nuclear part	cellular_component	0.94202	1	7	783	406	26932	3	Zm00001d052952,Zm00001d013489,Zm00001d026305	4	Novel01090,Zm00001d006835,Novel01082,Zm00001d050944
GO:0010628	positive regulation of gene expression	biological_process	0.9428	1	1	783	96	26932	1	Zm00001d043325	0
GO:0044430	cytoskeletal part	cellular_component	0.94321	1	3	783	218	26932	0		3	Zm00001d003690,Novel01812,Zm00001d013276
GO:0009124	nucleoside monophosphate biosynthetic process	biological_process	0.94464	1	1	783	98	26932	1	Zm00001d026685	0
GO:0051173	positive regulation of nitrogen compound metabolic process	biological_process	0.94482	1	1	783	97	26932	1	Zm00001d043325	0
GO:0016021	integral component of membrane	cellular_component	0.94574	1	211	783	8053	26932	81	Zm00001d038522,Zm00001d040264,Zm00001d034540,Zm00001d025662,Zm00001d042692,Zm00001d026295,Zm00001d011315,Zm00001d016714,Zm00001d009473,Zm00001d002937,Zm00001d016744,Zm00001d015747,Zm00001d000196,Zm00001d020042,Zm00001d042993,Zm00001d034772,Zm00001d042008,Zm00001d034172,Zm00001d019750,Zm00001d043512,Zm00001d017653,Zm00001d016949,Zm00001d041308,Zm00001d008632,Zm00001d044777,Zm00001d044157,Zm00001d0…	130	Zm00001d016396,Zm00001d013276,Zm00001d016080,Zm00001d039682,Zm00001d040246,Zm00001d000204,Zm00001d023673,Zm00001d000195,Zm00001d016299,Zm00001d004168,Zm00001d028164,Zm00001d006697,Zm00001d040627,Zm00001d021938,Zm00001d053446,Zm00001d039713,Zm00001d046667,Zm00001d025894,Zm00001d010440,Zm00001d011006,Zm00001d052261,Zm00001d041229,Zm00001d044566,Zm00001d024029,Zm00001d021128,Zm00001d046127,Zm00001d0…
GO:0048856	anatomical structure development	biological_process	0.94609	1	6	783	366	26932	4	Zm00001d026498,Zm00001d028165,Zm00001d021962,Zm00001d053926	2	Zm00001d053895,Novel01469
GO:0048731	system development	biological_process	0.94638	1	4	783	271	26932	3	Zm00001d021962,Zm00001d026498,Zm00001d028165	1	Zm00001d053895
GO:0005996	monosaccharide metabolic process	biological_process	0.9476	1	1	783	100	26932	1	Zm00001d025288	0
GO:0009163	nucleoside biosynthetic process	biological_process	0.94782	1	1	783	99	26932	1	Zm00001d026685	0
GO:0042455	ribonucleoside biosynthetic process	biological_process	0.94782	1	1	783	99	26932	1	Zm00001d026685	0
GO:1901659	glycosyl compound biosynthetic process	biological_process	0.94782	1	1	783	99	26932	1	Zm00001d026685	0
GO:0007165	signal transduction	biological_process	0.94809	1	12	783	635	26932	6	Novel01047,Zm00001d012335,Novel01296,Zm00001d043325,Zm00001d028165,Zm00001d018332	6	Zm00001d012128,Zm00001d016277,Zm00001d042345,Zm00001d042463,Zm00001d011328,Novel01469
GO:0006310	DNA recombination	biological_process	0.94813	1	1	783	106	26932	0		1	Zm00001d015212
GO:0009152	purine ribonucleotide biosynthetic process	biological_process	0.94821	1	1	783	99	26932	1	Zm00001d026685	0
GO:0098805	whole membrane	cellular_component	0.94877	1	3	783	220	26932	0		3	Zm00001d014772,Zm00001d051362,Novel00092
GO:0042623	ATPase activity, coupled	molecular_function	0.94926	1	3	783	238	26932	1	Zm00001d017720	2	Zm00001d016794,Zm00001d015212
GO:0031224	intrinsic component of membrane	cellular_component	0.94981	1	211	783	8069	26932	81	Zm00001d005430,Zm00001d016841,Zm00001d027919,Zm00001d034904,Novel00672,Zm00001d034095,Zm00001d022529,Zm00001d032016,Zm00001d009106,Zm00001d035306,Zm00001d045972,Zm00001d008477,Zm00001d029247,Zm00001d017713,Zm00001d029246,Zm00001d028298,Zm00001d013231,Zm00001d016280,Zm00001d002678,Zm00001d016948,Zm00001d018332,Zm00001d021461,Zm00001d021647,Zm00001d033872,Zm00001d016786,Zm00001d025255,Zm00001d01729…	130	Zm00001d025734,Zm00001d023592,Zm00001d049571,Zm00001d019320,Zm00001d037646,Zm00001d016567,Zm00001d016308,Zm00001d045572,Zm00001d003817,Zm00001d016801,Zm00001d013652,Zm00001d010231,Zm00001d028311,Zm00001d051653,Zm00001d033446,Zm00001d026187,Zm00001d050074,Zm00001d042463,Zm00001d005624,Zm00001d009932,Zm00001d051850,Zm00001d012576,Zm00001d016060,Zm00001d025740,Zm00001d046781,Zm00001d014744,Zm00001d0…
GO:0015399	primary active transmembrane transporter activity	molecular_function	0.95106	1	2	783	178	26932	0		2	Zm00001d016794,Zm00001d037492
GO:0015405	P-P-bond-hydrolysis-driven transmembrane transporter activity	molecular_function	0.95106	1	2	783	178	26932	0		2	Zm00001d016794,Zm00001d037492
GO:0044425	membrane part	cellular_component	0.95107	1	219	783	8355	26932	83	Zm00001d017713,Zm00001d029247,Zm00001d008477,Zm00001d045972,Zm00001d035306,Zm00001d009106,Zm00001d032016,Zm00001d034095,Zm00001d022529,Novel00672,Zm00001d028298,Zm00001d029246,Zm00001d016841,Zm00001d005430,Zm00001d034904,Zm00001d027919,Zm00001d042750,Zm00001d008203,Zm00001d042749,Zm00001d020811,Zm00001d009705,Zm00001d049640,Zm00001d005315,Zm00001d052906,Zm00001d031949,Zm00001d051174,Zm00001d02615…	136	Zm00001d008974,Zm00001d014744,Zm00001d046781,Zm00001d016060,Zm00001d025740,Zm00001d012576,Zm00001d051850,Zm00001d009932,Zm00001d043374,Zm00001d025476,Zm00001d051681,Zm00001d007391,Zm00001d022089,Zm00001d026591,Zm00001d003817,Zm00001d014772,Zm00001d045572,Zm00001d016567,Zm00001d016308,Zm00001d037646,Zm00001d019320,Zm00001d049571,Zm00001d023592,Zm00001d025734,Zm00001d005624,Zm00001d016619,Zm00001d0…
GO:0044391	ribosomal subunit	cellular_component	0.95111	1	1	783	97	26932	1	Zm00001d027919	0
GO:0032991	macromolecular complex	cellular_component	0.95311	1	56	783	2335	26932	30	Zm00001d024839,Zm00001d005030,Zm00001d026305,Zm00001d027919,Zm00001d047581,Zm00001d018882,Zm00001d016866,Zm00001d027271,Novel00087,Zm00001d036129,Zm00001d043325,Zm00001d034724,Zm00001d050462,Zm00001d034479,Zm00001d030114,Zm00001d018096,Zm00001d021422,Novel00001,Zm00001d019045,Zm00001d042888,Zm00001d038975,Zm00001d013489,Zm00001d002490,Zm00001d002483,Zm00001d011596,Zm00001d019898,Zm00001d052952,Zm…	26	Zm00001d026392,Novel01090,Novel00549,Zm00001d045876,Novel01469,Zm00001d013276,Zm00001d016850,Novel01082,Novel00092,Zm00001d015372,Novel00894,Zm00001d050944,Zm00001d052245,Zm00001d003690,Zm00001d014772,Novel01204,Zm00001d016159,Zm00001d034208,Zm00001d006835,Novel00972,Zm00001d044566,Zm00001d024029,Zm00001d015431,Zm00001d016864,Zm00001d005695,Zm00001d014873
GO:0006164	purine nucleotide biosynthetic process	biological_process	0.95405	1	1	783	103	26932	1	Zm00001d026685	0
GO:0051276	chromosome organization	biological_process	0.95522	1	9	783	590	26932	4	Zm00001d017720,Zm00001d038851,Zm00001d021422,Zm00001d034479	5	Zm00001d015212,Zm00001d027233,Zm00001d027245,Novel01090,Zm00001d050944
GO:0003899	DNA-directed RNA polymerase activity	molecular_function	0.95596	1	1	783	108	26932	0		1	Zm00001d026421
GO:0007154	cell communication	biological_process	0.95608	1	14	783	737	26932	7	Novel01296,Zm00001d043325,Novel00672,Novel01047,Zm00001d012335,Zm00001d018332,Zm00001d028165	7	Zm00001d016277,Zm00001d012128,Zm00001d043252,Zm00001d042463,Zm00001d011328,Novel01469,Zm00001d042345
GO:0046914	transition metal ion binding	molecular_function	0.95901	1	45	783	1966	26932	30	Zm00001d014885,Zm00001d024314,Zm00001d029822,Zm00001d044156,Zm00001d015037,Zm00001d029390,Zm00001d002937,Zm00001d034095,Zm00001d009106,Zm00001d039193,Zm00001d012304,Zm00001d028616,Zm00001d045051,Zm00001d013644,Zm00001d017653,Zm00001d014134,Zm00001d011069,Zm00001d016697,Zm00001d042008,Zm00001d048451,Zm00001d033152,Zm00001d048819,Zm00001d013231,Zm00001d012322,Zm00001d044157,Zm00001d046342,Zm00001d0…	15	Zm00001d044120,Zm00001d032090,Zm00001d024200,Zm00001d051501,Zm00001d016164,Zm00001d047837,Zm00001d020717,Zm00001d049059,Zm00001d029806,Zm00001d039377,Zm00001d018190,Zm00001d041730,Zm00001d043613,Zm00001d005630,Zm00001d021038
GO:0009521	photosystem	cellular_component	0.95914	1	1	783	103	26932	0		1	Novel01204
GO:0043234	protein complex	cellular_component	0.95954	1	32	783	1465	26932	11	Zm00001d050462,Zm00001d034479,Zm00001d021422,Novel00087,Zm00001d043325,Zm00001d016866,Zm00001d024839,Zm00001d026305,Zm00001d042888,Zm00001d019045,Novel00001	21	Zm00001d052245,Zm00001d050944,Zm00001d003690,Zm00001d014772,Zm00001d016850,Novel01082,Novel00092,Zm00001d015372,Novel00894,Novel01090,Zm00001d013276,Novel01469,Zm00001d005695,Zm00001d014873,Zm00001d044566,Zm00001d015431,Zm00001d016864,Zm00001d006835,Novel01204,Zm00001d016159,Zm00001d034208
GO:0008234	cysteine-type peptidase activity	molecular_function	0.9607	1	4	783	290	26932	0		4	Zm00001d049113,Zm00001d049109,Novel00789,Zm00001d031241
GO:0070011	peptidase activity, acting on L-amino acid peptides	molecular_function	0.96107	1	17	783	864	26932	5	Novel00755,Zm00001d002678,Zm00001d020886,Zm00001d007753,Zm00001d047634	12	Zm00001d005859,Zm00001d021231,Novel00789,Zm00001d051779,Zm00001d016477,Zm00001d002833,Zm00001d021283,Zm00001d007391,Zm00001d049109,Zm00001d049113,Zm00001d031241,Zm00001d026521
GO:0005575	cellular_component	cellular_component	0.96161	1	399	783	14606	26932	176	Zm00001d032016,Zm00001d029247,Zm00001d019734,Zm00001d045972,Zm00001d007092,Zm00001d029246,Zm00001d019045,Zm00001d033181,Zm00001d045144,Zm00001d036129,Zm00001d013114,Zm00001d005430,Zm00001d011069,Zm00001d051130,Zm00001d016006,Zm00001d016697,Zm00001d016866,Zm00001d013151,Zm00001d020811,Zm00001d009705,Zm00001d008203,Zm00001d042750,Novel00029,Zm00001d005315,Zm00001d016948,Zm00001d013231,Zm00001d01628…	223	Zm00001d025740,Zm00001d009932,Zm00001d046781,Zm00001d008974,Zm00001d014744,Zm00001d046947,Zm00001d014568,Zm00001d051681,Zm00001d007391,Zm00001d016308,Zm00001d025734,Zm00001d048527,Zm00001d049571,Zm00001d003817,Zm00001d014772,Zm00001d011328,Zm00001d026521,Zm00001d021087,Zm00001d028311,Zm00001d027431,Zm00001d051653,Zm00001d025660,Zm00001d053895,Zm00001d016801,Zm00001d005624,Zm00001d052769,Zm00001d0…
GO:0044238	primary metabolic process	biological_process	0.96184	1	276	783	10424	26932	130	Zm00001d016457,Zm00001d025333,Zm00001d026018,Zm00001d026531,Zm00001d041886,Zm00001d017187,Zm00001d015204,Zm00001d023480,Zm00001d011596,Zm00001d000399,Zm00001d018665,Zm00001d025943,Zm00001d026305,Zm00001d003212,Zm00001d037607,Zm00001d018096,Zm00001d043094,Zm00001d051166,Zm00001d034724,Zm00001d043325,Zm00001d036364,Zm00001d008209,Zm00001d009936,Zm00001d020886,Zm00001d024672,Zm00001d012335,Zm00001d0…	146	Zm00001d032090,Zm00001d041814,Zm00001d039032,Zm00001d021283,Zm00001d046751,Zm00001d035899,Zm00001d013606,Novel00848,Zm00001d025354,Zm00001d053897,Zm00001d016277,Zm00001d024071,Zm00001d008190,Zm00001d012413,Zm00001d021231,Zm00001d028603,Zm00001d015372,Zm00001d050917,Zm00001d016850,Zm00001d006835,Zm00001d017477,Zm00001d037811,Zm00001d051424,Zm00001d046134,Zm00001d011477,Zm00001d013573,Zm00001d03214…
GO:0030163	protein catabolic process	biological_process	0.96253	1	3	783	234	26932	0		3	Zm00001d053897,Zm00001d050944,Novel01090
GO:0009165	nucleotide biosynthetic process	biological_process	0.96278	1	2	783	173	26932	1	Zm00001d026685	1	Zm00001d035916
GO:0048608	reproductive structure development	biological_process	0.9633	1	2	783	182	26932	1	Zm00001d021962	1	Zm00001d053895
GO:0061458	reproductive system development	biological_process	0.9633	1	2	783	182	26932	1	Zm00001d021962	1	Zm00001d053895
GO:1901293	nucleoside phosphate biosynthetic process	biological_process	0.96364	1	2	783	174	26932	1	Zm00001d026685	1	Zm00001d035916
GO:0043229	intracellular organelle	cellular_component	0.96416	1	138	783	5402	26932	71	Zm00001d014885,Zm00001d033181,Zm00001d007092,Zm00001d019045,Zm00001d002490,Zm00001d003411,Zm00001d019734,Zm00001d011069,Zm00001d027919,Zm00001d016006,Zm00001d013151,Zm00001d016866,Zm00001d018882,Zm00001d021245,Zm00001d045144,Zm00001d036129,Zm00001d034479,Zm00001d038606,Novel00029,Zm00001d013489,Zm00001d008623,Novel01047,Zm00001d005030,Zm00001d054015,Zm00001d017462,Zm00001d047581,Zm00001d021962,Zm…	67	Zm00001d046947,Zm00001d044857,Zm00001d014568,Zm00001d016060,Zm00001d008974,Zm00001d014744,Zm00001d027431,Zm00001d053895,Zm00001d025660,Zm00001d051480,Zm00001d016619,Zm00001d042463,Novel01082,Zm00001d048527,Zm00001d011328,Zm00001d014772,Zm00001d001838,Zm00001d025170,Zm00001d027925,Zm00001d028984,Zm00001d020722,Zm00001d024200,Zm00001d016298,Zm00001d034160,Zm00001d026182,Zm00001d025545,Zm00001d02609…
GO:0043226	organelle	cellular_component	0.96501	1	138	783	5406	26932	71	Zm00001d019475,Zm00001d052564,Zm00001d030114,Zm00001d004978,Zm00001d014628,Novel00087,Zm00001d038851,Zm00001d029940,Zm00001d020437,Zm00001d016714,Zm00001d046129,Zm00001d034920,Zm00001d015226,Zm00001d052952,Zm00001d019898,Zm00001d008345,Zm00001d034887,Zm00001d015747,Zm00001d037860,Zm00001d036364,Zm00001d021422,Zm00001d043094,Zm00001d018096,Zm00001d026447,Zm00001d034724,Zm00001d043325,Zm00001d02727…	67	Zm00001d003690,Zm00001d050944,Zm00001d021268,Zm00001d013276,Zm00001d042600,Novel01812,Zm00001d045261,Zm00001d005695,Zm00001d032144,Zm00001d015431,Zm00001d012128,Zm00001d024029,Zm00001d051362,Zm00001d006835,Zm00001d039077,Zm00001d017477,GRMZM5G815453,Zm00001d038291,Zm00001d041453,Zm00001d035629,Zm00001d010634,Zm00001d048583,Zm00001d016277,Zm00001d045320,Novel00326,Zm00001d013052,Zm00001d016864,Nov…
GO:0009260	ribonucleotide biosynthetic process	biological_process	0.96509	1	1	783	113	26932	1	Zm00001d026685	0
GO:0046390	ribose phosphate biosynthetic process	biological_process	0.96509	1	1	783	113	26932	1	Zm00001d026685	0
GO:0016788	hydrolase activity, acting on ester bonds	molecular_function	0.96787	1	18	783	901	26932	5	Zm00001d048990,Zm00001d034887,Zm00001d017751,Zm00001d039451,Zm00001d010373	13	Zm00001d050917,Zm00001d001800,Zm00001d022630,Zm00001d031934,Zm00001d037828,Zm00001d036175,Zm00001d032992,Zm00001d011477,Zm00001d033079,Zm00001d012924,Zm00001d038143,Zm00001d016801,Zm00001d040733
GO:0044267	cellular protein metabolic process	biological_process	0.96822	1	99	783	4052	26932	53	Zm00001d016866,Novel01559,Zm00001d028613,Zm00001d032069,Zm00001d029847,Zm00001d027919,Zm00001d043512,Zm00001d003212,Zm00001d015344,Zm00001d008632,Zm00001d018096,Zm00001d052809,Zm00001d053652,Zm00001d034724,Zm00001d035937,Zm00001d036129,Zm00001d042293,Zm00001d027271,Zm00001d015037,Zm00001d026018,Zm00001d007092,Zm00001d029997,Zm00001d017187,Zm00001d008477,Zm00001d023480,Zm00001d015204,Zm00001d00341…	46	Zm00001d053897,Zm00001d004109,Zm00001d050074,Zm00001d026139,Zm00001d031241,Zm00001d050635,Zm00001d026677,Zm00001d034555,Zm00001d015917,Zm00001d012929,Zm00001d045320,Zm00001d016850,Zm00001d030551,Novel00972,Zm00001d021684,Zm00001d053761,Zm00001d024744,Zm00001d041389,Zm00001d016242,Zm00001d013052,Zm00001d013606,Zm00001d051850,Zm00001d037868,Zm00001d043252,Novel01090,Zm00001d041298,Zm00001d045876,No…
GO:0016773	phosphotransferase activity, alcohol group as acceptor	molecular_function	0.96891	1	38	783	1786	26932	18	Zm00001d009473,Zm00001d026489,Zm00001d008477,Zm00001d018665,Zm00001d026018,Zm00001d052906,Zm00001d051323,Zm00001d010375,Zm00001d053876,Zm00001d008632,Zm00001d042293,Zm00001d032069,Zm00001d015032,Zm00001d028613,Zm00001d038522,Zm00001d025255,Zm00001d003212,Zm00001d043512	20	Zm00001d016242,Zm00001d013606,Zm00001d033907,Zm00001d050466,Zm00001d021684,Zm00001d037811,Zm00001d051424,Zm00001d024744,Zm00001d053761,Zm00001d036206,Zm00001d030551,Novel01087,Zm00001d012707,Zm00001d041298,Zm00001d026139,Zm00001d026677,Zm00001d043252,Zm00001d050074,Zm00001d034555,Zm00001d012929
GO:0006974	cellular response to DNA damage stimulus	biological_process	0.96905	1	7	783	517	26932	1	Zm00001d014885	6	Zm00001d014568,Zm00001d016801,Novel01082,Zm00001d027233,Zm00001d015212,Zm00001d027245
GO:0034062	RNA polymerase activity	molecular_function	0.9698	1	1	783	122	26932	0		1	Zm00001d026421
GO:1901137	carbohydrate derivative biosynthetic process	biological_process	0.97085	1	4	783	293	26932	2	Zm00001d026685,Zm00001d012335	2	Zm00001d045261,Zm00001d013052
GO:0048522	positive regulation of cellular process	biological_process	0.97146	1	2	783	183	26932	2	Zm00001d043325,Zm00001d016714	0
GO:0044431	Golgi apparatus part	cellular_component	0.97164	1	2	783	194	26932	2	Zm00001d035494,Zm00001d015256	0
GO:0044707	single-multicellular organism process	biological_process	0.97184	1	7	783	448	26932	4	Zm00001d028165,Zm00001d026498,Novel01309,Zm00001d021962	3	Zm00001d032144,Novel01469,Zm00001d053895
GO:0010629	negative regulation of gene expression	biological_process	0.97186	1	1	783	131	26932	1	Zm00001d026300	0
GO:0000003	reproduction	biological_process	0.97219	1	1	783	120	26932	0		1	Novel01469
GO:0010035	response to inorganic substance	biological_process	0.97231	1	1	783	120	26932	0		1	Zm00001d012929
GO:0004672	protein kinase activity	molecular_function	0.97252	1	33	783	1596	26932	17	Zm00001d043512,Zm00001d003212,Zm00001d025255,Zm00001d038522,Zm00001d028613,Zm00001d032069,Zm00001d015032,Zm00001d042293,Zm00001d053876,Zm00001d008632,Zm00001d051323,Zm00001d052906,Zm00001d026018,Zm00001d018665,Zm00001d008477,Zm00001d026489,Zm00001d009473	16	Zm00001d012929,Zm00001d034555,Zm00001d043252,Zm00001d050074,Zm00001d026677,Zm00001d026139,Zm00001d041298,Zm00001d030551,Zm00001d053761,Zm00001d024744,Zm00001d051424,Zm00001d037811,Zm00001d021684,Zm00001d050466,Zm00001d013606,Zm00001d016242
GO:0072522	purine-containing compound biosynthetic process	biological_process	0.97282	1	1	783	120	26932	1	Zm00001d026685	0
GO:0010604	positive regulation of macromolecule metabolic process	biological_process	0.97411	1	1	783	122	26932	1	Zm00001d043325	0
GO:0032392	DNA geometric change	biological_process	0.97681	1	3	783	325	26932	0		3	Zm00001d015212,Zm00001d027245,Zm00001d027233
GO:0032508	DNA duplex unwinding	biological_process	0.97681	1	3	783	325	26932	0		3	Zm00001d027245,Zm00001d015212,Zm00001d027233
GO:0003678	DNA helicase activity	molecular_function	0.97736	1	3	783	326	26932	0		3	Zm00001d027233,Zm00001d027245,Zm00001d015212
GO:0006468	protein phosphorylation	biological_process	0.97838	1	35	783	1697	26932	18	Zm00001d042293,Zm00001d026360,Zm00001d053876,Zm00001d008632,Zm00001d043512,Zm00001d003212,Zm00001d025255,Zm00001d038522,Zm00001d028613,Zm00001d032069,Zm00001d015032,Zm00001d018665,Zm00001d026489,Zm00001d008477,Zm00001d009473,Zm00001d051323,Zm00001d052906,Zm00001d026018	17	Novel01087,Zm00001d030551,Zm00001d012929,Zm00001d034555,Zm00001d043252,Zm00001d050074,Zm00001d026677,Zm00001d026139,Zm00001d041298,Zm00001d013606,Zm00001d016242,Zm00001d053761,Zm00001d024744,Zm00001d051424,Zm00001d037811,Zm00001d021684,Zm00001d050466
GO:0042626	ATPase activity, coupled to transmembrane movement of substances	molecular_function	0.9785	1	1	783	145	26932	0		1	Zm00001d016794
GO:0008233	peptidase activity	molecular_function	0.97914	1	18	783	956	26932	5	Novel00755,Zm00001d002678,Zm00001d020886,Zm00001d007753,Zm00001d047634	13	Zm00001d021231,Zm00001d005859,Novel00789,Zm00001d051779,Zm00001d051850,Zm00001d002833,Zm00001d016477,Zm00001d021283,Zm00001d007391,Zm00001d049109,Zm00001d049113,Zm00001d031241,Zm00001d026521
GO:0044767	single-organism developmental process	biological_process	0.98092	1	7	783	471	26932	4	Zm00001d028165,Zm00001d026498,Zm00001d053926,Zm00001d021962	3	Novel01469,Zm00001d053895,Zm00001d032144
GO:0043170	macromolecule metabolic process	biological_process	0.98171	1	218	783	8526	26932	107	Zm00001d052906,Novel00029,Zm00001d051323,Zm00001d043025,Zm00001d039451,Zm00001d013489,Zm00001d008440,Zm00001d037969,Zm00001d026300,Zm00001d050247,Zm00001d026489,Novel01047,Zm00001d047634,Zm00001d025255,Zm00001d017720,Zm00001d007753,Zm00001d005030,Zm00001d006126,Zm00001d054015,Zm00001d006596,Zm00001d009939,Zm00001d017462,Zm00001d021962,Zm00001d002678,Novel01202,Zm00001d002263,Zm00001d014885,Zm0000…	111	Zm00001d001838,Zm00001d016159,Zm00001d015212,Zm00001d027925,Zm00001d050466,Zm00001d028984,Zm00001d015221,Zm00001d030339,Zm00001d016298,Zm00001d034160,Zm00001d050712,Zm00001d026182,Zm00001d014873,Zm00001d026096,Zm00001d026421,Zm00001d051252,Zm00001d005859,Zm00001d022526,Zm00001d042867,Zm00001d026392,Zm00001d045876,Novel00549,Zm00001d041298,Zm00001d008817,Novel01090,Zm00001d043252,Zm00001d037868,No…
GO:0032501	multicellular organismal process	biological_process	0.98193	1	8	783	524	26932	4	Zm00001d026498,Zm00001d028165,Zm00001d021962,Novel01309	4	Zm00001d043252,Novel01469,Zm00001d032144,Zm00001d053895
GO:0016820	hydrolase activity, acting on acid anhydrides, catalyzing transmembrane movement of substances	molecular_function	0.98208	1	1	783	151	26932	0		1	Zm00001d016794
GO:0016310	phosphorylation	biological_process	0.98238	1	52	783	2383	26932	22	Zm00001d018665,Zm00001d009473,Zm00001d008477,Zm00001d026489,Zm00001d044806,Zm00001d024138,Zm00001d052906,Zm00001d010375,Zm00001d051323,Zm00001d026018,Zm00001d033181,Zm00001d042293,Zm00001d026360,Zm00001d008632,Zm00001d053876,Zm00001d025255,Zm00001d003212,Zm00001d043512,Zm00001d032069,Zm00001d015032,Zm00001d028613,Zm00001d038522	30	Zm00001d033907,Zm00001d035916,Novel00848,Zm00001d013606,Zm00001d016242,Zm00001d051424,Zm00001d037811,Zm00001d024744,Zm00001d040084,Zm00001d036206,Zm00001d053761,Zm00001d021684,Zm00001d050466,Zm00001d041814,Zm00001d043652,Zm00001d030551,Novel01087,Zm00001d012707,Zm00001d031685,Zm00001d014772,Novel00789,Zm00001d051634,Zm00001d012929,Zm00001d034555,Zm00001d026677,Zm00001d041298,Zm00001d010321,Zm0000…
GO:0006464	cellular protein modification process	biological_process	0.9828	1	59	783	2668	26932	31	Zm00001d044734,Zm00001d048990,Zm00001d018665,Zm00001d008440,Zm00001d026489,Zm00001d008477,Zm00001d020437,Zm00001d023480,Zm00001d009473,Zm00001d051323,Zm00001d012335,Zm00001d052906,Zm00001d008209,Zm00001d024672,Zm00001d026018,Zm00001d042293,Zm00001d008632,Zm00001d053876,Zm00001d026360,Zm00001d053652,Zm00001d043512,Zm00001d003212,Zm00001d015344,Zm00001d025255,Zm00001d038522,Novel01559,Zm00001d02861…	28	Zm00001d050712,Zm00001d030339,Zm00001d016242,Zm00001d013052,Zm00001d013606,Zm00001d049966,Zm00001d053761,Zm00001d024744,Zm00001d051424,Zm00001d037811,Zm00001d016660,Zm00001d050466,Zm00001d021684,Novel01087,Zm00001d030551,Zm00001d050944,Zm00001d051608,Zm00001d034555,Zm00001d012929,Zm00001d053897,Zm00001d004109,Zm00001d050074,Zm00001d043252,Zm00001d026139,Zm00001d031241,Zm00001d041298,Zm00001d05063…
GO:0036211	protein modification process	biological_process	0.9828	1	59	783	2668	26932	31	Zm00001d053652,Zm00001d008632,Zm00001d053876,Zm00001d026360,Zm00001d042293,Zm00001d028613,Zm00001d015032,Zm00001d032069,Zm00001d054015,Zm00001d029847,Zm00001d038522,Novel01559,Zm00001d015344,Zm00001d025255,Zm00001d043512,Zm00001d003212,Zm00001d023480,Zm00001d009473,Zm00001d026489,Zm00001d008477,Zm00001d020437,Zm00001d018665,Zm00001d008440,Zm00001d048990,Zm00001d044734,Zm00001d024672,Zm00001d02601…	28	Zm00001d050944,Zm00001d030551,Novel01087,Zm00001d026139,Zm00001d041298,Zm00001d031241,Zm00001d050635,Zm00001d026677,Zm00001d004109,Zm00001d053897,Zm00001d043252,Zm00001d050074,Zm00001d051608,Zm00001d034555,Zm00001d012929,Zm00001d049966,Zm00001d016242,Zm00001d013052,Zm00001d013606,Zm00001d030339,Zm00001d050712,Zm00001d016660,Zm00001d050466,Zm00001d021684,Zm00001d024744,Zm00001d037811,Zm00001d05142…
GO:0006508	proteolysis	biological_process	0.98454	1	23	783	1190	26932	6	Zm00001d037969,Zm00001d002678,Zm00001d020886,Zm00001d007753,Zm00001d002263,Zm00001d047634	17	Zm00001d050944,Novel00789,Zm00001d021231,Zm00001d005859,Zm00001d051779,Zm00001d051850,Zm00001d016477,Zm00001d002833,Zm00001d021283,Zm00001d053897,Zm00001d007391,Zm00001d049109,Zm00001d049113,Zm00001d031241,Novel01090,Zm00001d026521,Zm00001d042867
GO:0035556	intracellular signal transduction	biological_process	0.98466	1	3	783	276	26932	1	Novel01296	2	Zm00001d042463,Zm00001d012128
GO:0043492	ATPase activity, coupled to movement of substances	molecular_function	0.98484	1	1	783	160	26932	0		1	Zm00001d016794
GO:0006281	DNA repair	biological_process	0.98492	1	6	783	509	26932	0		6	Novel01082,Zm00001d027233,Zm00001d027245,Zm00001d015212,Zm00001d016801,Zm00001d014568
GO:0009791	post-embryonic development	biological_process	0.98553	1	2	783	219	26932	1	Zm00001d021962	1	Zm00001d053895
GO:1902589	single-organism organelle organization	biological_process	0.9856	1	9	783	660	26932	3	Zm00001d032131,Zm00001d033181,Zm00001d043325	6	Novel01090,Zm00001d027245,Zm00001d050944,Zm00001d027233,Zm00001d035629,Novel01812
GO:0016301	kinase activity	molecular_function	0.9859	1	47	783	2216	26932	22	Zm00001d033181,Zm00001d026018,Zm00001d051323,Zm00001d010375,Zm00001d052906,Zm00001d024138,Zm00001d026489,Zm00001d008477,Zm00001d044806,Zm00001d009473,Zm00001d018665,Zm00001d038522,Zm00001d028613,Zm00001d032069,Zm00001d015032,Zm00001d043512,Zm00001d003212,Zm00001d025255,Zm00001d053876,Zm00001d008632,Zm00001d026360,Zm00001d042293	25	Zm00001d041814,Zm00001d043652,Zm00001d050466,Zm00001d021684,Zm00001d053761,Zm00001d036206,Zm00001d024744,Zm00001d051424,Zm00001d037811,Zm00001d016242,Zm00001d013606,Zm00001d035916,Zm00001d033907,Zm00001d043252,Zm00001d050074,Zm00001d026139,Zm00001d041298,Zm00001d010321,Zm00001d026677,Zm00001d034555,Zm00001d012929,Zm00001d051634,Zm00001d031685,Zm00001d012707,Zm00001d030551
GO:0022414	reproductive process	biological_process	0.98595	1	4	783	335	26932	1	Zm00001d021962	3	Zm00001d043252,Novel01469,Zm00001d053895
GO:0006996	organelle organization	biological_process	0.98644	1	17	783	1028	26932	10	Zm00001d038851,Zm00001d033181,Zm00001d027919,Zm00001d017720,Zm00001d017130,Zm00001d032131,Zm00001d034479,Zm00001d021422,Zm00001d049743,Zm00001d043325	7	Novel01090,Zm00001d027245,Zm00001d015212,Novel01812,Zm00001d050944,Zm00001d027233,Zm00001d035629
GO:0043412	macromolecule modification	biological_process	0.98715	1	62	783	2821	26932	34	Zm00001d038522,Novel01559,Zm00001d028613,Zm00001d032069,Zm00001d015032,Zm00001d054015,Zm00001d029847,Zm00001d043512,Zm00001d003212,Zm00001d015344,Zm00001d025255,Zm00001d036396,Zm00001d053876,Zm00001d008632,Zm00001d026360,Zm00001d053652,Zm00001d042293,Zm00001d008209,Zm00001d024672,Zm00001d026018,Zm00001d051323,Zm00001d052906,Zm00001d012335,Zm00001d026489,Zm00001d008477,Zm00001d020437,Zm00001d05295…	28	Zm00001d053897,Zm00001d004109,Zm00001d043252,Zm00001d050074,Zm00001d026139,Zm00001d041298,Zm00001d031241,Zm00001d050635,Zm00001d026677,Zm00001d051608,Zm00001d034555,Zm00001d012929,Zm00001d050944,Novel01087,Zm00001d030551,Zm00001d016660,Zm00001d050466,Zm00001d021684,Zm00001d053761,Zm00001d024744,Zm00001d051424,Zm00001d037811,Zm00001d016242,Zm00001d013052,Zm00001d013606,Zm00001d049966,Zm00001d05071…
GO:0000723	telomere maintenance	biological_process	0.98907	1	2	783	296	26932	0		2	Zm00001d027233,Zm00001d027245
GO:0032200	telomere organization	biological_process	0.98907	1	2	783	296	26932	0		2	Zm00001d027245,Zm00001d027233
GO:0060249	anatomical structure homeostasis	biological_process	0.98936	1	2	783	297	26932	0		2	Zm00001d027233,Zm00001d027245
GO:0032502	developmental process	biological_process	0.99001	1	7	783	505	26932	4	Zm00001d028165,Zm00001d026498,Zm00001d021962,Zm00001d053926	3	Zm00001d032144,Zm00001d053895,Novel01469
GO:0098588	bounding membrane of organelle	cellular_component	0.99024	1	7	783	508	26932	3	Zm00001d008623,Zm00001d035494,Zm00001d015256	4	Novel00092,Zm00001d051362,Zm00001d014772,Zm00001d025660
GO:0016772	transferase activity, transferring phosphorus-containing groups	molecular_function	0.99024	1	54	783	2538	26932	22	Zm00001d042293,Zm00001d053876,Zm00001d008632,Zm00001d026360,Zm00001d025255,Zm00001d043512,Zm00001d003212,Zm00001d028613,Zm00001d015032,Zm00001d032069,Zm00001d038522,Zm00001d018665,Zm00001d009473,Zm00001d024138,Zm00001d026489,Zm00001d044806,Zm00001d008477,Zm00001d052906,Zm00001d051323,Zm00001d010375,Zm00001d033181,Zm00001d026018	32	Zm00001d030551,Zm00001d014674,Zm00001d012707,Novel01087,Zm00001d031685,Zm00001d051634,Zm00001d051608,Zm00001d034555,Zm00001d012929,Zm00001d026139,Zm00001d041298,Zm00001d010321,Zm00001d026677,Zm00001d050074,Zm00001d043252,Zm00001d033907,Zm00001d035916,Zm00001d026421,Zm00001d016242,Zm00001d013606,Zm00001d024744,Zm00001d051424,Zm00001d037811,Zm00001d014568,Zm00001d036206,Zm00001d053761,Zm00001d05046…
GO:0016043	cellular component organization	biological_process	0.99066	1	31	783	1641	26932	17	Zm00001d015256,Zm00001d043325,Zm00001d052902,Zm00001d049743,Zm00001d053926,Zm00001d034479,Zm00001d035494,Zm00001d013114,Zm00001d021422,Zm00001d032131,Zm00001d017130,Zm00001d017751,Zm00001d017720,Zm00001d042044,Zm00001d038851,Zm00001d027919,Zm00001d033181	14	Zm00001d035629,Zm00001d027233,Zm00001d046127,Zm00001d050944,Zm00001d032992,Novel01812,Zm00001d035899,Zm00001d024071,Zm00001d015212,Novel01469,Zm00001d037868,Zm00001d047276,Novel01090,Zm00001d027245
GO:0005783	endoplasmic reticulum	cellular_component	0.9917	1	3	783	295	26932	2	Zm00001d015747,Zm00001d008623	1	Zm00001d016060
GO:0016787	hydrolase activity	molecular_function	0.99265	1	100	783	4377	26932	39	Zm00001d015870,Zm00001d016963,Zm00001d015129,Zm00001d014840,Zm00001d006596,Novel01296,Zm00001d007753,Zm00001d047634,Zm00001d042974,Zm00001d017720,Zm00001d053876,Zm00001d011886,Zm00001d021647,Zm00001d020744,Zm00001d002678,Zm00001d020886,Zm00001d009936,Zm00001d031813,Zm00001d039451,Zm00001d029390,Zm00001d011315,Zm00001d024138,Zm00001d034887,Zm00001d002937,Zm00001d020811,Zm00001d017751,Zm00001d02787…	61	Zm00001d013276,Zm00001d016396,Zm00001d049113,Zm00001d012159,Zm00001d033079,Zm00001d037492,Zm00001d003690,Zm00001d023840,Zm00001d024037,Novel00789,Zm00001d026669,Zm00001d032992,Zm00001d031934,Zm00001d037828,Zm00001d012707,Zm00001d015783,Zm00001d022630,Zm00001d002833,Zm00001d015212,Zm00001d046134,Zm00001d005859,Zm00001d011477,Zm00001d016794,Zm00001d011006,Zm00001d013573,Zm00001d009876,Zm00001d02198…
GO:0033554	cellular response to stress	biological_process	0.99272	1	7	783	601	26932	1	Zm00001d014885	6	Zm00001d016801,Zm00001d014568,Zm00001d015212,Zm00001d027245,Zm00001d027233,Novel01082
GO:0006644	phospholipid metabolic process	biological_process	0.99295	1	1	783	177	26932	0		1	Zm00001d014292
GO:0005789	endoplasmic reticulum membrane	cellular_component	0.99325	1	1	783	170	26932	1	Zm00001d008623	0
GO:0042175	nuclear outer membrane-endoplasmic reticulum membrane network	cellular_component	0.99346	1	1	783	171	26932	1	Zm00001d008623	0
GO:0006259	DNA metabolic process	biological_process	0.99393	1	10	783	760	26932	2	Zm00001d017720,Zm00001d014885	8	Zm00001d015212,Novel01082,Zm00001d027233,Zm00001d014568,Zm00001d016801,Novel00159,Novel01090,Zm00001d027245
GO:0044432	endoplasmic reticulum part	cellular_component	0.99417	1	1	783	175	26932	1	Zm00001d008623	0
GO:0007275	multicellular organismal development	biological_process	0.99425	1	5	783	431	26932	3	Zm00001d021962,Zm00001d026498,Zm00001d028165	2	Zm00001d032144,Zm00001d053895
GO:0071840	cellular component organization or biogenesis	biological_process	0.99505	1	34	783	1817	26932	20	Zm00001d038851,Zm00001d027919,Zm00001d017751,Zm00001d017720,Zm00001d042044,Zm00001d034479,Zm00001d053926,Zm00001d021422,Zm00001d013114,Zm00001d035494,Zm00001d017130,Zm00001d015256,Zm00001d043325,Zm00001d052902,Zm00001d049743,Zm00001d033181,Zm00001d003618,Zm00001d032131,Zm00001d052952,Zm00001d002483	14	Novel01469,Zm00001d047276,Zm00001d037868,Novel01090,Novel01812,Zm00001d024071,Zm00001d050944,Zm00001d032992,Zm00001d035629,Zm00001d027233,Zm00001d027245,Zm00001d035899,Zm00001d015212,Zm00001d046127
GO:0019538	protein metabolic process	biological_process	0.99529	1	115	783	4931	26932	58	Zm00001d015344,Zm00001d003212,Zm00001d043512,Zm00001d032069,Zm00001d028613,Zm00001d029847,Zm00001d027919,Novel01559,Zm00001d016866,Zm00001d042293,Zm00001d027271,Zm00001d035937,Zm00001d036129,Zm00001d053652,Zm00001d034724,Zm00001d052809,Zm00001d008632,Zm00001d018096,Zm00001d002263,Zm00001d029997,Zm00001d007092,Zm00001d026018,Zm00001d015037,Zm00001d045544,Zm00001d000399,Zm00001d018665,Zm00001d04473…	57	Zm00001d026521,Zm00001d034555,Zm00001d015917,Zm00001d045320,Zm00001d012929,Zm00001d031241,Zm00001d026139,Zm00001d026677,Zm00001d050635,Zm00001d053897,Zm00001d004109,Zm00001d050074,Zm00001d016850,Zm00001d030551,Zm00001d021231,Zm00001d041389,Zm00001d024744,Zm00001d053761,Zm00001d021684,Zm00001d007391,Zm00001d021283,Zm00001d049109,Novel00972,Zm00001d016477,Zm00001d051850,Zm00001d051779,Zm00001d01624…
GO:0008270	zinc ion binding	molecular_function	0.99662	1	24	783	1365	26932	11	Zm00001d013644,Zm00001d028616,Zm00001d052640,Zm00001d045051,Zm00001d039193,Zm00001d009106,Zm00001d048451,Zm00001d015037,Zm00001d017653,Zm00001d014885,Zm00001d024314	13	Zm00001d041730,Zm00001d021038,Zm00001d029806,Zm00001d039377,Zm00001d049059,Zm00001d018190,Zm00001d047837,Zm00001d005630,Zm00001d016164,Zm00001d032090,Zm00001d024200,Zm00001d051501,Zm00001d043613
GO:0051716	cellular response to stimulus	biological_process	0.99679	1	20	783	1271	26932	7	Zm00001d043325,Zm00001d018332,Novel01296,Zm00001d014885,Novel01047,Zm00001d012335,Zm00001d028165	13	Novel01082,Zm00001d027233,Zm00001d012128,Zm00001d011328,Zm00001d042345,Zm00001d014568,Zm00001d016801,Zm00001d016277,Zm00001d015212,Novel01469,Zm00001d042463,Novel00972,Zm00001d027245
GO:0004722	protein serine/threonine phosphatase activity	molecular_function	0.99752	1	1	783	196	26932	1	Zm00001d048990	0
GO:0043233	organelle lumen	cellular_component	0.99841	1	2	783	302	26932	2	Zm00001d017187,Zm00001d052952	0
GO:0070013	intracellular organelle lumen	cellular_component	0.99841	1	2	783	302	26932	2	Zm00001d052952,Zm00001d017187	0
GO:0042578	phosphoric ester hydrolase activity	molecular_function	0.99842	1	4	783	420	26932	3	Zm00001d010373,Zm00001d048990,Zm00001d034887	1	Zm00001d050917
GO:0031974	membrane-enclosed lumen	cellular_component	0.99862	1	2	783	307	26932	2	Zm00001d017187,Zm00001d052952	0
GO:0016791	phosphatase activity	molecular_function	0.99877	1	3	783	365	26932	3	Zm00001d048990,Zm00001d034887,Zm00001d010373	0
GO:0004386	helicase activity	molecular_function	0.99885	1	4	783	524	26932	1	Zm00001d024138	3	Zm00001d015212,Zm00001d027245,Zm00001d027233
GO:0012505	endomembrane system	cellular_component	0.99927	1	7	783	646	26932	4	Zm00001d008623,Zm00001d015747,Zm00001d035494,Zm00001d015256	3	Zm00001d048583,Zm00001d016060,Zm00001d013052
GO:0006796	phosphate-containing compound metabolic process	biological_process	0.99933	1	62	783	3100	26932	28	Zm00001d026685,Zm00001d042293,Zm00001d026360,Zm00001d008632,Zm00001d053876,Zm00001d025255,Zm00001d043512,Zm00001d003212,Zm00001d028613,Zm00001d032069,Zm00001d015032,Zm00001d016866,Zm00001d038522,Zm00001d018665,Zm00001d034887,Novel00672,Zm00001d048990,Zm00001d009473,Zm00001d044806,Zm00001d026489,Zm00001d008477,Zm00001d024138,Zm00001d052906,Zm00001d010375,Zm00001d051323,Zm00001d033181,Zm00001d02601…	34	Zm00001d030551,Zm00001d016850,Zm00001d012707,Novel01087,Zm00001d031685,Zm00001d014772,Novel00789,Zm00001d051634,Zm00001d012929,Zm00001d051608,Zm00001d034555,Zm00001d026677,Zm00001d026139,Zm00001d041298,Zm00001d010321,Zm00001d050074,Zm00001d043252,Zm00001d033907,Zm00001d035916,Novel00848,Zm00001d013606,Zm00001d016242,Zm00001d014292,Zm00001d024744,Zm00001d037811,Zm00001d051424,Zm00001d040084,Zm0000…
GO:0006793	phosphorus metabolic process	biological_process	0.99941	1	62	783	3112	26932	28	Zm00001d034887,Zm00001d048990,Novel00672,Zm00001d018665,Zm00001d044806,Zm00001d026489,Zm00001d008477,Zm00001d024138,Zm00001d009473,Zm00001d010375,Zm00001d051323,Zm00001d052906,Zm00001d010373,Zm00001d026018,Zm00001d033181,Zm00001d026685,Zm00001d042293,Zm00001d026360,Zm00001d053876,Zm00001d008632,Zm00001d003212,Zm00001d043512,Zm00001d025255,Zm00001d016866,Zm00001d038522,Zm00001d015032,Zm00001d03206…	34	Zm00001d035916,Zm00001d033907,Zm00001d013606,Zm00001d016242,Novel00848,Zm00001d040084,Zm00001d053761,Zm00001d036206,Zm00001d014292,Zm00001d037811,Zm00001d051424,Zm00001d024744,Zm00001d015008,Zm00001d043652,Zm00001d041814,Zm00001d021684,Zm00001d050466,Novel01087,Zm00001d012707,Zm00001d030551,Zm00001d016850,Zm00001d014772,Novel00789,Zm00001d031685,Zm00001d012929,Zm00001d034555,Zm00001d051608,Zm0000…
GO:0031981	nuclear lumen	cellular_component	0.99944	1	1	783	260	26932	1	Zm00001d052952	0
GO:0016311	dephosphorylation	biological_process	0.99953	1	3	783	404	26932	3	Zm00001d034887,Zm00001d048990,Zm00001d010373	0
GO:0004721	phosphoprotein phosphatase activity	molecular_function	0.99971	1	1	783	270	26932	1	Zm00001d048990	0
GO:0006470	protein dephosphorylation	biological_process	0.99978	1	1	783	278	26932	1	Zm00001d048990	0
