# Supplementary material for: Comparative transcriptome analysis of differentially expressed genes related to the physiological changes of yellow-green leaf mutant of maize
Source: PeerJ. 2021 Feb 16;9:e10567. doi: 10.7717/peerj.10567 (PMC7894110; doi:10.7717/peerj.10567)
Supplement: Supplemental Information 4 [file peerj-09-10567-s004.xlsx]

## Sheet: Table S4
##Databases: KEGG PATHWAY
##Statistical test method: hypergeometric test / Fisher's exact test
##FDR correction method: Benjamini and Hochberg
#Term	Database	ID	Input number	Background number	P-Value	Corrected P-Value	Input	KEGG_ID/KO	Entrez_ID	Hyperlink
Butanoate metabolism	KEGG PATHWAY	zma00650	7	33	0.000544096	0.0531222	Zm00001d047981|Zm00001d031212|Zm00001d015404|Zm00001d003522|Zm00001d015445|Zm00001d015444|Zm00001d037507	zma:100381655|zma:101202696|zma:100284047|zma:100273302|zma:100282236|zma:100282236|zma:100282236|	100381655|101202696|100284047|100273302|100282236|100282236|100282236|	http://www.genome.jp/kegg-bin/show_pathway?zma00650/zma:101202696%09red/zma:100273302%09red/zma:100284047%09red/zma:100381655%09red/zma:100282236%09red
Porphyrin and chlorophyll metabolism	KEGG PATHWAY	zma00860	9	64	0.00130935	0.0531222	Zm00001d004531|Zm00001d026277|Zm00001d015037|Zm00001d008203|Zm00001d013013|Zm00001d002358|Zm00001d031934|Zm00001d001820|Zm00001d044321	zma:100284976|zma:100500943|zma:100383787|zma:542554|zma:103625782|zma:100500945|zma:100383045|zma:100194154|zma:100383208|	100284976|100500943|100383787|542554|103625782|100500945|100383045|100194154|100383208|	http://www.genome.jp/kegg-bin/show_pathway?zma00860/zma:100500943%09red/zma:100500945%09red/zma:100383208%09red/zma:100383045%09red/zma:100284976%09red/zma:100383787%09red/zma:103625782%09red/zma:100194154%09red/zma:542554%09red
Biosynthesis of secondary metabolites	KEGG PATHWAY	zma01110	79	1481	0.00162619	0.0531222	Zm00001d014945|Zm00001d023863|Zm00001d036206|Zm00001d028572|Zm00001d013644|Zm00001d041082|Zm00001d008370|Zm00001d025923|Zm00001d044321|Zm00001d018181|Zm00001d021050|Zm00001d013035|Zm00001d021981|Zm00001d040084|Zm00001d008623|Zm00001d013013|Zm00001d016438|Zm00001d047981|Zm00001d049059|Zm00001d031449|Zm00001d001820|Zm00001d029822|Zm00001d045261|Zm00001d008427|Zm00001d001960|Zm00001d012972|Zm00001d0…	zma:100193279|zma:100282978|zma:103629493|zma:100274383|zma:541714|zma:100279558|zma:100502524|zma:100282122|zma:100383208|zma:103627785|zma:100283478|zma:100282501|zma:103634365|zma:100286050|zma:100383128|zma:103625782|zma:100285225|zma:100381655|zma:542364|zma:103642039|zma:100194154|zma:103637620|zma:541669|zma:103634738|zma:542712|zma:100275381|zma:100500943|zma:103653517|zma:103638615|zma:1…	100193279|100282978|103629493|100274383|541714|100279558|100502524|100282122|100383208|103627785|100283478|100282501|103634365|100286050|100383128|103625782|100285225|100381655|542364|103642039|100194154|103637620|541669|103634738|542712|100275381|100500943|103653517|103638615|107521951|100191272|103626841|103650282|100281688|100193709|100274288|100170240|100304292|100280071|100273283|103646899|1…	http://www.genome.jp/kegg-bin/show_pathway?zma01110/zma:100273258%09red/zma:100275381%09red/zma:103632470%09red/zma:101202696%09red/zma:100125646%09red/zma:100279558%09red/zma:542165%09red/zma:103630917%09red/zma:103642039%09red/zma:542137%09red/zma:100274383%09red/zma:541714%09red/zma:100284976%09red/zma:100383787%09red/zma:100273302%09red/zma:100285076%09red/zma:103635254%09red/zma:103626841%09…
Folate biosynthesis	KEGG PATHWAY	zma00790	4	22	0.0138761	0.339965	Zm00001d016850|Zm00001d016006|Zm00001d016866|Zm00001d026531	zma:100281638|zma:103626932|zma:100272516|zma:100193984|	100281638|103626932|100272516|100193984|	http://www.genome.jp/kegg-bin/show_pathway?zma00790/zma:100281638%09red/zma:100193984%09red/zma:103626932%09red/zma:100272516%09red
Glyoxylate and dicarboxylate metabolism	KEGG PATHWAY	zma00630	9	110	0.0301959	0.59184	GRMZM5G815453|Zm00001d054044|Zm00001d031212|Zm00001d034887|Zm00001d000279|Zm00001d023437|Zm00001d014919|Zm00001d015870|Zm00001d015497	zma:845212|zma:542370|zma:101202696|zma:100191272|zma:845212|zma:541946|zma:100193709|zma:100217054|zma:103646899|	845212|542370|101202696|100191272|845212|541946|100193709|100217054|103646899|	http://www.genome.jp/kegg-bin/show_pathway?zma00630/zma:542370%09red/zma:100193709%09red/zma:101202696%09red/zma:100191272%09red/zma:845212%09red/zma:541946%09red/zma:103646899%09red/zma:100217054%09red
Alanine, aspartate and glutamate metabolism	KEGG PATHWAY	zma00250	7	80	0.039631	0.645115	Zm00001d047981|Zm00001d027876|Zm00001d015404|Zm00001d037507|Zm00001d015445|Zm00001d015444|Zm00001d003522	zma:100381655|zma:100280276|zma:100284047|zma:100282236|zma:100282236|zma:100282236|zma:100273302|	100381655|100280276|100284047|100282236|100282236|100282236|100273302|	http://www.genome.jp/kegg-bin/show_pathway?zma00250/zma:100273302%09red/zma:100284047%09red/zma:100381655%09red/zma:100280276%09red/zma:100282236%09red
Glutathione metabolism	KEGG PATHWAY	zma00480	10	139	0.0466023	0.645115	Zm00001d042098|Zm00001d026154|Zm00001d043344|Zm00001d018220|Novel01679|Zm00001d024839|Zm00001d025288|Zm00001d030685|Zm00001d016802|Zm00001d002263	zma:103650740|zma:100280060|zma:542740|zma:541837|zma:542388|zma:542311|zma:100304292|zma:103637520|zma:100283135|zma:103634379|	103650740|100280060|542740|541837|542388|542311|100304292|103637520|100283135|103634379|	http://www.genome.jp/kegg-bin/show_pathway?zma00480/zma:542311%09red/zma:542388%09red/zma:103634379%09red/zma:100304292%09red/zma:541837%09red/zma:100283135%09red/zma:100280060%09red/zma:103637520%09red/zma:103650740%09red/zma:542740%09red
Tryptophan metabolism	KEGG PATHWAY	zma00380	5	55	0.0674772	0.645115	Zm00001d017418|Zm00001d054044|Zm00001d031212|Zm00001d049289|Zm00001d008700	zma:100280692|zma:542370|zma:101202696|zma:103653517|zma:103634861|	100280692|542370|101202696|103653517|103634861|	http://www.genome.jp/kegg-bin/show_pathway?zma00380/zma:101202696%09red/zma:103634861%09red/zma:103653517%09red/zma:542370%09red/zma:100280692%09red
Benzoxazinoid biosynthesis	KEGG PATHWAY	zma00402	2	10	0.0689408	0.645115	Zm00001d049179|Zm00001d034461	zma:100147731|zma:100273163|	100147731|100273163|	http://www.genome.jp/kegg-bin/show_pathway?zma00402/zma:100273163%09red/zma:100147731%09red
Ascorbate and aldarate metabolism	KEGG PATHWAY	zma00053	5	57	0.07546	0.645115	Zm00001d017418|Zm00001d030685|Zm00001d014674|Zm00001d049289|Zm00001d016802	zma:100280692|zma:103637520|zma:100382378|zma:103653517|zma:100283135|	100280692|103637520|100382378|103653517|100283135|	http://www.genome.jp/kegg-bin/show_pathway?zma00053/zma:103637520%09red/zma:100382378%09red/zma:100283135%09red/zma:103653517%09red/zma:100280692%09red
Cyanoamino acid metabolism	KEGG PATHWAY	zma00460	5	57	0.07546	0.645115	Zm00001d015870|Zm00001d012159|Zm00001d051214|Zm00001d024037|Zm00001d033649	zma:100217054|zma:100280071|zma:542093|zma:732807|zma:100274288|	100217054|100280071|542093|732807|100274288|	http://www.genome.jp/kegg-bin/show_pathway?zma00460/zma:100274288%09red/zma:100217054%09red/zma:732807%09red/zma:100280071%09red/zma:542093%09red
Pentose and glucuronate interconversions	KEGG PATHWAY	zma00040	6	76	0.0789936	0.645115	Zm00001d015008|Zm00001d014674|Zm00001d021050|Zm00001d017418|Zm00001d032992|Zm00001d017416	zma:100191463|zma:100382378|zma:100283478|zma:100280692|zma:100284984|zma:100283618|	100191463|100382378|100283478|100280692|100284984|100283618|	http://www.genome.jp/kegg-bin/show_pathway?zma00040/zma:100283478%09red/zma:100191463%09red/zma:100283618%09red/zma:100280692%09red/zma:100284984%09red/zma:100382378%09red
Galactose metabolism	KEGG PATHWAY	zma00052	6	80	0.0942556	0.68729	Zm00001d015008|Zm00001d036206|Zm00001d014674|Zm00001d025943|Zm00001d010375|Zm00001d025354	zma:100191463|zma:103629493|zma:100382378|zma:100383472|zma:100281688|zma:100285169|	100191463|103629493|100382378|100383472|100281688|100285169|	http://www.genome.jp/kegg-bin/show_pathway?zma00052/zma:100281688%09red/zma:100191463%09red/zma:100285169%09red/zma:103629493%09red/zma:100382378%09red/zma:100383472%09red
Plant-pathogen interaction	KEGG PATHWAY	zma04626	12	209	0.111308	0.68729	Zm00001d003212|Zm00001d043144|Zm00001d020722|Zm00001d043025|Zm00001d014649|Zm00001d052809|Zm00001d014271|Zm00001d038023|Zm00001d026018|Zm00001d026139|Zm00001d029558|Zm00001d043543	zma:100273422|zma:100502442|zma:100282485|zma:100279301|zma:103626398|zma:100383793|zma:100283515|zma:100281558|zma:100384476|zma:100285607|zma:103636577|zma:100037794|	100273422|100502442|100282485|100279301|103626398|100383793|100283515|100281558|100384476|100285607|103636577|100037794|	http://www.genome.jp/kegg-bin/show_pathway?zma04626/zma:103636577%09red/zma:100384476%09red/zma:100282485%09red/zma:100283515%09red/zma:100383793%09red/zma:100502442%09red/zma:100285607%09red/zma:100037794%09red/zma:100279301%09red/zma:100281558%09red/zma:100273422%09red/zma:103626398%09red
Sulfur relay system	KEGG PATHWAY	zma04122	2	14	0.114029	0.68729	Zm00001d016850|Zm00001d016866	zma:100281638|zma:100272516|	100281638|100272516|	http://www.genome.jp/kegg-bin/show_pathway?zma04122/zma:100281638%09red/zma:100272516%09red
Diterpenoid biosynthesis	KEGG PATHWAY	zma00904	3	30	0.118086	0.68729	Zm00001d046342|Zm00001d029648|Zm00001d041082	zma:103638615|zma:542165|zma:100279558|	103638615|542165|100279558|	http://www.genome.jp/kegg-bin/show_pathway?zma00904/zma:103638615%09red/zma:100279558%09red/zma:542165%09red
Cutin, suberine and wax biosynthesis	KEGG PATHWAY	zma00073	3	31	0.126196	0.68729	Zm00001d051800|Zm00001d028252|Zm00001d019850	zma:100856953|zma:100285543|zma:100501369|	100856953|100285543|100501369|	http://www.genome.jp/kegg-bin/show_pathway?zma00073/zma:100285543%09red/zma:100856953%09red/zma:100501369%09red
Riboflavin metabolism	KEGG PATHWAY	zma00740	2	15	0.126237	0.68729	Zm00001d023863|Zm00001d016963	zma:100282978|zma:100304324|	100282978|100304324|	http://www.genome.jp/kegg-bin/show_pathway?zma00740/zma:100282978%09red/zma:100304324%09red
Linoleic acid metabolism	KEGG PATHWAY	zma00591	2	16	0.138735	0.715582	Zm00001d031449|Zm00001d033623	zma:103642039|zma:542495|	103642039|542495|	http://www.genome.jp/kegg-bin/show_pathway?zma00591/zma:103642039%09red/zma:542495%09red
beta-Alanine metabolism	KEGG PATHWAY	zma00410	4	55	0.168268	0.760754	Zm00001d017418|Zm00001d003522|Zm00001d047981|Zm00001d049289	zma:100280692|zma:100273302|zma:100381655|zma:103653517|	100280692|100273302|100381655|103653517|	http://www.genome.jp/kegg-bin/show_pathway?zma00410/zma:103653517%09red/zma:100273302%09red/zma:100381655%09red/zma:100280692%09red
Protein export	KEGG PATHWAY	zma03060	5	76	0.173875	0.760754	Zm00001d026467|Zm00001d042044|Zm00001d051850|Novel01879|Zm00001d026521	zma:103641707|zma:542753|zma:103654093|zma:103651507|zma:100280858|	103641707|542753|103654093|103651507|100280858|	http://www.genome.jp/kegg-bin/show_pathway?zma03060/zma:103641707%09red/zma:103654093%09red/zma:100280858%09red/zma:542753%09red/zma:103651507%09red
Taurine and hypotaurine metabolism	KEGG PATHWAY	zma00430	2	19	0.177612	0.760754	Zm00001d003522|Zm00001d047981	zma:100273302|zma:100381655|	100273302|100381655|	http://www.genome.jp/kegg-bin/show_pathway?zma00430/zma:100273302%09red/zma:100381655%09red
Ether lipid metabolism	KEGG PATHWAY	zma00565	3	37	0.178544	0.760754	Zm00001d012924|Zm00001d015256|Novel00820	zma:100384160|zma:103630917|zma:103626841|	100384160|103630917|103626841|	http://www.genome.jp/kegg-bin/show_pathway?zma00565/zma:100384160%09red/zma:103630917%09red/zma:103626841%09red
Fatty acid degradation	KEGG PATHWAY	zma00071	4	59	0.197665	0.807131	Zm00001d017418|Zm00001d049059|Zm00001d031212|Zm00001d049289	zma:100280692|zma:542364|zma:101202696|zma:103653517|	100280692|542364|101202696|103653517|	http://www.genome.jp/kegg-bin/show_pathway?zma00071/zma:101202696%09red/zma:542364%09red/zma:103653517%09red/zma:100280692%09red
Lysine degradation	KEGG PATHWAY	zma00310	3	41	0.216192	0.811465	Zm00001d017418|Zm00001d031212|Zm00001d049289	zma:100280692|zma:101202696|zma:103653517|	100280692|101202696|103653517|	http://www.genome.jp/kegg-bin/show_pathway?zma00310/zma:101202696%09red/zma:103653517%09red/zma:100280692%09red
Pentose phosphate pathway	KEGG PATHWAY	zma00030	5	83	0.218588	0.811465	Zm00001d025288|Zm00001d040084|Zm00001d036206|Zm00001d021050|Zm00001d010375	zma:100304292|zma:100286050|zma:103629493|zma:100283478|zma:100281688|	100304292|100286050|103629493|100283478|100281688|	http://www.genome.jp/kegg-bin/show_pathway?zma00030/zma:100304292%09red/zma:100283478%09red/zma:100281688%09red/zma:103629493%09red/zma:100286050%09red
Metabolic pathways	KEGG PATHWAY	zma01100	106	2609	0.234302	0.811465	Novel01309|Zm00001d041082|Zm00001d017418|Zm00001d013013|Zm00001d013644|Zm00001d042600|Zm00001d024843|Zm00001d031449|Zm00001d024752|Zm00001d010321|Zm00001d040705|Novel01044|Zm00001d037507|Zm00001d033649|Zm00001d016850|Zm00001d025354|Zm00001d026531|Zm00001d028165|Zm00001d025690|Zm00001d015037|Zm00001d045261|Zm00001d003817|Zm00001d009373|Zm00001d015445|Zm00001d029822|Zm00001d036206|Zm00001d008700|Zm…	zma:100192477|zma:100279558|zma:100280692|zma:103625782|zma:541714|zma:100277932|zma:542136|zma:103642039|zma:100273104|zma:103635678|zma:100273283|zma:103627197|zma:100282236|zma:100274288|zma:100281638|zma:100285169|zma:100193984|zma:103632470|zma:542698|zma:100383787|zma:541669|zma:542342|zma:103635254|zma:100282236|zma:103637620|zma:103629493|zma:103634861|zma:100383208|zma:100282501|zma:1001…	100192477|100279558|100280692|103625782|541714|100277932|542136|103642039|100273104|103635678|100273283|103627197|100282236|100274288|100281638|100285169|100193984|103632470|542698|100383787|541669|542342|103635254|100282236|103637620|103629493|103634861|100383208|100282501|100194154|100286064|103634379|100191463|100381655|100191272|100304292|100280071|100273258|542554|100275381|100304324|1001936…	http://www.genome.jp/kegg-bin/show_pathway?zma01100/zma:101202696%09red/zma:100279620%09red/zma:100383787%09red/zma:100273302%09red/zma:103626841%09red/zma:100383208%09red/zma:100304324%09red/zma:103634379%09red/zma:100283208%09red/zma:542698%09red/zma:100282978%09red/zma:100193279%09red/zma:103627785%09red/zma:100194154%09red/zma:100281336%09red/zma:542093%09red/zma:100273258%09red/zma:100273104…
Flavonoid biosynthesis	KEGG PATHWAY	zma00941	3	44	0.245415	0.811465	Zm00001d018181|Zm00001d012972|Zm00001d001960	zma:103627785|zma:100275381|zma:542712|	103627785|100275381|542712|	http://www.genome.jp/kegg-bin/show_pathway?zma00941/zma:542712%09red/zma:103627785%09red/zma:100275381%09red
Starch and sucrose metabolism	KEGG PATHWAY	zma00500	12	251	0.254758	0.811465	Zm00001d015008|Zm00001d025943|Zm00001d025354|Zm00001d024037|Zm00001d032992|Zm00001d045261|Novel00356|Zm00001d033649|Zm00001d034074|Zm00001d012159|Zm00001d003817|Zm00001d042514	zma:100191463|zma:100383472|zma:100285169|zma:732807|zma:100284984|zma:541669|zma:542342|zma:100274288|zma:100170240|zma:100280071|zma:542342|zma:100285419|	100191463|100383472|100285169|732807|100284984|541669|542342|100274288|100170240|100280071|542342|100285419|	http://www.genome.jp/kegg-bin/show_pathway?zma00500/zma:100170240%09red/zma:100274288%09red/zma:100191463%09red/zma:542342%09red/zma:100285419%09red/zma:100280071%09red/zma:541669%09red/zma:732807%09red/zma:100285169%09red/zma:100284984%09red/zma:100383472%09red
Fatty acid elongation	KEGG PATHWAY	zma00062	3	45	0.255294	0.811465	Zm00001d008623|Zm00001d005430|Zm00001d016438	zma:100383128|zma:103649090|zma:100285225|	100383128|103649090|100285225|	http://www.genome.jp/kegg-bin/show_pathway?zma00062/zma:100285225%09red/zma:100383128%09red/zma:103649090%09red
Carbon metabolism	KEGG PATHWAY	zma01200	17	372	0.256688	0.811465	GRMZM5G815453|Zm00001d054044|Zm00001d036206|Zm00001d031212|Zm00001d025690|Zm00001d021050|Zm00001d034887|Zm00001d046923|Zm00001d000279|Zm00001d010375|Zm00001d023437|Zm00001d014919|Zm00001d015870|Zm00001d025288|Zm00001d015497|Zm00001d040084|Zm00001d010321	zma:845212|zma:542370|zma:103629493|zma:101202696|zma:542698|zma:100283478|zma:100191272|zma:100281928|zma:845212|zma:100281688|zma:541946|zma:100193709|zma:100217054|zma:100304292|zma:103646899|zma:100286050|zma:103635678|	845212|542370|103629493|101202696|542698|100283478|100191272|100281928|845212|100281688|541946|100193709|100217054|100304292|103646899|100286050|103635678|	http://www.genome.jp/kegg-bin/show_pathway?zma01200/zma:100286050%09red/zma:100281688%09red/zma:542370%09red/zma:100281928%09red/zma:103629493%09red/zma:100193709%09red/zma:100304292%09red/zma:100191272%09red/zma:845212%09red/zma:100283478%09red/zma:101202696%09red/zma:541946%09red/zma:542698%09red/zma:100217054%09red/zma:103646899%09red/zma:103635678%09red
Limonene and pinene degradation	KEGG PATHWAY	zma00903	1	8	0.284537	0.825006	Zm00001d017418	zma:100280692|	100280692|	http://www.genome.jp/kegg-bin/show_pathway?zma00903/zma:100280692%09red
Carotenoid biosynthesis	KEGG PATHWAY	zma00906	3	48	0.28522	0.825006	Zm00001d025545|Zm00001d029822|Zm00001d020717	zma:100285076|zma:103637620|zma:100191697|	100285076|103637620|100191697|	http://www.genome.jp/kegg-bin/show_pathway?zma00906/zma:100285076%09red/zma:100191697%09red/zma:103637620%09red
Lysine biosynthesis	KEGG PATHWAY	zma00300	2	27	0.286226	0.825006	Zm00001d028165|Zm00001d049289	zma:103632470|zma:103653517|	103632470|103653517|	http://www.genome.jp/kegg-bin/show_pathway?zma00300/zma:103653517%09red/zma:103632470%09red
Histidine metabolism	KEGG PATHWAY	zma00340	2	28	0.299884	0.839675	Zm00001d017418|Zm00001d049289	zma:100280692|zma:103653517|	100280692|103653517|	http://www.genome.jp/kegg-bin/show_pathway?zma00340/zma:103653517%09red/zma:100280692%09red
Phenylpropanoid biosynthesis	KEGG PATHWAY	zma00940	11	242	0.319871	0.8557	Zm00001d009373|Zm00001d049541|Zm00001d024037|Zm00001d048087|Zm00001d024314|Zm00001d033649|Zm00001d051166|Zm00001d012159|Zm00001d040705|Zm00001d024752|Zm00001d053839	zma:103635254|zma:100125646|zma:732807|zma:103640406|zma:100281336|zma:100274288|zma:100281532|zma:100280071|zma:100273283|zma:100273104|zma:100192080|	103635254|100125646|732807|103640406|100281336|100274288|100281532|100280071|100273283|100273104|100192080|	http://www.genome.jp/kegg-bin/show_pathway?zma00940/zma:100274288%09red/zma:100192080%09red/zma:100281336%09red/zma:100281532%09red/zma:100125646%09red/zma:100273283%09red/zma:100280071%09red/zma:103640406%09red/zma:100273104%09red/zma:732807%09red/zma:103635254%09red
Terpenoid backbone biosynthesis	KEGG PATHWAY	zma00900	4	75	0.326256	0.8557	Zm00001d008370|Zm00001d006678|Zm00001d031212|Zm00001d008427	zma:100502524|zma:100502523|zma:101202696|zma:103634738|	100502524|100502523|101202696|103634738|	http://www.genome.jp/kegg-bin/show_pathway?zma00900/zma:101202696%09red/zma:100502524%09red/zma:103634738%09red/zma:100502523%09red
Synthesis and degradation of ketone bodies	KEGG PATHWAY	zma00072	1	10	0.335857	0.8557	Zm00001d031212	zma:101202696|	101202696|	http://www.genome.jp/kegg-bin/show_pathway?zma00072/zma:101202696%09red
Zeatin biosynthesis	KEGG PATHWAY	zma00908	2	31	0.340534	0.8557	Zm00001d032046|Zm00001d012335	zma:100280446|zma:103636476|	100280446|103636476|	http://www.genome.jp/kegg-bin/show_pathway?zma00908/zma:103636476%09red/zma:100280446%09red
Pyruvate metabolism	KEGG PATHWAY	zma00620	6	126	0.351581	0.861374	Zm00001d031212|Zm00001d015976|Zm00001d017418|Zm00001d049289|Zm00001d014945|Zm00001d010321	zma:101202696|zma:103626912|zma:100280692|zma:103653517|zma:100193279|zma:103635678|	101202696|103626912|100280692|103653517|100193279|103635678|	http://www.genome.jp/kegg-bin/show_pathway?zma00620/zma:100193279%09red/zma:101202696%09red/zma:103635678%09red/zma:103626912%09red/zma:100280692%09red/zma:103653517%09red
Sesquiterpenoid and triterpenoid biosynthesis	KEGG PATHWAY	zma00909	1	12	0.383502	0.916663	Zm00001d024208	zma:103641097|	103641097|	http://www.genome.jp/kegg-bin/show_pathway?zma00909/zma:103641097%09red
Monoterpenoid biosynthesis	KEGG PATHWAY	zma00902	1	13	0.406029	0.947402	Zm00001d025923	zma:100282122|	100282122|	http://www.genome.jp/kegg-bin/show_pathway?zma00902/zma:100282122%09red
Cysteine and methionine metabolism	KEGG PATHWAY	zma00270	6	137	0.423594	0.963158	Zm00001d026060|Zm00001d039487|Zm00001d052136|Zm00001d013644|Zm00001d014945|Zm00001d024843	zma:100279981|zma:107521951|zma:542137|zma:541714|zma:100193279|zma:542136|	100279981|107521951|542137|541714|100193279|542136|	http://www.genome.jp/kegg-bin/show_pathway?zma00270/zma:100193279%09red/zma:100279981%09red/zma:541714%09red/zma:542137%09red/zma:542136%09red/zma:107521951%09red
Carbon fixation in photosynthetic organisms	KEGG PATHWAY	zma00710	5	113	0.432438	0.963158	Zm00001d000279|GRMZM5G815453|Zm00001d040084|Zm00001d021050|Zm00001d010321	zma:845212|zma:845212|zma:100286050|zma:100283478|zma:103635678|	845212|845212|100286050|100283478|103635678|	http://www.genome.jp/kegg-bin/show_pathway?zma00710/zma:103635678%09red/zma:100283478%09red/zma:845212%09red/zma:100286050%09red
Valine, leucine and isoleucine degradation	KEGG PATHWAY	zma00280	3	67	0.473313	0.996327	Zm00001d017418|Zm00001d031212|Zm00001d049289	zma:100280692|zma:101202696|zma:103653517|	100280692|101202696|103653517|	http://www.genome.jp/kegg-bin/show_pathway?zma00280/zma:101202696%09red/zma:103653517%09red/zma:100280692%09red
Propanoate metabolism	KEGG PATHWAY	zma00640	2	42	0.481046	0.996327	Zm00001d031212|Zm00001d014945	zma:101202696|zma:100193279|	101202696|100193279|	http://www.genome.jp/kegg-bin/show_pathway?zma00640/zma:101202696%09red/zma:100193279%09red
Arachidonic acid metabolism	KEGG PATHWAY	zma00590	1	17	0.488215	0.996327	Zm00001d026154	zma:100280060|	100280060|	http://www.genome.jp/kegg-bin/show_pathway?zma00590/zma:100280060%09red
Fructose and mannose metabolism	KEGG PATHWAY	zma00051	4	96	0.498548	0.996327	Zm00001d040084|Zm00001d036206|Zm00001d010375|Zm00001d028572	zma:100286050|zma:103629493|zma:100281688|zma:100274383|	100286050|103629493|100281688|100274383|	http://www.genome.jp/kegg-bin/show_pathway?zma00051/zma:100286050%09red/zma:100274383%09red/zma:103629493%09red/zma:100281688%09red
RNA degradation	KEGG PATHWAY	zma03018	7	176	0.50438	0.996327	Zm00001d036206|Zm00001d035937|Zm00001d045544|Zm00001d024713|Zm00001d010375|Novel00122|Zm00001d019898	zma:103629493|zma:103629384|zma:542185|zma:100501174|zma:100281688|zma:103651400|zma:100282980|	103629493|103629384|542185|100501174|100281688|103651400|100282980|	http://www.genome.jp/kegg-bin/show_pathway?zma03018/zma:100281688%09red/zma:542185%09red/zma:100282980%09red/zma:103629384%09red/zma:103651400%09red/zma:100501174%09red/zma:103629493%09red
Steroid biosynthesis	KEGG PATHWAY	zma00100	2	47	0.538631	0.996327	Zm00001d044120|Zm00001d013035	zma:100273258|zma:100282501|	100273258|100282501|	http://www.genome.jp/kegg-bin/show_pathway?zma00100/zma:100273258%09red/zma:100282501%09red
Tropane, piperidine and pyridine alkaloid biosynthesis	KEGG PATHWAY	zma00960	1	21	0.559046	0.996327	Zm00001d007687	zma:100273624|	100273624|	http://www.genome.jp/kegg-bin/show_pathway?zma00960/zma:100273624%09red
Amino sugar and nucleotide sugar metabolism	KEGG PATHWAY	zma00520	7	186	0.561029	0.996327	Zm00001d015008|Zm00001d009936|Zm00001d014674|Zm00001d014842|Zm00001d014840|Zm00001d028572|Zm00001d042514	zma:100191463|zma:100284192|zma:100382378|zma:542243|zma:100283208|zma:100274383|zma:100285419|	100191463|100284192|100382378|542243|100283208|100274383|100285419|	http://www.genome.jp/kegg-bin/show_pathway?zma00520/zma:542243%09red/zma:100191463%09red/zma:100274383%09red/zma:100285419%09red/zma:100283208%09red/zma:100284192%09red/zma:100382378%09red
Base excision repair	KEGG PATHWAY	zma03410	2	50	0.571004	0.996327	Zm00001d016801|Novel01044	zma:100273912|zma:103627197|	100273912|103627197|	http://www.genome.jp/kegg-bin/show_pathway?zma03410/zma:103627197%09red/zma:100273912%09red
Arginine and proline metabolism	KEGG PATHWAY	zma00330	3	78	0.571787	0.996327	Zm00001d017418|Zm00001d051194|Zm00001d049289	zma:100280692|zma:100193626|zma:103653517|	100280692|100193626|103653517|	http://www.genome.jp/kegg-bin/show_pathway?zma00330/zma:103653517%09red/zma:100280692%09red/zma:100193626%09red
SNARE interactions in vesicular transport	KEGG PATHWAY	zma04130	2	51	0.581423	0.996327	Zm00001d013114|Zm00001d021664	zma:100284409|zma:103633246|	100284409|103633246|	http://www.genome.jp/kegg-bin/show_pathway?zma04130/zma:100284409%09red/zma:103633246%09red
Biosynthesis of unsaturated fatty acids	KEGG PATHWAY	zma01040	2	52	0.591654	0.996327	Zm00001d008623|Zm00001d025170	zma:100383128|zma:100283843|	100383128|100283843|	http://www.genome.jp/kegg-bin/show_pathway?zma01040/zma:100383128%09red/zma:100283843%09red
Glycolysis / Gluconeogenesis	KEGG PATHWAY	zma00010	7	193	0.598892	0.996327	Zm00001d049059|Zm00001d049289|Zm00001d040084|Zm00001d017418|Zm00001d036206|Zm00001d010375|Zm00001d014945	zma:542364|zma:103653517|zma:100286050|zma:100280692|zma:103629493|zma:100281688|zma:100193279|	542364|103653517|100286050|100280692|103629493|100281688|100193279|	http://www.genome.jp/kegg-bin/show_pathway?zma00010/zma:100281688%09red/zma:100193279%09red/zma:542364%09red/zma:100286050%09red/zma:103629493%09red/zma:100280692%09red/zma:103653517%09red
Aminoacyl-tRNA biosynthesis	KEGG PATHWAY	zma00970	4	111	0.609302	0.996327	Zm00001d015037|Zm00001d026305|Zm00001d031241|Zm00001d021962	zma:100383787|zma:100383789|zma:103641258|zma:103626016|	100383787|100383789|103641258|103626016|	http://www.genome.jp/kegg-bin/show_pathway?zma00970/zma:100383787%09red/zma:100383789%09red/zma:103641258%09red/zma:103626016%09red
Glycine, serine and threonine metabolism	KEGG PATHWAY	zma00260	4	111	0.609302	0.996327	Zm00001d014919|Zm00001d023437|Zm00001d046923|Zm00001d049289	zma:100193709|zma:541946|zma:100281928|zma:103653517|	100193709|541946|100281928|103653517|	http://www.genome.jp/kegg-bin/show_pathway?zma00260/zma:103653517%09red/zma:541946%09red/zma:100281928%09red/zma:100193709%09red
alpha-Linolenic acid metabolism	KEGG PATHWAY	zma00592	2	55	0.621223	0.996327	Zm00001d031449|Zm00001d049059	zma:103642039|zma:542364|	103642039|542364|	http://www.genome.jp/kegg-bin/show_pathway?zma00592/zma:542364%09red/zma:103642039%09red
2-Oxocarboxylic acid metabolism	KEGG PATHWAY	zma01210	3	86	0.635801	0.996327	Zm00001d015497|Zm00001d025690|Zm00001d021981	zma:103646899|zma:542698|zma:103634365|	103646899|542698|103634365|	http://www.genome.jp/kegg-bin/show_pathway?zma01210/zma:103634365%09red/zma:542698%09red/zma:103646899%09red
Selenocompound metabolism	KEGG PATHWAY	zma00450	1	27	0.64737	0.996327	Zm00001d013644	zma:541714|	541714|	http://www.genome.jp/kegg-bin/show_pathway?zma00450/zma:541714%09red
Glycosylphosphatidylinositol(GPI)-anchor biosynthesis	KEGG PATHWAY	zma00563	1	28	0.660268	0.996327	Novel01309	zma:100192477|	100192477|	http://www.genome.jp/kegg-bin/show_pathway?zma00563/zma:100192477%09red
Biotin metabolism	KEGG PATHWAY	zma00780	1	28	0.660268	0.996327	Zm00001d015344	zma:103626660|	103626660|	http://www.genome.jp/kegg-bin/show_pathway?zma00780/zma:103626660%09red
Peroxisome	KEGG PATHWAY	zma04146	4	122	0.680254	0.996327	Zm00001d051374|Zm00001d054044|Zm00001d052410|Zm00001d019850	zma:100303903|zma:542370|zma:100384529|zma:100501369|	100303903|542370|100384529|100501369|	http://www.genome.jp/kegg-bin/show_pathway?zma04146/zma:100303903%09red/zma:542370%09red/zma:100384529%09red/zma:100501369%09red
Glycerophospholipid metabolism	KEGG PATHWAY	zma00564	4	130	0.725888	0.996327	Zm00001d012924|Zm00001d015256|Zm00001d043652|Novel00820	zma:100384160|zma:103630917|zma:100286064|zma:103626841|	100384160|103630917|100286064|103626841|	http://www.genome.jp/kegg-bin/show_pathway?zma00564/zma:100286064%09red/zma:100384160%09red/zma:103630917%09red/zma:103626841%09red
RNA transport	KEGG PATHWAY	zma03013	8	249	0.725906	0.996327	Zm00001d011328|Zm00001d008702|Zm00001d022198|Zm00001d014873|Zm00001d006596|Zm00001d019898|Zm00001d015917|Zm00001d004109	zma:103637360|zma:103636786|zma:100502129|zma:100277107|zma:100502553|zma:100282980|zma:107548100|zma:103648761|	103637360|103636786|100502129|100277107|100502553|100282980|107548100|103648761|	http://www.genome.jp/kegg-bin/show_pathway?zma03013/zma:103637360%09red/zma:100282980%09red/zma:103648761%09red/zma:100277107%09red/zma:100502553%09red/zma:100502129%09red/zma:107548100%09red/zma:103636786%09red
ABC transporters	KEGG PATHWAY	zma02010	1	34	0.728346	0.996327	Zm00001d016794	zma:103627277|	103627277|	http://www.genome.jp/kegg-bin/show_pathway?zma02010/zma:103627277%09red
Biosynthesis of amino acids	KEGG PATHWAY	zma01230	12	371	0.746439	0.996327	Zm00001d028165|Zm00001d036206|Zm00001d025690|Zm00001d049289|Zm00001d046923|Zm00001d040084|Zm00001d021050|Zm00001d021981|Zm00001d025333|Zm00001d015497|Zm00001d010375|Zm00001d013644	zma:103632470|zma:103629493|zma:542698|zma:103653517|zma:100281928|zma:100286050|zma:100283478|zma:103634365|zma:100279620|zma:103646899|zma:100281688|zma:541714|	103632470|103629493|542698|103653517|100281928|100286050|100283478|103634365|100279620|103646899|100281688|541714|	http://www.genome.jp/kegg-bin/show_pathway?zma01230/zma:100281688%09red/zma:100281928%09red/zma:103632470%09red/zma:103634365%09red/zma:100279620%09red/zma:100283478%09red/zma:100286050%09red/zma:541714%09red/zma:103629493%09red/zma:103646899%09red/zma:542698%09red/zma:103653517%09red
Fatty acid metabolism	KEGG PATHWAY	zma01212	3	108	0.775982	0.996327	Zm00001d008623|Zm00001d031212|Zm00001d025170	zma:100383128|zma:101202696|zma:100283843|	100383128|101202696|100283843|	http://www.genome.jp/kegg-bin/show_pathway?zma01212/zma:101202696%09red/zma:100383128%09red/zma:100283843%09red
Tyrosine metabolism	KEGG PATHWAY	zma00350	1	46	0.826356	0.996327	Zm00001d049059	zma:542364|	542364|	http://www.genome.jp/kegg-bin/show_pathway?zma00350/zma:542364%09red
Glycerolipid metabolism	KEGG PATHWAY	zma00561	2	85	0.831822	0.996327	Zm00001d017418|Zm00001d049289	zma:100280692|zma:103653517|	100280692|103653517|	http://www.genome.jp/kegg-bin/show_pathway?zma00561/zma:103653517%09red/zma:100280692%09red
Sulfur metabolism	KEGG PATHWAY	zma00920	1	48	0.838841	0.996327	Zm00001d042600	zma:100277932|	100277932|	http://www.genome.jp/kegg-bin/show_pathway?zma00920/zma:100277932%09red
Phenylalanine metabolism	KEGG PATHWAY	zma00360	1	48	0.838841	0.996327	Zm00001d051166	zma:100281532|	100281532|	http://www.genome.jp/kegg-bin/show_pathway?zma00360/zma:100281532%09red
Inositol phosphate metabolism	KEGG PATHWAY	zma00562	2	87	0.841174	0.996327	Zm00001d012924|Zm00001d014292	zma:100384160|zma:100384851|	100384160|100384851|	http://www.genome.jp/kegg-bin/show_pathway?zma00562/zma:100384851%09red/zma:100384160%09red
Protein processing in endoplasmic reticulum	KEGG PATHWAY	zma04141	9	316	0.84368	0.996327	Zm00001d020058|Zm00001d020390|Zm00001d026467|Zm00001d052809|Zm00001d016060|Novel01879|Zm00001d016786|Zm00001d053965|Zm00001d051609	zma:103651028|zma:103630077|zma:103641707|zma:100383793|zma:100384252|zma:103651507|zma:100282296|zma:103654949|zma:100280907|	103651028|103630077|103641707|100383793|100384252|103651507|100282296|103654949|100280907|	http://www.genome.jp/kegg-bin/show_pathway?zma04141/zma:103641707%09red/zma:103630077%09red/zma:103654949%09red/zma:103651507%09red/zma:100384252%09red/zma:100280907%09red/zma:100282296%09red/zma:103651028%09red/zma:100383793%09red
Arginine biosynthesis	KEGG PATHWAY	zma00220	1	49	0.844744	0.996327	Zm00001d021981	zma:103634365|	103634365|	http://www.genome.jp/kegg-bin/show_pathway?zma00220/zma:103634365%09red
Nitrogen metabolism	KEGG PATHWAY	zma00910	1	50	0.850431	0.996327	Zm00001d015870	zma:100217054|	100217054|	http://www.genome.jp/kegg-bin/show_pathway?zma00910/zma:100217054%09red
Ribosome biogenesis in eukaryotes	KEGG PATHWAY	zma03008	3	128	0.861859	0.996327	Zm00001d002483|Zm00001d052952|Zm00001d011328	zma:103642006|zma:103643026|zma:103637360|	103642006|103643026|103637360|	http://www.genome.jp/kegg-bin/show_pathway?zma03008/zma:103637360%09red/zma:103643026%09red/zma:103642006%09red
Oxidative phosphorylation	KEGG PATHWAY	zma00190	4	170	0.883599	0.996327	Zm00001d037492|Zm00001d014772|Zm00001d043619|Zm00001d016619	zma:101027208|zma:100282004|zma:100192583|zma:100192468|	101027208|100282004|100192583|100192468|	http://www.genome.jp/kegg-bin/show_pathway?zma00190/zma:100192468%09red/zma:100192583%09red/zma:101027208%09red/zma:100282004%09red
Endocytosis	KEGG PATHWAY	zma04144	7	270	0.883625	0.996327	Zm00001d015256|Zm00001d014278|Zm00001d020058|Zm00001d012897|Novel00820|Zm00001d007340|Zm00001d021087	zma:103630917|zma:100283230|zma:103651028|zma:103627944|zma:103626841|zma:100273517|zma:103632959|	103630917|100283230|103651028|103627944|103626841|100273517|103632959|	http://www.genome.jp/kegg-bin/show_pathway?zma04144/zma:103632959%09red/zma:103630917%09red/zma:100273517%09red/zma:103626841%09red/zma:103651028%09red/zma:103627944%09red/zma:100283230%09red
Citrate cycle (TCA cycle)	KEGG PATHWAY	zma00020	2	98	0.88466	0.996327	Zm00001d015497|Zm00001d025690	zma:103646899|zma:542698|	103646899|542698|	http://www.genome.jp/kegg-bin/show_pathway?zma00020/zma:542698%09red/zma:103646899%09red
Basal transcription factors	KEGG PATHWAY	zma03022	1	61	0.900803	0.996327	Zm00001d051713	zma:103650604|	103650604|	http://www.genome.jp/kegg-bin/show_pathway?zma03022/zma:103650604%09red
Plant hormone signal transduction	KEGG PATHWAY	zma04075	9	355	0.919255	0.996327	Zm00001d020711|Zm00001d034920|Zm00001d025947|Zm00001d046751|Zm00001d012128|Zm00001d042463|Zm00001d052148|Zm00001d016277|Zm00001d029558	zma:100193967|zma:100384381|zma:100280805|zma:100279873|zma:103636390|zma:100285939|zma:100280867|zma:100283352|zma:103636577|	100193967|100384381|100280805|100279873|103636390|100285939|100280867|100283352|103636577|	http://www.genome.jp/kegg-bin/show_pathway?zma04075/zma:100280805%09red/zma:100280867%09red/zma:103636390%09red/zma:100193967%09red/zma:100279873%09red/zma:100285939%09red/zma:100384381%09red/zma:103636577%09red/zma:100283352%09red
Fatty acid biosynthesis	KEGG PATHWAY	zma00061	1	68	0.923627	0.996327	Zm00001d025170	zma:100283843|	100283843|	http://www.genome.jp/kegg-bin/show_pathway?zma00061/zma:100283843%09red
Phenylalanine, tyrosine and tryptophan biosynthesis	KEGG PATHWAY	zma00400	1	73	0.936644	0.996327	Zm00001d025333	zma:100279620|	100279620|	http://www.genome.jp/kegg-bin/show_pathway?zma00400/zma:100279620%09red
mRNA surveillance pathway	KEGG PATHWAY	zma03015	3	179	0.964523	0.996327	Zm00001d022198|Zm00001d037868|Zm00001d019898	zma:100502129|zma:100281195|zma:100282980|	100502129|100281195|100282980|	http://www.genome.jp/kegg-bin/show_pathway?zma03015/zma:100281195%09red/zma:100502129%09red/zma:100282980%09red
Spliceosome	KEGG PATHWAY	zma03040	5	269	0.973835	0.996327	Zm00001d012301|Zm00001d018882|Zm00001d020058|Zm00001d022198|Zm00001d013489	zma:100282560|zma:100282140|zma:103651028|zma:100502129|zma:103625968|	100282560|100282140|103651028|100502129|103625968|	http://www.genome.jp/kegg-bin/show_pathway?zma03040/zma:100502129%09red/zma:100282140%09red/zma:103651028%09red/zma:103625968%09red/zma:100282560%09red
Proteasome	KEGG PATHWAY	zma03050	1	99	0.976045	0.996327	Novel01622	zma:103641164|	103641164|	http://www.genome.jp/kegg-bin/show_pathway?zma03050/zma:103641164%09red
Phosphatidylinositol signaling system	KEGG PATHWAY	zma04070	1	99	0.976045	0.996327	Zm00001d043144	zma:100502442|	100502442|	http://www.genome.jp/kegg-bin/show_pathway?zma04070/zma:100502442%09red
Photosynthesis	KEGG PATHWAY	zma00195	1	101	0.977774	0.996327	Zm00001d038291	zma:541612|	541612|	http://www.genome.jp/kegg-bin/show_pathway?zma00195/zma:541612%09red
Ribosome	KEGG PATHWAY	zma03010	11	504	0.982806	0.996327	Zm00001d005030|Novel00549|Zm00001d030114|Zm00001d046129|Zm00001d018096|Zm00001d027919|Zm00001d034724|Novel00906|Zm00001d011596|Zm00001d015204|Zm00001d047581	zma:103654848|zma:100284418|zma:103637734|zma:103637734|zma:100284301|zma:103639501|zma:100284921|zma:103640437|zma:100286220|zma:100193892|zma:100283777|	103654848|100284418|103637734|103637734|100284301|103639501|100284921|103640437|100286220|100193892|100283777|	http://www.genome.jp/kegg-bin/show_pathway?zma03010/zma:100283777%09red/zma:100193892%09red/zma:100284921%09red/zma:103639501%09red/zma:103640437%09red/zma:100284418%09red/zma:103637734%09red/zma:100284301%09red/zma:100286220%09red/zma:103654848%09red
DNA replication	KEGG PATHWAY	zma03030	1	122	0.989882	0.996327	Novel01044	zma:103627197|	103627197|	http://www.genome.jp/kegg-bin/show_pathway?zma03030/zma:103627197%09red
Pyrimidine metabolism	KEGG PATHWAY	zma00240	2	176	0.989969	0.996327	Zm00001d035916|Novel01044	zma:100281735|zma:103627197|	100281735|103627197|	http://www.genome.jp/kegg-bin/show_pathway?zma00240/zma:103627197%09red/zma:100281735%09red
Ubiquitin mediated proteolysis	KEGG PATHWAY	zma04120	2	178	0.990604	0.996327	Zm00001d043613|Zm00001d015028	zma:100280509|zma:103653924|	100280509|103653924|	http://www.genome.jp/kegg-bin/show_pathway?zma04120/zma:100280509%09red/zma:103653924%09red
Nucleotide excision repair	KEGG PATHWAY	zma03420	1	125	0.990958	0.996327	Novel01044	zma:103627197|	103627197|	http://www.genome.jp/kegg-bin/show_pathway?zma03420/zma:103627197%09red
Purine metabolism	KEGG PATHWAY	zma00230	3	227	0.991196	0.996327	Zm00001d026685|Zm00001d041814|Novel01044	zma:100383569|zma:103650626|zma:103627197|	100383569|103650626|103627197|	http://www.genome.jp/kegg-bin/show_pathway?zma00230/zma:103627197%09red/zma:100383569%09red/zma:103650626%09red
Phagosome	KEGG PATHWAY	zma04145	1	149	0.996327	0.996327	Novel01879	zma:103651507|	103651507|	http://www.genome.jp/kegg-bin/show_pathway?zma04145/zma:103651507%09red
--------------------
#Term	Database	ID	Input number	Background number	P-Value	Corrected P-Value	Input	KEGG_ID/KO	Entrez_ID	Hyperlink
--------------------
#Term	Database	ID	Input number	Background number	P-Value	Corrected P-Value	Input	KEGG_ID/KO	Entrez_ID	Hyperlink
--------------------
