# Supplementary material for: Comparative transcriptome analysis of differentially expressed genes related to the physiological changes of yellow-green leaf mutant of maize
Source: PeerJ. 2021 Feb 16;9:e10567. doi: 10.7717/peerj.10567 (PMC7894110; doi:10.7717/peerj.10567)
Supplement: Supplemental Information 5 [file peerj-09-10567-s005.xlsx]

## Sheet: mercator.results-yellow
BINCODE	NAME	IDENTIFIER	DESCRIPTION	TYPE
'1.1.1.2'	'PS.lightreaction.photosystem II.PSII polypeptide subunits'	'zm00001d041824'	'(at1g77090 : 315.0) Mog1/PsbP/DUF1795-like photosystem II reaction center PsbP family protein; FUNCTIONS IN: calcium ion binding; INVOLVED IN: photosynthesis; LOCATED IN: thylakoid, thylakoid lumen, chloroplast thylakoid lumen, chloroplast stroma, chloroplast; EXPRESSED IN: 21 plant structures; EXPRESSED DURING: 13 growth stages; CONTAINS InterPro DOMAIN/s: Photosystem II oxygen evolving complex…	T
'1.1.40'	'PS.lightreaction.cyclic electron flow-chlororespiration'	'zm00001d034904'	'(at4g22890 : 323.0) Encodes PGRL1A, a transmembrane protein present in thylakoids. PGRL1A has a highly homologous isoform PGRL1B encoded by At4g11960. Plants lacking PGRL1 show perturbation of cyclic electron flow, similar to PGR5-deficient plants. PGRL1 and PGR5 interact physically and associate with PSI (photosystem I).; PGR5-LIKE A; FUNCTIONS IN: molecular_function unknown; INVOLVED IN: photo…	T
'1.2.1'	'PS.photorespiration.phosphoglycolate phosphatase'	'zm00001d034887'	'(at5g47760 : 401.0) serine/threonine protein kinase; 2-phosphoglycolate phosphatase 2 (PGLP2); FUNCTIONS IN: protein serine/threonine kinase activity, phosphoglycolate phosphatase activity; INVOLVED IN: metabolic process; LOCATED IN: chloroplast; EXPRESSED IN: 26 plant structures; EXPRESSED DURING: 13 growth stages; CONTAINS InterPro DOMAIN/s: HAD-superfamily hydrolase, subfamily IIA (InterPro:I…	T
'1.2.4.1'	'PS.photorespiration.glycine cleavage.P subunit'	'zm00001d023437'	'(o49954|gcsp_soltu : 1595.0) Glycine dehydrogenase [decarboxylating], mitochondrial precursor (EC 1.4.4.2) (Glycine decarboxylase) (Glycine cleavage system P-protein) - Solanum tuberosum (Potato) & (at2g26080 : 1593.0) glycine decarboxylase P-protein 2 (GLDP2); FUNCTIONS IN: glycine dehydrogenase (decarboxylating) activity, ATP binding; INVOLVED IN: oxidation reduction, glycine decarboxylation v…	T
'1.2.6'	'PS.photorespiration.hydroxypyruvate reductase'	'zm00001d014919'	'(p13443|dhgy_cucsa : 533.0) Glycerate dehydrogenase (EC 1.1.1.29) (NADH-dependent hydroxypyruvate reductase) (HPR) (GDH) - Cucumis sativus (Cucumber) & (at1g68010 : 521.0) Encodes hydroxypyruvate reductase.; hydroxypyruvate reductase (HPR); CONTAINS InterPro DOMAIN/s: D-isomer specific 2-hydroxyacid dehydrogenase, catalytic domain (InterPro:IPR006139), D-isomer specific 2-hydroxyacid dehydrogena…	T
'1.3.1'	'PS.calvin cycle.rubisco large subunit'	'zm00001d000279'	'(p00874|rbl_maize : 944.0) Ribulose bisphosphate carboxylase large chain precursor (EC 4.1.1.39) (RuBisCO large subunit) - Zea mays (Maize) & (atcg00490 : 877.0) large subunit of RUBISCO. Protein is tyrosine-phosphorylated and its phosphorylation state is modulated in response to ABA in Arabidopsis thaliana seeds.; RBCL; FUNCTIONS IN: ribulose-bisphosphate carboxylase activity; INVOLVED IN: resp…	T
'1.3.13'	'PS.calvin cycle.rubisco interacting'	'zm00001d051252'	'(p08823|ruba_wheat : 203.0) RuBisCO large subunit-binding protein subunit alpha, chloroplast precursor (60 kDa chaperonin subunit alpha) (CPN-60 alpha) (Fragment) - Triticum aestivum (Wheat) & (at2g28000 : 182.0) Encodes chaperonin-60 alpha, a molecular chaperone involved in Rubisco folding. Mutants display aberrant chloroplast and embryo development.; chaperonin-60alpha (CPN60A); FUNCTIONS IN: …	T
'1.3.13'	'PS.calvin cycle.rubisco interacting'	'zm00001d045544'	'(at3g13470 : 935.0) TCP-1/cpn60 chaperonin family protein; FUNCTIONS IN: ATP binding; INVOLVED IN: protein folding, protein refolding, cellular protein metabolic process; LOCATED IN: in 7 components; EXPRESSED IN: 26 plant structures; EXPRESSED DURING: 14 growth stages; CONTAINS InterPro DOMAIN/s: Chaperonin Cpn60/TCP-1 (InterPro:IPR002423), Chaperonin Cpn60, conserved site (InterPro:IPR018370),…	T
'1.3.13'	'PS.calvin cycle.rubisco interacting'	'zm00001d035937'	'(at1g55490 : 935.0) encodes the beta subunit of the chloroplast chaperonin 60, a homologue of bacterial GroEL. Mutants in this gene develops lesions on its leaves, expresses systemic acquired resistance (SAR) and develops accelerated cell death to heat shock stress. The protein has molecular chaperone activity for suppressing protein aggregation in vitro.; chaperonin 60 beta (CPN60B); FUNCTIONS …	T
'1.3.13'	'PS.calvin cycle.rubisco interacting'	'zm00001d031503'	'(p21239|rub1_brana : 163.0) RuBisCO large subunit-binding protein subunit alpha, chloroplast precursor (60 kDa chaperonin subunit alpha) (CPN-60 alpha) (Fragment) - Brassica napus (Rape) & (at2g28000 : 159.0) Encodes chaperonin-60 alpha, a molecular chaperone involved in Rubisco folding. Mutants display aberrant chloroplast and embryo development.; chaperonin-60alpha (CPN60A); FUNCTIONS IN: ATP …	T
'1.3.13'	'PS.calvin cycle.rubisco interacting'	'zm00001d020437'	'(at1g14030 : 534.0) Rubisco methyltransferase family protein; FUNCTIONS IN: [ribulose-bisphosphate carboxylase]-lysine N-methyltransferase activity; LOCATED IN: chloroplast, chloroplast stroma; EXPRESSED IN: 20 plant structures; EXPRESSED DURING: 13 growth stages; CONTAINS InterPro DOMAIN/s: Rubisco methyltransferase (InterPro:IPR011192), SET domain (InterPro:IPR001214), Rubisco LSMT substrate-b…	T
'1.3.13'	'PS.calvin cycle.rubisco interacting'	'zm00001d000399'	'(p08823|ruba_wheat : 850.0) RuBisCO large subunit-binding protein subunit alpha, chloroplast precursor (60 kDa chaperonin subunit alpha) (CPN-60 alpha) (Fragment) - Triticum aestivum (Wheat) & (at2g28000 : 793.0) Encodes chaperonin-60 alpha, a molecular chaperone involved in Rubisco folding. Mutants display aberrant chloroplast and embryo development.; chaperonin-60alpha (CPN60A); FUNCTIONS IN: …	T
'1.3.6'	'PS.calvin cycle.aldolase'	'zm00001d040084'	'(at2g01140 : 630.0) Aldolase superfamily protein; FUNCTIONS IN: fructose-bisphosphate aldolase activity; INVOLVED IN: response to oxidative stress, response to cadmium ion, pentose-phosphate shunt; LOCATED IN: mitochondrion, chloroplast, plastoglobule; EXPRESSED IN: 25 plant structures; EXPRESSED DURING: 15 growth stages; CONTAINS InterPro DOMAIN/s: Aldolase-type TIM barrel (InterPro:IPR013785),…	T
'4.1.1'	'glycolysis.cytosolic branch.UGPase'	'zm00001d015008'	'(at5g17310 : 777.0) UDP-glucose pyrophosphorylase 2 (UGP2); FUNCTIONS IN: UTP:glucose-1-phosphate uridylyltransferase activity, nucleotidyltransferase activity; INVOLVED IN: response to cadmium ion, callose deposition in cell wall, response to salt stress, metabolic process, pollen development; LOCATED IN: plasma membrane; EXPRESSED IN: 27 plant structures; EXPRESSED DURING: 17 growth stages; CO…	T
'4.1.12'	'glycolysis.cytosolic branch.phosphoglycerate mutase'	'zm00001d024939'	'(at5g64460 : 287.0) Phosphoglycerate mutase family protein; FUNCTIONS IN: molecular_function unknown; INVOLVED IN: biological_process unknown; LOCATED IN: cellular_component unknown; EXPRESSED IN: 22 plant structures; EXPRESSED DURING: 13 growth stages; CONTAINS InterPro DOMAIN/s: Histidine phosphatase superfamily, clade-1 (InterPro:IPR013078); BEST Arabidopsis thaliana protein match is: Phospho…	T
'4.1.4'	'glycolysis.cytosolic branch.phosphofructokinase (PFK)'	'zm00001d036206'	'(at4g26270 : 756.0) phosphofructokinase 3 (PFK3); CONTAINS InterPro DOMAIN/s: Pyrophosphate-dependent phosphofructokinase TP0108 (InterPro:IPR012004), Phosphofructokinase (InterPro:IPR000023); BEST Arabidopsis thaliana protein match is: phosphofructokinase 7 (TAIR:AT5G56630.1); Has 30201 Blast hits to 17322 proteins in 780 species: Archae - 12; Bacteria - 1396; Metazoa - 17338; Fungi - 3422; Pla…	T
'4.1.4'	'glycolysis.cytosolic branch.phosphofructokinase (PFK)'	'zm00001d010375'	'(at4g26270 : 707.0) phosphofructokinase 3 (PFK3); CONTAINS InterPro DOMAIN/s: Pyrophosphate-dependent phosphofructokinase TP0108 (InterPro:IPR012004), Phosphofructokinase (InterPro:IPR000023); BEST Arabidopsis thaliana protein match is: phosphofructokinase 7 (TAIR:AT5G56630.1); Has 30201 Blast hits to 17322 proteins in 780 species: Archae - 12; Bacteria - 1396; Metazoa - 17338; Fungi - 3422; Pla…	T
'4.2.4'	'glycolysis.plastid branch.phosphofructokinase (PFK)'	'zm00001d036206'	'(at4g26270 : 756.0) phosphofructokinase 3 (PFK3); CONTAINS InterPro DOMAIN/s: Pyrophosphate-dependent phosphofructokinase TP0108 (InterPro:IPR012004), Phosphofructokinase (InterPro:IPR000023); BEST Arabidopsis thaliana protein match is: phosphofructokinase 7 (TAIR:AT5G56630.1); Has 30201 Blast hits to 17322 proteins in 780 species: Archae - 12; Bacteria - 1396; Metazoa - 17338; Fungi - 3422; Pla…	T
'4.2.4'	'glycolysis.plastid branch.phosphofructokinase (PFK)'	'zm00001d010375'	'(at4g26270 : 707.0) phosphofructokinase 3 (PFK3); CONTAINS InterPro DOMAIN/s: Pyrophosphate-dependent phosphofructokinase TP0108 (InterPro:IPR012004), Phosphofructokinase (InterPro:IPR000023); BEST Arabidopsis thaliana protein match is: phosphofructokinase 7 (TAIR:AT5G56630.1); Has 30201 Blast hits to 17322 proteins in 780 species: Archae - 12; Bacteria - 1396; Metazoa - 17338; Fungi - 3422; Pla…	T
'4.3.4'	'glycolysis.unclear/dually targeted.phosphofructokinase (PFK)'	'zm00001d036206'	'(at4g26270 : 756.0) phosphofructokinase 3 (PFK3); CONTAINS InterPro DOMAIN/s: Pyrophosphate-dependent phosphofructokinase TP0108 (InterPro:IPR012004), Phosphofructokinase (InterPro:IPR000023); BEST Arabidopsis thaliana protein match is: phosphofructokinase 7 (TAIR:AT5G56630.1); Has 30201 Blast hits to 17322 proteins in 780 species: Archae - 12; Bacteria - 1396; Metazoa - 17338; Fungi - 3422; Pla…	T
'4.3.4'	'glycolysis.unclear/dually targeted.phosphofructokinase (PFK)'	'zm00001d010375'	'(at4g26270 : 707.0) phosphofructokinase 3 (PFK3); CONTAINS InterPro DOMAIN/s: Pyrophosphate-dependent phosphofructokinase TP0108 (InterPro:IPR012004), Phosphofructokinase (InterPro:IPR000023); BEST Arabidopsis thaliana protein match is: phosphofructokinase 7 (TAIR:AT5G56630.1); Has 30201 Blast hits to 17322 proteins in 780 species: Archae - 12; Bacteria - 1396; Metazoa - 17338; Fungi - 3422; Pla…	T
'5.1'	'fermentation.LDH'	'zm00001d014945'	'(p29038|ldh_maize : 528.0) L-lactate dehydrogenase (EC 1.1.1.27) (LDH) - Zea mays (Maize) & (at4g17260 : 422.0) Lactate/malate dehydrogenase family protein; FUNCTIONS IN: in 6 functions; INVOLVED IN: response to salt stress, response to abscisic acid stimulus; LOCATED IN: plasma membrane; EXPRESSED IN: 24 plant structures; EXPRESSED DURING: 13 growth stages; CONTAINS InterPro DOMAIN/s: L-lactate…	T
'5.10'	'fermentation.aldehyde dehydrogenase'	'zm00001d049289'	'(q9zpb7|al7a1_maldo : 108.0) Aldehyde dehydrogenase family 7 member A1 (EC 1.2.1.3) (Antiquitin-1) (Matured fruit 60 kDa protein) (MF-60) - Malus domestica (Apple) (Malus sylvestris) & (at1g54100 : 100.0) Aldehyde dehydrogenase; aldehyde dehydrogenase 7B4 (ALDH7B4); FUNCTIONS IN: 3-chloroallyl aldehyde dehydrogenase activity, oxidoreductase activity; INVOLVED IN: response to desiccation, respons…	T
'5.10'	'fermentation.aldehyde dehydrogenase'	'zm00001d017418'	'(at4g36250 : 424.0) Encodes a putative aldehyde dehydrogenase. The gene is not responsive to osmotic stress and is expressed constitutively at a low level in plantlets and root cultures.; aldehyde dehydrogenase 3F1 (ALDH3F1); FUNCTIONS IN: 3-chloroallyl aldehyde dehydrogenase activity, aldehyde dehydrogenase (NAD) activity; INVOLVED IN: cellular aldehyde metabolic process, oxidation reduction, m…	T
'5.3'	'fermentation.ADH'	'zm00001d049059'	'(p04707|adh2_maize : 751.0) Alcohol dehydrogenase 2 (EC 1.1.1.1) - Zea mays (Maize) & (at1g77120 : 627.0) Catalyzes the reduction of acetaldehyde using NADH as reductant. Requires zinc for activity. Dimer. Anaerobic response polypeptide (ANP). Fermentation. The protein undergoes thiolation following treatment with the oxidant tert-butylhydroperoxide.; alcohol dehydrogenase 1 (ADH1); FUNCTIONS IN…	T
'6.5'	'gluconeogenesis / glyoxylate cycle.pyruvate dikinase'	'zm00001d010321'	'(p11155|ppdk_maize : 1060.0) Pyruvate, phosphate dikinase, chloroplast precursor (EC 2.7.9.1) (Pyruvate, orthophosphate dikinase) - Zea mays (Maize) & (at4g15530 : 937.0) Encodes a dual-targeted protein believed to act as a pyruvate, orthophosphate dikinase. These enzymes are normally associated with C4 photosynthesis which does not occur in Arabidopsis. However, PPDK may play a role in remobili…	T
'7.2.3'	'OPP.non-reductive PP.ribulose-phosphate 3-epimerase'	'zm00001d021050'	'(q9se42|rpe1_orysa : 178.0) Ribulose-phosphate 3-epimerase, cytoplasmic isoform (EC 5.1.3.1) (Ribulose-5-phosphate-epimerase) (Cyt-RPEase) (RPEcyt) (Pentose-5-phosphate 3-epimerase) (PPE) - Oryza sativa (Rice) & (at3g01850 : 157.0) Aldolase-type TIM barrel family protein; FUNCTIONS IN: ribulose-phosphate 3-epimerase activity, catalytic activity; INVOLVED IN: carbohydrate metabolic process, metab…	T
'7.3'	'OPP.electron transfer'	'zm00001d038291'	'(p94044|fer6_maize : 276.0) Ferredoxin-6, chloroplast precursor (Ferredoxin VI) (Fd VI) - Zea mays (Maize) & (at2g27510 : 142.0) ferredoxin 3 (FD3); FUNCTIONS IN: electron carrier activity, iron-sulfur cluster binding, 2 iron, 2 sulfur cluster binding; INVOLVED IN: electron transport chain; LOCATED IN: chloroplast; EXPRESSED IN: 22 plant structures; EXPRESSED DURING: 13 growth stages; CONTAINS I…	T
'8.1.3'	'TCA / org transformation.TCA.aconitase'	'zm00001d015497'	'(q6yzx6|acoc_orysa : 228.0) Putative aconitate hydratase, cytoplasmic (EC 4.2.1.3) (Citrate hydro-lyase) (Aconitase) - Oryza sativa (Rice) & (at4g26970 : 213.0) Encodes an aconitase that can catalyze the conversion of citrate to isocitrate through a cis-aconitate intermediate, indicating that it may participate in the TCA cycle and other primary metabolic pathways. The protein is believed to acc…	T
'8.1.4'	'TCA / org transformation.TCA.IDH'	'zm00001d025690'	'(at4g35260 : 272.0) Encodes a regulatory subunit of the mitochondrially-localized NAD+- dependent isocitrate dehydrogenase.; isocitrate dehydrogenase 1 (IDH1); CONTAINS InterPro DOMAIN/s: Isocitrate/isopropylmalate dehydrogenase (InterPro:IPR001804), Isocitrate dehydrogenase NAD-dependent, mitochondrial (InterPro:IPR004434); BEST Arabidopsis thaliana protein match is: isocitrate dehydrogenase su…	T
'8.2.4'	'TCA / org transformation.other organic acid transformatons.IDH'	'zm00001d025690'	'(at4g35260 : 272.0) Encodes a regulatory subunit of the mitochondrially-localized NAD+- dependent isocitrate dehydrogenase.; isocitrate dehydrogenase 1 (IDH1); CONTAINS InterPro DOMAIN/s: Isocitrate/isopropylmalate dehydrogenase (InterPro:IPR001804), Isocitrate dehydrogenase NAD-dependent, mitochondrial (InterPro:IPR004434); BEST Arabidopsis thaliana protein match is: isocitrate dehydrogenase su…	T
'8.2.99'	'TCA / org transformation.other organic acid transformatons.misc'	'zm00001d015404'	'(at1g79440 : 236.0) Encodes a mitochondrial succinic semialdehyde dehydrogenase (SSADH). Nomenclature according to Kirch, et al (2004).; aldehyde dehydrogenase 5F1 (ALDH5F1); FUNCTIONS IN: 3-chloroallyl aldehyde dehydrogenase activity, NAD or NADH binding, copper ion binding, succinate-semialdehyde dehydrogenase activity; INVOLVED IN: in 6 processes; LOCATED IN: mitochondrion, chloroplast, mitoc…	T
'9'	'mitochondrial electron transport / ATP synthesis'	'zm00001d014772'	'(at4g34700 : 182.0) LYR family of Fe/S cluster biogenesis protein; FUNCTIONS IN: catalytic activity; INVOLVED IN: photorespiration; LOCATED IN: mitochondrial membrane, plasma membrane, respiratory chain complex I; EXPRESSED IN: 25 plant structures; EXPRESSED DURING: 15 growth stages; Has 30201 Blast hits to 17322 proteins in 780 species: Archae - 12; Bacteria - 1396; Metazoa - 17338; Fungi - 342…	T
'9.1.1'	'mitochondrial electron transport / ATP synthesis.NADH-DH.complex I'	'zm00001d016864'	'(at1g14450 : 92.8) NADH dehydrogenase (ubiquinone)s; FUNCTIONS IN: NADH dehydrogenase (ubiquinone) activity; INVOLVED IN: photorespiration; LOCATED IN: mitochondrial membrane, respiratory chain complex I; EXPRESSED IN: 23 plant structures; EXPRESSED DURING: 15 growth stages; CONTAINS InterPro DOMAIN/s: NADH:ubiquinone oxidoreductase, B12 subunit (InterPro:IPR012576); BEST Arabidopsis thaliana pr…	T
'9.1.2'	'mitochondrial electron transport / ATP synthesis.NADH-DH.localisation not clear'	'zm00001d043619'	'(at5g11770 : 135.0) NADH-ubiquinone oxidoreductase 20 kDa subunit, mitochondrial; FUNCTIONS IN: NADH dehydrogenase (ubiquinone) activity, zinc ion binding; INVOLVED IN: oxidation reduction, mitochondrial electron transport, NADH to ubiquinone; LOCATED IN: mitochondrion, respiratory chain complex I; EXPRESSED IN: 25 plant structures; EXPRESSED DURING: 15 growth stages; CONTAINS InterPro DOMAIN/s:…	T
'9.5'	'mitochondrial electron transport / ATP synthesis.cytochrome c reductase'	'zm00001d016619'	'(p49727|ucri_maize : 416.0) Ubiquinol-cytochrome c reductase iron-sulfur subunit, mitochondrial precursor (EC 1.10.2.2) (Rieske iron-sulfur protein) (RISP) - Zea mays (Maize) & (at5g13430 : 365.0) Ubiquinol-cytochrome C reductase iron-sulfur subunit; FUNCTIONS IN: metal ion binding; INVOLVED IN: oxidation reduction; LOCATED IN: mitochondrion, mitochondrial respiratory chain complex III, membrane…	T
'9.6'	'mitochondrial electron transport / ATP synthesis.cytochrome c'	'zm00001d042600'	'(p00055|cyc_orysa : 226.0) Cytochrome c - Oryza sativa (Rice) & (at4g10040 : 216.0) Encodes cytochrome c. Promoter directs preferential expression in vascular tissues of cotyledons, leaves, roots, and hypocotyls, and in anthers.; cytochrome c-2 (CYTC-2); CONTAINS InterPro DOMAIN/s: Cytochrome c, class IA/ IB (InterPro:IPR002327), Cytochrome c, class I (InterPro:IPR003088), Cytochrome c domain (I…	T
'9.7'	'mitochondrial electron transport / ATP synthesis.cytochrome c oxidase'	'zm00001d051055'	'(at4g28060 : 116.0) Cytochrome c oxidase, subunit Vib family protein; FUNCTIONS IN: cytochrome-c oxidase activity; LOCATED IN: mitochondrion; CONTAINS InterPro DOMAIN/s: Cytochrome c oxidase, subunit VIb (InterPro:IPR003213); BEST Arabidopsis thaliana protein match is: Cytochrome c oxidase, subunit Vib family protein (TAIR:AT5G57815.1); Has 578 Blast hits to 578 proteins in 174 species: Archae -…	T
'9.8'	'mitochondrial electron transport / ATP synthesis.uncoupling protein'	'zm00001d048583'	'(at3g54110 : 416.0) Member of Uncoupling protein PUMP2 family. Encodes a mitochondrial uncoupling protein AtUCP1 involved in maintain the redox poise of the mitochondrial electron transport chain to facilitate photosynthetic metabolism. Disruption of UCP1 results in a photosynthetic phenotype. Specifically there is a restriction in photorespiration with a decrease in the rate of oxidation of pho…	T
'10.1.1.1'	'cell wall.precursor synthesis.NDP sugar pyrophosphorylase.GDP mannose'	'zm00001d028572'	'(at2g39770 : 640.0) Encodes a GDP-mannose pyrophosphorylase/ mannose-1-pyrophosphatase. This enzyme provides GDP-mannose, which is used for cell wall carbohydrate biosynthesis and protein glycosylation as well as for ascorbate (vitamin C) biosynthesis. Mutations in this gene confer hypersensitivity to NH4+.; CYTOKINESIS DEFECTIVE 1 (CYT1); CONTAINS InterPro DOMAIN/s: Trimeric LpxA-like (InterPro…	T
'10.1.1.20'	'cell wall.precursor synthesis.NDP sugar pyrophosphorylase.multiple NDP-Sugars'	'zm00001d014674'	'(at5g52560 : 396.0) Encodes a protein with UTP:sugar 1-phosphate uridylyltransferase activity, which has been shown to use a wide range of substrates including glucose-1-P, galactose-1-P, xylose-1-P, arabinose-1-P and glucuronate-1-P. The enzyme was shown to require Mg2+ or Mn2+ for activity. Mutations in USP can lead to a complete loss of male fertility.; UDP-sugar pyrophosphorylase (USP); FUNC…	T
'10.2.1'	'cell wall.cellulose synthesis.cellulose synthase'	'zm00001d046127'	'(at4g32410 : 737.0) Encodes a cellulose synthase isomer. CESA1 mutants have cellulose defect in the primary cell wall. Multiple lines of evidence suggest that CESA1, along with CESA3 and CESA6 are present in the same plasma membrane complex for cellulose biosynthesis. lasma membrane complex for cellulose biosynthesis. As inferred from the null role of secondary wall-type CesAs, included in a set…	T
'10.2.2'	'cell wall.cellulose synthesis.COBRA'	'zm00001d047276'	'(q6vsv1|cobl5_orysa : 727.0) COBRA-like 5 protein precursor (Protein BRITTLE CULM1) - Oryza sativa (Rice) & (at5g15630 : 645.0) Encodes a member of the COBRA family, similar to phytochelatin synthetase. Involved in secondary cell wall biosynthesis. Mutants make smaller plants with reduced levels of cellulose and cell wall sugars.; IRREGULAR XYLEM 6 (IRX6); INVOLVED IN: secondary cell wall biogen…	T
'10.3'	'cell wall.hemicellulose synthesis'	'zm00001d013052'	'(at5g62620 : 797.0) Galactosyltransferase family protein; FUNCTIONS IN: transferase activity, transferring hexosyl groups, sugar binding, galactosyltransferase activity; INVOLVED IN: protein amino acid glycosylation; EXPRESSED IN: 22 plant structures; EXPRESSED DURING: 13 growth stages; CONTAINS InterPro DOMAIN/s: Galectin, carbohydrate recognition domain (InterPro:IPR001079), Glycosyl transfera…	T
'10.3.2'	'cell wall.hemicellulose synthesis.glucuronoxylan'	'zm00001d035494'	'(at2g37090 : 145.0) The IRX9 gene encodes a putative family 43 glycosyl transferase. It was coordinately expressed with the cellulose synthase subunits during secondary cell wall formation. Cell wall analysis revealed a decrease in the abundance of xylan in the irx9 mutant, indicating that IRX9 is required for xylan synthesis. Mutants have irregular xylem phenotype suggesting a role in secondary…	T
'10.3.2'	'cell wall.hemicellulose synthesis.glucuronoxylan'	'zm00001d016806'	'(at3g18660 : 563.0) Plants expressing an RNAi construct specifically targeting PGSIP1 was shown to have a dramatically reduced amount of starch.; plant glycogenin-like starch initiation protein 1 (PGSIP1); FUNCTIONS IN: transferase activity, transferring glycosyl groups; INVOLVED IN: biosynthetic process, starch metabolic process; LOCATED IN: chloroplast; EXPRESSED IN: 19 plant structures; EXPRE…	T
'10.5.1.1'	'cell wall.cell wall proteins.AGPs.AGP'	'zm00001d052864'	'(at2g04780 : 184.0) fasciclin-like arabinogalactan-protein 7 (Fla7); FASCICLIN-like arabinoogalactan 7 (FLA7); LOCATED IN: anchored to plasma membrane, plasma membrane, anchored to membrane, membrane; EXPRESSED IN: 22 plant structures; EXPRESSED DURING: 13 growth stages; CONTAINS InterPro DOMAIN/s: FAS1 domain (InterPro:IPR000782); BEST Arabidopsis thaliana protein match is: FASCICLIN-like arabi…	T
'10.5.1.1'	'cell wall.cell wall proteins.AGPs.AGP'	'zm00001d039770'	'(at5g03170 : 168.0) FASCICLIN-like arabinogalactan-protein 11 (FLA11); CONTAINS InterPro DOMAIN/s: FAS1 domain (InterPro:IPR000782); BEST Arabidopsis thaliana protein match is: FASCICLIN-like arabinogalactan-protein 12 (TAIR:AT5G60490.1); Has 965 Blast hits to 948 proteins in 162 species: Archae - 18; Bacteria - 233; Metazoa - 22; Fungi - 18; Plants - 634; Viruses - 0; Other Eukaryotes - 40 (sou…	T
'10.6'	'cell wall.degradation'	'zm00001d026072'	'(at5g62150 : 101.0) peptidoglycan-binding LysM domain-containing protein; FUNCTIONS IN: molecular_function unknown; INVOLVED IN: cell wall macromolecule catabolic process; LOCATED IN: endomembrane system; EXPRESSED IN: 15 plant structures; EXPRESSED DURING: 6 growth stages; BEST Arabidopsis thaliana protein match is: peptidoglycan-binding LysM domain-containing protein (TAIR:AT4G25433.1); Has 63…	T
'10.6.2'	'cell wall.degradation.mannan-xylose-arabinose-fucose'	'zm00001d024071'	'(q76bw5|xth8_orysa : 373.0) Xyloglucan endotransglycosylase/hydrolase protein 8 precursor (EC 2.4.1.207) (End-xyloglucan transferase) (OsXTH8) (OsXRT5) - Oryza sativa (Rice) & (at5g57560 : 248.0) Encodes a cell wall-modifying enzyme, rapidly upregulated in response to environmental stimuli; Touch 4 (TCH4); CONTAINS InterPro DOMAIN/s: Xyloglucan endotransglucosylase/hydrolase (InterPro:IPR016455)…	T
'10.6.3'	'cell wall.degradation.pectate lyases and polygalacturonases'	'zm00001d035899'	'(at3g61490 : 607.0) Pectin lyase-like superfamily protein; FUNCTIONS IN: polygalacturonase activity; INVOLVED IN: carbohydrate metabolic process; LOCATED IN: endomembrane system; EXPRESSED IN: 22 plant structures; EXPRESSED DURING: 14 growth stages; CONTAINS InterPro DOMAIN/s: Pectin lyase fold/virulence factor (InterPro:IPR011050), Glycoside hydrolase, family 28 (InterPro:IPR000743), Pectin lya…	T
'10.6.3'	'cell wall.degradation.pectate lyases and polygalacturonases'	'zm00001d017416'	'(at3g55140 : 470.0) Pectin lyase-like superfamily protein; CONTAINS InterPro DOMAIN/s: Pectin lyase fold/virulence factor (InterPro:IPR011050), AmbAllergen (InterPro:IPR018082), Pectate lyase/Amb allergen (InterPro:IPR002022), Pectin lyase fold (InterPro:IPR012334); BEST Arabidopsis thaliana protein match is: Pectin lyase-like superfamily protein (TAIR:AT3G09540.1); Has 35333 Blast hits to 34131…	T
'10.6.3'	'cell wall.degradation.pectate lyases and polygalacturonases'	'zm00001d015129'	'(at1g23460 : 458.0) Pectin lyase-like superfamily protein; FUNCTIONS IN: polygalacturonase activity; INVOLVED IN: carbohydrate metabolic process; LOCATED IN: endomembrane system; CONTAINS InterPro DOMAIN/s: Pectin lyase fold/virulence factor (InterPro:IPR011050), Pectin lyase fold (InterPro:IPR012334), Parallel beta-helix repeat (InterPro:IPR006626), Glycoside hydrolase, family 28 (InterPro:IPR0…	T
'10.7'	'cell wall.modification'	'zm00001d036539'	'(at4g30380 : 115.0) Encodes a Plant Natriuretic Peptide (PNP). PNPs are a class of systemically mobile molecules distantly related to expansins; their biological role has remained elusive.; Barwin-related endoglucanase; FUNCTIONS IN: molecular_function unknown; INVOLVED IN: biological_process unknown; LOCATED IN: endomembrane system; CONTAINS InterPro DOMAIN/s: Barwin-related endoglucanase (Inte…	T
'10.7'	'cell wall.modification'	'zm00001d024071'	'(q76bw5|xth8_orysa : 373.0) Xyloglucan endotransglycosylase/hydrolase protein 8 precursor (EC 2.4.1.207) (End-xyloglucan transferase) (OsXTH8) (OsXRT5) - Oryza sativa (Rice) & (at5g57560 : 248.0) Encodes a cell wall-modifying enzyme, rapidly upregulated in response to environmental stimuli; Touch 4 (TCH4); CONTAINS InterPro DOMAIN/s: Xyloglucan endotransglucosylase/hydrolase (InterPro:IPR016455)…	T
'10.8.1'	'cell wall.pectin*esterases.PME'	'zm00001d032992'	'(at3g29090 : 462.0) Encodes an atypical pectin methylesterase that does not require salt for its activity and has a blockwise mode of pectin demethylesterification.; pectin methylesterase 31 (PME31); FUNCTIONS IN: pectinesterase activity; INVOLVED IN: pectin metabolic process; LOCATED IN: cell wall, plant-type cell wall; EXPRESSED IN: 23 plant structures; EXPRESSED DURING: 13 growth stages; CONT…	T
'11.1.10'	'lipid metabolism.FA synthesis and FA elongation.beta ketoacyl CoA synthase'	'zm00001d016438'	'(at2g26640 : 756.0) Encodes KCS11, a member of the 3-ketoacyl-CoA synthase family involved in the biosynthesis of VLCFA (very long chain fatty acids).; 3-ketoacyl-CoA synthase 11 (KCS11); FUNCTIONS IN: transferase activity, transferring acyl groups other than amino-acyl groups, catalytic activity; INVOLVED IN: response to cold, response to light stimulus, response to osmotic stress; LOCATED IN: …	T
'11.1.10'	'lipid metabolism.FA synthesis and FA elongation.beta ketoacyl CoA synthase'	'zm00001d005430'	'(at2g26640 : 271.0) Encodes KCS11, a member of the 3-ketoacyl-CoA synthase family involved in the biosynthesis of VLCFA (very long chain fatty acids).; 3-ketoacyl-CoA synthase 11 (KCS11); FUNCTIONS IN: transferase activity, transferring acyl groups other than amino-acyl groups, catalytic activity; INVOLVED IN: response to cold, response to light stimulus, response to osmotic stress; LOCATED IN: …	T
'11.1.13'	'lipid metabolism.FA synthesis and FA elongation.acyl-CoA binding protein'	'zm00001d024518'	'(o04066|acbp_ricco : 142.0) Acyl-CoA-binding protein (ACBP) - Ricinus communis (Castor bean) & (at1g31812 : 123.0) Acyl-CoA-binding protein. Bind acyl-CoA esters and protect acyl-CoAs from degradation by microsomal acyl-hydrolases.; acyl-CoA-binding protein 6 (ACBP6); FUNCTIONS IN: phosphatidylcholine binding, acyl-CoA binding; INVOLVED IN: response to freezing, response to cold, lipid transport…	T
'11.1.15'	'lipid metabolism.FA synthesis and FA elongation.ACP desaturase'	'zm00001d025170'	'(q40731|stad_orysa : 661.0) Acyl-[acyl-carrier-protein] desaturase, chloroplast precursor (EC 1.14.19.2) (Stearoyl-ACP desaturase) - Oryza sativa (Rice) & (at2g43710 : 583.0) Encodes a stearoyl-ACP desaturase, involved in fatty acid desaturation. The ssi2 mutants have increased 18:0 and reduced 18:1 fatty acids. Exogenous application of glycerol to wild type plants mimics the ssi2 mutant phenoty…	T
'11.3.2'	'lipid metabolism.Phospholipid synthesis.choline kinase'	'zm00001d043652'	'(at1g71697 : 350.0) Encodes choline kinase. mRNA levels are increased in response to wounding.; choline kinase 1 (CK1); FUNCTIONS IN: choline kinase activity; INVOLVED IN: response to salt stress, response to wounding; LOCATED IN: cellular_component unknown; EXPRESSED IN: 24 plant structures; EXPRESSED DURING: 15 growth stages; CONTAINS InterPro DOMAIN/s: Choline kinase, N-terminal (InterPro:IPR…	T
'11.4'	'lipid metabolism.TAG synthesis'	'zm00001d051800'	'(at1g70670 : 136.0) Caleosin-related family protein; CONTAINS InterPro DOMAIN/s: Caleosin related (InterPro:IPR007736); BEST Arabidopsis thaliana protein match is: Caleosin-related family protein (TAIR:AT1G70680.1); Has 341 Blast hits to 336 proteins in 61 species: Archae - 0; Bacteria - 0; Metazoa - 0; Fungi - 60; Plants - 278; Viruses - 0; Other Eukaryotes - 3 (source: NCBI BLink). & (reliabil…	T
'11.6'	'lipid metabolism.lipid transfer proteins etc'	'zm00001d044686'	'(p19656|nltp_maize : 154.0) Nonspecific lipid-transfer protein precursor (LTP) (Phospholipid transfer protein) (PLTP) (Allergen Zea m 14) - Zea mays (Maize) & (at2g38540 : 95.1) Non-specific lipid transfer protein. Binds calmodulin in a Ca2+-independent manner. Localized to the cell wall. Specifically expressed in L1 epidermal layer. Predicted to be a member of PR-14 pathogenesis-related protein…	T
'11.7'	'lipid metabolism.unassigned'	'zm00001d021073'	'(at1g54570 : 589.0) Esterase/lipase/thioesterase family protein; FUNCTIONS IN: transferase activity, transferring acyl groups other than amino-acyl groups, catalytic activity; LOCATED IN: chloroplast, plastoglobule; EXPRESSED IN: 22 plant structures; EXPRESSED DURING: 13 growth stages; CONTAINS InterPro DOMAIN/s: Diacylglycerol acyltransferase (InterPro:IPR007130); BEST Arabidopsis thaliana prot…	T
'11.8.1'	'lipid metabolism.'exotics' (steroids, squalene etc).sphingolipids'	'zm00001d005624'	'(at2g46210 : 537.0) Fatty acid/sphingolipid desaturase; FUNCTIONS IN: oxidoreductase activity, oxidoreductase activity, acting on paired donors, with oxidation of a pair of donors resulting in the reduction of molecular oxygen to two molecules of water, iron ion binding, heme binding; INVOLVED IN: oxidation reduction, fatty acid biosynthetic process, lipid metabolic process; EXPRESSED IN: 23 pla…	T
'11.9'	'lipid metabolism.lipid degradation'	'zm00001d051130'	'(at4g28570 : 648.0) Long-chain fatty alcohol dehydrogenase family protein; FUNCTIONS IN: electron carrier activity, oxidoreductase activity, acting on CH-OH group of donors, FAD binding; LOCATED IN: endoplasmic reticulum; EXPRESSED IN: 25 plant structures; EXPRESSED DURING: 13 growth stages; CONTAINS InterPro DOMAIN/s: Glucose-methanol-choline oxidoreductase, N-terminal (InterPro:IPR000172), Glu…	T
'11.9.2'	'lipid metabolism.lipid degradation.lipases'	'zm00001d037828'	'(at1g28580 : 212.0) GDSL-like Lipase/Acylhydrolase superfamily protein; FUNCTIONS IN: lipase activity, hydrolase activity, acting on ester bonds, carboxylesterase activity; INVOLVED IN: lipid metabolic process; LOCATED IN: vacuole; EXPRESSED IN: 22 plant structures; EXPRESSED DURING: 13 growth stages; CONTAINS InterPro DOMAIN/s: Lipase, GDSL (InterPro:IPR001087); BEST Arabidopsis thaliana protei…	T
'11.9.2.1'	'lipid metabolism.lipid degradation.lipases.triacylglycerol lipase'	'zm00001d025734'	'(at1g05790 : 467.0) lipase class 3 family protein; FUNCTIONS IN: triglyceride lipase activity; INVOLVED IN: lipid metabolic process; EXPRESSED IN: 24 plant structures; EXPRESSED DURING: 15 growth stages; CONTAINS InterPro DOMAIN/s: Lipase, class 3 (InterPro:IPR002921); BEST Arabidopsis thaliana protein match is: alpha/beta-Hydrolases superfamily protein (TAIR:AT2G42450.1); Has 496 Blast hits to …	T
'11.9.2.1'	'lipid metabolism.lipid degradation.lipases.triacylglycerol lipase'	'zm00001d011477'	'(at4g18550 : 333.0) alpha/beta-Hydrolases superfamily protein; FUNCTIONS IN: triglyceride lipase activity; INVOLVED IN: lipid metabolic process; LOCATED IN: cellular_component unknown; EXPRESSED IN: 7 plant structures; EXPRESSED DURING: 4 anthesis, petal differentiation and expansion stage; CONTAINS InterPro DOMAIN/s: Lipase, class 3 (InterPro:IPR002921); BEST Arabidopsis thaliana protein match …	T
'11.9.3.1'	'lipid metabolism.lipid degradation.lysophospholipases.phospholipase D'	'zm00001d015256'	'(at4g11830 : 339.0) Encodes one of three phospholipase D enzymes of the gamma class.; phospholipase D gamma 2 (PLDGAMMA2); FUNCTIONS IN: phospholipase D activity; INVOLVED IN: phospholipid catabolic process; LOCATED IN: cytosolic ribosome, chloroplast; EXPRESSED IN: 23 plant structures; EXPRESSED DURING: 13 growth stages; CONTAINS InterPro DOMAIN/s: C2 membrane targeting protein (InterPro:IPR018…	T
'11.9.3.2'	'lipid metabolism.lipid degradation.lysophospholipases.carboxylesterase'	'zm00001d031801'	'(at1g47480 : 194.0) alpha/beta-Hydrolases superfamily protein; FUNCTIONS IN: hydrolase activity; INVOLVED IN: metabolic process; LOCATED IN: cellular_component unknown; EXPRESSED IN: stem, hypocotyl, root, flower; EXPRESSED DURING: petal differentiation and expansion stage; CONTAINS InterPro DOMAIN/s: Lipase, GDXG, active site (InterPro:IPR002168), Alpha/beta hydrolase fold-3 (InterPro:IPR013094…	T
'11.9.3.2'	'lipid metabolism.lipid degradation.lysophospholipases.carboxylesterase'	'zm00001d020744'	'(at1g19190 : 200.0) alpha/beta-Hydrolases superfamily protein; FUNCTIONS IN: hydrolase activity; INVOLVED IN: metabolic process; LOCATED IN: cellular_component unknown; EXPRESSED IN: inflorescence meristem, root, flower; EXPRESSED DURING: petal differentiation and expansion stage; CONTAINS InterPro DOMAIN/s: Lipase, GDXG, active site (InterPro:IPR002168), Alpha/beta hydrolase fold-3 (InterPro:IP…	T
'11.9.3.3'	'lipid metabolism.lipid degradation.lysophospholipases.glycerophosphodiester phosphodiesterase'	'zm00001d050917'	'(at4g26690 : 696.0) Glycerophosphoryl diester phosphodiesterase-like protein involved in cell wall cellulose accumulation and pectin linking. Impacts root hair, trichome and epidermal cell development.; SHAVEN 3 (SHV3); FUNCTIONS IN: glycerophosphodiester phosphodiesterase activity, kinase activity; INVOLVED IN: in 8 processes; LOCATED IN: anchored to plasma membrane, plasma membrane, anchored t…	T
'11.9.3.3'	'lipid metabolism.lipid degradation.lysophospholipases.glycerophosphodiester phosphodiesterase'	'zm00001d008477'	'(at5g38260 : 211.0) Protein kinase superfamily protein; FUNCTIONS IN: kinase activity; INVOLVED IN: protein amino acid phosphorylation; LOCATED IN: endomembrane system; CONTAINS InterPro DOMAIN/s: Protein kinase, ATP binding site (InterPro:IPR017441), Protein kinase, catalytic domain (InterPro:IPR000719), Serine-threonine/tyrosine-protein kinase (InterPro:IPR001245), Protein kinase-like domain (…	T
'11.9.4.13'	'lipid metabolism.lipid degradation.beta-oxidation.acyl CoA reductase'	'zm00001d019850'	'(at3g44540 : 380.0) Encodes a member of the eight-member gene family encoding alcohol-forming fatty acyl-CoA reductases (FARs) identified in Arabidopsis thaliana. Three of the FARs, FAR1 (At5g22500), FAR4 (At3g44540) and FAR5 (At3g44550), are shown to generate the fatty alcohols found in root, seed coat, and wound-induced leaf tissue.; fatty acid reductase 4 (FAR4); CONTAINS InterPro DOMAIN/s: N…	T
'11.9.4.5'	'lipid metabolism.lipid degradation.beta-oxidation.acyl-CoA thioesterase'	'zm00001d031801'	'(at1g47480 : 194.0) alpha/beta-Hydrolases superfamily protein; FUNCTIONS IN: hydrolase activity; INVOLVED IN: metabolic process; LOCATED IN: cellular_component unknown; EXPRESSED IN: stem, hypocotyl, root, flower; EXPRESSED DURING: petal differentiation and expansion stage; CONTAINS InterPro DOMAIN/s: Lipase, GDXG, active site (InterPro:IPR002168), Alpha/beta hydrolase fold-3 (InterPro:IPR013094…	T
'11.9.4.5'	'lipid metabolism.lipid degradation.beta-oxidation.acyl-CoA thioesterase'	'zm00001d026704'	'(at1g04290 : 129.0) Thioesterase superfamily protein; FUNCTIONS IN: hydrolase activity, acting on ester bonds, acyl-CoA thioesterase activity; INVOLVED IN: biological_process unknown; LOCATED IN: peroxisome; EXPRESSED IN: 24 plant structures; EXPRESSED DURING: 15 growth stages; CONTAINS InterPro DOMAIN/s: Thioesterase superfamily (InterPro:IPR006683), Phenylacetic acid degradation-related protei…	T
'11.9.4.5'	'lipid metabolism.lipid degradation.beta-oxidation.acyl-CoA thioesterase'	'zm00001d020744'	'(at1g19190 : 200.0) alpha/beta-Hydrolases superfamily protein; FUNCTIONS IN: hydrolase activity; INVOLVED IN: metabolic process; LOCATED IN: cellular_component unknown; EXPRESSED IN: inflorescence meristem, root, flower; EXPRESSED DURING: petal differentiation and expansion stage; CONTAINS InterPro DOMAIN/s: Lipase, GDXG, active site (InterPro:IPR002168), Alpha/beta hydrolase fold-3 (InterPro:IP…	T
'13.1.1.1.1'	'amino acid metabolism.synthesis.central amino acid metabolism.GABA.Glutamate decarboxylase'	'zm00001d047981'	'(at5g17330 : 830.0) Encodes one of two isoforms of glutamate decarboxylase.; glutamate decarboxylase (GAD); FUNCTIONS IN: calmodulin binding, glutamate decarboxylase activity; INVOLVED IN: response to cadmium ion; EXPRESSED IN: 13 plant structures; EXPRESSED DURING: 6 growth stages; CONTAINS InterPro DOMAIN/s: Pyridoxal phosphate-dependent transferase, major domain (InterPro:IPR015424), Pyridoxa…	T
'13.1.1.1.1'	'amino acid metabolism.synthesis.central amino acid metabolism.GABA.Glutamate decarboxylase'	'zm00001d003522'	'(q07346|dce_pethy : 689.0) Glutamate decarboxylase (EC 4.1.1.15) (GAD) - Petunia hybrida (Petunia) & (at1g65960 : 688.0) glutamate decarboxylase (GAD2); glutamate decarboxylase 2 (GAD2); CONTAINS InterPro DOMAIN/s: Pyridoxal phosphate-dependent transferase, major domain (InterPro:IPR015424), Pyridoxal phosphate-dependent decarboxylase (InterPro:IPR002129), Glutamate decarboxylase (InterPro:IPR01…	T
'13.1.1.1.2'	'amino acid metabolism.synthesis.central amino acid metabolism.GABA.GABA transaminase'	'zm00001d037507'	'(at3g22200 : 99.0) Genetically redundant with POP3;mediates pollen tube guidance. Double mutants are self sterile; gamma-aminobutyrate transaminase subunit precursor; nuclear gene for mitochondrial product. Encodes gamma-aminobutyrate transaminase that uses pyruvate instead of alpha-ketoglutarate as cosubstrate. Mutations in POP2/HER1 render roots resistant to the inhibitory growth effects of th…	T
'13.1.1.1.2'	'amino acid metabolism.synthesis.central amino acid metabolism.GABA.GABA transaminase'	'zm00001d015445'	'(at3g22200 : 136.0) Genetically redundant with POP3;mediates pollen tube guidance. Double mutants are self sterile; gamma-aminobutyrate transaminase subunit precursor; nuclear gene for mitochondrial product. Encodes gamma-aminobutyrate transaminase that uses pyruvate instead of alpha-ketoglutarate as cosubstrate. Mutations in POP2/HER1 render roots resistant to the inhibitory growth effects of t…	T
'13.1.1.1.2'	'amino acid metabolism.synthesis.central amino acid metabolism.GABA.GABA transaminase'	'zm00001d015444'	'(at3g22200 : 87.8) Genetically redundant with POP3;mediates pollen tube guidance. Double mutants are self sterile; gamma-aminobutyrate transaminase subunit precursor; nuclear gene for mitochondrial product. Encodes gamma-aminobutyrate transaminase that uses pyruvate instead of alpha-ketoglutarate as cosubstrate. Mutations in POP2/HER1 render roots resistant to the inhibitory growth effects of th…	T
'13.1.3.4'	'amino acid metabolism.synthesis.aspartate family.methionine'	'zm00001d013644'	'(q42699|mete_catro : 1312.0) 5-methyltetrahydropteroyltriglutamate--homocysteine methyltransferase (EC 2.1.1.14) (Vitamin-B12-independent methionine synthase isozyme) (Cobalamin-independent methionine synthase isozyme) - Catharanthus roseus (Rosy periwinkle) (Madag & (at5g17920 : 1299.0) Encodes a cytosolic cobalamin-independent methionine synthase, involved in methionine regeneration via the ac…	T
'13.1.3.4.3'	'amino acid metabolism.synthesis.aspartate family.methionine.methionine synthase'	'zm00001d013644'	'(q42699|mete_catro : 1312.0) 5-methyltetrahydropteroyltriglutamate--homocysteine methyltransferase (EC 2.1.1.14) (Vitamin-B12-independent methionine synthase isozyme) (Cobalamin-independent methionine synthase isozyme) - Catharanthus roseus (Rosy periwinkle) (Madag & (at5g17920 : 1299.0) Encodes a cytosolic cobalamin-independent methionine synthase, involved in methionine regeneration via the ac…	T
'13.1.3.5.3'	'amino acid metabolism.synthesis.aspartate family.lysine.LL-diaminopimelic acid aminotransferase'	'zm00001d028165'	'(at4g33680 : 497.0) Involved in disease resistance against Pseudomonas syringae. mutants have elevated SA levels, a low level of spontaneous cell death, callose deposition, and enlarged cells in leaves. genetically maps on chr 4 between L23H3 and nga1139.; ABERRANT GROWTH AND DEATH 2 (AGD2); FUNCTIONS IN: transaminase activity, copper ion binding, L,L-diaminopimelate aminotransferase activity; I…	T
'13.1.5.1.1'	'amino acid metabolism.synthesis.serine-glycine-cysteine group.serine.phosphoglycerate dehydrogenase'	'zm00001d046923'	'(at4g34200 : 652.0) embryo sac development arrest 9 (EDA9); FUNCTIONS IN: ATP binding; INVOLVED IN: megagametogenesis; LOCATED IN: mitochondrion, chloroplast, membrane; EXPRESSED IN: 26 plant structures; EXPRESSED DURING: 14 growth stages; CONTAINS InterPro DOMAIN/s: D-3-phosphoglycerate dehydrogenase (InterPro:IPR006236), D-isomer specific 2-hydroxyacid dehydrogenase, catalytic domain (InterPro…	T
'13.1.5.1.3'	'amino acid metabolism.synthesis.serine-glycine-cysteine group.serine.phosphoserine phosphatase'	'zm00001d041389'	'(at1g18640 : 91.7) Encodes a 3-phosphoserine phosphatase acting in the last step of serine biosynthesis within the chloroplast.; 3-phosphoserine phosphatase (PSP); FUNCTIONS IN: phosphoserine phosphatase activity; INVOLVED IN: L-serine biosynthetic process; LOCATED IN: chloroplast; EXPRESSED IN: 22 plant structures; EXPRESSED DURING: 13 growth stages; CONTAINS InterPro DOMAIN/s: Haloacid dehalog…	T
'13.1.6.2'	'amino acid metabolism.synthesis.aromatic aa.phenylalanine and tyrosine'	'zm00001d028165'	'(at4g33680 : 497.0) Involved in disease resistance against Pseudomonas syringae. mutants have elevated SA levels, a low level of spontaneous cell death, callose deposition, and enlarged cells in leaves. genetically maps on chr 4 between L23H3 and nga1139.; ABERRANT GROWTH AND DEATH 2 (AGD2); FUNCTIONS IN: transaminase activity, copper ion binding, L,L-diaminopimelate aminotransferase activity; I…	T
'13.1.6.3.1'	'amino acid metabolism.synthesis.aromatic aa.phenylalanine.arogenate dehydratase / prephenate dehydratase'	'zm00001d048561'	'(at2g27820 : 260.0) Encodes a plastid-localized arogenate dehydratase involved in phenylalanine biosynthesis. Not less than six genes encoding ADT were identi&#64257;ed in the Arabidopsis genome: ADT1 [At1g11790]; ADT2 [At3g07630]; ADT3 [At2g27820]; ADT4 [At3g44720]; ADT5 [At5g22630]; and ADT6 [At1g08250].; prephenate dehydratase 1 (PD1); CONTAINS InterPro DOMAIN/s: Prephenate dehydratase (Inter…	T
'13.1.6.3.1'	'amino acid metabolism.synthesis.aromatic aa.phenylalanine.arogenate dehydratase / prephenate dehydratase'	'zm00001d025333'	'(at1g08250 : 557.0) Encodes a plastid-localized arogenate dehydratase involved in phenylalanine biosynthesis. Although this enzyme has sequence similarity to prephenate dehydratases, it is 98 times more active with arogenate than prephenate in enzymatic assays.; arogenate dehydratase 6 (ADT6); FUNCTIONS IN: arogenate dehydratase activity, prephenate dehydratase activity; INVOLVED IN: L-phenylala…	T
'13.1.6.5.5'	'amino acid metabolism.synthesis.aromatic aa.tryptophan.tryptophan synthase'	'zm00001d034461'	'(p42390|trpa_maize : 362.0) Indole-3-glycerol phosphate lyase, chloroplast precursor (EC 4.1.2.8) (Indole synthase) (Tryptophan synthase alpha chain) (EC 4.2.1.20) (Benzoxazineless 1) - Zea mays (Maize) & (at4g02610 : 309.0) Aldolase-type TIM barrel family protein; CONTAINS InterPro DOMAIN/s: Tryptophan synthase, alpha chain, active site (InterPro:IPR018204), Aldolase-type TIM barrel (InterPro:I…	T
'13.2.4.5'	'amino acid metabolism.degradation.branched chain group.isoleucine'	'zm00001d031212'	'(at5g48230 : 570.0) acetoacetyl-CoA thiolase 2 (ACAT2); FUNCTIONS IN: transferase activity, transferring acyl groups other than amino-acyl groups, acetyl-CoA C-acetyltransferase activity, catalytic activity; INVOLVED IN: embryo development ending in seed dormancy; LOCATED IN: peroxisome, plasma membrane; EXPRESSED IN: 24 plant structures; EXPRESSED DURING: 13 growth stages; CONTAINS InterPro DOM…	T
'13.2.5.2'	'amino acid metabolism.degradation.serine-glycine-cysteine group.glycine'	'zm00001d014919'	'(p13443|dhgy_cucsa : 533.0) Glycerate dehydrogenase (EC 1.1.1.29) (NADH-dependent hydroxypyruvate reductase) (HPR) (GDH) - Cucumis sativus (Cucumber) & (at1g68010 : 521.0) Encodes hydroxypyruvate reductase.; hydroxypyruvate reductase (HPR); CONTAINS InterPro DOMAIN/s: D-isomer specific 2-hydroxyacid dehydrogenase, catalytic domain (InterPro:IPR006139), D-isomer specific 2-hydroxyacid dehydrogena…	T
'13.2.6.3'	'amino acid metabolism.degradation.aromatic aa.tryptophan'	'zm00001d031212'	'(at5g48230 : 570.0) acetoacetyl-CoA thiolase 2 (ACAT2); FUNCTIONS IN: transferase activity, transferring acyl groups other than amino-acyl groups, acetyl-CoA C-acetyltransferase activity, catalytic activity; INVOLVED IN: embryo development ending in seed dormancy; LOCATED IN: peroxisome, plasma membrane; EXPRESSED IN: 24 plant structures; EXPRESSED DURING: 13 growth stages; CONTAINS InterPro DOM…	T
'15'	'metal handling'	'zm00001d023376'	'(at5g19140 : 247.0) AILP1; FUNCTIONS IN: molecular_function unknown; INVOLVED IN: response to auxin stimulus, response to aluminum ion; LOCATED IN: plasma membrane; EXPRESSED IN: 23 plant structures; EXPRESSED DURING: 13 growth stages; BEST Arabidopsis thaliana protein match is: Aluminium induced protein with YGL and LRDR motifs (TAIR:AT5G43830.1); Has 840 Blast hits to 840 proteins in 265 speci…	T
'15.2'	'metal handling.binding, chelation and storage'	'zm00001d022557'	'(q9xfb7|nas9_horvu : 435.0) Nicotianamine synthase 9 (EC 2.5.1.43) (S-adenosyl-L-methionine:S-adenosyl-L-methionine:S-adenosyl-methionine 3-amino-3-carboxypropyltransferase 9) - Hordeum vulgare (Barley) & (at1g56430 : 247.0) Encodes a protein with nicotianamine synthase activity.; nicotianamine synthase 4 (NAS4); CONTAINS InterPro DOMAIN/s: Nicotianamine synthase (InterPro:IPR004298); BEST Arabi…	T
'15.2'	'metal handling.binding, chelation and storage'	'zm00001d016691'	'(at3g56240 : 114.0) CCH protein belongs to a family of eukaryotic proteins that participate in intracellular copper homeostasis by delivering this metal to the secretory pathway; mainly located along the vascular bundles of senescing leaves and petioles as well as in stem sieve elements; hypothesized to have a role in copper mobilization from decaying organs towards reproductive structures, as a…	T
'15.2'	'metal handling.binding, chelation and storage'	'zm00001d016577'	'(at5g63530 : 150.0) Farnesylated protein that binds metals.; farnesylated protein 3 (FP3); FUNCTIONS IN: transition metal ion binding, metal ion binding; INVOLVED IN: cellular transition metal ion homeostasis; LOCATED IN: plasma membrane; EXPRESSED IN: 22 plant structures; EXPRESSED DURING: 13 growth stages; CONTAINS InterPro DOMAIN/s: Heavy metal transport/detoxification protein (InterPro:IPR00…	T
'15.2'	'metal handling.binding, chelation and storage'	'zm00001d013655'	'(q9fxw5|nas3_orysa : 322.0) Nicotianamine synthase 3 (EC 2.5.1.43) (S-adenosyl-L-methionine:S-adenosyl-L-methionine:S-adenosyl-methionine 3-amino-3-carboxypropyltransferase 3) (OsNAS3) - Oryza sativa (Rice) & (at5g04950 : 159.0) Encodes a nicotianamide synthase.; nicotianamine synthase 1 (NAS1); CONTAINS InterPro DOMAIN/s: Nicotianamine synthase (InterPro:IPR004298); BEST Arabidopsis thaliana pr…	T
'15.3'	'metal handling.regulation'	'zm00001d020395'	'(at2g01770 : 270.0) Encodes an iron transporter required for iron sequestration into vacuoles. Expressed in developing embryo and seed. Localized in the vacuolar membrane.; vacuolar iron transporter 1 (VIT1); CONTAINS InterPro DOMAIN/s: Protein of unknown function DUF125, transmembrane (InterPro:IPR008217); Has 1947 Blast hits to 1945 proteins in 688 species: Archae - 106; Bacteria - 1196; Metaz…	T
'16.1'	'secondary metabolism.isoprenoids'	'zm00001d024211'	'(p93665|dcs1_goshi : 377.0) (+)-delta-cadinene synthase (EC 4.2.3.13) (D-cadinene synthase) - Gossypium hirsutum (Upland cotton) & (at1g70080 : 285.0) Terpenoid cyclases/Protein prenyltransferases superfamily protein; FUNCTIONS IN: lyase activity, magnesium ion binding; INVOLVED IN: metabolic process; EXPRESSED IN: root; CONTAINS InterPro DOMAIN/s: Terpene synthase, metal-binding domain (InterPr…	T
'16.1'	'secondary metabolism.isoprenoids'	'zm00001d024208'	'(p93665|dcs1_goshi : 373.0) (+)-delta-cadinene synthase (EC 4.2.3.13) (D-cadinene synthase) - Gossypium hirsutum (Upland cotton) & (at1g70080 : 282.0) Terpenoid cyclases/Protein prenyltransferases superfamily protein; FUNCTIONS IN: lyase activity, magnesium ion binding; INVOLVED IN: metabolic process; EXPRESSED IN: root; CONTAINS InterPro DOMAIN/s: Terpene synthase, metal-binding domain (InterPr…	T
'16.1'	'secondary metabolism.isoprenoids'	'zm00001d008370'	'(q43133|ggpps_sinal : 213.0) Geranylgeranyl pyrophosphate synthetase, chloroplast precursor (GGPP synthetase) (GGPS) [Includes: Dimethylallyltranstransferase (EC 2.5.1.1); Geranyltranstransferase (EC 2.5.1.10); Farnesyltranstransferase (EC 2.5.1.29)] - Sinapis alb & (at3g14530 : 207.0) Terpenoid synthases superfamily protein; FUNCTIONS IN: farnesyltranstransferase activity; INVOLVED IN: isopreno…	T
'16.1'	'secondary metabolism.isoprenoids'	'zm00001d006678'	'(q94id7|ggpps_hevbr : 375.0) Geranylgeranyl pyrophosphate synthetase, chloroplast precursor (GGPP synthetase) [Includes: Dimethylallyltranstransferase (EC 2.5.1.1); Geranyltranstransferase (EC 2.5.1.10); Farnesyltranstransferase (EC 2.5.1.29)] - Hevea brasiliensis & (at4g36810 : 362.0) Encodes a protein with geranylgeranyl pyrophosphate synthase activity involved in isoprenoid biosynthesis. The …	T
'16.1.1.10'	'secondary metabolism.isoprenoids.non-mevalonate pathway.geranylgeranyl pyrophosphate synthase'	'zm00001d008370'	'(q43133|ggpps_sinal : 213.0) Geranylgeranyl pyrophosphate synthetase, chloroplast precursor (GGPP synthetase) (GGPS) [Includes: Dimethylallyltranstransferase (EC 2.5.1.1); Geranyltranstransferase (EC 2.5.1.10); Farnesyltranstransferase (EC 2.5.1.29)] - Sinapis alb & (at3g14530 : 207.0) Terpenoid synthases superfamily protein; FUNCTIONS IN: farnesyltranstransferase activity; INVOLVED IN: isopreno…	T
'16.1.1.10'	'secondary metabolism.isoprenoids.non-mevalonate pathway.geranylgeranyl pyrophosphate synthase'	'zm00001d006678'	'(q94id7|ggpps_hevbr : 375.0) Geranylgeranyl pyrophosphate synthetase, chloroplast precursor (GGPP synthetase) [Includes: Dimethylallyltranstransferase (EC 2.5.1.1); Geranyltranstransferase (EC 2.5.1.10); Farnesyltranstransferase (EC 2.5.1.29)] - Hevea brasiliensis & (at4g36810 : 362.0) Encodes a protein with geranylgeranyl pyrophosphate synthase activity involved in isoprenoid biosynthesis. The …	T
'16.1.1.2'	'secondary metabolism.isoprenoids.non-mevalonate pathway.DXR'	'zm00001d008427'	'(q8w250|dxr_orysa : 773.0) 1-deoxy-D-xylulose 5-phosphate reductoisomerase, chloroplast precursor (EC 1.1.1.267) (DXP reductoisomerase) (1-deoxyxylulose-5-phosphate reductoisomerase) (2-C-methyl-D-erythritol 4-phosphate synthase) - Oryza sativa (Rice) & (at5g62790 : 679.0) 1-Deoxy-d-xylulose 5-phosphate reductoisomerase (DXR) catalyzes the first committed step of the 2-C-methyl-d-erythritol 4-ph…	T
'16.1.2.1'	'secondary metabolism.isoprenoids.mevalonate pathway.acetyl-CoA C-acyltransferase'	'zm00001d031212'	'(at5g48230 : 570.0) acetoacetyl-CoA thiolase 2 (ACAT2); FUNCTIONS IN: transferase activity, transferring acyl groups other than amino-acyl groups, acetyl-CoA C-acetyltransferase activity, catalytic activity; INVOLVED IN: embryo development ending in seed dormancy; LOCATED IN: peroxisome, plasma membrane; EXPRESSED IN: 24 plant structures; EXPRESSED DURING: 13 growth stages; CONTAINS InterPro DOM…	T
'16.1.4.7'	'secondary metabolism.isoprenoids.carotenoids.carotenoid epsilon ring hydroxylase'	'zm00001d029822'	'(at3g53130 : 330.0) Lutein-deficient 1 (LUT1) required for lutein biosynthesis, member of the xanthophyll class of carotenoids. Involved in epsilon ring hydroxylation. Maps at 67.3 cM on chromosome 3.; LUTEIN DEFICIENT 1 (LUT1); FUNCTIONS IN: epsilon hydroxylase activity, oxygen binding; INVOLVED IN: carotenoid biosynthetic process; LOCATED IN: chloroplast, chloroplast envelope; EXPRESSED IN: 22…	T
'16.1.5'	'secondary metabolism.isoprenoids.terpenoids'	'zm00001d024211'	'(p93665|dcs1_goshi : 377.0) (+)-delta-cadinene synthase (EC 4.2.3.13) (D-cadinene synthase) - Gossypium hirsutum (Upland cotton) & (at1g70080 : 285.0) Terpenoid cyclases/Protein prenyltransferases superfamily protein; FUNCTIONS IN: lyase activity, magnesium ion binding; INVOLVED IN: metabolic process; EXPRESSED IN: root; CONTAINS InterPro DOMAIN/s: Terpene synthase, metal-binding domain (InterPr…	T
'16.1.5'	'secondary metabolism.isoprenoids.terpenoids'	'zm00001d024208'	'(p93665|dcs1_goshi : 373.0) (+)-delta-cadinene synthase (EC 4.2.3.13) (D-cadinene synthase) - Gossypium hirsutum (Upland cotton) & (at1g70080 : 282.0) Terpenoid cyclases/Protein prenyltransferases superfamily protein; FUNCTIONS IN: lyase activity, magnesium ion binding; INVOLVED IN: metabolic process; EXPRESSED IN: root; CONTAINS InterPro DOMAIN/s: Terpene synthase, metal-binding domain (InterPr…	T
'16.2'	'secondary metabolism.phenylpropanoids'	'zm00001d051015'	'(at2g22570 : 261.0) encodes a nicotinamidase that converts nicotinamide into nicotinic acid. As such the encoded enzyme is involved in the pyridine nucleotide salvage pathway which may be connected to the de novo NAD biosynthesis through the ABA signaling pathway.; nicotinamidase 1 (NIC1); CONTAINS InterPro DOMAIN/s: Isochorismatase-like (InterPro:IPR000868); Has 35333 Blast hits to 34131 protei…	T
'16.2'	'secondary metabolism.phenylpropanoids'	'zm00001d049179'	'(p47917|zrp4_maize : 195.0) O-methyltransferase ZRP4 (EC 2.1.1.-) (OMT) - Zea mays (Maize) & (at4g35160 : 106.0) O-methyltransferase family protein; FUNCTIONS IN: methyltransferase activity, O-methyltransferase activity, protein dimerization activity; LOCATED IN: cytosol; CONTAINS InterPro DOMAIN/s: Winged helix-turn-helix transcription repressor DNA-binding (InterPro:IPR011991), Plant methyltra…	T
'16.2'	'secondary metabolism.phenylpropanoids'	'zm00001d047192'	'(p47917|zrp4_maize : 351.0) O-methyltransferase ZRP4 (EC 2.1.1.-) (OMT) - Zea mays (Maize) & (at4g35160 : 162.0) O-methyltransferase family protein; FUNCTIONS IN: methyltransferase activity, O-methyltransferase activity, protein dimerization activity; LOCATED IN: cytosol; CONTAINS InterPro DOMAIN/s: Winged helix-turn-helix transcription repressor DNA-binding (InterPro:IPR011991), Plant methyltra…	T
'16.2'	'secondary metabolism.phenylpropanoids'	'zm00001d030090'	'(at2g23910 : 197.0) NAD(P)-binding Rossmann-fold superfamily protein; FUNCTIONS IN: coenzyme binding, binding, cinnamoyl-CoA reductase activity, catalytic activity; INVOLVED IN: lignin biosynthetic process, response to karrikin; LOCATED IN: cellular_component unknown; EXPRESSED IN: 19 plant structures; EXPRESSED DURING: 13 growth stages; CONTAINS InterPro DOMAIN/s: NAD-dependent epimerase/dehydr…	T
'16.2'	'secondary metabolism.phenylpropanoids'	'zm00001d029359'	'(p47917|zrp4_maize : 343.0) O-methyltransferase ZRP4 (EC 2.1.1.-) (OMT) - Zea mays (Maize) & (at4g35160 : 162.0) O-methyltransferase family protein; FUNCTIONS IN: methyltransferase activity, O-methyltransferase activity, protein dimerization activity; LOCATED IN: cytosol; CONTAINS InterPro DOMAIN/s: Winged helix-turn-helix transcription repressor DNA-binding (InterPro:IPR011991), Plant methyltra…	T
'16.2'	'secondary metabolism.phenylpropanoids'	'zm00001d012333'	'(at2g39980 : 397.0) HXXXD-type acyl-transferase family protein; FUNCTIONS IN: transferase activity, transferring acyl groups other than amino-acyl groups, transferase activity; INVOLVED IN: response to karrikin; LOCATED IN: cellular_component unknown; EXPRESSED IN: 17 plant structures; EXPRESSED DURING: 10 growth stages; CONTAINS InterPro DOMAIN/s: Transferase (InterPro:IPR003480); BEST Arabidop…	T
'16.2'	'secondary metabolism.phenylpropanoids'	'zm00001d007644'	'(at2g33590 : 140.0) NAD(P)-binding Rossmann-fold superfamily protein; FUNCTIONS IN: coenzyme binding, binding, cinnamoyl-CoA reductase activity, catalytic activity; INVOLVED IN: response to cadmium ion, lignin biosynthetic process; LOCATED IN: cellular_component unknown; EXPRESSED IN: 23 plant structures; EXPRESSED DURING: 13 growth stages; CONTAINS InterPro DOMAIN/s: NAD-dependent epimerase/deh…	T
'16.2.1'	'secondary metabolism.phenylpropanoids.lignin biosynthesis'	'zm00001d012335'	'(q8rxa5|czog2_maize : 808.0) Cis-zeatin O-glucosyltransferase 2 (EC 2.4.1.215) (cisZOG2) - Zea mays (Maize) & (at2g15490 : 157.0) UDP-glycosyltransferase 73B4 (UGT73B4); FUNCTIONS IN: quercetin 3-O-glucosyltransferase activity, UDP-glycosyltransferase activity, quercetin 7-O-glucosyltransferase activity, UDP-glucosyltransferase activity, transferase activity, transferring glycosyl groups; INVOLV…	T
'16.2.1.1'	'secondary metabolism.phenylpropanoids.lignin biosynthesis.PAL'	'zm00001d051166'	'(p53443|pal2_orysa : 1241.0) Phenylalanine ammonia-lyase (EC 4.3.1.5) - Oryza sativa (Rice) & (at2g37040 : 1009.0) Encodes PAL1, a phenylalanine ammonia-lyase. Arabidopsis has four PALs: AT2G37040 (PAL1), AT3G53260 (PAL2), AT5G04230 (PAL3) and AT3G10340 (PAL4).; PHE ammonia lyase 1 (PAL1); FUNCTIONS IN: phenylalanine ammonia-lyase activity; INVOLVED IN: in 10 processes; LOCATED IN: cytoplasm; EX…	T
'16.2.1.10'	'secondary metabolism.phenylpropanoids.lignin biosynthesis.CAD'	'zm00001d024314'	'(p93257|mtdh_mescr : 385.0) Probable mannitol dehydrogenase (EC 1.1.1.255) (NAD-dependent mannitol dehydrogenase) - Mesembryanthemum crystallinum (Common ice plant) & (at4g37990 : 379.0) Encodes an aromatic alcohol:NADP+ oxidoreductase whose mRNA levels are increased in response to treatment with a variety of phytopathogenic bacteria. Though similar to mannitol dehydrogenases, this enzyme does n…	T
'16.2.1.7'	'secondary metabolism.phenylpropanoids.lignin biosynthesis.CCR1'	'zm00001d030090'	'(at2g23910 : 197.0) NAD(P)-binding Rossmann-fold superfamily protein; FUNCTIONS IN: coenzyme binding, binding, cinnamoyl-CoA reductase activity, catalytic activity; INVOLVED IN: lignin biosynthetic process, response to karrikin; LOCATED IN: cellular_component unknown; EXPRESSED IN: 19 plant structures; EXPRESSED DURING: 13 growth stages; CONTAINS InterPro DOMAIN/s: NAD-dependent epimerase/dehydr…	T
'16.2.1.9'	'secondary metabolism.phenylpropanoids.lignin biosynthesis.COMT'	'zm00001d049541'	'(q06509|comt1_maize : 661.0) Caffeic acid 3-O-methyltransferase (EC 2.1.1.68) (S-adenosysl-L-methionine:caffeic acid 3-O-methyltransferase) (COMT) (CAOMT) - Zea mays (Maize) & (at5g54160 : 405.0) A caffeic acid/5-hydroxyferulic acid O-methyltransferase. Interacts with 14-4-3 proteins in yeast 2 hybrid assay. AtOMT1 (At5g54160) encodes a flavonol 3铆-O-methyltransferase that is highly active towar…	T
'16.2.1.9'	'secondary metabolism.phenylpropanoids.lignin biosynthesis.COMT'	'zm00001d048087'	'(q6zd89|omt1_orysa : 315.0) Quercetin 3-O-methyltransferase 1 precursor (EC 2.1.1.76) (Flavonol 3-O-methyltransferase 1) - Oryza sativa (Rice) & (at5g54160 : 268.0) A caffeic acid/5-hydroxyferulic acid O-methyltransferase. Interacts with 14-4-3 proteins in yeast 2 hybrid assay. AtOMT1 (At5g54160) encodes a flavonol 3铆-O-methyltransferase that is highly active towards quercetin and myricetin. The…	T
'16.4.1'	'secondary metabolism.N misc.alkaloid-like'	'zm00001d020306'	'(at3g57030 : 217.0) Calcium-dependent phosphotriesterase superfamily protein; FUNCTIONS IN: strictosidine synthase activity; INVOLVED IN: alkaloid biosynthetic process, biosynthetic process; LOCATED IN: endoplasmic reticulum, plasma membrane, plant-type cell wall; EXPRESSED IN: 24 plant structures; EXPRESSED DURING: 13 growth stages; CONTAINS InterPro DOMAIN/s: Strictosidine synthase, conserved …	T
'16.4.1'	'secondary metabolism.N misc.alkaloid-like'	'zm00001d007687'	'(at5g06060 : 226.0) NAD(P)-binding Rossmann-fold superfamily protein; FUNCTIONS IN: oxidoreductase activity, binding, catalytic activity; INVOLVED IN: oxidation reduction, metabolic process; EXPRESSED IN: 23 plant structures; EXPRESSED DURING: 14 growth stages; CONTAINS InterPro DOMAIN/s: Short-chain dehydrogenase/reductase, conserved site (InterPro:IPR020904), NAD(P)-binding domain (InterPro:IP…	T
'16.5.1.1.1.7'	'secondary metabolism.sulfur-containing.glucosinolates.synthesis.aliphatic.CYP83A1 phenylacetaldoxime monooxygenase'	'zm00001d014134'	'(o48923|c71da_soybn : 397.0) Cytochrome P450 71D10 (EC 1.14.-.-) - Glycine max (Soybean) & (at5g25180 : 341.0) putative cytochrome P450; "cytochrome P450, family 71, subfamily B, polypeptide 14" (CYP71B14); FUNCTIONS IN: electron carrier activity, monooxygenase activity, iron ion binding, oxygen binding, heme binding; INVOLVED IN: oxidation reduction; LOCATED IN: cellular_component unknown; EXPR…	T
'16.5.1.1.3.4'	'secondary metabolism.sulfur-containing.glucosinolates.synthesis.indole.cytochrome P450 monooxygenase'	'zm00001d034095'	'(at5g57220 : 133.0) member of CYP81F, involved in glucosinolate metabolism. Mutants had impaired resistance to fungi.; "cytochrome P450, family 81, subfamily F, polypeptide 2" (CYP81F2); FUNCTIONS IN: electron carrier activity, monooxygenase activity, iron ion binding, oxygen binding, heme binding; INVOLVED IN: in 7 processes; LOCATED IN: endomembrane system; EXPRESSED IN: 8 plant structures; EX…	T
'16.5.1.1.3.4'	'secondary metabolism.sulfur-containing.glucosinolates.synthesis.indole.cytochrome P450 monooxygenase'	'zm00001d013231'	'(at5g10600 : 143.0) member of CYP81K; "cytochrome P450, family 81, subfamily K, polypeptide 2" (CYP81K2); FUNCTIONS IN: electron carrier activity, monooxygenase activity, iron ion binding, oxygen binding, heme binding; INVOLVED IN: oxidation reduction; CONTAINS InterPro DOMAIN/s: Cytochrome P450 (InterPro:IPR001128), Cytochrome P450, E-class, group I (InterPro:IPR002401), Cytochrome P450, conser…	T
'16.5.1.1.4.1'	'secondary metabolism.sulfur-containing.glucosinolates.synthesis.shared.CYP83B1 phenylacetaldoxime monooxygenase'	'zm00001d014134'	'(o48923|c71da_soybn : 397.0) Cytochrome P450 71D10 (EC 1.14.-.-) - Glycine max (Soybean) & (at5g25180 : 341.0) putative cytochrome P450; "cytochrome P450, family 71, subfamily B, polypeptide 14" (CYP71B14); FUNCTIONS IN: electron carrier activity, monooxygenase activity, iron ion binding, oxygen binding, heme binding; INVOLVED IN: oxidation reduction; LOCATED IN: cellular_component unknown; EXPR…	T
'16.5.1.2.1'	'secondary metabolism.sulfur-containing.glucosinolates.regulation.aliphatic'	'zm00001d044975'	'(p10290|mybc_maize : 426.0) Anthocyanin regulatory C1 protein - Zea mays (Maize) & (at4g34990 : 176.0) Member of the R2R3 factor gene family.; myb domain protein 32 (MYB32); CONTAINS InterPro DOMAIN/s: SANT, DNA-binding (InterPro:IPR001005), Homeodomain-like (InterPro:IPR009057), Myb, DNA-binding (InterPro:IPR014778), HTH transcriptional regulator, Myb-type, DNA-binding (InterPro:IPR017930), Hom…	T
'16.5.1.2.3'	'secondary metabolism.sulfur-containing.glucosinolates.regulation.indole'	'zm00001d044975'	'(p10290|mybc_maize : 426.0) Anthocyanin regulatory C1 protein - Zea mays (Maize) & (at4g34990 : 176.0) Member of the R2R3 factor gene family.; myb domain protein 32 (MYB32); CONTAINS InterPro DOMAIN/s: SANT, DNA-binding (InterPro:IPR001005), Homeodomain-like (InterPro:IPR009057), Myb, DNA-binding (InterPro:IPR014778), HTH transcriptional regulator, Myb-type, DNA-binding (InterPro:IPR017930), Hom…	T
'16.5.1.3.1'	'secondary metabolism.sulfur-containing.glucosinolates.degradation.myrosinase'	'zm00001d024037'	'(p49235|bglc_maize : 1009.0) Beta-glucosidase, chloroplast precursor (EC 3.2.1.21) (Gentiobiase) (Cellobiase) (Beta-D-glucoside glucohydrolase) - Zea mays (Maize) & (at2g44450 : 483.0) beta glucosidase 15 (BGLU15); FUNCTIONS IN: cation binding, hydrolase activity, hydrolyzing O-glycosyl compounds, catalytic activity; INVOLVED IN: carbohydrate metabolic process; LOCATED IN: cell wall, plant-type …	T
'16.5.1.3.3'	'secondary metabolism.sulfur-containing.glucosinolates.degradation.nitrilase'	'zm00001d051214'	'(q42965|nrl4_tobac : 490.0) Nitrilase 4 (EC 3.5.5.1) - Nicotiana tabacum (Common tobacco) & (at5g22300 : 456.0) encodes a nitrilase isomer. The purified enzyme shows a strong substrate specificity for beta-cyano-L-alanine, a intermediate product of the cyanide detoxification pathway.; nitrilase 4 (NIT4); CONTAINS InterPro DOMAIN/s: Nitrilase/cyanide hydratase and apolipoprotein N-acyltransferase…	T
'16.5.99.1'	'secondary metabolism.sulfur-containing.misc.alliinase'	'zm00001d008700'	'(at4g24670 : 351.0) Encodes a protein with similarity to the TAA1 trytophan aminotransferase involved in IAA biosynthesis. Double mutant analyses suggest that this protein is involved in regulating many aspects of plant growth and development from embryogenesis to flower formation and plays a role in ethylene-mediated signaling.; tryptophan aminotransferase related 2 (TAR2); FUNCTIONS IN: L-tryp…	T
'16.8.1'	'secondary metabolism.flavonoids.anthocyanins'	'zm00001d042740'	'(at2g22590 : 324.0) UDP-Glycosyltransferase superfamily protein; FUNCTIONS IN: transferase activity, transferring glycosyl groups; INVOLVED IN: metabolic process; LOCATED IN: cellular_component unknown; CONTAINS InterPro DOMAIN/s: UDP-glucuronosyl/UDP-glucosyltransferase (InterPro:IPR002213); BEST Arabidopsis thaliana protein match is: UDP-Glycosyltransferase superfamily protein (TAIR:AT5G65550.…	T
'16.8.1'	'secondary metabolism.flavonoids.anthocyanins'	'zm00001d012333'	'(at2g39980 : 397.0) HXXXD-type acyl-transferase family protein; FUNCTIONS IN: transferase activity, transferring acyl groups other than amino-acyl groups, transferase activity; INVOLVED IN: response to karrikin; LOCATED IN: cellular_component unknown; EXPRESSED IN: 17 plant structures; EXPRESSED DURING: 10 growth stages; CONTAINS InterPro DOMAIN/s: Transferase (InterPro:IPR003480); BEST Arabidop…	T
'16.8.1.12'	'secondary metabolism.flavonoids.anthocyanins.anthocyanidin 3-O-glucosyltransferase'	'zm00001d042740'	'(at2g22590 : 324.0) UDP-Glycosyltransferase superfamily protein; FUNCTIONS IN: transferase activity, transferring glycosyl groups; INVOLVED IN: metabolic process; LOCATED IN: cellular_component unknown; CONTAINS InterPro DOMAIN/s: UDP-glucuronosyl/UDP-glucosyltransferase (InterPro:IPR002213); BEST Arabidopsis thaliana protein match is: UDP-Glycosyltransferase superfamily protein (TAIR:AT5G65550.…	T
'16.8.1.12'	'secondary metabolism.flavonoids.anthocyanins.anthocyanidin 3-O-glucosyltransferase'	'zm00001d033320'	'(at5g49690 : 246.0) UDP-Glycosyltransferase superfamily protein; FUNCTIONS IN: transferase activity, transferring glycosyl groups; INVOLVED IN: metabolic process; CONTAINS InterPro DOMAIN/s: UDP-glucuronosyl/UDP-glucosyltransferase (InterPro:IPR002213); BEST Arabidopsis thaliana protein match is: UDP-Glycosyltransferase superfamily protein (TAIR:AT5G65550.1); Has 1807 Blast hits to 1807 proteins…	T
'16.8.2'	'secondary metabolism.flavonoids.chalcones'	'zm00001d025533'	'(q7g764|nado1_orysa : 315.0) Probable NAD(P)H-dependent oxidoreductase 1 (EC 1.1.1.-) - Oryza sativa (Rice) & (at1g59950 : 292.0) NAD(P)-linked oxidoreductase superfamily protein; FUNCTIONS IN: oxidoreductase activity; INVOLVED IN: oxidation reduction; CONTAINS InterPro DOMAIN/s: Aldo/keto reductase (InterPro:IPR001395), Aldo/keto reductase subgroup (InterPro:IPR020471), Aldo/keto reductase, con…	T
'16.8.2'	'secondary metabolism.flavonoids.chalcones'	'zm00001d003524'	'(q7g764|nado1_orysa : 332.0) Probable NAD(P)H-dependent oxidoreductase 1 (EC 1.1.1.-) - Oryza sativa (Rice) & (at1g59960 : 316.0) NAD(P)-linked oxidoreductase superfamily protein; FUNCTIONS IN: oxidoreductase activity; INVOLVED IN: response to salt stress; EXPRESSED IN: 21 plant structures; EXPRESSED DURING: 13 growth stages; CONTAINS InterPro DOMAIN/s: Aldo/keto reductase (InterPro:IPR001395), …	T
'16.8.2.2'	'secondary metabolism.flavonoids.chalcones.chalcone isomerase'	'zm00001d012972'	'(q08704|cfi_maize : 231.0) Chalcone--flavonone isomerase (EC 5.5.1.6) (Chalcone isomerase) - Zea mays (Maize) & (at3g55120 : 166.0) Catalyzes the conversion of chalcones into flavanones. Required for the accumulation of purple anthocyanins in leaves and stems.; TRANSPARENT TESTA 5 (TT5); FUNCTIONS IN: chalcone isomerase activity; INVOLVED IN: response to UV, response to UV-B, response to karriki…	T
'16.8.3'	'secondary metabolism.flavonoids.dihydroflavonols'	'zm00001d053514'	'(at4g01070 : 359.0) the glycosyltransferase (UGT72B1) is involved in metabolizing xenobiotica (chloroaniline and chlorophenole). Comparison between wild type and knock-out mutant demonstrates the central role of this gene for metabolizing chloroaniline but significantly less for chlorophenole. The glucosyltransferase preferred UDP-xylose over UDP-glucose indicating its (additional) functioning a…	T
'16.8.3'	'secondary metabolism.flavonoids.dihydroflavonols'	'zm00001d012335'	'(q8rxa5|czog2_maize : 808.0) Cis-zeatin O-glucosyltransferase 2 (EC 2.4.1.215) (cisZOG2) - Zea mays (Maize) & (at2g15490 : 157.0) UDP-glycosyltransferase 73B4 (UGT73B4); FUNCTIONS IN: quercetin 3-O-glucosyltransferase activity, UDP-glycosyltransferase activity, quercetin 7-O-glucosyltransferase activity, UDP-glucosyltransferase activity, transferase activity, transferring glycosyl groups; INVOLV…	T
'16.8.3'	'secondary metabolism.flavonoids.dihydroflavonols'	'zm00001d007869'	'(at1g07250 : 189.0) UDP-glucosyl transferase 71C4 (UGT71C4); FUNCTIONS IN: quercetin 3-O-glucosyltransferase activity, quercetin 7-O-glucosyltransferase activity, UDP-glucosyltransferase activity, transferase activity, transferring glycosyl groups; INVOLVED IN: metabolic process; LOCATED IN: cellular_component unknown; EXPRESSED IN: 22 plant structures; EXPRESSED DURING: 13 growth stages; CONTAI…	T
'16.8.3'	'secondary metabolism.flavonoids.dihydroflavonols'	'zm00001d007486'	'(at1g01420 : 379.0) UDP-glucosyl transferase 72B3 (UGT72B3); FUNCTIONS IN: quercetin 3-O-glucosyltransferase activity, UDP-glycosyltransferase activity, transferase activity, transferring glycosyl groups; INVOLVED IN: metabolic process; LOCATED IN: cellular_component unknown; EXPRESSED IN: 11 plant structures; EXPRESSED DURING: LP.04 four leaves visible, petal differentiation and expansion stage…	T
'16.8.3.2'	'secondary metabolism.flavonoids.dihydroflavonols.flavanone 3-hydroxylase'	'zm00001d001960'	'(p28038|fl3h_horvu : 570.0) Naringenin,2-oxoglutarate 3-dioxygenase (EC 1.14.11.9) (Flavonone-3-hydroxylase) (F3H) (FHT) - Hordeum vulgare (Barley) & (at3g51240 : 541.0) Encodes flavanone 3-hydroxylase that is coordinately expressed with chalcone synthase and chalcone isomerases. Regulates flavonoid biosynthesis.; flavanone 3-hydroxylase (F3H); CONTAINS InterPro DOMAIN/s: Oxoglutarate/iron-depen…	T
'16.8.4'	'secondary metabolism.flavonoids.flavonols'	'zm00001d016435'	'(at3g53150 : 179.0) UDP-glucosyl transferase 73D1 (UGT73D1); FUNCTIONS IN: transferase activity, transferring hexosyl groups, UDP-glycosyltransferase activity; INVOLVED IN: metabolic process; LOCATED IN: endomembrane system; EXPRESSED IN: stem, sepal, stamen; EXPRESSED DURING: 4 anthesis; CONTAINS InterPro DOMAIN/s: UDP-glucuronosyl/UDP-glucosyltransferase (InterPro:IPR002213); BEST Arabidopsis …	T
'16.8.4'	'secondary metabolism.flavonoids.flavonols'	'zm00001d016429'	'(at2g36780 : 129.0) UDP-Glycosyltransferase superfamily protein; FUNCTIONS IN: UDP-glycosyltransferase activity, transferase activity, transferring glycosyl groups; INVOLVED IN: metabolic process; LOCATED IN: cellular_component unknown; CONTAINS InterPro DOMAIN/s: UDP-glucuronosyl/UDP-glucosyltransferase (InterPro:IPR002213); BEST Arabidopsis thaliana protein match is: UDP-Glycosyltransferase su…	T
'16.8.4'	'secondary metabolism.flavonoids.flavonols'	'zm00001d016424'	'(at2g36790 : 87.0) The At2g36790 gene encodes a UDP-glucose:flavonol-3-O-glycoside-7-O-glucosyltransferase (UGT73C6)attaching a glucosyl residue to the 7-O-position of the flavonols kaempferol, quercetin and their 3-O-glycoside derivatives.; UDP-glucosyl transferase 73C6 (UGT73C6); CONTAINS InterPro DOMAIN/s: UDP-glucuronosyl/UDP-glucosyltransferase (InterPro:IPR002213); BEST Arabidopsis thalian…	T
'16.8.4'	'secondary metabolism.flavonoids.flavonols'	'zm00001d016417'	'(at2g36780 : 177.0) UDP-Glycosyltransferase superfamily protein; FUNCTIONS IN: UDP-glycosyltransferase activity, transferase activity, transferring glycosyl groups; INVOLVED IN: metabolic process; LOCATED IN: cellular_component unknown; CONTAINS InterPro DOMAIN/s: UDP-glucuronosyl/UDP-glucosyltransferase (InterPro:IPR002213); BEST Arabidopsis thaliana protein match is: UDP-Glycosyltransferase su…	T
'16.8.4'	'secondary metabolism.flavonoids.flavonols'	'zm00001d012335'	'(q8rxa5|czog2_maize : 808.0) Cis-zeatin O-glucosyltransferase 2 (EC 2.4.1.215) (cisZOG2) - Zea mays (Maize) & (at2g15490 : 157.0) UDP-glycosyltransferase 73B4 (UGT73B4); FUNCTIONS IN: quercetin 3-O-glucosyltransferase activity, UDP-glycosyltransferase activity, quercetin 7-O-glucosyltransferase activity, UDP-glucosyltransferase activity, transferase activity, transferring glycosyl groups; INVOLV…	T
'16.8.4.1'	'secondary metabolism.flavonoids.flavonols.flavonol synthase (FLS)'	'zm00001d018181'	'(q07512|fls_pethy : 327.0) Flavonol synthase/flavanone 3-hydroxylase (EC 1.14.11.23) (EC 1.14.11.9) (FLS) - Petunia hybrida (Petunia) & (at5g08640 : 311.0) Encodes a flavonol synthase that catalyzes formation of flavonols from dihydroflavonols.; flavonol synthase 1 (FLS1); CONTAINS InterPro DOMAIN/s: Oxoglutarate/iron-dependent oxygenase (InterPro:IPR005123); BEST Arabidopsis thaliana protein ma…	T
'16.8.4.2'	'secondary metabolism.flavonoids.flavonols.flavonol 3-O-glycosyltransferase'	'zm00001d016435'	'(at3g53150 : 179.0) UDP-glucosyl transferase 73D1 (UGT73D1); FUNCTIONS IN: transferase activity, transferring hexosyl groups, UDP-glycosyltransferase activity; INVOLVED IN: metabolic process; LOCATED IN: endomembrane system; EXPRESSED IN: stem, sepal, stamen; EXPRESSED DURING: 4 anthesis; CONTAINS InterPro DOMAIN/s: UDP-glucuronosyl/UDP-glucosyltransferase (InterPro:IPR002213); BEST Arabidopsis …	T
'16.8.4.2'	'secondary metabolism.flavonoids.flavonols.flavonol 3-O-glycosyltransferase'	'zm00001d012335'	'(q8rxa5|czog2_maize : 808.0) Cis-zeatin O-glucosyltransferase 2 (EC 2.4.1.215) (cisZOG2) - Zea mays (Maize) & (at2g15490 : 157.0) UDP-glycosyltransferase 73B4 (UGT73B4); FUNCTIONS IN: quercetin 3-O-glucosyltransferase activity, UDP-glycosyltransferase activity, quercetin 7-O-glucosyltransferase activity, UDP-glucosyltransferase activity, transferase activity, transferring glycosyl groups; INVOLV…	T
'16.8.5.1'	'secondary metabolism.flavonoids.isoflavones.isoflavone reductase'	'novel01082'	'(at4g34540 : 81.6) encodes a protein whose sequence is similar to pinoresinol-lariciresinol reductase from pine.; NmrA-like negative transcriptional regulator family protein; FUNCTIONS IN: pinoresinol reductase activity; INVOLVED IN: metabolic process; LOCATED IN: cellular_component unknown; EXPRESSED IN: 23 plant structures; EXPRESSED DURING: 13 growth stages; CONTAINS InterPro DOMAIN/s: NAD(P)…	T
'17.1.1'	'hormone metabolism.abscisic acid.synthesis-degradation'	'zm00001d047710'	'(q852m2|aldo3_orysa : 291.0) Probable aldehyde oxidase 3 (EC 1.2.3.1) (AO-3) - Oryza sativa (Rice) & (at5g20960 : 163.0) Encodes aldehyde oxidase AA01.; aldehyde oxidase 1 (AAO1); CONTAINS InterPro DOMAIN/s: Aldehyde oxidase/xanthine dehydrogenase (InterPro:IPR016208), Ferredoxin (InterPro:IPR001041), Molybdopterin dehydrogenase, FAD-binding (InterPro:IPR002346), Beta-grasp fold, ferredoxin-type…	T
'17.1.1.1.1'	'hormone metabolism.abscisic acid.synthesis-degradation.synthesis.zeaxanthin epoxidase'	'zm00001d025545'	'(q40412|aba2_nicpl : 797.0) Zeaxanthin epoxidase, chloroplast precursor (EC 1.14.13.90) - Nicotiana plumbaginifolia (Leadwort-leaved tobacco) & (at5g67030 : 791.0) Encodes a single copy zeaxanthin epoxidase gene that functions in first step of the biosynthesis of the abiotic stress hormone abscisic acid (ABA). Mutants in this gene are unable to express female sterility in response to beta-aminob…	T
'17.1.1.1.12'	'hormone metabolism.abscisic acid.synthesis-degradation.synthesis.abscisic aldehyde oxidase'	'zm00001d047710'	'(q852m2|aldo3_orysa : 291.0) Probable aldehyde oxidase 3 (EC 1.2.3.1) (AO-3) - Oryza sativa (Rice) & (at5g20960 : 163.0) Encodes aldehyde oxidase AA01.; aldehyde oxidase 1 (AAO1); CONTAINS InterPro DOMAIN/s: Aldehyde oxidase/xanthine dehydrogenase (InterPro:IPR016208), Ferredoxin (InterPro:IPR001041), Molybdopterin dehydrogenase, FAD-binding (InterPro:IPR002346), Beta-grasp fold, ferredoxin-type…	T
'17.1.1.2.1'	'hormone metabolism.abscisic acid.synthesis-degradation.degradation.8-hydroxylase'	'zm00001d020717'	'(at3g19270 : 555.0) Encodes a protein with ABA 8'-hydroxylase activity, involved in ABA catabolism. Member of the CYP707A gene family.; "cytochrome P450, family 707, subfamily A, polypeptide 4" (CYP707A4); CONTAINS InterPro DOMAIN/s: Cytochrome P450 (InterPro:IPR001128), Cytochrome P450, E-class, group I (InterPro:IPR002401), Cytochrome P450, conserved site (InterPro:IPR017972); BEST Arabidopsis…	T
'17.1.2'	'hormone metabolism.abscisic acid.signal transduction'	'zm00001d020711'	'(at2g36270 : 133.0) Encodes a member of the basic leucine zipper transcription factor family, involved in ABA signalling during seed maturation and germination. The Arabidopsis abscisic acid (ABA)-insensitive abi5 mutants have pleiotropic defects in ABA response, including decreased sensitivity to ABA inhibition of germination and altered expression of some ABA-regulated genes. Comparison of see…	T
'17.1.2'	'hormone metabolism.abscisic acid.signal transduction'	'zm00001d013595'	'(at3g63210 : 94.7) encodes a novel zinc-finger protein with a proline-rich N-terminus, identical to senescence-associated protein SAG102; Protein of unknown function (DUF581); CONTAINS InterPro DOMAIN/s: Protein of unknown function DUF581 (InterPro:IPR007650); BEST Arabidopsis thaliana protein match is: Protein of unknown function (DUF581) (TAIR:AT3G22550.1); Has 30201 Blast hits to 17322 protei…	T
'17.1.2'	'hormone metabolism.abscisic acid.signal transduction'	'zm00001d001838'	'(at3g24650 : 135.0) Homologous to the maize transcription factor Viviparous-1. Full length ABI3 protein binds to the highly conserved RY motif [DNA motif CATGCA(TG)], present in many seed-specific promoters, and the B3 domains of this transcription factor is necessary for the specific interaction with the RY element. Transcriptional activity of ABI3 requires the B3 DNA-binding domain and an acti…	T
'17.1.3'	'hormone metabolism.abscisic acid.induced-regulated-responsive-activated'	'zm00001d020711'	'(at2g36270 : 133.0) Encodes a member of the basic leucine zipper transcription factor family, involved in ABA signalling during seed maturation and germination. The Arabidopsis abscisic acid (ABA)-insensitive abi5 mutants have pleiotropic defects in ABA response, including decreased sensitivity to ABA inhibition of germination and altered expression of some ABA-regulated genes. Comparison of see…	T
'17.2.2'	'hormone metabolism.auxin.signal transduction'	'zm00001d042345'	'(q5jlm1|pin6_orysa : 555.0) Probable auxin efflux carrier component 6 (OsPIN6) - Oryza sativa (Rice) & (at5g16530 : 399.0) Encodes PIN5, an atypical member of the PIN family. PIN5 is a functional auxin transporter that is required for auxin-mediated development. PIN5 does not have a direct role in cell-to-cell transport but regulates intracellular auxin homeostasis and metabolism. PIN5 localizes…	T
'17.2.3'	'hormone metabolism.auxin.induced-regulated-responsive-activated'	'zm00001d031555'	'(at5g35735 : 303.0) Auxin-responsive family protein; LOCATED IN: plasma membrane, membrane; EXPRESSED IN: 21 plant structures; EXPRESSED DURING: 12 growth stages; CONTAINS InterPro DOMAIN/s: Cytochrome b561, eukaryote (InterPro:IPR004877), Uncharacterised conserved protein UCP037471 (InterPro:IPR017214), Protein of unknown function DUF568, DOMON-like (InterPro:IPR007613), DOMON related (InterPro…	T
'17.2.3'	'hormone metabolism.auxin.induced-regulated-responsive-activated'	'novel01854'	'(at5g15740 : 117.0) O-fucosyltransferase family protein; CONTAINS InterPro DOMAIN/s: GDP-fucose protein O-fucosyltransferase (InterPro:IPR019378); BEST Arabidopsis thaliana protein match is: O-fucosyltransferase family protein (TAIR:AT3G02250.1); Has 822 Blast hits to 815 proteins in 30 species: Archae - 0; Bacteria - 0; Metazoa - 0; Fungi - 0; Plants - 822; Viruses - 0; Other Eukaryotes - 0 (so…	T
'17.3.1.2.2'	'hormone metabolism.brassinosteroid.synthesis-degradation.sterols.SMT2'	'zm00001d013035'	'(q6zix2|smt1_orysa : 250.0) Cycloartenol-C-24-methyltransferase 1 (EC 2.1.1.41) (24-sterol C-methyltransferase 1) (Sterol C-methyltransferase 1) - Oryza sativa (Rice) & (at5g13710 : 242.0) SMT1 controls the level of cholesterol in plants; sterol methyltransferase 1 (SMT1); CONTAINS InterPro DOMAIN/s: Sterol methyltransferase C-terminal (InterPro:IPR013705), Methyltransferase type 11 (InterPro:IP…	T
'17.3.1.2.3'	'hormone metabolism.brassinosteroid.synthesis-degradation.sterols.CYP51'	'zm00001d044120'	'(p93846|cp51_sorbi : 437.0) Cytochrome P450 51 (EC 1.14.13.70) (CYPLI) (P450-LIA1) (Obtusifoliol 14-alpha demethylase) - Sorghum bicolor (Sorghum) (Sorghum vulgare) & (at1g11680 : 426.0) putative obtusifoliol 14-alpha demethylase involved in sterol biosynthesis.; CYTOCHROME P450 51G1 (CYP51G1); FUNCTIONS IN: sterol 14-demethylase activity, oxygen binding; INVOLVED IN: sterol biosynthetic process…	T
'17.4.1'	'hormone metabolism.cytokinin.synthesis-degradation'	'zm00001d032222'	'(at1g22360 : 535.0) UDP-glucosyl transferase 85A2 (UGT85A2); FUNCTIONS IN: UDP-glycosyltransferase activity, transferase activity, transferring glycosyl groups, glucuronosyltransferase activity; INVOLVED IN: metabolic process; LOCATED IN: cellular_component unknown; EXPRESSED IN: 21 plant structures; EXPRESSED DURING: 11 growth stages; CONTAINS InterPro DOMAIN/s: UDP-glucuronosyl/UDP-glucosyltra…	T
'17.4.1'	'hormone metabolism.cytokinin.synthesis-degradation'	'zm00001d032046'	'(at5g21482 : 485.0) This gene used to be called AtCKX5. It encodes a protein whose sequence is similar to cytokinin oxidase/dehydrogenase, which catalyzes the degradation of cytokinins.; cytokinin oxidase 7 (CKX7); CONTAINS InterPro DOMAIN/s: Cytokinin dehydrogenase 1, FAD/cytokinin binding domain (InterPro:IPR015345), FAD-binding, type 2 (InterPro:IPR016166), FAD-linked oxidase-like, C-terminal…	T
'17.4.1'	'hormone metabolism.cytokinin.synthesis-degradation'	'zm00001d024476'	'(at1g22370 : 267.0) UDP-glucosyl transferase 85A5 (UGT85A5); FUNCTIONS IN: transferase activity, transferring glycosyl groups, glucuronosyltransferase activity; INVOLVED IN: metabolic process; EXPRESSED IN: 15 plant structures; EXPRESSED DURING: 9 growth stages; CONTAINS InterPro DOMAIN/s: UDP-glucuronosyl/UDP-glucosyltransferase (InterPro:IPR002213); BEST Arabidopsis thaliana protein match is: …	T
'17.4.1'	'hormone metabolism.cytokinin.synthesis-degradation'	'zm00001d016896'	'(at1g22400 : 406.0) UGT85A1; FUNCTIONS IN: in 6 functions; INVOLVED IN: metabolic process; LOCATED IN: cellular_component unknown; EXPRESSED IN: 22 plant structures; EXPRESSED DURING: 10 growth stages; CONTAINS InterPro DOMAIN/s: UDP-glucuronosyl/UDP-glucosyltransferase (InterPro:IPR002213); BEST Arabidopsis thaliana protein match is: UDP-glucosyl transferase 85A3 (TAIR:AT1G22380.1); Has 7940 Bl…	T
'17.4.1'	'hormone metabolism.cytokinin.synthesis-degradation'	'zm00001d016435'	'(at3g53150 : 179.0) UDP-glucosyl transferase 73D1 (UGT73D1); FUNCTIONS IN: transferase activity, transferring hexosyl groups, UDP-glycosyltransferase activity; INVOLVED IN: metabolic process; LOCATED IN: endomembrane system; EXPRESSED IN: stem, sepal, stamen; EXPRESSED DURING: 4 anthesis; CONTAINS InterPro DOMAIN/s: UDP-glucuronosyl/UDP-glucosyltransferase (InterPro:IPR002213); BEST Arabidopsis …	T
'17.4.1'	'hormone metabolism.cytokinin.synthesis-degradation'	'zm00001d016429'	'(at2g36780 : 129.0) UDP-Glycosyltransferase superfamily protein; FUNCTIONS IN: UDP-glycosyltransferase activity, transferase activity, transferring glycosyl groups; INVOLVED IN: metabolic process; LOCATED IN: cellular_component unknown; CONTAINS InterPro DOMAIN/s: UDP-glucuronosyl/UDP-glucosyltransferase (InterPro:IPR002213); BEST Arabidopsis thaliana protein match is: UDP-Glycosyltransferase su…	T
'17.4.1'	'hormone metabolism.cytokinin.synthesis-degradation'	'zm00001d016417'	'(at2g36780 : 177.0) UDP-Glycosyltransferase superfamily protein; FUNCTIONS IN: UDP-glycosyltransferase activity, transferase activity, transferring glycosyl groups; INVOLVED IN: metabolic process; LOCATED IN: cellular_component unknown; CONTAINS InterPro DOMAIN/s: UDP-glucuronosyl/UDP-glucosyltransferase (InterPro:IPR002213); BEST Arabidopsis thaliana protein match is: UDP-Glycosyltransferase su…	T
'17.5.1.1'	'hormone metabolism.ethylene.synthesis-degradation.1-aminocyclopropane-1-carboxylate synthase'	'zm00001d039487'	'(at4g26200 : 587.0) Member of a family of proteins in Arabidopsis that encode 1-Amino-cyclopropane-1-carboxylate synthase, an enzyme involved in ethylene biosynthesis. Not expressed in response to IAA.; 1-amino-cyclopropane-1-carboxylate synthase 7 (ACS7); CONTAINS InterPro DOMAIN/s: 1-aminocyclopropane-1-carboxylate synthase (InterPro:IPR001176), Pyridoxal phosphate-dependent transferase, major…	T
'17.5.1.1'	'hormone metabolism.ethylene.synthesis-degradation.1-aminocyclopropane-1-carboxylate synthase'	'zm00001d026060'	'(p31531|1a1c_soybn : 595.0) 1-aminocyclopropane-1-carboxylate synthase (EC 4.4.1.14) (ACC synthase) (S-adenosyl-L-methionine methylthioadenosine-lyase) - Glycine max (Soybean) & (at4g11280 : 570.0) encodes a a member of the 1-aminocyclopropane-1-carboxylate (ACC) synthase (S-adenosyl-L-methionine methylthioadenosine-lyase, EC 4.4.1.14) gene family; 1-aminocyclopropane-1-carboxylic acid (acc) syn…	T
'17.5.1.2'	'hormone metabolism.ethylene.synthesis-degradation.1-aminocyclopropane-1-carboxylate oxidase'	'zm00001d052136'	'(q40634|acco1_orysa : 456.0) 1-aminocyclopropane-1-carboxylate oxidase 1 (EC 1.14.17.4) (ACC oxidase 1) (Ethylene-forming enzyme) (EFE) - Oryza sativa (Rice) & (at1g05010 : 416.0) Encodes 1-aminocyclopropane-1-carboxylate oxidase; ethylene-forming enzyme (EFE); FUNCTIONS IN: 1-aminocyclopropane-1-carboxylate oxidase activity; INVOLVED IN: response to fungus, ethylene biosynthetic process; EXPRES…	T
'17.5.1.2'	'hormone metabolism.ethylene.synthesis-degradation.1-aminocyclopropane-1-carboxylate oxidase'	'zm00001d024843'	'(at1g77330 : 395.0) similar to 1-aminocyclopropane-1-carboxylate oxidase GI:3386565 from (Sorghum bicolor); 2-oxoglutarate (2OG) and Fe(II)-dependent oxygenase superfamily protein; CONTAINS InterPro DOMAIN/s: Oxoglutarate/iron-dependent oxygenase (InterPro:IPR005123); BEST Arabidopsis thaliana protein match is: ACC oxidase 2 (TAIR:AT1G62380.1); Has 8581 Blast hits to 8541 proteins in 996 species…	T
'17.5.2'	'hormone metabolism.ethylene.signal transduction'	'zm00001d034920'	'(at3g23240 : 114.0) encodes a member of the ERF (ethylene response factor) subfamily B-3 of ERF/AP2 transcription factor family (ERF1). The protein contains one AP2 domain. There are 18 members in this subfamily including ATERF-1, ATERF-2, AND ATERF-5. EREBP like protein that binds GCC box of ethylene regulated promoters such as basic chitinases. Constitutive expression of ERF1 phenocopies ethyl…	T
'17.5.2'	'hormone metabolism.ethylene.signal transduction'	'zm00001d029940'	'(q40478|erf5_tobac : 86.7) Ethylene-responsive transcription factor 5 (Ethylene-responsive element-binding factor 5 homolog) (EREBP-4) (NtERF4) - Nicotiana tabacum (Common tobacco) & (at5g51190 : 83.6) encodes a member of the ERF (ethylene response factor) subfamily B-3 of ERF/AP2 transcription factor family. The protein contains one AP2 domain. There are 18 members in this subfamily including A…	T
'17.5.2'	'hormone metabolism.ethylene.signal transduction'	'zm00001d019734'	'(at1g06160 : 112.0) encodes a member of the ERF (ethylene response factor) subfamily B-3 of ERF/AP2 transcription factor family. The protein contains one AP2 domain. There are 18 members in this subfamily including ATERF-1, ATERF-2, AND ATERF-5.; octadecanoid-responsive Arabidopsis AP2/ERF 59 (ORA59); CONTAINS InterPro DOMAIN/s: DNA-binding, integrase-type (InterPro:IPR016177), Pathogenesis-rela…	T
'17.5.2'	'hormone metabolism.ethylene.signal transduction'	'zm00001d017462'	'(q9lw50|erf2_nicsy : 131.0) Ethylene-responsive transcription factor 2 (Ethylene-responsive element-binding factor 2) (EREBP-2) (NsERF2) - Nicotiana sylvestris (Wood tobacco) & (at4g17500 : 129.0) Encodes a member of the ERF (ethylene response factor) subfamily B-3 of ERF/AP2 transcription factor family (ATERF-1). The protein contains one AP2 domain. There are 18 members in this subfamily includ…	T
'17.6.1.1'	'hormone metabolism.gibberelin.synthesis-degradation.copalyl diphosphate synthase'	'zm00001d029648'	'(at4g02780 : 649.0) Catalyzes the conversion of geranylgeranyl pyrophosphate (GGPP) to copalyl pyrophosphate (CPP) of gibberellin biosynthesis; GA REQUIRING 1 (GA1); CONTAINS InterPro DOMAIN/s: Terpene synthase, metal-binding domain (InterPro:IPR005630), Terpenoid synthase (InterPro:IPR008949), Terpenoid cylases/protein prenyltransferase alpha-alpha toroid (InterPro:IPR008930), Terpene synthase-…	T
'17.6.1.2'	'hormone metabolism.gibberelin.synthesis-degradation.ent-kaurene synthase'	'zm00001d041082'	'(at1g79460 : 585.0) Encodes for a protein with ent-kaurene synthase B activity which catalyzes the second step in the cyclization of GGPP to ent-kaurene in the gibberellins biosynthetic pathway.; GA REQUIRING 2 (GA2); FUNCTIONS IN: ent-kaurene synthase activity; INVOLVED IN: gibberellin biosynthetic process, gibberellic acid mediated signaling pathway; LOCATED IN: chloroplast stroma, chloroplast…	T
'17.6.1.3'	'hormone metabolism.gibberelin.synthesis-degradation.ent-kaurene oxidase'	'zm00001d046342'	'(at5g25900 : 486.0) Encodes a member of the CYP701A cytochrome p450 family that is involved in later steps of the gibberellin biosynthetic pathway.; GA requiring 3 (GA3); FUNCTIONS IN: oxygen binding; INVOLVED IN: gibberellin biosynthetic process, gibberellic acid mediated signaling pathway, ent-kaurene oxidation to kaurenoic acid; LOCATED IN: chloroplast outer membrane, endoplasmic reticulum, m…	T
'17.6.2'	'hormone metabolism.gibberelin.signal transduction'	'zm00001d044734'	'(at5g37490 : 155.0) ARM repeat superfamily protein; FUNCTIONS IN: ubiquitin-protein ligase activity, binding; INVOLVED IN: response to chitin; LOCATED IN: ubiquitin ligase complex; EXPRESSED IN: 14 plant structures; EXPRESSED DURING: 7 growth stages; CONTAINS InterPro DOMAIN/s: U box domain (InterPro:IPR003613), Armadillo-like helical (InterPro:IPR011989), Armadillo-type fold (InterPro:IPR016024…	T
'17.7.1.10'	'hormone metabolism.jasmonate.synthesis-degradation.jasmonate-O-methyltransferase'	'zm00001d044765'	'(at5g04370 : 252.0) A member of the Arabidopsis SABATH methyltransferase gene family. Encodes NAMT1, a methyltransferase that methylates nicotinic acid.; NAMT1; CONTAINS InterPro DOMAIN/s: SAM dependent carboxyl methyltransferase (InterPro:IPR005299); BEST Arabidopsis thaliana protein match is: S-adenosyl-L-methionine-dependent methyltransferases superfamily protein (TAIR:AT3G11480.1); Has 935 B…	T
'17.7.1.10'	'hormone metabolism.jasmonate.synthesis-degradation.jasmonate-O-methyltransferase'	'zm00001d043734'	'(at4g36470 : 306.0) S-adenosyl-L-methionine-dependent methyltransferases superfamily protein; CONTAINS InterPro DOMAIN/s: SAM dependent carboxyl methyltransferase (InterPro:IPR005299); BEST Arabidopsis thaliana protein match is: S-adenosyl-L-methionine-dependent methyltransferases superfamily protein (TAIR:AT3G11480.1); Has 909 Blast hits to 891 proteins in 125 species: Archae - 0; Bacteria - 69…	T
'17.7.1.2'	'hormone metabolism.jasmonate.synthesis-degradation.lipoxygenase'	'zm00001d033623'	'(q7g794|lox3_orysa : 1394.0) Putative lipoxygenase 3 (EC 1.13.11.12) - Oryza sativa (Rice) & (at3g22400 : 933.0) LOX5; FUNCTIONS IN: oxidoreductase activity, acting on single donors with incorporation of molecular oxygen, incorporation of two atoms of oxygen, lipoxygenase activity, iron ion binding, metal ion binding; INVOLVED IN: root development; LOCATED IN: chloroplast; EXPRESSED IN: 22 plant…	T
'17.7.1.2'	'hormone metabolism.jasmonate.synthesis-degradation.lipoxygenase'	'zm00001d031449'	'(q84yk8|loxc2_orysa : 1355.0) Probable lipoxygenase 8, chloroplast precursor (EC 1.13.11.12) - Oryza sativa (Rice) & (at3g45140 : 892.0) Chloroplast lipoxygenase required for wound-induced jasmonic acid accumulation in Arabidopsis.Mutants are resistant to Staphylococcus aureus and accumulate salicylic acid upon infection.; lipoxygenase 2 (LOX2); FUNCTIONS IN: lipoxygenase activity; INVOLVED IN: …	T
'17.8.1'	'hormone metabolism.salicylic acid.synthesis-degradation'	'zm00001d044765'	'(at5g04370 : 252.0) A member of the Arabidopsis SABATH methyltransferase gene family. Encodes NAMT1, a methyltransferase that methylates nicotinic acid.; NAMT1; CONTAINS InterPro DOMAIN/s: SAM dependent carboxyl methyltransferase (InterPro:IPR005299); BEST Arabidopsis thaliana protein match is: S-adenosyl-L-methionine-dependent methyltransferases superfamily protein (TAIR:AT3G11480.1); Has 935 B…	T
'17.8.1'	'hormone metabolism.salicylic acid.synthesis-degradation'	'zm00001d043734'	'(at4g36470 : 306.0) S-adenosyl-L-methionine-dependent methyltransferases superfamily protein; CONTAINS InterPro DOMAIN/s: SAM dependent carboxyl methyltransferase (InterPro:IPR005299); BEST Arabidopsis thaliana protein match is: S-adenosyl-L-methionine-dependent methyltransferases superfamily protein (TAIR:AT3G11480.1); Has 909 Blast hits to 891 proteins in 125 species: Archae - 0; Bacteria - 69…	T
'17.8.1'	'hormone metabolism.salicylic acid.synthesis-degradation'	'zm00001d004366'	'(at1g05680 : 315.0) Encodes a UDP-glucosyltransferase, UGT74E2, that acts on IBA (indole-3-butyric acid) and affects auxin homeostasis. The transcript and protein levels of this enzyme are strongly induced by H2O2 and may allow integration of ROS (reactive oxygen species) and auxin signaling. This enzyme can also transfer glycosyl groups to several compounds related to the explosive TNT when thi…	T
'17.8.1.1.4'	'hormone metabolism.salicylic acid.synthesis-degradation.synthesis.SA glucosyltransferase ether bond making SAG'	'zm00001d004366'	'(at1g05680 : 315.0) Encodes a UDP-glucosyltransferase, UGT74E2, that acts on IBA (indole-3-butyric acid) and affects auxin homeostasis. The transcript and protein levels of this enzyme are strongly induced by H2O2 and may allow integration of ROS (reactive oxygen species) and auxin signaling. This enzyme can also transfer glycosyl groups to several compounds related to the explosive TNT when thi…	T
'17.8.1.1.5'	'hormone metabolism.salicylic acid.synthesis-degradation.synthesis.SA glucosyltransferase ester and ether bond making SGE, SAG'	'zm00001d004366'	'(at1g05680 : 315.0) Encodes a UDP-glucosyltransferase, UGT74E2, that acts on IBA (indole-3-butyric acid) and affects auxin homeostasis. The transcript and protein levels of this enzyme are strongly induced by H2O2 and may allow integration of ROS (reactive oxygen species) and auxin signaling. This enzyme can also transfer glycosyl groups to several compounds related to the explosive TNT when thi…	T
'17.8.1.1.7'	'hormone metabolism.salicylic acid.synthesis-degradation.synthesis.methyl-SA methylesterase'	'zm00001d044765'	'(at5g04370 : 252.0) A member of the Arabidopsis SABATH methyltransferase gene family. Encodes NAMT1, a methyltransferase that methylates nicotinic acid.; NAMT1; CONTAINS InterPro DOMAIN/s: SAM dependent carboxyl methyltransferase (InterPro:IPR005299); BEST Arabidopsis thaliana protein match is: S-adenosyl-L-methionine-dependent methyltransferases superfamily protein (TAIR:AT3G11480.1); Has 935 B…	T
'18'	'Co-factor and vitamine metabolism'	'zm00001d015344'	'(at2g25710 : 369.0) Encodes holocarboxylase synthase.; holocarboxylase synthase 1 (HCS1); FUNCTIONS IN: biotin-[acetyl-CoA-carboxylase] ligase activity, catalytic activity; INVOLVED IN: protein modification process; EXPRESSED IN: 22 plant structures; EXPRESSED DURING: 13 growth stages; CONTAINS InterPro DOMAIN/s: Biotin protein ligase, C-terminal (InterPro:IPR003142), Biotin/lipoate A/B protein …	T
'18.1'	'Co-factor and vitamine metabolism.molybdenum cofactor'	'zm00001d016850'	'(at4g10100 : 100.0) molybdenum cofactor synthesis family protein, similar to Molybdenum cofactor synthesis protein 2 small subunit (Molybdopterin- synthase small subunit) (MOCS2A) (MOCO1-A) (Swiss-Prot:O96033) (Homo sapiens); contains TIGRFAM TIGR01682: molybdopterin converting factor, subunit 1; sir loss-of-function mutants are resistant to sirtinol, a modulator of auxin signaling.; "co-factor …	T
'18.3'	'Co-factor and vitamine metabolism.riboflavin'	'zm00001d012707'	'(at4g21470 : 167.0) Bifunctional enzyme that catalyzes hydrolysis of FMN to riboflavin, and phosphorylation of riboflavin to FMN.; riboflavin kinase/FMN hydrolase (FMN/FHY); FUNCTIONS IN: riboflavin kinase activity, FMN adenylyltransferase activity; INVOLVED IN: riboflavin biosynthetic process, metabolic process; LOCATED IN: endomembrane system; EXPRESSED IN: 22 plant structures; EXPRESSED DURIN…	T
'18.3.1'	'Co-factor and vitamine metabolism.riboflavin.GTP cyclohydrolase II'	'zm00001d016963'	'(at5g64300 : 664.0) encodes GTP cyclohydrolase II that can functionally complement E. coli mutant deficient in this gene. It also has 3,4-dihydroxy-2-butanone-4-phosphate synthase activity which makes it a bifunctional enzyme involved in the formation of the pyrimidine and of the carbohydrate from GTP and ribulose-5-phosphate, respectively; GTP cyclohydrolase II (GCH); FUNCTIONS IN: 3,4-dihydrox…	T
'18.3.2'	'Co-factor and vitamine metabolism.riboflavin.riboflavin synthase'	'zm00001d023863'	'(at2g20690 : 218.0) A synthetic gene encoding the catalytic domain of the Arabidopsis thaliana gene At2g20690 was recombinant expressed in E. coli demonstrating the molecular function of riboflavin synthase.; lumazine-binding family protein; FUNCTIONS IN: binding, riboflavin synthase activity; INVOLVED IN: riboflavin biosynthetic process; LOCATED IN: chloroplast; EXPRESSED IN: 22 plant structure…	T
'18.6'	'Co-factor and vitamine metabolism.biotin'	'zm00001d016866'	'(at2g31955 : 556.0) COFACTOR OF NITRATE REDUCTASE AND XANTHINE DEHYDROGENASE 2. Encodes a protein involved in molybdenum cofactor biosynthesis. Homologous to E.coli moaA. Expression is abundant in all tissues examined, particularly in roots. Appears to have targeting signals for chloroplast or mitochondria.; cofactor of nitrate reductase and xanthine dehydrogenase 2 (CNX2); CONTAINS InterPro DOM…	T
'19.10'	'tetrapyrrole synthesis.magnesium chelatase'	'zm00001d013013'	'(o24133|chld_tobac : 1006.0) Magnesium-chelatase subunit chlD, chloroplast precursor (EC 6.6.1.1) (Mg-protoporphyrin IX chelatase) (Mg-chelatase subunit D) - Nicotiana tabacum (Common tobacco) & (at1g08520 : 984.0) Encodes the CHLD subunit of the Mg-chelatase enzyme involved in chlorophyll biosynthesis. Lines carrying recessive mutations of this locus are white and seedling lethal.; ALBINA 1 (AL…	T
'19.14'	'tetrapyrrole synthesis.protochlorophyllide reductase'	'zm00001d001820'	'(q41578|pora_wheat : 501.0) Protochlorophyllide reductase A, chloroplast precursor (EC 1.3.1.33) (PCR A) (NADPH-protochlorophyllide oxidoreductase A) (POR A) - Triticum aestivum (Wheat) & (at5g54190 : 446.0) light-dependent NADPH:protochlorophyllide oxidoreductase A; protochlorophyllide oxidoreductase A (PORA); FUNCTIONS IN: oxidoreductase activity, protochlorophyllide reductase activity; INVOLV…	T
'19.16'	'tetrapyrrole synthesis.chlorophyll b synthase'	'zm00001d004531'	'(q8s7e1|cao_orysa : 150.0) Chlorophyllide a oxygenase, chloroplast precursor (EC 1.13.12.14) (Chlorophyll a oxygenase) (Chlorophyll b synthase) - Oryza sativa (Rice) & (at1g44446 : 135.0) Encodes chlorophyllide <i>a</i> oxygenase which converts chlorophyllide <i>a</i> to chlorophyllide <i>b</i> by catalyzing two successive hydroxylations at the 7-methyl group of chlorophyllide <i>a</i> . Mutants…	T
'19.7'	'tetrapyrrole synthesis.uroporphyrinogen decarboxylase'	'zm00001d044321'	'(at3g14930 : 242.0) HEME1; FUNCTIONS IN: uroporphyrinogen decarboxylase activity; INVOLVED IN: response to cadmium ion; LOCATED IN: chloroplast; EXPRESSED IN: 23 plant structures; EXPRESSED DURING: 14 growth stages; CONTAINS InterPro DOMAIN/s: Uroporphyrinogen decarboxylase HemE (InterPro:IPR006361), Uroporphyrinogen decarboxylase (URO-D) (InterPro:IPR000257); BEST Arabidopsis thaliana protein m…	T
'19.8'	'tetrapyrrole synthesis.coproporphyrinogen III oxidase'	'zm00001d026277'	'(q42840|hem6_horvu : 433.0) Coproporphyrinogen III oxidase, chloroplast precursor (EC 1.3.3.3) (Coproporphyrinogenase) (Coprogen oxidase) - Hordeum vulgare (Barley) & (at1g03475 : 414.0) Encodes coproporphyrinogen III oxidase, a key enzyme in the biosynthetic pathway of chlorophyll and heme, a tetrapyrrole pathway. Mutants express cytological and molecular markers associated with the defense res…	T
'19.8'	'tetrapyrrole synthesis.coproporphyrinogen III oxidase'	'zm00001d002358'	'(q42840|hem6_horvu : 573.0) Coproporphyrinogen III oxidase, chloroplast precursor (EC 1.3.3.3) (Coproporphyrinogenase) (Coprogen oxidase) - Hordeum vulgare (Barley) & (at1g03475 : 559.0) Encodes coproporphyrinogen III oxidase, a key enzyme in the biosynthetic pathway of chlorophyll and heme, a tetrapyrrole pathway. Mutants express cytological and molecular markers associated with the defense res…	T
'19.9'	'tetrapyrrole synthesis.protoporphyrin IX oxidase'	'zm00001d008203'	'(at4g01690 : 186.0) Encodes protoporphyrinogen oxidase (PPOX).; PPOX; FUNCTIONS IN: oxygen-dependent protoporphyrinogen oxidase activity; INVOLVED IN: porphyrin biosynthetic process; LOCATED IN: chloroplast, chloroplast envelope; EXPRESSED IN: 25 plant structures; EXPRESSED DURING: 16 growth stages; CONTAINS InterPro DOMAIN/s: Amine oxidase (InterPro:IPR002937), Protoporphyrinogen oxidase (Inter…	T
'19.99'	'tetrapyrrole synthesis.unspecified'	'zm00001d031934'	'(at1g19670 : 204.0) Chlorophyllase is the first enzyme involved in chlorophyll degradation. It catalyzes the hydrolysis of the ester bond to yield chlorophyllide and phytol. AtCLH1 lacks a typical signal sequence for the chloroplast. Its expression is induced rapidly by methyljasmonate, a known promoter of senescence and chlorophyll degradation.; chlorophyllase 1 (CLH1); FUNCTIONS IN: chlorophyl…	T
'2.1.2.2'	'major CHO metabolism.synthesis.starch.starch synthase'	'zm00001d045261'	'(q40739|ssy1_orysa : 376.0) Soluble starch synthase 1, chloroplast precursor (EC 2.4.1.21) (Starch synthase I) (SSS 1) - Oryza sativa (Rice) & (at5g24300 : 305.0) SSI is a plastidial enzyme and crucial for the synthesis of normal amylopectin in the leaves of Arabidopsis. The absence of SSI results in a deficiency in the number of shorter glucans which in turn affect the formation and connection …	T
'2.1.2.2'	'major CHO metabolism.synthesis.starch.starch synthase'	'zm00001d029360'	'(q8ll05|ssg1b_horvu : 313.0) Granule-bound starch synthase 1b, chloroplast precursor (EC 2.4.1.242) (Granule-bound starch synthase Ib) (Fragment) - Hordeum vulgare (Barley) & (at1g32900 : 242.0) UDP-Glycosyltransferase superfamily protein; FUNCTIONS IN: protein binding, transferase activity, transferring glycosyl groups; INVOLVED IN: biosynthetic process, glucan biosynthetic process; LOCATED IN:…	T
'2.1.2.2'	'major CHO metabolism.synthesis.starch.starch synthase'	'zm00001d027242'	'(q8ll05|ssg1b_horvu : 362.0) Granule-bound starch synthase 1b, chloroplast precursor (EC 2.4.1.242) (Granule-bound starch synthase Ib) (Fragment) - Hordeum vulgare (Barley) & (at1g32900 : 282.0) UDP-Glycosyltransferase superfamily protein; FUNCTIONS IN: protein binding, transferase activity, transferring glycosyl groups; INVOLVED IN: biosynthetic process, glucan biosynthetic process; LOCATED IN:…	T
'2.1.2.2'	'major CHO metabolism.synthesis.starch.starch synthase'	'zm00001d019479'	'(q8ll05|ssg1b_horvu : 354.0) Granule-bound starch synthase 1b, chloroplast precursor (EC 2.4.1.242) (Granule-bound starch synthase Ib) (Fragment) - Hordeum vulgare (Barley) & (at1g32900 : 289.0) UDP-Glycosyltransferase superfamily protein; FUNCTIONS IN: protein binding, transferase activity, transferring glycosyl groups; INVOLVED IN: biosynthetic process, glucan biosynthetic process; LOCATED IN:…	T
'2.1.2.2'	'major CHO metabolism.synthesis.starch.starch synthase'	'zm00001d002256'	'(q43846|ssy3_soltu : 1081.0) Soluble starch synthase 3, chloroplast precursor (EC 2.4.1.21) (SS III) (Soluble starch synthase III) - Solanum tuberosum (Potato) & (at1g11720 : 1011.0) Encodes a starch synthase that in addition to its role in starch biosynthesis also has a negative regulatory function in the biosynthesis of transient starch. The protein apparently contains a starch-binding domain …	T
'2.1.2.3'	'major CHO metabolism.synthesis.starch.starch branching'	'zm00001d003817'	'(q08047|glgb_maize : 966.0) 1,4-alpha-glucan branching enzyme IIB, chloroplast precursor (EC 2.4.1.18) (Starch branching enzyme IIB) (Q-enzyme) - Zea mays (Maize) & (at5g03650 : 917.0) Encodes starch branching enzyme (E.C.2.4.1.18) similar to SBE2 from maize and rice. Expressed throughout the plant and highest in seedlings and cauline leaves.; starch branching enzyme 2.2 (SBE2.2); FUNCTIONS IN: …	T
'2.2.1.1'	'major CHO metabolism.degradation.sucrose.fructokinase'	'zm00001d033181'	'(at1g69200 : 470.0) Encodes a fructokinase-like protein (AT3G54090/FLN1, AT1G69200/FLN2), a member of the pfkB-carbohydrate kinase family. FLN1 and FLN2 are potential plastidial thioredoxin z (TRX z) targets.; fructokinase-like 2 (FLN2); FUNCTIONS IN: kinase activity; INVOLVED IN: acetate fermentation, sucrose biosynthetic process, sucrose catabolic process, using beta-fructofuranosidase; LOCATE…	T
'2.2.1.3.2'	'major CHO metabolism.degradation.sucrose.invertases.cell wall'	'zm00001d025354'	'(q56ud4|inv2_orysa : 897.0) Beta-fructofuranosidase, insoluble isoenzyme 2 precursor (EC 3.2.1.26) (Sucrose hydrolase 2) (Invertase 2) (Cell wall beta-fructosidase 2) (OsCIN2) - Oryza sativa (Rice) & (at3g52600 : 573.0) cell wall invertase 2 (CWINV2); FUNCTIONS IN: hydrolase activity, hydrolyzing O-glycosyl compounds; INVOLVED IN: carbohydrate metabolic process; EXPRESSED IN: 9 plant structures;…	T
'2.2.1.3.3'	'major CHO metabolism.degradation.sucrose.invertases.vacuolar'	'zm00001d025943'	'(p49175|inv1_maize : 994.0) Beta-fructofuranosidase 1 precursor (EC 3.2.1.26) (Sucrose 1) (Invertase 1) - Zea mays (Maize) & (at1g62660 : 682.0) Glycosyl hydrolases family 32 protein; FUNCTIONS IN: hydrolase activity, hydrolyzing O-glycosyl compounds; INVOLVED IN: sucrose catabolic process, using beta-fructofuranosidase, carbohydrate metabolic process; LOCATED IN: vacuole; EXPRESSED IN: 23 plant…	T
'2.2.2.2'	'major CHO metabolism.degradation.starch.starch phosphorylase'	'zm00001d034074'	'(p27598|phsl_ipoba : 1291.0) Alpha-1,4 glucan phosphorylase L isozyme, chloroplast precursor (EC 2.4.1.1) (Starch phosphorylase L) - Ipomoea batatas (Sweet potato) (Batate) & (at3g29320 : 1266.0) Encodes a plastidic alpha-glucan phosphorylase. In vitro, the enzyme has a preference for maltooligosaccharides, such as maltoheptaose.; Glycosyl transferase, family 35; FUNCTIONS IN: phosphorylase acti…	T
'20'	'stress'	'zm00001d021684'	'(at1g11330 : 380.0) S-locus lectin protein kinase family protein; FUNCTIONS IN: in 6 functions; INVOLVED IN: protein amino acid phosphorylation, recognition of pollen; LOCATED IN: plasma membrane; EXPRESSED IN: 21 plant structures; EXPRESSED DURING: 13 growth stages; CONTAINS InterPro DOMAIN/s: Curculin-like (mannose-binding) lectin (InterPro:IPR001480), Apple-like (InterPro:IPR003609), PAN-2 do…	T
'20.1'	'stress.biotic'	'zm00001d048950'	'(p28814|barw_horvu : 207.0) Barwin - Hordeum vulgare (Barley) & (at3g04720 : 196.0) Encodes a protein similar to the antifungal chitin-binding protein hevein from rubber tree latex. mRNA levels increase in response to ethylene and turnip crinkle virus infection.; pathogenesis-related 4 (PR4); FUNCTIONS IN: chitin binding; INVOLVED IN: in 6 processes; LOCATED IN: endomembrane system; EXPRESSED IN…	T
'20.1'	'stress.biotic'	'zm00001d048949'	'(p28814|barw_horvu : 207.0) Barwin - Hordeum vulgare (Barley) & (at3g04720 : 196.0) Encodes a protein similar to the antifungal chitin-binding protein hevein from rubber tree latex. mRNA levels increase in response to ethylene and turnip crinkle virus infection.; pathogenesis-related 4 (PR4); FUNCTIONS IN: chitin binding; INVOLVED IN: in 6 processes; LOCATED IN: endomembrane system; EXPRESSED IN…	T
'20.1'	'stress.biotic'	'zm00001d048635'	'(at3g07040 : 86.3) Contains an N-terminal tripartite nucleotide binding site and a C-terminal tandem array of leucine-rich repeats. Confers resistance to Pseudomonas syringae strains that carry the avirulence genes avrB and avrRpm1.; RESISTANCE TO P. SYRINGAE PV MACULICOLA 1 (RPM1); FUNCTIONS IN: protein binding, nucleotide binding; INVOLVED IN: defense response, plant-type hypersensitive respon…	T
'20.1'	'stress.biotic'	'zm00001d042750'	'(at2g35460 : 94.4) Late embryogenesis abundant (LEA) hydroxyproline-rich glycoprotein family; CONTAINS InterPro DOMAIN/s: Late embryogenesis abundant protein, group 2 (InterPro:IPR004864); BEST Arabidopsis thaliana protein match is: NDR1/HIN1-like 2 (TAIR:AT3G11650.1); Has 974 Blast hits to 974 proteins in 28 species: Archae - 0; Bacteria - 0; Metazoa - 0; Fungi - 0; Plants - 974; Viruses - 0; O…	T
'20.1'	'stress.biotic'	'zm00001d034555'	'(at3g07040 : 139.0) Contains an N-terminal tripartite nucleotide binding site and a C-terminal tandem array of leucine-rich repeats. Confers resistance to Pseudomonas syringae strains that carry the avirulence genes avrB and avrRpm1.; RESISTANCE TO P. SYRINGAE PV MACULICOLA 1 (RPM1); FUNCTIONS IN: protein binding, nucleotide binding; INVOLVED IN: defense response, plant-type hypersensitive respo…	T
'20.1'	'stress.biotic'	'zm00001d032618'	'(at2g15220 : 263.0) Plant basic secretory protein (BSP) family protein; INVOLVED IN: defense response; LOCATED IN: endomembrane system; EXPRESSED DURING: seedling growth; CONTAINS InterPro DOMAIN/s: Uncharacterised protein family, basic secretory protein (InterPro:IPR007541); BEST Arabidopsis thaliana protein match is: Plant basic secretory protein (BSP) family protein (TAIR:AT2G15130.1); Has 29…	T
'20.1'	'stress.biotic'	'zm00001d032527'	'(at5g17540 : 441.0) HXXXD-type acyl-transferase family protein; FUNCTIONS IN: transferase activity, transferring acyl groups other than amino-acyl groups; INVOLVED IN: biological_process unknown; LOCATED IN: cellular_component unknown; EXPRESSED IN: 9 plant structures; EXPRESSED DURING: 4 anthesis, C globular stage, F mature embryo stage, petal differentiation and expansion stage; CONTAINS Inter…	T
'20.1'	'stress.biotic'	'zm00001d031934'	'(at1g19670 : 204.0) Chlorophyllase is the first enzyme involved in chlorophyll degradation. It catalyzes the hydrolysis of the ester bond to yield chlorophyllide and phytol. AtCLH1 lacks a typical signal sequence for the chloroplast. Its expression is induced rapidly by methyljasmonate, a known promoter of senescence and chlorophyll degradation.; chlorophyllase 1 (CLH1); FUNCTIONS IN: chlorophyl…	T
'20.1'	'stress.biotic'	'zm00001d029558'	'(q00008|prms_maize : 213.0) Pathogenesis-related protein PRMS precursor - Zea mays (Maize) & (at3g09590 : 169.0) CAP (Cysteine-rich secretory proteins, Antigen 5, and Pathogenesis-related 1 protein) superfamily protein; FUNCTIONS IN: molecular_function unknown; INVOLVED IN: biological_process unknown; LOCATED IN: endomembrane system, extracellular region; EXPRESSED IN: male gametophyte, pollen t…	T
'20.1'	'stress.biotic'	'zm00001d024037'	'(p49235|bglc_maize : 1009.0) Beta-glucosidase, chloroplast precursor (EC 3.2.1.21) (Gentiobiase) (Cellobiase) (Beta-D-glucoside glucohydrolase) - Zea mays (Maize) & (at2g44450 : 483.0) beta glucosidase 15 (BGLU15); FUNCTIONS IN: cation binding, hydrolase activity, hydrolyzing O-glycosyl compounds, catalytic activity; INVOLVED IN: carbohydrate metabolic process; LOCATED IN: cell wall, plant-type …	T
'20.1'	'stress.biotic'	'zm00001d021176'	'(at3g07040 : 247.0) Contains an N-terminal tripartite nucleotide binding site and a C-terminal tandem array of leucine-rich repeats. Confers resistance to Pseudomonas syringae strains that carry the avirulence genes avrB and avrRpm1.; RESISTANCE TO P. SYRINGAE PV MACULICOLA 1 (RPM1); FUNCTIONS IN: protein binding, nucleotide binding; INVOLVED IN: defense response, plant-type hypersensitive respo…	T
'20.1'	'stress.biotic'	'zm00001d016832'	'(at1g33970 : 275.0) P-loop containing nucleoside triphosphate hydrolases superfamily protein; FUNCTIONS IN: GTP binding; INVOLVED IN: response to bacterium; LOCATED IN: cellular_component unknown; EXPRESSED IN: 22 plant structures; EXPRESSED DURING: 13 growth stages; CONTAINS InterPro DOMAIN/s: AIG1 (InterPro:IPR006703); BEST Arabidopsis thaliana protein match is: P-loop containing nucleoside tr…	T
'20.1'	'stress.biotic'	'zm00001d016435'	'(at3g53150 : 179.0) UDP-glucosyl transferase 73D1 (UGT73D1); FUNCTIONS IN: transferase activity, transferring hexosyl groups, UDP-glycosyltransferase activity; INVOLVED IN: metabolic process; LOCATED IN: endomembrane system; EXPRESSED IN: stem, sepal, stamen; EXPRESSED DURING: 4 anthesis; CONTAINS InterPro DOMAIN/s: UDP-glucuronosyl/UDP-glucosyltransferase (InterPro:IPR002213); BEST Arabidopsis …	T
'20.1'	'stress.biotic'	'zm00001d016429'	'(at2g36780 : 129.0) UDP-Glycosyltransferase superfamily protein; FUNCTIONS IN: UDP-glycosyltransferase activity, transferase activity, transferring glycosyl groups; INVOLVED IN: metabolic process; LOCATED IN: cellular_component unknown; CONTAINS InterPro DOMAIN/s: UDP-glucuronosyl/UDP-glucosyltransferase (InterPro:IPR002213); BEST Arabidopsis thaliana protein match is: UDP-Glycosyltransferase su…	T
'20.1'	'stress.biotic'	'zm00001d016424'	'(at2g36790 : 87.0) The At2g36790 gene encodes a UDP-glucose:flavonol-3-O-glycoside-7-O-glucosyltransferase (UGT73C6)attaching a glucosyl residue to the 7-O-position of the flavonols kaempferol, quercetin and their 3-O-glycoside derivatives.; UDP-glucosyl transferase 73C6 (UGT73C6); CONTAINS InterPro DOMAIN/s: UDP-glucuronosyl/UDP-glucosyltransferase (InterPro:IPR002213); BEST Arabidopsis thalian…	T
'20.1'	'stress.biotic'	'zm00001d016417'	'(at2g36780 : 177.0) UDP-Glycosyltransferase superfamily protein; FUNCTIONS IN: UDP-glycosyltransferase activity, transferase activity, transferring glycosyl groups; INVOLVED IN: metabolic process; LOCATED IN: cellular_component unknown; CONTAINS InterPro DOMAIN/s: UDP-glucuronosyl/UDP-glucosyltransferase (InterPro:IPR002213); BEST Arabidopsis thaliana protein match is: UDP-Glycosyltransferase su…	T
'20.1'	'stress.biotic'	'zm00001d015242'	'(at2g24390 : 152.0) AIG2-like (avirulence induced gene) family protein; FUNCTIONS IN: molecular_function unknown; INVOLVED IN: biological_process unknown; EXPRESSED IN: 11 plant structures; EXPRESSED DURING: 7 growth stages; CONTAINS InterPro DOMAIN/s: Butirosin biosynthesis, BtrG-like (InterPro:IPR013024), AIG2-like (InterPro:IPR009288); BEST Arabidopsis thaliana protein match is: AIG2-like (av…	T
'20.1'	'stress.biotic'	'zm00001d014842'	'(p24626|chi1_orysa : 354.0) Basic endochitinase 1 precursor (EC 3.2.1.14) - Oryza sativa (Rice) & (at3g12500 : 322.0) encodes a basic chitinase involved in ethylene/jasmonic acid mediated signalling pathway during systemic acquired resistance based on expression analyses.; basic chitinase (HCHIB); FUNCTIONS IN: chitinase activity; INVOLVED IN: response to cadmium ion, defense response to fungus,…	T
'20.1'	'stress.biotic'	'zm00001d014840'	'(q9frv1|chia_secce : 259.0) Basic endochitinase A precursor (EC 3.2.1.14) (Rye seed chitinase-a) (RSC-a) - Secale cereale (Rye) & (at3g12500 : 225.0) encodes a basic chitinase involved in ethylene/jasmonic acid mediated signalling pathway during systemic acquired resistance based on expression analyses.; basic chitinase (HCHIB); FUNCTIONS IN: chitinase activity; INVOLVED IN: response to cadmium …	T
'20.1'	'stress.biotic'	'zm00001d014649'	'(at3g07040 : 425.0) Contains an N-terminal tripartite nucleotide binding site and a C-terminal tandem array of leucine-rich repeats. Confers resistance to Pseudomonas syringae strains that carry the avirulence genes avrB and avrRpm1.; RESISTANCE TO P. SYRINGAE PV MACULICOLA 1 (RPM1); FUNCTIONS IN: protein binding, nucleotide binding; INVOLVED IN: defense response, plant-type hypersensitive respo…	T
'20.1'	'stress.biotic'	'zm00001d009936'	'(q9frv1|chia_secce : 429.0) Basic endochitinase A precursor (EC 3.2.1.14) (Rye seed chitinase-a) (RSC-a) - Secale cereale (Rye) & (at3g12500 : 383.0) encodes a basic chitinase involved in ethylene/jasmonic acid mediated signalling pathway during systemic acquired resistance based on expression analyses.; basic chitinase (HCHIB); FUNCTIONS IN: chitinase activity; INVOLVED IN: response to cadmium …	T
'20.1'	'stress.biotic'	'zm00001d004758'	'(at1g65870 : 143.0) Disease resistance-responsive (dirigent-like protein) family protein; FUNCTIONS IN: molecular_function unknown; INVOLVED IN: lignan biosynthetic process, defense response; LOCATED IN: cell wall; EXPRESSED IN: 13 plant structures; EXPRESSED DURING: 9 growth stages; CONTAINS InterPro DOMAIN/s: Plant disease resistance response protein (InterPro:IPR004265); BEST Arabidopsis thal…	T
'20.1'	'stress.biotic'	'novel00755'	'(at2g02180 : 143.0) Necessary for the efficient multiplication of tobamoviruses.; tobamovirus multiplication protein 3 (TOM3); INVOLVED IN: viral replication complex formation and maintenance; LOCATED IN: endomembrane system; EXPRESSED IN: 23 plant structures; EXPRESSED DURING: 14 growth stages; CONTAINS InterPro DOMAIN/s: Protein of unknown function DUF1084 (InterPro:IPR009457); BEST Arabidopsi…	T
'20.1.1'	'stress.biotic.respiratory burst'	'zm00001d043543'	'(at1g64060 : 963.0) Interacts with AtrbohD gene to fine tune the spatial control of ROI production and hypersensitive response to cell in and around infection site.; respiratory burst oxidase protein F (RBOH F); FUNCTIONS IN: NAD(P)H oxidase activity; INVOLVED IN: in 10 processes; LOCATED IN: plasma membrane, integral to plasma membrane; EXPRESSED IN: 22 plant structures; EXPRESSED DURING: 13 gr…	T
'20.1.3.1'	'stress.biotic.signalling.MLO-like'	'zm00001d046781'	'(at4g24250 : 386.0) A member of a large family of seven-transmembrane domain proteins specific to plants, homologs of the barley mildew resistance locus o (MLO) protein. The Arabidopsis genome contains 15 genes encoding MLO proteins, with localization in plasma membrane. Phylogenetic analysis revealed four clades of closely-related AtMLO genes. ATMLO13 belongs to the clade II, with ATMLO1 and AT…	T
'20.1.7'	'stress.biotic.PR-proteins'	'zm00001d034555'	'(at3g07040 : 139.0) Contains an N-terminal tripartite nucleotide binding site and a C-terminal tandem array of leucine-rich repeats. Confers resistance to Pseudomonas syringae strains that carry the avirulence genes avrB and avrRpm1.; RESISTANCE TO P. SYRINGAE PV MACULICOLA 1 (RPM1); FUNCTIONS IN: protein binding, nucleotide binding; INVOLVED IN: defense response, plant-type hypersensitive respo…	T
'20.1.7'	'stress.biotic.PR-proteins'	'zm00001d029558'	'(q00008|prms_maize : 213.0) Pathogenesis-related protein PRMS precursor - Zea mays (Maize) & (at3g09590 : 169.0) CAP (Cysteine-rich secretory proteins, Antigen 5, and Pathogenesis-related 1 protein) superfamily protein; FUNCTIONS IN: molecular_function unknown; INVOLVED IN: biological_process unknown; LOCATED IN: endomembrane system, extracellular region; EXPRESSED IN: male gametophyte, pollen t…	T
'20.1.7'	'stress.biotic.PR-proteins'	'zm00001d021176'	'(at3g07040 : 247.0) Contains an N-terminal tripartite nucleotide binding site and a C-terminal tandem array of leucine-rich repeats. Confers resistance to Pseudomonas syringae strains that carry the avirulence genes avrB and avrRpm1.; RESISTANCE TO P. SYRINGAE PV MACULICOLA 1 (RPM1); FUNCTIONS IN: protein binding, nucleotide binding; INVOLVED IN: defense response, plant-type hypersensitive respo…	T
'20.1.7'	'stress.biotic.PR-proteins'	'zm00001d004758'	'(at1g65870 : 143.0) Disease resistance-responsive (dirigent-like protein) family protein; FUNCTIONS IN: molecular_function unknown; INVOLVED IN: lignan biosynthetic process, defense response; LOCATED IN: cell wall; EXPRESSED IN: 13 plant structures; EXPRESSED DURING: 9 growth stages; CONTAINS InterPro DOMAIN/s: Plant disease resistance response protein (InterPro:IPR004265); BEST Arabidopsis thal…	T
'20.1.7'	'stress.biotic.PR-proteins'	'zm00001d004753'	'(at1g65870 : 147.0) Disease resistance-responsive (dirigent-like protein) family protein; FUNCTIONS IN: molecular_function unknown; INVOLVED IN: lignan biosynthetic process, defense response; LOCATED IN: cell wall; EXPRESSED IN: 13 plant structures; EXPRESSED DURING: 9 growth stages; CONTAINS InterPro DOMAIN/s: Plant disease resistance response protein (InterPro:IPR004265); BEST Arabidopsis thal…	T
'20.2'	'stress.abiotic'	'zm00001d033455'	'(p33679|zeam_maize : 315.0) Zeamatin precursor - Zea mays (Maize) & (at4g11650 : 278.0) osmotin-like protein; osmotin 34 (OSM34); INVOLVED IN: defense response to fungus, incompatible interaction, response to salt stress, defense response to bacterium, incompatible interaction, response to other organism; LOCATED IN: endomembrane system; EXPRESSED IN: 6 plant structures; EXPRESSED DURING: 4 anth…	T
'20.2'	'stress.abiotic'	'zm00001d015724'	'(at3g15620 : 341.0) Required for photorepair of 6-4 photoproducts in Arabidopsis thaliana.; UV REPAIR DEFECTIVE 3 (UVR3); CONTAINS InterPro DOMAIN/s: Rossmann-like alpha/beta/alpha sandwich fold (InterPro:IPR014729), DNA photolyase, N-terminal (InterPro:IPR006050), DNA photolyase, FAD-binding/Cryptochrome, C-terminal (InterPro:IPR005101); BEST Arabidopsis thaliana protein match is: cryptochrome …	T
'20.2.1'	'stress.abiotic.heat'	'zm00001d053965'	'(p19243|hsp11_pea : 103.0) 18.1 kDa class I heat shock protein (HSP 18.1) - Pisum sativum (Garden pea) & (at5g59720 : 100.0) encodes a low molecular weight heat shock protein that contains the heat shock element in the promoter region. Expression is induced in response to heat shock.; heat shock protein 18.2 (HSP18.2); CONTAINS InterPro DOMAIN/s: Heat shock protein Hsp20 (InterPro:IPR002068), HS…	T
'20.2.1'	'stress.abiotic.heat'	'zm00001d053667'	'(at3g12170 : 326.0) Chaperone DnaJ-domain superfamily protein; FUNCTIONS IN: unfolded protein binding, heat shock protein binding; INVOLVED IN: protein folding; LOCATED IN: cellular_component unknown; EXPRESSED IN: 24 plant structures; EXPRESSED DURING: 15 growth stages; CONTAINS InterPro DOMAIN/s: Molecular chaperone, heat shock protein, Hsp40, DnaJ (InterPro:IPR015609), Heat shock protein DnaJ…	T
'20.2.1'	'stress.abiotic.heat'	'zm00001d052902'	'(at3g12170 : 244.0) Chaperone DnaJ-domain superfamily protein; FUNCTIONS IN: unfolded protein binding, heat shock protein binding; INVOLVED IN: protein folding; LOCATED IN: cellular_component unknown; EXPRESSED IN: 24 plant structures; EXPRESSED DURING: 15 growth stages; CONTAINS InterPro DOMAIN/s: Molecular chaperone, heat shock protein, Hsp40, DnaJ (InterPro:IPR015609), Heat shock protein DnaJ…	T
'20.2.1'	'stress.abiotic.heat'	'zm00001d052809'	'(at2g04030 : 1071.0) Encodes a chloroplast-targeted 90-kDa heat shock protein located in the stroma involved in red-light mediated deetiolation response. Mutants are resistant to chlorate, have elongated hypocotyls in light, and affect the expression of NR2, CAB, and RBCS but NOT NR1 and NiR.; CR88; FUNCTIONS IN: ATP binding; INVOLVED IN: in 7 processes; LOCATED IN: mitochondrion, chloroplast st…	T
'20.2.1'	'stress.abiotic.heat'	'zm00001d051609'	'(at4g16660 : 280.0) heat shock protein 70 (Hsp 70) family protein; FUNCTIONS IN: ATP binding; LOCATED IN: plasma membrane, chloroplast; EXPRESSED IN: 24 plant structures; EXPRESSED DURING: 13 growth stages; CONTAINS InterPro DOMAIN/s: Heat shock protein 70, conserved site (InterPro:IPR018181), Heat shock protein Hsp70 (InterPro:IPR001023), Heat shock protein 70 (InterPro:IPR013126); BEST Arabido…	T
'20.2.1'	'stress.abiotic.heat'	'zm00001d031129'	'(at2g27140 : 84.3) HSP20-like chaperones superfamily protein; FUNCTIONS IN: molecular_function unknown; INVOLVED IN: response to heat; LOCATED IN: membrane; EXPRESSED IN: 19 plant structures; EXPRESSED DURING: 12 growth stages; CONTAINS InterPro DOMAIN/s: Heat shock protein Hsp20 (InterPro:IPR002068), HSP20-like chaperone (InterPro:IPR008978); BEST Arabidopsis thaliana protein match is: HSP20-li…	T
'20.2.1'	'stress.abiotic.heat'	'zm00001d029722'	'(at2g22360 : 204.0) DNAJ heat shock family protein; FUNCTIONS IN: unfolded protein binding, heat shock protein binding, ATP binding; INVOLVED IN: protein folding, response to heat; LOCATED IN: chloroplast thylakoid membrane, chloroplast; EXPRESSED IN: 23 plant structures; EXPRESSED DURING: 13 growth stages; CONTAINS InterPro DOMAIN/s: Molecular chaperone, heat shock protein, Hsp40, DnaJ (InterPr…	T
'20.2.1'	'stress.abiotic.heat'	'zm00001d026467'	'(at5g42020 : 84.0) Luminal binding protein (BiP2) involved in polar nuclei fusion during proliferation of endosperm nuclei.; luminal binding protein (BIP); FUNCTIONS IN: ATP binding; INVOLVED IN: protein folding, response to cadmium ion, response to heat, polar nucleus fusion, response to endoplasmic reticulum stress; LOCATED IN: in 8 components; EXPRESSED IN: 7 plant structures; EXPRESSED DURIN…	T
'20.2.1'	'stress.abiotic.heat'	'zm00001d020390'	'(at1g54050 : 94.7) HSP20-like chaperones superfamily protein; CONTAINS InterPro DOMAIN/s: Heat shock protein Hsp20 (InterPro:IPR002068), HSP20-like chaperone (InterPro:IPR008978); BEST Arabidopsis thaliana protein match is: heat shock protein 17.6A (TAIR:AT5G12030.1); Has 4491 Blast hits to 4491 proteins in 1181 species: Archae - 166; Bacteria - 2520; Metazoa - 2; Fungi - 140; Plants - 1242; Vir…	T
'20.2.1'	'stress.abiotic.heat'	'zm00001d020058'	'(at3g12580 : 129.0) heat shock protein 70 (HSP70); FUNCTIONS IN: ATP binding; INVOLVED IN: in 9 processes; LOCATED IN: cytosol, mitochondrion, cell wall, plasma membrane; EXPRESSED IN: 23 plant structures; EXPRESSED DURING: 11 growth stages; CONTAINS InterPro DOMAIN/s: Heat shock protein 70, conserved site (InterPro:IPR018181), Heat shock protein Hsp70 (InterPro:IPR001023), Heat shock protein 70…	T
'20.2.1'	'stress.abiotic.heat'	'zm00001d015050'	'(at3g12170 : 229.0) Chaperone DnaJ-domain superfamily protein; FUNCTIONS IN: unfolded protein binding, heat shock protein binding; INVOLVED IN: protein folding; LOCATED IN: cellular_component unknown; EXPRESSED IN: 24 plant structures; EXPRESSED DURING: 15 growth stages; CONTAINS InterPro DOMAIN/s: Molecular chaperone, heat shock protein, Hsp40, DnaJ (InterPro:IPR015609), Heat shock protein DnaJ…	T
'20.2.1'	'stress.abiotic.heat'	'novel00713'	'(at3g12170 : 121.0) Chaperone DnaJ-domain superfamily protein; FUNCTIONS IN: unfolded protein binding, heat shock protein binding; INVOLVED IN: protein folding; LOCATED IN: cellular_component unknown; EXPRESSED IN: 24 plant structures; EXPRESSED DURING: 15 growth stages; CONTAINS InterPro DOMAIN/s: Molecular chaperone, heat shock protein, Hsp40, DnaJ (InterPro:IPR015609), Heat shock protein DnaJ…	T
'20.2.2'	'stress.abiotic.cold'	'zm00001d053839'	'(at1g05260 : 166.0) Encodes a cold-inducible cationic peroxidase that is involved in the stress response. In response to low temperature, RCI3 transcripts accumulate in the aerial part and in roots of etiolated seedlings but only in roots of light-grown seedlings.; RARE COLD INDUCIBLE GENE 3 (RCI3); FUNCTIONS IN: peroxidase activity; INVOLVED IN: response to desiccation, response to cold, hypero…	T
'20.2.2'	'stress.abiotic.cold'	'zm00001d042993'	'(at3g55990 : 484.0) Encodes ESK1 (Eskimo1). A member of a large gene family of DUF231 domain proteins whose members encode a total of 45 proteins of unknown function. ESK1 functions as a negative regulator of cold acclimation. Mutations in the ESK1 gene provides strong freezing tolerance. A member of the TBL (TRICHOME BIREFRINGENCE-LIKE) gene family containing a plant-specific DUF231 (domain of …	T
'20.2.2'	'stress.abiotic.cold'	'zm00001d040705'	'(p37835|per2_orysa : 251.0) Peroxidase 2 precursor (EC 1.11.1.7) - Oryza sativa (Rice) & (at5g05340 : 250.0) Peroxidase superfamily protein; FUNCTIONS IN: protein binding, peroxidase activity; INVOLVED IN: response to oxidative stress, oxidation reduction; LOCATED IN: apoplast, cell wall; EXPRESSED IN: 9 plant structures; EXPRESSED DURING: LP.04 four leaves visible, 4 anthesis, C globular stage,…	T
'20.2.2'	'stress.abiotic.cold'	'zm00001d028751'	'(at3g55990 : 472.0) Encodes ESK1 (Eskimo1). A member of a large gene family of DUF231 domain proteins whose members encode a total of 45 proteins of unknown function. ESK1 functions as a negative regulator of cold acclimation. Mutations in the ESK1 gene provides strong freezing tolerance. A member of the TBL (TRICHOME BIREFRINGENCE-LIKE) gene family containing a plant-specific DUF231 (domain of …	T
'20.2.2'	'stress.abiotic.cold'	'zm00001d024752'	'(at1g05260 : 279.0) Encodes a cold-inducible cationic peroxidase that is involved in the stress response. In response to low temperature, RCI3 transcripts accumulate in the aerial part and in roots of etiolated seedlings but only in roots of light-grown seedlings.; RARE COLD INDUCIBLE GENE 3 (RCI3); FUNCTIONS IN: peroxidase activity; INVOLVED IN: response to desiccation, response to cold, hypero…	T
'20.2.2'	'stress.abiotic.cold'	'zm00001d019750'	'(at5g23950 : 156.0) Calcium-dependent lipid-binding (CaLB domain) family protein; CONTAINS InterPro DOMAIN/s: C2 calcium/lipid-binding domain, CaLB (InterPro:IPR008973), C2 calcium-dependent membrane targeting (InterPro:IPR000008); BEST Arabidopsis thaliana protein match is: Calcium-dependent lipid-binding (CaLB domain) family protein (TAIR:AT1G07310.1); Has 7173 Blast hits to 1801 proteins in 1…	T
'20.2.2'	'stress.abiotic.cold'	'zm00001d005315'	'(at5g23950 : 154.0) Calcium-dependent lipid-binding (CaLB domain) family protein; CONTAINS InterPro DOMAIN/s: C2 calcium/lipid-binding domain, CaLB (InterPro:IPR008973), C2 calcium-dependent membrane targeting (InterPro:IPR000008); BEST Arabidopsis thaliana protein match is: Calcium-dependent lipid-binding (CaLB domain) family protein (TAIR:AT1G07310.1); Has 7173 Blast hits to 1801 proteins in 1…	T
'20.2.3'	'stress.abiotic.drought/salt'	'zm00001d043538'	'(at5g25610 : 260.0) responsive to dehydration 22 (RD22) mediated by ABA; RESPONSIVE TO DESSICATION 22 (RD22); FUNCTIONS IN: nutrient reservoir activity; INVOLVED IN: response to desiccation, response to salt stress, response to abscisic acid stimulus; LOCATED IN: endomembrane system; EXPRESSED IN: 21 plant structures; EXPRESSED DURING: 13 growth stages; CONTAINS InterPro DOMAIN/s: BURP (InterPro…	T
'20.2.3'	'stress.abiotic.drought/salt'	'zm00001d032703'	'(at4g14360 : 762.0) S-adenosyl-L-methionine-dependent methyltransferases superfamily protein; CONTAINS InterPro DOMAIN/s: Protein of unknown function DUF248, methyltransferase putative (InterPro:IPR004159); BEST Arabidopsis thaliana protein match is: S-adenosyl-L-methionine-dependent methyltransferases superfamily protein (TAIR:AT3G23300.1); Has 35333 Blast hits to 34131 proteins in 2444 species…	T
'20.2.3'	'stress.abiotic.drought/salt'	'novel00556'	'(q8h5t6|lti6a_orysa : 113.0) Hydrophobic protein LTI6A (Low temperature-induced protein 6A) - Oryza sativa (Rice) & (at3g05890 : 90.9) RARE-COLD-INDUCIBLE 2B (RCI2B); CONTAINS InterPro DOMAIN/s: Uncharacterised protein family UPF0057 (InterPro:IPR000612); BEST Arabidopsis thaliana protein match is: Low temperature and salt responsive protein family (TAIR:AT3G05880.1); Has 1391 Blast hits to 1391…	T
'20.2.4'	'stress.abiotic.touch/wounding'	'zm00001d031934'	'(at1g19670 : 204.0) Chlorophyllase is the first enzyme involved in chlorophyll degradation. It catalyzes the hydrolysis of the ester bond to yield chlorophyllide and phytol. AtCLH1 lacks a typical signal sequence for the chloroplast. Its expression is induced rapidly by methyljasmonate, a known promoter of senescence and chlorophyll degradation.; chlorophyllase 1 (CLH1); FUNCTIONS IN: chlorophyl…	T
'20.2.99'	'stress.abiotic.unspecified'	'zm00001d029558'	'(q00008|prms_maize : 213.0) Pathogenesis-related protein PRMS precursor - Zea mays (Maize) & (at3g09590 : 169.0) CAP (Cysteine-rich secretory proteins, Antigen 5, and Pathogenesis-related 1 protein) superfamily protein; FUNCTIONS IN: molecular_function unknown; INVOLVED IN: biological_process unknown; LOCATED IN: endomembrane system, extracellular region; EXPRESSED IN: male gametophyte, pollen t…	T
'20.2.99'	'stress.abiotic.unspecified'	'zm00001d021730'	'(at1g11360 : 191.0) Adenine nucleotide alpha hydrolases-like superfamily protein; INVOLVED IN: response to stress; LOCATED IN: cytosol; EXPRESSED IN: 23 plant structures; EXPRESSED DURING: 13 growth stages; CONTAINS InterPro DOMAIN/s: UspA (InterPro:IPR006016), Rossmann-like alpha/beta/alpha sandwich fold (InterPro:IPR014729), Universal stress protein A (InterPro:IPR006015); BEST Arabidopsis tha…	T
'20.2.99'	'stress.abiotic.unspecified'	'zm00001d016697'	'(at3g10080 : 192.0) RmlC-like cupins superfamily protein; FUNCTIONS IN: manganese ion binding, nutrient reservoir activity; INVOLVED IN: biological_process unknown; LOCATED IN: endomembrane system, apoplast; EXPRESSED IN: 22 plant structures; EXPRESSED DURING: 13 growth stages; CONTAINS InterPro DOMAIN/s: Cupin, RmlC-type (InterPro:IPR011051), Cupin 1 (InterPro:IPR006045), RmlC-like jelly roll f…	T
'21.1.1'	'redox.thioredoxin.PDIL'	'zm00001d016786'	'(at1g35620 : 437.0) Encodes a protein disulfide isomerase-like (PDIL) protein, a member of a multigene family within the thioredoxin (TRX) superfamily. Unlike several other PDI family members, transcript levels for this gene are not up-regulated in response to three different chemical inducers of ER stress (dithiothreitol, beta-mercaptoethanol, and tunicamycin). However, the level of transcripts…	T
'21.1.1'	'redox.thioredoxin.PDIL'	'zm00001d015747'	'(p38661|pdia6_medsa : 174.0) Probable protein disulfide-isomerase A6 precursor (EC 5.3.4.1) (P5) - Medicago sativa (Alfalfa) & (at2g47470 : 169.0) Encodes a protein disulfide isomerase-like (PDIL) protein, a member of a multigene family within the thioredoxin (TRX) superfamily. Transcript levels for this gene are up-regulated in response to three different chemical inducers of ER stress (dithiot…	T
'21.2'	'redox.ascorbate and glutathione'	'zm00001d017380'	'(at3g48890 : 198.0) putative progesterone-binding protein homolog (Atmp2) mRNA,; membrane-associated progesterone binding protein 3 (MAPR3); FUNCTIONS IN: heme binding; LOCATED IN: chloroplast thylakoid membrane, nucleus; EXPRESSED IN: 24 plant structures; EXPRESSED DURING: 13 growth stages; CONTAINS InterPro DOMAIN/s: Cytochrome b5 (InterPro:IPR001199); BEST Arabidopsis thaliana protein match i…	T
'21.2'	'redox.ascorbate and glutathione'	'zm00001d002837'	'(at4g25570 : 209.0) Encodes cytochrome b561.; ACYB-2; FUNCTIONS IN: carbon-monoxide oxygenase activity; LOCATED IN: integral to membrane, chloroplast, vacuole; EXPRESSED IN: 23 plant structures; EXPRESSED DURING: 13 growth stages; CONTAINS InterPro DOMAIN/s: Cytochrome b561, eukaryote (InterPro:IPR004877), Cytochrome b561/ferric reductase transmembrane (InterPro:IPR006593); BEST Arabidopsis thal…	T
'21.2.1'	'redox.ascorbate and glutathione.ascorbate'	'zm00001d030685'	'(p93404|apx1_orysa : 246.0) L-ascorbate peroxidase 1, cytosolic (EC 1.11.1.11) (APXa) (OsAPx01) - Oryza sativa (Rice) & (at1g07890 : 234.0) Encodes a cytosolic ascorbate peroxidase APX1. Ascorbate peroxidases are enzymes that scavenge hydrogen peroxide in plant cells. Eight types of APX have been described for Arabidopsis: three cytosolic (APX1, APX2, APX6), two chloroplastic types (stromal sAPX…	T
'21.2.1'	'redox.ascorbate and glutathione.ascorbate'	'zm00001d016802'	'(q69sv0|apx8_orysa : 651.0) Probable L-ascorbate peroxidase 8, chloroplast precursor (EC 1.11.1.11) (OsAPx08) - Oryza sativa (Rice) & (at1g77490 : 521.0) Encodes a chloroplastic thylakoid ascorbate peroxidase tAPX. Ascorbate peroxidases are enzymes that scavenge hydrogen peroxide in plant cells. Eight types of APX have been described for Arabidopsis: three cytosolic (APX1, APX2, APX6), two chlor…	T
'21.2.2'	'redox.ascorbate and glutathione.glutathione'	'zm00001d026154'	'(at4g11600 : 288.0) Encodes glutathione peroxidase.; glutathione peroxidase 6 (GPX6); FUNCTIONS IN: glutathione peroxidase activity; INVOLVED IN: response to oxidative stress, response to cadmium ion, response to salt stress, response to metal ion; LOCATED IN: cytosol, mitochondrion, chloroplast, plasma membrane; EXPRESSED IN: 26 plant structures; EXPRESSED DURING: 14 growth stages; CONTAINS Int…	T
'21.4'	'redox.glutaredoxins'	'zm00001d023873'	'(at5g18600 : 124.0) Thioredoxin superfamily protein; FUNCTIONS IN: electron carrier activity, arsenate reductase (glutaredoxin) activity, protein disulfide oxidoreductase activity; INVOLVED IN: cell redox homeostasis; LOCATED IN: cellular_component unknown; EXPRESSED IN: 18 plant structures; EXPRESSED DURING: 10 growth stages; CONTAINS InterPro DOMAIN/s: Glutaredoxin-like, plant II (InterPro:IPR…	T
'21.4'	'redox.glutaredoxins'	'zm00001d023869'	'(at2g47870 : 123.0) Thioredoxin superfamily protein; FUNCTIONS IN: electron carrier activity, protein disulfide oxidoreductase activity; INVOLVED IN: cell redox homeostasis; LOCATED IN: endomembrane system; CONTAINS InterPro DOMAIN/s: Glutaredoxin-like, plant II (InterPro:IPR011905), Thioredoxin fold (InterPro:IPR012335), Glutaredoxin (InterPro:IPR002109), Thioredoxin-like fold (InterPro:IPR0123…	T
'21.6'	'redox.dismutases and catalases'	'zm00001d054044'	'(p18123|cata3_maize : 966.0) Catalase isozyme 3 (EC 1.11.1.6) - Zea mays (Maize) & (at1g20630 : 739.0) Catalyzes the reduction of hydrogen peroxide using heme group as cofactor. Protects cells from toxicity by H2O2.; catalase 1 (CAT1); FUNCTIONS IN: catalase activity, cobalt ion binding; INVOLVED IN: in 7 processes; LOCATED IN: mitochondrion, cytosolic ribosome, cell wall, peroxisome, chloroplas…	T
'22.1.3'	'polyamine metabolism.synthesis.arginine decarboxylase'	'zm00001d051194'	'(p22220|spe1_avesa : 787.0) Arginine decarboxylase (EC 4.1.1.19) (ARGDC) (ADC) - Avena sativa (Oat) & (at2g16500 : 506.0) encodes a arginine decarboxylase (ADC), a rate-limiting enzyme that catalyzes the first step of polyamine (PA) biosynthesis via ADC pathway in Arabidopsis thaliana. Arabidopsis genome has two ADC paralogs, ADC1 and ADC2. Double mutant analysis showed that ADC genes are essent…	T
'23.1.2.31'	'nucleotide metabolism.synthesis.purine.GMP synthetase'	'zm00001d026685'	'(at1g63660 : 809.0) GMP synthase (glutamine-hydrolyzing), putative / glutamine amidotransferase, putative; FUNCTIONS IN: asparagine synthase (glutamine-hydrolyzing) activity, GMP synthase (glutamine-hydrolyzing) activity, catalytic activity, ATP binding; INVOLVED IN: GMP biosynthetic process, glutamine metabolic process, biosynthetic process, asparagine biosynthetic process; EXPRESSED IN: 22 pla…	T
'23.1.3'	'nucleotide metabolism.synthesis.PRS-PP'	'zm00001d051634'	'(q6zft5|kprs4_orysa : 557.0) Ribose-phosphate pyrophosphokinase 4 (EC 2.7.6.1) (Phosphoribosyl pyrophosphate synthetase 4) - Oryza sativa (Rice) & (at2g42910 : 484.0) Phosphoribosyltransferase family protein; FUNCTIONS IN: magnesium ion binding, ribose phosphate diphosphokinase activity; INVOLVED IN: nucleotide biosynthetic process, nucleoside metabolic process; LOCATED IN: plasma membrane, cyto…	T
'23.4.1'	'nucleotide metabolism.phosphotransfer and pyrophosphatases.adenylate kinase'	'zm00001d041814'	'(at2g37250 : 203.0) encodes adenylate kinase that is located in the chloroplast involved in the coordination of metabolism and growth; adenosine kinase (ADK); CONTAINS InterPro DOMAIN/s: Adenylate kinase, subfamily (InterPro:IPR006259), Adenylate kinase (InterPro:IPR000850); BEST Arabidopsis thaliana protein match is: P-loop containing nucleoside triphosphate hydrolases superfamily protein (TAIR…	T
'23.4.3'	'nucleotide metabolism.phosphotransfer and pyrophosphatases.uridylate kinase'	'zm00001d035916'	'(at5g26667 : 246.0) encodes a uridine 5'-monophosphate (UMP)/cytidine 5'-monophosphate (CMP) kinase.; PYR6; FUNCTIONS IN: uridylate kinase activity, cytidylate kinase activity; INVOLVED IN: pyrimidine ribonucleoside monophosphate metabolic process; LOCATED IN: cellular_component unknown; EXPRESSED IN: male gametophyte, cultured cell; EXPRESSED DURING: seed development stages; CONTAINS InterPro D…	T
'24'	'Biodegradation of Xenobiotics'	'zm00001d020744'	'(at1g19190 : 200.0) alpha/beta-Hydrolases superfamily protein; FUNCTIONS IN: hydrolase activity; INVOLVED IN: metabolic process; LOCATED IN: cellular_component unknown; EXPRESSED IN: inflorescence meristem, root, flower; EXPRESSED DURING: petal differentiation and expansion stage; CONTAINS InterPro DOMAIN/s: Lipase, GDXG, active site (InterPro:IPR002168), Alpha/beta hydrolase fold-3 (InterPro:IP…	T
'24.2'	'Biodegradation of Xenobiotics.lactoylglutathione lyase'	'zm00001d015976'	'(at1g67280 : 474.0) Glyoxalase/Bleomycin resistance protein/Dioxygenase superfamily protein; FUNCTIONS IN: lactoylglutathione lyase activity, metal ion binding; INVOLVED IN: response to cold, carbohydrate metabolic process; LOCATED IN: thylakoid, stromule, chloroplast; EXPRESSED IN: 24 plant structures; EXPRESSED DURING: 14 growth stages; CONTAINS InterPro DOMAIN/s: Glyoxalase I (InterPro:IPR004…	T
'25'	'C1-metabolism'	'zm00001d023437'	'(o49954|gcsp_soltu : 1595.0) Glycine dehydrogenase [decarboxylating], mitochondrial precursor (EC 1.4.4.2) (Glycine decarboxylase) (Glycine cleavage system P-protein) - Solanum tuberosum (Potato) & (at2g26080 : 1593.0) glycine decarboxylase P-protein 2 (GLDP2); FUNCTIONS IN: glycine dehydrogenase (decarboxylating) activity, ATP binding; INVOLVED IN: oxidation reduction, glycine decarboxylation v…	T
'25'	'C1-metabolism'	'zm00001d004109'	'(at4g31120 : 186.0) Involved in vernalization. Required for epigenetic silencing of FLC, and for vernalization-mediated histone modification.; PROTEIN ARGININE METHYLTRANSFERASE 5 (PRMT5); FUNCTIONS IN: protein methyltransferase activity; INVOLVED IN: positive regulation of vernalization response, regulation of flower development; LOCATED IN: cytoplasm; EXPRESSED IN: 25 plant structures; EXPRESS…	T
'25.7'	'C1-metabolism.GTP cyclohydrolase I'	'zm00001d026531'	'(at3g07270 : 421.0) GTP cyclohydrolase I; CONTAINS InterPro DOMAIN/s: GTP cyclohydrolase I/Nitrile oxidoreductase (InterPro:IPR020602); Has 35333 Blast hits to 34131 proteins in 2444 species: Archae - 798; Bacteria - 22429; Metazoa - 974; Fungi - 991; Plants - 531; Viruses - 0; Other Eukaryotes - 9610 (source: NCBI BLink). & (reliability: 842.0) & (original description: no original description)'	T
'26.1'	'misc.misc2'	'zm00001d047710'	'(q852m2|aldo3_orysa : 291.0) Probable aldehyde oxidase 3 (EC 1.2.3.1) (AO-3) - Oryza sativa (Rice) & (at5g20960 : 163.0) Encodes aldehyde oxidase AA01.; aldehyde oxidase 1 (AAO1); CONTAINS InterPro DOMAIN/s: Aldehyde oxidase/xanthine dehydrogenase (InterPro:IPR016208), Ferredoxin (InterPro:IPR001041), Molybdopterin dehydrogenase, FAD-binding (InterPro:IPR002346), Beta-grasp fold, ferredoxin-type…	T
'26.1'	'misc.misc2'	'zm00001d015870'	'(at4g37550 : 280.0) Acetamidase/Formamidase family protein; FUNCTIONS IN: formamidase activity, hydrolase activity, acting on carbon-nitrogen (but not peptide) bonds, in linear amides; INVOLVED IN: metabolic process; EXPRESSED IN: 23 plant structures; EXPRESSED DURING: 13 growth stages; CONTAINS InterPro DOMAIN/s: Acetamidase/Formamidase (InterPro:IPR004304); BEST Arabidopsis thaliana protein ma…	T
'26.10'	'misc.cytochrome P450'	'zm00001d048819'	'(at5g36110 : 298.0) member of CYP716A; "cytochrome P450, family 716, subfamily A, polypeptide 1" (CYP716A1); FUNCTIONS IN: electron carrier activity, monooxygenase activity, iron ion binding, oxygen binding, heme binding; INVOLVED IN: oxidation reduction; LOCATED IN: endomembrane system; CONTAINS InterPro DOMAIN/s: Cytochrome P450 (InterPro:IPR001128), Cytochrome P450, conserved site (InterPro:I…	T
'26.10'	'misc.cytochrome P450'	'zm00001d044157'	'(at3g14690 : 539.0) putative cytochrome P450; "cytochrome P450, family 72, subfamily A, polypeptide 15" (CYP72A15); FUNCTIONS IN: electron carrier activity, monooxygenase activity, iron ion binding, oxygen binding, heme binding; INVOLVED IN: response to cyclopentenone; LOCATED IN: endomembrane system; EXPRESSED IN: 22 plant structures; EXPRESSED DURING: 13 growth stages; CONTAINS InterPro DOMAIN…	T
'26.10'	'misc.cytochrome P450'	'zm00001d044156'	'(at3g14680 : 504.0) putative cytochrome P450; "cytochrome P450, family 72, subfamily A, polypeptide 14" (CYP72A14); FUNCTIONS IN: electron carrier activity, monooxygenase activity, iron ion binding, oxygen binding, heme binding; INVOLVED IN: oxidation reduction; LOCATED IN: endomembrane system; EXPRESSED IN: hypocotyl, root; CONTAINS InterPro DOMAIN/s: Cytochrome P450 (InterPro:IPR001128), Cytoc…	T
'26.10'	'misc.cytochrome P450'	'zm00001d034095'	'(at5g57220 : 133.0) member of CYP81F, involved in glucosinolate metabolism. Mutants had impaired resistance to fungi.; "cytochrome P450, family 81, subfamily F, polypeptide 2" (CYP81F2); FUNCTIONS IN: electron carrier activity, monooxygenase activity, iron ion binding, oxygen binding, heme binding; INVOLVED IN: in 7 processes; LOCATED IN: endomembrane system; EXPRESSED IN: 8 plant structures; EX…	T
'26.10'	'misc.cytochrome P450'	'zm00001d033152'	'(o48923|c71da_soybn : 357.0) Cytochrome P450 71D10 (EC 1.14.-.-) - Glycine max (Soybean) & (at2g30750 : 296.0) putative cytochrome P450; cytochrome P450, family 71, subfamily A, polypeptide 12 (CYP71A12); FUNCTIONS IN: electron carrier activity, monooxygenase activity, iron ion binding, oxygen binding, heme binding; INVOLVED IN: response to bacterium; LOCATED IN: endomembrane system; EXPRESSED I…	T
'26.10'	'misc.cytochrome P450'	'zm00001d032458'	'(at2g12190 : 422.0) Cytochrome P450 superfamily protein; FUNCTIONS IN: electron carrier activity, monooxygenase activity, iron ion binding, oxygen binding, heme binding; INVOLVED IN: oxidation reduction; EXPRESSED IN: stem, leaf whorl, male gametophyte, flower, stamen; EXPRESSED DURING: 4 anthesis; CONTAINS InterPro DOMAIN/s: Cytochrome P450 (InterPro:IPR001128), Cytochrome P450, conserved site …	T
'26.10'	'misc.cytochrome P450'	'zm00001d032090'	'(q05001|ncpr_catro : 300.0) NADPH--cytochrome P450 reductase (EC 1.6.2.4) (CPR) (P450R) - Catharanthus roseus (Rosy periwinkle) (Madagascar periwinkle) & (at4g30210 : 291.0) Encodes NADPH-cytochrome P450 reductase that catalyzes the first oxidative step of the phenylpropanoid general pathway.; P450 reductase 2 (ATR2); FUNCTIONS IN: NADPH-hemoprotein reductase activity; INVOLVED IN: phenylpropano…	T
'26.10'	'misc.cytochrome P450'	'zm00001d020717'	'(at3g19270 : 555.0) Encodes a protein with ABA 8'-hydroxylase activity, involved in ABA catabolism. Member of the CYP707A gene family.; "cytochrome P450, family 707, subfamily A, polypeptide 4" (CYP707A4); CONTAINS InterPro DOMAIN/s: Cytochrome P450 (InterPro:IPR001128), Cytochrome P450, E-class, group I (InterPro:IPR002401), Cytochrome P450, conserved site (InterPro:IPR017972); BEST Arabidopsis…	T
'26.10'	'misc.cytochrome P450'	'zm00001d014958'	'(at1g64900 : 355.0) Encodes cytochrome P450 (CYP89A2).; "cytochrome P450, family 89, subfamily A, polypeptide 2" (CYP89A2); FUNCTIONS IN: electron carrier activity, monooxygenase activity, iron ion binding, oxygen binding, heme binding; INVOLVED IN: oxidation reduction; EXPRESSED IN: 20 plant structures; EXPRESSED DURING: 13 growth stages; CONTAINS InterPro DOMAIN/s: Cytochrome P450 (InterPro:IP…	T
'26.10'	'misc.cytochrome P450'	'zm00001d014134'	'(o48923|c71da_soybn : 397.0) Cytochrome P450 71D10 (EC 1.14.-.-) - Glycine max (Soybean) & (at5g25180 : 341.0) putative cytochrome P450; "cytochrome P450, family 71, subfamily B, polypeptide 14" (CYP71B14); FUNCTIONS IN: electron carrier activity, monooxygenase activity, iron ion binding, oxygen binding, heme binding; INVOLVED IN: oxidation reduction; LOCATED IN: cellular_component unknown; EXPR…	T
'26.10'	'misc.cytochrome P450'	'zm00001d013231'	'(at5g10600 : 143.0) member of CYP81K; "cytochrome P450, family 81, subfamily K, polypeptide 2" (CYP81K2); FUNCTIONS IN: electron carrier activity, monooxygenase activity, iron ion binding, oxygen binding, heme binding; INVOLVED IN: oxidation reduction; CONTAINS InterPro DOMAIN/s: Cytochrome P450 (InterPro:IPR001128), Cytochrome P450, E-class, group I (InterPro:IPR002401), Cytochrome P450, conser…	T
'26.10'	'misc.cytochrome P450'	'zm00001d012322'	'(at4g37370 : 360.0) member of CYP81D; "cytochrome P450, family 81, subfamily D, polypeptide 8" (CYP81D8); FUNCTIONS IN: electron carrier activity, monooxygenase activity, iron ion binding, oxygen binding, heme binding; INVOLVED IN: response to karrikin; LOCATED IN: endoplasmic reticulum, plasma membrane; EXPRESSED IN: 20 plant structures; EXPRESSED DURING: 13 growth stages; CONTAINS InterPro DOM…	T
'26.10'	'misc.cytochrome P450'	'zm00001d012304'	'(at2g27690 : 308.0) Encodes a CYP94C1. Has highest omega-hydroxylase activity with 9,10-epoxystearic acid, while also metabolized lauric acid (C12:0) and C18 unsaturated fatty acids. Gene expression is induced in response to wounding and jasmonic acid treatment.; "cytochrome P450, family 94, subfamily C, polypeptide 1" (CYP94C1); CONTAINS InterPro DOMAIN/s: Cytochrome P450 (InterPro:IPR001128), …	T
'26.10'	'misc.cytochrome P450'	'zm00001d002937'	'(at3g14690 : 472.0) putative cytochrome P450; "cytochrome P450, family 72, subfamily A, polypeptide 15" (CYP72A15); FUNCTIONS IN: electron carrier activity, monooxygenase activity, iron ion binding, oxygen binding, heme binding; INVOLVED IN: response to cyclopentenone; LOCATED IN: endomembrane system; EXPRESSED IN: 22 plant structures; EXPRESSED DURING: 13 growth stages; CONTAINS InterPro DOMAIN…	T
'26.12'	'misc.peroxidases'	'zm00001d053839'	'(at1g05260 : 166.0) Encodes a cold-inducible cationic peroxidase that is involved in the stress response. In response to low temperature, RCI3 transcripts accumulate in the aerial part and in roots of etiolated seedlings but only in roots of light-grown seedlings.; RARE COLD INDUCIBLE GENE 3 (RCI3); FUNCTIONS IN: peroxidase activity; INVOLVED IN: response to desiccation, response to cold, hypero…	T
'26.12'	'misc.peroxidases'	'zm00001d040705'	'(p37835|per2_orysa : 251.0) Peroxidase 2 precursor (EC 1.11.1.7) - Oryza sativa (Rice) & (at5g05340 : 250.0) Peroxidase superfamily protein; FUNCTIONS IN: protein binding, peroxidase activity; INVOLVED IN: response to oxidative stress, oxidation reduction; LOCATED IN: apoplast, cell wall; EXPRESSED IN: 9 plant structures; EXPRESSED DURING: LP.04 four leaves visible, 4 anthesis, C globular stage,…	T
'26.12'	'misc.peroxidases'	'zm00001d024752'	'(at1g05260 : 279.0) Encodes a cold-inducible cationic peroxidase that is involved in the stress response. In response to low temperature, RCI3 transcripts accumulate in the aerial part and in roots of etiolated seedlings but only in roots of light-grown seedlings.; RARE COLD INDUCIBLE GENE 3 (RCI3); FUNCTIONS IN: peroxidase activity; INVOLVED IN: response to desiccation, response to cold, hypero…	T
'26.12'	'misc.peroxidases'	'zm00001d009373'	'(at5g66390 : 476.0) Peroxidase superfamily protein; FUNCTIONS IN: peroxidase activity, heme binding; INVOLVED IN: response to oxidative stress, oxidation reduction; LOCATED IN: endomembrane system; EXPRESSED IN: leaf apex, hypocotyl, root, flower; EXPRESSED DURING: 4 anthesis, petal differentiation and expansion stage; CONTAINS InterPro DOMAIN/s: Haem peroxidase (InterPro:IPR010255), Plant perox…	T
'26.13'	'misc.acid and other phosphatases'	'zm00001d029247'	'(at4g14280 : 469.0) ARM repeat superfamily protein; FUNCTIONS IN: binding; INVOLVED IN: biological_process unknown; LOCATED IN: cellular_component unknown; CONTAINS InterPro DOMAIN/s: Armadillo-like helical (InterPro:IPR011989), Armadillo-type fold (InterPro:IPR016024); BEST Arabidopsis thaliana protein match is: ARM repeat superfamily protein (TAIR:AT5G18980.1); Has 563 Blast hits to 446 protei…	T
'26.13'	'misc.acid and other phosphatases'	'zm00001d029246'	'(at5g18980 : 568.0) ARM repeat superfamily protein; FUNCTIONS IN: binding; INVOLVED IN: biological_process unknown; LOCATED IN: cellular_component unknown; CONTAINS InterPro DOMAIN/s: Armadillo-like helical (InterPro:IPR011989), Armadillo (InterPro:IPR000225), Armadillo-type fold (InterPro:IPR016024); BEST Arabidopsis thaliana protein match is: ARM repeat superfamily protein (TAIR:AT3G06210.1); …	T
'26.13'	'misc.acid and other phosphatases'	'zm00001d010373'	'(at4g25150 : 205.0) HAD superfamily, subfamily IIIB acid phosphatase ; FUNCTIONS IN: acid phosphatase activity; INVOLVED IN: biological_process unknown; LOCATED IN: endomembrane system; EXPRESSED IN: 21 plant structures; EXPRESSED DURING: 9 growth stages; CONTAINS InterPro DOMAIN/s: Acid phosphatase (Class B) (InterPro:IPR005519), Vegetative storage protein/acid phosphatase (InterPro:IPR014403),…	T
'26.16'	'misc.myrosinases-lectin-jacalin'	'zm00001d038651'	'(at1g19715 : 518.0) Mannose-binding lectin superfamily protein; FUNCTIONS IN: molecular_function unknown; INVOLVED IN: biological_process unknown; LOCATED IN: cellular_component unknown; EXPRESSED IN: 22 plant structures; EXPRESSED DURING: 13 growth stages; CONTAINS InterPro DOMAIN/s: Mannose-binding lectin (InterPro:IPR001229); BEST Arabidopsis thaliana protein match is: Mannose-binding lectin …	T
'26.19'	'misc.plastocyanin-like'	'zm00001d033711'	'(p60496|babl_lillo : 149.0) Chemocyanin precursor (Basic blue protein) (Plantacyanin) - Lilium longiflorum (Trumpet lily) & (at2g02850 : 134.0) Encodes plantacyanin one of blue copper proteins. Involved in anther development and pollination. Expressed in the transmitting tract of the pistil.; plantacyanin (ARPN); FUNCTIONS IN: electron carrier activity, copper ion binding; INVOLVED IN: pollinati…	T
'26.19'	'misc.plastocyanin-like'	'zm00001d031257'	'(q41001|bcp_pea : 97.8) Blue copper protein precursor - Pisum sativum (Garden pea) & (at2g32300 : 90.5) Encodes a uclacyanin, a protein precursor that is closely related to precursors of stellacyanins and a blue copper protein from pea pods.; uclacyanin 1 (UCC1); FUNCTIONS IN: electron carrier activity, copper ion binding; LOCATED IN: anchored to membrane; EXPRESSED IN: 7 plant structures; EXPRE…	T
'26.19'	'misc.plastocyanin-like'	'zm00001d020794'	'(q41001|bcp_pea : 120.0) Blue copper protein precursor - Pisum sativum (Garden pea) & (at1g72230 : 103.0) Cupredoxin superfamily protein; FUNCTIONS IN: electron carrier activity, copper ion binding; LOCATED IN: anchored to membrane; EXPRESSED IN: 17 plant structures; EXPRESSED DURING: 9 growth stages; CONTAINS InterPro DOMAIN/s: Plastocyanin-like (InterPro:IPR003245), Cupredoxin (InterPro:IPR008…	T
'26.2'	'misc.UDP glucosyl and glucoronyl transferases'	'zm00001d052813'	'(at1g73880 : 218.0) UDP-glucosyl transferase 89B1 (UGT89B1); FUNCTIONS IN: in 7 functions; INVOLVED IN: metabolic process; LOCATED IN: cellular_component unknown; CONTAINS InterPro DOMAIN/s: UDP-glucuronosyl/UDP-glucosyltransferase (InterPro:IPR002213); BEST Arabidopsis thaliana protein match is: UDP-Glycosyltransferase superfamily protein (TAIR:AT1G51210.1); Has 6052 Blast hits to 5982 proteins…	T
'26.2'	'misc.UDP glucosyl and glucoronyl transferases'	'zm00001d051681'	'(at4g37690 : 434.0) Galactosyl transferase GMA12/MNN10 family protein; CONTAINS InterPro DOMAIN/s: Galactosyl transferase (InterPro:IPR008630); BEST Arabidopsis thaliana protein match is: Galactosyl transferase GMA12/MNN10 family protein (TAIR:AT2G22900.1); Has 507 Blast hits to 506 proteins in 109 species: Archae - 0; Bacteria - 4; Metazoa - 0; Fungi - 185; Plants - 285; Viruses - 4; Other Euka…	T
'26.2'	'misc.UDP glucosyl and glucoronyl transferases'	'zm00001d047801'	'(at5g15050 : 397.0) Core-2/I-branching beta-1,6-N-acetylglucosaminyltransferase family protein; FUNCTIONS IN: transferase activity, transferring glycosyl groups, acetylglucosaminyltransferase activity; INVOLVED IN: carbohydrate biosynthetic process; LOCATED IN: membrane; EXPRESSED IN: 23 plant structures; EXPRESSED DURING: 13 growth stages; CONTAINS InterPro DOMAIN/s: Glycosyl transferase, famil…	T
'26.2'	'misc.UDP glucosyl and glucoronyl transferases'	'zm00001d042514'	'(at1g18580 : 262.0) Encodes a protein with putative galacturonosyltransferase activity.; galacturonosyltransferase 11 (GAUT11); FUNCTIONS IN: polygalacturonate 4-alpha-galacturonosyltransferase activity; LOCATED IN: mitochondrion; EXPRESSED IN: 19 plant structures; EXPRESSED DURING: 12 growth stages; CONTAINS InterPro DOMAIN/s: Glycosyl transferase, family 8 (InterPro:IPR002495); BEST Arabidopsi…	T
'26.2'	'misc.UDP glucosyl and glucoronyl transferases'	'zm00001d032866'	'(at2g36970 : 538.0) UDP-Glycosyltransferase superfamily protein; FUNCTIONS IN: UDP-glycosyltransferase activity, transferase activity, transferring glycosyl groups; INVOLVED IN: metabolic process; LOCATED IN: endomembrane system; EXPRESSED IN: 20 plant structures; EXPRESSED DURING: 13 growth stages; CONTAINS InterPro DOMAIN/s: UDP-glucuronosyl/UDP-glucosyltransferase (InterPro:IPR002213); BEST A…	T
'26.2'	'misc.UDP glucosyl and glucoronyl transferases'	'zm00001d032222'	'(at1g22360 : 535.0) UDP-glucosyl transferase 85A2 (UGT85A2); FUNCTIONS IN: UDP-glycosyltransferase activity, transferase activity, transferring glycosyl groups, glucuronosyltransferase activity; INVOLVED IN: metabolic process; LOCATED IN: cellular_component unknown; EXPRESSED IN: 21 plant structures; EXPRESSED DURING: 11 growth stages; CONTAINS InterPro DOMAIN/s: UDP-glucuronosyl/UDP-glucosyltra…	T
'26.2'	'misc.UDP glucosyl and glucoronyl transferases'	'zm00001d024476'	'(at1g22370 : 267.0) UDP-glucosyl transferase 85A5 (UGT85A5); FUNCTIONS IN: transferase activity, transferring glycosyl groups, glucuronosyltransferase activity; INVOLVED IN: metabolic process; EXPRESSED IN: 15 plant structures; EXPRESSED DURING: 9 growth stages; CONTAINS InterPro DOMAIN/s: UDP-glucuronosyl/UDP-glucosyltransferase (InterPro:IPR002213); BEST Arabidopsis thaliana protein match is: …	T
'26.2'	'misc.UDP glucosyl and glucoronyl transferases'	'zm00001d016896'	'(at1g22400 : 406.0) UGT85A1; FUNCTIONS IN: in 6 functions; INVOLVED IN: metabolic process; LOCATED IN: cellular_component unknown; EXPRESSED IN: 22 plant structures; EXPRESSED DURING: 10 growth stages; CONTAINS InterPro DOMAIN/s: UDP-glucuronosyl/UDP-glucosyltransferase (InterPro:IPR002213); BEST Arabidopsis thaliana protein match is: UDP-glucosyl transferase 85A3 (TAIR:AT1G22380.1); Has 7940 Bl…	T
'26.2'	'misc.UDP glucosyl and glucoronyl transferases'	'zm00001d016435'	'(at3g53150 : 179.0) UDP-glucosyl transferase 73D1 (UGT73D1); FUNCTIONS IN: transferase activity, transferring hexosyl groups, UDP-glycosyltransferase activity; INVOLVED IN: metabolic process; LOCATED IN: endomembrane system; EXPRESSED IN: stem, sepal, stamen; EXPRESSED DURING: 4 anthesis; CONTAINS InterPro DOMAIN/s: UDP-glucuronosyl/UDP-glucosyltransferase (InterPro:IPR002213); BEST Arabidopsis …	T
'26.2'	'misc.UDP glucosyl and glucoronyl transferases'	'zm00001d016429'	'(at2g36780 : 129.0) UDP-Glycosyltransferase superfamily protein; FUNCTIONS IN: UDP-glycosyltransferase activity, transferase activity, transferring glycosyl groups; INVOLVED IN: metabolic process; LOCATED IN: cellular_component unknown; CONTAINS InterPro DOMAIN/s: UDP-glucuronosyl/UDP-glucosyltransferase (InterPro:IPR002213); BEST Arabidopsis thaliana protein match is: UDP-Glycosyltransferase su…	T
'26.2'	'misc.UDP glucosyl and glucoronyl transferases'	'zm00001d016424'	'(at2g36790 : 87.0) The At2g36790 gene encodes a UDP-glucose:flavonol-3-O-glycoside-7-O-glucosyltransferase (UGT73C6)attaching a glucosyl residue to the 7-O-position of the flavonols kaempferol, quercetin and their 3-O-glycoside derivatives.; UDP-glucosyl transferase 73C6 (UGT73C6); CONTAINS InterPro DOMAIN/s: UDP-glucuronosyl/UDP-glucosyltransferase (InterPro:IPR002213); BEST Arabidopsis thalian…	T
'26.2'	'misc.UDP glucosyl and glucoronyl transferases'	'zm00001d016417'	'(at2g36780 : 177.0) UDP-Glycosyltransferase superfamily protein; FUNCTIONS IN: UDP-glycosyltransferase activity, transferase activity, transferring glycosyl groups; INVOLVED IN: metabolic process; LOCATED IN: cellular_component unknown; CONTAINS InterPro DOMAIN/s: UDP-glucuronosyl/UDP-glucosyltransferase (InterPro:IPR002213); BEST Arabidopsis thaliana protein match is: UDP-Glycosyltransferase su…	T
'26.2'	'misc.UDP glucosyl and glucoronyl transferases'	'zm00001d015623'	'(at4g15490 : 318.0) Encodes a protein that might have sinapic acid:UDP-glucose glucosyltransferase activity.; UGT84A3; FUNCTIONS IN: UDP-glycosyltransferase activity, sinapate 1-glucosyltransferase activity, transferase activity, transferring glycosyl groups; INVOLVED IN: metabolic process; LOCATED IN: cellular_component unknown; EXPRESSED IN: 23 plant structures; EXPRESSED DURING: 14 growth sta…	T
'26.2'	'misc.UDP glucosyl and glucoronyl transferases'	'zm00001d013052'	'(at5g62620 : 797.0) Galactosyltransferase family protein; FUNCTIONS IN: transferase activity, transferring hexosyl groups, sugar binding, galactosyltransferase activity; INVOLVED IN: protein amino acid glycosylation; EXPRESSED IN: 22 plant structures; EXPRESSED DURING: 13 growth stages; CONTAINS InterPro DOMAIN/s: Galectin, carbohydrate recognition domain (InterPro:IPR001079), Glycosyl transfera…	T
'26.2'	'misc.UDP glucosyl and glucoronyl transferases'	'zm00001d012335'	'(q8rxa5|czog2_maize : 808.0) Cis-zeatin O-glucosyltransferase 2 (EC 2.4.1.215) (cisZOG2) - Zea mays (Maize) & (at2g15490 : 157.0) UDP-glycosyltransferase 73B4 (UGT73B4); FUNCTIONS IN: quercetin 3-O-glucosyltransferase activity, UDP-glycosyltransferase activity, quercetin 7-O-glucosyltransferase activity, UDP-glucosyltransferase activity, transferase activity, transferring glycosyl groups; INVOLV…	T
'26.2'	'misc.UDP glucosyl and glucoronyl transferases'	'zm00001d007869'	'(at1g07250 : 189.0) UDP-glucosyl transferase 71C4 (UGT71C4); FUNCTIONS IN: quercetin 3-O-glucosyltransferase activity, quercetin 7-O-glucosyltransferase activity, UDP-glucosyltransferase activity, transferase activity, transferring glycosyl groups; INVOLVED IN: metabolic process; LOCATED IN: cellular_component unknown; EXPRESSED IN: 22 plant structures; EXPRESSED DURING: 13 growth stages; CONTAI…	T
'26.2'	'misc.UDP glucosyl and glucoronyl transferases'	'zm00001d004366'	'(at1g05680 : 315.0) Encodes a UDP-glucosyltransferase, UGT74E2, that acts on IBA (indole-3-butyric acid) and affects auxin homeostasis. The transcript and protein levels of this enzyme are strongly induced by H2O2 and may allow integration of ROS (reactive oxygen species) and auxin signaling. This enzyme can also transfer glycosyl groups to several compounds related to the explosive TNT when thi…	T
'26.2'	'misc.UDP glucosyl and glucoronyl transferases'	'zm00001d002970'	'(at3g22250 : 369.0) UDP-Glycosyltransferase superfamily protein; FUNCTIONS IN: UDP-glycosyltransferase activity, transferase activity, transferring glycosyl groups; INVOLVED IN: metabolic process; EXPRESSED IN: pedicel; EXPRESSED DURING: 4 anthesis; CONTAINS InterPro DOMAIN/s: UDP-glucuronosyl/UDP-glucosyltransferase (InterPro:IPR002213); BEST Arabidopsis thaliana protein match is: UDP-Glycosylt…	T
'26.2'	'misc.UDP glucosyl and glucoronyl transferases'	'zm00001d002753'	'(at3g11340 : 120.0) UDP-Glycosyltransferase superfamily protein; FUNCTIONS IN: transferase activity, transferring hexosyl groups, UDP-glycosyltransferase activity; INVOLVED IN: metabolic process; LOCATED IN: endomembrane system; EXPRESSED IN: 8 plant structures; EXPRESSED DURING: 4 anthesis, LP.02 two leaves visible, petal differentiation and expansion stage; CONTAINS InterPro DOMAIN/s: UDP-gluc…	T
'26.21'	'misc.protease inhibitor/seed storage/lipid transfer protein (LTP) family protein'	'zm00001d038911'	'(at3g18280 : 89.7) Bifunctional inhibitor/lipid-transfer protein/seed storage 2S albumin superfamily protein; FUNCTIONS IN: lipid binding; INVOLVED IN: lipid transport; LOCATED IN: endomembrane system; EXPRESSED IN: 21 plant structures; EXPRESSED DURING: 13 growth stages; CONTAINS InterPro DOMAIN/s: Bifunctional inhibitor/plant lipid transfer protein/seed storage (InterPro:IPR016140), Plant lipi…	T
'26.21'	'misc.protease inhibitor/seed storage/lipid transfer protein (LTP) family protein'	'zm00001d003760'	'(at5g05960 : 112.0) Bifunctional inhibitor/lipid-transfer protein/seed storage 2S albumin superfamily protein; FUNCTIONS IN: lipid binding; INVOLVED IN: lipid transport; LOCATED IN: endomembrane system; EXPRESSED IN: 18 plant structures; EXPRESSED DURING: 10 growth stages; CONTAINS InterPro DOMAIN/s: Bifunctional inhibitor/plant lipid transfer protein/seed storage (InterPro:IPR016140), Plant lip…	T
'26.21'	'misc.protease inhibitor/seed storage/lipid transfer protein (LTP) family protein'	'zm00001d003757'	'(at5g05960 : 132.0) Bifunctional inhibitor/lipid-transfer protein/seed storage 2S albumin superfamily protein; FUNCTIONS IN: lipid binding; INVOLVED IN: lipid transport; LOCATED IN: endomembrane system; EXPRESSED IN: 18 plant structures; EXPRESSED DURING: 10 growth stages; CONTAINS InterPro DOMAIN/s: Bifunctional inhibitor/plant lipid transfer protein/seed storage (InterPro:IPR016140), Plant lip…	T
'26.22'	'misc.short chain dehydrogenase/reductase (SDR)'	'zm00001d050775'	'(at1g10310 : 252.0) encodes a NADPH-dependent pterin aldehyde reductase that accepts pterin aldehyde as well as dihydropterin aldehyde as substrates involved in metabolism and salvage of folate and its derivatives.; NAD(P)-binding Rossmann-fold superfamily protein; CONTAINS InterPro DOMAIN/s: Short-chain dehydrogenase/reductase, conserved site (InterPro:IPR020904), NAD(P)-binding domain (InterPr…	T
'26.22'	'misc.short chain dehydrogenase/reductase (SDR)'	'zm00001d028806'	'(p50160|ts2_maize : 533.0) Sex determination protein tasselseed-2 - Zea mays (Maize) & (at3g51680 : 290.0) NAD(P)-binding Rossmann-fold superfamily protein; FUNCTIONS IN: oxidoreductase activity, binding, catalytic activity; INVOLVED IN: oxidation reduction, metabolic process; LOCATED IN: cellular_component unknown; EXPRESSED IN: cotyledon, root; CONTAINS InterPro DOMAIN/s: NAD(P)-binding domain…	T
'26.22'	'misc.short chain dehydrogenase/reductase (SDR)'	'zm00001d025923'	'(at1g01800 : 231.0) NAD(P)-binding Rossmann-fold superfamily protein; FUNCTIONS IN: oxidoreductase activity, binding, catalytic activity; INVOLVED IN: oxidation reduction, metabolic process; LOCATED IN: plant-type cell wall; EXPRESSED IN: 22 plant structures; EXPRESSED DURING: 13 growth stages; CONTAINS InterPro DOMAIN/s: NAD(P)-binding domain (InterPro:IPR016040), Glucose/ribitol dehydrogenase …	T
'26.22'	'misc.short chain dehydrogenase/reductase (SDR)'	'zm00001d003174'	'(at3g59710 : 246.0) NAD(P)-binding Rossmann-fold superfamily protein; FUNCTIONS IN: oxidoreductase activity, binding, catalytic activity; INVOLVED IN: oxidation reduction, metabolic process; LOCATED IN: endomembrane system; EXPRESSED IN: leaf lamina base, root, carpel; EXPRESSED DURING: 4 anthesis; CONTAINS InterPro DOMAIN/s: NAD(P)-binding domain (InterPro:IPR016040), Glucose/ribitol dehydrogen…	T
'26.23'	'misc.rhodanese'	'zm00001d021245'	'(at4g27700 : 261.0) Rhodanese/Cell cycle control phosphatase superfamily protein; FUNCTIONS IN: molecular_function unknown; INVOLVED IN: aging; LOCATED IN: chloroplast thylakoid membrane, chloroplast; EXPRESSED IN: 21 plant structures; EXPRESSED DURING: 13 growth stages; CONTAINS InterPro DOMAIN/s: Rhodanese-like (InterPro:IPR001763); BEST Arabidopsis thaliana protein match is: Rhodanese/Cell cy…	T
'26.24'	'misc.GCN5-related N-acetyltransferase'	'zm00001d034417'	'(at2g32030 : 162.0) Acyl-CoA N-acyltransferases (NAT) superfamily protein; FUNCTIONS IN: N-acetyltransferase activity; INVOLVED IN: metabolic process; LOCATED IN: cellular_component unknown; EXPRESSED IN: 12 plant structures; EXPRESSED DURING: 8 growth stages; CONTAINS InterPro DOMAIN/s: GCN5-related N-acetyltransferase, C-terminal (InterPro:IPR022610), GCN5-related N-acetyltransferase (InterPro…	T
'26.26.1'	'misc.aminotransferases.aminotransferase class IV family protein'	'zm00001d016006'	'(at5g57850 : 422.0) D-aminoacid aminotransferase-like PLP-dependent enzymes superfamily protein; FUNCTIONS IN: 4-amino-4-deoxychorismate lyase activity, catalytic activity; INVOLVED IN: tetrahydrofolate biosynthetic process; LOCATED IN: chloroplast; EXPRESSED IN: 24 plant structures; EXPRESSED DURING: 15 growth stages; CONTAINS InterPro DOMAIN/s: Aminotransferase, class IV (InterPro:IPR001544); …	T
'26.28'	'misc.GDSL-motif lipase'	'zm00001d040733'	'(at1g09390 : 388.0) GDSL-like Lipase/Acylhydrolase superfamily protein; FUNCTIONS IN: hydrolase activity, acting on ester bonds, carboxylesterase activity; INVOLVED IN: glycerol biosynthetic process, lipid metabolic process; LOCATED IN: chloroplast stroma; EXPRESSED IN: 22 plant structures; EXPRESSED DURING: 13 growth stages; CONTAINS InterPro DOMAIN/s: Lipase, GDSL (InterPro:IPR001087); BEST Ar…	T
'26.28'	'misc.GDSL-motif lipase'	'zm00001d038143'	'(at1g54790 : 256.0) GDSL-like Lipase/Acylhydrolase superfamily protein; FUNCTIONS IN: hydrolase activity, acting on ester bonds, carboxylesterase activity; INVOLVED IN: lipid metabolic process; LOCATED IN: endomembrane system; EXPRESSED IN: 16 plant structures; EXPRESSED DURING: 8 growth stages; CONTAINS InterPro DOMAIN/s: Lipase, GDSL (InterPro:IPR001087); BEST Arabidopsis thaliana protein matc…	T
'26.28'	'misc.GDSL-motif lipase'	'zm00001d037828'	'(at1g28580 : 212.0) GDSL-like Lipase/Acylhydrolase superfamily protein; FUNCTIONS IN: lipase activity, hydrolase activity, acting on ester bonds, carboxylesterase activity; INVOLVED IN: lipid metabolic process; LOCATED IN: vacuole; EXPRESSED IN: 22 plant structures; EXPRESSED DURING: 13 growth stages; CONTAINS InterPro DOMAIN/s: Lipase, GDSL (InterPro:IPR001087); BEST Arabidopsis thaliana protei…	T
'26.28'	'misc.GDSL-motif lipase'	'zm00001d036175'	'(at3g16370 : 325.0) GDSL-like Lipase/Acylhydrolase superfamily protein; FUNCTIONS IN: hydrolase activity, acting on ester bonds, carboxylesterase activity; INVOLVED IN: lipid metabolic process; LOCATED IN: apoplast; EXPRESSED IN: 22 plant structures; EXPRESSED DURING: 14 growth stages; CONTAINS InterPro DOMAIN/s: Lipase, GDSL (InterPro:IPR001087); BEST Arabidopsis thaliana protein match is: GDSL…	T
'26.28'	'misc.GDSL-motif lipase'	'zm00001d033079'	'(at5g55050 : 219.0) GDSL-like Lipase/Acylhydrolase superfamily protein; FUNCTIONS IN: hydrolase activity, acting on ester bonds, lipase activity, carboxylesterase activity; INVOLVED IN: lipid metabolic process; LOCATED IN: endomembrane system; EXPRESSED IN: 17 plant structures; EXPRESSED DURING: 10 growth stages; CONTAINS InterPro DOMAIN/s: Lipase, GDSL, active site (InterPro:IPR008265), Lipase,…	T
'26.28'	'misc.GDSL-motif lipase'	'zm00001d001800'	'(at3g11210 : 268.0) SGNH hydrolase-type esterase superfamily protein; FUNCTIONS IN: hydrolase activity, hydrolase activity, acting on ester bonds, carboxylesterase activity; INVOLVED IN: lipid metabolic process; LOCATED IN: cellular_component unknown; EXPRESSED IN: 20 plant structures; EXPRESSED DURING: 12 growth stages; CONTAINS InterPro DOMAIN/s: Esterase, SGNH hydrolase-type, subgroup (InterP…	T
'26.3'	'misc.gluco-, galacto- and mannosidases'	'zm00001d033649'	'(at3g18080 : 334.0) B-S glucosidase 44 (BGLU44); FUNCTIONS IN: in 6 functions; INVOLVED IN: carbohydrate metabolic process; LOCATED IN: cytosolic ribosome, cell wall, plant-type cell wall; EXPRESSED IN: 22 plant structures; EXPRESSED DURING: 13 growth stages; CONTAINS InterPro DOMAIN/s: Glycoside hydrolase, family 1 (InterPro:IPR001360), Glycoside hydrolase, catalytic core (InterPro:IPR017853), …	T
'26.3'	'misc.gluco-, galacto- and mannosidases'	'zm00001d024037'	'(p49235|bglc_maize : 1009.0) Beta-glucosidase, chloroplast precursor (EC 3.2.1.21) (Gentiobiase) (Cellobiase) (Beta-D-glucoside glucohydrolase) - Zea mays (Maize) & (at2g44450 : 483.0) beta glucosidase 15 (BGLU15); FUNCTIONS IN: cation binding, hydrolase activity, hydrolyzing O-glycosyl compounds, catalytic activity; INVOLVED IN: carbohydrate metabolic process; LOCATED IN: cell wall, plant-type …	T
'26.3'	'misc.gluco-, galacto- and mannosidases'	'zm00001d012159'	'(at5g36890 : 419.0) beta glucosidase 42 (BGLU42); FUNCTIONS IN: cation binding, beta-glucosidase activity, hydrolase activity, hydrolyzing O-glycosyl compounds, catalytic activity; INVOLVED IN: cellulose catabolic process, carbohydrate metabolic process; EXPRESSED IN: 23 plant structures; EXPRESSED DURING: 13 growth stages; CONTAINS InterPro DOMAIN/s: Glycoside hydrolase, family 1, beta-glucosid…	T
'26.4'	'misc.beta 1,3 glucan hydrolases'	'zm00001d046134'	'(at1g30080 : 428.0) Glycosyl hydrolase superfamily protein; FUNCTIONS IN: cation binding, hydrolase activity, hydrolyzing O-glycosyl compounds, catalytic activity; INVOLVED IN: carbohydrate metabolic process; LOCATED IN: endomembrane system; EXPRESSED IN: 9 plant structures; EXPRESSED DURING: 4 anthesis, F mature embryo stage, petal differentiation and expansion stage, E expanded cotyledon stage…	T
'26.4'	'misc.beta 1,3 glucan hydrolases'	'zm00001d009686'	'(at1g29380 : 127.0) Carbohydrate-binding X8 domain superfamily protein; FUNCTIONS IN: molecular_function unknown; INVOLVED IN: biological_process unknown; LOCATED IN: endomembrane system; CONTAINS InterPro DOMAIN/s: X8 (InterPro:IPR012946); BEST Arabidopsis thaliana protein match is: Carbohydrate-binding X8 domain superfamily protein (TAIR:AT2G30933.1); Has 79591 Blast hits to 28935 proteins in …	T
'26.4.1'	'misc.beta 1,3 glucan hydrolases.glucan endo-1,3-beta-glucosidase'	'zm00001d046134'	'(at1g30080 : 428.0) Glycosyl hydrolase superfamily protein; FUNCTIONS IN: cation binding, hydrolase activity, hydrolyzing O-glycosyl compounds, catalytic activity; INVOLVED IN: carbohydrate metabolic process; LOCATED IN: endomembrane system; EXPRESSED IN: 9 plant structures; EXPRESSED DURING: 4 anthesis, F mature embryo stage, petal differentiation and expansion stage, E expanded cotyledon stage…	T
'26.4.1'	'misc.beta 1,3 glucan hydrolases.glucan endo-1,3-beta-glucosidase'	'zm00001d033423'	'(at4g34480 : 486.0) O-Glycosyl hydrolases family 17 protein; FUNCTIONS IN: cation binding, hydrolase activity, hydrolyzing O-glycosyl compounds, catalytic activity; INVOLVED IN: carbohydrate metabolic process; LOCATED IN: endomembrane system; EXPRESSED IN: 22 plant structures; EXPRESSED DURING: 13 growth stages; CONTAINS InterPro DOMAIN/s: X8 (InterPro:IPR012946), Glycoside hydrolase, catalytic …	T
'26.4.1'	'misc.beta 1,3 glucan hydrolases.glucan endo-1,3-beta-glucosidase'	'zm00001d015783'	'(at3g15800 : 413.0) Glycosyl hydrolase superfamily protein; FUNCTIONS IN: cation binding, hydrolase activity, hydrolyzing O-glycosyl compounds, catalytic activity; INVOLVED IN: carbohydrate metabolic process; LOCATED IN: anchored to membrane; EXPRESSED IN: root; CONTAINS InterPro DOMAIN/s: Glycoside hydrolase, family 17 (InterPro:IPR000490), Glycoside hydrolase, catalytic core (InterPro:IPR01785…	T
'26.4.1'	'misc.beta 1,3 glucan hydrolases.glucan endo-1,3-beta-glucosidase'	'zm00001d013573'	'(at4g34480 : 491.0) O-Glycosyl hydrolases family 17 protein; FUNCTIONS IN: cation binding, hydrolase activity, hydrolyzing O-glycosyl compounds, catalytic activity; INVOLVED IN: carbohydrate metabolic process; LOCATED IN: endomembrane system; EXPRESSED IN: 22 plant structures; EXPRESSED DURING: 13 growth stages; CONTAINS InterPro DOMAIN/s: X8 (InterPro:IPR012946), Glycoside hydrolase, catalytic …	T
'26.4.1'	'misc.beta 1,3 glucan hydrolases.glucan endo-1,3-beta-glucosidase'	'zm00001d011886'	'(q02438|e13e_horvu : 299.0) Glucan endo-1,3-beta-glucosidase GV (EC 3.2.1.39) ((1->3)-beta-glucan endohydrolase GV) ((1->3)-beta-glucanase isoenzyme GV) (Beta-1,3-endoglucanase GV) - Hordeum vulgare (Barley) & (at3g57260 : 219.0) beta 1,3-glucanase; "beta-1,3-glucanase 2" (BGL2); FUNCTIONS IN: glucan 1,3-beta-glucosidase activity, protein binding, cellulase activity, hydrolase activity, hydrolyz…	T
'26.4.1'	'misc.beta 1,3 glucan hydrolases.glucan endo-1,3-beta-glucosidase'	'zm00001d009876'	'(p12257|gub2_horvu : 456.0) Lichenase-2 precursor (EC 3.2.1.73) (Lichenase II) (Endo-beta-1,3-1,4 glucanase II) ((1->3,1->4)-beta-glucanase isoenzyme EII) (Fragment) - Hordeum vulgare (Barley) & (at4g16260 : 245.0) Glycosyl hydrolase superfamily protein; FUNCTIONS IN: cation binding, hydrolase activity, hydrolyzing O-glycosyl compounds, catalytic activity; INVOLVED IN: defense response to fungus…	T
'26.5'	'misc.acyl transferases'	'zm00001d021073'	'(at1g54570 : 589.0) Esterase/lipase/thioesterase family protein; FUNCTIONS IN: transferase activity, transferring acyl groups other than amino-acyl groups, catalytic activity; LOCATED IN: chloroplast, plastoglobule; EXPRESSED IN: 22 plant structures; EXPRESSED DURING: 13 growth stages; CONTAINS InterPro DOMAIN/s: Diacylglycerol acyltransferase (InterPro:IPR007130); BEST Arabidopsis thaliana prot…	T
'26.7'	'misc.oxidases - copper, flavone etc'	'zm00001d042260'	'(at4g13010 : 328.0) Oxidoreductase, zinc-binding dehydrogenase family protein; FUNCTIONS IN: oxidoreductase activity, zinc ion binding; INVOLVED IN: oxidation reduction; LOCATED IN: chloroplast thylakoid membrane, chloroplast, plasma membrane, vacuole; EXPRESSED IN: 25 plant structures; EXPRESSED DURING: 15 growth stages; CONTAINS InterPro DOMAIN/s: GroES-like (InterPro:IPR011032), Alcohol dehyd…	T
'26.7'	'misc.oxidases - copper, flavone etc'	'zm00001d031257'	'(q41001|bcp_pea : 97.8) Blue copper protein precursor - Pisum sativum (Garden pea) & (at2g32300 : 90.5) Encodes a uclacyanin, a protein precursor that is closely related to precursors of stellacyanins and a blue copper protein from pea pods.; uclacyanin 1 (UCC1); FUNCTIONS IN: electron carrier activity, copper ion binding; LOCATED IN: anchored to membrane; EXPRESSED IN: 7 plant structures; EXPRE…	T
'26.7'	'misc.oxidases - copper, flavone etc'	'zm00001d020794'	'(q41001|bcp_pea : 120.0) Blue copper protein precursor - Pisum sativum (Garden pea) & (at1g72230 : 103.0) Cupredoxin superfamily protein; FUNCTIONS IN: electron carrier activity, copper ion binding; LOCATED IN: anchored to membrane; EXPRESSED IN: 17 plant structures; EXPRESSED DURING: 9 growth stages; CONTAINS InterPro DOMAIN/s: Plastocyanin-like (InterPro:IPR003245), Cupredoxin (InterPro:IPR008…	T
'26.7'	'misc.oxidases - copper, flavone etc'	'zm00001d016841'	'(at4g15760 : 262.0) Encodes a protein with similarity to monooxygenases that are known to degrade salicylic acid (SA).; monooxygenase 1 (MO1); FUNCTIONS IN: monooxygenase activity; INVOLVED IN: response to bacterium; LOCATED IN: endoplasmic reticulum; CONTAINS InterPro DOMAIN/s: Monooxygenase, FAD-binding (InterPro:IPR002938); BEST Arabidopsis thaliana protein match is: FAD/NAD(P)-binding oxidor…	T
'26.7'	'misc.oxidases - copper, flavone etc'	'zm00001d006069'	'(at4g13010 : 329.0) Oxidoreductase, zinc-binding dehydrogenase family protein; FUNCTIONS IN: oxidoreductase activity, zinc ion binding; INVOLVED IN: oxidation reduction; LOCATED IN: chloroplast thylakoid membrane, chloroplast, plasma membrane, vacuole; EXPRESSED IN: 25 plant structures; EXPRESSED DURING: 15 growth stages; CONTAINS InterPro DOMAIN/s: GroES-like (InterPro:IPR011032), Alcohol dehyd…	T
'26.8'	'misc.nitrilases, *nitrile lyases, berberine bridge enzymes, reticuline oxidases, troponine reductases'	'zm00001d051214'	'(q42965|nrl4_tobac : 490.0) Nitrilase 4 (EC 3.5.5.1) - Nicotiana tabacum (Common tobacco) & (at5g22300 : 456.0) encodes a nitrilase isomer. The purified enzyme shows a strong substrate specificity for beta-cyano-L-alanine, a intermediate product of the cyanide detoxification pathway.; nitrilase 4 (NIT4); CONTAINS InterPro DOMAIN/s: Nitrilase/cyanide hydratase and apolipoprotein N-acyltransferase…	T
'26.8'	'misc.nitrilases, *nitrile lyases, berberine bridge enzymes, reticuline oxidases, troponine reductases'	'zm00001d037005'	'(at5g44400 : 409.0) FAD-binding Berberine family protein; FUNCTIONS IN: electron carrier activity, oxidoreductase activity, FAD binding, catalytic activity; LOCATED IN: cell wall; EXPRESSED IN: 18 plant structures; EXPRESSED DURING: 10 growth stages; CONTAINS InterPro DOMAIN/s: FAD-linked oxidase, FAD-binding, subdomain 2 (InterPro:IPR016168), FAD-binding, type 2 (InterPro:IPR016166), Berberine/…	T
'26.8'	'misc.nitrilases, *nitrile lyases, berberine bridge enzymes, reticuline oxidases, troponine reductases'	'zm00001d021981'	'(at1g44820 : 137.0) Peptidase M20/M25/M40 family protein; FUNCTIONS IN: hydrolase activity, aminoacylase activity; INVOLVED IN: metabolic process, cellular amino acid metabolic process; LOCATED IN: endomembrane system, cytoplasm; EXPRESSED IN: guard cell; CONTAINS InterPro DOMAIN/s: Peptidase M20 (InterPro:IPR002933), N-acyl-L-amino-acid amidohydrolase (InterPro:IPR010159); BEST Arabidopsis thal…	T
'26.8'	'misc.nitrilases, *nitrile lyases, berberine bridge enzymes, reticuline oxidases, troponine reductases'	'zm00001d017598'	'(at1g12570 : 642.0) Glucose-methanol-choline (GMC) oxidoreductase family protein; FUNCTIONS IN: aldehyde-lyase activity, oxidoreductase activity, acting on CH-OH group of donors, FAD binding; INVOLVED IN: alcohol metabolic process; LOCATED IN: endomembrane system; EXPRESSED IN: 17 plant structures; EXPRESSED DURING: 9 growth stages; CONTAINS InterPro DOMAIN/s: Glucose-methanol-choline oxidoreduc…	T
'26.8'	'misc.nitrilases, *nitrile lyases, berberine bridge enzymes, reticuline oxidases, troponine reductases'	'zm00001d007687'	'(at5g06060 : 226.0) NAD(P)-binding Rossmann-fold superfamily protein; FUNCTIONS IN: oxidoreductase activity, binding, catalytic activity; INVOLVED IN: oxidation reduction, metabolic process; EXPRESSED IN: 23 plant structures; EXPRESSED DURING: 14 growth stages; CONTAINS InterPro DOMAIN/s: Short-chain dehydrogenase/reductase, conserved site (InterPro:IPR020904), NAD(P)-binding domain (InterPro:IP…	T
'26.9'	'misc.glutathione S transferases'	'zm00001d051928'	'(at5g44000 : 382.0) Glutathione S-transferase family protein; FUNCTIONS IN: glutathione transferase activity; LOCATED IN: chloroplast; EXPRESSED IN: 22 plant structures; EXPRESSED DURING: 13 growth stages; CONTAINS InterPro DOMAIN/s: Glutathione S-transferase, C-terminal (InterPro:IPR004046), Glutathione S-transferase, C-terminal-like (InterPro:IPR010987), Glutathione S-transferase/chloride chan…	T
'26.9'	'misc.glutathione S transferases'	'zm00001d043344'	'(p46420|gstf4_maize : 274.0) Glutathione S-transferase IV (EC 2.5.1.18) (GST-IV) (GST-27) (GST class-phi) - Zea mays (Maize) & (at3g62760 : 178.0) Encodes glutathione transferase belonging to the phi class of GSTs. Naming convention according to Wagner et al. (2002).; ATGSTF13; CONTAINS InterPro DOMAIN/s: Thioredoxin fold (InterPro:IPR012335), Glutathione S-transferase, C-terminal (InterPro:IPR0…	T
'26.9'	'misc.glutathione S transferases'	'zm00001d042098'	'(q03664|gstx3_tobac : 207.0) Probable glutathione S-transferase (EC 2.5.1.18) (Auxin-induced protein PCNT103) - Nicotiana tabacum (Common tobacco) & (at3g09270 : 191.0) Encodes glutathione transferase belonging to the tau class of GSTs. Naming convention according to Wagner et al. (2002).; glutathione S-transferase TAU 8 (GSTU8); FUNCTIONS IN: glutathione transferase activity; INVOLVED IN: respo…	T
'26.9'	'misc.glutathione S transferases'	'zm00001d024839'	'(p46420|gstf4_maize : 447.0) Glutathione S-transferase IV (EC 2.5.1.18) (GST-IV) (GST-27) (GST class-phi) - Zea mays (Maize) & (at3g62760 : 173.0) Encodes glutathione transferase belonging to the phi class of GSTs. Naming convention according to Wagner et al. (2002).; ATGSTF13; CONTAINS InterPro DOMAIN/s: Thioredoxin fold (InterPro:IPR012335), Glutathione S-transferase, C-terminal (InterPro:IPR0…	T
'26.9'	'misc.glutathione S transferases'	'zm00001d018220'	'(q03664|gstx3_tobac : 200.0) Probable glutathione S-transferase (EC 2.5.1.18) (Auxin-induced protein PCNT103) - Nicotiana tabacum (Common tobacco) & (at3g09270 : 192.0) Encodes glutathione transferase belonging to the tau class of GSTs. Naming convention according to Wagner et al. (2002).; glutathione S-transferase TAU 8 (GSTU8); FUNCTIONS IN: glutathione transferase activity; INVOLVED IN: respo…	T
'26.9'	'misc.glutathione S transferases'	'novel01679'	'(p49248|in21_maize : 180.0) IN2-1 protein - Zea mays (Maize) & (at3g55040 : 95.5) Encodes a member of the lambda family of glutathione transferases. It has thiol transferase activity and self S-glutathionylation activity in vitro.; glutathione transferase lambda 2 (GSTL2); INVOLVED IN: protein amino acid glutathionylation; LOCATED IN: chloroplast, chloroplast stroma; EXPRESSED IN: 23 plant struc…	T
'27.1'	'RNA.processing'	'zm00001d018882'	'(at4g20440 : 148.0) small nuclear ribonucleoprotein associated protein B; INVOLVED IN: nuclear mRNA splicing, via spliceosome; LOCATED IN: nucleoplasm, Cajal body, nucleus, small nucleolar ribonucleoprotein complex; EXPRESSED IN: 21 plant structures; EXPRESSED DURING: 13 growth stages; CONTAINS InterPro DOMAIN/s: Like-Sm ribonucleoprotein (LSM) domain (InterPro:IPR001163), Small ribonucleoprotei…	T
'27.1.1'	'RNA.processing.splicing'	'zm00001d026528'	'(at1g17370 : 286.0) oligouridylate binding protein 1B (UBP1B); FUNCTIONS IN: mRNA 3'-UTR binding; EXPRESSED IN: 23 plant structures; EXPRESSED DURING: 13 growth stages; CONTAINS InterPro DOMAIN/s: RNA recognition motif, RNP-1 (InterPro:IPR000504), Nucleotide-binding, alpha-beta plait (InterPro:IPR012677); BEST Arabidopsis thaliana protein match is: RNA-binding (RRM/RBD/RNP motifs) family protein…	T
'27.1.1'	'RNA.processing.splicing'	'zm00001d026522'	'(at1g17370 : 168.0) oligouridylate binding protein 1B (UBP1B); FUNCTIONS IN: mRNA 3'-UTR binding; EXPRESSED IN: 23 plant structures; EXPRESSED DURING: 13 growth stages; CONTAINS InterPro DOMAIN/s: RNA recognition motif, RNP-1 (InterPro:IPR000504), Nucleotide-binding, alpha-beta plait (InterPro:IPR012677); BEST Arabidopsis thaliana protein match is: RNA-binding (RRM/RBD/RNP motifs) family protein…	T
'27.1.1'	'RNA.processing.splicing'	'zm00001d013489'	'(at1g03140 : 312.0) splicing factor Prp18 family protein; INVOLVED IN: RNA splicing; LOCATED IN: spliceosomal complex; EXPRESSED IN: male gametophyte, cultured cell, pollen tube; EXPRESSED DURING: L mature pollen stage, M germinated pollen stage; CONTAINS InterPro DOMAIN/s: Pre-mRNA processing factor 4 (PRP4) like (InterPro:IPR014906), Splicing factor motif (InterPro:IPR003648), Prp18 (InterPro:…	T
'27.1.1'	'RNA.processing.splicing'	'novel00375'	'(at3g14100 : 187.0) RNA-binding (RRM/RBD/RNP motifs) family protein; FUNCTIONS IN: mRNA 3'-UTR binding; EXPRESSED IN: 25 plant structures; EXPRESSED DURING: 14 growth stages; CONTAINS InterPro DOMAIN/s: RNA recognition motif, RNP-1 (InterPro:IPR000504), Nucleotide-binding, alpha-beta plait (InterPro:IPR012677); BEST Arabidopsis thaliana protein match is: oligouridylate-binding protein 1A (TAIR:A…	T
'27.1.19'	'RNA.processing.ribonucleases'	'zm00001d042888'	'(at1g03360 : 147.0) ribosomal RNA processing 4 (RRP4); FUNCTIONS IN: exonuclease activity; LOCATED IN: mitochondrion; EXPRESSED IN: 20 plant structures; EXPRESSED DURING: 13 growth stages; CONTAINS InterPro DOMAIN/s: Nucleic acid-binding, OB-fold-like (InterPro:IPR016027); Has 615 Blast hits to 615 proteins in 291 species: Archae - 147; Bacteria - 0; Metazoa - 136; Fungi - 134; Plants - 55; Viru…	T
'27.1.19'	'RNA.processing.ribonucleases'	'zm00001d039451'	'(at1g55140 : 97.4) Ribonuclease III family protein; FUNCTIONS IN: RNA binding, ribonuclease III activity; INVOLVED IN: RNA processing; LOCATED IN: chloroplast; CONTAINS InterPro DOMAIN/s: Ribonuclease III (InterPro:IPR000999); BEST Arabidopsis thaliana protein match is: Ribonuclease III family protein (TAIR:AT3G13740.1); Has 289 Blast hits to 288 proteins in 138 species: Archae - 0; Bacteria - 2…	T
'27.1.19'	'RNA.processing.ribonucleases'	'zm00001d022630'	'(at1g14220 : 141.0) Ribonuclease T2 family protein; FUNCTIONS IN: ribonuclease T2 activity, endoribonuclease activity, RNA binding; INVOLVED IN: N-terminal protein myristoylation; LOCATED IN: endomembrane system; EXPRESSED IN: sperm cell, root, egg cell; CONTAINS InterPro DOMAIN/s: Ribonuclease T2 (InterPro:IPR001568), Ribonuclease T2, active site (InterPro:IPR018188); BEST Arabidopsis thaliana …	T
'27.2'	'RNA.transcription'	'zm00001d026421'	'(at3g18090 : 1214.0) Encodes a subunit of RNA polymerase IV (aka RNA polymerase D). NRPD2b is closely related to NRPD2a, but has lower levels of transcription and does not affect endogenous siRNA when mutated.; nuclear RNA polymerase D2B (NRPD2B); FUNCTIONS IN: DNA-directed RNA polymerase activity, ribonucleoside binding, DNA binding; INVOLVED IN: transcription; LOCATED IN: membrane; EXPRESSED I…	T
'27.3'	'RNA.regulation of transcription'	'zm00001d043325'	'(at2g34640 : 459.0) Present in transcriptionally active plastid chromosomes. Involved in plastid gene expression.; plastid transcriptionally active 12 (PTAC12); FUNCTIONS IN: molecular_function unknown; INVOLVED IN: positive regulation of transcription, DNA-dependent, transcription from plastid promoter; LOCATED IN: plastid chromosome, chloroplast, nucleoid; EXPRESSED IN: 21 plant structures; EX…	T
'27.3.11'	'RNA.regulation of transcription.C2H2 zinc finger family'	'zm00001d047334'	'(at5g04340 : 114.0) putative c2h2 zinc finger transcription factor mRNA,; zinc finger of Arabidopsis thaliana 6 (ZAT6); FUNCTIONS IN: sequence-specific DNA binding transcription factor activity, zinc ion binding, nucleic acid binding; LOCATED IN: intracellular; EXPRESSED IN: 15 plant structures; EXPRESSED DURING: 8 growth stages; CONTAINS InterPro DOMAIN/s: Zinc finger, C2H2-like (InterPro:IPR01…	T
'27.3.11'	'RNA.regulation of transcription.C2H2 zinc finger family'	'zm00001d038297'	'(at3g20880 : 286.0) WIP domain protein 4 (WIP4); FUNCTIONS IN: sequence-specific DNA binding transcription factor activity, zinc ion binding, nucleic acid binding; INVOLVED IN: regulation of transcription; LOCATED IN: nucleus; EXPRESSED IN: central root cap of the primary root, quiescent center; EXPRESSED DURING: seedling growth; CONTAINS InterPro DOMAIN/s: Zinc finger, C2H2-like (InterPro:IPR01…	T
'27.3.11'	'RNA.regulation of transcription.C2H2 zinc finger family'	'zm00001d021403'	'(at2g02070 : 325.0) indeterminate(ID)-domain 5 (IDD5); FUNCTIONS IN: sequence-specific DNA binding transcription factor activity, zinc ion binding, nucleic acid binding; INVOLVED IN: regulation of transcription; LOCATED IN: intracellular, chloroplast; EXPRESSED IN: 22 plant structures; EXPRESSED DURING: 13 growth stages; CONTAINS InterPro DOMAIN/s: Zinc finger, C2H2-like (InterPro:IPR015880), Zi…	T
'27.3.11'	'RNA.regulation of transcription.C2H2 zinc finger family'	'zm00001d013208'	'(q42430|zfp1_wheat : 145.0) Zinc-finger protein 1 (WZF1) - Triticum aestivum (Wheat) & (at1g27730 : 83.6) Related to Cys2/His2-type zinc-finger proteins found in higher plants. Compensated for a subset of calcineurin deficiency in yeast. Salt tolerance produced by ZAT10 appeared to be partially dependent on ENA1/PMR2, a P-type ATPase required for Li+ and Na+ efflux in yeast. The protein is local…	T
'27.3.11'	'RNA.regulation of transcription.C2H2 zinc finger family'	'zm00001d007340'	'(at4g21160 : 217.0) ADP-ribosylation factor GTPase-activating protein containing zinc finger and C2 domains and a novel PI-3-P-binding protein region. Binds PI-3-P. Highest expression levels in flowering tissue, rosettes and roots. A member of ARF GAP domain (AGD), A thaliana has 15 members, grouped into four classes.; ZAC; FUNCTIONS IN: phospholipid binding, ARF GTPase activator activity; INVOL…	T
'27.3.14'	'RNA.regulation of transcription.CCAAT box binding factor family, HAP2'	'zm00001d006835'	'(at1g72830 : 130.0) Encodes a subunit of CCAAT-binding complex, binds to CCAAT box motif present in some plant promoter sequences. One of three members of this class (HAP2A, HAP2B, HAP2C), it is expressed in vegetative and reproductive tissues.; "nuclear factor Y, subunit A3" (NF-YA3); FUNCTIONS IN: sequence-specific DNA binding transcription factor activity; INVOLVED IN: regulation of transcrip…	T
'27.3.20'	'RNA.regulation of transcription.G2-like transcription factor family, GARP'	'zm00001d046947'	'(at1g79430 : 233.0) Encodes gene product that is required for several aspects of phloem development in the root: (1) the specific divisions organizing the phloem pole, (2) sieve element differentiation and (3) the expression of a companion-specific gene. Mutant has a defect in the organization of phloem poles in the root. apl seedlings have a short, determinate root with only occasional lateral …	T
'27.3.20'	'RNA.regulation of transcription.G2-like transcription factor family, GARP'	'zm00001d034160'	'(at2g03500 : 106.0) Homeodomain-like superfamily protein; CONTAINS InterPro DOMAIN/s: Homeodomain-like (InterPro:IPR009057), Myb, DNA-binding (InterPro:IPR014778), HTH transcriptional regulator, Myb-type, DNA-binding (InterPro:IPR017930), Myb-like DNA-binding domain, SHAQKYF class (InterPro:IPR006447), Homeodomain-related (InterPro:IPR012287); BEST Arabidopsis thaliana protein match is: myb-like…	T
'27.3.20'	'RNA.regulation of transcription.G2-like transcription factor family, GARP'	'zm00001d028984'	'(at3g04030 : 299.0) Homeodomain-like superfamily protein; FUNCTIONS IN: sequence-specific DNA binding transcription factor activity; INVOLVED IN: regulation of transcription; EXPRESSED IN: 9 plant structures; EXPRESSED DURING: 4 anthesis, 4 leaf senescence stage, petal differentiation and expansion stage; CONTAINS InterPro DOMAIN/s: Homeodomain-like (InterPro:IPR009057), Myb, DNA-binding (InterP…	T
'27.3.20'	'RNA.regulation of transcription.G2-like transcription factor family, GARP'	'zm00001d022526'	'(at3g04030 : 214.0) Homeodomain-like superfamily protein; FUNCTIONS IN: sequence-specific DNA binding transcription factor activity; INVOLVED IN: regulation of transcription; EXPRESSED IN: 9 plant structures; EXPRESSED DURING: 4 anthesis, 4 leaf senescence stage, petal differentiation and expansion stage; CONTAINS InterPro DOMAIN/s: Homeodomain-like (InterPro:IPR009057), Myb, DNA-binding (InterP…	T
'27.3.20'	'RNA.regulation of transcription.G2-like transcription factor family, GARP'	'zm00001d015226'	'(at3g13040 : 236.0) myb-like HTH transcriptional regulator family protein; CONTAINS InterPro DOMAIN/s: Homeodomain-like (InterPro:IPR009057), Myb, DNA-binding (InterPro:IPR014778), HTH transcriptional regulator, Myb-type, DNA-binding (InterPro:IPR017930), Myb-like DNA-binding domain, SHAQKYF class (InterPro:IPR006447), Homeodomain-related (InterPro:IPR012287); BEST Arabidopsis thaliana protein m…	T
'27.3.20'	'RNA.regulation of transcription.G2-like transcription factor family, GARP'	'zm00001d010634'	'(at5g18240 : 302.0) Encodes MYR1 (MYR1).; myb-related protein 1 (MYR1); FUNCTIONS IN: sequence-specific DNA binding transcription factor activity; INVOLVED IN: regulation of transcription; EXPRESSED IN: 21 plant structures; EXPRESSED DURING: 10 growth stages; CONTAINS InterPro DOMAIN/s: Homeodomain-like (InterPro:IPR009057), Myb, DNA-binding (InterPro:IPR014778), Myb-like DNA-binding domain, SHA…	T
'27.3.21'	'RNA.regulation of transcription.GRAS transcription factor family'	'zm00001d028603'	'(at2g37650 : 521.0) GRAS family transcription factor; CONTAINS InterPro DOMAIN/s: Transcription factor GRAS (InterPro:IPR005202); BEST Arabidopsis thaliana protein match is: SCARECROW-like 14 (TAIR:AT1G07530.1); Has 2417 Blast hits to 2350 proteins in 288 species: Archae - 0; Bacteria - 4; Metazoa - 2; Fungi - 0; Plants - 2410; Viruses - 0; Other Eukaryotes - 1 (source: NCBI BLink). & (q8gve1|ci…	T
'27.3.21'	'RNA.regulation of transcription.GRAS transcription factor family'	'zm00001d011069'	'(at2g37650 : 455.0) GRAS family transcription factor; CONTAINS InterPro DOMAIN/s: Transcription factor GRAS (InterPro:IPR005202); BEST Arabidopsis thaliana protein match is: SCARECROW-like 14 (TAIR:AT1G07530.1); Has 2417 Blast hits to 2350 proteins in 288 species: Archae - 0; Bacteria - 4; Metazoa - 2; Fungi - 0; Plants - 2410; Viruses - 0; Other Eukaryotes - 1 (source: NCBI BLink). & (q8gve1|ci…	T
'27.3.22'	'RNA.regulation of transcription.HB,Homeobox transcription factor family'	'zm00001d048527'	'(at5g60690 : 1130.0) REVOLUTA regulates meristem initiation at lateral positions. a member of a small homeodomain-leucine zipper family. Has overlapping functions with PHAVOLUTA and PHABULOSA.; REVOLUTA (REV); CONTAINS InterPro DOMAIN/s: Homeobox (InterPro:IPR001356), Homeodomain-like (InterPro:IPR009057), Lipid-binding START (InterPro:IPR002913), MEKHLA (InterPro:IPR013978), Homeodomain-related…	T
'27.3.22'	'RNA.regulation of transcription.HB,Homeobox transcription factor family'	'zm00001d027431'	'(at1g62990 : 375.0) Encodes a homeodomain transcription factor of the Knotted family. May be involved in secondary cell wall biosynthesis. Mutants have moderately irregular xylem development. Expression of this gene is upregulated by SND1 and MYB46.; KNOTTED-like homeobox of Arabidopsis thaliana 7 (KNAT7); CONTAINS InterPro DOMAIN/s: ELK (InterPro:IPR005539), KNOX1 (InterPro:IPR005540), Homeobox…	T
'27.3.22'	'RNA.regulation of transcription.HB,Homeobox transcription factor family'	'zm00001d021268'	'(at2g46680 : 140.0) encodes a putative transcription factor that contains a homeodomain closely linked to a leucine zipper motif. Transcript is detected in all tissues examined. Is transcriptionally regulated in an ABA-dependent manner and may act in a signal transduction pathway which mediates a drought response.; homeobox 7 (HB-7); FUNCTIONS IN: transcription activator activity, sequence-speci…	T
'27.3.22'	'RNA.regulation of transcription.HB,Homeobox transcription factor family'	'zm00001d016298'	'(at4g32980 : 112.0) Encodes transcription factor involved in photomorphogenesis. Regulates gibberellin biosynthesis. Activated by AGAMOUS in a cal-1, ap1-1 background. Expressed at low levels in developing stamens. Increased levels of ATH1 severely delay flowering in the C24 accession. Most remarkably, ectopically expressed ATH1 hardly had an effect on flowering time in the Col-0 and Ler accessi…	T
'27.3.22'	'RNA.regulation of transcription.HB,Homeobox transcription factor family'	'zm00001d014628'	'(at4g37790 : 144.0) Encodes homeobox protein HAT22, member of the HD-Zip II family.; HAT22; FUNCTIONS IN: sequence-specific DNA binding transcription factor activity; INVOLVED IN: regulation of transcription, DNA-dependent, response to cytokinin stimulus; LOCATED IN: nucleus; EXPRESSED IN: 22 plant structures; EXPRESSED DURING: 13 growth stages; CONTAINS InterPro DOMAIN/s: Homeobox, conserved si…	T
'27.3.23'	'RNA.regulation of transcription.HSF,Heat-shock transcription factor family'	'zm00001d015095'	'(at4g17600 : 243.0) Encodes Lil3:1 (light-harvesting-like) protein. Belongs to the Lhc super-gene family encodes the light-harvesting chlorophyll a/b-binding (LHC) proteins that constitute the antenna system of the photosynthetic apparatus. A generic LHC motif is present in Lil3:1.; LIL3:1; FUNCTIONS IN: sequence-specific DNA binding transcription factor activity; INVOLVED IN: regulation of tran…	T
'27.3.25'	'RNA.regulation of transcription.MYB domain transcription factor family'	'zm00001d051788'	'(q50ex6|odo1_pethy : 245.0) ODORANT1 protein (MYB-like protein ODO1) - Petunia hybrida (Petunia) & (at1g66230 : 243.0) Encodes a putative transcription factor (MYB20).; myb domain protein 20 (MYB20); CONTAINS InterPro DOMAIN/s: SANT, DNA-binding (InterPro:IPR001005), Homeodomain-like (InterPro:IPR009057), Myb, DNA-binding (InterPro:IPR014778), HTH transcriptional regulator, Myb-type, DNA-binding…	T
'27.3.25'	'RNA.regulation of transcription.MYB domain transcription factor family'	'zm00001d051480'	'(at1g01060 : 114.0) LHY encodes a myb-related putative transcription factor involved in circadian rhythm along with another myb transcription factor CCA1; LATE ELONGATED HYPOCOTYL (LHY); FUNCTIONS IN: DNA binding, sequence-specific DNA binding transcription factor activity; INVOLVED IN: in 11 processes; EXPRESSED IN: 22 plant structures; EXPRESSED DURING: 13 growth stages; BEST Arabidopsis thali…	T
'27.3.25'	'RNA.regulation of transcription.MYB domain transcription factor family'	'zm00001d044975'	'(p10290|mybc_maize : 426.0) Anthocyanin regulatory C1 protein - Zea mays (Maize) & (at4g34990 : 176.0) Member of the R2R3 factor gene family.; myb domain protein 32 (MYB32); CONTAINS InterPro DOMAIN/s: SANT, DNA-binding (InterPro:IPR001005), Homeodomain-like (InterPro:IPR009057), Myb, DNA-binding (InterPro:IPR014778), HTH transcriptional regulator, Myb-type, DNA-binding (InterPro:IPR017930), Hom…	T
'27.3.25'	'RNA.regulation of transcription.MYB domain transcription factor family'	'zm00001d028984'	'(at3g04030 : 299.0) Homeodomain-like superfamily protein; FUNCTIONS IN: sequence-specific DNA binding transcription factor activity; INVOLVED IN: regulation of transcription; EXPRESSED IN: 9 plant structures; EXPRESSED DURING: 4 anthesis, 4 leaf senescence stage, petal differentiation and expansion stage; CONTAINS InterPro DOMAIN/s: Homeodomain-like (InterPro:IPR009057), Myb, DNA-binding (InterP…	T
'27.3.25'	'RNA.regulation of transcription.MYB domain transcription factor family'	'zm00001d022526'	'(at3g04030 : 214.0) Homeodomain-like superfamily protein; FUNCTIONS IN: sequence-specific DNA binding transcription factor activity; INVOLVED IN: regulation of transcription; EXPRESSED IN: 9 plant structures; EXPRESSED DURING: 4 anthesis, 4 leaf senescence stage, petal differentiation and expansion stage; CONTAINS InterPro DOMAIN/s: Homeodomain-like (InterPro:IPR009057), Myb, DNA-binding (InterP…	T
'27.3.25'	'RNA.regulation of transcription.MYB domain transcription factor family'	'zm00001d011515'	'(at4g39250 : 90.1) RAD-like 1 (RL1); CONTAINS InterPro DOMAIN/s: Molecular chaperone, heat shock protein, Hsp40, DnaJ (InterPro:IPR015609), SANT, DNA-binding (InterPro:IPR001005), Myb, DNA-binding (InterPro:IPR014778), Homeodomain-like (InterPro:IPR009057), SANT, eukarya (InterPro:IPR017884); BEST Arabidopsis thaliana protein match is: Homeodomain-like superfamily protein (TAIR:AT2G21650.1); Has…	T
'27.3.25'	'RNA.regulation of transcription.MYB domain transcription factor family'	'zm00001d010634'	'(at5g18240 : 302.0) Encodes MYR1 (MYR1).; myb-related protein 1 (MYR1); FUNCTIONS IN: sequence-specific DNA binding transcription factor activity; INVOLVED IN: regulation of transcription; EXPRESSED IN: 21 plant structures; EXPRESSED DURING: 10 growth stages; CONTAINS InterPro DOMAIN/s: Homeodomain-like (InterPro:IPR009057), Myb, DNA-binding (InterPro:IPR014778), Myb-like DNA-binding domain, SHA…	T
'27.3.26'	'RNA.regulation of transcription.MYB-related transcription factor family'	'zm00001d051480'	'(at1g01060 : 114.0) LHY encodes a myb-related putative transcription factor involved in circadian rhythm along with another myb transcription factor CCA1; LATE ELONGATED HYPOCOTYL (LHY); FUNCTIONS IN: DNA binding, sequence-specific DNA binding transcription factor activity; INVOLVED IN: in 11 processes; EXPRESSED IN: 22 plant structures; EXPRESSED DURING: 13 growth stages; BEST Arabidopsis thali…	T
'27.3.26'	'RNA.regulation of transcription.MYB-related transcription factor family'	'zm00001d043968'	'(at4g39250 : 85.5) RAD-like 1 (RL1); CONTAINS InterPro DOMAIN/s: Molecular chaperone, heat shock protein, Hsp40, DnaJ (InterPro:IPR015609), SANT, DNA-binding (InterPro:IPR001005), Myb, DNA-binding (InterPro:IPR014778), Homeodomain-like (InterPro:IPR009057), SANT, eukarya (InterPro:IPR017884); BEST Arabidopsis thaliana protein match is: Homeodomain-like superfamily protein (TAIR:AT2G21650.1); Has…	T
'27.3.26'	'RNA.regulation of transcription.MYB-related transcription factor family'	'zm00001d011515'	'(at4g39250 : 90.1) RAD-like 1 (RL1); CONTAINS InterPro DOMAIN/s: Molecular chaperone, heat shock protein, Hsp40, DnaJ (InterPro:IPR015609), SANT, DNA-binding (InterPro:IPR001005), Myb, DNA-binding (InterPro:IPR014778), Homeodomain-like (InterPro:IPR009057), SANT, eukarya (InterPro:IPR017884); BEST Arabidopsis thaliana protein match is: Homeodomain-like superfamily protein (TAIR:AT2G21650.1); Has…	T
'27.3.27'	'RNA.regulation of transcription.NAC domain transcription factor family'	'zm00001d052564'	'(at3g44350 : 152.0) NAC domain containing protein 61 (NAC061); CONTAINS InterPro DOMAIN/s: No apical meristem (NAM) protein (InterPro:IPR003441); BEST Arabidopsis thaliana protein match is: NAC domain containing protein 90 (TAIR:AT5G22380.1); Has 30201 Blast hits to 17322 proteins in 780 species: Archae - 12; Bacteria - 1396; Metazoa - 17338; Fungi - 3422; Plants - 5037; Viruses - 0; Other Eukar…	T
'27.3.27'	'RNA.regulation of transcription.NAC domain transcription factor family'	'zm00001d041886'	'(at4g28530 : 162.0) NAC domain containing protein 74 (NAC074); FUNCTIONS IN: sequence-specific DNA binding transcription factor activity; INVOLVED IN: multicellular organismal development, regulation of transcription; LOCATED IN: cellular_component unknown; EXPRESSED IN: 18 plant structures; EXPRESSED DURING: 13 growth stages; CONTAINS InterPro DOMAIN/s: No apical meristem (NAM) protein (InterPr…	T
'27.3.27'	'RNA.regulation of transcription.NAC domain transcription factor family'	'zm00001d013151'	'(at2g43000 : 248.0) NAC domain containing protein 42 (NAC042); FUNCTIONS IN: sequence-specific DNA binding transcription factor activity; INVOLVED IN: multicellular organismal development, regulation of transcription; LOCATED IN: cellular_component unknown; EXPRESSED IN: 9 plant structures; EXPRESSED DURING: 6 growth stages; CONTAINS InterPro DOMAIN/s: No apical meristem (NAM) protein (InterPro:…	T
'27.3.3'	'RNA.regulation of transcription.AP2/EREBP, APETALA2/Ethylene-responsive element binding protein family'	'zm00001d048991'	'(at1g71450 : 98.6) encodes a member of the DREB subfamily A-4 of ERF/AP2 transcription factor family. The protein contains one AP2 domain. There are 17 members in this subfamily including TINY.; Integrase-type DNA-binding superfamily protein; FUNCTIONS IN: DNA binding, sequence-specific DNA binding transcription factor activity; INVOLVED IN: regulation of transcription, DNA-dependent; LOCATED IN…	T
'27.3.3'	'RNA.regulation of transcription.AP2/EREBP, APETALA2/Ethylene-responsive element binding protein family'	'zm00001d044857'	'(at1g22190 : 135.0) Integrase-type DNA-binding superfamily protein; FUNCTIONS IN: DNA binding, sequence-specific DNA binding transcription factor activity; INVOLVED IN: regulation of transcription, DNA-dependent; LOCATED IN: nucleus; EXPRESSED IN: 22 plant structures; EXPRESSED DURING: 13 growth stages; CONTAINS InterPro DOMAIN/s: DNA-binding, integrase-type (InterPro:IPR016177), Pathogenesis-re…	T
'27.3.3'	'RNA.regulation of transcription.AP2/EREBP, APETALA2/Ethylene-responsive element binding protein family'	'zm00001d039077'	'(at1g64380 : 124.0) encodes a member of the DREB subfamily A-6 of ERF/AP2 transcription factor family. The protein contains one AP2 domain. There are 8 members in this subfamily including RAP2.4.; Integrase-type DNA-binding superfamily protein; CONTAINS InterPro DOMAIN/s: DNA-binding, integrase-type (InterPro:IPR016177), Pathogenesis-related transcriptional factor/ERF, DNA-binding (InterPro:IPR0…	T
'27.3.3'	'RNA.regulation of transcription.AP2/EREBP, APETALA2/Ethylene-responsive element binding protein family'	'zm00001d032144'	'(at1g79700 : 239.0) Integrase-type DNA-binding superfamily protein; CONTAINS InterPro DOMAIN/s: DNA-binding, integrase-type (InterPro:IPR016177), Pathogenesis-related transcriptional factor/ERF, DNA-binding (InterPro:IPR001471); BEST Arabidopsis thaliana protein match is: ARIA-interacting double AP2 domain protein (TAIR:AT1G16060.1); Has 7501 Blast hits to 5104 proteins in 263 species: Archae - …	T
'27.3.3'	'RNA.regulation of transcription.AP2/EREBP, APETALA2/Ethylene-responsive element binding protein family'	'zm00001d027925'	'(at1g53910 : 103.0) encodes a member of the ERF (ethylene response factor) subfamily B-2 of ERF/AP2 transcription factor family (RAP2.12). The protein contains one AP2 domain. There are 5 members in this subfamily including RAP2.2 AND RAP2.12.; related to AP2 12 (RAP2.12); FUNCTIONS IN: DNA binding, sequence-specific DNA binding transcription factor activity; INVOLVED IN: regulation of transcrip…	T
'27.3.3'	'RNA.regulation of transcription.AP2/EREBP, APETALA2/Ethylene-responsive element binding protein family'	'zm00001d026447'	'(at2g23340 : 107.0) encodes a member of the DREB subfamily A-5 of ERF/AP2 transcription factor family. The protein contains one AP2 domain. There are 16 members in this subfamily including RAP2.1, RAP2.9 and RAP2.10.; DREB and EAR motif protein 3 (DEAR3); FUNCTIONS IN: DNA binding, sequence-specific DNA binding transcription factor activity; INVOLVED IN: regulation of transcription, DNA-dependen…	T
'27.3.3'	'RNA.regulation of transcription.AP2/EREBP, APETALA2/Ethylene-responsive element binding protein family'	'zm00001d026182'	'(at2g44940 : 120.0) encodes a member of the DREB subfamily A-4 of ERF/AP2 transcription factor family. The protein contains one AP2 domain. There are 17 members in this subfamily including TINY.; Integrase-type DNA-binding superfamily protein; FUNCTIONS IN: DNA binding, sequence-specific DNA binding transcription factor activity; INVOLVED IN: regulation of transcription, DNA-dependent; LOCATED I…	T
'27.3.3'	'RNA.regulation of transcription.AP2/EREBP, APETALA2/Ethylene-responsive element binding protein family'	'zm00001d017477'	'(at2g44940 : 136.0) encodes a member of the DREB subfamily A-4 of ERF/AP2 transcription factor family. The protein contains one AP2 domain. There are 17 members in this subfamily including TINY.; Integrase-type DNA-binding superfamily protein; FUNCTIONS IN: DNA binding, sequence-specific DNA binding transcription factor activity; INVOLVED IN: regulation of transcription, DNA-dependent; LOCATED I…	T
'27.3.32'	'RNA.regulation of transcription.WRKY domain transcription factor family'	'zm00001d050247'	'(at4g23810 : 122.0) member of WRKY Transcription Factor; Group III; WRKY53; FUNCTIONS IN: protein binding, DNA binding, transcription activator activity, sequence-specific DNA binding transcription factor activity; INVOLVED IN: in 6 processes; LOCATED IN: nucleus, chloroplast; EXPRESSED IN: 20 plant structures; EXPRESSED DURING: 12 growth stages; CONTAINS InterPro DOMAIN/s: DNA-binding WRKY (Int…	T
'27.3.32'	'RNA.regulation of transcription.WRKY domain transcription factor family'	'zm00001d047523'	'(at2g46400 : 88.2) member of WRKY Transcription Factor; Group III; WRKY DNA-binding protein 46 (WRKY46); CONTAINS InterPro DOMAIN/s: DNA-binding WRKY (InterPro:IPR003657); BEST Arabidopsis thaliana protein match is: WRKY family transcription factor (TAIR:AT4G23810.1); Has 3385 Blast hits to 2951 proteins in 185 species: Archae - 0; Bacteria - 0; Metazoa - 0; Fungi - 0; Plants - 3370; Viruses - 0…	T
'27.3.32'	'RNA.regulation of transcription.WRKY domain transcription factor family'	'zm00001d043663'	'(at5g64810 : 128.0) member of WRKY Transcription Factor; Group II-c; WRKY DNA-binding protein 51 (WRKY51); CONTAINS InterPro DOMAIN/s: DNA-binding WRKY (InterPro:IPR003657); BEST Arabidopsis thaliana protein match is: WRKY DNA-binding protein 50 (TAIR:AT5G26170.1); Has 30201 Blast hits to 17322 proteins in 780 species: Archae - 12; Bacteria - 1396; Metazoa - 17338; Fungi - 3422; Plants - 5037; V…	T
'27.3.32'	'RNA.regulation of transcription.WRKY domain transcription factor family'	'zm00001d043025'	'(at2g38470 : 318.0) Member of the plant WRKY transcription factor family. Regulates the antagonistic relationship between defense pathways mediating responses to P. syringae and necrotrophic fungal pathogens. Located in nucleus. Involved in response to various abiotic stresses - especially salt stress.; WRKY DNA-binding protein 33 (WRKY33); CONTAINS InterPro DOMAIN/s: DNA-binding WRKY (InterPro:…	T
'27.3.32'	'RNA.regulation of transcription.WRKY domain transcription factor family'	'zm00001d039531'	'(at5g26170 : 124.0) member of WRKY Transcription Factor; Group II-c; WRKY DNA-binding protein 50 (WRKY50); CONTAINS InterPro DOMAIN/s: DNA-binding WRKY (InterPro:IPR003657); BEST Arabidopsis thaliana protein match is: WRKY DNA-binding protein 51 (TAIR:AT5G64810.1); Has 30201 Blast hits to 17322 proteins in 780 species: Archae - 12; Bacteria - 1396; Metazoa - 17338; Fungi - 3422; Plants - 5037; V…	T
'27.3.32'	'RNA.regulation of transcription.WRKY domain transcription factor family'	'zm00001d039032'	'(at1g29860 : 156.0) member of WRKY Transcription Factor; Group II-c; WRKY DNA-binding protein 71 (WRKY71); FUNCTIONS IN: sequence-specific DNA binding transcription factor activity; INVOLVED IN: regulation of transcription, DNA-dependent, regulation of transcription; EXPRESSED IN: stem; CONTAINS InterPro DOMAIN/s: DNA-binding WRKY (InterPro:IPR003657), Transcription factor, WRKY group IIc (Inter…	T
'27.3.32'	'RNA.regulation of transcription.WRKY domain transcription factor family'	'zm00001d038023'	'(at2g38470 : 303.0) Member of the plant WRKY transcription factor family. Regulates the antagonistic relationship between defense pathways mediating responses to P. syringae and necrotrophic fungal pathogens. Located in nucleus. Involved in response to various abiotic stresses - especially salt stress.; WRKY DNA-binding protein 33 (WRKY33); CONTAINS InterPro DOMAIN/s: DNA-binding WRKY (InterPro:…	T
'27.3.32'	'RNA.regulation of transcription.WRKY domain transcription factor family'	'zm00001d037607'	'(at5g26170 : 127.0) member of WRKY Transcription Factor; Group II-c; WRKY DNA-binding protein 50 (WRKY50); CONTAINS InterPro DOMAIN/s: DNA-binding WRKY (InterPro:IPR003657); BEST Arabidopsis thaliana protein match is: WRKY DNA-binding protein 51 (TAIR:AT5G64810.1); Has 30201 Blast hits to 17322 proteins in 780 species: Archae - 12; Bacteria - 1396; Metazoa - 17338; Fungi - 3422; Plants - 5037; V…	T
'27.3.32'	'RNA.regulation of transcription.WRKY domain transcription factor family'	'zm00001d024768'	'(at1g62300 : 182.0) Encodes a transcription factor WRKY6. Regulates Phosphate1 (Pho1) expression in response to low phosphate (Pi) stress.; WRKY6; CONTAINS InterPro DOMAIN/s: DNA-binding WRKY (InterPro:IPR003657); BEST Arabidopsis thaliana protein match is: WRKY family transcription factor (TAIR:AT4G04450.1); Has 3824 Blast hits to 3363 proteins in 295 species: Archae - 0; Bacteria - 33; Metazoa…	T
'27.3.32'	'RNA.regulation of transcription.WRKY domain transcription factor family'	'zm00001d022437'	'(at2g46400 : 86.3) member of WRKY Transcription Factor; Group III; WRKY DNA-binding protein 46 (WRKY46); CONTAINS InterPro DOMAIN/s: DNA-binding WRKY (InterPro:IPR003657); BEST Arabidopsis thaliana protein match is: WRKY family transcription factor (TAIR:AT4G23810.1); Has 3385 Blast hits to 2951 proteins in 185 species: Archae - 0; Bacteria - 0; Metazoa - 0; Fungi - 0; Plants - 3370; Viruses - 0…	T
'27.3.32'	'RNA.regulation of transcription.WRKY domain transcription factor family'	'zm00001d016457'	'(at4g31550 : 156.0) member of WRKY Transcription Factor; Group II-d; negative regulator of basal resistance to Pseudomonas syringae.; WRKY DNA-binding protein 11 (WRKY11); CONTAINS InterPro DOMAIN/s: DNA-binding WRKY (InterPro:IPR003657), Transcription factor, WRKY, Zn-cluster (InterPro:IPR018872); BEST Arabidopsis thaliana protein match is: WRKY DNA-binding protein 17 (TAIR:AT2G24570.1); Has 33…	T
'27.3.32'	'RNA.regulation of transcription.WRKY domain transcription factor family'	'zm00001d009939'	'(at5g26170 : 135.0) member of WRKY Transcription Factor; Group II-c; WRKY DNA-binding protein 50 (WRKY50); CONTAINS InterPro DOMAIN/s: DNA-binding WRKY (InterPro:IPR003657); BEST Arabidopsis thaliana protein match is: WRKY DNA-binding protein 51 (TAIR:AT5G64810.1); Has 30201 Blast hits to 17322 proteins in 780 species: Archae - 12; Bacteria - 1396; Metazoa - 17338; Fungi - 3422; Plants - 5037; V…	T
'27.3.32'	'RNA.regulation of transcription.WRKY domain transcription factor family'	'zm00001d009619'	'(at5g24110 : 98.6) member of WRKY Transcription Factor; Group III; WRKY DNA-binding protein 30 (WRKY30); FUNCTIONS IN: sequence-specific DNA binding transcription factor activity; INVOLVED IN: regulation of transcription, DNA-dependent, regulation of transcription; EXPRESSED IN: stem, stamen; EXPRESSED DURING: 4 anthesis; CONTAINS InterPro DOMAIN/s: DNA-binding WRKY (InterPro:IPR003657); BEST Ar…	T
'27.3.32'	'RNA.regulation of transcription.WRKY domain transcription factor family'	'zm00001d008190'	'(at4g04450 : 180.0) member of WRKY Transcription Factor; Group II-b; WRKY42; CONTAINS InterPro DOMAIN/s: DNA-binding WRKY (InterPro:IPR003657); BEST Arabidopsis thaliana protein match is: WRKY DNA-binding protein 31 (TAIR:AT4G22070.1); Has 3599 Blast hits to 3152 proteins in 220 species: Archae - 0; Bacteria - 6; Metazoa - 41; Fungi - 2; Plants - 3474; Viruses - 0; Other Eukaryotes - 76 (source:…	T
'27.3.35'	'RNA.regulation of transcription.bZIP transcription factor family'	'zm00001d046751'	'(at5g06839 : 257.0) bZIP transcription factor family protein; FUNCTIONS IN: DNA binding, sequence-specific DNA binding transcription factor activity; INVOLVED IN: regulation of transcription, DNA-dependent; EXPRESSED IN: leaf whorl, root, flower, seed; EXPRESSED DURING: 4 anthesis, petal differentiation and expansion stage, E expanded cotyledon stage; CONTAINS InterPro DOMAIN/s: Basic-leucine zi…	T
'27.3.35'	'RNA.regulation of transcription.bZIP transcription factor family'	'zm00001d020711'	'(at2g36270 : 133.0) Encodes a member of the basic leucine zipper transcription factor family, involved in ABA signalling during seed maturation and germination. The Arabidopsis abscisic acid (ABA)-insensitive abi5 mutants have pleiotropic defects in ABA response, including decreased sensitivity to ABA inhibition of germination and altered expression of some ABA-regulated genes. Comparison of see…	T
'27.3.36'	'RNA.regulation of transcription.Argonaute'	'zm00001d026300'	'(at1g31280 : 584.0) An Argonaute gene; argonaute 2 (AGO2); FUNCTIONS IN: nucleic acid binding; INVOLVED IN: biological_process unknown; LOCATED IN: cellular_component unknown; EXPRESSED IN: 21 plant structures; EXPRESSED DURING: 12 growth stages; CONTAINS InterPro DOMAIN/s: Domain of unknown function DUF1785 (InterPro:IPR014811), Stem cell self-renewal protein Piwi (InterPro:IPR003165), Argonaut…	T
'27.3.37'	'RNA.regulation of transcription.AS2,Lateral Organ Boundaries Gene Family'	'zm00001d033335'	'(at5g66870 : 177.0) Encodes LOB domain protein whose overexpression results in KNOX gene repression. Overexpression also results in plants with hyponastic leaves, downward pointing flowers and reduced apical dominance. May be involved in the transcriptional regulation of the homeobox gene BP (brevipedicellus) during lateral organ differentiation. Acts together with AS2 in proximal-distal symmetr…	T
'27.3.37'	'RNA.regulation of transcription.AS2,Lateral Organ Boundaries Gene Family'	'zm00001d013625'	'(at1g31320 : 120.0) LOB domain-containing protein 4 (LBD4); CONTAINS InterPro DOMAIN/s: Lateral organ boundaries, LOB (InterPro:IPR004883); BEST Arabidopsis thaliana protein match is: ASYMMETRIC LEAVES 2-like 9 (TAIR:AT1G16530.1); Has 1039 Blast hits to 1034 proteins in 25 species: Archae - 0; Bacteria - 0; Metazoa - 0; Fungi - 0; Plants - 1039; Viruses - 0; Other Eukaryotes - 0 (source: NCBI BL…	T
'27.3.4'	'RNA.regulation of transcription.ARF, Auxin Response Factor family'	'zm00001d032131'	'(at5g62000 : 95.5) Encodes an auxin response factor. Mutants have many defects including enlarged rosette leaves, reduced fertility, later senescence, hypocotyl elongation defects, enlarged seeds and enlarged cotyledons. May not mediate auxin effects. Increase in seed size due to increased cell proliferation.; auxin response factor 2 (ARF2); FUNCTIONS IN: protein binding, sequence-specific DNA b…	T
'27.3.40'	'RNA.regulation of transcription.Aux/IAA family'	'zm00001d016277'	'(q6h543|iaa7_orysa : 297.0) Auxin-responsive protein IAA7 (Indoleacetic acid-induced protein 7) - Oryza sativa (Rice) & (at3g16500 : 182.0) phytochrome-associated protein 1 (PAP1); phytochrome-associated protein 1 (PAP1); FUNCTIONS IN: sequence-specific DNA binding transcription factor activity; INVOLVED IN: response to auxin stimulus; LOCATED IN: nucleus; EXPRESSED IN: 22 plant structures; EXPR…	T
'27.3.5'	'RNA.regulation of transcription.ARR'	'zm00001d042463'	'(at1g67710 : 314.0) Encodes an Arabidopsis response regulator (ARR) protein that acts in concert with other type-B ARRs in the cytokinin signaling pathway.; response regulator 11 (ARR11); CONTAINS InterPro DOMAIN/s: Response regulator, plant B-type (InterPro:IPR017053), Myb-like DNA-binding domain, SHAQKYF class (InterPro:IPR006447), CheY-like (InterPro:IPR011006), Myb, DNA-binding (InterPro:IPR…	T
'27.3.5'	'RNA.regulation of transcription.ARR'	'zm00001d012128'	'(at1g67710 : 322.0) Encodes an Arabidopsis response regulator (ARR) protein that acts in concert with other type-B ARRs in the cytokinin signaling pathway.; response regulator 11 (ARR11); CONTAINS InterPro DOMAIN/s: Response regulator, plant B-type (InterPro:IPR017053), Myb-like DNA-binding domain, SHAQKYF class (InterPro:IPR006447), CheY-like (InterPro:IPR011006), Myb, DNA-binding (InterPro:IPR…	T
'27.3.55'	'RNA.regulation of transcription.HDA'	'zm00001d042974'	'(at4g33470 : 447.0) Encodes HDA14, a member of the histone deacetylase family proteins.; histone deacetylase 14 (hda14); FUNCTIONS IN: histone deacetylase activity; INVOLVED IN: histone deacetylation; LOCATED IN: chloroplast; EXPRESSED IN: 20 plant structures; EXPRESSED DURING: 13 growth stages; CONTAINS InterPro DOMAIN/s: Histone deacetylase superfamily (InterPro:IPR000286); BEST Arabidopsis th…	T
'27.3.6'	'RNA.regulation of transcription.bHLH,Basic Helix-Loop-Helix family'	'zm00001d053895'	'(at2g16910 : 137.0) Encodes a basic helix-loop helix transcription factor involved in tapetal cell development. Loss of function mutations are male sterile. AMS binds to a region termed the E box of target gene promoters.; ABORTED MICROSPORES (AMS); FUNCTIONS IN: DNA binding, sequence-specific DNA binding transcription factor activity; INVOLVED IN: tapetal layer development, regulation of transc…	T
'27.3.6'	'RNA.regulation of transcription.bHLH,Basic Helix-Loop-Helix family'	'zm00001d027987'	'(at1g72210 : 180.0) basic helix-loop-helix (bHLH) DNA-binding superfamily protein; FUNCTIONS IN: DNA binding, sequence-specific DNA binding transcription factor activity; INVOLVED IN: regulation of transcription; LOCATED IN: nucleus; CONTAINS InterPro DOMAIN/s: Helix-loop-helix DNA-binding domain (InterPro:IPR001092), Helix-loop-helix DNA-binding (InterPro:IPR011598); BEST Arabidopsis thaliana p…	T
'27.3.6'	'RNA.regulation of transcription.bHLH,Basic Helix-Loop-Helix family'	'zm00001d026097'	'(at2g27230 : 230.0) Encodes a nuclear-localized transcriptional activator with weak sequence similarity to basic helix-loop-helix(bHLH)-domain proteins. It promotes the production of stele cells in root meristems and is required to establish and maintain the normal vascular cell number and pattern in primary and lateral roots.; LONESOME HIGHWAY (LHW); CONTAINS InterPro DOMAIN/s: Helix-loop-helix…	T
'27.3.6'	'RNA.regulation of transcription.bHLH,Basic Helix-Loop-Helix family'	'zm00001d020705'	'(at5g67060 : 133.0) HECATE 1 (HEC1); FUNCTIONS IN: sequence-specific DNA binding transcription factor activity; INVOLVED IN: transmitting tissue development, carpel formation, regulation of transcription; LOCATED IN: nucleus; EXPRESSED IN: 9 plant structures; EXPRESSED DURING: 6 growth stages; CONTAINS InterPro DOMAIN/s: Helix-loop-helix DNA-binding domain (InterPro:IPR001092), Helix-loop-helix …	T
'27.3.62'	'RNA.regulation of transcription.Nucleosome/chromatin assembly factor group'	'zm00001d016827'	'(at5g08630 : 239.0) DDT domain-containing protein; CONTAINS InterPro DOMAIN/s: DDT domain superfamily (InterPro:IPR018501), DDT domain (InterPro:IPR004022), DDT domain, subgroup (InterPro:IPR018500), WSTF/Acf1/Cbp146 (InterPro:IPR013136); Has 7496 Blast hits to 4698 proteins in 418 species: Archae - 4; Bacteria - 337; Metazoa - 2683; Fungi - 719; Plants - 380; Viruses - 89; Other Eukaryotes - 32…	T
'27.3.64'	'RNA.regulation of transcription.PHOR1'	'zm00001d050712'	'(at3g19380 : 178.0) plant U-box 25 (PUB25); FUNCTIONS IN: ubiquitin-protein ligase activity, binding; INVOLVED IN: response to chitin; LOCATED IN: ubiquitin ligase complex; EXPRESSED IN: 22 plant structures; EXPRESSED DURING: 12 growth stages; CONTAINS InterPro DOMAIN/s: U box domain (InterPro:IPR003613), Armadillo-like helical (InterPro:IPR011989), Armadillo-type fold (InterPro:IPR016024); BEST…	T
'27.3.64'	'RNA.regulation of transcription.PHOR1'	'zm00001d044734'	'(at5g37490 : 155.0) ARM repeat superfamily protein; FUNCTIONS IN: ubiquitin-protein ligase activity, binding; INVOLVED IN: response to chitin; LOCATED IN: ubiquitin ligase complex; EXPRESSED IN: 14 plant structures; EXPRESSED DURING: 7 growth stages; CONTAINS InterPro DOMAIN/s: U box domain (InterPro:IPR003613), Armadillo-like helical (InterPro:IPR011989), Armadillo-type fold (InterPro:IPR016024…	T
'27.3.67'	'RNA.regulation of transcription.putative transcription regulator'	'zm00001d045759'	'(at3g12860 : 86.7) NOP56-like pre RNA processing ribonucleoprotein; CONTAINS InterPro DOMAIN/s: Pre-mRNA processing ribonucleoprotein, snoRNA-binding domain (InterPro:IPR002687), NOP5, N-terminal (InterPro:IPR012974), NOSIC (InterPro:IPR012976); BEST Arabidopsis thaliana protein match is: homolog of nucleolar protein NOP56 (TAIR:AT1G56110.1); Has 9295 Blast hits to 5418 proteins in 524 species: …	T
'27.3.67'	'RNA.regulation of transcription.putative transcription regulator'	'zm00001d024713'	'(at5g60170 : 131.0) RNA binding (RRM/RBD/RNP motifs) family protein; FUNCTIONS IN: RNA binding, nucleotide binding, zinc ion binding, nucleic acid binding; INVOLVED IN: biological_process unknown; LOCATED IN: cellular_component unknown; EXPRESSED IN: 24 plant structures; EXPRESSED DURING: 15 growth stages; CONTAINS InterPro DOMAIN/s: Zinc finger, RING-type (InterPro:IPR001841), RNA recognition m…	T
'27.3.67'	'RNA.regulation of transcription.putative transcription regulator'	'zm00001d022198'	'(at4g39680 : 288.0) SAP domain-containing protein; FUNCTIONS IN: DNA binding, nucleic acid binding; INVOLVED IN: biological_process unknown; LOCATED IN: cytosol, nucleus; EXPRESSED IN: 26 plant structures; EXPRESSED DURING: 14 growth stages; CONTAINS InterPro DOMAIN/s: DNA-binding SAP (InterPro:IPR003034); Has 10985 Blast hits to 6880 proteins in 693 species: Archae - 26; Bacteria - 1256; Metazo…	T
'27.3.69'	'RNA.regulation of transcription.SET-domain transcriptional regulator family'	'zm00001d032204'	'(at1g26761 : 263.0) Arabinanase/levansucrase/invertase; FUNCTIONS IN: molecular_function unknown; INVOLVED IN: biological_process unknown; LOCATED IN: chloroplast; Has 30201 Blast hits to 17322 proteins in 780 species: Archae - 12; Bacteria - 1396; Metazoa - 17338; Fungi - 3422; Plants - 5037; Viruses - 0; Other Eukaryotes - 2996 (source: NCBI BLink). & (reliability: 526.0) & (original descripti…	T
'27.3.73'	'RNA.regulation of transcription.Zn-finger(CCHC)'	'zm00001d014885'	'(at3g02820 : 174.0) zinc knuckle (CCHC-type) family protein; FUNCTIONS IN: zinc ion binding, nucleic acid binding; INVOLVED IN: cell cycle, replication fork protection, response to DNA damage stimulus; LOCATED IN: nucleus, chloroplast; EXPRESSED IN: 20 plant structures; EXPRESSED DURING: 15 growth stages; CONTAINS InterPro DOMAIN/s: Replication fork protection component Swi3 (InterPro:IPR012923)…	T
'27.3.8'	'RNA.regulation of transcription.C2C2(Zn) DOF zinc finger family'	'zm00001d026096'	'(at4g24060 : 136.0) Dof-type zinc finger DNA-binding family protein; CONTAINS InterPro DOMAIN/s: Zinc finger, Dof-type (InterPro:IPR003851); BEST Arabidopsis thaliana protein match is: Dof-type zinc finger DNA-binding family protein (TAIR:AT1G64620.1); Has 30201 Blast hits to 17322 proteins in 780 species: Archae - 12; Bacteria - 1396; Metazoa - 17338; Fungi - 3422; Plants - 5037; Viruses - 0; O…	T
'27.3.99'	'RNA.regulation of transcription.unclassified'	'zm00001d049743'	'(at4g38160 : 370.0) pigment defective 191 (pde191); FUNCTIONS IN: molecular_function unknown; INVOLVED IN: biological_process unknown; LOCATED IN: cellular_component unknown; EXPRESSED IN: 21 plant structures; EXPRESSED DURING: 13 growth stages; CONTAINS InterPro DOMAIN/s: Mitochodrial transcription termination factor-related (InterPro:IPR003690); BEST Arabidopsis thaliana protein match is: Mito…	T
'27.3.99'	'RNA.regulation of transcription.unclassified'	'zm00001d047837'	'(at2g39830 : 444.0) DA1-related protein 2 (DAR2); FUNCTIONS IN: zinc ion binding; LOCATED IN: chloroplast; EXPRESSED IN: 23 plant structures; EXPRESSED DURING: 13 growth stages; CONTAINS InterPro DOMAIN/s: Zinc finger, LIM-type (InterPro:IPR001781), Protein of unknown function DUF3633 (InterPro:IPR022087); BEST Arabidopsis thaliana protein match is: LIM domain-containing protein (TAIR:AT4G36860.…	T
'27.3.99'	'RNA.regulation of transcription.unclassified'	'zm00001d037860'	'(at3g56330 : 381.0) N2,N2-dimethylguanosine tRNA methyltransferase; FUNCTIONS IN: RNA binding, tRNA (guanine-N2-)-methyltransferase activity; INVOLVED IN: tRNA processing; EXPRESSED IN: 20 plant structures; EXPRESSED DURING: 12 growth stages; CONTAINS InterPro DOMAIN/s: N2,N2-dimethylguanosine tRNA methyltransferase (InterPro:IPR002905); BEST Arabidopsis thaliana protein match is: N2,N2-dimethyl…	T
'27.3.99'	'RNA.regulation of transcription.unclassified'	'zm00001d025218'	'(at1g67340 : 300.0) HCP-like superfamily protein with MYND-type zinc finger; FUNCTIONS IN: binding, zinc ion binding; INVOLVED IN: biological_process unknown; LOCATED IN: nucleus; EXPRESSED IN: 23 plant structures; EXPRESSED DURING: 13 growth stages; CONTAINS InterPro DOMAIN/s: Zinc finger, MYND-type (InterPro:IPR002893), Tetratricopeptide-like helical (InterPro:IPR011990), Sel1-like (InterPro:I…	T
'27.3.99'	'RNA.regulation of transcription.unclassified'	'zm00001d021403'	'(at2g02070 : 325.0) indeterminate(ID)-domain 5 (IDD5); FUNCTIONS IN: sequence-specific DNA binding transcription factor activity, zinc ion binding, nucleic acid binding; INVOLVED IN: regulation of transcription; LOCATED IN: intracellular, chloroplast; EXPRESSED IN: 22 plant structures; EXPRESSED DURING: 13 growth stages; CONTAINS InterPro DOMAIN/s: Zinc finger, C2H2-like (InterPro:IPR015880), Zi…	T
'27.3.99'	'RNA.regulation of transcription.unclassified'	'zm00001d020886'	'(at5g10770 : 349.0) Eukaryotic aspartyl protease family protein; FUNCTIONS IN: DNA binding, aspartic-type endopeptidase activity; INVOLVED IN: proteolysis; EXPRESSED IN: 12 plant structures; EXPRESSED DURING: 4 anthesis, C globular stage, petal differentiation and expansion stage, E expanded cotyledon stage; CONTAINS InterPro DOMAIN/s: Peptidase aspartic (InterPro:IPR021109), Peptidase aspartic,…	T
'27.3.99'	'RNA.regulation of transcription.unclassified'	'zm00001d019898'	'(p82277|rrp2_spiol : 176.0) Plastid-specific 30S ribosomal protein 2, chloroplast precursor (PSRP-2) - Spinacia oleracea (Spinach) & (at3g52150 : 167.0) RNA-binding (RRM/RBD/RNP motifs) family protein; FUNCTIONS IN: RNA binding, nucleotide binding, nucleic acid binding; LOCATED IN: thylakoid, chloroplast; EXPRESSED IN: 24 plant structures; EXPRESSED DURING: 14 growth stages; CONTAINS InterPro DO…	T
'27.3.99'	'RNA.regulation of transcription.unclassified'	'zm00001d018190'	'(at2g40830 : 145.0) Encodes a putative RING-H2 finger protein RHC1a.; RING-H2 finger C1A (RHC1A); FUNCTIONS IN: zinc ion binding; LOCATED IN: cell wall; EXPRESSED IN: 22 plant structures; EXPRESSED DURING: 13 growth stages; CONTAINS InterPro DOMAIN/s: Zinc finger, RING-type (InterPro:IPR001841), Zinc finger, C3HC4 RING-type (InterPro:IPR018957); BEST Arabidopsis thaliana protein match is: RING/U…	T
'27.3.99'	'RNA.regulation of transcription.unclassified'	'zm00001d017130'	'(at4g14605 : 461.0) Mitochondrial transcription termination factor family protein; CONTAINS InterPro DOMAIN/s: Mitochodrial transcription termination factor-related (InterPro:IPR003690); BEST Arabidopsis thaliana protein match is: Mitochondrial transcription termination factor family protein (TAIR:AT2G21710.1); Has 1482 Blast hits to 884 proteins in 83 species: Archae - 0; Bacteria - 0; Metazoa …	T
'27.3.99'	'RNA.regulation of transcription.unclassified'	'zm00001d015095'	'(at4g17600 : 243.0) Encodes Lil3:1 (light-harvesting-like) protein. Belongs to the Lhc super-gene family encodes the light-harvesting chlorophyll a/b-binding (LHC) proteins that constitute the antenna system of the photosynthetic apparatus. A generic LHC motif is present in Lil3:1.; LIL3:1; FUNCTIONS IN: sequence-specific DNA binding transcription factor activity; INVOLVED IN: regulation of tran…	T
'27.4'	'RNA.RNA binding'	'zm00001d049676'	'(at1g32790 : 318.0) RNA-binding protein, putative, similar to RNA-binding protein GB:CAB40027 GI:4539439 from (Arabidopsis thaliana).Member of a family of PAB2 binding domain proteins.; CTC-interacting domain 11 (CID11); FUNCTIONS IN: RNA binding, nucleotide binding, nucleic acid binding; INVOLVED IN: biological_process unknown; EXPRESSED IN: 22 plant structures; EXPRESSED DURING: 13 growth stag…	T
'27.4'	'RNA.RNA binding'	'zm00001d039451'	'(at1g55140 : 97.4) Ribonuclease III family protein; FUNCTIONS IN: RNA binding, ribonuclease III activity; INVOLVED IN: RNA processing; LOCATED IN: chloroplast; CONTAINS InterPro DOMAIN/s: Ribonuclease III (InterPro:IPR000999); BEST Arabidopsis thaliana protein match is: Ribonuclease III family protein (TAIR:AT3G13740.1); Has 289 Blast hits to 288 proteins in 138 species: Archae - 0; Bacteria - 2…	T
'27.4'	'RNA.RNA binding'	'zm00001d029325'	'(at2g37220 : 239.0) Encodes a chloroplast RNA binding protein. A substrate of the type III effector HopU1 (mono-ADP-ribosyltransferase). Protein is tyrosine-phosphorylated and its phosphorylation state is modulated in response to ABA in Arabidopsis thaliana seeds.; RNA-binding (RRM/RBD/RNP motifs) family protein; FUNCTIONS IN: RNA binding, poly(U) RNA binding; INVOLVED IN: response to cold, resp…	T
'27.4'	'RNA.RNA binding'	'zm00001d026528'	'(at1g17370 : 286.0) oligouridylate binding protein 1B (UBP1B); FUNCTIONS IN: mRNA 3'-UTR binding; EXPRESSED IN: 23 plant structures; EXPRESSED DURING: 13 growth stages; CONTAINS InterPro DOMAIN/s: RNA recognition motif, RNP-1 (InterPro:IPR000504), Nucleotide-binding, alpha-beta plait (InterPro:IPR012677); BEST Arabidopsis thaliana protein match is: RNA-binding (RRM/RBD/RNP motifs) family protein…	T
'27.4'	'RNA.RNA binding'	'zm00001d026522'	'(at1g17370 : 168.0) oligouridylate binding protein 1B (UBP1B); FUNCTIONS IN: mRNA 3'-UTR binding; EXPRESSED IN: 23 plant structures; EXPRESSED DURING: 13 growth stages; CONTAINS InterPro DOMAIN/s: RNA recognition motif, RNP-1 (InterPro:IPR000504), Nucleotide-binding, alpha-beta plait (InterPro:IPR012677); BEST Arabidopsis thaliana protein match is: RNA-binding (RRM/RBD/RNP motifs) family protein…	T
'27.4'	'RNA.RNA binding'	'zm00001d024713'	'(at5g60170 : 131.0) RNA binding (RRM/RBD/RNP motifs) family protein; FUNCTIONS IN: RNA binding, nucleotide binding, zinc ion binding, nucleic acid binding; INVOLVED IN: biological_process unknown; LOCATED IN: cellular_component unknown; EXPRESSED IN: 24 plant structures; EXPRESSED DURING: 15 growth stages; CONTAINS InterPro DOMAIN/s: Zinc finger, RING-type (InterPro:IPR001841), RNA recognition m…	T
'27.4'	'RNA.RNA binding'	'zm00001d015519'	'(at1g70200 : 117.0) RNA-binding (RRM/RBD/RNP motifs) family protein; FUNCTIONS IN: nucleic acid binding; LOCATED IN: chloroplast; EXPRESSED IN: 23 plant structures; EXPRESSED DURING: 13 growth stages; CONTAINS InterPro DOMAIN/s: RNA recognition motif, RNP-1 (InterPro:IPR000504); Has 4744 Blast hits to 3664 proteins in 382 species: Archae - 19; Bacteria - 294; Metazoa - 1723; Fungi - 497; Plants …	T
'27.4'	'RNA.RNA binding'	'zm00001d013419'	'(at4g17720 : 275.0) RNA-binding (RRM/RBD/RNP motifs) family protein; FUNCTIONS IN: oxidoreductase activity, nucleotide binding, nucleic acid binding; INVOLVED IN: oxidation reduction; EXPRESSED IN: 24 plant structures; EXPRESSED DURING: 15 growth stages; CONTAINS InterPro DOMAIN/s: Aldo/keto reductase (InterPro:IPR001395), RNA recognition motif, RNP-1 (InterPro:IPR000504), Nucleotide-binding, al…	T
'27.4'	'RNA.RNA binding'	'zm00001d012517'	'(at3g08620 : 304.0) RNA-binding KH domain-containing protein; FUNCTIONS IN: RNA binding, nucleic acid binding; INVOLVED IN: biological_process unknown; EXPRESSED IN: 22 plant structures; EXPRESSED DURING: 13 growth stages; CONTAINS InterPro DOMAIN/s: K Homology, type 1, subgroup (InterPro:IPR018111), K Homology (InterPro:IPR004087), K Homology, type 1 (InterPro:IPR004088); BEST Arabidopsis thali…	T
'27.4'	'RNA.RNA binding'	'zm00001d009740'	'(at4g16830 : 145.0) Hyaluronan / mRNA binding family; FUNCTIONS IN: RNA binding; INVOLVED IN: biological_process unknown; LOCATED IN: nucleus, cytoplasm; EXPRESSED IN: 22 plant structures; EXPRESSED DURING: 13 growth stages; CONTAINS InterPro DOMAIN/s: Hyaluronan/mRNA-binding protein (InterPro:IPR006861); BEST Arabidopsis thaliana protein match is: Hyaluronan / mRNA binding family (TAIR:AT4G1752…	T
'27.4'	'RNA.RNA binding'	'zm00001d006103'	'(at3g26932 : 241.0) dsRNA-binding protein 3 (DRB3); FUNCTIONS IN: double-stranded RNA binding, RNA binding; INVOLVED IN: biological_process unknown; LOCATED IN: intracellular; EXPRESSED IN: 16 plant structures; EXPRESSED DURING: 9 growth stages; CONTAINS InterPro DOMAIN/s: Double-stranded RNA-binding (InterPro:IPR001159), Double-stranded RNA-binding-like (InterPro:IPR014720); BEST Arabidopsis th…	T
'27.4'	'RNA.RNA binding'	'zm00001d002490'	'(at2g35410 : 158.0) RNA-binding (RRM/RBD/RNP motifs) family protein; FUNCTIONS IN: RNA binding, nucleotide binding, nucleic acid binding; LOCATED IN: thylakoid, chloroplast stroma, chloroplast; EXPRESSED IN: 23 plant structures; EXPRESSED DURING: 14 growth stages; CONTAINS InterPro DOMAIN/s: RNA recognition motif, RNP-1 (InterPro:IPR000504), Nucleotide-binding, alpha-beta plait (InterPro:IPR0126…	T
'27.4'	'RNA.RNA binding'	'novel00375'	'(at3g14100 : 187.0) RNA-binding (RRM/RBD/RNP motifs) family protein; FUNCTIONS IN: mRNA 3'-UTR binding; EXPRESSED IN: 25 plant structures; EXPRESSED DURING: 14 growth stages; CONTAINS InterPro DOMAIN/s: RNA recognition motif, RNP-1 (InterPro:IPR000504), Nucleotide-binding, alpha-beta plait (InterPro:IPR012677); BEST Arabidopsis thaliana protein match is: oligouridylate-binding protein 1A (TAIR:A…	T
'28.1'	'DNA.synthesis/chromatin structure'	'zm00001d038851'	'(at2g19480 : 438.0) This gene is predicted to encode a nucleosome assembly protein. Plant lines expressing an RNAi construct directed against this gene show a reduction in agrobacterium-mediated root transformation.; nucleosome assembly protein 1;2 (NAP1;2); CONTAINS InterPro DOMAIN/s: Nucleosome assembly protein (NAP) (InterPro:IPR002164); BEST Arabidopsis thaliana protein match is: nucleosome …	T
'28.1'	'DNA.synthesis/chromatin structure'	'zm00001d032790'	'(at3g04260 : 957.0) plastid transcriptionally active 3 (PTAC3); FUNCTIONS IN: DNA binding, nucleic acid binding; LOCATED IN: plastid chromosome, nucleus, chloroplast, nucleoid, membrane; EXPRESSED IN: 22 plant structures; EXPRESSED DURING: 13 growth stages; CONTAINS InterPro DOMAIN/s: DNA-binding SAP (InterPro:IPR003034); BEST Arabidopsis thaliana protein match is: genomes uncoupled 1 (TAIR:AT2G…	T
'28.1'	'DNA.synthesis/chromatin structure'	'zm00001d017720'	'(at3g23890 : 1553.0) Encodes a topoisomerase II that is highly expressed in young seedlings. The protein is localized in the nucleus and gene expression levels are increased in proliferative tissues.; topoisomerase II (TOPII); CONTAINS InterPro DOMAIN/s: DNA topoisomerase, type IIA, subunit A/C-terminal (InterPro:IPR002205), DNA topoisomerase, type IIA, conserved site (InterPro:IPR018522), DNA t…	T
'28.1'	'DNA.synthesis/chromatin structure'	'zm00001d016280'	'(at2g30460 : 118.0) Nucleotide/sugar transporter family protein; FUNCTIONS IN: molecular_function unknown; INVOLVED IN: biological_process unknown; LOCATED IN: endomembrane system, membrane; EXPRESSED IN: 24 plant structures; EXPRESSED DURING: 15 growth stages; CONTAINS InterPro DOMAIN/s: Protein of unknown function DUF250 (InterPro:IPR004853); BEST Arabidopsis thaliana protein match is: nodulin…	T
'28.1'	'DNA.synthesis/chromatin structure'	'zm00001d015031'	'(at1g51080 : 95.5) unknown protein; FUNCTIONS IN: molecular_function unknown; INVOLVED IN: biological_process unknown; LOCATED IN: chloroplast; EXPRESSED IN: 15 plant structures; EXPRESSED DURING: 11 growth stages; Has 101 Blast hits to 98 proteins in 44 species: Archae - 0; Bacteria - 0; Metazoa - 38; Fungi - 10; Plants - 27; Viruses - 0; Other Eukaryotes - 26 (source: NCBI BLink). & (reliabili…	T
'28.1'	'DNA.synthesis/chromatin structure'	'zm00001d014568'	'(at5g44750 : 334.0) Homologous to Y-family DNA polymerases, contains BRCT domain. Mutants are sensitive to UV-B radiation. Gene is involved in damage-tolerance mechanisms through translesion synthesis(TLS).; REV1; FUNCTIONS IN: DNA-directed DNA polymerase activity; INVOLVED IN: DNA repair, response to UV-B, response to DNA damage stimulus; LOCATED IN: intracellular, chloroplast; EXPRESSED IN: 24…	T
'28.1'	'DNA.synthesis/chromatin structure'	'zm00001d014271'	'(at3g50360 : 187.0) centrin2 (CEN2); FUNCTIONS IN: calcium ion binding; INVOLVED IN: biological_process unknown; LOCATED IN: plasma membrane; EXPRESSED IN: 24 plant structures; EXPRESSED DURING: 15 growth stages; CONTAINS InterPro DOMAIN/s: EF-Hand 1, calcium-binding site (InterPro:IPR018247), EF-HAND 2 (InterPro:IPR018249), EF-hand-like domain (InterPro:IPR011992), Calcium-binding EF-hand (Inte…	T
'28.1'	'DNA.synthesis/chromatin structure'	'zm00001d014207'	'(at1g11800 : 86.3) endonuclease/exonuclease/phosphatase family protein; FUNCTIONS IN: hydrolase activity, zinc ion binding; LOCATED IN: intracellular; EXPRESSED IN: 24 plant structures; EXPRESSED DURING: 15 growth stages; CONTAINS InterPro DOMAIN/s: Endonuclease/exonuclease/phosphatase (InterPro:IPR005135), Zinc finger, RanBP2-type (InterPro:IPR001876); Has 386 Blast hits to 366 proteins in 96 s…	T
'28.1.3.1'	'DNA.synthesis/chromatin structure.histone.H1'	'zm00001d034479'	'(p23444|h1_maize : 126.0) Histone H1 - Zea mays (Maize) & (at1g06760 : 90.5) winged-helix DNA-binding transcription factor family protein; FUNCTIONS IN: DNA binding; INVOLVED IN: nucleosome assembly; LOCATED IN: nucleus, nucleosome; EXPRESSED IN: 23 plant structures; EXPRESSED DURING: 13 growth stages; CONTAINS InterPro DOMAIN/s: Winged helix-turn-helix transcription repressor DNA-binding (Inter…	T
'28.1.3.2.1'	'DNA.synthesis/chromatin structure.histone.core.H2A'	'zm00001d019045'	'(p19177|h2a_petcr : 159.0) Histone H2A - Petroselinum crispum (Parsley) (Petroselinum hortense) & (at5g02560 : 151.0) Encodes HTA12, a histone H2A protein.; histone H2A 12 (HTA12); FUNCTIONS IN: DNA binding; INVOLVED IN: nucleosome assembly; LOCATED IN: nucleus, nucleosome; EXPRESSED IN: 22 plant structures; EXPRESSED DURING: 13 growth stages; CONTAINS InterPro DOMAIN/s: Histone H2A (InterPro:IP…	T
'28.1.3.2.4'	'DNA.synthesis/chromatin structure.histone.core.H4'	'zm00001d021422'	'(at5g59970 : 162.0) Histone superfamily protein; FUNCTIONS IN: DNA binding; INVOLVED IN: nucleosome assembly; LOCATED IN: vacuole; CONTAINS InterPro DOMAIN/s: Histone H4, conserved site (InterPro:IPR019809), Histone-fold (InterPro:IPR009072), Histone core (InterPro:IPR007125), Histone H4 (InterPro:IPR001951); BEST Arabidopsis thaliana protein match is: Histone superfamily protein (TAIR:AT5G59690…	T
'28.2'	'DNA.repair'	'zm00001d038438'	'(at1g19025 : 239.0) DNA repair metallo-beta-lactamase family protein; CONTAINS InterPro DOMAIN/s: DNA repair metallo-beta-lactamase (InterPro:IPR011084); BEST Arabidopsis thaliana protein match is: DNA repair metallo-beta-lactamase family protein (TAIR:AT1G27410.1); Has 1078 Blast hits to 1060 proteins in 342 species: Archae - 34; Bacteria - 280; Metazoa - 259; Fungi - 220; Plants - 166; Viruses…	T
'28.2'	'DNA.repair'	'zm00001d016801'	'(at1g21710 : 285.0) Encodes 8-oxoguanine-DNA glycosylase. DNA repair enzyme.; 8-oxoguanine-DNA glycosylase 1 (OGG1); FUNCTIONS IN: oxidized purine base lesion DNA N-glycosylase activity; INVOLVED IN: DNA repair, base-excision repair; LOCATED IN: chloroplast; EXPRESSED IN: 22 plant structures; EXPRESSED DURING: 14 growth stages; CONTAINS InterPro DOMAIN/s: DNA glycosylase (InterPro:IPR011257), He…	T
'28.99'	'DNA.unspecified'	'zm00001d027245'	'(at5g28780 : 139.0) PIF1 helicase; CONTAINS InterPro DOMAIN/s: DNA helicase PIF1, ATP-dependent (InterPro:IPR010285); BEST Arabidopsis thaliana protein match is: PIF1 helicase (TAIR:AT3G51690.1); Has 1364 Blast hits to 1355 proteins in 303 species: Archae - 2; Bacteria - 367; Metazoa - 234; Fungi - 111; Plants - 389; Viruses - 9; Other Eukaryotes - 252 (source: NCBI BLink). & (reliability: 262.0…	T
'28.99'	'DNA.unspecified'	'zm00001d027233'	'(at3g51700 : 126.0) PIF1 helicase; CONTAINS InterPro DOMAIN/s: DNA helicase PIF1, ATP-dependent (InterPro:IPR010285); BEST Arabidopsis thaliana protein match is: PIF1 helicase (TAIR:AT3G51690.1); Has 1335 Blast hits to 1330 proteins in 296 species: Archae - 2; Bacteria - 310; Metazoa - 217; Fungi - 167; Plants - 426; Viruses - 5; Other Eukaryotes - 208 (source: NCBI BLink). & (reliability: 252.0…	T
'28.99'	'DNA.unspecified'	'zm00001d015283'	'(p03010|trac9_maize : 140.0) Putative AC9 transposase - Zea mays (Maize) & (at3g42170 : 121.0) transposase-like gene with conserved domains from the family of hAT transposases that includes hobo from Drosophila melanogaster, Activator (Ac) from maize, and Tam3 from snapdragon but lacks several amino acids known to be essential for Ac transposition5. The DAYSLEEPER gene lacks 8 bp duplications an…	T
'28.99'	'DNA.unspecified'	'zm00001d015212'	'(p10978|polx_tobac : 145.0) Retrovirus-related Pol polyprotein from transposon TNT 1-94 [Includes: Protease (EC 3.4.23.-); Reverse transcriptase (EC 2.7.7.49); Endonuclease] - Nicotiana tabacum (Common tobacco) & (atmg00810 : 120.0) hypothetical protein; DNA/RNA polymerases superfamily protein; CONTAINS InterPro DOMAIN/s: Reverse transcriptase, RNA-dependent DNA polymerase (InterPro:IPR013103); …	T
'28.99'	'DNA.unspecified'	'novel00173'	'(p08770|tra1_maize : 502.0) Putative AC transposase (ORFA) - Zea mays (Maize) & (at3g42170 : 173.0) transposase-like gene with conserved domains from the family of hAT transposases that includes hobo from Drosophila melanogaster, Activator (Ac) from maize, and Tam3 from snapdragon but lacks several amino acids known to be essential for Ac transposition5. The DAYSLEEPER gene lacks 8 bp duplicatio…	T
'28.99'	'DNA.unspecified'	'novel00020'	'(p08770|tra1_maize : 137.0) Putative AC transposase (ORFA) - Zea mays (Maize) & (at3g42170 : 80.5) transposase-like gene with conserved domains from the family of hAT transposases that includes hobo from Drosophila melanogaster, Activator (Ac) from maize, and Tam3 from snapdragon but lacks several amino acids known to be essential for Ac transposition5. The DAYSLEEPER gene lacks 8 bp duplication…	T
'29.1.16'	'protein.aa activation.cysteine-tRNA ligase'	'zm00001d026305'	'(at2g31170 : 153.0) SYCO ARATH; FUNCTIONS IN: cysteine-tRNA ligase activity, nucleotide binding, aminoacyl-tRNA ligase activity, ATP binding; INVOLVED IN: cysteinyl-tRNA aminoacylation, translation, tRNA aminoacylation for protein translation; LOCATED IN: mitochondrion, chloroplast; EXPRESSED IN: 21 plant structures; EXPRESSED DURING: 13 growth stages; CONTAINS InterPro DOMAIN/s: Rossmann-like a…	T
'29.1.17'	'protein.aa activation.glutamate-tRNA ligase'	'zm00001d015037'	'(q43768|sye_horvu : 884.0) Glutamyl-tRNA synthetase (EC 6.1.1.17) (Glutamate--tRNA ligase) (GluRS) - Hordeum vulgare (Barley) & (at5g64050 : 822.0) Glutamate-tRNA ligase. Targeted to mitochondria and chloroplast. Its inactivation causes developmental arrest of chloroplasts and mitochondria in Nicotiana benthamiana.; glutamate tRNA synthetase (ERS); FUNCTIONS IN: protein binding, glutamate-tRNA l…	T
'29.1.3'	'protein.aa activation.threonine-tRNA ligase'	'zm00001d021962'	'(at2g04842 : 931.0) Encodes a dual localized threonyl-tRNA synthetase found both in the mitochondrion and the chloroplast. Plants mutated in this gene terminate as embryos in the globular stage.; EMBRYO DEFECTIVE 2761 (EMB2761); FUNCTIONS IN: ligase activity, forming aminoacyl-tRNA and related compounds, nucleotide binding, aminoacyl-tRNA ligase activity, threonine-tRNA ligase activity, ATP bind…	T
'29.1.30'	'protein.aa activation.pseudouridylate synthase'	'zm00001d036396'	'(at1g76050 : 305.0) Pseudouridine synthase family protein; FUNCTIONS IN: pseudouridine synthase activity; INVOLVED IN: pseudouridine synthesis, RNA modification; LOCATED IN: chloroplast; EXPRESSED IN: shoot, leaf lamina base, stem, embryo, leaf whorl; EXPRESSED DURING: D bilateral stage; CONTAINS InterPro DOMAIN/s: Pseudouridine synthase, RluC/RluD (InterPro:IPR006225), Pseudouridine synthase, c…	T
'29.2.1.1.1.1.83'	'protein.synthesis.ribosomal protein.prokaryotic.chloroplast.30S subunit.PSRP3'	'zm00001d003411'	'(o48609|rrp3_horvu : 188.0) Plastid-specific 30S ribosomal protein 3, chloroplast precursor (PSRP-3) - Hordeum vulgare (Barley) & (at1g68590 : 147.0) Ribosomal protein PSRP-3/Ycf65; FUNCTIONS IN: structural constituent of ribosome; INVOLVED IN: translation; LOCATED IN: chloroplast; EXPRESSED IN: 22 plant structures; EXPRESSED DURING: 13 growth stages; CONTAINS InterPro DOMAIN/s: Ribosomal protei…	T
'29.2.1.1.1.2.18'	'protein.synthesis.ribosomal protein.prokaryotic.chloroplast.50S subunit.L18'	'zm00001d034724'	'(q8say0|rk18_orysa : 225.0) 50S ribosomal protein L18, chloroplast precursor (CL18) - Oryza sativa (Rice) & (at1g48350 : 182.0) Ribosomal L18p/L5e family protein; FUNCTIONS IN: structural constituent of ribosome; INVOLVED IN: translation, ribosome biogenesis; LOCATED IN: ribosome, chloroplast, chloroplast envelope; EXPRESSED IN: 22 plant structures; EXPRESSED DURING: 13 growth stages; CONTAINS I…	T
'29.2.1.1.1.2.29'	'protein.synthesis.ribosomal protein.prokaryotic.chloroplast.50S subunit.L29'	'zm00001d018096'	'(q9swi6|rk29_maize : 218.0) 50S ribosomal protein L29, chloroplast precursor (CL29) - Zea mays (Maize) & (at5g65220 : 143.0) Ribosomal L29 family protein ; FUNCTIONS IN: structural constituent of ribosome; INVOLVED IN: translation, ribosome biogenesis; LOCATED IN: ribosome, chloroplast stroma, chloroplast, nucleoid, chloroplast envelope; EXPRESSED IN: 22 plant structures; EXPRESSED DURING: 13 gr…	T
'29.2.1.1.1.2.3'	'protein.synthesis.ribosomal protein.prokaryotic.chloroplast.50S subunit.L3'	'zm00001d015204'	'(o80360|rk3_tobac : 357.0) 50S ribosomal protein L3, chloroplast precursor (Fragment) - Nicotiana tabacum (Common tobacco) & (at2g43030 : 349.0) Ribosomal protein L3 family protein; FUNCTIONS IN: structural constituent of ribosome; INVOLVED IN: translation; LOCATED IN: ribosome, chloroplast stroma, chloroplast, membrane; EXPRESSED IN: 23 plant structures; EXPRESSED DURING: 13 growth stages; CONT…	T
'29.2.1.1.3.1.1'	'protein.synthesis.ribosomal protein.prokaryotic.unknown organellar.30S subunit.S1'	'zm00001d047581'	'(p29344|rr1_spiol : 484.0) 30S ribosomal protein S1, chloroplast precursor (CS1) - Spinacia oleracea (Spinach) & (at5g30510 : 469.0) ribosomal protein S1 (RPS1); FUNCTIONS IN: RNA binding; LOCATED IN: thylakoid, chloroplast stroma, chloroplast, membrane; EXPRESSED IN: 24 plant structures; EXPRESSED DURING: 14 growth stages; CONTAINS InterPro DOMAIN/s: Nucleic acid-binding, OB-fold-like (InterPro…	T
'29.2.1.2.1.10'	'protein.synthesis.ribosomal protein.eukaryotic.40S subunit.S10'	'novel00906'	'(q9ayp4|rs10_orysa : 119.0) 40S ribosomal protein S10 - Oryza sativa (Rice) & (at5g52650 : 105.0) RNA binding Plectin/S10 domain-containing protein; FUNCTIONS IN: structural constituent of ribosome; INVOLVED IN: translation; LOCATED IN: cytosolic small ribosomal subunit, cytosolic ribosome, cell wall, membrane; EXPRESSED IN: 22 plant structures; EXPRESSED DURING: 13 growth stages; CONTAINS Inter…	T
'29.2.1.2.1.31'	'protein.synthesis.ribosomal protein.eukaryotic.40S subunit.SA'	'zm00001d027919'	'(o80377|rssa_dauca : 337.0) 40S ribosomal protein SA (p40) - Daucus carota (Carrot) & (at1g72370 : 318.0) acidic protein associated to 40S ribosomal subunit of ribosomes. Involved in polysome formation during active protein synthesis. Expressed in actively growing tissue.; 40s ribosomal protein SA (P40); FUNCTIONS IN: structural constituent of ribosome; INVOLVED IN: response to salt stress, matu…	T
'29.2.1.2.1.4'	'protein.synthesis.ribosomal protein.eukaryotic.40S subunit.S4'	'zm00001d036129'	'(o22424|rs4_maize : 108.0) 40S ribosomal protein S4 - Zea mays (Maize) & (at5g58420 : 101.0) Ribosomal protein S4 (RPS4A) family protein; FUNCTIONS IN: structural constituent of ribosome; INVOLVED IN: translation; LOCATED IN: cytosolic small ribosomal subunit, cytosolic ribosome, nucleolus, membrane; EXPRESSED IN: 25 plant structures; EXPRESSED DURING: 13 growth stages; CONTAINS InterPro DOMAIN/…	T
'29.2.1.2.1.4'	'protein.synthesis.ribosomal protein.eukaryotic.40S subunit.S4'	'zm00001d005030'	'(o22424|rs4_maize : 107.0) 40S ribosomal protein S4 - Zea mays (Maize) & (at5g58420 : 100.0) Ribosomal protein S4 (RPS4A) family protein; FUNCTIONS IN: structural constituent of ribosome; INVOLVED IN: translation; LOCATED IN: cytosolic small ribosomal subunit, cytosolic ribosome, nucleolus, membrane; EXPRESSED IN: 25 plant structures; EXPRESSED DURING: 13 growth stages; CONTAINS InterPro DOMAIN/…	T
'29.2.1.2.2.40'	'protein.synthesis.ribosomal protein.eukaryotic.60S subunit.L40'	'novel00549'	'(at3g52590 : 178.0) Ubiquitin extension protein; ubiquitin extension protein 1 (UBQ1); FUNCTIONS IN: structural constituent of ribosome; INVOLVED IN: response to water deprivation, protein ubiquitination, embryo development ending in seed dormancy; LOCATED IN: ribosome, intracellular; EXPRESSED IN: 25 plant structures; EXPRESSED DURING: 14 growth stages; CONTAINS InterPro DOMAIN/s: Ribosomal pro…	T
'29.2.1.2.2.7'	'protein.synthesis.ribosomal protein.eukaryotic.60S subunit.L7'	'zm00001d030114'	'(at3g13580 : 342.0) Ribosomal protein L30/L7 family protein; FUNCTIONS IN: structural constituent of ribosome, transcription regulator activity; INVOLVED IN: translation; LOCATED IN: cytosolic ribosome, cytosolic large ribosomal subunit, large ribosomal subunit, membrane; EXPRESSED IN: 22 plant structures; EXPRESSED DURING: 13 growth stages; CONTAINS InterPro DOMAIN/s: Ribosomal protein L30, N-t…	T
'29.2.1.2.2.99'	'protein.synthesis.ribosomal protein.eukaryotic.60S subunit.unknown'	'zm00001d038975'	'(at3g58660 : 191.0) Ribosomal protein L1p/L10e family; FUNCTIONS IN: structural constituent of ribosome, RNA binding; INVOLVED IN: translation, RNA processing; LOCATED IN: nucleolus, membrane; EXPRESSED IN: 22 plant structures; EXPRESSED DURING: 13 growth stages; CONTAINS InterPro DOMAIN/s: Ribosomal protein L1 (InterPro:IPR002143), Ribosomal protein L1, 2-layer alpha/beta-sandwich (InterPro:IPR…	T
'29.2.2'	'protein.synthesis.ribosome biogenesis'	'zm00001d031949'	'(at3g53470 : 119.0) unknown protein; FUNCTIONS IN: molecular_function unknown; INVOLVED IN: biological_process unknown; LOCATED IN: chloroplast thylakoid membrane, chloroplast; EXPRESSED IN: 22 plant structures; EXPRESSED DURING: 13 growth stages; Has 35 Blast hits to 35 proteins in 13 species: Archae - 0; Bacteria - 0; Metazoa - 0; Fungi - 0; Plants - 35; Viruses - 0; Other Eukaryotes - 0 (sour…	T
'29.2.2.3.1'	'protein.synthesis.ribosome biogenesis.Pre-rRNA processing and modifications.snoRNPs'	'zm00001d052952'	'(at3g03920 : 184.0) H/ACA ribonucleoprotein complex, subunit Gar1/Naf1 protein; FUNCTIONS IN: snoRNA binding, pseudouridine synthase activity, RNA binding; LOCATED IN: chloroplast thylakoid membrane, nucleolus; EXPRESSED IN: 23 plant structures; EXPRESSED DURING: 13 growth stages; CONTAINS InterPro DOMAIN/s: H/ACA ribonucleoprotein complex, subunit Gar1, eukaryote (InterPro:IPR021154), H/ACA rib…	T
'29.2.2.3.1'	'protein.synthesis.ribosome biogenesis.Pre-rRNA processing and modifications.snoRNPs'	'zm00001d045759'	'(at3g12860 : 86.7) NOP56-like pre RNA processing ribonucleoprotein; CONTAINS InterPro DOMAIN/s: Pre-mRNA processing ribonucleoprotein, snoRNA-binding domain (InterPro:IPR002687), NOP5, N-terminal (InterPro:IPR012974), NOSIC (InterPro:IPR012976); BEST Arabidopsis thaliana protein match is: homolog of nucleolar protein NOP56 (TAIR:AT1G56110.1); Has 9295 Blast hits to 5418 proteins in 524 species: …	T
'29.2.2.3.4'	'protein.synthesis.ribosome biogenesis.Pre-rRNA processing and modifications.WD-repeat proteins'	'zm00001d002483'	'(at5g16750 : 458.0) Encodes a nucleolar localized WD-40 repeat protein that is preferentially expressed in dividing cells and is required for regulated division planes and embryo development.; TORMOZEMBRYO DEFECTIVE (TOZ); CONTAINS InterPro DOMAIN/s: WD40 repeat 2 (InterPro:IPR019782), WD40 repeat, conserved site (InterPro:IPR019775), WD40 repeat (InterPro:IPR001680), Small-subunit processome, U…	T
'29.2.3'	'protein.synthesis.initiation'	'zm00001d015917'	'(p47815|if1a_wheat : 231.0) Eukaryotic translation initiation factor 1A (EIF-1A) (EIF-4C) - Triticum aestivum (Wheat) & (at2g04520 : 225.0) Nucleic acid-binding, OB-fold-like protein; FUNCTIONS IN: RNA binding, translation initiation factor activity; INVOLVED IN: translational initiation; LOCATED IN: cellular_component unknown; EXPRESSED IN: 24 plant structures; EXPRESSED DURING: 15 growth stage…	T
'29.2.3'	'protein.synthesis.initiation'	'zm00001d014873'	'(at3g57290 : 280.0) Encodes a protein that is found in not only the eif3 complex but also in association with subunits of the COP9 signalosome. eIF3e appears to be subjected to proteasome-dependent degradation that requires the PCI domain of eIF3e. The level of eIF3e present in cells appears to affect the rate of translation.; eukaryotic translation initiation factor 3E (EIF3E); FUNCTIONS IN: pr…	T
'29.2.3'	'protein.synthesis.initiation'	'zm00001d014580'	'(at5g43810 : 126.0) Encodes a member of the EIF2C (elongation initiation factor 2c)/ Argonaute class of proteins. Required to establish the central-peripheral organization of the embryo apex. Along with WUS and CLV genes, controls the relative organization of central zone and peripheral zone cells in meristems. Acts in embryonic provascular tissue potentiating WUSCHEL function during meristem de…	T
'29.2.3'	'protein.synthesis.initiation'	'zm00001d013648'	'(p80639|if5a_maize : 178.0) Eukaryotic translation initiation factor 5A (eIF-5A) (eIF-4D) - Zea mays (Maize) & (at1g13950 : 158.0) Encodes eukaryotic translation initiation factor 5A (EIF-5A).In mammalian cells it functions as a shuttle protein that translocates mRNA from the nucleus to cytoplasmic ribosomes. Overexpression results in an increase in both primary and secondary xylem formation. In…	T
'29.2.3'	'protein.synthesis.initiation'	'novel01296'	'(at1g17220 : 987.0) Encodes a chloroplast localized protein with similarity to translation initiation factor 2. Can complement loss of INFB in E.coli suggesting FUG1 does function as a translation initiation factor in vivo. Identified as a suppressor of the leaf variegation mutant var2-6. Suppression is only seen in hypomorphs as complete loss of function alleles are embryo lethal.; fu-gaeri1 (F…	T
'29.2.4'	'protein.synthesis.elongation'	'zm00001d007092'	'(at4g29060 : 594.0) embryo defective 2726 (emb2726); FUNCTIONS IN: RNA binding, translation elongation factor activity; INVOLVED IN: translational elongation, response to cadmium ion, embryo development ending in seed dormancy; LOCATED IN: chloroplast; EXPRESSED IN: 24 plant structures; EXPRESSED DURING: 14 growth stages; CONTAINS InterPro DOMAIN/s: Nucleic acid-binding, OB-fold (InterPro:IPR012…	T
'29.2.4'	'protein.synthesis.elongation'	'zm00001d006596'	'(o64937|ef1a_orysa : 858.0) Elongation factor 1-alpha (EF-1-alpha) - Oryza sativa (Rice) & (at5g60390 : 848.0) GTP binding Elongation factor Tu family protein; FUNCTIONS IN: calmodulin binding, translation elongation factor activity; INVOLVED IN: translational elongation; LOCATED IN: mitochondrion, nucleus, cytoplasm; EXPRESSED IN: cotyledon, male gametophyte, guard cell, pollen tube, seed; EXPR…	T
'29.2.5'	'protein.synthesis.release'	'zm00001d037868'	'(at3g26618 : 702.0) eukaryotic release factor 1-3 (ERF1-3); FUNCTIONS IN: translation release factor activity; INVOLVED IN: translational termination; LOCATED IN: cytoplasm; EXPRESSED IN: male gametophyte, leaf, pollen tube; EXPRESSED DURING: M germinated pollen stage; CONTAINS InterPro DOMAIN/s: eRF1 domain 2 (InterPro:IPR005141), eRF1 domain 3 (InterPro:IPR005142), eRF1 domain 1 (InterPro:IPR0…	T
'29.3.1'	'protein.targeting.nucleus'	'zm00001d043234'	'(at1g27970 : 147.0) Encodes an ortholog of yeast NTF2, a nuclear envelop transport protein that functions as the nuclear import receptor for RanGDP, an essential player in nucleocytoplasmic transport.; nuclear transport factor 2B (NTF2B); FUNCTIONS IN: protein transporter activity, Ran GTPase binding; INVOLVED IN: nucleocytoplasmic transport, protein import into nucleus; LOCATED IN: nuclear enve…	T
'29.3.1'	'protein.targeting.nucleus'	'zm00001d034309'	'(at1g80680 : 120.0) Mutant has early-flowering phenotype, encodes a putative nucleoporin. Required for the activation of downstream defense pathways by the snc1 mutation. Involved in basal resistance against bacterial pathogens.; SUPPRESSOR OF AUXIN RESISTANCE 3 (SAR3); FUNCTIONS IN: porin activity; INVOLVED IN: mRNA export from nucleus, defense response signaling pathway, resistance gene-depend…	T
'29.3.1'	'protein.targeting.nucleus'	'zm00001d008702'	'(at1g80680 : 147.0) Mutant has early-flowering phenotype, encodes a putative nucleoporin. Required for the activation of downstream defense pathways by the snc1 mutation. Involved in basal resistance against bacterial pathogens.; SUPPRESSOR OF AUXIN RESISTANCE 3 (SAR3); FUNCTIONS IN: porin activity; INVOLVED IN: mRNA export from nucleus, defense response signaling pathway, resistance gene-depend…	T
'29.3.1'	'protein.targeting.nucleus'	'zm00001d008345'	'(q71vm4|ima1a_orysa : 894.0) Importin alpha-1a subunit - Oryza sativa (Rice) & (at4g16143 : 809.0) Protein interacts with Agrobacterium proteins VirD2 and VirE2. Is not individually essential for Agrobacterium-mediated root transformation, but when overexpressed can rescue the impa-4 decreased transformation susceptibility phenotype.; importin alpha isoform 2 (IMPA-2); FUNCTIONS IN: protein tran…	T
'29.3.3'	'protein.targeting.chloroplast'	'zm00001d042044'	'(at2g45770 : 465.0) chloroplast SRP receptor homolog, alpha subunit CPFTSY. Required for LHCP integration into isolated thylakoids.; CPFTSY; FUNCTIONS IN: GTP binding; INVOLVED IN: protein import into chloroplast thylakoid membrane, protein targeting, thylakoid membrane organization, photosynthetic electron transport in photosystem II; LOCATED IN: chloroplast, signal recognition particle, endopl…	T
'29.3.3'	'protein.targeting.chloroplast'	'zm00001d017208'	'(at1g04940 : 179.0) Tic20 is believed to function as a component of the protein-conducting channel at the inner envelope membrane. Genes AT1G04940 and AT1G04945 were switched for the TAIR7 genome release to give consistency with MIPs annotation.; translocon at the inner envelope membrane of chloroplasts 20 (TIC20); CONTAINS InterPro DOMAIN/s: Uncharacterised conserved protein ycf60 (InterPro:IPR…	T
'29.3.3'	'protein.targeting.chloroplast'	'zm00001d003913'	'(at5g52440 : 149.0) HCF106; nuclear gene for chloroplast. Thylakoid membrane delta pH translocation pathway component protein; related to Escherichia coli TatA and TatB; HIGH CHLOROPHYLL FLUORESCENCE 106 (HCF106); FUNCTIONS IN: proton motive force dependent protein transmembrane transporter activity; INVOLVED IN: protein import into chloroplast thylakoid membrane; LOCATED IN: thylakoid, chloropl…	T
'29.3.4.3'	'protein.targeting.secretory pathway.vacuole'	'zm00001d050161'	'(at5g04920 : 100.0) EAP30/Vps36 family protein; CONTAINS InterPro DOMAIN/s: EAP30 (InterPro:IPR007286), Vacuolar protein sorting protein, Vps36 (InterPro:IPR021648); Has 1807 Blast hits to 1807 proteins in 277 species: Archae - 0; Bacteria - 0; Metazoa - 736; Fungi - 347; Plants - 385; Viruses - 0; Other Eukaryotes - 339 (source: NCBI BLink). & (reliability: 200.0) & (original description: no or…	T
'29.3.4.99'	'protein.targeting.secretory pathway.unspecified'	'zm00001d051850'	'(at1g52600 : 226.0) Peptidase S24/S26A/S26B/S26C family protein; FUNCTIONS IN: peptidase activity; INVOLVED IN: proteolysis, signal peptide processing; LOCATED IN: endoplasmic reticulum, plasma membrane, membrane; EXPRESSED IN: 26 plant structures; EXPRESSED DURING: 14 growth stages; CONTAINS InterPro DOMAIN/s: Peptidase S24/S26A/S26B, conserved region (InterPro:IPR019759), Peptidase S26B, eukar…	T
'29.3.4.99'	'protein.targeting.secretory pathway.unspecified'	'zm00001d026521'	'(at1g53530 : 171.0) Peptidase S24/S26A/S26B/S26C family protein; FUNCTIONS IN: serine-type peptidase activity, peptidase activity; INVOLVED IN: proteolysis; LOCATED IN: integral to membrane, membrane; EXPRESSED IN: 22 plant structures; EXPRESSED DURING: 13 growth stages; CONTAINS InterPro DOMAIN/s: Peptidase S24/S26A/S26B/S26C, beta-ribbon domain (InterPro:IPR011056), Peptidase S24/S26A/S26B, co…	T
'29.3.4.99'	'protein.targeting.secretory pathway.unspecified'	'zm00001d023840'	'(at4g20410 : 291.0) Encodes a member of the gamma-soluble NSF attachment protein (gSNAP) gene family.; gamma-soluble NSF attachment protein (GSNAP); FUNCTIONS IN: transporter activity, binding; INVOLVED IN: intracellular protein transport; LOCATED IN: Golgi apparatus, endoplasmic reticulum, plasma membrane; EXPRESSED IN: 24 plant structures; EXPRESSED DURING: 15 growth stages; CONTAINS InterPro …	T
'29.3.4.99'	'protein.targeting.secretory pathway.unspecified'	'zm00001d010499'	'(at4g08690 : 208.0) Sec14p-like phosphatidylinositol transfer family protein; CONTAINS InterPro DOMAIN/s: Cellular retinaldehyde-binding/triple function, C-terminal (InterPro:IPR001251), Cellular retinaldehyde-binding/triple function, N-terminal (InterPro:IPR008273), Phosphatidylinositol transfer protein-like, N-terminal (InterPro:IPR011074); BEST Arabidopsis thaliana protein match is: Sec14p-li…	T
'29.3.4.99'	'protein.targeting.secretory pathway.unspecified'	'zm00001d002458'	'(at4g20410 : 225.0) Encodes a member of the gamma-soluble NSF attachment protein (gSNAP) gene family.; gamma-soluble NSF attachment protein (GSNAP); FUNCTIONS IN: transporter activity, binding; INVOLVED IN: intracellular protein transport; LOCATED IN: Golgi apparatus, endoplasmic reticulum, plasma membrane; EXPRESSED IN: 24 plant structures; EXPRESSED DURING: 15 growth stages; CONTAINS InterPro …	T
'29.4'	'protein.postranslational modification'	'zm00001d049966'	'(at3g48330 : 137.0) encodes protein-L-isoaspartate methyltransferase. Important for maintaining viability as the seed ages. Involved in germination.; protein-l-isoaspartate methyltransferase 1 (PIMT1); FUNCTIONS IN: protein-L-isoaspartate (D-aspartate) O-methyltransferase activity; INVOLVED IN: protein modification process, response to salt stress, aging, response to abscisic acid stimulus, seed…	T
'29.4'	'protein.postranslational modification'	'zm00001d048990'	'(at2g30020 : 213.0) Encodes AP2C1. Belongs to the clade B of the PP2C-superfamily. Acts as a MAPK phosphatase that negatively regulates MPK4 and MPK6.; Protein phosphatase 2C family protein; CONTAINS InterPro DOMAIN/s: Protein phosphatase 2C, manganese/magnesium aspartate binding site (InterPro:IPR000222), Protein phosphatase 2C-related (InterPro:IPR001932), Protein phosphatase 2C (InterPro:IPR0…	T
'29.4'	'protein.postranslational modification'	'zm00001d042293'	'(at3g53380 : 242.0) Concanavalin A-like lectin protein kinase family protein; FUNCTIONS IN: carbohydrate binding, kinase activity; INVOLVED IN: protein amino acid phosphorylation; LOCATED IN: plasma membrane; EXPRESSED IN: 11 plant structures; EXPRESSED DURING: 6 growth stages; CONTAINS InterPro DOMAIN/s: Legume lectin, beta chain (InterPro:IPR001220), Protein kinase, ATP binding site (InterPro:…	T
'29.4'	'protein.postranslational modification'	'zm00001d034555'	'(at3g07040 : 139.0) Contains an N-terminal tripartite nucleotide binding site and a C-terminal tandem array of leucine-rich repeats. Confers resistance to Pseudomonas syringae strains that carry the avirulence genes avrB and avrRpm1.; RESISTANCE TO P. SYRINGAE PV MACULICOLA 1 (RPM1); FUNCTIONS IN: protein binding, nucleotide binding; INVOLVED IN: defense response, plant-type hypersensitive respo…	T
'29.4'	'protein.postranslational modification'	'zm00001d026677'	'(at4g35780 : 235.0) ACT-like protein tyrosine kinase family protein; FUNCTIONS IN: protein serine/threonine/tyrosine kinase activity, protein kinase activity; INVOLVED IN: protein amino acid phosphorylation, metabolic process; EXPRESSED IN: 23 plant structures; EXPRESSED DURING: 13 growth stages; CONTAINS InterPro DOMAIN/s: Protein kinase, catalytic domain (InterPro:IPR000719), Amino acid-bindin…	T
'29.4'	'protein.postranslational modification'	'zm00001d026489'	'(at4g32300 : 261.0) S-domain-2 5 (SD2-5); FUNCTIONS IN: carbohydrate binding, protein kinase activity, kinase activity; INVOLVED IN: protein amino acid autophosphorylation; LOCATED IN: plasma membrane; EXPRESSED IN: 25 plant structures; EXPRESSED DURING: 15 growth stages; CONTAINS InterPro DOMAIN/s: Curculin-like (mannose-binding) lectin (InterPro:IPR001480), Protein kinase, ATP binding site (In…	T
'29.4'	'protein.postranslational modification'	'zm00001d021684'	'(at1g11330 : 380.0) S-locus lectin protein kinase family protein; FUNCTIONS IN: in 6 functions; INVOLVED IN: protein amino acid phosphorylation, recognition of pollen; LOCATED IN: plasma membrane; EXPRESSED IN: 21 plant structures; EXPRESSED DURING: 13 growth stages; CONTAINS InterPro DOMAIN/s: Curculin-like (mannose-binding) lectin (InterPro:IPR001480), Apple-like (InterPro:IPR003609), PAN-2 do…	T
'29.4'	'protein.postranslational modification'	'zm00001d015032'	'(at4g38470 : 665.0) ACT-like protein tyrosine kinase family protein; FUNCTIONS IN: protein serine/threonine/tyrosine kinase activity, protein kinase activity; INVOLVED IN: protein amino acid phosphorylation, metabolic process; LOCATED IN: cytosol; EXPRESSED IN: 25 plant structures; EXPRESSED DURING: 15 growth stages; CONTAINS InterPro DOMAIN/s: Serine/threonine-protein kinase domain (InterPro:IP…	T
'29.4'	'protein.postranslational modification'	'zm00001d013606'	'(at1g72710 : 159.0) Encodes a member of the casein kinase 1 protein family that is localized to the cytoplasm and nucleus.; casein kinase 1-like protein 2 (CKL2); FUNCTIONS IN: protein serine/threonine kinase activity, protein kinase activity, kinase activity, ATP binding; INVOLVED IN: protein amino acid phosphorylation; LOCATED IN: nucleus, plasma membrane, cytoplasm; EXPRESSED IN: 24 plant str…	T
'29.4'	'protein.postranslational modification'	'zm00001d013503'	'(at3g62260 : 83.2) Protein phosphatase 2C family protein; FUNCTIONS IN: protein serine/threonine phosphatase activity, catalytic activity; INVOLVED IN: protein amino acid dephosphorylation; LOCATED IN: protein serine/threonine phosphatase complex; EXPRESSED IN: 22 plant structures; EXPRESSED DURING: 12 growth stages; CONTAINS InterPro DOMAIN/s: Protein phosphatase 2C, manganese/magnesium asparta…	T
'29.4'	'protein.postranslational modification'	'zm00001d009261'	'(at1g61850 : 87.8) Encodes a non-specific lipase that hydrolyzes phospholipids as well as galactolipids, at both sn-1 and sn-2 positions. Involved in basal jasmonic acid biosynthesis by releasing the precursor fatty acid from membrane lipids. Mutant plants were impacted in resistance to fungus B. cinerea.; phospholipases;galactolipases; CONTAINS InterPro DOMAIN/s: Acyl transferase/acyl hydrolase…	T
'29.4'	'protein.postranslational modification'	'zm00001d008623'	'(at5g10480 : 226.0) Protein tyrosine phosphatase-like involved in cell division and differentiation. Interacts with CDKA;1 only in its phosphorylated form, preventing dephosphorylation. Overexpression slowed down cell division in suspension cell cultures at the G2-to-M transition and early mitosis and inhibited Arabidopsis seedling growth. Localized in the cytoplasm of dividing cells but moved i…	T
'29.4.1.54'	'protein.postranslational modification.kinase.receptor like cytoplasmatic kinase IV'	'zm00001d012929'	'(at4g00330 : 175.0) high overall homology to CRCK1; calmodulin-binding receptor-like cytoplasmic kinase 2 (CRCK2); FUNCTIONS IN: protein serine/threonine kinase activity, protein kinase activity, kinase activity, ATP binding; INVOLVED IN: pollen development; EXPRESSED IN: 22 plant structures; EXPRESSED DURING: 13 growth stages; CONTAINS InterPro DOMAIN/s: Protein kinase, ATP binding site (InterP…	T
'29.4.1.57'	'protein.postranslational modification.kinase.receptor like cytoplasmatic kinase VII'	'zm00001d051424'	'(at2g17220 : 415.0) Protein kinase superfamily protein; FUNCTIONS IN: protein serine/threonine kinase activity, protein kinase activity, kinase activity, ATP binding; INVOLVED IN: protein amino acid phosphorylation; LOCATED IN: chloroplast; EXPRESSED IN: 22 plant structures; EXPRESSED DURING: 13 growth stages; CONTAINS InterPro DOMAIN/s: Protein kinase, ATP binding site (InterPro:IPR017441), Ser…	T
'29.4.1.57'	'protein.postranslational modification.kinase.receptor like cytoplasmatic kinase VII'	'zm00001d051323'	'(at5g47070 : 321.0) Protein kinase superfamily protein; FUNCTIONS IN: protein serine/threonine kinase activity, protein kinase activity, kinase activity, ATP binding; INVOLVED IN: protein amino acid phosphorylation; LOCATED IN: plasma membrane; EXPRESSED IN: 22 plant structures; EXPRESSED DURING: 13 growth stages; CONTAINS InterPro DOMAIN/s: Protein kinase, ATP binding site (InterPro:IPR017441),…	T
'29.4.1.57'	'protein.postranslational modification.kinase.receptor like cytoplasmatic kinase VII'	'zm00001d032069'	'(at2g05940 : 422.0) Protein kinase superfamily protein; FUNCTIONS IN: protein serine/threonine kinase activity, protein kinase activity, kinase activity, ATP binding; INVOLVED IN: protein amino acid phosphorylation; LOCATED IN: cellular_component unknown; EXPRESSED IN: 22 plant structures; EXPRESSED DURING: 13 growth stages; CONTAINS InterPro DOMAIN/s: Protein kinase, catalytic domain (InterPro:…	T
'29.4.1.57'	'protein.postranslational modification.kinase.receptor like cytoplasmatic kinase VII'	'zm00001d032016'	'(at3g09830 : 103.0) Protein kinase superfamily protein; FUNCTIONS IN: protein kinase activity, kinase activity, ATP binding; INVOLVED IN: protein amino acid phosphorylation; LOCATED IN: plasma membrane; EXPRESSED IN: 23 plant structures; EXPRESSED DURING: 13 growth stages; CONTAINS InterPro DOMAIN/s: Protein kinase, ATP binding site (InterPro:IPR017441), Protein kinase, catalytic domain (InterPr…	T
'29.4.1.57'	'protein.postranslational modification.kinase.receptor like cytoplasmatic kinase VII'	'zm00001d028613'	'(at2g28930 : 469.0) protein kinase 1B (PK1B); FUNCTIONS IN: protein serine/threonine kinase activity, protein kinase activity, kinase activity, ATP binding; INVOLVED IN: protein amino acid phosphorylation; LOCATED IN: plasma membrane; EXPRESSED IN: 22 plant structures; EXPRESSED DURING: 13 growth stages; CONTAINS InterPro DOMAIN/s: Protein kinase, ATP binding site (InterPro:IPR017441), Protein k…	T
'29.4.1.58'	'protein.postranslational modification.kinase.receptor like cytoplasmatic kinase VIII'	'zm00001d003212'	'(at3g59350 : 343.0) Protein kinase superfamily protein; FUNCTIONS IN: protein tyrosine kinase activity, protein kinase activity, kinase activity, ATP binding; INVOLVED IN: protein amino acid phosphorylation; LOCATED IN: plasma membrane; EXPRESSED IN: 24 plant structures; EXPRESSED DURING: 15 growth stages; CONTAINS InterPro DOMAIN/s: Protein kinase, ATP binding site (InterPro:IPR017441), Protein…	T
'29.4.1.59'	'protein.postranslational modification.kinase.receptor like cytoplasmatic kinase IX'	'zm00001d053876'	'(at2g24370 : 360.0) Protein kinase protein with adenine nucleotide alpha hydrolases-like domain; FUNCTIONS IN: protein serine/threonine kinase activity, protein kinase activity, kinase activity, ATP binding; INVOLVED IN: protein amino acid phosphorylation, response to stress; LOCATED IN: cellular_component unknown; EXPRESSED IN: 6 plant structures; EXPRESSED DURING: L mature pollen stage, M germ…	T
'29.5'	'protein.degradation'	'zm00001d039682'	'(at1g70550 : 495.0) Protein of Unknown Function (DUF239); INVOLVED IN: biological_process unknown; LOCATED IN: endomembrane system; EXPRESSED IN: 21 plant structures; EXPRESSED DURING: 10 growth stages; CONTAINS InterPro DOMAIN/s: Protein of unknown function DUF239, plant (InterPro:IPR004314); BEST Arabidopsis thaliana protein match is: Protein of Unknown Function (DUF239) (TAIR:AT1G23340.2); Ha…	T
'29.5'	'protein.degradation'	'zm00001d029387'	'(at1g02170 : 305.0) Metacaspase AtMCP1b. Arginine/lysine-specific cysteine protease activity. Induces apoptosis in yeast. Contains Pfam profile PF00656: ICE-like protease (caspase) p20 domain; metacaspase 1 (AMC1); FUNCTIONS IN: cysteine-type endopeptidase activity; INVOLVED IN: proteolysis, induction of apoptosis; LOCATED IN: chloroplast; EXPRESSED IN: 23 plant structures; EXPRESSED DURING: 15 …	T
'29.5'	'protein.degradation'	'zm00001d002678'	'(at1g76140 : 939.0) Prolyl oligopeptidase family protein; FUNCTIONS IN: serine-type peptidase activity, serine-type endopeptidase activity; INVOLVED IN: proteolysis; LOCATED IN: chloroplast; EXPRESSED IN: 24 plant structures; EXPRESSED DURING: 15 growth stages; CONTAINS InterPro DOMAIN/s: Peptidase S9, prolyl oligopeptidase, catalytic domain (InterPro:IPR001375), Peptidase S9A, oligopeptidase, N…	T
'29.5'	'protein.degradation'	'zm00001d002263'	'(at1g63770 : 272.0) Peptidase M1 family protein; FUNCTIONS IN: metallopeptidase activity, zinc ion binding; INVOLVED IN: proteolysis; EXPRESSED IN: 24 plant structures; EXPRESSED DURING: 15 growth stages; CONTAINS InterPro DOMAIN/s: Peptidase M1, membrane alanine aminopeptidase (InterPro:IPR001930), Peptidase M1, membrane alanine aminopeptidase, N-terminal (InterPro:IPR014782), Peptidase M1, ala…	T
'29.5.1'	'protein.degradation.subtilases'	'zm00001d021283'	'(at4g10550 : 616.0) Subtilase family protein; FUNCTIONS IN: identical protein binding, serine-type endopeptidase activity; INVOLVED IN: proteolysis, negative regulation of catalytic activity; EXPRESSED IN: 8 plant structures; EXPRESSED DURING: F mature embryo stage, petal differentiation and expansion stage, E expanded cotyledon stage, D bilateral stage; CONTAINS InterPro DOMAIN/s: Protease-asso…	T
'29.5.11'	'protein.degradation.ubiquitin'	'zm00001d049805'	'(at1g04850 : 259.0) ubiquitin-associated (UBA)/TS-N domain-containing protein; FUNCTIONS IN: zinc ion binding; INVOLVED IN: biological_process unknown; LOCATED IN: intracellular; EXPRESSED IN: 24 plant structures; EXPRESSED DURING: 13 growth stages; CONTAINS InterPro DOMAIN/s: Zinc finger, C2H2-like (InterPro:IPR015880), Ubiquitin-associated/translation elongation factor EF1B, N-terminal (InterP…	T
'29.5.11'	'protein.degradation.ubiquitin'	'zm00001d016552'	'(at1g04850 : 220.0) ubiquitin-associated (UBA)/TS-N domain-containing protein; FUNCTIONS IN: zinc ion binding; INVOLVED IN: biological_process unknown; LOCATED IN: intracellular; EXPRESSED IN: 24 plant structures; EXPRESSED DURING: 13 growth stages; CONTAINS InterPro DOMAIN/s: Zinc finger, C2H2-like (InterPro:IPR015880), Ubiquitin-associated/translation elongation factor EF1B, N-terminal (InterP…	T
'29.5.11'	'protein.degradation.ubiquitin'	'zm00001d015028'	'(at2g16920 : 166.0) ubiquitin-conjugating enzyme 23 (UBC23); FUNCTIONS IN: ubiquitin-protein ligase activity, small conjugating protein ligase activity; INVOLVED IN: regulation of protein metabolic process, post-translational protein modification; LOCATED IN: cellular_component unknown; EXPRESSED IN: 24 plant structures; EXPRESSED DURING: 15 growth stages; CONTAINS InterPro DOMAIN/s: Ubiquitin-c…	T
'29.5.11'	'protein.degradation.ubiquitin'	'novel00549'	'(at3g52590 : 178.0) Ubiquitin extension protein; ubiquitin extension protein 1 (UBQ1); FUNCTIONS IN: structural constituent of ribosome; INVOLVED IN: response to water deprivation, protein ubiquitination, embryo development ending in seed dormancy; LOCATED IN: ribosome, intracellular; EXPRESSED IN: 25 plant structures; EXPRESSED DURING: 14 growth stages; CONTAINS InterPro DOMAIN/s: Ribosomal pro…	T
'29.5.11.3'	'protein.degradation.ubiquitin.E2'	'zm00001d053897'	'(at1g64230 : 261.0) ubiquitin-conjugating enzyme 28 (UBC28); CONTAINS InterPro DOMAIN/s: Ubiquitin-conjugating enzyme/RWD-like (InterPro:IPR016135), Ubiquitin-conjugating enzyme, E2 (InterPro:IPR000608); BEST Arabidopsis thaliana protein match is: ubiquitin conjugating enzyme 8 (TAIR:AT5G41700.5). & (p35130|ubc2_medsa : 124.0) Ubiquitin-conjugating enzyme E2-17 kDa (EC 6.3.2.19) (Ubiquitin-prote…	T
'29.5.11.3'	'protein.degradation.ubiquitin.E2'	'zm00001d015028'	'(at2g16920 : 166.0) ubiquitin-conjugating enzyme 23 (UBC23); FUNCTIONS IN: ubiquitin-protein ligase activity, small conjugating protein ligase activity; INVOLVED IN: regulation of protein metabolic process, post-translational protein modification; LOCATED IN: cellular_component unknown; EXPRESSED IN: 24 plant structures; EXPRESSED DURING: 15 growth stages; CONTAINS InterPro DOMAIN/s: Ubiquitin-c…	T
'29.5.11.4.2'	'protein.degradation.ubiquitin.E3.RING'	'zm00001d051501'	'(at1g76410 : 117.0) ATL8; FUNCTIONS IN: zinc ion binding; EXPRESSED IN: 22 plant structures; EXPRESSED DURING: 13 growth stages; CONTAINS InterPro DOMAIN/s: Zinc finger, RING-type (InterPro:IPR001841), Zinc finger, C3HC4 RING-type (InterPro:IPR018957); BEST Arabidopsis thaliana protein match is: RING/U-box superfamily protein (TAIR:AT1G20823.1); Has 9001 Blast hits to 8977 proteins in 267 specie…	T
'29.5.11.4.2'	'protein.degradation.ubiquitin.E3.RING'	'zm00001d045051'	'(at1g53820 : 119.0) RING/U-box superfamily protein; FUNCTIONS IN: zinc ion binding; CONTAINS InterPro DOMAIN/s: Zinc finger, RING-type (InterPro:IPR001841), Zinc finger, C3HC4 RING-type (InterPro:IPR018957); BEST Arabidopsis thaliana protein match is: RING/U-box superfamily protein (TAIR:AT1G72310.1); Has 9301 Blast hits to 9282 proteins in 297 species: Archae - 0; Bacteria - 0; Metazoa - 2391; …	T
'29.5.11.4.2'	'protein.degradation.ubiquitin.E3.RING'	'zm00001d043613'	'(at5g25560 : 404.0) CHY-type/CTCHY-type/RING-type Zinc finger protein; FUNCTIONS IN: zinc ion binding; EXPRESSED IN: 24 plant structures; EXPRESSED DURING: 15 growth stages; CONTAINS InterPro DOMAIN/s: Zinc finger, CTCHY-type (InterPro:IPR017921), Zinc finger, CHY-type (InterPro:IPR008913), Zinc finger, RING-type (InterPro:IPR001841), Zinc finger, C3HC4 RING-type (InterPro:IPR018957); BEST Arabi…	T
'29.5.11.4.2'	'protein.degradation.ubiquitin.E3.RING'	'zm00001d039377'	'(at1g72200 : 83.2) RING/U-box superfamily protein; FUNCTIONS IN: zinc ion binding; EXPRESSED IN: 13 plant structures; EXPRESSED DURING: LP.04 four leaves visible, 4 anthesis, petal differentiation and expansion stage, LP.08 eight leaves visible; CONTAINS InterPro DOMAIN/s: Zinc finger, RING-type (InterPro:IPR001841), Zinc finger, C3HC4 RING-type (InterPro:IPR018957); BEST Arabidopsis thaliana pr…	T
'29.5.11.4.2'	'protein.degradation.ubiquitin.E3.RING'	'zm00001d035428'	'(at1g08050 : 120.0) Zinc finger (C3HC4-type RING finger) family protein; FUNCTIONS IN: ubiquitin-protein ligase activity, zinc ion binding; LOCATED IN: plasma membrane; EXPRESSED IN: 12 plant structures; EXPRESSED DURING: 4 anthesis, LP.10 ten leaves visible, petal differentiation and expansion stage, LP.08 eight leaves visible; CONTAINS InterPro DOMAIN/s: Zinc finger, RING-type (InterPro:IPR001…	T
'29.5.11.4.2'	'protein.degradation.ubiquitin.E3.RING'	'zm00001d029847'	'(at3g61390 : 171.0) RING/U-box superfamily protein; FUNCTIONS IN: ubiquitin-protein ligase activity; INVOLVED IN: protein ubiquitination; LOCATED IN: ubiquitin ligase complex; EXPRESSED IN: 17 plant structures; EXPRESSED DURING: 11 growth stages; CONTAINS InterPro DOMAIN/s: U box domain (InterPro:IPR003613); BEST Arabidopsis thaliana protein match is: U-box domain-containing protein (TAIR:AT2G45…	T
'29.5.11.4.2'	'protein.degradation.ubiquitin.E3.RING'	'zm00001d029806'	'(at2g17730 : 206.0) Intrinsic thylakoid membrane protein that fixes RPOTmp on the stromal side of the thylakoid membrane.; NEP-interacting protein 2 (NIP2); CONTAINS InterPro DOMAIN/s: Zinc finger, RING-type (InterPro:IPR001841); BEST Arabidopsis thaliana protein match is: RING/U-box superfamily protein (TAIR:AT4G35840.1). & (reliability: 412.0) & (original description: no original description)'	T
'29.5.11.4.2'	'protein.degradation.ubiquitin.E3.RING'	'zm00001d024713'	'(at5g60170 : 131.0) RNA binding (RRM/RBD/RNP motifs) family protein; FUNCTIONS IN: RNA binding, nucleotide binding, zinc ion binding, nucleic acid binding; INVOLVED IN: biological_process unknown; LOCATED IN: cellular_component unknown; EXPRESSED IN: 24 plant structures; EXPRESSED DURING: 15 growth stages; CONTAINS InterPro DOMAIN/s: Zinc finger, RING-type (InterPro:IPR001841), RNA recognition m…	T
'29.5.11.4.2'	'protein.degradation.ubiquitin.E3.RING'	'zm00001d024672'	'(at4g21350 : 165.0) Encodes a U-box/ARM repeat protein required fore self-incompatibility.; plant U-box 8 (PUB8); FUNCTIONS IN: ubiquitin-protein ligase activity, binding, zinc ion binding; INVOLVED IN: protein ubiquitination; LOCATED IN: ubiquitin ligase complex; EXPRESSED IN: 23 plant structures; EXPRESSED DURING: 13 growth stages; CONTAINS InterPro DOMAIN/s: Zinc finger, RING-type (InterPro:I…	T
'29.5.11.4.2'	'protein.degradation.ubiquitin.E3.RING'	'zm00001d024560'	'(at3g47160 : 167.0) RING/U-box superfamily protein; FUNCTIONS IN: zinc ion binding; EXPRESSED IN: 23 plant structures; EXPRESSED DURING: 13 growth stages; CONTAINS InterPro DOMAIN/s: Zinc finger, RING-type, conserved site (InterPro:IPR017907), Zinc finger, RING-type (InterPro:IPR001841); BEST Arabidopsis thaliana protein match is: RING/U-box superfamily protein (TAIR:AT5G58787.1). & (reliability…	T
'29.5.11.4.2'	'protein.degradation.ubiquitin.E3.RING'	'zm00001d018190'	'(at2g40830 : 145.0) Encodes a putative RING-H2 finger protein RHC1a.; RING-H2 finger C1A (RHC1A); FUNCTIONS IN: zinc ion binding; LOCATED IN: cell wall; EXPRESSED IN: 22 plant structures; EXPRESSED DURING: 13 growth stages; CONTAINS InterPro DOMAIN/s: Zinc finger, RING-type (InterPro:IPR001841), Zinc finger, C3HC4 RING-type (InterPro:IPR018957); BEST Arabidopsis thaliana protein match is: RING/U…	T
'29.5.11.4.2'	'protein.degradation.ubiquitin.E3.RING'	'zm00001d017653'	'(at3g60220 : 94.7) Encodes a putative RING-H2 zinc finger protein ATL4 (ATL4).; TOXICOS EN LEVADURA 4 (ATL4); FUNCTIONS IN: zinc ion binding; EXPRESSED IN: 18 plant structures; EXPRESSED DURING: 11 growth stages; CONTAINS InterPro DOMAIN/s: Zinc finger, RING-type (InterPro:IPR001841), Zinc finger, C3HC4 RING-type (InterPro:IPR018957); BEST Arabidopsis thaliana protein match is: RING/U-box superf…	T
'29.5.11.4.2'	'protein.degradation.ubiquitin.E3.RING'	'zm00001d009106'	'(q9lrb7|el5_orysa : 91.3) E3 ubiquitin-protein ligase EL5 (EC 6.3.2.-) - Oryza sativa (Rice) & (at2g42350 : 84.7) RING/U-box superfamily protein; FUNCTIONS IN: zinc ion binding; EXPRESSED IN: stem, root, stamen; EXPRESSED DURING: 4 anthesis; CONTAINS InterPro DOMAIN/s: Zinc finger, RING-type (InterPro:IPR001841), Zinc finger, C3HC4 RING-type (InterPro:IPR018957); BEST Arabidopsis thaliana protei…	T
'29.5.11.4.2'	'protein.degradation.ubiquitin.E3.RING'	'novel00894'	'(at5g01960 : 232.0) RING/U-box superfamily protein; FUNCTIONS IN: zinc ion binding; LOCATED IN: chloroplast; EXPRESSED IN: 23 plant structures; EXPRESSED DURING: 14 growth stages; CONTAINS InterPro DOMAIN/s: Zinc finger, RING-type, conserved site (InterPro:IPR017907), Zinc finger, RING-type (InterPro:IPR001841), Zinc finger, C3HC4 RING-type (InterPro:IPR018957); BEST Arabidopsis thaliana protein…	T
'29.5.11.4.3.2'	'protein.degradation.ubiquitin.E3.SCF.FBOX'	'zm00001d038537'	'(at4g18380 : 337.0) F-box family protein; FUNCTIONS IN: molecular_function unknown; INVOLVED IN: biological_process unknown; LOCATED IN: cellular_component unknown; CONTAINS InterPro DOMAIN/s: F-box domain, cyclin-like (InterPro:IPR001810), F-box domain, Skp2-like (InterPro:IPR022364); BEST Arabidopsis thaliana protein match is: F-box family protein (TAIR:AT5G46170.1). & (reliability: 674.0) & (…	T
'29.5.11.4.5.2'	'protein.degradation.ubiquitin.E3.BTB/POZ Cullin3.BTB/POZ'	'zm00001d036643'	'(at3g06190 : 120.0) BTB-POZ and MATH domain 2 (BPM2); CONTAINS InterPro DOMAIN/s: TRAF-like (InterPro:IPR008974), MATH (InterPro:IPR002083), BTB/POZ fold (InterPro:IPR011333), BTB/POZ (InterPro:IPR013069), Kelch related (InterPro:IPR013089), BTB/POZ-like (InterPro:IPR000210), TRAF-type (InterPro:IPR013322); BEST Arabidopsis thaliana protein match is: BTB-POZ and MATH domain 1 (TAIR:AT5G19000.1);…	T
'29.5.11.4.5.2'	'protein.degradation.ubiquitin.E3.BTB/POZ Cullin3.BTB/POZ'	'zm00001d026505'	'(at3g03740 : 87.8) BTB-POZ and MATH domain 4 (BPM4); CONTAINS InterPro DOMAIN/s: TRAF-like (InterPro:IPR008974), MATH (InterPro:IPR002083), BTB/POZ fold (InterPro:IPR011333), BTB/POZ (InterPro:IPR013069), Kelch related (InterPro:IPR013089), BTB/POZ-like (InterPro:IPR000210), TRAF-type (InterPro:IPR013322); BEST Arabidopsis thaliana protein match is: BTB-POZ and MATH domain 5 (TAIR:AT5G21010.1); …	T
'29.5.3'	'protein.degradation.cysteine protease'	'zm00001d049113'	'(at2g27420 : 327.0) Cysteine proteinases superfamily protein; FUNCTIONS IN: cysteine-type peptidase activity, cysteine-type endopeptidase activity; INVOLVED IN: proteolysis; LOCATED IN: endomembrane system; EXPRESSED IN: 15 plant structures; EXPRESSED DURING: 10 growth stages; CONTAINS InterPro DOMAIN/s: Peptidase C1A, papain (InterPro:IPR013128), Proteinase inhibitor I29, cathepsin propeptide (…	T
'29.5.3'	'protein.degradation.cysteine protease'	'zm00001d049109'	'(at4g35350 : 162.0) tracheary element vacuolar protein; xylem cysteine peptidase 1 (XCP1); FUNCTIONS IN: cysteine-type peptidase activity, cysteine-type endopeptidase activity; INVOLVED IN: proteolysis, developmental programmed cell death; LOCATED IN: plant-type vacuole; EXPRESSED IN: 20 plant structures; EXPRESSED DURING: 10 growth stages; CONTAINS InterPro DOMAIN/s: Peptidase C1A, papain (Inte…	T
'29.5.3'	'protein.degradation.cysteine protease'	'zm00001d042481'	'(at3g57810 : 206.0) Cysteine proteinases superfamily protein; FUNCTIONS IN: cysteine-type peptidase activity; INVOLVED IN: biological_process unknown; EXPRESSED IN: 22 plant structures; EXPRESSED DURING: 13 growth stages; CONTAINS InterPro DOMAIN/s: Ovarian tumour, otubain (InterPro:IPR003323); BEST Arabidopsis thaliana protein match is: Cysteine proteinases superfamily protein (TAIR:AT2G38025.1…	T
'29.5.4'	'protein.degradation.aspartate protease'	'zm00001d051779'	'(at2g03200 : 127.0) Eukaryotic aspartyl protease family protein; FUNCTIONS IN: aspartic-type endopeptidase activity; INVOLVED IN: proteolysis; LOCATED IN: endomembrane system; EXPRESSED IN: 10 plant structures; EXPRESSED DURING: 4 anthesis, C globular stage, petal differentiation and expansion stage; CONTAINS InterPro DOMAIN/s: Peptidase aspartic (InterPro:IPR021109), Peptidase aspartic, catalyt…	T
'29.5.4'	'protein.degradation.aspartate protease'	'zm00001d016477'	'(at1g05840 : 272.0) Eukaryotic aspartyl protease family protein; FUNCTIONS IN: aspartic-type endopeptidase activity; INVOLVED IN: proteolysis; LOCATED IN: anchored to membrane; EXPRESSED IN: 23 plant structures; EXPRESSED DURING: 15 growth stages; CONTAINS InterPro DOMAIN/s: Peptidase aspartic, catalytic (InterPro:IPR009007), Peptidase aspartic (InterPro:IPR021109), Peptidase A1 (InterPro:IPR001…	T
'29.5.4'	'protein.degradation.aspartate protease'	'zm00001d007753'	'(at1g03230 : 94.4) Eukaryotic aspartyl protease family protein; FUNCTIONS IN: aspartic-type endopeptidase activity; INVOLVED IN: response to salt stress; LOCATED IN: cell wall, plant-type cell wall; EXPRESSED IN: stem, root; CONTAINS InterPro DOMAIN/s: Peptidase aspartic (InterPro:IPR021109), Peptidase aspartic, catalytic (InterPro:IPR009007), Peptidase A1 (InterPro:IPR001461); BEST Arabidopsis …	T
'29.5.4'	'protein.degradation.aspartate protease'	'zm00001d005859'	'(at2g03200 : 288.0) Eukaryotic aspartyl protease family protein; FUNCTIONS IN: aspartic-type endopeptidase activity; INVOLVED IN: proteolysis; LOCATED IN: endomembrane system; EXPRESSED IN: 10 plant structures; EXPRESSED DURING: 4 anthesis, C globular stage, petal differentiation and expansion stage; CONTAINS InterPro DOMAIN/s: Peptidase aspartic (InterPro:IPR021109), Peptidase aspartic, catalyt…	T
'29.5.4'	'protein.degradation.aspartate protease'	'zm00001d002833'	'(at4g16563 : 181.0) Eukaryotic aspartyl protease family protein; FUNCTIONS IN: aspartic-type endopeptidase activity; INVOLVED IN: proteolysis; LOCATED IN: plant-type cell wall; EXPRESSED IN: 19 plant structures; EXPRESSED DURING: 11 growth stages; CONTAINS InterPro DOMAIN/s: Peptidase aspartic (InterPro:IPR021109), Peptidase aspartic, catalytic (InterPro:IPR009007), Peptidase A1 (InterPro:IPR001…	T
'29.5.5'	'protein.degradation.serine protease'	'zm00001d047634'	'(at1g02560 : 380.0) One of several nuclear-encoded ClpPs (caseinolytic protease). Contains a highly conserved catalytic triad of Ser-type proteases (Ser-His-Asp). The name reflects nomenclature described in Adam et. al (2001).; nuclear encoded CLP protease 5 (CLPP5); FUNCTIONS IN: serine-type endopeptidase activity; INVOLVED IN: peptidyl-cysteine S-nitrosylation; LOCATED IN: in 7 components; EXP…	T
'29.5.5'	'protein.degradation.serine protease'	'zm00001d021231'	'(at1g63120 : 106.0) AtRBL2 has been identified as a rhomboid protein involved in regulated intramembrane proteolysis (RIP). The enzyme has the proteolytic activity and substrate specificity comparable to the Drosophila Rho-1 protein.; RHOMBOID-like 2 (RBL2); CONTAINS InterPro DOMAIN/s: Peptidase S54, rhomboid (InterPro:IPR002610); BEST Arabidopsis thaliana protein match is: RHOMBOID-like protein…	T
'29.5.7'	'protein.degradation.metalloprotease'	'zm00001d033872'	'(at1g17870 : 770.0) S2P-like putative metalloprotease, also contain transmembrane helices near their C-termini and many of them, five of seven, contain a conserved zinc-binding motif HEXXH. Homolog of EGY1. Each of the EGY1 and EGY-like proteins share two additional highly conserved motifs, the previously reported NPDG motif (aa 442帽454 in EGY1, Rudner et al., 1999) and a newly defined GNLR moti…	T
'29.5.7'	'protein.degradation.metalloprotease'	'zm00001d012627'	'(at2g41790 : 229.0) Insulinase (Peptidase family M16) family protein; FUNCTIONS IN: metalloendopeptidase activity, zinc ion binding, catalytic activity, metal ion binding; INVOLVED IN: proteolysis; LOCATED IN: cellular_component unknown; EXPRESSED IN: 23 plant structures; EXPRESSED DURING: 13 growth stages; CONTAINS InterPro DOMAIN/s: Peptidase M16, zinc-binding site (InterPro:IPR001431), Peptid…	T
'29.5.9'	'protein.degradation.AAA type'	'zm00001d021638'	'(at3g50930 : 333.0) cytochrome BC1 synthesis (BCS1); FUNCTIONS IN: nucleoside-triphosphatase activity, ATPase activity, nucleotide binding, ATP binding; LOCATED IN: mitochondrion; EXPRESSED IN: 24 plant structures; EXPRESSED DURING: 13 growth stages; CONTAINS InterPro DOMAIN/s: ATPase, AAA-type, core (InterPro:IPR003959), ATPase, AAA+ type, core (InterPro:IPR003593), ATPase, AAA-type, conserved …	T
'29.5.9'	'protein.degradation.AAA type'	'zm00001d011459'	'(at5g17760 : 290.0) P-loop containing nucleoside triphosphate hydrolases superfamily protein; FUNCTIONS IN: ATP binding; LOCATED IN: plasma membrane; EXPRESSED IN: 23 plant structures; EXPRESSED DURING: 13 growth stages; CONTAINS InterPro DOMAIN/s: ATPase, AAA-type, core (InterPro:IPR003959); BEST Arabidopsis thaliana protein match is: P-loop containing nucleoside triphosphate hydrolases superfa…	T
'29.6'	'protein.folding'	'zm00001d054015'	'(at1g20810 : 242.0) FKBP-like peptidyl-prolyl cis-trans isomerase family protein; FUNCTIONS IN: FK506 binding, peptidyl-prolyl cis-trans isomerase activity; INVOLVED IN: protein folding; LOCATED IN: thylakoid lumen, chloroplast thylakoid lumen, chloroplast; EXPRESSED IN: 21 plant structures; EXPRESSED DURING: 13 growth stages; CONTAINS InterPro DOMAIN/s: Peptidyl-prolyl cis-trans isomerase, FKBP…	T
'29.6'	'protein.folding'	'zm00001d053652'	'(at4g26555 : 207.0) FKBP-like peptidyl-prolyl cis-trans isomerase family protein; FUNCTIONS IN: FK506 binding, peptidyl-prolyl cis-trans isomerase activity; INVOLVED IN: protein folding; LOCATED IN: chloroplast; EXPRESSED IN: 22 plant structures; EXPRESSED DURING: 13 growth stages; CONTAINS InterPro DOMAIN/s: Peptidyl-prolyl cis-trans isomerase, FKBP-type (InterPro:IPR001179); BEST Arabidopsis t…	T
'29.6'	'protein.folding'	'zm00001d045544'	'(at3g13470 : 935.0) TCP-1/cpn60 chaperonin family protein; FUNCTIONS IN: ATP binding; INVOLVED IN: protein folding, protein refolding, cellular protein metabolic process; LOCATED IN: in 7 components; EXPRESSED IN: 26 plant structures; EXPRESSED DURING: 14 growth stages; CONTAINS InterPro DOMAIN/s: Chaperonin Cpn60/TCP-1 (InterPro:IPR002423), Chaperonin Cpn60, conserved site (InterPro:IPR018370),…	T
'29.6'	'protein.folding'	'zm00001d035937'	'(at1g55490 : 935.0) encodes the beta subunit of the chloroplast chaperonin 60, a homologue of bacterial GroEL. Mutants in this gene develops lesions on its leaves, expresses systemic acquired resistance (SAR) and develops accelerated cell death to heat shock stress. The protein has molecular chaperone activity for suppressing protein aggregation in vitro.; chaperonin 60 beta (CPN60B); FUNCTIONS …	T
'29.6'	'protein.folding'	'zm00001d029997'	'(at3g60210 : 154.0) GroES-like family protein; FUNCTIONS IN: ATP binding; INVOLVED IN: protein folding; LOCATED IN: chloroplast, cytoplasm; EXPRESSED IN: 22 plant structures; EXPRESSED DURING: 13 growth stages; CONTAINS InterPro DOMAIN/s: Chaperonin Cpn10 (InterPro:IPR020818), GroES-like (InterPro:IPR011032), Chaperonin Cpn10, subgroup (InterPro:IPR001476); BEST Arabidopsis thaliana protein matc…	T
'29.6'	'protein.folding'	'zm00001d020058'	'(at3g12580 : 129.0) heat shock protein 70 (HSP70); FUNCTIONS IN: ATP binding; INVOLVED IN: in 9 processes; LOCATED IN: cytosol, mitochondrion, cell wall, plasma membrane; EXPRESSED IN: 23 plant structures; EXPRESSED DURING: 11 growth stages; CONTAINS InterPro DOMAIN/s: Heat shock protein 70, conserved site (InterPro:IPR018181), Heat shock protein Hsp70 (InterPro:IPR001023), Heat shock protein 70…	T
'29.6'	'protein.folding'	'zm00001d017187'	'(at5g17710 : 277.0) embryo defective 1241 (EMB1241); FUNCTIONS IN: copper ion binding; INVOLVED IN: protein folding, embryo development ending in seed dormancy; LOCATED IN: thylakoid, chloroplast; EXPRESSED IN: 25 plant structures; EXPRESSED DURING: 14 growth stages; CONTAINS InterPro DOMAIN/s: GrpE nucleotide exchange factor (InterPro:IPR000740), GrpE nucleotide exchange factor, coiled-coil (In…	T
'29.6'	'protein.folding'	'zm00001d016714'	'(at5g06130 : 296.0) chaperone protein dnaJ-related; LOCATED IN: chloroplast; EXPRESSED IN: 22 plant structures; EXPRESSED DURING: 13 growth stages; BEST Arabidopsis thaliana protein match is: unknown protein (TAIR:AT5G61670.2); Has 30201 Blast hits to 17322 proteins in 780 species: Archae - 12; Bacteria - 1396; Metazoa - 17338; Fungi - 3422; Plants - 5037; Viruses - 0; Other Eukaryotes - 2996 (s…	T
'29.6'	'protein.folding'	'zm00001d016159'	'(at1g29990 : 157.0) Encodes a cytoplastic protein with similarity to yeast prefoldin6, a subunit of the prefoldin complex. The PFD complex is thought to function along with the TCP ring complex to properly fold microtubule proteins.; prefoldin 6 (PFD6); FUNCTIONS IN: unfolded protein binding; INVOLVED IN: protein folding, cortical microtubule organization; LOCATED IN: prefoldin complex, cytoplas…	T
'29.6'	'protein.folding'	'zm00001d015221'	'(at5g26360 : 91.7) TCP-1/cpn60 chaperonin family protein; FUNCTIONS IN: unfolded protein binding, ATP binding; INVOLVED IN: protein folding, cellular protein metabolic process; EXPRESSED IN: 22 plant structures; EXPRESSED DURING: 13 growth stages; CONTAINS InterPro DOMAIN/s: Chaperonin Cpn60/TCP-1 (InterPro:IPR002423), Chaperone, tailless complex polypeptide 1 (InterPro:IPR017998), T-complex pro…	T
'29.7'	'protein.glycosylation'	'zm00001d013052'	'(at5g62620 : 797.0) Galactosyltransferase family protein; FUNCTIONS IN: transferase activity, transferring hexosyl groups, sugar binding, galactosyltransferase activity; INVOLVED IN: protein amino acid glycosylation; EXPRESSED IN: 22 plant structures; EXPRESSED DURING: 13 growth stages; CONTAINS InterPro DOMAIN/s: Galectin, carbohydrate recognition domain (InterPro:IPR001079), Glycosyl transfera…	T
'29.8'	'protein.assembly and cofactor ligation'	'zm00001d042008'	'(at1g54500 : 199.0) Rubredoxin-like superfamily protein; FUNCTIONS IN: electron carrier activity, metal ion binding; LOCATED IN: chloroplast thylakoid membrane, chloroplast; EXPRESSED IN: 21 plant structures; EXPRESSED DURING: 13 growth stages; CONTAINS InterPro DOMAIN/s: Rubredoxin, iron-binding site (InterPro:IPR018527), Rubredoxin-type Fe(Cys)4 protein (InterPro:IPR004039); Has 3108 Blast hit…	T
'29.8'	'protein.assembly and cofactor ligation'	'zm00001d034540'	'(at1g54500 : 187.0) Rubredoxin-like superfamily protein; FUNCTIONS IN: electron carrier activity, metal ion binding; LOCATED IN: chloroplast thylakoid membrane, chloroplast; EXPRESSED IN: 21 plant structures; EXPRESSED DURING: 13 growth stages; CONTAINS InterPro DOMAIN/s: Rubredoxin, iron-binding site (InterPro:IPR018527), Rubredoxin-type Fe(Cys)4 protein (InterPro:IPR004039); Has 3108 Blast hit…	T
'3.4.3'	'minor CHO metabolism.myo-inositol.InsP Synthases'	'zm00001d014292'	'(q9fpk7|ino1_maize : 871.0) Inositol-3-phosphate synthase (EC 5.5.1.4) (Myo-inositol-1-phosphate synthase) (MI-1-P synthase) (IPS) - Zea mays (Maize) & (at2g22240 : 837.0) ** Referred to as MIPS1 in Mitsuhashi et al 2008. Myo-inositol-1-phosphate synthase isoform 2. Expressed in leaf, root and silique. Immunolocalization experiments with an antibody recognizing MIPS1, MIPS2, and MIPS3 showed end…	T
'3.5'	'minor CHO metabolism.others'	'zm00001d025354'	'(q56ud4|inv2_orysa : 897.0) Beta-fructofuranosidase, insoluble isoenzyme 2 precursor (EC 3.2.1.26) (Sucrose hydrolase 2) (Invertase 2) (Cell wall beta-fructosidase 2) (OsCIN2) - Oryza sativa (Rice) & (at3g52600 : 573.0) cell wall invertase 2 (CWINV2); FUNCTIONS IN: hydrolase activity, hydrolyzing O-glycosyl compounds; INVOLVED IN: carbohydrate metabolic process; EXPRESSED IN: 9 plant structures;…	T
'3.5'	'minor CHO metabolism.others'	'zm00001d003086'	'(at1g06690 : 508.0) NAD(P)-linked oxidoreductase superfamily protein; FUNCTIONS IN: oxidoreductase activity, aldo-keto reductase activity; INVOLVED IN: oxidation reduction; LOCATED IN: chloroplast thylakoid membrane, chloroplast, plastoglobule, chloroplast envelope; EXPRESSED IN: 22 plant structures; EXPRESSED DURING: 14 growth stages; CONTAINS InterPro DOMAIN/s: Aldo/keto reductase (InterPro:IP…	T
'3.6'	'minor CHO metabolism.callose'	'zm00001d044566'	'(at1g06490 : 1488.0) encodes a gene similar to callose synthase; glucan synthase-like 7 (GSL07); FUNCTIONS IN: transferase activity, transferring glycosyl groups, 1,3-beta-glucan synthase activity; INVOLVED IN: 1,3-beta-glucan biosynthetic process; LOCATED IN: 1,3-beta-glucan synthase complex, membrane; EXPRESSED IN: 20 plant structures; EXPRESSED DURING: 13 growth stages; CONTAINS InterPro DOMA…	T
'3.99'	'minor CHO metabolism.misc'	'zm00001d034887'	'(at5g47760 : 401.0) serine/threonine protein kinase; 2-phosphoglycolate phosphatase 2 (PGLP2); FUNCTIONS IN: protein serine/threonine kinase activity, phosphoglycolate phosphatase activity; INVOLVED IN: metabolic process; LOCATED IN: chloroplast; EXPRESSED IN: 26 plant structures; EXPRESSED DURING: 13 growth stages; CONTAINS InterPro DOMAIN/s: HAD-superfamily hydrolase, subfamily IIA (InterPro:I…	T
'30.1'	'signalling.in sugar and nutrient physiology'	'zm00001d018332'	'(at2g29110 : 603.0) member of Putative ligand-gated ion channel subunit family; glutamate receptor 2.8 (GLR2.8); FUNCTIONS IN: intracellular ligand-gated ion channel activity; INVOLVED IN: cellular calcium ion homeostasis, response to light stimulus; LOCATED IN: endomembrane system, membrane; EXPRESSED IN: 7 plant structures; EXPRESSED DURING: 6 growth stages; CONTAINS InterPro DOMAIN/s: Extrace…	T
'30.11'	'signalling.light'	'novel00504'	'(at1g30440 : 132.0) Phototropic-responsive NPH3 family protein; FUNCTIONS IN: signal transducer activity; INVOLVED IN: response to light stimulus; LOCATED IN: plasma membrane; EXPRESSED IN: 22 plant structures; EXPRESSED DURING: 13 growth stages; CONTAINS InterPro DOMAIN/s: NPH3 (InterPro:IPR004249), BTB/POZ (InterPro:IPR013069), BTB/POZ fold (InterPro:IPR011333), BTB/POZ-like (InterPro:IPR00021…	T
'30.2.11'	'signalling.receptor kinases.leucine rich repeat XI'	'zm00001d050074'	'(p93194|rpk1_iponi : 1000.0) Receptor-like protein kinase precursor (EC 2.7.11.1) - Ipomoea nil (Japanese morning glory) (Pharbitis nil) & (at1g73080 : 933.0) Encodes a leucine-rich repeat receptor kinase. Functions as a receptor for AtPep1 to amplify innate immunity response to pathogen attacks.; PEP1 receptor 1 (PEPR1); FUNCTIONS IN: protein binding, protein serine/threonine kinase activity, k…	T
'30.2.11'	'signalling.receptor kinases.leucine rich repeat XI'	'zm00001d043512'	'(at5g25930 : 687.0) Protein kinase family protein with leucine-rich repeat domain; FUNCTIONS IN: kinase activity; INVOLVED IN: protein amino acid phosphorylation; LOCATED IN: plasma membrane, membrane; EXPRESSED IN: 23 plant structures; EXPRESSED DURING: 14 growth stages; CONTAINS InterPro DOMAIN/s: Protein kinase, ATP binding site (InterPro:IPR017441), Protein kinase, catalytic domain (InterPro…	T
'30.2.12'	'signalling.receptor kinases.leucine rich repeat XII'	'zm00001d041298'	'(at3g47090 : 716.0) Leucine-rich repeat protein kinase family protein; FUNCTIONS IN: protein serine/threonine kinase activity, kinase activity, ATP binding; INVOLVED IN: transmembrane receptor protein tyrosine kinase signaling pathway, protein amino acid phosphorylation; LOCATED IN: chloroplast; CONTAINS InterPro DOMAIN/s: Protein kinase, ATP binding site (InterPro:IPR017441), Protein kinase, ca…	T
'30.2.12'	'signalling.receptor kinases.leucine rich repeat XII'	'zm00001d008632'	'(at3g47570 : 674.0) Leucine-rich repeat protein kinase family protein; FUNCTIONS IN: protein serine/threonine kinase activity, kinase activity, ATP binding; INVOLVED IN: transmembrane receptor protein tyrosine kinase signaling pathway, protein amino acid phosphorylation; LOCATED IN: plasma membrane; EXPRESSED IN: 13 plant structures; EXPRESSED DURING: 8 growth stages; CONTAINS InterPro DOMAIN/s:…	T
'30.2.15'	'signalling.receptor kinases.thaumatin like'	'zm00001d008477'	'(at5g38260 : 211.0) Protein kinase superfamily protein; FUNCTIONS IN: kinase activity; INVOLVED IN: protein amino acid phosphorylation; LOCATED IN: endomembrane system; CONTAINS InterPro DOMAIN/s: Protein kinase, ATP binding site (InterPro:IPR017441), Protein kinase, catalytic domain (InterPro:IPR000719), Serine-threonine/tyrosine-protein kinase (InterPro:IPR001245), Protein kinase-like domain (…	T
'30.2.16'	'signalling.receptor kinases.Catharanthus roseus-like RLK1'	'zm00001d008477'	'(at5g38260 : 211.0) Protein kinase superfamily protein; FUNCTIONS IN: kinase activity; INVOLVED IN: protein amino acid phosphorylation; LOCATED IN: endomembrane system; CONTAINS InterPro DOMAIN/s: Protein kinase, ATP binding site (InterPro:IPR017441), Protein kinase, catalytic domain (InterPro:IPR000719), Serine-threonine/tyrosine-protein kinase (InterPro:IPR001245), Protein kinase-like domain (…	T
'30.2.17'	'signalling.receptor kinases.DUF 26'	'zm00001d034555'	'(at3g07040 : 139.0) Contains an N-terminal tripartite nucleotide binding site and a C-terminal tandem array of leucine-rich repeats. Confers resistance to Pseudomonas syringae strains that carry the avirulence genes avrB and avrRpm1.; RESISTANCE TO P. SYRINGAE PV MACULICOLA 1 (RPM1); FUNCTIONS IN: protein binding, nucleotide binding; INVOLVED IN: defense response, plant-type hypersensitive respo…	T
'30.2.17'	'signalling.receptor kinases.DUF 26'	'zm00001d021684'	'(at1g11330 : 380.0) S-locus lectin protein kinase family protein; FUNCTIONS IN: in 6 functions; INVOLVED IN: protein amino acid phosphorylation, recognition of pollen; LOCATED IN: plasma membrane; EXPRESSED IN: 21 plant structures; EXPRESSED DURING: 13 growth stages; CONTAINS InterPro DOMAIN/s: Curculin-like (mannose-binding) lectin (InterPro:IPR001480), Apple-like (InterPro:IPR003609), PAN-2 do…	T
'30.2.19'	'signalling.receptor kinases.legume-lectin'	'zm00001d052906'	'(at5g06740 : 254.0) Concanavalin A-like lectin protein kinase family protein; FUNCTIONS IN: in 6 functions; INVOLVED IN: protein amino acid phosphorylation; LOCATED IN: endomembrane system; EXPRESSED IN: root; CONTAINS InterPro DOMAIN/s: Legume lectin, beta chain (InterPro:IPR001220), Protein kinase, ATP binding site (InterPro:IPR017441), Serine/threonine-protein kinase-like domain (InterPro:IPR…	T
'30.2.19'	'signalling.receptor kinases.legume-lectin'	'zm00001d042293'	'(at3g53380 : 242.0) Concanavalin A-like lectin protein kinase family protein; FUNCTIONS IN: carbohydrate binding, kinase activity; INVOLVED IN: protein amino acid phosphorylation; LOCATED IN: plasma membrane; EXPRESSED IN: 11 plant structures; EXPRESSED DURING: 6 growth stages; CONTAINS InterPro DOMAIN/s: Legume lectin, beta chain (InterPro:IPR001220), Protein kinase, ATP binding site (InterPro:…	T
'30.2.2'	'signalling.receptor kinases.leucine rich repeat II'	'zm00001d000298'	'(at1g71830 : 197.0) Plasma membrane LRR receptor-like serine threonine kinase expressed during embryogenesis in locules until stage 6 anthers, with higher expression in the tapetal cell layer. SERK1 and SERK2 receptor kinases function redundantly as an important control point for sporophytic development controlling male gametophyte production. later; somatic embryogenesis receptor-like kinase 1 …	T
'30.2.20'	'signalling.receptor kinases.wheat LRK10 like'	'zm00001d026489'	'(at4g32300 : 261.0) S-domain-2 5 (SD2-5); FUNCTIONS IN: carbohydrate binding, protein kinase activity, kinase activity; INVOLVED IN: protein amino acid autophosphorylation; LOCATED IN: plasma membrane; EXPRESSED IN: 25 plant structures; EXPRESSED DURING: 15 growth stages; CONTAINS InterPro DOMAIN/s: Curculin-like (mannose-binding) lectin (InterPro:IPR001480), Protein kinase, ATP binding site (In…	T
'30.2.20'	'signalling.receptor kinases.wheat LRK10 like'	'zm00001d009473'	'(at1g18390 : 443.0) Protein kinase superfamily protein; FUNCTIONS IN: protein serine/threonine kinase activity, protein kinase activity, kinase activity, ATP binding; INVOLVED IN: protein amino acid phosphorylation; EXPRESSED IN: 22 plant structures; EXPRESSED DURING: 13 growth stages; CONTAINS InterPro DOMAIN/s: Protein kinase, ATP binding site (InterPro:IPR017441), Protein kinase, catalytic do…	T
'30.2.20'	'signalling.receptor kinases.wheat LRK10 like'	'zm00001d008477'	'(at5g38260 : 211.0) Protein kinase superfamily protein; FUNCTIONS IN: kinase activity; INVOLVED IN: protein amino acid phosphorylation; LOCATED IN: endomembrane system; CONTAINS InterPro DOMAIN/s: Protein kinase, ATP binding site (InterPro:IPR017441), Protein kinase, catalytic domain (InterPro:IPR000719), Serine-threonine/tyrosine-protein kinase (InterPro:IPR001245), Protein kinase-like domain (…	T
'30.2.22'	'signalling.receptor kinases.proline extensin like'	'zm00001d037811'	'(at3g24550 : 440.0) encodes an ortholog of Brassica napus proline extensin-like receptor kinase. Expression of the brassica gene is induced by wounding and fungal infection.; proline extensin-like receptor kinase 1 (PERK1); FUNCTIONS IN: protein kinase activity, ATP binding; INVOLVED IN: protein amino acid phosphorylation, response to fungus, response to wounding; LOCATED IN: plasma membrane; EX…	T
'30.2.24'	'signalling.receptor kinases.S-locus glycoprotein like'	'zm00001d043252'	'(at4g21380 : 373.0) encodes a putative receptor-like serine/threonine protein kinases that is similar to Brassica self-incompatibility (S) locus. Expressed in root. Shoot expression limited to limited to the root-hypocotyl transition zone and at the base of lateral roots as well as in axillary buds, and pedicels.; receptor kinase 3 (RK3); FUNCTIONS IN: transmembrane receptor protein serine/threo…	T
'30.2.24'	'signalling.receptor kinases.S-locus glycoprotein like'	'zm00001d034555'	'(at3g07040 : 139.0) Contains an N-terminal tripartite nucleotide binding site and a C-terminal tandem array of leucine-rich repeats. Confers resistance to Pseudomonas syringae strains that carry the avirulence genes avrB and avrRpm1.; RESISTANCE TO P. SYRINGAE PV MACULICOLA 1 (RPM1); FUNCTIONS IN: protein binding, nucleotide binding; INVOLVED IN: defense response, plant-type hypersensitive respo…	T
'30.2.24'	'signalling.receptor kinases.S-locus glycoprotein like'	'zm00001d026489'	'(at4g32300 : 261.0) S-domain-2 5 (SD2-5); FUNCTIONS IN: carbohydrate binding, protein kinase activity, kinase activity; INVOLVED IN: protein amino acid autophosphorylation; LOCATED IN: plasma membrane; EXPRESSED IN: 25 plant structures; EXPRESSED DURING: 15 growth stages; CONTAINS InterPro DOMAIN/s: Curculin-like (mannose-binding) lectin (InterPro:IPR001480), Protein kinase, ATP binding site (In…	T
'30.2.24'	'signalling.receptor kinases.S-locus glycoprotein like'	'zm00001d021684'	'(at1g11330 : 380.0) S-locus lectin protein kinase family protein; FUNCTIONS IN: in 6 functions; INVOLVED IN: protein amino acid phosphorylation, recognition of pollen; LOCATED IN: plasma membrane; EXPRESSED IN: 21 plant structures; EXPRESSED DURING: 13 growth stages; CONTAINS InterPro DOMAIN/s: Curculin-like (mannose-binding) lectin (InterPro:IPR001480), Apple-like (InterPro:IPR003609), PAN-2 do…	T
'30.2.25'	'signalling.receptor kinases.wall associated kinase'	'zm00001d050466'	'(at1g21270 : 228.0) cytoplasmic serine/threonine protein kinase induced by salicylic acid. mutant plants exhibit a loss of cell expansion and dependence on sugars and salts for seedling growth, affecting the expression and activity of vacuolar invertase.; wall-associated kinase 2 (WAK2); FUNCTIONS IN: protein serine/threonine kinase activity, protein kinase activity, calcium ion binding, ATP bin…	T
'30.2.25'	'signalling.receptor kinases.wall associated kinase'	'zm00001d024744'	'(at1g21210 : 217.0) cell wall-associated ser/thr kinase involved in cell elongation and lateral root development; wall associated kinase 4 (WAK4); FUNCTIONS IN: protein serine/threonine kinase activity, protein kinase activity, ATP binding, calcium ion binding; INVOLVED IN: protein amino acid phosphorylation, unidimensional cell growth, lateral root development; LOCATED IN: plasma membrane; EXPR…	T
'30.2.5'	'signalling.receptor kinases.leucine rich repeat V'	'zm00001d053761'	'(at4g03390 : 323.0) STRUBBELIG-receptor family 3 (SRF3); FUNCTIONS IN: protein serine/threonine kinase activity, kinase activity, ATP binding; INVOLVED IN: transmembrane receptor protein tyrosine kinase signaling pathway, protein amino acid phosphorylation; LOCATED IN: plasma membrane; EXPRESSED IN: 23 plant structures; EXPRESSED DURING: 13 growth stages; CONTAINS InterPro DOMAIN/s: Protein kina…	T
'30.2.5'	'signalling.receptor kinases.leucine rich repeat V'	'zm00001d030551'	'(at1g53730 : 745.0) STRUBBELIG-receptor family 6 (SRF6); FUNCTIONS IN: protein serine/threonine kinase activity, protein kinase activity, ATP binding; INVOLVED IN: transmembrane receptor protein tyrosine kinase signaling pathway, protein amino acid phosphorylation; LOCATED IN: plasma membrane; EXPRESSED IN: 22 plant structures; EXPRESSED DURING: 13 growth stages; CONTAINS InterPro DOMAIN/s: Prot…	T
'30.2.8.1'	'signalling.receptor kinases.leucine rich repeat VIII.VIII-1'	'zm00001d038522'	'(at1g79620 : 989.0) Leucine-rich repeat protein kinase family protein; FUNCTIONS IN: protein serine/threonine kinase activity, kinase activity, ATP binding; INVOLVED IN: transmembrane receptor protein tyrosine kinase signaling pathway, protein amino acid phosphorylation; LOCATED IN: endomembrane system; EXPRESSED IN: 8 plant structures; EXPRESSED DURING: 4 anthesis, petal differentiation and exp…	T
'30.2.8.2'	'signalling.receptor kinases.leucine rich repeat VIII.VIII-2'	'zm00001d034555'	'(at3g07040 : 139.0) Contains an N-terminal tripartite nucleotide binding site and a C-terminal tandem array of leucine-rich repeats. Confers resistance to Pseudomonas syringae strains that carry the avirulence genes avrB and avrRpm1.; RESISTANCE TO P. SYRINGAE PV MACULICOLA 1 (RPM1); FUNCTIONS IN: protein binding, nucleotide binding; INVOLVED IN: defense response, plant-type hypersensitive respo…	T
'30.2.8.2'	'signalling.receptor kinases.leucine rich repeat VIII.VIII-2'	'zm00001d016242'	'(at1g53430 : 650.0) Leucine-rich repeat transmembrane protein kinase; FUNCTIONS IN: kinase activity; INVOLVED IN: protein amino acid phosphorylation; LOCATED IN: plasma membrane; EXPRESSED IN: 23 plant structures; EXPRESSED DURING: 13 growth stages; CONTAINS InterPro DOMAIN/s: Serine/threonine-protein kinase domain (InterPro:IPR002290), Leucine-rich repeat (InterPro:IPR001611), Serine-threonine/…	T
'30.2.99'	'signalling.receptor kinases.misc'	'zm00001d044975'	'(p10290|mybc_maize : 426.0) Anthocyanin regulatory C1 protein - Zea mays (Maize) & (at4g34990 : 176.0) Member of the R2R3 factor gene family.; myb domain protein 32 (MYB32); CONTAINS InterPro DOMAIN/s: SANT, DNA-binding (InterPro:IPR001005), Homeodomain-like (InterPro:IPR009057), Myb, DNA-binding (InterPro:IPR014778), HTH transcriptional regulator, Myb-type, DNA-binding (InterPro:IPR017930), Hom…	T
'30.2.99'	'signalling.receptor kinases.misc'	'zm00001d028808'	'(at5g01740 : 94.0) Nuclear transport factor 2 (NTF2) family protein; CONTAINS InterPro DOMAIN/s: Wound-induced protein, Wun1 (InterPro:IPR009798); BEST Arabidopsis thaliana protein match is: senescence associated gene 20 (TAIR:AT3G10985.1); Has 1807 Blast hits to 1807 proteins in 277 species: Archae - 0; Bacteria - 0; Metazoa - 736; Fungi - 347; Plants - 385; Viruses - 0; Other Eukaryotes - 339 …	T
'30.2.99'	'signalling.receptor kinases.misc'	'zm00001d018665'	'(at3g02130 : 536.0) receptor-like protein kinase 2 (RPK2); FUNCTIONS IN: protein serine/threonine kinase activity, kinase activity, ATP binding; INVOLVED IN: lignin metabolic process, protein amino acid phosphorylation, transmembrane receptor protein tyrosine kinase signaling pathway, pollen maturation, anther dehiscence; LOCATED IN: plasma membrane; EXPRESSED IN: 28 plant structures; EXPRESSED …	T
'30.3'	'signalling.calcium'	'zm00001d053926'	'(at2g46600 : 87.8) Calcium-binding EF-hand family protein; FUNCTIONS IN: calcium ion binding; LOCATED IN: cellular_component unknown; EXPRESSED IN: 24 plant structures; EXPRESSED DURING: 14 growth stages; CONTAINS InterPro DOMAIN/s: EF-Hand 1, calcium-binding site (InterPro:IPR018247), EF-HAND 2 (InterPro:IPR018249), EF-hand-like domain (InterPro:IPR011992); BEST Arabidopsis thaliana protein mat…	T
'30.3'	'signalling.calcium'	'zm00001d046625'	'(at4g34150 : 158.0) Calcium-dependent lipid-binding (CaLB domain) family protein; CONTAINS InterPro DOMAIN/s: C2 membrane targeting protein (InterPro:IPR018029), C2 calcium/lipid-binding domain, CaLB (InterPro:IPR008973), C2 calcium-dependent membrane targeting (InterPro:IPR000008); BEST Arabidopsis thaliana protein match is: soybean gene regulated by cold-2 (TAIR:AT1G09070.1); Has 30201 Blast h…	T
'30.3'	'signalling.calcium'	'zm00001d043144'	'(at2g27030 : 259.0) encodes a calmodulin that has higher affinity to kinesin-like calmodulin binding motor protein than CAM4 or CAM6.; calmodulin 5 (CAM5); FUNCTIONS IN: calcium ion binding; LOCATED IN: plasma membrane; EXPRESSED IN: 23 plant structures; EXPRESSED DURING: 16 growth stages; CONTAINS InterPro DOMAIN/s: EF-Hand 1, calcium-binding site (InterPro:IPR018247), EF-HAND 2 (InterPro:IPR01…	T
'30.3'	'signalling.calcium'	'zm00001d041430'	'(at3g22930 : 211.0) Encodes a calmodulin-like protein.; calmodulin-like 11 (CML11); FUNCTIONS IN: calcium ion binding; INVOLVED IN: biological_process unknown; EXPRESSED IN: 7 plant structures; EXPRESSED DURING: LP.06 six leaves visible, LP.04 four leaves visible, LP.10 ten leaves visible, LP.08 eight leaves visible, LP.12 twelve leaves visible; CONTAINS InterPro DOMAIN/s: EF-Hand 1, calcium-bin…	T
'30.3'	'signalling.calcium'	'zm00001d035377'	'(at3g52870 : 452.0) IQ calmodulin-binding motif family protein; CONTAINS InterPro DOMAIN/s: IQ calmodulin-binding region (InterPro:IPR000048); BEST Arabidopsis thaliana protein match is: calmodulin-binding family protein (TAIR:AT3G58480.1); Has 341 Blast hits to 277 proteins in 58 species: Archae - 0; Bacteria - 26; Metazoa - 0; Fungi - 100; Plants - 209; Viruses - 0; Other Eukaryotes - 6 (sourc…	T
'30.3'	'signalling.calcium'	'zm00001d032932'	'(at4g14750 : 187.0) IQ-domain 19 (IQD19); CONTAINS InterPro DOMAIN/s: IQ calmodulin-binding region (InterPro:IPR000048); BEST Arabidopsis thaliana protein match is: IQ-domain 26 (TAIR:AT3G16490.1); Has 2338 Blast hits to 1945 proteins in 201 species: Archae - 4; Bacteria - 168; Metazoa - 612; Fungi - 134; Plants - 1079; Viruses - 66; Other Eukaryotes - 275 (source: NCBI BLink). & (reliability: 3…	T
'30.3'	'signalling.calcium'	'zm00001d028252'	'(at2g33380 : 130.0) Encodes a calcium binding protein whose mRNA is induced upon treatment with NaCl, ABA and in response to dessication. mRNA expression under drought conditions is apparent particularly in leaves and flowers. Isoform of caleosin with a role as a peroxygenase involved in oxylipin metabolism during biotic and abiotic stress.; RESPONSIVE TO DESSICATION 20 (RD20); FUNCTIONS IN: lip…	T
'30.3'	'signalling.calcium'	'zm00001d027815'	'(at3g13600 : 498.0) calmodulin-binding family protein; CONTAINS InterPro DOMAIN/s: IQ calmodulin-binding region (InterPro:IPR000048); BEST Arabidopsis thaliana protein match is: calmodulin-binding family protein (TAIR:AT3G58480.1); Has 2440 Blast hits to 1727 proteins in 273 species: Archae - 4; Bacteria - 163; Metazoa - 734; Fungi - 252; Plants - 308; Viruses - 55; Other Eukaryotes - 924 (sourc…	T
'30.3'	'signalling.calcium'	'zm00001d026139'	'(p53683|cdpk2_orysa : 654.0) Calcium-dependent protein kinase, isoform 2 (EC 2.7.11.1) (CDPK 2) - Oryza sativa (Rice) & (at3g20410 : 643.0) calmodulin-domain protein kinase CDPK isoform 9 (CPK9); calmodulin-domain protein kinase 9 (CPK9); FUNCTIONS IN: calmodulin-dependent protein kinase activity, kinase activity; INVOLVED IN: signal transduction, protein amino acid phosphorylation, N-terminal p…	T
'30.3'	'signalling.calcium'	'zm00001d026018'	'(at4g35310 : 639.0) calmodulin-domain protein kinase CDPK isoform 5 (CPK5); calmodulin-domain protein kinase 5 (CPK5); FUNCTIONS IN: in 6 functions; INVOLVED IN: protein amino acid phosphorylation, N-terminal protein myristoylation; LOCATED IN: cytosol, plasma membrane, membrane; EXPRESSED IN: 23 plant structures; EXPRESSED DURING: 13 growth stages; CONTAINS InterPro DOMAIN/s: Protein kinase, AT…	T
'30.3'	'signalling.calcium'	'zm00001d023843'	'(at5g57580 : 233.0) Calmodulin-binding protein; CONTAINS InterPro DOMAIN/s: Calmodulin binding protein-like (InterPro:IPR012416); BEST Arabidopsis thaliana protein match is: Calmodulin-binding protein (TAIR:AT4G25800.2); Has 341 Blast hits to 322 proteins in 21 species: Archae - 0; Bacteria - 2; Metazoa - 0; Fungi - 0; Plants - 339; Viruses - 0; Other Eukaryotes - 0 (source: NCBI BLink). & (reli…	T
'30.3'	'signalling.calcium'	'zm00001d020722'	'(at2g15680 : 123.0) Calcium-binding EF-hand family protein; FUNCTIONS IN: calcium ion binding; INVOLVED IN: biological_process unknown; EXPRESSED IN: 13 plant structures; EXPRESSED DURING: 9 growth stages; CONTAINS InterPro DOMAIN/s: EF-Hand 1, calcium-binding site (InterPro:IPR018247), Recoverin (InterPro:IPR001125), EF-HAND 2 (InterPro:IPR018249), EF-hand-like domain (InterPro:IPR011992), Calc…	T
'30.3'	'signalling.calcium'	'zm00001d008570'	'(at5g57580 : 221.0) Calmodulin-binding protein; CONTAINS InterPro DOMAIN/s: Calmodulin binding protein-like (InterPro:IPR012416); BEST Arabidopsis thaliana protein match is: Calmodulin-binding protein (TAIR:AT4G25800.2); Has 341 Blast hits to 322 proteins in 21 species: Archae - 0; Bacteria - 2; Metazoa - 0; Fungi - 0; Plants - 339; Viruses - 0; Other Eukaryotes - 0 (source: NCBI BLink). & (reli…	T
'30.3'	'signalling.calcium'	'zm00001d007890'	'(at1g55500 : 359.0) evolutionarily conserved C-terminal region 4 (ECT4); FUNCTIONS IN: molecular_function unknown; INVOLVED IN: biological_process unknown; LOCATED IN: cellular_component unknown; EXPRESSED IN: 21 plant structures; EXPRESSED DURING: 11 growth stages; CONTAINS InterPro DOMAIN/s: YTH domain (InterPro:IPR007275); BEST Arabidopsis thaliana protein match is: evolutionarily conserved C…	T
'30.4.3'	'signalling.phosphinositides.bis(5''-nucleosyl)-tetraphosphatase'	'novel00311'	'(at3g10620 : 247.0) nudix hydrolase homolog 26 (NUDX26); CONTAINS InterPro DOMAIN/s: NUDIX hydrolase domain-like (InterPro:IPR015797), NUDIX hydrolase (InterPro:IPR020476), NUDIX hydrolase, conserved site (InterPro:IPR020084), NUDIX hydrolase domain (InterPro:IPR000086); BEST Arabidopsis thaliana protein match is: nudix hydrolase homolog 27 (TAIR:AT5G06340.1); Has 4741 Blast hits to 4739 protein…	T
'30.5'	'signalling.G-proteins'	'zm00001d048393'	'(at5g03530 : 300.0) Encodes a member of the Rab GTPase family of proteins. This protein interacts with the tail region of a myosin XI protein (AT5G43900) in a GTP-dependent manner. CFP:RabC2a appears to co-localize with peroxisomes.; RAB GTPase homolog C2A (RABC2A); FUNCTIONS IN: GTP binding, myosin XI tail binding, GTP-dependent protein binding; INVOLVED IN: protein transport, small GTPase medi…	T
'30.5'	'signalling.G-proteins'	'zm00001d025660'	'(p49104|rab2b_maize : 387.0) Ras-related protein Rab-2-B - Zea mays (Maize) & (at4g17170 : 372.0) member of RAB gene family; RAB GTPase homolog B1C (RABB1C); FUNCTIONS IN: GTP binding, GTPase activity; INVOLVED IN: ER to Golgi vesicle-mediated transport, pollen sperm cell differentiation, cell growth; LOCATED IN: plasma membrane, vacuole, membrane; EXPRESSED IN: 26 plant structures; EXPRESSED DU…	T
'30.5'	'signalling.G-proteins'	'zm00001d021087'	'(at5g13300 : 1060.0) Belongs to 15-member small GTPase gene family, ARF-GAP domain proteins (AGD); corresponds to AGD3, and is one of four proteins belonging to class 1, together with AGD1, AGD2 and AGD4. The protein contains four domains: BAR domain, PH domain, an ARF-GAP domain, and two Ankyrin repeats. In sfc mutants, the secondary and tertiary veins of cotyledons, leaves, sepals and petals a…	T
'30.5'	'signalling.G-proteins'	'zm00001d017755'	'(at1g31650 : 328.0) Encodes a member of KPP-like gene family, homolog of KPP (kinase partner protein) gene in tomato. Also a member of the RopGEF (guanine nucleotide exchange factor) family, containing the novel PRONE domain (plant-specific Rop nucleotide exchanger), which is exclusively active towards members of the Rop subfamily.; RHO guanyl-nucleotide exchange factor 14 (ROPGEF14); CONTAINS I…	T
'30.5'	'signalling.G-proteins'	'zm00001d014278'	'(q40522|rb11d_tobac : 346.0) Ras-related protein Rab11D - Nicotiana tabacum (Common tobacco) & (at5g65270 : 332.0) RAB GTPase homolog A4A (RABA4a); FUNCTIONS IN: GTP binding; INVOLVED IN: protein transport, small GTPase mediated signal transduction; LOCATED IN: plasma membrane, membrane; EXPRESSED IN: 24 plant structures; EXPRESSED DURING: 13 growth stages; CONTAINS InterPro DOMAIN/s: Ras GTPase…	T
'30.5'	'signalling.G-proteins'	'zm00001d011373'	'(at3g61670 : 111.0) Protein of unknown function (DUF3133); FUNCTIONS IN: molecular_function unknown; INVOLVED IN: biological_process unknown; LOCATED IN: plasma membrane; EXPRESSED IN: 22 plant structures; EXPRESSED DURING: 13 growth stages; CONTAINS InterPro DOMAIN/s: Protein of unknown function DUF3133 (InterPro:IPR021480); BEST Arabidopsis thaliana protein match is: Protein of unknown functio…	T
'30.5'	'signalling.G-proteins'	'zm00001d011328'	'(at5g20010 : 341.0) A member of RAN GTPase gene family. Encodes a small soluble GTP-binding protein. Likely to be involved in nuclear translocation of proteins. May also be involved in cell cycle progression.; RAS-related nuclear protein-1 (RAN-1); FUNCTIONS IN: protein binding, GTP binding, GTPase activity; INVOLVED IN: response to cadmium ion, response to salt stress, protein import into nucle…	T
'30.5'	'signalling.G-proteins'	'zm00001d008595'	'(at2g43120 : 373.0) RmlC-like cupins superfamily protein; FUNCTIONS IN: calmodulin binding; INVOLVED IN: biological_process unknown; LOCATED IN: plasma membrane; EXPRESSED IN: stem, flower; CONTAINS InterPro DOMAIN/s: Pirin, C-terminal (InterPro:IPR008778), Pirin (InterPro:IPR012093), Cupin, RmlC-type (InterPro:IPR011051), Pirin, N-terminal (InterPro:IPR003829); BEST Arabidopsis thaliana protein…	T
'30.6'	'signalling.MAP kinases'	'zm00001d031685'	'(q6l5d4|mpk9_orysa : 234.0) Mitogen-activated protein kinase 9 (EC 2.7.11.24) (MAP kinase 9) - Oryza sativa (Rice) & (at2g42880 : 157.0) member of MAP Kinase; MAP kinase 20 (MPK20); CONTAINS InterPro DOMAIN/s: Protein kinase, ATP binding site (InterPro:IPR017441), MAP kinase, conserved site (InterPro:IPR003527), Protein kinase, catalytic domain (InterPro:IPR000719), Serine/threonine-protein kina…	T
'30.6'	'signalling.MAP kinases'	'novel01201'	'(at3g13530 : 131.0) MAP3K epsilon protein kinase 1 is functionally redundant with MAP3Ke2. Required for pollen development but not essential. map3ke1;map3ke2 double-mutant pollen grains develop plasma membrane irregularities following pollen mitosis I. Localized primarily in the plasma membrane. Expressed in leaf trichomes, root columella cells and developing ovules.; mitogen-activated protein k…	T
'30.6'	'signalling.MAP kinases'	'novel00848'	'(at3g13530 : 118.0) MAP3K epsilon protein kinase 1 is functionally redundant with MAP3Ke2. Required for pollen development but not essential. map3ke1;map3ke2 double-mutant pollen grains develop plasma membrane irregularities following pollen mitosis I. Localized primarily in the plasma membrane. Expressed in leaf trichomes, root columella cells and developing ovules.; mitogen-activated protein k…	T
'31.1'	'cell.organisation'	'zm00001d051713'	'(at2g21380 : 82.8) Kinesin motor family protein; FUNCTIONS IN: microtubule motor activity, zinc ion binding, ATP binding; INVOLVED IN: microtubule-based movement; LOCATED IN: chloroplast; EXPRESSED IN: 23 plant structures; EXPRESSED DURING: 13 growth stages; CONTAINS InterPro DOMAIN/s: Kinesin, motor region, conserved site (InterPro:IPR019821), Zinc finger, RING-type (InterPro:IPR001841), Kinesi…	T
'31.1'	'cell.organisation'	'zm00001d042972'	'(at2g37080 : 152.0) ROP interactive partner 3 (RIP3); LOCATED IN: chloroplast; EXPRESSED IN: 21 plant structures; EXPRESSED DURING: 12 growth stages; BEST Arabidopsis thaliana protein match is: ROP interactive partner 4 (TAIR:AT3G53350.1); Has 147635 Blast hits to 77239 proteins in 3391 species: Archae - 1987; Bacteria - 30902; Metazoa - 62424; Fungi - 12574; Plants - 8109; Viruses - 683; Other …	T
'31.1'	'cell.organisation'	'zm00001d029390'	'(at2g28620 : 186.0) P-loop containing nucleoside triphosphate hydrolases superfamily protein; FUNCTIONS IN: microtubule motor activity, ATP binding; INVOLVED IN: microtubule-based movement; LOCATED IN: chloroplast; EXPRESSED IN: 18 plant structures; EXPRESSED DURING: 9 growth stages; CONTAINS InterPro DOMAIN/s: Kinesin, motor region, conserved site (InterPro:IPR019821), Kinesin, motor domain (In…	T
'31.1'	'cell.organisation'	'zm00001d028616'	'(at2g28840 : 447.0) XB3 ortholog 1 in Arabidopsis thaliana (XBAT31); FUNCTIONS IN: zinc ion binding; LOCATED IN: endomembrane system; EXPRESSED IN: 24 plant structures; EXPRESSED DURING: 15 growth stages; CONTAINS InterPro DOMAIN/s: Zinc finger, RING-type (InterPro:IPR001841), Ankyrin repeat-containing domain (InterPro:IPR020683), Ankyrin repeat (InterPro:IPR002110); BEST Arabidopsis thaliana pr…	T
'31.1'	'cell.organisation'	'zm00001d016557'	'(at3g01750 : 458.0) Ankyrin repeat family protein; CONTAINS InterPro DOMAIN/s: Ankyrin repeat-containing domain (InterPro:IPR020683), Ankyrin repeat (InterPro:IPR002110); BEST Arabidopsis thaliana protein match is: Ankyrin repeat family protein (TAIR:AT3G04140.1); Has 30372 Blast hits to 15038 proteins in 745 species: Archae - 53; Bacteria - 2422; Metazoa - 15116; Fungi - 2165; Plants - 2906; Vi…	T
'31.1'	'cell.organisation'	'zm00001d014271'	'(at3g50360 : 187.0) centrin2 (CEN2); FUNCTIONS IN: calcium ion binding; INVOLVED IN: biological_process unknown; LOCATED IN: plasma membrane; EXPRESSED IN: 24 plant structures; EXPRESSED DURING: 15 growth stages; CONTAINS InterPro DOMAIN/s: EF-Hand 1, calcium-binding site (InterPro:IPR018247), EF-HAND 2 (InterPro:IPR018249), EF-hand-like domain (InterPro:IPR011992), Calcium-binding EF-hand (Inte…	T
'31.1'	'cell.organisation'	'zm00001d007725'	'(at1g03670 : 129.0) ankyrin repeat family protein; CONTAINS InterPro DOMAIN/s: Ankyrin repeat-containing domain (InterPro:IPR020683), Ankyrin repeat (InterPro:IPR002110); BEST Arabidopsis thaliana protein match is: Ankyrin repeat family protein (TAIR:AT4G03500.1); Has 38664 Blast hits to 17395 proteins in 690 species: Archae - 39; Bacteria - 2692; Metazoa - 19825; Fungi - 3120; Plants - 3302; Vi…	T
'31.1.1.1.1'	'cell.organisation.cytoskeleton.actin.Actin'	'zm00001d032480'	'(p17298|act2_orysa : 750.0) Actin-2 - Oryza sativa (Rice) & (at5g09810 : 743.0) Member of Actin gene family.Mutants are defective in germination and root growth.; actin 7 (ACT7); FUNCTIONS IN: protein binding, structural constituent of cytoskeleton; INVOLVED IN: in 9 processes; LOCATED IN: mitochondrion, nucleolus, cell wall, cytoskeleton, plasma membrane; EXPRESSED IN: 29 plant structures; EXPR…	T
'31.1.1.1.1'	'cell.organisation.cytoskeleton.actin.Actin'	'zm00001d010159'	'(p02582|act1_maize : 742.0) Actin-1 - Zea mays (Maize) & (at5g09810 : 714.0) Member of Actin gene family.Mutants are defective in germination and root growth.; actin 7 (ACT7); FUNCTIONS IN: protein binding, structural constituent of cytoskeleton; INVOLVED IN: in 9 processes; LOCATED IN: mitochondrion, nucleolus, cell wall, cytoskeleton, plasma membrane; EXPRESSED IN: 29 plant structures; EXPRESS…	T
'31.1.1.1.2'	'cell.organisation.cytoskeleton.actin.actin depolymerizing factors'	'zm00001d035629'	'(q9fvi2|adf1_pethy : 231.0) Actin-depolymerizing factor 1 (ADF 1) - Petunia hybrida (Petunia) & (at5g59890 : 228.0) actin depolymerizing factor 4 (ADF4) mRNA, complete cds; actin depolymerizing factor 4 (ADF4); FUNCTIONS IN: actin binding; INVOLVED IN: defense response signaling pathway, resistance gene-dependent, defense response to bacterium; LOCATED IN: intracellular; EXPRESSED IN: 22 plant s…	T
'31.1.1.1.3'	'cell.organisation.cytoskeleton.actin.actin binding'	'zm00001d014376'	'(at4g30160 : 140.0) Arabidopsis thaliana VILLIN4; villin 4 (VLN4); FUNCTIONS IN: actin binding; INVOLVED IN: cytoskeleton organization; LOCATED IN: cellular_component unknown; EXPRESSED IN: 23 plant structures; EXPRESSED DURING: 13 growth stages; CONTAINS InterPro DOMAIN/s: Gelsolin (InterPro:IPR007122), Villin headpiece (InterPro:IPR003128), Gelsolin domain (InterPro:IPR007123); BEST Arabidopsi…	T
'31.1.1.3.11'	'cell.organisation.cytoskeleton.Myosin.Class XI'	'zm00001d013276'	'(at2g31900 : 2153.0) Encodes an novel myosin isoform.; myosin-like protein XIF (XIF); CONTAINS InterPro DOMAIN/s: Dil domain (InterPro:IPR018444), Dilute (InterPro:IPR002710), Myosin, N-terminal, SH3-like (InterPro:IPR004009), Myosin head, motor domain (InterPro:IPR001609), IQ calmodulin-binding region (InterPro:IPR000048); BEST Arabidopsis thaliana protein match is: Myosin family protein with D…	T
'31.1.1.3.11'	'cell.organisation.cytoskeleton.Myosin.Class XI'	'zm00001d003690'	'(at1g17580 : 91.3) Encodes a member of the type XI myosin protein family involved in organelle trafficking and overall plant development.; myosin 1 (MYA1); FUNCTIONS IN: motor activity; INVOLVED IN: in 8 processes; LOCATED IN: myosin complex; EXPRESSED IN: 23 plant structures; EXPRESSED DURING: 13 growth stages; CONTAINS InterPro DOMAIN/s: Dil domain (InterPro:IPR018444), Dilute (InterPro:IPR002…	T
'31.2'	'cell.division'	'zm00001d042880'	'(at3g55580 : 296.0) Regulator of chromosome condensation (RCC1) family protein; CONTAINS InterPro DOMAIN/s: Regulator of chromosome condensation/beta-lactamase-inhibitor protein II (InterPro:IPR009091), Regulator of chromosome condensation, RCC1 (InterPro:IPR000408); BEST Arabidopsis thaliana protein match is: Regulator of chromosome condensation (RCC1) family protein (TAIR:AT3G53830.1); Has 201…	T
'31.2'	'cell.division'	'zm00001d026669'	'(at2g36250 : 506.0) Encodes one of two FtsZ proteins, tubulin-like proteins, in Arabidopsis. It is involved in chloroplast division.; FTSZ2-1; FUNCTIONS IN: protein binding, structural molecule activity; INVOLVED IN: chloroplast fission; LOCATED IN: chloroplast stroma, chloroplast; EXPRESSED IN: 23 plant structures; EXPRESSED DURING: 13 growth stages; CONTAINS InterPro DOMAIN/s: Cell division pr…	T
'31.3'	'cell.cycle'	'zm00001d026360'	'(at3g21870 : 91.3) cyclin p2;1 (CYCP2;1); CONTAINS InterPro DOMAIN/s: Negative regulatory factor PREG (InterPro:IPR012389), Cyclin-like (InterPro:IPR011028), Cyclin-related 2 (InterPro:IPR013922), Cyclin (InterPro:IPR006670); BEST Arabidopsis thaliana protein match is: cyclin p4;1 (TAIR:AT2G44740.1); Has 1311 Blast hits to 1303 proteins in 220 species: Archae - 0; Bacteria - 18; Metazoa - 222; F…	T
'31.3.1'	'cell.cycle.peptidylprolyl isomerase'	'zm00001d050635'	'(p21569|cyph_maize : 304.0) Peptidyl-prolyl cis-trans isomerase (EC 5.2.1.8) (PPIase) (Rotamase) (Cyclophilin) (Cyclosporin A-binding protein) - Zea mays (Maize) & (at2g21130 : 268.0) Cyclophilin-like peptidyl-prolyl cis-trans isomerase family protein; FUNCTIONS IN: peptidyl-prolyl cis-trans isomerase activity; INVOLVED IN: protein folding; LOCATED IN: plasma membrane; EXPRESSED IN: 26 plant str…	T
'31.3.1'	'cell.cycle.peptidylprolyl isomerase'	'zm00001d030339'	'(q39613|cyph_catro : 204.0) Peptidyl-prolyl cis-trans isomerase (EC 5.2.1.8) (PPIase) (Rotamase) (Cyclophilin) (Cyclosporin A-binding protein) - Catharanthus roseus (Rosy periwinkle) (Madagascar periwinkle) & (at2g21130 : 193.0) Cyclophilin-like peptidyl-prolyl cis-trans isomerase family protein; FUNCTIONS IN: peptidyl-prolyl cis-trans isomerase activity; INVOLVED IN: protein folding; LOCATED IN…	T
'31.3.1'	'cell.cycle.peptidylprolyl isomerase'	'zm00001d016660'	'(p21569|cyph_maize : 321.0) Peptidyl-prolyl cis-trans isomerase (EC 5.2.1.8) (PPIase) (Rotamase) (Cyclophilin) (Cyclosporin A-binding protein) - Zea mays (Maize) & (at2g21130 : 266.0) Cyclophilin-like peptidyl-prolyl cis-trans isomerase family protein; FUNCTIONS IN: peptidyl-prolyl cis-trans isomerase activity; INVOLVED IN: protein folding; LOCATED IN: plasma membrane; EXPRESSED IN: 26 plant str…	T
'31.3.1'	'cell.cycle.peptidylprolyl isomerase'	'zm00001d008440'	'(at1g74070 : 218.0) Cyclophilin-like peptidyl-prolyl cis-trans isomerase family protein; FUNCTIONS IN: peptidyl-prolyl cis-trans isomerase activity; INVOLVED IN: protein folding; LOCATED IN: chloroplast thylakoid lumen, chloroplast; EXPRESSED IN: 20 plant structures; EXPRESSED DURING: 13 growth stages; CONTAINS InterPro DOMAIN/s: Cyclophilin-like (InterPro:IPR015891), Peptidyl-prolyl cis-trans i…	T
'31.3.1'	'cell.cycle.peptidylprolyl isomerase'	'zm00001d008209'	'(at3g62030 : 266.0) nuclear-encoded chloroplast stromal cyclophilin CYP20-3 (also known as ROC4). Protein is tyrosine-phosphorylated and its phosphorylation state is modulated in response to ABA in Arabidopsis thaliana seeds.; rotamase CYP 4 (ROC4); CONTAINS InterPro DOMAIN/s: Peptidyl-prolyl cis-trans isomerase, cyclophilin-type (InterPro:IPR002130), Cyclophilin-like (InterPro:IPR015891), Pepti…	T
'31.4'	'cell.vesicle transport'	'zm00001d050462'	'(at5g50380 : 112.0) A member of EXO70 gene family, putative exocyst subunits, conserved in land plants. Arabidopsis thaliana contains 23 putative EXO70 genes, which can be classified into eight clusters on the phylogenetic tree.; exocyst subunit exo70 family protein F1 (EXO70F1); INVOLVED IN: exocytosis, vesicle docking involved in exocytosis; LOCATED IN: plasma membrane, exocyst; EXPRESSED IN: …	T
'31.4'	'cell.vesicle transport'	'zm00001d034051'	'(at1g08190 : 434.0) Might be involved in protein sorting to the vacuole.; vacuolar protein sorting 41 (VPS41); FUNCTIONS IN: binding, nucleotide binding, zinc ion binding; INVOLVED IN: gravitropism, protein targeting to vacuole; EXPRESSED IN: 24 plant structures; EXPRESSED DURING: 15 growth stages; CONTAINS InterPro DOMAIN/s: WD40 repeat 2 (InterPro:IPR019782), Zinc finger, RING-type (InterPro:I…	T
'31.4'	'cell.vesicle transport'	'zm00001d026376'	'(at1g52360 : 80.5) Coatomer, beta' subunit; FUNCTIONS IN: structural molecule activity; INVOLVED IN: intracellular protein transport, vesicle-mediated transport; LOCATED IN: membrane coat, COPI vesicle coat; EXPRESSED IN: 24 plant structures; EXPRESSED DURING: 13 growth stages; CONTAINS InterPro DOMAIN/s: WD40 repeat 2 (InterPro:IPR019782), Coatomer, WD associated region (InterPro:IPR006692), Cy…	T
'31.4'	'cell.vesicle transport'	'zm00001d021664'	'(at5g08080 : 229.0) member of SYP13 Gene Family; syntaxin of plants 132 (SYP132); CONTAINS InterPro DOMAIN/s: Target SNARE coiled-coil domain (InterPro:IPR000727), t-SNARE (InterPro:IPR010989), Syntaxin/epimorphin, conserved site (InterPro:IPR006012), Syntaxin, N-terminal (InterPro:IPR006011); BEST Arabidopsis thaliana protein match is: syntaxin of plants 131 (TAIR:AT3G03800.1). & (reliability: …	T
'31.4'	'cell.vesicle transport'	'zm00001d016193'	'(at1g52360 : 176.0) Coatomer, beta' subunit; FUNCTIONS IN: structural molecule activity; INVOLVED IN: intracellular protein transport, vesicle-mediated transport; LOCATED IN: membrane coat, COPI vesicle coat; EXPRESSED IN: 24 plant structures; EXPRESSED DURING: 13 growth stages; CONTAINS InterPro DOMAIN/s: WD40 repeat 2 (InterPro:IPR019782), Coatomer, WD associated region (InterPro:IPR006692), C…	T
'31.4'	'cell.vesicle transport'	'zm00001d016183'	'(at1g30630 : 208.0) Coatomer epsilon subunit; FUNCTIONS IN: protein transporter activity, structural molecule activity, binding; INVOLVED IN: retrograde vesicle-mediated transport, Golgi to ER; LOCATED IN: plasma membrane; EXPRESSED IN: 24 plant structures; EXPRESSED DURING: 13 growth stages; CONTAINS InterPro DOMAIN/s: Tetratricopeptide-like helical (InterPro:IPR011990), Coatomer, epsilon subun…	T
'31.4'	'cell.vesicle transport'	'zm00001d013114'	'(at3g11820 : 189.0) Encodes a syntaxin localized at the plasma membrane (SYR1, Syntaxin Related Protein 1, also known as SYP121, PENETRATION1/PEN1). SYR1/PEN1 is a member of the SNARE superfamily proteins. SNARE proteins are involved in cell signaling, vesicle traffic, growth and development. SYR1/PEN1 functions in positioning anchoring of the KAT1 K+ channel protein at the plasma membrane. Tran…	T
'31.4'	'cell.vesicle transport'	'zm00001d012897'	'(at3g08530 : 496.0) Clathrin, heavy chain; FUNCTIONS IN: structural molecule activity, binding; INVOLVED IN: intracellular protein transport, vesicle-mediated transport; LOCATED IN: plasma membrane, chloroplast, membrane; EXPRESSED IN: guard cell, leaf; EXPRESSED DURING: seedling growth; CONTAINS InterPro DOMAIN/s: Clathrin, heavy chain (InterPro:IPR016341), Clathrin, heavy chain, linker/propell…	T
'33.1'	'development.storage proteins'	'zm00001d031813'	'(at2g26560 : 440.0) Encodes a lipid acyl hydrolase with wide substrate specificity that accumulates upon infection by fungal and bacterial pathogens. Protein is localized in the cytoplasm in healthy leaves, and in membranes in infected cells. Plays a role in cell death and differentially affects the accumulation of oxylipins. Contributes to resistance to virus.; phospholipase A 2A (PLA2A); FUNCT…	T
'33.99'	'development.unspecified'	'zm00001d052564'	'(at3g44350 : 152.0) NAC domain containing protein 61 (NAC061); CONTAINS InterPro DOMAIN/s: No apical meristem (NAM) protein (InterPro:IPR003441); BEST Arabidopsis thaliana protein match is: NAC domain containing protein 90 (TAIR:AT5G22380.1); Has 30201 Blast hits to 17322 proteins in 780 species: Archae - 12; Bacteria - 1396; Metazoa - 17338; Fungi - 3422; Plants - 5037; Viruses - 0; Other Eukar…	T
'33.99'	'development.unspecified'	'zm00001d051800'	'(at1g70670 : 136.0) Caleosin-related family protein; CONTAINS InterPro DOMAIN/s: Caleosin related (InterPro:IPR007736); BEST Arabidopsis thaliana protein match is: Caleosin-related family protein (TAIR:AT1G70680.1); Has 341 Blast hits to 336 proteins in 61 species: Archae - 0; Bacteria - 0; Metazoa - 0; Fungi - 60; Plants - 278; Viruses - 0; Other Eukaryotes - 3 (source: NCBI BLink). & (reliabil…	T
'33.99'	'development.unspecified'	'zm00001d048527'	'(at5g60690 : 1130.0) REVOLUTA regulates meristem initiation at lateral positions. a member of a small homeodomain-leucine zipper family. Has overlapping functions with PHAVOLUTA and PHABULOSA.; REVOLUTA (REV); CONTAINS InterPro DOMAIN/s: Homeobox (InterPro:IPR001356), Homeodomain-like (InterPro:IPR009057), Lipid-binding START (InterPro:IPR002913), MEKHLA (InterPro:IPR013978), Homeodomain-related…	T
'33.99'	'development.unspecified'	'zm00001d047837'	'(at2g39830 : 444.0) DA1-related protein 2 (DAR2); FUNCTIONS IN: zinc ion binding; LOCATED IN: chloroplast; EXPRESSED IN: 23 plant structures; EXPRESSED DURING: 13 growth stages; CONTAINS InterPro DOMAIN/s: Zinc finger, LIM-type (InterPro:IPR001781), Protein of unknown function DUF3633 (InterPro:IPR022087); BEST Arabidopsis thaliana protein match is: LIM domain-containing protein (TAIR:AT4G36860.…	T
'33.99'	'development.unspecified'	'zm00001d045572'	'(at1g09380 : 145.0) nodulin MtN21 /EamA-like transporter family protein; LOCATED IN: endomembrane system, membrane; EXPRESSED IN: 15 plant structures; EXPRESSED DURING: 4 anthesis, C globular stage, petal differentiation and expansion stage, LP.08 eight leaves visible; CONTAINS InterPro DOMAIN/s: Protein of unknown function DUF6, transmembrane (InterPro:IPR000620); BEST Arabidopsis thaliana prot…	T
'33.99'	'development.unspecified'	'zm00001d045567'	'(at4g01440 : 232.0) nodulin MtN21 /EamA-like transporter family protein; LOCATED IN: endomembrane system, membrane; EXPRESSED IN: 21 plant structures; EXPRESSED DURING: 13 growth stages; CONTAINS InterPro DOMAIN/s: Protein of unknown function DUF6, transmembrane (InterPro:IPR000620); BEST Arabidopsis thaliana protein match is: nodulin MtN21 /EamA-like transporter family protein (TAIR:AT4G01450.2…	T
'33.99'	'development.unspecified'	'zm00001d042750'	'(at2g35460 : 94.4) Late embryogenesis abundant (LEA) hydroxyproline-rich glycoprotein family; CONTAINS InterPro DOMAIN/s: Late embryogenesis abundant protein, group 2 (InterPro:IPR004864); BEST Arabidopsis thaliana protein match is: NDR1/HIN1-like 2 (TAIR:AT3G11650.1); Has 974 Blast hits to 974 proteins in 28 species: Archae - 0; Bacteria - 0; Metazoa - 0; Fungi - 0; Plants - 974; Viruses - 0; O…	T
'33.99'	'development.unspecified'	'zm00001d042749'	'(at2g35980 : 107.0) Encodes a protein whose sequence is similar to tobacco hairpin-induced gene (HIN1) and Arabidopsis non-race specific disease resistance gene (NDR1). Expression of this gene is induced by cucumber mosaic virus, spermine and during senescence. The gene product is localized to the chloroplast.; YELLOW-LEAF-SPECIFIC GENE 9 (YLS9); FUNCTIONS IN: molecular_function unknown; INVOLVE…	T
'33.99'	'development.unspecified'	'zm00001d041886'	'(at4g28530 : 162.0) NAC domain containing protein 74 (NAC074); FUNCTIONS IN: sequence-specific DNA binding transcription factor activity; INVOLVED IN: multicellular organismal development, regulation of transcription; LOCATED IN: cellular_component unknown; EXPRESSED IN: 18 plant structures; EXPRESSED DURING: 13 growth stages; CONTAINS InterPro DOMAIN/s: No apical meristem (NAM) protein (InterPr…	T
'33.99'	'development.unspecified'	'zm00001d041067'	'(at5g23660 : 262.0) homolog of the Medicago nodulin MTN3; homolog of Medicago truncatula MTN3 (MTN3); INVOLVED IN: biological_process unknown; LOCATED IN: endomembrane system, integral to membrane, membrane; EXPRESSED IN: 19 plant structures; EXPRESSED DURING: 12 growth stages; CONTAINS InterPro DOMAIN/s: MtN3/saliva-related transmembrane protein, conserved region (InterPro:IPR018169), RAG1-acti…	T
'33.99'	'development.unspecified'	'zm00001d039506'	'(at4g29230 : 380.0) NAC domain containing protein 75 (NAC075); FUNCTIONS IN: sequence-specific DNA binding transcription factor activity; INVOLVED IN: multicellular organismal development, regulation of transcription; EXPRESSED IN: inflorescence meristem, flower; EXPRESSED DURING: petal differentiation and expansion stage; CONTAINS InterPro DOMAIN/s: No apical meristem (NAM) protein (InterPro:IP…	T
'33.99'	'development.unspecified'	'zm00001d036364'	'(at2g17040 : 227.0) Member of the NAC transcription factor family and more specifically, the ONAC022 subfamily. Involved in leaf and inflorescence stem morphogenesis.; NAC domain containing protein 36 (NAC036); CONTAINS InterPro DOMAIN/s: No apical meristem (NAM) protein (InterPro:IPR003441); BEST Arabidopsis thaliana protein match is: NAC domain containing protein 35 (TAIR:AT2G02450.2); Has 286…	T
'33.99'	'development.unspecified'	'zm00001d034208'	'(at3g56640 : 323.0) Encodes a member of the exocyst complex gene family. The exocyst is a protein complex involved in tethering vesicles to the plasma membrane during regulated or polarized secretion.; exocyst complex component sec15A (SEC15A); CONTAINS InterPro DOMAIN/s: Exocyst complex subunit Sec15-like (InterPro:IPR007225); BEST Arabidopsis thaliana protein match is: exocyst complex componen…	T
'33.99'	'development.unspecified'	'zm00001d032144'	'(at1g79700 : 239.0) Integrase-type DNA-binding superfamily protein; CONTAINS InterPro DOMAIN/s: DNA-binding, integrase-type (InterPro:IPR016177), Pathogenesis-related transcriptional factor/ERF, DNA-binding (InterPro:IPR001471); BEST Arabidopsis thaliana protein match is: ARIA-interacting double AP2 domain protein (TAIR:AT1G16060.1); Has 7501 Blast hits to 5104 proteins in 263 species: Archae - …	T
'33.99'	'development.unspecified'	'zm00001d028603'	'(at2g37650 : 521.0) GRAS family transcription factor; CONTAINS InterPro DOMAIN/s: Transcription factor GRAS (InterPro:IPR005202); BEST Arabidopsis thaliana protein match is: SCARECROW-like 14 (TAIR:AT1G07530.1); Has 2417 Blast hits to 2350 proteins in 288 species: Archae - 0; Bacteria - 4; Metazoa - 2; Fungi - 0; Plants - 2410; Viruses - 0; Other Eukaryotes - 1 (source: NCBI BLink). & (q8gve1|ci…	T
'33.99'	'development.unspecified'	'zm00001d028252'	'(at2g33380 : 130.0) Encodes a calcium binding protein whose mRNA is induced upon treatment with NaCl, ABA and in response to dessication. mRNA expression under drought conditions is apparent particularly in leaves and flowers. Isoform of caleosin with a role as a peroxygenase involved in oxylipin metabolism during biotic and abiotic stress.; RESPONSIVE TO DESSICATION 20 (RD20); FUNCTIONS IN: lip…	T
'33.99'	'development.unspecified'	'zm00001d027530'	'(at2g17040 : 244.0) Member of the NAC transcription factor family and more specifically, the ONAC022 subfamily. Involved in leaf and inflorescence stem morphogenesis.; NAC domain containing protein 36 (NAC036); CONTAINS InterPro DOMAIN/s: No apical meristem (NAM) protein (InterPro:IPR003441); BEST Arabidopsis thaliana protein match is: NAC domain containing protein 35 (TAIR:AT2G02450.2); Has 286…	T
'33.99'	'development.unspecified'	'zm00001d026300'	'(at1g31280 : 584.0) An Argonaute gene; argonaute 2 (AGO2); FUNCTIONS IN: nucleic acid binding; INVOLVED IN: biological_process unknown; LOCATED IN: cellular_component unknown; EXPRESSED IN: 21 plant structures; EXPRESSED DURING: 12 growth stages; CONTAINS InterPro DOMAIN/s: Domain of unknown function DUF1785 (InterPro:IPR014811), Stem cell self-renewal protein Piwi (InterPro:IPR003165), Argonaut…	T
'33.99'	'development.unspecified'	'zm00001d025980'	'(at5g63420 : 285.0) embryo defective 2746 (emb2746); FUNCTIONS IN: hydrolase activity, DNA binding, catalytic activity; INVOLVED IN: metabolic process, embryo development ending in seed dormancy; LOCATED IN: chloroplast; EXPRESSED IN: 22 plant structures; EXPRESSED DURING: 13 growth stages; CONTAINS InterPro DOMAIN/s: SANT, DNA-binding (InterPro:IPR001005), RNA-metabolising metallo-beta-lactamas…	T
'33.99'	'development.unspecified'	'zm00001d023673'	'(at3g48740 : 258.0) Nodulin MtN3 family protein; INVOLVED IN: biological_process unknown; LOCATED IN: endomembrane system, integral to membrane, membrane; EXPRESSED IN: 22 plant structures; EXPRESSED DURING: 13 growth stages; CONTAINS InterPro DOMAIN/s: MtN3/saliva-related transmembrane protein, conserved region (InterPro:IPR018169), RAG1-activating protein 1 homologue (InterPro:IPR018179), RAG1…	T
'33.99'	'development.unspecified'	'zm00001d018984'	'(at4g27990 : 96.3) YLMG1-2; FUNCTIONS IN: molecular_function unknown; INVOLVED IN: biological_process unknown; LOCATED IN: chloroplast, chloroplast envelope; EXPRESSED IN: 23 plant structures; EXPRESSED DURING: 13 growth stages; CONTAINS InterPro DOMAIN/s: Protein of unknown function YGGT (InterPro:IPR003425); BEST Arabidopsis thaliana protein match is: YGGT family protein (TAIR:AT3G07430.1); Ha…	T
'33.99'	'development.unspecified'	'zm00001d014628'	'(at4g37790 : 144.0) Encodes homeobox protein HAT22, member of the HD-Zip II family.; HAT22; FUNCTIONS IN: sequence-specific DNA binding transcription factor activity; INVOLVED IN: regulation of transcription, DNA-dependent, response to cytokinin stimulus; LOCATED IN: nucleus; EXPRESSED IN: 22 plant structures; EXPRESSED DURING: 13 growth stages; CONTAINS InterPro DOMAIN/s: Homeobox, conserved si…	T
'33.99'	'development.unspecified'	'zm00001d014580'	'(at5g43810 : 126.0) Encodes a member of the EIF2C (elongation initiation factor 2c)/ Argonaute class of proteins. Required to establish the central-peripheral organization of the embryo apex. Along with WUS and CLV genes, controls the relative organization of central zone and peripheral zone cells in meristems. Acts in embryonic provascular tissue potentiating WUSCHEL function during meristem de…	T
'33.99'	'development.unspecified'	'zm00001d013595'	'(at3g63210 : 94.7) encodes a novel zinc-finger protein with a proline-rich N-terminus, identical to senescence-associated protein SAG102; Protein of unknown function (DUF581); CONTAINS InterPro DOMAIN/s: Protein of unknown function DUF581 (InterPro:IPR007650); BEST Arabidopsis thaliana protein match is: Protein of unknown function (DUF581) (TAIR:AT3G22550.1); Has 30201 Blast hits to 17322 protei…	T
'33.99'	'development.unspecified'	'zm00001d013151'	'(at2g43000 : 248.0) NAC domain containing protein 42 (NAC042); FUNCTIONS IN: sequence-specific DNA binding transcription factor activity; INVOLVED IN: multicellular organismal development, regulation of transcription; LOCATED IN: cellular_component unknown; EXPRESSED IN: 9 plant structures; EXPRESSED DURING: 6 growth stages; CONTAINS InterPro DOMAIN/s: No apical meristem (NAM) protein (InterPro:…	T
'33.99'	'development.unspecified'	'zm00001d011069'	'(at2g37650 : 455.0) GRAS family transcription factor; CONTAINS InterPro DOMAIN/s: Transcription factor GRAS (InterPro:IPR005202); BEST Arabidopsis thaliana protein match is: SCARECROW-like 14 (TAIR:AT1G07530.1); Has 2417 Blast hits to 2350 proteins in 288 species: Archae - 0; Bacteria - 4; Metazoa - 2; Fungi - 0; Plants - 2410; Viruses - 0; Other Eukaryotes - 1 (source: NCBI BLink). & (q8gve1|ci…	T
'33.99'	'development.unspecified'	'zm00001d010440'	'(at5g53190 : 166.0) Nodulin MtN3 family protein; INVOLVED IN: biological_process unknown; LOCATED IN: integral to membrane, membrane; EXPRESSED IN: 8 plant structures; EXPRESSED DURING: 4 anthesis, C globular stage, petal differentiation and expansion stage, E expanded cotyledon stage; CONTAINS InterPro DOMAIN/s: MtN3/saliva-related transmembrane protein, conserved region (InterPro:IPR018169), R…	T
'33.99'	'development.unspecified'	'zm00001d009084'	'(at2g41380 : 277.0) S-adenosyl-L-methionine-dependent methyltransferases superfamily protein; FUNCTIONS IN: methyltransferase activity; INVOLVED IN: response to cadmium ion; LOCATED IN: mitochondrion; EXPRESSED IN: 12 plant structures; EXPRESSED DURING: LP.04 four leaves visible, 4 anthesis, petal differentiation and expansion stage; CONTAINS InterPro DOMAIN/s: Methyltransferase type 11 (InterPr…	T
'33.99'	'development.unspecified'	'zm00001d008817'	'(at4g29230 : 351.0) NAC domain containing protein 75 (NAC075); FUNCTIONS IN: sequence-specific DNA binding transcription factor activity; INVOLVED IN: multicellular organismal development, regulation of transcription; EXPRESSED IN: inflorescence meristem, flower; EXPRESSED DURING: petal differentiation and expansion stage; CONTAINS InterPro DOMAIN/s: No apical meristem (NAM) protein (InterPro:IP…	T
'34.12'	'transport.metal'	'zm00001d033446'	'(at1g31260 : 331.0) member of Fe(II) transporter isolog family; zinc transporter 10 precursor (ZIP10); FUNCTIONS IN: cation transmembrane transporter activity, metal ion transmembrane transporter activity; INVOLVED IN: cation transport; LOCATED IN: endomembrane system, integral to membrane, membrane; CONTAINS InterPro DOMAIN/s: Zinc/iron permease, fungal/plant (InterPro:IPR004698), Zinc/iron per…	T
'34.12'	'transport.metal'	'zm00001d021461'	'(at2g13620 : 181.0) member of Putative Na+/H+ antiporter family; cation/hydrogen exchanger 15 (CHX15); FUNCTIONS IN: monovalent cation:hydrogen antiporter activity, sodium:hydrogen antiporter activity; INVOLVED IN: cation transport; LOCATED IN: integral to membrane; EXPRESSED IN: male gametophyte, flower, pollen tube; EXPRESSED DURING: L mature pollen stage, M germinated pollen stage, 4 anthesis…	T
'34.12'	'transport.metal'	'zm00001d020395'	'(at2g01770 : 270.0) Encodes an iron transporter required for iron sequestration into vacuoles. Expressed in developing embryo and seed. Localized in the vacuolar membrane.; vacuolar iron transporter 1 (VIT1); CONTAINS InterPro DOMAIN/s: Protein of unknown function DUF125, transmembrane (InterPro:IPR008217); Has 1947 Blast hits to 1945 proteins in 688 species: Archae - 106; Bacteria - 1196; Metaz…	T
'34.13'	'transport.peptides and oligopeptides'	'zm00001d043374'	'(at1g52190 : 432.0) Major facilitator superfamily protein; FUNCTIONS IN: transporter activity; INVOLVED IN: oligopeptide transport; LOCATED IN: membrane; EXPRESSED IN: 22 plant structures; EXPRESSED DURING: 13 growth stages; CONTAINS InterPro DOMAIN/s: Oligopeptide transporter (InterPro:IPR000109), Major facilitator superfamily, general substrate transporter (InterPro:IPR016196); BEST Arabidopsi…	T
'34.13'	'transport.peptides and oligopeptides'	'zm00001d042684'	'(at1g22540 : 436.0) Major facilitator superfamily protein; FUNCTIONS IN: transporter activity; INVOLVED IN: oligopeptide transport; LOCATED IN: membrane; EXPRESSED IN: 22 plant structures; EXPRESSED DURING: 13 growth stages; CONTAINS InterPro DOMAIN/s: PTR2 family proton/oligopeptide symporter, conserved site (InterPro:IPR018456), Oligopeptide transporter (InterPro:IPR000109), Major facilitator …	T
'34.13'	'transport.peptides and oligopeptides'	'zm00001d017713'	'(at2g02040 : 463.0) Encodes a di- and tri-peptide transporter that recognizes a variety of different amino acid combinations. Expression of the transcripts for this gene can be detected in the embryo through in situ hybridization. This protein does not have nitrate transporter activity based on oocyte transport assays.; peptide transporter 2 (PTR2); FUNCTIONS IN: dipeptide transporter activity, …	T
'34.13'	'transport.peptides and oligopeptides'	'zm00001d013529'	'(at5g62680 : 582.0) Major facilitator superfamily protein; FUNCTIONS IN: transporter activity; INVOLVED IN: oligopeptide transport, response to karrikin; LOCATED IN: plasma membrane, membrane; EXPRESSED IN: 23 plant structures; EXPRESSED DURING: 13 growth stages; CONTAINS InterPro DOMAIN/s: Oligopeptide transporter (InterPro:IPR000109), Major facilitator superfamily, general substrate transporte…	T
'34.13'	'transport.peptides and oligopeptides'	'zm00001d012953'	'(at2g37900 : 583.0) Major facilitator superfamily protein; FUNCTIONS IN: transporter activity; INVOLVED IN: oligopeptide transport; LOCATED IN: membrane; EXPRESSED IN: 15 plant structures; EXPRESSED DURING: 7 growth stages; CONTAINS InterPro DOMAIN/s: PTR2 family proton/oligopeptide symporter, conserved site (InterPro:IPR018456), Oligopeptide transporter (InterPro:IPR000109), Major facilitator s…	T
'34.14'	'transport.unspecified cations'	'zm00001d040627'	'(q3yaf4|hkt8_orysa : 530.0) Cation transporter HKT8 (OsHKT8) - Oryza sativa (Rice) & (at4g10310 : 307.0) encodes a sodium transporter (HKT1) expressed in xylem parenchyma cells. Mutants over-accumulate sodium in shoot tissue and have increased sodium in the xylem sap and reduced sodium in phloem sap and roots.; high-affinity K+ transporter 1 (HKT1); CONTAINS InterPro DOMAIN/s: Potassium transpor…	T
'34.15'	'transport.potassium'	'zm00001d053446'	'(at4g18290 : 687.0) Encodes KAT2, a member of the Shaker family potassium ion (K+) channel. Critical to stomatal opening induced by blue light. Critical to circadian rhythm of stomatal opening. Involved in plant development in response to high light intensity. Under high light intensity, the mutant plant produced less biomass compared to the wild type. The Shaker family K+ ion channels include f…	T
'34.15'	'transport.potassium'	'zm00001d041308'	'(at4g04850 : 682.0) member of Putative potassium transporter family; K+ efflux antiporter 3 (KEA3); FUNCTIONS IN: potassium:hydrogen antiporter activity, potassium ion transmembrane transporter activity; INVOLVED IN: potassium ion transport, cation transport, metabolic process, transmembrane transport; EXPRESSED IN: 21 plant structures; EXPRESSED DURING: 13 growth stages; CONTAINS InterPro DOMAI…	T
'34.15'	'transport.potassium'	'zm00001d033067'	'(q84ms3|hak16_orysa : 1171.0) Probable potassium transporter 16 (OsHAK16) - Oryza sativa (Rice) & (at4g13420 : 646.0) Encodes a protein of the KUP/HAK/KT potassium channel class that is upregulated in the roots by K levels.; high affinity K+ transporter 5 (HAK5); FUNCTIONS IN: potassium ion transmembrane transporter activity, potassium:sodium symporter activity; INVOLVED IN: potassium ion transp…	T
'34.16'	'transport.ABC transporters and multidrug resistance systems'	'zm00001d021647'	'(q8gu86|pdr5_orysa : 1149.0) Pleiotropic drug resistance protein 5 - Oryza sativa (Rice) & (at2g36380 : 858.0) pleiotropic drug resistance 6 (PDR6); FUNCTIONS IN: ATPase activity, coupled to transmembrane movement of substances; LOCATED IN: plasma membrane; EXPRESSED IN: 24 plant structures; EXPRESSED DURING: 13 growth stages; CONTAINS InterPro DOMAIN/s: ATPase, AAA+ type, core (InterPro:IPR0035…	T
'34.16'	'transport.ABC transporters and multidrug resistance systems'	'zm00001d020811'	'(at1g17840 : 633.0) Encodes a plasma membrane-localized ATP-binding cassette transporter, that is required for cutin transport to the extracellular matrix.; white-brown complex homolog protein 11 (WBC11); FUNCTIONS IN: ATPase activity, coupled to transmembrane movement of substances, fatty acid transporter activity; INVOLVED IN: cutin transport, fatty acid transport; LOCATED IN: plasma membrane,…	T
'34.16'	'transport.ABC transporters and multidrug resistance systems'	'zm00001d016794'	'(q6yuu5|mdr_orysa : 1702.0) Putative multidrug resistance protein (P-glycoprotein) - Oryza sativa (Rice) & (at3g28345 : 1424.0) ABC transporter family protein; FUNCTIONS IN: ATPase activity, coupled to transmembrane movement of substances; INVOLVED IN: transport, transmembrane transport; LOCATED IN: plasma membrane; EXPRESSED IN: shoot apex, inflorescence meristem, cotyledon, hypocotyl, flower; …	T
'34.16'	'transport.ABC transporters and multidrug resistance systems'	'zm00001d016396'	'(at5g61700 : 422.0) member of ATH subfamily; ABC2 homolog 16 (ATH16); CONTAINS InterPro DOMAIN/s: ATPase, AAA+ type, core (InterPro:IPR003593), ABC transporter-like (InterPro:IPR003439), ABC transporter, conserved site (InterPro:IPR017871); BEST Arabidopsis thaliana protein match is: ABC2 homolog 14 (TAIR:AT5G61740.1); Has 1807 Blast hits to 1807 proteins in 277 species: Archae - 0; Bacteria - 0…	T
'34.16'	'transport.ABC transporters and multidrug resistance systems'	'zm00001d011315'	'(q8gu90|pdr3_orysa : 2333.0) Pleiotropic drug resistance protein 3 - Oryza sativa (Rice) & (at1g15520 : 1831.0) ABC transporter family involved in ABA transport and resistance to lead. Localizes to plasma membrane. Upregulated by lead. Expressed in leaves, flowers, stomata and roots.; pleiotropic drug resistance 12 (PDR12); CONTAINS InterPro DOMAIN/s: ATPase, AAA+ type, core (InterPro:IPR003593)…	T
'34.16'	'transport.ABC transporters and multidrug resistance systems'	'zm00001d011006'	'(at3g55090 : 786.0) ABC-2 type transporter family protein; FUNCTIONS IN: ATPase activity, coupled to transmembrane movement of substances; INVOLVED IN: response to cyclopentenone; LOCATED IN: membrane; EXPRESSED IN: sepal, root, flower, carpel, stamen; EXPRESSED DURING: 4 anthesis, petal differentiation and expansion stage; CONTAINS InterPro DOMAIN/s: ATPase, AAA+ type, core (InterPro:IPR003593)…	T
'34.19.1'	'transport.Major Intrinsic Proteins.PIP'	'zm00001d051174'	'(q6k215|pip22_orysa : 542.0) Probable aquaporin PIP2.2 (Plasma membrane intrinsic protein 2.2) (OsPIP2.2) - Oryza sativa (Rice) & (at2g37170 : 475.0) a member of the plasma membrane intrinsic protein subfamily PIP2. localizes to the plasma membrane and exhibits water transport activity in Xenopus oocyte. expressed specifically in the vascular bundles and protein level increases slightly during l…	T
'34.19.2'	'transport.Major Intrinsic Proteins.TIP'	'zm00001d051362'	'(q7xa61|tip21_orysa : 401.0) Probable aquaporin TIP2.1 (Tonoplast intrinsic protein 2.1) (OsTIP2.1) - Oryza sativa (Rice) & (at5g47450 : 329.0) Tonoplast intrinsic protein, transports ammonium (NH3) and methylammonium across the tonoplast membrane, gene expression shows diurnal regulation and is upregulated by ammonium (NH3).; tonoplast intrinsic protein 2;3 (TIP2;3); CONTAINS InterPro DOMAIN/s:…	T
'34.19.2'	'transport.Major Intrinsic Proteins.TIP'	'zm00001d039713'	'(q9lwr0|tip42_orysa : 287.0) Probable aquaporin TIP4.2 (Tonoplast intrinsic protein 4.2) (OsTIP4.2) - Oryza sativa (Rice) & (at2g25810 : 228.0) tonoplast intrinsic protein 4;1 (TIP4;1); FUNCTIONS IN: water channel activity; INVOLVED IN: transport, transmembrane transport; LOCATED IN: plant-type vacuole membrane, membrane, central vacuole; EXPRESSED IN: 14 plant structures; EXPRESSED DURING: 4 an…	T
'34.19.3'	'transport.Major Intrinsic Proteins.NIP'	'zm00001d052261'	'(q6z2t3|lsi1_orysa : 344.0) Silicon transporter LSI1 (Low silicon protein 1) - Oryza sativa (Rice) & (at4g10380 : 155.0) Boric acid channel. Essential for efficient boron uptake and plant development under boron limitation. Also functions in arsenite transport and tolerance. Localized preferentially in outer membrane domains of root cells.; NOD26-like intrinsic protein 5;1 (NIP5;1); CONTAINS Int…	T
'34.19.99'	'transport.Major Intrinsic Proteins.unspecified'	'zm00001d052261'	'(q6z2t3|lsi1_orysa : 344.0) Silicon transporter LSI1 (Low silicon protein 1) - Oryza sativa (Rice) & (at4g10380 : 155.0) Boric acid channel. Essential for efficient boron uptake and plant development under boron limitation. Also functions in arsenite transport and tolerance. Localized preferentially in outer membrane domains of root cells.; NOD26-like intrinsic protein 5;1 (NIP5;1); CONTAINS Int…	T
'34.2'	'transport.sugars'	'zm00001d025894'	'(at2g22730 : 290.0) Major facilitator superfamily protein; FUNCTIONS IN: carbohydrate transmembrane transporter activity, sugar:hydrogen symporter activity; INVOLVED IN: transmembrane transport; LOCATED IN: membrane; CONTAINS InterPro DOMAIN/s: Major facilitator superfamily (InterPro:IPR020846), Major facilitator superfamily MFS-1 (InterPro:IPR011701), Major facilitator superfamily, general subs…	T
'34.2'	'transport.sugars'	'zm00001d021938'	'(at3g18830 : 578.0) This gene encodes a plasma membrane-localized polyol/cyclitol/monosaccharide-H+-symporter. The symporter is able to catalyze the energy-dependent membrane passage of a wide range of linear polyols (three to six carbon backbone), of cyclic polyols (<i>myo</i>-inositol), and of numerous monosaccharides, including pyranose ring-forming and furanose ring-forming hexoses and pento…	T
'34.2'	'transport.sugars'	'zm00001d006697'	'(at3g18830 : 567.0) This gene encodes a plasma membrane-localized polyol/cyclitol/monosaccharide-H+-symporter. The symporter is able to catalyze the energy-dependent membrane passage of a wide range of linear polyols (three to six carbon backbone), of cyclic polyols (<i>myo</i>-inositol), and of numerous monosaccharides, including pyranose ring-forming and furanose ring-forming hexoses and pento…	T
'34.23.1'	'transport.hormones.auxin'	'zm00001d053563'	'(at5g56750 : 181.0) N-MYC downregulated-like 1 (NDL1); CONTAINS InterPro DOMAIN/s: Pollen specific protein SF21 (InterPro:IPR015511), Ndr (InterPro:IPR004142); BEST Arabidopsis thaliana protein match is: N-MYC downregulated-like 3 (TAIR:AT2G19620.1); Has 776 Blast hits to 775 proteins in 111 species: Archae - 2; Bacteria - 48; Metazoa - 563; Fungi - 0; Plants - 132; Viruses - 0; Other Eukaryotes…	T
'34.23.1'	'transport.hormones.auxin'	'zm00001d016308'	'(at5g56750 : 486.0) N-MYC downregulated-like 1 (NDL1); CONTAINS InterPro DOMAIN/s: Pollen specific protein SF21 (InterPro:IPR015511), Ndr (InterPro:IPR004142); BEST Arabidopsis thaliana protein match is: N-MYC downregulated-like 3 (TAIR:AT2G19620.1); Has 776 Blast hits to 775 proteins in 111 species: Archae - 2; Bacteria - 48; Metazoa - 563; Fungi - 0; Plants - 132; Viruses - 0; Other Eukaryotes…	T
'34.3'	'transport.amino acids'	'zm00001d049640'	'(at5g40780 : 623.0) Encodes LHT1 (lysine histidine transporter), a high-affinity transporter for cellular amino acid uptake in both root epidermis and leaf mesophyll.; lysine histidine transporter 1; FUNCTIONS IN: amino acid transmembrane transporter activity; INVOLVED IN: amino acid transport, response to karrikin, amino acid import; LOCATED IN: plasma membrane, membrane; EXPRESSED IN: 22 plant…	T
'34.3'	'transport.amino acids'	'zm00001d037057'	'(at2g39130 : 460.0) Transmembrane amino acid transporter family protein; FUNCTIONS IN: amino acid transmembrane transporter activity; INVOLVED IN: biological_process unknown; LOCATED IN: plasma membrane; EXPRESSED IN: 24 plant structures; EXPRESSED DURING: 15 growth stages; CONTAINS InterPro DOMAIN/s: Amino acid transporter, transmembrane (InterPro:IPR013057); BEST Arabidopsis thaliana protein m…	T
'34.3'	'transport.amino acids'	'zm00001d033493'	'(at1g58030 : 342.0) Encodes a member of the cationic amino acid transporter (CAT) subfamily of amino acid polyamine choline transporters. Localized to the tonoplast.; cationic amino acid transporter 2 (CAT2); FUNCTIONS IN: amino acid transmembrane transporter activity; INVOLVED IN: amino acid transport, transport, transmembrane transport; LOCATED IN: plant-type vacuole membrane, plasma membrane,…	T
'34.3'	'transport.amino acids'	'zm00001d023592'	'(at1g77380 : 636.0) Amino acid permease which transports basic amino acids.; amino acid permease 3 (AAP3); CONTAINS InterPro DOMAIN/s: Amino acid transporter, transmembrane (InterPro:IPR013057); BEST Arabidopsis thaliana protein match is: amino acid permease 2 (TAIR:AT5G09220.1); Has 2346 Blast hits to 2332 proteins in 227 species: Archae - 0; Bacteria - 15; Metazoa - 394; Fungi - 322; Plants - …	T
'34.3'	'transport.amino acids'	'zm00001d019225'	'(at3g11900 : 355.0) encodes an amino acid transporter that transports aromatic and neutral amino acids, IAA, and 2,4-D. Expressed in all tissues with highest abundance in flowers and cauline leaves. a member of a small gene family in Arabidopsis and represents a new class of amino acid transporters.; aromatic and neutral transporter 1 (ANT1); CONTAINS InterPro DOMAIN/s: Amino acid transporter, t…	T
'34.3'	'transport.amino acids'	'zm00001d017713'	'(at2g02040 : 463.0) Encodes a di- and tri-peptide transporter that recognizes a variety of different amino acid combinations. Expression of the transcripts for this gene can be detected in the embryo through in situ hybridization. This protein does not have nitrate transporter activity based on oocyte transport assays.; peptide transporter 2 (PTR2); FUNCTIONS IN: dipeptide transporter activity, …	T
'34.3'	'transport.amino acids'	'zm00001d013652'	'(at1g58030 : 531.0) Encodes a member of the cationic amino acid transporter (CAT) subfamily of amino acid polyamine choline transporters. Localized to the tonoplast.; cationic amino acid transporter 2 (CAT2); FUNCTIONS IN: amino acid transmembrane transporter activity; INVOLVED IN: amino acid transport, transport, transmembrane transport; LOCATED IN: plant-type vacuole membrane, plasma membrane,…	T
'34.3'	'transport.amino acids'	'zm00001d010231'	'(at1g77380 : 649.0) Amino acid permease which transports basic amino acids.; amino acid permease 3 (AAP3); CONTAINS InterPro DOMAIN/s: Amino acid transporter, transmembrane (InterPro:IPR013057); BEST Arabidopsis thaliana protein match is: amino acid permease 2 (TAIR:AT5G09220.1); Has 2346 Blast hits to 2332 proteins in 227 species: Archae - 0; Bacteria - 15; Metazoa - 394; Fungi - 322; Plants - …	T
'34.30'	'transport.H+ transporting pyrophosphatase'	'zm00001d037492'	'(q06572|avp_horvu : 1372.0) Pyrophosphate-energized vacuolar membrane proton pump (EC 3.6.1.1) (Pyrophosphate-energized inorganic pyrophosphatase) (H(+)-PPase) - Hordeum vulgare (Barley) & (at1g15690 : 1301.0) Encodes a H(+)-translocating (pyrophosphate-energized) inorganic pyrophosphatase (H(+)-PPase; EC 3.6.1.1) located in the vacuolar membrane. Expression is found in all tissues examined, inc…	T
'34.5'	'transport.ammonium'	'zm00001d017249'	'(at1g64780 : 606.0) encodes an ammonium transporter protein believed to act as a high affinity transporter. It is expressed in the root, primarily in endodermal and cortical cells, and contributes to ammonium uptake in the root.; ammonium transporter 1;2 (AMT1;2); CONTAINS InterPro DOMAIN/s: Ammonium transporter (InterPro:IPR001905), Ammonium transporter, conserved site (InterPro:IPR018047); BES…	T
'34.6'	'transport.sulphate'	'zm00001d028164'	'(at5g10180 : 733.0) Encodes a low-affinity sulfate transporter expressed in the root cap and central cylinder, where it is induced by sulfur starvation. Expression in the shoot vascular system is not induced by sulfur starvation.; slufate transporter 2;1 (SULTR2;1); FUNCTIONS IN: sulfate transmembrane transporter activity; INVOLVED IN: sulfate transport; LOCATED IN: integral to membrane, membran…	T
'34.6'	'transport.sulphate'	'zm00001d000204'	'(at3g15990 : 741.0) Encodes sulfate transporter Sultr3;4.; sulfate transporter 3;4 (SULTR3;4); FUNCTIONS IN: sulfate transmembrane transporter activity; INVOLVED IN: sulfate transport, transport, transmembrane transport; LOCATED IN: integral to membrane, membrane; EXPRESSED IN: 10 plant structures; EXPRESSED DURING: 4 anthesis, C globular stage, petal differentiation and expansion stage, E expan…	T
'34.7'	'transport.phosphate'	'zm00001d037468'	'(at1g68740 : 780.0) Encodes PHO1;H1, a member of the PHO1 family. Involved in inorganic phosphate (Pi) transport and homeostasis. Complements pho1 mutation.; PHO1;H1; FUNCTIONS IN: molecular_function unknown; INVOLVED IN: cellular response to phosphate starvation, phosphate transport; LOCATED IN: integral to membrane; EXPRESSED IN: 24 plant structures; EXPRESSED DURING: 12 growth stages; CONTAIN…	T
'34.8'	'transport.metabolite transporters at the envelope membrane'	'zm00001d049441'	'(at1g61800 : 529.0) glucose6-Phosphate/phosphate transporter 2; glucose-6-phosphate/phosphate translocator 2 (GPT2); FUNCTIONS IN: antiporter activity, glucose-6-phosphate transmembrane transporter activity; INVOLVED IN: in 7 processes; LOCATED IN: plasma membrane; EXPRESSED IN: 16 plant structures; EXPRESSED DURING: 10 growth stages; CONTAINS InterPro DOMAIN/s: Tpt phosphate/phosphoenolpyruvate…	T
'34.9'	'transport.metabolite transporters at the mitochondrial membrane'	'zm00001d016299'	'(at4g26180 : 392.0) Mitochondrial substrate carrier family protein; FUNCTIONS IN: binding, transporter activity; INVOLVED IN: transport, mitochondrial transport, transmembrane transport; LOCATED IN: mitochondrial inner membrane, membrane; EXPRESSED IN: 9 plant structures; EXPRESSED DURING: M germinated pollen stage, 4 anthesis, petal differentiation and expansion stage, E expanded cotyledon stag…	T
'34.9'	'transport.metabolite transporters at the mitochondrial membrane'	'zm00001d009705'	'(at4g27970 : 489.0) Encodes a protein with ten predicted transmembrane helices. The SLAH2 protein has similarity to the SLAC1 protein involved in ion homeostasis in guard cells. But, it is not expressed in guard cells and cannot complement a slac1-2 mutant suggesting that it performs a different function. SLAH2:GFP localizes to the plasma membrane.; SLAC1 homologue 2 (SLAH2); FUNCTIONS IN: trans…	T
'34.9'	'transport.metabolite transporters at the mitochondrial membrane'	'zm00001d008974'	'(at1g79900 : 328.0) encodes a mitochondrial ornithine transporter that exports ornithine from the mitochondria to the cytosol; BAC2; CONTAINS InterPro DOMAIN/s: Mitochondrial carrier protein (InterPro:IPR002067), Mitochondrial substrate carrier (InterPro:IPR001993), Mitochondrial substrate/solute carrier (InterPro:IPR018108); BEST Arabidopsis thaliana protein match is: Mitochondrial substrate ca…	T
'34.98'	'transport.membrane system unknown'	'zm00001d026156'	'(at3g47420 : 635.0) Encodes a Pi starvation-responsive protein AtPS3.; phosphate starvation-induced gene 3 (PS3); FUNCTIONS IN: sugar:hydrogen symporter activity; INVOLVED IN: carbohydrate transport, transmembrane transport; EXPRESSED IN: 22 plant structures; EXPRESSED DURING: 13 growth stages; CONTAINS InterPro DOMAIN/s: Major facilitator superfamily (InterPro:IPR020846), Major facilitator supe…	T
'34.99'	'transport.misc'	'zm00001d042692'	'(at3g23560 : 92.4) Member of the multidrug and toxic compound extrusion (MATE) family, protects roots from inhibitory compounds.; ABERRANT LATERAL ROOT FORMATION 5 (ALF5); FUNCTIONS IN: antiporter activity, drug transmembrane transporter activity, transporter activity; INVOLVED IN: response to toxin; LOCATED IN: membrane; EXPRESSED IN: 18 plant structures; EXPRESSED DURING: 6 growth stages; CONT…	T
'34.99'	'transport.misc'	'zm00001d039240'	'(at1g29520 : 179.0) AWPM-19-like family protein; FUNCTIONS IN: molecular_function unknown; INVOLVED IN: biological_process unknown; LOCATED IN: endomembrane system, membrane; EXPRESSED IN: 22 plant structures; EXPRESSED DURING: 13 growth stages; CONTAINS InterPro DOMAIN/s: AWPM-19-like (InterPro:IPR008390); BEST Arabidopsis thaliana protein match is: AWPM-19-like family protein (TAIR:AT5G46530.1…	T
'34.99'	'transport.misc'	'zm00001d028311'	'(at1g58340 : 351.0) ZF14; FUNCTIONS IN: antiporter activity, drug transmembrane transporter activity, transporter activity; INVOLVED IN: response to nematode; LOCATED IN: membrane; EXPRESSED IN: 16 plant structures; EXPRESSED DURING: 4 anthesis, F mature embryo stage, petal differentiation and expansion stage, E expanded cotyledon stage, D bilateral stage; CONTAINS InterPro DOMAIN/s: Multi antim…	T
'34.99'	'transport.misc'	'zm00001d024842'	'(at2g17500 : 159.0) Auxin efflux carrier family protein; FUNCTIONS IN: auxin:hydrogen symporter activity; INVOLVED IN: auxin polar transport, transmembrane transport; LOCATED IN: endomembrane system, integral to membrane; EXPRESSED IN: 19 plant structures; EXPRESSED DURING: 13 growth stages; CONTAINS InterPro DOMAIN/s: Auxin efflux carrier (InterPro:IPR004776); BEST Arabidopsis thaliana protein …	T
'34.99'	'transport.misc'	'zm00001d021629'	'(at3g21690 : 496.0) MATE efflux family protein; FUNCTIONS IN: antiporter activity, drug transmembrane transporter activity, transporter activity; INVOLVED IN: drug transmembrane transport, transmembrane transport; LOCATED IN: plasma membrane, membrane; EXPRESSED IN: 23 plant structures; EXPRESSED DURING: 13 growth stages; CONTAINS InterPro DOMAIN/s: Multi antimicrobial extrusion protein MatE (In…	T
'34.99'	'transport.misc'	'zm00001d020488'	'(at5g65980 : 161.0) Auxin efflux carrier family protein; FUNCTIONS IN: auxin:hydrogen symporter activity; INVOLVED IN: auxin polar transport, transmembrane transport; LOCATED IN: endomembrane system, integral to membrane; CONTAINS InterPro DOMAIN/s: Auxin efflux carrier (InterPro:IPR004776); BEST Arabidopsis thaliana protein match is: Auxin efflux carrier family protein (TAIR:AT2G17500.4); Has 1…	T
'34.99'	'transport.misc'	'zm00001d017199'	'(at5g58070 : 291.0) Encodes a temperature-induced lipocalin TIL1. Involved in thermotolerance. Peripherally associated with plasma membrane.; temperature-induced lipocalin (TIL); FUNCTIONS IN: binding, transporter activity; INVOLVED IN: transport, response to cold, response to light stimulus, response to heat; LOCATED IN: mitochondrion, endoplasmic reticulum, plasma membrane, vacuole; EXPRESSED …	T
'34.99'	'transport.misc'	'zm00001d015101'	'(at2g03880 : 198.0) Pentatricopeptide repeat (PPR) superfamily protein; CONTAINS InterPro DOMAIN/s: Pentatricopeptide repeat (InterPro:IPR002885); BEST Arabidopsis thaliana protein match is: Tetratricopeptide repeat (TPR)-like superfamily protein (TAIR:AT3G24000.1); Has 41924 Blast hits to 14587 proteins in 276 species: Archae - 3; Bacteria - 26; Metazoa - 84; Fungi - 128; Plants - 40967; Viruse…	T
'34.99'	'transport.misc'	'zm00001d009932'	'(at5g18970 : 161.0) AWPM-19-like family protein; FUNCTIONS IN: molecular_function unknown; INVOLVED IN: biological_process unknown; LOCATED IN: endomembrane system, membrane; EXPRESSED IN: 22 plant structures; EXPRESSED DURING: 13 growth stages; CONTAINS InterPro DOMAIN/s: AWPM-19-like (InterPro:IPR008390); BEST Arabidopsis thaliana protein match is: AWPM-19-like family protein (TAIR:AT5G46530.1…	T
'34.99'	'transport.misc'	'zm00001d000196'	'(at5g52450 : 475.0) MATE efflux family protein; FUNCTIONS IN: antiporter activity, drug transmembrane transporter activity, transporter activity; INVOLVED IN: response to nematode; LOCATED IN: plasma membrane, membrane; EXPRESSED IN: 24 plant structures; EXPRESSED DURING: 15 growth stages; CONTAINS InterPro DOMAIN/s: MATE family transporter related protein (InterPro:IPR015521), Multi antimicrobi…	T
'34.99'	'transport.misc'	'zm00001d000195'	'(at5g52450 : 459.0) MATE efflux family protein; FUNCTIONS IN: antiporter activity, drug transmembrane transporter activity, transporter activity; INVOLVED IN: response to nematode; LOCATED IN: plasma membrane, membrane; EXPRESSED IN: 24 plant structures; EXPRESSED DURING: 15 growth stages; CONTAINS InterPro DOMAIN/s: MATE family transporter related protein (InterPro:IPR015521), Multi antimicrobi…	T
'35.1'	'not assigned.no ontology'	'zm00001d052410'	'(at5g19750 : 141.0) Peroxisomal membrane 22 kDa (Mpv17/PMP22) family protein; FUNCTIONS IN: molecular_function unknown; INVOLVED IN: biological_process unknown; LOCATED IN: peroxisomal membrane, chloroplast, chloroplast envelope; EXPRESSED IN: 22 plant structures; EXPRESSED DURING: 13 growth stages; CONTAINS InterPro DOMAIN/s: Mpv17/PMP22 (InterPro:IPR007248); BEST Arabidopsis thaliana protein m…	T
'35.1'	'not assigned.no ontology'	'zm00001d049821'	'(at3g01920 : 227.0) DHBP synthase RibB-like alpha/beta domain; CONTAINS InterPro DOMAIN/s: Sua5/YciO/YrdC/YwlC (InterPro:IPR004388), DHBP synthase RibB-like alpha/beta domain (InterPro:IPR017945), Sua5/YciO/YrdC, N-terminal (InterPro:IPR006070); Has 7227 Blast hits to 7227 proteins in 2277 species: Archae - 193; Bacteria - 5396; Metazoa - 127; Fungi - 76; Plants - 77; Viruses - 0; Other Eukaryot…	T
'35.1'	'not assigned.no ontology'	'zm00001d048110'	'(at2g20830 : 116.0) transferases;folic acid binding; FUNCTIONS IN: folic acid binding, transferase activity; INVOLVED IN: metabolic process; LOCATED IN: endomembrane system; EXPRESSED IN: 24 plant structures; EXPRESSED DURING: 15 growth stages; CONTAINS InterPro DOMAIN/s: Formiminotransferase, N-terminal subdomain (InterPro:IPR012886), Formiminotransferas, N- and C-terminal subdomains (InterPro:…	T
'35.1'	'not assigned.no ontology'	'zm00001d035321'	'(at4g34290 : 100.0) SWIB/MDM2 domain superfamily protein; FUNCTIONS IN: molecular_function unknown; INVOLVED IN: biological_process unknown; LOCATED IN: chloroplast; EXPRESSED IN: 21 plant structures; EXPRESSED DURING: 13 growth stages; CONTAINS InterPro DOMAIN/s: SWIB/MDM2 domain (InterPro:IPR003121), SWIB domain (InterPro:IPR019835); BEST Arabidopsis thaliana protein match is: SWIB/MDM2 domain…	T
'35.1'	'not assigned.no ontology'	'zm00001d035246'	'(at3g62160 : 253.0) HXXXD-type acyl-transferase family protein; FUNCTIONS IN: transferase activity, transferring acyl groups other than amino-acyl groups, transferase activity; INVOLVED IN: biological_process unknown; LOCATED IN: cellular_component unknown; EXPRESSED IN: 22 plant structures; EXPRESSED DURING: 13 growth stages; CONTAINS InterPro DOMAIN/s: Transferase (InterPro:IPR003480); BEST Ar…	T
'35.1'	'not assigned.no ontology'	'zm00001d029590'	'(at4g37470 : 438.0) alpha/beta-Hydrolases superfamily protein; CONTAINS InterPro DOMAIN/s: Alpha/beta hydrolase fold-1 (InterPro:IPR000073); BEST Arabidopsis thaliana protein match is: alpha/beta-Hydrolases superfamily protein (TAIR:AT3G03990.1); Has 8593 Blast hits to 8591 proteins in 1653 species: Archae - 86; Bacteria - 6869; Metazoa - 120; Fungi - 103; Plants - 302; Viruses - 19; Other Eukar…	T
'35.1'	'not assigned.no ontology'	'zm00001d028004'	'(at1g78230 : 361.0) Outer arm dynein light chain 1 protein; INVOLVED IN: biological_process unknown; LOCATED IN: vacuole; CONTAINS InterPro DOMAIN/s: Leucine-rich repeat, typical subtype (InterPro:IPR003591), Leucine-rich repeat (InterPro:IPR001611); BEST Arabidopsis thaliana protein match is: Outer arm dynein light chain 1 protein (TAIR:AT4G03260.2); Has 24271 Blast hits to 14439 proteins in 74…	T
'35.1'	'not assigned.no ontology'	'zm00001d027876'	'(at5g12040 : 347.0) Nitrilase/cyanide hydratase and apolipoprotein N-acyltransferase family protein; FUNCTIONS IN: hydrolase activity, acting on carbon-nitrogen (but not peptide) bonds, zinc ion binding; INVOLVED IN: nitrogen compound metabolic process; LOCATED IN: chloroplast; EXPRESSED IN: 23 plant structures; EXPRESSED DURING: 13 growth stages; CONTAINS InterPro DOMAIN/s: Nitrilase/cyanide hy…	T
'35.1'	'not assigned.no ontology'	'zm00001d026244'	'(at1g31410 : 488.0) putrescine-binding periplasmic protein-related; FUNCTIONS IN: transporter activity; INVOLVED IN: transport; LOCATED IN: chloroplast; EXPRESSED IN: 20 plant structures; EXPRESSED DURING: 13 growth stages; CONTAINS InterPro DOMAIN/s: Bacterial periplasmic spermidine/putrescine-binding protein (InterPro:IPR001188), Bacterial extracellular solute-binding, family 1 (InterPro:IPR00…	T
'35.1'	'not assigned.no ontology'	'zm00001d025803'	'(at2g23360 : 167.0) Plant protein of unknown function (DUF869); CONTAINS InterPro DOMAIN/s: Protein of unknown function DUF869, plant (InterPro:IPR008587); BEST Arabidopsis thaliana protein match is: Plant protein of unknown function (DUF869) (TAIR:AT1G19835.2); Has 38218 Blast hits to 24021 proteins in 1620 species: Archae - 547; Bacteria - 4231; Metazoa - 19834; Fungi - 3463; Plants - 2306; Vi…	T
'35.1'	'not assigned.no ontology'	'zm00001d024763'	'(at3g62160 : 262.0) HXXXD-type acyl-transferase family protein; FUNCTIONS IN: transferase activity, transferring acyl groups other than amino-acyl groups, transferase activity; INVOLVED IN: biological_process unknown; LOCATED IN: cellular_component unknown; EXPRESSED IN: 22 plant structures; EXPRESSED DURING: 13 growth stages; CONTAINS InterPro DOMAIN/s: Transferase (InterPro:IPR003480); BEST Ar…	T
'35.1'	'not assigned.no ontology'	'zm00001d023480'	'(at1g19260 : 132.0) TTF-type zinc finger protein with HAT dimerisation domain; FUNCTIONS IN: protein dimerization activity; INVOLVED IN: biological_process unknown; LOCATED IN: cellular_component unknown; CONTAINS InterPro DOMAIN/s: HAT dimerisation (InterPro:IPR008906), Zinc finger, TTF-type (InterPro:IPR006580); BEST Arabidopsis thaliana protein match is: unknown protein (TAIR:AT4G09660.1); Ha…	T
'35.1'	'not assigned.no ontology'	'zm00001d022529'	'(at5g17780 : 328.0) alpha/beta-Hydrolases superfamily protein; FUNCTIONS IN: hydrolase activity; LOCATED IN: endomembrane system; EXPRESSED IN: 13 plant structures; EXPRESSED DURING: 8 growth stages; CONTAINS InterPro DOMAIN/s: Alpha/beta hydrolase fold-1 (InterPro:IPR000073); BEST Arabidopsis thaliana protein match is: alpha/beta-Hydrolases superfamily protein (TAIR:AT5G17720.1); Has 30201 Blas…	T
'35.1'	'not assigned.no ontology'	'zm00001d022254'	'(at3g62040 : 331.0) Haloacid dehalogenase-like hydrolase (HAD) superfamily protein; FUNCTIONS IN: hydrolase activity; EXPRESSED IN: 13 plant structures; EXPRESSED DURING: LP.04 four leaves visible, 4 anthesis, petal differentiation and expansion stage; CONTAINS InterPro DOMAIN/s: Pyrimidine 5-nucleotidase (InterPro:IPR010237), HAD-superfamily hydrolase, subfamily IA, variant 3 (InterPro:IPR00640…	T
'35.1'	'not assigned.no ontology'	'zm00001d018497'	'(at3g45090 : 540.0) P-loop containing nucleoside triphosphate hydrolases superfamily protein; LOCATED IN: endomembrane system; EXPRESSED IN: 19 plant structures; EXPRESSED DURING: 8 growth stages; BEST Arabidopsis thaliana protein match is: P-loop containing nucleoside triphosphate hydrolases superfamily protein (TAIR:AT5G60760.1); Has 35333 Blast hits to 34131 proteins in 2444 species: Archae -…	T
'35.1'	'not assigned.no ontology'	'zm00001d017290'	'(at1g61760 : 89.7) Late embryogenesis abundant (LEA) hydroxyproline-rich glycoprotein family; CONTAINS InterPro DOMAIN/s: Late embryogenesis abundant protein, group 2 (InterPro:IPR004864); BEST Arabidopsis thaliana protein match is: Late embryogenesis abundant (LEA) hydroxyproline-rich glycoprotein family (TAIR:AT4G05220.1); Has 824 Blast hits to 824 proteins in 28 species: Archae - 0; Bacteria …	T
'35.1'	'not assigned.no ontology'	'zm00001d016949'	'(at1g18720 : 111.0) Protein of unknown function (DUF962); CONTAINS InterPro DOMAIN/s: Protein of unknown function DUF962 (InterPro:IPR009305); BEST Arabidopsis thaliana protein match is: Protein of unknown function (DUF962) (TAIR:AT1G74440.1); Has 638 Blast hits to 636 proteins in 299 species: Archae - 0; Bacteria - 335; Metazoa - 3; Fungi - 143; Plants - 88; Viruses - 0; Other Eukaryotes - 69 (…	T
'35.1'	'not assigned.no ontology'	'zm00001d016933'	'(at5g64550 : 587.0) loricrin-related; BEST Arabidopsis thaliana protein match is: loricrin-related (TAIR:AT5G09670.1); Has 1807 Blast hits to 1807 proteins in 277 species: Archae - 0; Bacteria - 0; Metazoa - 736; Fungi - 347; Plants - 385; Viruses - 0; Other Eukaryotes - 339 (source: NCBI BLink). & (reliability: 1174.0) & (original description: no original description)'	T
[truncated: 423 more rows]
