# Supplementary material for: Comparative transcriptome analysis of differentially expressed genes related to the physiological changes of yellow-green leaf mutant of maize
Source: PeerJ. 2021 Feb 16;9:e10567. doi: 10.7717/peerj.10567 (PMC7894110; doi:10.7717/peerj.10567)
Supplement: Supplemental Information 6 [file peerj-09-10567-s006.xlsx]

## Sheet: Sequences of all DEGs
>Novel00001
GCCATTTTCTCCTCCGTCTTTCCAAACTGCAGTTTCTCAATCCAATCACCGCACGCGTGCACCGCCGTGCTCACCTGAAACTGCCTGTCACGCCGGCGCCCCCAACAACCCCGGCACCCGCGCTAGGGGTAGCCTTCGGCTACCCTGCCTCCTCGTTCGGCCCCGACGCTAGCCCCAGCATCTCCTCCCGTGACGCCTCCCTCGATCTCCTGTCCCGTTCCCCAGCCATCTCCAATCATGGATCCTGCGATGGAGATCCCCATGTCACCGCCAACGCCGAGATCCATCGGCCAGACGCAGACCGTAGCCCCGACCTCCCTCCATCGCCAAGCGTTGCGTTCAGCGTCGCCCCATCTGTCCTCGCCCATGGCTGGCATGGGGGTTTGATTCCCAGCGTAC…
>Novel00020
CTACACCCTCAGCATCATCTGTTGCACCTTCCTCAACTTCAACAGTTGATATGATTAAGTCAAGTATCGAAGAAGAGCTTGATAGCTACATATTTGATGGACAAGGTCATGATGATTCTATTGACACAAGTGACTTAGAAAAATATTTGGCAGATCCAATACTAAAGGTTGGTAAAAGTAATCAACACACTTTTGACATATTAGCATGGTGGAAAGCACACAAAGAAGAATATCCTGTCTTGGGCCAGCTTGCTCGTGATGTCTTAGCTATGCAAGTGTCAACAGTAGCTTCAGAATCTGCTTTTAGTGCTGGTGGTCGTGTACTTGATCCATTTCGTACTCGCCTTGACCCTACCATGGTAGAAGCACTAGTCTGCACCAAAGATTGGATAGCTGGAG…
>Novel00022
TAGCAGTGTGCTAACGTGTCTAGCGGAGGAGAGCTAGCGCCCTAAGTACATGCCGTCGTGGCAGCCGGAGAGGTTTTGGCACCCGGTTCGTGTGGTGTCGTGGCCGTCGGAGGAGCGCTGGAGCCTGGTGGAAGGACAGCTGTTGGGGCTGTCGAGTCCTTGCTGACGTC
>Novel00029
CGCCATCTCCTCTTCTCTTCTCCCAGCCACCAAGCTTCCTCCTCACGCACGCCCCTCCCCGTCTTCAACCTCCAGCAACCCAGCGGCGTGGGCGCGGCCCAGCCAGCCGCCCCTACCCCCATGCTCGCGGCGCGGCGGCGCTCCGGCACGGCGGCGTGCAGACGTGGCCCCCGGCGTGGGCGCGCGGCGCGGTGGCCCCCAGGTGGCTGGCGGGCGCGGCTCCGGCGCGGGCGTGCGGCTCCAGCGCGGGCACCCCGGCGTGGCGGCCCGCCCCGACCAGACCCGACGCGCAGGCTCACGGCGTCCGCGACGCGGCCAGCCCGCGGTGTCCCCGGCATGGCGCGCGGCGCGACCGGCGTGGCGGCTCGCGGCCAGCCTGCGCGGCCAGCCCGGCATCCC…
>Novel00038
TTTCCCTCTGTCTACCGCGCGCGCCCACCGCTACCTGCCAGTCGCGCGCCCGCCGCCAGCGCCCCGCCGCCACCCCGCGTGCCCCCCCCCCGCGCGGCGGCTCGAGTACTCCGTTGTCCGCTCCCATTCCACTCCGGCCCAGCTACGTGCTGCTCCGGCACCGGCAGGCGGATAAGCCCAGCAGGCAAGCAAGCAGGAGACTAGGAGAGGAGGAGAGCTCAGCACTGCACGCGCGCTCCCCTCCCCTTGCTGGCCAAATCAATCTGTCCCCTTCAGGCTCCAGGCTCCGGAGCTTGCTTTACTTCAGATGTATAATGCTCATATGGGATCTCCACTACAAGAAACTGATAAATGTCTGCGCCGTCTCCCCTCCCCTATCGTTGACGTCAGTTCGCTGAC…
>Novel00058
TTTTTCTAACCCTTCTTCCTTAGGTCGCTGAAATTGAAATTGATGTCTACAAAGTGTTTCCCATTTCATTATTAGATTACTGATATAGCTATGCCTAGAGAGTGGAGATAAGTGGAGGTGGCACCACCAATTCCTTGATGTACCAGGAATGTTTGGATTGTTGTATTCTGACATTGTTTGGTTCAACATATTCAAGTTGGAGTGTCAGGTCTCCAACAATTAAACTAAATGGAGGAGTGGAGCTTCATGTTGGGATGATGCATGCACCTTTCAAGTTTCGGAATGTTGTGCTCAACTGCAACTTGTGGCCGTTGAACCCATTCTACTTACTTTTAGATTTAAGTTATAGGATATTTAAAAATGTTTGATCTTCAATACTTGTTTTGGATGTTTTATGCT…
>Novel00070
CCCGTGGAGCTTCTCCTTCTCCCACACGACAGCAAGCTGGGGATCTCCTCCCTCTCCCATGGCGCCACACACCCTCCCCTGCAGCTTCCCCTGCGGCTTGGCCCCTCCTTCGCTCGGGCGCTGAGCAGGAGGTCCCCATGGCCGACGCGCGCCCCTGCTCGCGCCTCCACGGTCGTCAACGCCGTCGGGGCATCGGCTCCGAGCTCCTCTCCGGCCATCTTCCTCCCTCTGCTCCTCCTTCCTTCCTCCAATGTCGACCGAAGCCATGGAACCGAACCCGAGCTCTCCATCTCTAATCCAGCGCGCAGGGCATTTCTCAGGGTCTGAGCTCGAGCAGGTGAGCTCGTCCCCTTGGCTTGGGCTCCTTGTTTGCTTTCTGCACGTACGCTCCCTCTCCCA…
>Novel00087
AATTTTGTCATTTGTTTTAGTAATTATGTGATCTGCAATTGATCTAGCACAAGCACATTCAAATTGACCAATTTCTACTAGTGCTATAACTTTATTCCGAATGGATGGCTTCCTTCCGGAAAGACTAAACTGAATAATTATGTCAAAGTTGTTTCACTAGTTTGGCCTAATAGGTATTGATCTATGGTATCTAGACTACATATTGTACTATATGGTTGATTGTTCTGATTTCGGGCTTGGTTAATCTGACGTTTCTAGCATCCAAACATATAGATATATGTCAGCTACCTGTGTACCATGCACGAATAATCCTATAAATTCAGGTTGAATATTTTCTGCATGTAACCTAAAACTTCTACGCTATGGTCTTTCACTTACAGGTTGTTAAAGAAGAGCAGA…
>Novel00092
ATTTAAATCCAAAATAAATCGAAATCTTTCATTTATTTTTTAATTCCATCCAATATATATCGGATAAGAATAATCGAACAAGCCTCTAGCGAGAATCACTGGTTGTCGCACATATACGTCTTATTTTTGGTTCGCCAGCGCAGGAATATGTTACTAAGAATTTTGTTTAAGGTAGATTATAAAAGGGTGTCTGGTGGAATATCATGATAGAAATGTGTGTGAAAGGGCAAACATTGGATGATCTGGTCTGGAAGAGTTACTTTTGCTCTCTTGCAGGGGCTGCGGACATATGATGGCTGCTGTTTCTGGTTTCTCATTATCGTCAGCGTCACATGGATCTACACTTAGAGATGGCAGATGGCAAAGGGGCCCGATTCCCCTTTTTTTTGCGGGGAATTC…
>Novel00118
CTCCACCTTTCCACCCGATTGATTCACACACCACGTCGGCCCTAACCCTATCCCTTTCAACGGTTCCACTTTCACGCCACCCCAACCCCATCCGTCGTTGCCCGCCGCCGGCGCGACAGACGTCAATCCTGCCGTCACACCCAACCCAGCCCGACGTAGATCCACTCTCCCCCGCAGGCCCCTCCCTCCTCCGTCCGCCGGCGCGCTACTGCCTAGGAACGAAGGGCGTGCTGCGGGTCAGCTAGTGCTGCACGCTCGGCGGCGGCGGAGGAGGTTTTTTCACGTGCTTGGTGCGTCTGAGCTGTCCGGGGCCGCGCCAGCCAGACGCGGCGCTCCCGCTCCATCAGCGCGCCTGGGCCCCGCGGCGCCTTCTTCGCGCCGCCGCCGGTATCCTTTGCC…
>Novel00120
TTTAGATTCCCTTTTTGCTTTAGTGCATTTAAATTGTAACCACTATACCTTCTTGACTTCTATGGATATGGATACTTTTTAAAAACTTTTTTACAGGTGATTTTTAAACTCTATTCTATTGTTTATTTTAAAAAGCTAATTGCTCTTGATATGGGTGCATTGATTGTTGGTGCCAAATATCGTGGAGAGTGAGGATAGACCCAAGGCTGTTGTCAAAGAAGTTACAGATTCTGATGGGCAGACCATTCTTTTCATTGATGAGATTCACAAAGTTGTTGGAGCAGCGTCCATTGCAAGGAAGATCTACCAGAGGCAAGACATTGGTGTGGGTGGCTTTCAGAAGATTTACGGTGGCTGCACCTCAAGCGCTTCGGCAAGGTGGACAGCGCCAACAAGTAC…
>Novel00122
TTAAGTAGCATGTGGTTTTAGTTTTTTACCCTCTTCTAAATTGGGATATAGTCTTTCCGTACCTTTATGATTGAGGTTATAGCAGTTTTTTGTGCTCAAATTAACAAAAAAGTATAGAATAACCACATGCTTCTATTAAACCTGCCTTTTTCTACTTTGCAACTTAAATTAATTCTCCTAAAATGCATACATTTGCATTGTTCAAAACTATAAATTTGTCGATTGTTCCACTATTTAAGATACATTTTTAGATACTGTGATTGATCTCATTAAACCATGTTGGTTTCTACAACCAACTTAACAGTCAAGGAAAATTTACATTGGTACCGGACGCAGCTGGTGGCTACTAGGGCACGCCATGAGCAAACACAGCCAGCTTAGTGACTTGATATCTTGCAA…
>Novel00129
CTTAGATCAGAGCCCAGCAAGAAGAATGAATACTTTTTCAAGTACAGGGACCCCCGAAATGCAGCAGAAACTTTCAGAGCCAATGGAGATATAAATGGACTTATATCACACTGTAATAGTCAGATTGAGAGAGTTATGGAAATATGGAACAAAAACGAGGACTTCCGCAAGCAGTATGTTGAATCGAACAAGGTTAGCACACTAAAGAGATTAGGGACCCATGACGGACGAAAACTTGGCCCTGGTGAGGATCCTCCGGTCATTCCAAGCCGAAGACCAAGCAACATTTATCCATTGTCTGCCTCAAGCCCGGAAGTGATCACCTTAGCTTCAACACCAGCACCTGTATTGGCTGCTACAGCTGCAGTCCCTTCCAAAGAGAACTCTTTTCCTGCTTTG…
>Novel00155
TAAGAAACCTGTGAATTGACTATTTTGCCCTCCCACACATCCCGACTTAGGTTTTGGTATTTCGCCAACCTCGCGCTCTCACCTCCCGCCGCCGCCACACGCTCCGGCTCGTGCTGGTGCTCCCCTCCTGCCTACGGCCTACCCCATCGAGAAAATCCCATACAAGCTGGTGCTCTCACCTCGGCCGTTTGTGCTACTTCCGCTGCTCCTGGTGCTACTGTCGCTGCTTCCTGGTGCCGCCGCAGGTATTGCCCAAACTTGAATTGAACTAGACACAAAAGATTCTCTCATGGGGCGTCGTCCAGCCTTTTGCCCTCCCCTACTATCCAATCGATGTGCTAGGACAGCGGCACCAAACTCGTCCCCACCAATTCATGGTGGCAAACCATGCACTGCATC…
>Novel00159
GAACAGTTTAGCCCCATGTCAGTGGATTGGAAACACAAGTGGATTTCTCTTCCTTACCAAGGACAAACTATTCAACTGCATGGTTGCCCTCCTGTTGTGCCGGCCGGCACATTGTTGGAAATCAGGCATATTCCGGTGATGTCCGAATCTTCAGAGCAGCTCTTCTCTGTGGATAGCCTTGCTGTCCCTGAGCCGATTCAGCAACTCCTTCACAAATATGAAGCACTGTTTCAGCCTCCTACTACATTGCCTCCAAGCCGATTCTGTGACCACTCTATTCCTCTCATCGAAGGAGCAAGACCTGTCAATATCAGACCATACAAATTTTCGCCAGACATGAAGGATGAGATAGAATCCCAGGTTAATGAGATGTTACAAAGTGGGCTGATTCAACACAGC…
>Novel00173
CTGATATGGAGGATGGTTTAAATAATGATGAAATGGAAGCTCTATTTGAGGGTGATGCTGATGCCGGTAACAATGACCAAATAGCAGAGGACCATGCTGCCTGTGTCCCTATTGCCAGTGATGAGCATGCCATCGTCCAACAACAAGTTGGCCTAAGAAAGAAGAAATCCATGTATGTGAATGACCATCGTGTTGTGAAACAACAGAAACTAGCACCAACAGTGACAGCTCCCGCTATGAACAAGGATAAAGGTCCAATGCCAATGAGTATCTCCAAGCTGAAAACCAAGAAGCCAACCGGTACCCCTACCAGCAGCAAGCTAATGGAATCTGCATTCAAGGTCACATCAAGCAAGGACAAACTTATGGTTTTAATGCAAAAACCAGCTGAAGTTGTGC…
>Novel00216
TCAGGAGCGTCGTGGCTACCTCCGGTGCTGCGGCCAGCGCGACTAGGCCAGATCGACCCAGCGCGACGACGGCTGTGCGCGGCGTCCTCGGACATCGCTCCGCCAGCTCAAATCTCCAAGCGCTCGAGCTCGAAACTCCTCCAACCGGTCGTCCACTGCCAGCAATCGACCTCCATCCGCAGAGCACTCACCGAAAGGTGGCTCTGGATATCTCCTGCACTAACAGCACCACAAAAATTGCATTCAAC
>Zm00001d027232
GCAGGCACTGCTCCAGGGTCGGTTTCTGCGCAACAGCGGTTTATCAGAGGAGAGGAGGCCCCCATCTGTGGCCGCAAGGGAGCTTGGTCAACCGCGACAACGACATCCTGTCTCTGCCAGCTGTGTCTCAGGAACTCCAAGTATGGAGCACAATACTTGCTTGAACAATATCTGTTGTTTTGCTGTCCTATCTTCTTTCTACTGAAGATCACTTTAATGTATATGTAGATTAAGAAGATCATGCACAAGCTGTGGCAGTATAAGGTTTCATAGAAGTGGAAAGATCAAACAAAAATTTGGGATTGTTAGCTCAGAGGATATGGCTGAGCATGCTTATGAAGATAGATACGCTAATGTTGATTTAGTTTGTGCTCTATGCGACAATGGAGGTAAAATTGT…
>Zm00001d027233
TCTGTGAACCTTGGTGTACTTGAGAACTGTATAAATCATATTTTCTTTAGTGAAAATGGAGAACCAACAGAAACAGATCTGATGGGGCATAATGCTGGTCGCACACCATTCACAGACATCTCAAACACCAGCATTAGAGGTGATCAAAATGGATCAAACTCACTTGGACCAATGGTCGATGCTAAGGAACGTAAGAGGAAAAGGAATAAGGAAAGTTATGCCAAGATATCCATTGAACAAAAGAATGAGAACAATAGGAAGCGTCGTGAAGCACGTCAACGAAATAAAGGACTACCGATAAAGCCCGAGTCATCCAGAGGTCCTGTTAAAAACACTTCATCGGCTGGTAATTCTATCGAACGAAAGAGGCAAAGGGATAGAGAAAGGCGTGCAACAATG…
>Zm00001d027236
ATGTGCATTGCAGGGTTTGTGGTCATTGTTGTGGCTACTCTTGCTAGGGAATGTGCTGAATTTTTTCTCATTATTCTGGTTATGAGTGTTAAAGGTCTTGATATGGACCTCGGTGGTTTTCTCCACGTTAGGAAAGCTGGAAGAGTCTTTTCTACTCAGTTTTATGATAACAGTGGTGTTATGGTCAAACAAAGTCTTGCGTGTATGTACCAACAGCTAAACTGTAAACACGACATTACCATAGTTGATTACATGAATAATTATCTTTTATATCTTATTGTAAAATCTGAAACAGTTGTCATGTAGATGGTTAGCTTGCATTTTACGCTACAATTACTTCAAATCACTTCTTGTTTCATTTT
>Zm00001d027239
GATTCACCATTGCCCTAGCACACGTACGCGCAGATCCGTCCGCTCCAATCCGCCCCGGTCACCCAACCCACGTTTTCCCCCACGCCCCCATCCTTTCGATTCACCATTGCCCTACCACACGTACGCGCAGATCCGTCCGCTCCAATCCCCCTTCCCCATCGTCTCGCGACGCCCTCGCCGCCGCCTCGCCCCCAACGATCCACTCGCCCCCACAACGATTCGCTTCGTGGTGAAGAAGCCACCCGCGCCTCGCCGGAAACGGAAGCAGCAACCCCTAGCCACGCTGACCCTCCACGGCGCCGGCGATGGGGCTGAAGCGGCCTACGGCGGGAGCGGGGGAGGCAGCAGCGCAGACCATCACGTTGTCCATGTCGGCCATGTGGGACACGGTGCGCGCCG…
>Zm00001d027242
CGACCACGACCCCGATAGGCTGTCGGGCGAGAGGCTCATCATCAGCTTGCCCGGGCGCGCCTCGGTCTCGGTGGCGTCAGTGGGAACCGGCGAACCGGACACGACGGCCCACCGCCTCCCTCTGCTTCCTCCCGTCGAAGCCCTCCACCTCTGACACGGCGACCGACCACTCCTCCGACTCCGACTTTGCCACCACGAACAGCAACGAGGACACTGCCATCCTCGGCATGACGGGCGACGGGGCATTCGCAATCTCCTTCGCCGATCGCTTCACCGCCAGCGCCAGCGCAGCATTGTTCGTAGAGAAGAGGATGGTTCATGGTAGCAAAAGTATGGCGGTACCAGAACAAGGGATTCCCCCTAATGTTGTTGAGGATGGGGAACCCTTCAGGCACACCA…
>Zm00001d027245
ATGACCGTTGAACAAAGAAACGAGAAAAATAGAAAGCGTCGTGAAGTAAGCCAGCGAAATAAAGGACTTGCTATACAGGCAGAGGCATCTAGAGAAGACATTAATATGAAGACATTTGAGACAGTTAACTTTGAAACAAGTGGCTGTAGCGCAATTGATTTCACAAATTTTGCAACACAAGTTCCAAATAATAACACTTCACCGACCGATAATATTATCGAACGAGAAAGGCAAAGGCATAGAGAAAGACGTGCAAAAATGTCAGTAGACCAAAGGAACGAGTTGAATAGGAAGCGTCGTGAGGCGCGACAACAAAACAAGGGACAACATATGATGTCCACTATGTCAGGAGATGTAGACGAAAAAGTAAATGTGAATCAAGATGATGATAGCGATTGG…
>Zm00001d027271
ATCGAAATCAGTTTACGAGCCCTCCCTGTATCTCTCCACTCTCCTTCTCTGCCTCTCTCCCTCTCCGCCTACCTCTCCTTCCCTACCGTCTCCTGCCACTGCGCCCCTCCAATAGCGTTGTCCCTTGCCCTCGCGCGCCCCGTGCTCTTCGTCGTCTTCGCCAGCCCAGGTGGCAGGAAGCTACCCATAGCCAGCCTCGTCTTCTCGGCCAAATCCTTCTTCGGTGCACCGCTGGCCGCCACCTCGGCCTCCGTCGCTTTGTCGCTCCTGTGCCAGTGGCTGCCTCCAGCTCGCTCGAGGTCGTCGCTACGGGGAAGAAGGGGCCTTTCCGACCAAATCCTTCTTTGGCGCGCCACTGGCCGCCACCGCGGCCTCCGTCGCGTTGCCACTCCCGCGACA…
>Zm00001d027315
GGGTGAGCCCATCCGATCCACCTCTGTTCCACCACGCTGCTGGCTGCTGAGGATGGAGGCGGGGAGGGAGAGCTCCAAGGCCAAGCGCGCGCGCGCCGCCATGAGCAACGAGGACGACACGACGAGCCAGGGTAACGCAGGAGGTGGCGCGGCGGCGTCCGCCGCGGAGACGGAGGGGGACGAGATGGCCGTGGTGGCGGCAGAGGCGGAGGCGGAGGCGGACGAGCAGGTGGGGTCGGCGGAGACGGAGGAGCACATCCAGCGCATCCTCCTCGCCATCGACAACTACACCCGCCAGGTGTCTGACATGCTGGATGCCGGGCGCGCGCTGTTCAAGGACCTCGCCGCCGACTTCGAGGACCGCCTCTGCTCGTACGATCCACAAGGAGAGGGTGGAGC…
>Zm00001d027431
CTCTCTCTCTCTCATTCATCTCGCCTTTCTTTCTTACCGGCCGGCCGGCCGGCGGCTGGGCTCTGCAATTCACCCAACTTTTCTCTGTTTTCACTACGATCTCAGGGCTCCGGCGACCGTGCGGCCTCATCATCAGCTACAACCTACCAGCTGCTACCGTCTCGGTCGCCGCCTAGCTCTCCGCAGCGGCTAGCTCATCCGGCCGGCCGCCCCTTTTCTCTTGCCGTTGCGCAGTTGCGCCCCCTTCCCCGCGGCTTAGGAACCATCGAAAAGACGCCTCACCATCTCCTTTGTGTCCTTGCTAACTAACTCCCCCATTAAATCCTCTCCTTCCTCCCGCGCTGGCCGTGTGGTCTCTCAGCCCTCCGAGTTGATCCATAAGCTAGCGCCATCATCGAT…
>Zm00001d027451
AGGCTGATCGTTTTTTCCTTGAGAAATGATCCTCTGACCCTCATCCCCCAGACGGCCAGACCCCAGTGCACTCTATCCCCTCAGCTATGGCGACAACCGTCACGCCCGCCTCCCCGTTCCGCGACTACCTCCACCGCCGCCGCGTCCGCCTCCACGCCAAGCCGCACCCGCATTCCCAGCGCCGCCTATCACGCACCGCGCGGCTACGCTATGCTCCGGACGGTGGCGGCGCTGAGGTCTCGGGCCCTCCCGCTTCCGCGGCCGTCGAGGAGCAAACGCCGCAGGAACGGCCGGAGGACTTCATGCTCCTGGCTGCCAACCGCAGCGAATTCAACGAGATCATCATGGTCATCGACTCGCCCGTCGCGCGGTACCTCGTCCTCGACCACAACAAGAATA…
>Zm00001d027530
CCCGCGAAACACCACCAGGCAGATCGTGTTCCAGTGCAGCAAGCAGAGCAGAGCAGAGCAGCGTCGTGCGTCCGAGAAGAAGACGACTCACGAGAGCAGAACGAGCACCGATCGATGGCAGTGATGGCCGGGGCGGCGTCCATGGAGGTGGAGCAGGACCTCCCGGGCTTCCGGTTCCATCCCACCGAGGAGGAGCTCCTCGGCTTCTACCTCTCCCGCGTGGTCCACGGCAAGCAGCTCCACTTCGACATCATCGGCAGCCTCAACATCTACCGCTACGACCCCTGGGACCTTCCTGCGATGGCGAAGATTGGCGAGAGGGAGTGGTACTTCTTCGTGCCGCGCGACCGCAAGGCCGGCAGCGGCGGGCGGCCGAACCGCACGACGGAGCGCGGGTTC…
>Zm00001d027815
GCTATTTTTTTCATCTTTCTGCCTCGCAGACCTCTTCTGAAGAGGTCCTATTGGATGGATAGCGCAAGAAATTTGAAGGTGTCAACGCACTCATAAAGAACACACAACTCCTGAAGAGATTCGTATGAGCAACAAAAGCAGCAAGGCGTATCAGAGAAAACGCTAGGCAAAGGGCGAACAAAGAAAACCGTCACATATTACAGTTTAATCAGGAAAATGGGTTTGTCAATCTCATATCCACCAGATGACTATTTGCCTGAGGATGATGATGATGATGATGATGATGGTATTGACAGGCTGTTTGTGCGGTCTCTAAGCTTTGATAATCTCAACACACATGATACCCTTGAATCACCAACAGCATTGCTCGATGCACTGACCTCCAAGAGGCTCATGGTG…
>Zm00001d027873
ATGCTGCAGCTGCTGATGGCGCTGGCCTTCTCGGCGGCCCCGCTGACGCTGTACGTGCCGCCGGTGCGCAGCCTCAGCCTCTTCGTGGAGGCCATGGAGGCCGTCTGCCGCGACTGCGGGCCCTACTCCCACGGCGCCGTCGCCCGCTTCCGCCTCGGCTTCTCCCGCGTCCTCGCCGGCCTAGCGCGCGCCCTCCGCTAG
>Zm00001d027876
GCCGCAGCCGCAGCCACATCCACAGCCGCCGCGCTCCTCGCCCCCGGTCTAAAGCTCTGCGCGGGCGGCGCCCGCGCGCGCGTCTCCTGTCCCTCCCGCTCCCGCCTCCCACTCCACCGCATCGCCGCCATGGCCTCCGCCCCCAACCCCTCCTTCCGCCCGGAGGAGGCACGCTCCCCTCCCGCCCTCGAGCTCCCGACCCCGCCGCTCTCCAAGTTCAAGGTGGCGCTGTGCCAGCTCTCGGTGACGGCGGACAAGAATCGCAACATCGCGCACGCGCGCGCGGCCATCGAGAAGGCGGCCTCCGAGGGCGCTAAGCTCGTCCTTCTCCCAGAGATATGGAATGGTCCGTATTCAAATGACAGCTTTCCAGAGTACGCGGAGGACATTGAAGCTGGC…
>Zm00001d027919
CCAGACACTGATCCCGATCCGGCTATCCATCTCCTCCTCTTCGTTCGCGCTGCCAGCCCCAATCACTGACATCCCCTTCAACCATGGCGGCGGCGGCAGCAGTCGGAGGTGCGGTGCGCCCGCTGTCCCAGAAGGAGCAGGACATACAGATGATGCTCGCTGCCGACGTCCACCTCGGCACTAAGAACTGCGATTTCCAGATGGAGCGCTACGTTTTTAAGCGACGCACCGACGGTACGTGTCTTCTTCACTCCCGCATCCCTGCCTCCCCCCCCTTCGCATGCGAATCATGTAGATGACAGCAAGGAGGCCGCTGGTGCCCAGTGTTATAGTTCCGGGCGTGAGTATCCTGTGTGAATGGGCTATGAACTTGTCCCGTCGTATTTGTAGTGTGTTCTA…
>Zm00001d027925
CTCCTCTCTCCGCCGGCAACCTTATTGGTATCAAGAAAAACTTGTCGAAAAATACACAGGGCACAATGTGCGGAGGCGCCATCCTCGCGGAGCTGATCCCGCCGACGCGGCGCGTGGCGTCGAAGCCGGTGACAGAAGGCCACCTCTGGTCGGCGAGCTCCAAGAAAGCCGGCAGCGGCAGGGACAAGAGGCACCAGCACGAATACGCCGACGATGACTTCGAGGCCGCCTTCGAGGACTTCGACGACGACTTTGACGTGCATGAAGACGACGAGGACGGCCACTTCGTATTCTCGTCCAAATCCGCCTTGTCCCCAGCCCTGCACGACGGGCGCGCGGCGAGCCAGAAGAAGCAGCGCGGGCGCCAGTTCCGCGGCATCCGGCAGCGGCCCTGGGGCA…
>Zm00001d027932
GGCAGTGCAGCTGGAGGAGCACCTCACCAGTGGACATTGCTCCAGTCCCGCGTTCGTCTCCTCCCGCGAAATACCTTCCTTCTCCGGGTACACAGAAGAGAGTCCGAGACCGCTAGCTACATTAACGCTAGTCCCGCACACGCAGAGTACGTAATGATCCCAAGAGCGCCAGGTCTCTTCCGCCTCGAGGAGGGAGTGGGTGCCCGTGCCTCGACCTCGGCGCCAGCGGCGATGGCGGCGCCCGCCGGCGACCCGCAGCTCGTCGGGCTCCGCCTCATCATCCAGCCGTCGCCGAGGAAGCAGCAGCTGCCCGCGGTGCTCAGGAAGTCCGCGGTGAGGATTGTTAACCCGGCCACGGCGAGCGCGGTCAAGTGCCACGACGACGACGACAGCGGCCGG…
>Zm00001d027987
CACACACACAGACACACCACCACACGCCGGTGAGCCGGTCTCTCTCGCCCCCGTGCCCGTGCGCGCCACCTAGCCGTTCGTTCGCATCCATCCGTCCATCCGTCACACGCACACCACCACCAACCCGCGCGGCCGTGTCTATCTGGGTCTGGGATCGAGTAGCAAGCAATGGCGCTGGAGGCCGTGGTGTTCTCCCAGCCCCAGGCGGGCCACTTCGGCTGCGGCCGCGGGGACTCGCCGTACGCGGTGCCGTGGAGCGACCTGCTGCAGGGAGGAGGAGGAGGAGGGTTTGGCGATGTCTGCGCCGCGGGGGAGTGGGTCGACCAGCACGACCTCGACACCTGCTGGGCCGCGCCCACCGTGGGGGACGACTGGGACTGGGGGGAGGCGCTCTCGCGG…
>Zm00001d028004
CTCATCTCCCATCCCATCGGCTCTGCTTGCCAGTTCCGCGGTGAGAGCCCACCACTTCTGCGTCTCAAGGGGCAGAGGTTGTACGGATCGCTCTGGCCTTCGCCGCCGGTTGGCTCATCAACCACCGCGCGGGCACGGGCGCACGACGCAGGTGCCATTCCGGTCTCCGGCTCTCTCCTCCGGAAGCGCTCTCTCCCAGAACAGAACGCCTACCTAGTTACCTACTCTCTCGGCAACGTTTCCAAAAGTTCGTTGAGGCATCAAAGAATTGCCTGCCTGCGCCGTGCGACGGCGCGGCCGGGATGGGCAAGATGAGCTGCTTCTCCGGTCTGCTCAGCTGCAAGAAGAAGGCATTGGAGGGTAAGAACAAGGGCGCTTACGCCAAGAAGGCTAGCGGCA…
>Zm00001d028083
ATGGAGCGGCTTATAAGCGTGGGCGCGGACTTGATAGTAAGAAGTCTGTTGGTGGCTGAATTGGTTATGTTCAGCTCTTGCGCAGAGGAGCCGTTACTGGTGCGCGCGGCGCGGGGCGAGGATGGCATCCCACATTGGATGATGCGACAGGCAGGGCGGTACATGGCGGAGTACCAGGCGTCGGCTAAGGGGAAACTCACATTCGGCCATCAGGTTCGGGGAGCTTCCAGCTGCGAGGTTTTGAGGTGGGATTTTGACCTCAAGGTCCAAGGAGATGCTTATGGCGTCGATGTCAGATATCGAGACAACAAAACGGGGCAGCATGTGGGGACTGGATCAGAACCTTGATCAGCCCAAGGACAAGGATGTAAGTCAACTGAAGGACATGTACAGATAAAG…
>Zm00001d028140
GCGCGGTGCACGTTCTGCCTCCGGCAACCCGCCCCGCCCGCGGCCGCATCCCTCCCGCATCCCGCGGCCGCACCATCAACGGCGCAACAGCCGCATCCAGTCCCTCCCGCATCAACAGCGTCGCAGCCAGTCCCTCCCGATTCGCGCTTAATCCCCGCATCCCTCCCGCGGTGCAATCCAGACGCAAACAACTCCATTGACCCCGATTCGCGTACATGCTCTCTCACAGCAATCCCTGCTCTCTCCTCGCCAACGCCTCTCGATAAACTCCATGGAAGGTTCACACTGATGCGCTCTGATTCCTTGCTCCACGCTCTCTCCTGCTCTCGCGCTCTACATGGAAGGTGAGGCCGACGCCCAAATCGACGGAATCCCTGCTCTGCGCTCTCCCCTGCTCCC…
>Zm00001d028164
CATCACATTCAATTAATCATCGCAGGCGGCAGGCGAAGAAAAAGTGCAAAAGGCACTCCGCGAAACGCCTCCCACTCCGGTGAGCAACAGATGACTGATGATGCATGTGGCCTTCTTTGTGGCATGGTCCATAGCAATCCACTACCAGTCTACCACACCCGGCCAGGCAGCCCATATATAGCAGCATGTCAAATTTGCTCCGGCGTCCACACCACGCCCCTGCAAGTGATCGAGCATTTCCTCCCCCGGCCGGGACGGGGCTCATCCACGCTCGGGGACGGGATGGATGTCTTCTTCCTCTAACCGTACCCACGGCCTCTTGCCAGAGAATCATCCCATATCTTCGTCCCGTCCGTCCATATGCATGATCCATCGTCTCCTAGGCTAGGGCCGGTGATG…
>Zm00001d028165
TGAACGATAGCCTTTCTCACTCCGACACTTGAAACACGTTCATCAGGAGCTCGTCCTCAGGCTTGCTAGTAGCTTATATTACCTACCTAGCTAGCTAGCTAGTCAAGACTCAAGATCCATCCATGCCTGCAAACATGATCTCCAAGATCCTTGAGAAGTCGTCTGTCCTTCCGCTGGTGGACGATGTTATTGCACCCATCCATGTGAAGACCGCTGGAGGAGCTCCTCGGACCAGTGTGCTGCGCAATCCGAACATGGAGAAGCTTCAGAAGGGCTACCTGTTCCCGGAGATTAGCATCAAGCGTGAAGCTCACCTGAAGAAGTACCCTGATGCCAAGGTCATCAGCCTGGGCATCGGCGACACAACCGAACCCATTCCAAGCGTCGTAACGTCAGCTA…
>Zm00001d028252
ATCCCAGCAGCAGGTAGCAGCAGCGCATGACTTTGTATCTGCAACTCGTTTCGACTAGCCTGCACGCCGGGAGCCCTCGTCTCGCCCTTCTCCACCTCCGAAGATCCTGCGAGTTCAACCCGCGAGTGAGCATGTCGTCCTACTCCCCGCCGCCGCCGCCGCCGCGGGACCAGTCCATGGACACCGAGGCACCCAACGCGCCCATCACCAGGGAGCGGAGGCTCAACCCCGATCTGCAGGAGCAGCTCCCCAAGCCATATCTCGCGAGAGCTCTCGAGGCGGTGGACCCGAGCCACCCGCAGGGGACCAAGGGGCGCGACCCCCGCGGCATGAGCGTGCTTCAGCAGCACGCCGCCTTCTTCGACCGCAATGGCGACGGCGTCATCTACCCCTGGGAGA…
>Zm00001d028298
GAGTGGGGATACCTAACATTTCCGCGAAATTCGTGTGTTCGAGAACGGATAAGAGAAGGTCAGGCACAAACACGCGGGGACGAAGCACACAACAAACCTGCAGATCCCCCATGGCAGGCTCCACCTCCCTCGTTCCCCTTCCCGTCCCCGCCCCTCCATCTCGCCACCGCTTCCACACGTCCACGTCCGCATCCCCCCGCCACCTGCGCCCCTCCCCTGCTACACGCCTCCGCGCTGCCCGGCGTCGGCATCCCGACGCCGTCGTTGTCGTCCCAGATGCCCGCCCCTGGGTCGGCGATCTATCGGGCGCCGCCGCGTCCTACCGGGACGGAAGTGAGGAGGACGAAGACGACGCAGATGAAGATGAGGACGAAGACGAGGACCGCAGCCTGGACCTAC…
>Zm00001d028311
ATGGCGGTCACGGGCCTGGTCATGTACTCACGGGCTCTCATCTCCATGCTCTTCCTGGGCCGCCTGGGCGAGCTGGCGCTGGCCGGCGGCTCGCTGGCGCTTGGCTTCGCCAACATCACCGGCTACTCCGTGCTCTCGGGGCTGGCGCTCGGCATGGAGCCCATCTGCGGCCAGGCCTTCGGCGCGCGCCGCGGCAAGCTGCTGGCGCTGGCGCTGCACCGCACCGTGCTGCTGCTCCTCGCCGTGGCGCTGCCCATCTCGCTGCTGTGGGTCACCTCCACGGGGCACGTGCTCAAGCTGCTGGGGCAGGACGAGGGCGTGGCGGACGCGGCGCAGACGTTCGCCGCGTACGCGTCGGCCGACCTCGCGGTTCTGGCCGTCCTGCACCCGCTGCGCGTC…
>Zm00001d028338
CGCACGGGTGACAGACTGACAGGTCCGTCCGCAAATCTGCAACGTTGCCTCGTCACCTCTATCCTCCGGTCTCTCACCGCCTAACACGGCCGCCATGGCCGCCGCCTCCACCTCCCTTCCCCTTGGCTTCTCCTCTCACCACCGCCCAACTCCCAGAATCCGGCCGCAGCCCCAGTCCCAGTCGCAACCACTGAAGGCAAAACCCCTTAACCCCCTTCGCTTCAGCCTAGCCCTCACCCCGGCGACCGCGAAGCCCCGCCTCGCTGCGATGCCCGACGATGTCGCTGTCGCCAACTTCGTGGAGAAGGACTGGTCGTTCCTCGAGTCCGCGGGCGCAAACCTCCAGCGCGCTCTCGCGTCGGGGGCGCTCTCGCCGGCGTCGCGGGTGTTGGCATTGAC…
>Zm00001d028423
CAAACGCGGACGAGGGAGCACTGCAACTGCAAGCGCCCCATAGGCCGCAGCGCTATCGCGACGTCGCCACCGCCCACCGGCCACCACCACAAGGCACACGGGGACGGGCGCCCGCTCCACTACCACTACCTCCCGTCAGTCAGATCCCAATCAAAAGAGGAGCATCGCAGAGCTGTACGTATCACGCAGGAGGTAGCGTTCCACTCGCTTCGCGGTGGCCATGGTCTCGTCTCCTTCCCCTCCCTTGCCCACCGGTGCCTCCGAGCCGAAGCAGCAGCGAGGCGGCACCAAGGCGGCGCCGGAGAAGGCCGACAAGAAGTACGCGCACGTCCCAACACCGCTCCACCACGGTCACGGCGGCGCCAGCAACAAGACAACACCCCGCGGGGCCAAGGACGC…
>Zm00001d028572
GCTGTTTAATCTCCGGGTATCCGGGTAGGTGGGTTCTGGCGGGTTGGGACGAGCTCGGGCCAGCAAATGGTTGCTGCGAAATACTACAAAAAAGGGAGAAGAGACGAAGAAAAGCTCGATGATTAATTGGCGGCGAAGCCAGTACATTAAACACTTCGTCAACCCCAACCGTAGTAGTGCTCAAGGGGAGACGGAGGAGGAGGAGGAAGCGGTATAAAGCCGCGGCGTCGTTCGTCGGCAGCCGCGTCCTGAGTCGCTCGCAGTCGCAGCCGACGCCTTTTCCTCCTCCTTGTCTTCTTCCTCGCTGCAGCTCTCGCCGCCGAGGTCCTGGGCGCCGTCGACAAACCACCTCCCTCCCCCGTCTCTCGTCGTCTCGGAAGGAACGGCCGCCCGTCGCGC…
>Zm00001d028596
GACCTCCGTCATATCACATGGTCGCCCATTTCTTGCGAGCACTTTGGTCAGTTGGTCTTCTCTCTCGGATCGCGGTTGGGGGGTTGCGGAATGGGAGCAAAGGCGGAGGAGTGTGAGGTGCCGCCGCTGGCTGCGAACGCGGAGGAGGCAGCTTCCACCAATCAGTGCACCCTCATCTTCAAAGGCTGTTCCAACAGCATGGAAAAAGTCTACGCCATCAGCAGTCCTAGTAAGAAAAGAAAATCACAGTATGAGCTGAGTGATCCAAAGTTGCTACCACTTAAATGCAAGTTTCGCAAACGGTTATATTGCCAGGATGATGAGTCTGCAACCACAGAAAGTTTAGGATATGATGGTATTTTCATGAACAAGACCTCTGGGACGGACATGGTCAGCATA…
>Zm00001d028603
GCCCGGGAGCAGAGCACACCATCCTCGCATTATTCTTTTCGGATTTGCTCCACCCCTCCACTCCCATGCCCGTGTCCATCTCAGGCTGCGTCACATCATCGCCGCCACACCCAGCACCAGCACCAGCGGCGGCGCACCACCACCGGCGCCATCACCAGCGCCAGCGCTAGCGCCGGCGCAGGCGGAGGCCCGGGCGACGCGGACTGGGCGAAGTTACTGGCCTTCTTTTCGTCAGCGGCGTCCCTTGCCATCAAGCTAAGGTCTTCCAGCAAGGTTACGTGGAGTTTACCAATGGGTCTGGATAATACTTATGGCGACCTATCTGGCATGTTCTATGGAGGCCTGTCTTATGATGGCTACACAGACCACAGCAGCGCAAGTGATTACTTCAGATTTGCC…
>Zm00001d028613
CTCCACCGCCCTCCCTCGCAGGCAGGCAGGCAGCCAGAGCCAGAGCCAGCCGGGCAAGCACTGCAGCAGCCATTGTACTCATCACCTCCTTCCCACGCAGCGAGAGGATGACACCACGAGGCAAATAAACCCAGACGTAGTTCAGCTAGCCGCTTCTACCTCCCTCTCCCCCCCCGCCTGCGCGCTGCCGCGAGAGCTCGTTCCTGATGGGGAACTGCGCCGGCGTGGAGGGGAACGCCGAGATCAACCCTTCCTTCAGTGCCCCCAATTCCTCAGGGACCGCCGGTTCTAAGAGCGTCAGCAAGAACGCGGCCGACACCAGCACCTTCGGCACCAAGACGTCCGGCTCGTCGTCGTCGGTGCCGCCAACCCCTCGTACGGAGGCGGAGATCCTGGAGT…
>Zm00001d028616
TTTAAGCAGCTCTGCACTCCCCCCTGCTCTCTCCCAGTCCCAGTCCCAGTCCCAGTCCCAGGACAGTCCCGTCAGCAGCCACTTCCCCGGCCCCTCCCGCTCCTGCTCGCCGGAGGCCGGGCCGGCGGCGATGGGGCACGGCGCTAGCTGCGGCCGACCAAGCGAGGAGGTAGACTTCTTCGGCGCGGCGCAGTCCGGGGACATGGCCCGCCTCGCCGCCGCTCTTCGCTCCCGCCCCACCTTGCTCAGCCGCACCACGCTCTTCGACCGCCTCTCCGCGCTCCACATCGCCGCCGCACACGGCCACCTCCAGGTGGTCTCCCTGGCATTGGATCTTTGCGTGCACCCCGACGTCGTTAACCGCCACAAGCAGACGGCGTTGATGCTCTCGGCGATGCA…
>Zm00001d028751
AGTGGAGCTAGGCACGCAGCCGCAGCCGCAGCAAGCAAGCAAGAGCTGCGACTGCGAGCAGGCTTATTAAGCTAAGCGACGACCTCCGTTCCATTGCGAACAGGCTACAGATCAGAGTGAGGAAGAAGAGGAAGCCGAATTTCTTTTCACTCTCCCGACTGACCTTTCGCCGGTGCGCACGCCACCTCGGGTCGGGAGCGTCGATCGAGTCCGTGGCGGTGGCGGCGTGGGACGGTGACCGGTAAGTTTGTACAATATAAAGCGCGGCGGCCACACAGTCACACACACACACACCAGCTGGGAGCTGCGGAGATGCAGCAGCGGCGCAAGTCGGTGTTCGCGTCCGCGCCGTTCGCGATGAAGCAGGCGGCGCTGGGAGCCGGCGTGGCGGCGCGCAAG…
>Zm00001d028778
GCTCTCCACCTGACCTGCTTTCGTTTTCGTATATGTGCCAGCAGTCCAGCAGCACCAACTTGTCCACACTCGACACTGTGTTGATTGAGACCTTAGCTCTAGCGGTTTCGTTTCCGGATGGAGGATTCGGTGGGCGCGGATGAGAGGAGGGAGCAGAGCGAGACGATGCCGCACAAAAAGGCGCGCCAAGAAGTAGCGGAGGCCGGTGGTGTTGGCGGCGGCGGCGGCGGCAAGCCAGCTGAGGAGGGCGGGTTCCTGAGCGCTGTGGCGTCCAAGATCGGCGCAACGATGTCCGGGGCCAATGGCGGGAGCGGCGGCGAGGTCGGTGCGGCCATGGCGTCCGACGGCGAGGAGGGAAAGAGGGACGGTGACGGCGAGCCAGGTGAGGAGGGCGGGTTC…
>Zm00001d028806
ACAGCAGAGTAGAGTAGCACACGCACTCGCCTCTTGTGTCTTTCTTTGTGAGCTGTGGTGTGGTGGTCGAGACACACACAGCAGCAGCAACAACAACATACATACATGCACGCTAGCCTCGCCTCCTACGCCGCGGCAGCTATGCCGGCGCTGGACCTCCGCCCCGAGATAGCGCACGCGCACCAGCCCGTCATGTCGCCCTCTCACCACGGCTGGGACGGCAATGGCGCCACAGCCGTGCCCACACCGATGCCCAAGAGGCTGGACGGGAAGGTGGCCATTGTGACGGGCGGCGCGCGCGGGATCGGCGAGGCCATCGTGCGGCTGTTCGCCAAGCACGGGGCCCGGGTGGTGATCGCGGACATCGACGACGCCGCGGGGGAGGCGCTGGCGTCGGCG…
>Zm00001d028808
ATGCTTAATGTAACGCTCCTGTATCCCTATATAAAGCACCCCACACACACACAGTCCATCCAGGCCTCCACCGCGTCCTCTGCTCCTCTACTCCCCTCTCCATCCATCGCACTCACACGGTCACACTCACACCCCCGCCGTCTAGCCGTTTCAGCTGCAGAGCCTCTCGAGCGGCGCCCGCGGCAGGAGCTGGCTACCCCTCGACCAGGTCTGGGAGCGGCGCCGCCGCGCCCGCACGAGACGGCGGAGCTGGACGCGGAGGCGGCGCTGGGCGGGGAGTCGGCGGAGGAGCGCAACCGCTTCCTGGTGCTGCGGCTGTACGAGGCGCTCAACGCCCGCGACGCGCGCCGGGCGCAGGAGCTGCTGGCGCCGGACCTCGAGTGGTGGTTCCATGGCCCT…
>Zm00001d028941
ATGGACAGCAAGCTGGGCGTGCAGCACGGGCACCGCCACCACCACAGCCACAACGGCGTCTCCAAGCCGCCGGTCGCAAGGAGGAGGCAGAGCGGCGGCGGCGGCGGCAAGGGGGTCAAGGTGGTGTACATCTCCAGCCCCATGAAGCTCACCGCCAGCGCCGAGGAGTTCCGGGCCATCGTGCAGGAGCTCACCGGCCGCGACTCCAACGTCGCCGACCACGACCTCGACGGCGGCGGCGCCTACCACGTGGGCGCGCCGTCGTCGTCCTCGTCCTCGTCGTCTTCCTACTCCTCCCTCGGACGCGTCTCCCCGGCCGTGGCGGAGGCGGCGGCCGCCGCAGCGGCGGGAGCCCGCGCTCGGTCGTCGCCGGCGACCAACGCCGGGGGGGCGTCGCCG…
>Zm00001d028984
GAGTAGCCATAGTTTGTTAGAGCATTCCCCCAAGGAATATAACACCATTGTGTGACGAGCAACCCTTCACCAAAAACTAAGGACTGATAAACTGCAAGAGACCGTTCCTATCAGGATTGTGGAGTCTGCAACCAGATATCAATGCATAACAGAATTGAAGAGATGTATCATCATCAACAACAGCTTCAGAGCCACAGTCATTTCCTGTCTTCTAGGCAGACATTCCCTCCAGAAAGGCACATGCTTCTGCAAGGAGGGAGCATTCCAGCAGAGCCAGGGCTTGTGCTTTCCACTGATGCTAAACCTAGGTTAAAATGGACACCTGAACTACATGAGCGTTTTGTGGAGGCGGTAAACCAACTTGGTGGGCCTGACAAAGCTACACCGAAGACAATCATG…
>Zm00001d029101
GATCGATGGCGCCCACCAAGAGCCATGTCCTCCTCGCCGCTCTCCTCACCGTCGTCGCCGCCGTCGGCCAGACGCCTCGCGCTGCGGAGGGGTTCAATATTCCTGGTCTTGGCAGCATGCTGAATCCCATTCCCGTCGTCGCCGGTGTAGTGCCGTGCAGCATCGGGAGCTCCATCAACCCGGCGCTGGTGCCAGGGTTCCCTATTACTTGCCGTTCCCTTATATTATATGTTTCTCTTGTTTCGGTCCCGCCAGACGCCAACGTGCAGCTGATGTGCGGCGGCACCGTGGTGGCCAACGCGACGACAAGCATCACAGGATCCTTCATCCTCACCCCGGTAAACGCTACTCTTGGTCTCTTCAGCTCCATGTTGGGCGGCCAGTGCAATGTGGTGGTGA…
>Zm00001d029114
GCCAAGCCCACATCCGCCACTCTCCACGCTCGCACACGCCGCCTCCTCCTCCTCGTCACCTCTTCGCCGCAGTGGCTCCCGTCGTCCCACGCCTCCCTCGTCATGTCGAAGAAGGCGACTCTCCATCCCTTCCGAGTTCCGAGCTCATGCTCCCCTCCGCCCCTGGCATGGGTGAAGTCTATGTGGGAACACTGAACCTGCAACCGAGATCGTAGAGATTCGACAATATCACAAGAGGATCATACTTCTACTCCATGAAAACTGTAACCTACTAGAGCTGAAAGAAATATAGAGCCTATAAGAAGGAAATGTATGAGATGCAACCAATGTACAGTAAGCAACTTACCATATTTCTTTATGACATTGTTCCAAGAATTAATAAGTATTCCAGTGAGCGTC…
>Zm00001d029233
ATGCAGATGCAGGCAGCAGGCAAGGAGCCTGCGGCCGCGGCGGTCCCTGCCGCCAACAAGCCACCGAGCATCTGCGACAGGCTCCAAAGGGCCTTCGCTGCCCGGCCGGCGTTCCGCCCCCTCCGCCGTATCACCGTCGGCCGCCACCAGGACGGCGGAGCTGCCAAGCCTGCTGGTGCCGGTGATGGAGTCAGCGCAGCGTTTGGGCCAGCTCCTAATAAACACAGCGGCCCGCCATTGCCGGCTCCGCCGGCCACAGTAGCACCGCAGTGTGAGCAGCCGGTTCCCGTGCGTTTACCAGCCGTCGCCAGCAAGGTGGCGGCGGGCGGCGCGCCAACGGGGCCGCCGGTGCCTGTGCCACCGCCGGACGTTATGGCCGGGGACATGGGCCAGCAGATC…
>Zm00001d029246
ATGAAGTACAAGAAGAGCCGCGACGCCACGGGCCTCGGGTCCAACGGCGACGGCGGCTGGCAGAAAGGCGGTGGCGATGTGCCGCCGAGCATCCAGCTGGACATCATGGAGCACCGTGGCGCCGCCGCCACAACCGGGCTCGGGACCGGAGGCACCGCCGGCTCGGCGTCCTTCTTCGAGCCGTGGCGCGAGCGGACGCCGGGCAGCAGCGGAAGCGGGCGCGGCAGCTCCGGCGGAGGGGGCGACGGCCGGGAGCCGCCCGAGAAGCGGCTCACGCTGTTCGCCCTCCGGCTGGCCGTGTTGGAGAAAGCGGCGAGCGGGCTCGGGAAGCTCGACTTCGTCTGGGCCACCGTCGTGCTCCTCGGCGGCTTCGCGAGCACCCTCAGCATCACCGACTTC…
>Zm00001d029247
ATGATGTACAGGAAGGGCCGCGACTCCAACGGCGACAAGTCACAGGAAGGCGGCGGCGATGTGCCGCCGAGCATCAAGCTTGACATTACGGATCACCCTGCTAGCGGCGGCGGCAAGACGGCGTCCTTCTCCGAGCCGTGGACGCCGACGCCTGGAAGTGGTAGTTGTCGTGGCAGCAGCAGCAGCAGTTCTGGTAGGAGCGACCCGCCGGAGAAGCAGCTCACGCTGTTGGCGCTACGCGTGGCTATCCTCGAGAAGGCGGCGAGCGGGCTCGGGAAGCTCGACTTCGTGTGGGCCACCGTCGTGCTCCTCGGCGGTTTCGTGAGCACGCTCAACATCACCGACTTCTGGTGCATCACCGTGATCCTCGTCGGCGAGGGCGCGCGCGTCTTCAGCCGC…
>Zm00001d029325
GTCCAGTCCTCTGTCCTCACCTTATCCCCAAAACCCTATCAGCCCAAAACCGAACCCACACCTCTGCGGCTCTGCCCTTCCCATGGCGGCCACGCTATTCTCCACCTCCCTCTTGCCCCAGTTCCTCTCCCTCTCCGCTAAGCCCGCCGCCGCCGCCCCGTCCGCCGCCGCCTTCCCATCGGGGCTGCCGCAGCTCCACGCGCTGTCCGCCGCGGCGGTGGGCTTTAGGCCGCTCGAGCCCGTGCGAGCGGCCGCGACCGCGGCCGTGACGGAGGAGCTCGAGGCGGAGGGGCGTTCGGGCGGGGACGAGTTTTCAGATGATCTCAGGGTCTTCGTCGGTAACCTTCCGTTCAGCGTCGACAGCGCCCAGCTCGCGGGACTTTTCGAGCAGGCCGGCTC…
>Zm00001d029359
AGTCTCACCCACAAGAGACACAAACCTAGCGCAACAAGCAATCGAAAAAGAGATTTGGCTACAACCAATTAACCATATTGGCCAGCAGTGTACGTGGGAACGATGGCCCTCATGCAGGAGAGTAGTAGCCAGGATTTGCTCCAAGCTCACGACGAGCTCTTGCACCATTCCCTGTGCTTCGCCAAATCGCTCGCGCTCGCCGTGGCGCTAGACCTCCGCATCCCCGACGCGATCCACCACCACGGGGCCGGCGGCGCCACCCTTCTCCAGATCCTCGCCGAGACTGCGCTCCACCCAAGCAAGCTTCGCGCCCTTCGCCGCCTCATGCGCGTGCTCACCGTCACGGGCATCTTCAGCGTCGTCGAGCAACCACCAGCAGGTGGTGGTGATGATTCAACC…
>Zm00001d029360
ATGGCGTCGCTGGTGGCGTCGACGGCCACGGACGATAAGGGTGTTGAGTTGGATGGTGTCCTTCGCGCAAAGCTTCTGGAAATTGGAATCGTAAATGGCATGGATGTTTATGAATGGGATCCTTCAACATATAAGTACATCAGCGTGAAATATGATGCAACAACGGTAACTGAAGCAAGGGCTCTCAATAAAGAGAGGTTGCAAGCCGAAGATGGATTGCGTGTGGACTCGAGCATCCCTGTTATAGTTTTTGTGGGGTGTCTCGAAGAACAGAAAGGGTCCTACATACTCATTGCAACAATTCCAGAGTTTGTGGGCGAGAATGTCCAGATAATCGTTCTTGTATGTTTCAATTTACAAGTGGTTTCTATTCTTTCGCATGGCACGGTTCACGATCTG…
>Zm00001d029387
GCAGGCTAACCGAGGAGCTAGCTAGCCAGCAACGCGTAGCAAGCAGCGCAAGCAAAGCTCCGAGCGCCCGGCCGGCTAGCTTCGCCATGAACATGGGTGGAAGGTCCCCGGCGGCGACGACGATCCGGTGCAAGTACTGCAGCGCGAGCCTGACCGTGTGCGCCGGCGAGCGCGCCATCCAGTGCGCGCAATGCTGCGGCGTGACTCGCATCCGGCGGTCGCTGTCCTCGCGGCTCCCGCTGCCGGCGCTGACGAGGCCGGCTTCCGTCGCGGGCTTCCCGCCGTGCGGCGGCCGCGGCAAGAAGCGCGCCGTCCTGATCGGCATCACGTACGGCGGCGCGCGCCGGGGCTGCGGCGAGCTGCGGGGCCCCATCAACGACGTCAAGTGCATGAGGCAGC…
>Zm00001d029390
CTGGAGACAAACATGAGAGACGACATGGGGATGACGATCGAAGACGTGATCGAGGAGTGCAAGGTGTTCTACTTCGCCGGGATGGAGACCACGTCGGTGCTGCTCACGTGGACGATGGTGGTGCTCAGCATGGACCCGGAGTGGCAGGACCGCGCGAGGGAGGAGGTGACGGCTCTGTTCGGCAGGGACGGCAAGCCCGAGTACGACGGCCTAAGCCGCCTCAAAGTCGTGAGTACTGCTGACTACTTCTTCCGGCCGTTCATTCAGATTACTCTTGTTCCTTTTGTGTCGTCGTCCGTGCGCGTGCGTGCAGAACGACCGATGGATGAGTGAAACGGCAACGCATGCGTGCCGTGTATATATATGCTGCAGGTGACCATGGTGCTCTACGAGGTGCTC…
>Zm00001d029501
ATGGCGAGCGCGGGCACTACTAGGGCCGCGGCGGCGGCGCTCCTCTTATCCCTCTCCGCCGTCCTTCTCTTCCTCCTCCTCCAGACACCGCCGCGGGGCCTCGCCGACCATGTGGCCGCCGCGCTCGACAGCTTACTCGACTGGCGCGGCCTGCTGGAGCTGGCGACGCGCAGGAACATGATCCTCCTCTGCCACGCCATCCTCCTCGTCATCCTCAGGGACGCCGGAGTCCTCGGCACGCCTGCCGGCCGTCGCAGCCAGAGCCACAGCCGCAGCCCGCCAGCGGCCGTCGCACAACAAACCGCGAGCTCCGTCGCTCCGGCTCGGTCCCACGCCACCGGGAGCGCCGTCGTCGTCTGGCGCCGGCGGCCGCGGAACAGGGCCGCCGGCGCCGCCGCG…
>Zm00001d029558
ATGGCGTTTCCGAAGCCTACTAGTCGTCTAGCCGCGCTAGCTGCCCTCGCTGCGGCCATGGCGGCGGCGATGATGGCCGCGACCGCCTCGGCGCAGAACACGCCGCAGGACTTCGTGAATCTGCACAACCGCGCGCGCGCGGCGGACGGCGTGGGCCCGGTGGCGTGGGACGCCAGGGTGGCCAGGTACGCGCAGGACTACGCGGCGAAGCGCGCCGGGGACTGCCGGCTGGTGCACTCGGGCGGGCCGTTCGGCGAGAACATCTTCTGGGGCTCGGCGGGGCGGGCGTGGAGCGCCGCCGACGCGCTGCGGTCGTGGGTGGACGAGAAGAGGAACTACCACCTGAGCAGCAACACCTGCGACCCCGGCAAGGTGTGCGGCCACTACACGCAGGTGGTG…
>Zm00001d029590
ACCAAACCGCCCCGCCGAGCGACCCAGTCCGTCAGCGAGCACCCCTGTCGCCGAAGCCCAGGCAGCAGCAGCGGGCAGGGGCGTCCGTCCGGTCCGCGCGCGTTCGTTCCCCTCCCCGACCGGCAGATTCCCCGTCCACGCCCCCGCCTTAAAACGCCCGCCACTAATCCCGTTTCTCACTGCCCTTCCGCGGCTGTGCTGTGCTCTGCTCTGCTCTGCTCCCCGTCTTTCCTCCTCTCCCGGTCTTTCCTCCTCTCCCCTTCCCGCCCAGCGCGTCCCCACGAGGAACCAACCCCGCGGCATGGGGATCGTGGAGGAGGCGCACAACCTGCGAGTGGTGGGCGAGGGGAAGCGCGGGGTCATCGTGCTGGCGCACGGCTTCGGCACCGACCAGTCCGT…
>Zm00001d029648
ATGGTTCTTTCATCGTCTTGCACAACAGTTCCTCACCTTTCTTCCCTTGCGGTCGTTCAACTAGGCCCATGGAGTTCCCGCATCAAGAAGAAGACGGATGCAGTCGCCGTCCCCGCGGCCGCCGGCCGGTGGAGGGCGCGGGCGCGGGCCCAGGACACCAGCGAATCCGCCGCCGTCGCCAAAGGTTCGTCCCTAACGCCCATCGTGAGAACCGATGCCGAAAGCCGCCGCACGAGATGGCCTACGGACGACGACGACGCTGAGCCGCTGGTCGACGAGATCAGGGCAATGCTGACGTCGATGAGCGACGGGGACATCAGCGTGTCGGCGTACGACACCGCCTGGGTCGGTCTTGTGCCCAGGCTGGACGGCGGCGAGGGCCCGCAGTTCCCGGCCGCC…
>Zm00001d029722
GGAGCAGGCGGGGGCACGCGAATCACGGGAGTGGAGCCACGGTGGTGGTGGACGCCCTCGTTAGTGTCTTATAGAGTAGTAGAGATAGAGATTGTAGGCGTCCACAATTCCCAGTGGCGCACGGTTCTGCTGTCCCTCCATCCTCCCGCGCTCCCTCCGTGCTACATCAACGCCCGCAGGTTCTGCCTCTCCCTGTCACTACGCCGCCTGCCCCCGCCGCACCCCTCCCCGTTACTAGGTGCGGCGCCGCGCCGCGCCGCCTCCTCGGCCTCGCCTCCGCGCTCGCCGACGACTCGTCCTGCTCCGACCTCCTCCCGCTGTTCCCAGTCCCCGCCGGCTACGCCGCCTCTGACGCCGCGGATCCCCGATGCCGAGAGCTGCCCGTCGCCCGCTGCCGTC…
>Zm00001d029784
ATGGCCGTGGGGTTCCGTCGGACGCTGACCACGCTGGCGTCGCCCAAGTCGATGGCTCCGTCGTTCCTGCTGGACTGCGCGCGGCCCAAGAAGCTGTCGTACGCGCGGGTGCGGTCGACCAGCCTCCCCGTGCGGCTGCACCCGCTGGCGGCGGCGCTGCACGAGTCGGCGCGCGCGCTGCTGGCGTGGGCGGACGCGCCGGCGCAGACGGGGCCCGCGTGGGTGGCGGACGGCGCCGGGCGCGCGGGGCGCGTGCTGTCGGGGCTGGCGGACCTGCTCCACCACCCGCAGGCCCGCGACGCGCTCCGGCGGCACCCCTGGACGACGGAGCAGCTGCTGGACGACCTGCTCCTGCTGGCCGACCTCCACGGGTGCTTCCGCGAGTCGCTGGTGGCGCTG…
>Zm00001d029806
ATCATCACTGCCATCTCTCTCTGACTCTGTGTCCGTCTCTAAACTCTAGTCTGTGCGAATCTGCTGCCAGCAGCGAGGAACAGAACAGTAGCCAATTTGCCATCTCACAGTTGCGTTCCTCCGATTCCCCGTCCCCCGATGGACCTGTCTCCCAGCTCGTCGGCGCCATCCGCGCCGCCGGTGCCGTGCGAGTGGTCCGGCGCCGGGCTCGGCTCCGCGGCGTGCGGCCTCGCCTGCAGGGTGCTCTGCGCCGTCGCCACCTGCGTCTTCGCGGCCGTGGGGTCGCTGGTCGGGGCGGTGACGGGGTCCATGGTGGGGCTGGCGACCGAGAGCGGGATGCTGCGCGGCGCCGGCATCGGGGCCATCTCCGGCGCCGTCTTCTCCATCGAGGTCGCCGAG…
>Zm00001d029822
ATGCTCGCGGGCCTGCTCGTGGAGCTCCACGACACCACCCGCCTCGTCGCGTTCGTGACCGACCAGTTCGGGATAACCTTCTTCACCGCTGCACATGACGCCAGCGTGACCGCACGGTGCCTCTTCATGCCCATGAACCTCCATGCGCTCTCACTTGTCCTCCACCTCCCCGAGCAGGCCTCCTTCATGCCCGGCGAGTTTCGGGACCTTGCCGAGGCGGTAAGCAGTGTACAATTACGTGATGATCTCTTGTCAATGTTAGTTGCTGGTCATGAAACAACAGGCTCTGTACTGACGTGGACAATCTATCTTCTCAGTAAGGATCCGACTGCACTGAGGAGAGCTCAAGATGAAGTAGATCGTGTTCTACAAGGTAGACTACCCAAATATGAGGATGTA…
>Zm00001d029847
CTGCGTGTTCCTTATGCCACCGGACGACAAGGAGGAGCTCTTCTAAACCGAGGCTCTTCACGGCGAACTCTTTGCGAAGAAGATGGCGGCAGCGGTGGTGGATAAGGTGTTCGTCGCGCTGCCGGCGGAGGTGAAGGCGGGGCAGTCCACGCTGGCGTGGGCTCTCGACCGTTTCGGCGGCGGCGGCGGCGGCAGAACCACGGTTGTGATCGCACATGTGCATGTCCCGCCACAGATGATTCCAGTGATGGGGGTCAAGTTCCACTCTAGTAAACTGAGCCCCGAGCAAGTGAAACTGTTCAGAAGGATTGAGCATGAGAGGGTGGACAAACAGCTAGACGGTTATGTTCGCCAGTGCTCAAAAATGAAGGTCAAATGTGAGAAACTAGTTTTTGAGAA…
>Zm00001d029849
GCCGAAAGGGAGAAGGATGGACAGCTCAGGGCTGCGGGCTCCGGCGCCGGTTCACATGGTCGGGGGATGCTGCGAGGACTGAAGACTTTGGATGGGTGTTGCGTGTGCTCATCCCACCGAGCGAGAGGGAGAGACGAGTCAGAAAGGCCCGCCCGTGAAGCTCCATCCCGTTCTTGCCCAGTGTTCATCAGGTGCAGCTTGCGCGGATCCCCCTCATGAACTGAGCAATCGATAGAAGAAACAAAAAGGGCCATTTCCGCTACAGAAAATAAATCATCAGGAATGGGAAAACGAGGCCACAGGCGGTCTGCATCACAAGACGACGACAATGTGGGCTGTGTGTGGGGCCTCATGCGCATGCTTTACTTCCGCCGAGACCCCAAACTTTTGCTGGATGCG…
>Zm00001d029940
ATGGCCATGTTGCGCGAGCATCTCGACCTCATCCGCGCTCACCTCCTCGACGACAACCACGACGCCGTTAGCTCCGATGACTCGGCGCCATCGCCATCCCCATCGCCGCCGGGGCGTAGGCCGCTGCCAGCGCTTTCCGTCTCGCTGCCCCCGAGGCCGGCAGTCGTCCTGCAGCAGCAGCACCTGAGGGCGGCGGCGGCGCCGTTGCAGATTCCTCAGCAGGAGCAGCACTGCTGCCCGGAACCCGAGGAGGACGATTTCCGGCGGTACCGCGGCGTGCGGCAGCGGCCGTGGGGCAAGTACGCGGCCGAGATTCGGGACCCGGCGCGGAAGGGCGCGCGGGTGTGGCTGGGCACCTACGACACCGCCGTGGAGGCCGCTCGTGCCTACGACCGCGCC…
>Zm00001d029997
GTGCAAAAACAGATAAGGGACGGCACGCGACGCAACTATCCTCTAGAGAGAGAGAGGAAGCCCGTCGTTCTGGAAGTTTCCACGCTCCGCGCCTCCGCCCCCTGGTCTCCGCTCCAATGGCGCCCTCACTCCTCGCCGCCATGTCCACCTCGCCCTTCCTAGCCAGCAGCGGCAGCAGCCGCAGGCCGCTAGGCGCTGCCCACACCCGACGGGCTGGACTGCGCGTGGCCGCGCTTAAGTACGACCCTGCCAAGGTGGCGCCGCAGAACGACCGGGTTCTCGTCCGTCTTGAGCAGATCCCTGAGAAATCTGCTGGCGGTGTATTGCTACCAAAATCTGCTGTTAAGTTTGAGAGATATCTGATGGGTGAGATTCTATCGATCGGTGCTGAAGTCAGTG…
>Zm00001d030090
ATCTCCTCTCCTCTCCCGGCTCGGAATAACCCGTCTCTCTCGCCCGCCCTGTCCTTGCCGGCCGGCCCCGGCCCCGGTCTCTTCTCTTCTTCTTCTTTTTCTTCCCGCTATATATACTGCGCGCCTCACCTTCCCCTCTTTGCAATCCGTATCATCATCTTGGCCTCGTCAATCCACCACCACCGTCGTCGCTGAGCTCCTCCTCCGGCTTCGCTTCGCTGTCTTGCCTCCTCCTCGGTCGAAGAAGAAAACATGTGTCCGGGATCCGTGGAGTCGTCGTCGGCGGCGGCGGCGGGCAAGAGCGTGTGCGTGATGGACGCCGCGGGGCCGCTGGGCCACGCGCTCGTGGACCGCCTCCTCCGGCGCGGGTACACCGTCCACGCCGCCACGTACGCCCGC…
>Zm00001d030114
GGCCATGCAGATGTCGTCCGAGGCGTCGAAGGTGGCGGTGCCGGAGTCGGTGCTCCGCAAGCGGAAGCGCGAGGAACAGTGGGCCACCGAGAAGAAGGAGAAGGCTCTGGTCAAGAAGAAGAAGTCCATCGAGAGCCGCAAGCTCATCTTCACCCGTGCAAAGCAGTACGCCGAGGAATATGATGCCCAGGAGAAGGAACTGGTGCAGCTTAAGCGCGAGGCCCGTTTGAAGGGTGGTTTCTATGTCAGTCCTGAGGCAAAGCTGCTCTTTGTGGTCCGCATCCGGGGTATTAATGCCATGCACCCTAAGACCAGGAAGATCTTGCAGCTTCTGCGATTGAGGCAGATGTGTTCACTAATGTATATCTTCAATGGCGTGTTCCTCAAAGTCAACAAGGC…
>Zm00001d030339
ATGGCGCGCCCCCAAAACAACCAGAACCCCAGGGTGTTCCTGGTCCTCAACATCGGCGGCGTGACGGTTGGCCGCGTCGTCATCGAGCTGTTCGCCGACAAGGTGCCCAAGACGGCGGAGAACTTCCGGCTGCTGTGCACCGGAGAGCGCAGCGTGGGGAAGTGGTCCGGCAAGCGCCTGCACTACAAGGGCGCGGCGTTCCACCGCGTGGTGCCCGGGTTCATGTGCCAGGGCGGCGACATCACGGCGGGCAACGGCACGGGCGGCGAGTCTGCGATCGGTGACGCCCGGTACTTCGCCGACGAGGCGTTCGGAGCCGTCCGGCACGATGGCGCCGGCGTGGTGTCCATGGCCAACGCCGGGCCCAACACCAACGGATCTCAGTTCTTCATCACCTTC…
>Zm00001d030346
ACACAAGACATCCTTACATTTTCTTGCTGATCACAGCTAGTAGGGAGCGAGAGTTACCTTGAAATCAAGGCAGTACGTACGAGTACGATCGACAATGTCGACGGTCACTTCTTGCACCTTTCTGAGCCTCGGGTCCCCAGTGCGGCCGGCAGTCTCCTCCGCGAGACCGGCGGCGGCGGCGGTGGCTTCCCGACGGAGGCCCCGGTCCCTTTCTGTGTGCTGCGAGGCCGGCCGGAAAGGGGATCACAACCCAAAGACGGATCTGCATCCATTTAACATCCCTGCCTTCGTTCTGGTGCACCCGGTGGCACCACGTGAGGAACGGTGGCAGCTGGAGGAGGACGCCGACAAGGTGAACCTGTGGTTCGAGGTGCCTGGGCAGTCCAAGGATGACCTCAC…
>Zm00001d030551
GCCGAATGAAGAATTAAAAAGCCCCCCTAAAACTGCAGAAAACCAGGGAAACCCGAGAAAATCGAGTATACTGAAGCCATCGAGAGCAGCTTTCTTGCAACTCCCATGGCCCTATAAGGCAGAGAGAGATAGAGCAAGCGAGCGGGGAGAAGAGATTGAGCATTGCTGGTGGCCCTGTGCTTTGAGAGAGGAGAGAGGACTTGAGGAATAGGCAGGAGGCTTTGTGGTGGAGCAATGGCGACAGCGGCCTGGGCCGCATGGCTGCTCATCCTCACGTGCTTCGGCGCTTGGACCCCGCGGCAAATCTTGGTTGCTGCAGCCACCGACGCGAATGATGTTACTGCCCTCAACACGCTGTTTACCAGCATGAATTCGCCGGGACAGCTGCAGGGCTGGAAG…
>Zm00001d030683
AGAATTCACTCTGCCTTTCCATTCCCCCATCCGCCATGGCGGCGCCGCCGGAGCTCGTTGACGACACGATCGCCGAGATCTGCCTCCGCCTTCCCCCGGACGAGCCCGCGCACCTCGTCCGTGCCGCCCTGGTCTCCAGGCGCTGGCGCCGCATCCTCTCCGGCGGGGCCTTCCTCCGCCGGTACCGCGCGTTCCACGGGGCACCCCCTCTGCTCGGCTTCGTCGACAACACCATCGGGCTCCACGGCGCCACGGCCCCTCGCTTCTCCCCCACCACCTCATCCGGCTCCCCTTTCCCCAGGCGGACGTTCGACTGCATCTGCTGGGAGGCCCTCGACTGCCGCCACGGCCGCGTCCTCCTCGGCCTCTTCGCCGAGAGGGTCAACCTCGTCGTGTGGG…
>Zm00001d030685
TTCACTAAACTGTCGGGTGGACTAGAAGGTGGTTCTGTCCCTCCAGCATTCCAACGAGCTGAAAAGAAAAGACTTGAAGCTGCTAAAAGGGCTGAAGAAGCTGCAGCAGCTAAGGAGGCAGCGCTGGAAGAATCTCTTTGCGACACACAGAATTCTGAGGTTGAGAGTGCCATGACTCCTAGAAAGGACAAGCCTCAGCCGCCACCTGAGGGCCGTCTTCCTGATGCCACCAAGGGTTCTAACCACCTGAGGCAAGTCTTTGGCAAGCAGATGGGTTTGAGTGATCAGGACATCGTTGCCCTCTCTGGTGGCCACACCTTGGGAAGGTGCCACAAAGAGCGGTCTGGTTTTGAGGGGGCCTGGACTACGAACCCTTTGGTCTTTGACAACTCTTACTTC…
>Zm00001d031037
ATGGCCACGCTGCTGCTGCAGCAGGCGAGCAAGAGCCTCGCGTCCGCCCGGCGCGGCGGCGTGCTGGAGCAGAGGAGCGTCAGGGACCTCATGTTCGGCGGCGCGGACGAGGAGATCATGGTCCTGCACGCGGAGCTCCGGGCGGCGGTGCAGGGCGAGGAGAGGAGCCGCAAGGCGCTGGACGACATCTCCGCCGCGCTCTCGGACGTGACCGCGGAGGCCAGGCTGGTCAAGGCCTGGCTATCCGAGGCACAGGTTGAGCTGGAGGCCACCAACGCCGAGGCCATCCGGCTGCGCGCGGCGCTGCGCGCCGCGTCCGACGAGCGCGACTGCTACATGCTCGAGACATTTGGTTGTCTAGCTAGCTCATCTGGAATTTTATCATTGCAAGCAATCTGT…
>Zm00001d031113
ATGGCCGCCGAGGCCAGCATGGAGCGCGCGCGCGACGGCCGGCGCCACGAGCACCAGCAGAAGCAGCAGCGGCGCAGCCACCGGCGGTCGGCTTCGGCGTCCGTGACCTCGTCCACGAGGCAGTGGGCATCAGGGTCGGCGTCTGCGTCGGCGTCAGCGTCTCCGTCCCAGGCGGCGGCGGCGGCGGCGCAGGAGTCGGAGCGGCGGCTGCGGCGGTCCCCGCCCGTGGAGGCGCGGCGGGAGCGCGAGCGGCGTCGGGCGCGCGAGCAGCCGCGGTGCGGGGAGGTGGCGGGCGGGACGGCGGCGGAGTGCGCCGCGGTGTGCTGCTGCTTCCCCTGCGCGGTGGTGGAGCTGGTGGTGCTGGCGGCCGTGCGCGTGCCCGCCGCGCTGTGCCGCCGC…
>Zm00001d031129
ATGGACCGGCGGCAGCGCGCGGCGGCGCGGGTGTTCGAGGACTTCGACCCGGAGGTGGAGTGGAAGCTGGCAGGGGAGGAGCAGGACGTGGTGGAGATCGCGCTGCCGGGGTTCCGCAAGGACCAGGTGAGGGTGCAGGTGGACAACCACGGCGTGCTGCGCGCCACCGGCGAGCGACCCGCCAGGGGCGGCCGGTGGGCCAGGTTCAAGAAGGACCTCCGCCTCCCCGACAACTGCGACTCCGACGGCGTCCGCGCCAGGTTCGAGGGCGAGAAGCTCATCATCACGCTCCCCATCGTCGCCGCGCTGTCGCACTCGCCGACTCCGTCGCCGTCGCCACCTCCTCCTCCTCCACAACAACAACCACGCCGGCGTCCATCGCCGCCAGAGCCGTCCGTT…
>Zm00001d031212
ACTCGCCACTCTCACGTCTCGCCCATCCCGCCACTGCTGCTCTCCAGAGTCCAGGCGACCCAGGCTGCGCGGTCGCTCGGTGTTGTTAGTCCCGACCGCCGCCGGCCATGGCATCCAACGGCATCGCCCCAAGAGATGTATGTGTTGTTGGCGTTGCACGCACCCCTTTGGGTGGTTTCCTTGGTGCCTTGTCTTCCTTGCCCGCAACAAAGCTTGGTTCTATAGCAATTGAAGCTGCTCTGAAAAGAGCAAATGTGGATCCGGCCCTCGTGCAGGAGGTCTTTTTCGGAAACGTCTTGAGTGCTAATTTGGGACAAGCTCCTGCAAGGCAAGCCGCTCTGGGTGCAGGGATACCAAACACTGTTGTTTGCACCACTGTTAACAAAGTCTGCGCATCTG…
>Zm00001d031241
ATACTTTAGTGGTGATATGTCCTCTTGTTTGAGTTTGGACGACGAGTCAAGAAATACCTTACAGAAATATATAGGAGCAGAAAGAATCTTGCCTTCCATGTCCAAGGTACTTGTTATGTCTTATCAATTTTGCTTTGAATGTTGATTTTTGGATGGCCGATGAAACTGGTCCTTGTGGGCCATGTATTGGTTTTTTCCATGATTGTTCGGACAACAATGATGGTGTTGATTCCGTAAGGAACATAACGAATGCCAAGCTTGTTGAGATATGCCGTCTTGTGTTTGTTGAGGTTGGTTTTCTGTTCTTTTAAGATCTTTTGCATGCGAAACTTCTCAGCTGTTAAGTTCTATTGCTACACAATGTCTCTGCTTTACTCATATCTTTCCTTCATTTTTAGT…
>Zm00001d031257
ATTCGAGAGGAAAGGAGGAAGAACTGGAGAGGAAACAAAAGTGTAGGATCGAGGGAGAGGGAGAGCGGCCAAGCGTGGACCAACGACTCCTCTTCTCCGATCCTCCCGCAGCTGCAGGCCGTAGCTAGCTCTATAAAAAGCTAAGGGAGCCTGCCTGCCATCGTCGTGCATCGTCATCCACCACGATCGATAAAGCTAATTAAGCTGCTACTGCTACGCTAGCCTCGATCGATCAAGCAAGCAGCTCACAGACCCACCGGCCCACCCACCCACCCACATGGCGGCGTCCCGTTCCGCTCTGATCACGCTGCTCGTCCTTGTGAGCTCCGTCGCGGCGGCCTCGGCGACCACGTTCACCGTCGGCGACAGTAGCGGCTGGAGTCGTAGCGTCAACTACGA…
>Zm00001d031449
ATGCATCTCCAGCTCAAGCCGTTCCGCAACGCCGCCCGTAGCCGCTGTAGCAGAGCAGCACCAGCGCGAGGTCCTGCTGCAGGGCTTCTCTTCTTCCCCGTCGCCGTCGCCGCCGCCTCCTCCTCCTCCCCCTCCTCCTCGCTGAGCAGCCGCCCGTCGTCGTCCCTGGTCCAGCTTCGGCGCTGGTCGCGGAGGAAGACCATAGGGTGCGTGGCGTCGTCGTCGTCGGCGCGGTCGGAGACGCCGAGCAGCAGTAGCGGCGCGAGCGCTGCAGCAGCGTCGACGTCGGCCATGGCGGAGGCGCGTGTAACGGCGGTGGCGACGATCAAGGTCACCGCCGGCGGGTTCCTCAACAGCTTGAGGCCGTCCAGGGCCATCGACGACATCAAGGACCTCATC…
>Zm00001d031503
TCATTTTGCTTATATCATGTAAGTTCACTTTCAGGTGCTGAGTTCCTAGCAAAAGATCTTGGTTTGTTGGTTGAAAATGCTACAGAGGAACAACTTGGCACAGCAAGGAAAGTCACGATACATCAGACTACAACAACCCTCATAGTAGATGCAGCCAGTAAAGATGAGCGTCTTGGCGCTGATATTATTCAAAAGAGGTCCAATGTTGTTAATATGTTTATTTGTGCTGTAGACACATATACTGGATCCTTTAGAGCAATAAATCACGTTTTTACATTATCTTCTCTACTTGTGCAGGCGTTGGTAGCACCTGCTTCATTGATTGCACACAATGCTGGAGTAGAGGGTGAAGTGGTAGTCGAGAAGATCAAGGAGAGCGATTGGGAGGTGGGCTACAAT…
>Zm00001d031555
CTCTTCAGCGCCCTGCGCCCAAGCTCCAGCTCCGATCCGTAACCCAAACAAACGACACCTTGGGCTTGGAGCCTACTGTGCCACCGGCCCGCCCACGAGACCCCGCGGCCATGTCCATCCCGCGGCTCCTCCTCCTCGCCGTCCTCGCCGCCGCCGCTGCGTGCGCGCCCGCGCACGCCGCCGGCGCCGGCGCCTGCGCGGCGGAGAAGTTCTCGGGCAACCGCGCGTTCGCGGCGTGCGCCGACCTGGCCCGCCTGGGCGCGTCGCTGCACTGGTCCTACGACGCCGCGGCGGCGTCCCTGTCCGTGGCGTTCCTGGCGGCCCCGCCTTCCGCGGGCGGCTGGGTCGCCTGGGGCCTCAACCCCAGGGCGCAGAGCATGGACGGCACGCAGGCGCTGG…
>Zm00001d031685
GCCCCGTGATCCTCTCCCCCTCGTCGTTGTCGCCCGCCCTTCCATCCACGCGCCGTGCCCCCATCCACGCTCTGCATCGACCCCCTTCCATCGGCGCATACGATGAGGATCCACATCTGCCGCGCCCGTTCGTCGTCGGCGCCCCACATCGATCCCCGCGCATCGTCGGTGCCCCCCTCCATAGTTGCCGCGACTGCTACCACGCGCCCCCGCCAGGAGGAGACTGACGAGGCGGCGCCGCGCGCCCCCACATGTCGCCCGTCAAGTTCACCATCCCCGCCCCGCTCGCCCCTACCGCGAACGCCGCTGCCGCCCATCCTCGCGTCCTCCCCGTCTTCAGCGCCTCCCTGCCCCCGTCATCGGCGCCACAACCCCCCCGGCCTCCCCAGCCTCGGCGTG…
>Zm00001d031801
ATGGCTTCCCCTGTCCTGCTCGTCGCCGCGCTCTGCTCTCTCTTCGCGCTGCTCGGAGCGGCGGGGGAGCCGGCGAGGGGAGCGGCGGCGGAAGCTTCGGCACTCCGCAGCAAGGCGGCCACGGACCCCAACACGGAGGTGAAGTTCGACTTCACGCCGTTCCTGATCCAGTACAAGAGCGGCCGCGTGCACCGGTTCATGGGCACGTCGTTCGTCCCGGCGTCCGTGGACCCGCGCACCGGGGTGGCTTCCAGGGACGTGGTCGTGGACCACGGGACGGGCCTCGCGGTGCGGCTGTACCGGCCTAGCCGCCAAGCCGTCGCCGGCGGCGCCGGCGGCAGGCTCCCCGTGCTGGTGTACTTCCACGGCGGCGCGTTCGTGGTCGAGTCGGCGTTCGAC…
>Zm00001d031813
ACCACAACGCACCACACAAAGCGCAGCAGCCCGCCCGAGAGACAAGCAGCCAAATCAAGCCTTTATTTACGATCCGGCCGGCCGGGATCTAGACCACCTCTCTCTCCTCGTACGTAGTCGTTGAGTCTTTGAGGTCAATCGAGCGAGGTAAAATGGCGCCCGTCTACGCTGCCGCGGACCACGGCACCAACGGCGGCTCCGGCCTGACCCTGAACCCGGTGGCGCGCCGGGCGCTCAGCCTCGTCGGCGCGCCCACCACGCCGTCGTCGTCCACGCCGCCGGCGTACGGGAGCATCGTCACCGTGCTCAGCATCGACGGCGGTGGCGTGCGCGGGATCATCCCGGGCACCATCCTCGCCTTCCTCGAGGAGAAGCTGCAGGAGTACGACGAGCGACCGG…
>Zm00001d031878
ATGATGAGATCCGGCCTTCTCTCGCTATGTTTCCACCTAGCCCTGGCCATCACACTGGCTGCAAGTGTTCCTGGCCTTGCTCGTAGTAGGGTAATCGACATCGAACCGCAACTCAAACCGACGCTGCAACTAGAACCAAAGCATGGTGTATCTCAACCAGACAGAAACCAAGAACCCAAACCGACACCACAACCTGAGCCAAAACCGGAGCCTAAACCGGAACCAAAACCTGCACCACAATCAGACACCAAATCAGACCCTAAACCCGCACCACAGTCAGACCCAAAACCTGCACCACAACCGGACCTAAAACCAGAACCCAAACCTACACCACAGCCAGACCCAAAACCTTCACCACAACCAGACCCAGAGCCAAAACCCAAGCCAGCGCCACAGCCT…
>Zm00001d031934
ATTGCCTATCAACCGCTACTCACGCCGTACTGTCTGATCGGCAACACCTCGTGTACACGTAGGCCCGGAGATATGGCGGCATCGCCGGTGGCCATCGGCACGGCGGTGTTCCAGCGGGGGCCACTCCGCGTGGAGGCGAGGCACGTCGACTACAGCCAGGTCCCCAGCGTGCCCAAGCCGCTCATGGTGGTCGCCCCCACCGACGCCGGCGTCTACCCCGTGGCCGTCTTCCTGCACGGCTGCAACACGGTCAACAGCTGGTATGAGAGCCTCCTGTCGCACGTCGCGTCCCACGGGTTCATCGCCGTGGCGCCCCAGCTCTACTGCGTGACGCTCAACATGAACGACTTGAAGGACATCGACGCCACCAGGCAGGTCACCGCCTGGCTCGCCGACAAG…
>Zm00001d031949
ATGTGGCCGCTGTTGGGGACCGTCGCGTCCGCGCTGGCGGGAGATGGGACGGAGGAGGAGGAGCGGCGGCGCGCGGGCAGAGGAGTGCCGGCGGCGCGCGCAGAGGAGTGCAGGCGGCGCGGCTCAGTGGAGCACGGACGACGGCGCAGGGGCCGGCGGCGGTGGAGCGGCGGCGCGCGCAGGAGCGCTGGTGAAACCTCTGCTGATTGGGACAAGGCATGGTCTGCCTTCAAGAAGAAAGGGAAGAGGACCCTGTTTTCTGATTTCTCACCGGACAAGTACGTGACCTGGAACCCACGGCGCAGCGAGTATCCATTGTCAGAAGAGGTGGATCCAATCAAGAGAACTGAAAGATCTAACTTGATGCTGTGGACAAGCCCCCAGTTCACCTTGGTCGGG…
>Zm00001d032016
GCCTACGCTCCCACCGCGTGTCCGCAGCTCTGCCCCACCTCACATCTGCGCCCGCAATCCACGCCTCCGTCGCCGCAGCCCTTCCTCCACGCAGCGTCCGTCCATCCATGGCTCTCCCTACACGCAGCGTCGTGCCGCTTTCCGCAATCCGTGCCTTAATCCCCTTCCTTCGCGCAGCACCCTTCCATCCATGGCTCGCTTCCAGAAATCCCCCTACCTACGGCGCAGCGTCGCAGTCCGGAATCCACCCCCAAAATCACTACCCACTCTGCGGCGATGGAAGGGAATCGAAACGCGTGCTTCCCCCTTCCATCCTCGGCGTTGCGCGGATTGCATGGCCATCGTTTCGCGCCCCCAATCCGTCGATGCAAGGAACACGTGCTTCCCCCTTCCATCCTC…
>Zm00001d032046
TTTCCCCCTTTGACACAGCCGAGCTCCCCTCCATCAGCAGCCAGCTCCTCGTCGCAAAGCAAGAAGATGATGCTCGCGTACATGGACCGCGCGACGGCGGCCGCCGAGCCAGAGGACGCCGGCCGCGAGCCCGCCACCACGGCGGGCGGGTGCGCGGCGGCGGCGGCGACGGATTTCGGCGGGCTGGCGAGCGCCATGCCCGCGGCCGTGGTCCGCCCGGCGAGCGCGGACGACGTGGCCAGCGCCATCCGCGCGGCGGCGCTGACGCCGCACCTCACCGTGGCCGCCCGCGGGAACGGGCACTCGGTGGCCGGCCAGGCCATGGCCGAGGGCGGGCTGGTCCTCGACATGCGCTCGCTCGCGGCGCCGTCCCGGCGCGCGCAGATGCAGCTCGTCGTG…
>Zm00001d032069
GTCTCGCTCAGCAGCTCTCTCCAACTCCTTCGATCCCTTCCCTCCTCTCGCCGCCGGCCGATTCACTTCTTCCATCATTCGATTAAGCAAGCAAAGGCAAGGCGCATTTCCCTCGGGTGACTCGATCGGCCGCACGATGTCTGCGACGCAGCCGTGGAGGTCGCTTTTCTGCTGCGCGGCGGCGGGATACGACGACGCCGACGAGCCACCGCCGTCGTCGCGGGGGCAGAGGAAGGGCCGGAGCAGGAGGGACCGGGACCGGGAGCGGCTCCAGCTGCTGCTGCTGCCGTCGTCCTCGTCGGCGGCGTCGCGGGTGTCGCTGTCGAGCCTGGGGGGCTCGTCGGGGACGCTGACGCCCGAGGACCTGTCCCTGACGCTGTCGGGCTCCAGCCTGCACGC…
>Zm00001d032090
ATAATTATCATTTTTCAGTCTGGCATTGTAGGCACATGATATACTAATTAAAGTTACTAAATGAATATTATATTTGTACGGTGGATGCAAATGTTAAGCCTTAGTGATTTTCCTGTGTTTAATTCTCAATACATTTTTTTTCTTGACAATCAACATGCGACTGTGCAAAACATATGAATATAACATTTTTTATTGCAAACTGTAGCTTGGCTTCGATTCTTTGCATTTTGCAAGAATCGATTACCAAGATAAGAAAAAGTGTAAAGCTGGCAAAGGCTTAGAGGTTATATAGTGTGGCTCAAGAACTTTTGGTTCATCTTCACAGGTTCTTATTCTTCTTACACCACAATTAGTTCTGTCTATTCCATTCATTAGCACAATGGATCGAATTTTGATTTT…
>Zm00001d032131
ATCTTTAGTTCAGTCGTGCCACCACAAGCCATTTAACCCATCCGCAAACAGGCACCCACGGCCCATCTTTGGTCCAGTAAATTCACCTTTCTACCCCGATCAATTCACACCATGTCGACCACAACCCTAACCCTATCCCTTTCGACGGTTCCACTTGCACCCTACCCACAACCCCATCCATCGTAACCCGCCGCCGCCGCGATACACGCAAATCCTGCCGGCGCATCCAACCCCGCCCGACGTGGACGCCAGAGAGGTGCACGACTTCCGCAACTCGTGGCACTCAGTGCGGTGGTCGTCCAAGCTCGTCCTCTGGCTCGTCCTCAACGCCTTCAGCTTCCTCGTGCCGTCGCCGCTCGCCCAGATCTACGATGCAATGGTGAGTGGCTCTGTGAGGAG…
>Zm00001d032144
CCGCTGCTCACCCCGTCCTAGACGCGAGGCGACGACGCCTCCCTATCCCTCTCCTCCGCAATGGCCAGGCCCCGCAAGAACGGCGGTACCGACGAGGATGATGCTAACGCCGCCACGGGAGCCACCGGGAAGCCGAAGAAGCTGATGAAGCGGGCGCGGAGGAAGAGCGAGAGCCCCTCCCCGCGCAGCTCCGCGTACCGCGGCGTCACACGGCACCGGTGGACGGGGCGGTTCGAGGCGCACCTGTGGGACAAGGACGCCCGCAACGGCTCCCGGAGCAAGAAAGGCAAGCAAGGCGCGTACGACGACGAGGACGCGGCGGCGCGCGCGCACGACCTGGCGGCGCTCAAGTACTGGGGCCCCGCCGGCACCGTCCTCAACTTCCCGCTGAGCGGCTAC…
>Zm00001d032204
ATGCCCGCCGCCATGCCCTCTCCGCCGGGCCGCCTCCTCGCTTCTATCCCTCTCCGCTGCCACGCTCCGACCCAGCAGCCCTCCACCACCGCCGCCCGCGGCCTCCTCCTCCGCGGCGCGTGCTCCCCGGTTGTCAAGCGTGTCCCGGACGGTGGCGGGTGGCTCCTCTGGCACCAGTCCGGCCCCCGCGTGGCGCTCTCCACCTCTATGGACGGTCTCCGCTGGAGCGCCCCAGTATCCCCCGACCCACTGCTACCCTCAGAGGATTGGTGGACGTTCGATACCGCCTGTGTTCGCCCCTCCGACGTCCTTCTCGTCTCCAGCCCCGCGGCGTCATCCCGCCGCTTCCCGTCCTCTGCCGTATACTGGCTCTACTACATGGGCTCCACCGACGAGCGG…
>Zm00001d032222
ATGGGGTCGGTGCCGCCGGCAGAGGGGGACAGGCGCCAGCCCCAGCAGCAGCCACACGTGGTGATGATCCCGTACCCGGCGCAGGGCCATGTCACGCCGATGCTGCAGCTGGCCAAGCTACTCCACACACGCGGATTCCACGTCACCTTCGTCAACAACGAGTTCAACCACCGTCGCCACCTGCGCGCGCGGGGGCCGGGCGCGCTCCACGGCGCGCCGGGGTTCCGCTTCACCGCCATTGACGACGGCCTTCCGCCCTCCGACGCCGACGCCACCCAGGACGTCCCCAAGCTCTGCTACTCCACCATGACCACCTGCCTACCCCGGTTCAGGGACCTAATTGTCAGGACCAATGCCGAGGCCGAGGCCGAGGGACGCCCCGCCGTGACGTGCGTCGTC…
>Zm00001d032458
ATGGACGCCACGCCGACGCGGCTCTTCCTTGGCGCGCTCCTCTTCCTCGTCCCCGCCGCGCTCCTCCTCCTGCTCCGCGCGCGGGGCAGGCGCCGCCTCCCCCCGGGCCCGCCGTCCCTGCCGCTGCTCGGCAGCGTGGTGTGGCTCACCAACTCGCCCGCCGAGATCGAGCCCCTGCTGCGGCGCCTCTTCGAGCGTTACGGCCCCGTCGTGGCGCTCCGCGTCGGGGCGCGCTTGTCCGTCTTCGTCGCGGACCGCCGCATCGCGCACGAGGCGCTCGTTGACCGCGGCGCGACGCTGGCGGACCGCCCGGCGCTCGCGTCGGTCAAGTTCCTCGACGAGAGCGACAACACCATCACCCGCGCCAGCTACGGGCCCGTGTGGCGCCTGCTGCGCCGC…
>Zm00001d032480
GGTGCCCCAGCCCAAGTGGGCAAATTATTCCGCGTTGGCAGCCGCCCTCCTCCCCAAGGACCCCAACTTTCCAGTGCGGCACCGGCCTCCTTTACACCTCATTGCCAGTTTCCCACCGCCAGGCGCCAGCCACTCTCACGGTTGCCACCCTAGCACGCGCTCGCCGTCGCCACGCTCTATATCTCGCGCCTCTCGCCTTCCACTCTTTCTATACCCGCCCGCTCGCCTCCCTGGTACGCTTCGTGCCGCCGCCGCAACCTCCTCCTCCCCGTCACAGATTGCAGATCATTTAACATAAATGGCTGACTCAGAGGACATTCAGCCCCTAGTCTGTGACAATGGAACTGGAATGGTCAAGGCTGGCTTTGCTGGAGATGATGCTCCCCGTGCTGTTTTCCC…
>Zm00001d032527
TCTCATCACACCAAAGCCAGCAGCAGGCACGAGCAGCCTCCAGAGACCCAGTGCGTTCTCAGAGCCAAGCAGCTTGCAATATAATGGCGTCGTCGCTCAAGTTCACGGTGCGGAGGCGGCCCGCGGCGCTGGTGGCGCCGGCGTCCCCGACGCCGCGGGAGCTGAAGCGGCTCTCGGACATCGACGACCAGGACGGGCTGCGCTTCCACATCCCCGTCATCCAGTTCTACCGCCGGAGCGCGCTCATGGGCGGGCGGGACCCGGCGCCGGTGGTCCGGGACGCCGTGGCCAGGGCGCTCGTGCACTACTACCCGTTCGCCGGTCGGCTCAGGGAGCTGGAAGGCCGCAAGCTCGCCGTGGAGTGCACGGGCGAGGGCGTGCTGTTCATCGAGGCCGACA…
>Zm00001d032618
AACCAACTGAGCTGAGCAAGAAGGCAAGCACCAATCAGCCAGCAGTCCAGCACAATATCATGAACAAGCGTCAGGTCGCCGCGGCGGTGGCTGCCCTCCTGGCGCTGCTAGCCGCATCATCGACGGCCGGCGCCGTGACGTTCGACGCGACGAACACGGCGTCCGATACCCCCGGCGGGCAGCGGTTCGACCAGGCCGTCGGCCTCGACTACGCCAAGCAGGTCCTGTCCGACGCGTCCACGTTCATCTGGAACACCTTCGACCAGCCCAGCCCCGCCGACCGCAAGCCCGTCGACGCGGTGACCCTCGTCGTCGAGGACATCGGCGGCGTGGCCTTCACGAGCGCCAACGGGATCCACCTCAGCGCGCAGTACGTCGGCGGCTACTCCGGCGACGTCA…
>Zm00001d032703
GCCCCGCGACTGGTTGCCTCTCCGCCCCGACCCTGCCCTGAGACCGGAGACGACCGCGCCCCGCGGTGGCGCTGCGACCCGCGATACGGTGCATTGCTCTGTCCCTCCACCCCTTCCCTCCTCTCGGCCGGCCCGCGACGCAATGCGGGCCGCCGCCTCGGGCGGGGCAGCCTTGCTCGATCTGTTGCCGCCGTTCGCATGGCCCGGCGCTCCCTCGGAGCCGACGGGATTCGCCGGAGGTAGCAGCAGCCGTGGATACGCGCGCTCGCTTGCGCGATTTCAGCCCGGTGCCTGCGCAGCGGTCGCGGTGGATTTTCTATCCCGTGCTGTTGTTGCTTCCGTTCGGTGTTTTTCTCGTCTATTAGGATTCAGTTGGTTTCGTCAGTTTTGGGAGTAGGC…
>Zm00001d032790
ATGGCCACCCCCTCCACCTCCGCTCCGTCGCCGTCGCCGTCCTCCGCCTTCCCACTCACCACCACCACACGCTTCCCCCGCTCATGCTCCTGCCCCGTGCGAGCCTCCGCGCTCGCCGAGCGGCGGCGCACGCGGCGGCGCCGGGCGCCCGATGGTGGGGGCGCCGGTGGGGACCGCTCGGCGGCCGCCGGGGCGGTGGAGAAGGGCCTGCGCCTGGTCTTCCTCGAGCAGCTCGCGGAGCGCGCGAGGGCTGCCGACGCCACGGGCGTGGCCGACACCATCTACGACATGGTCGCCGCGGGGCTTTCGCCCGGGCCGCGCTCCTTCCACGGCCTCGTCGCCGCGCATGTCCTCGCTGGCAACGCTGAAGGCGCCATGCAATCTCTTAGAAGGGAACTC…
>Zm00001d032866
GCATATTTTCTTGACACTTGACAGCCACCACACACTAGAGAGAGAGAAGGAGAACGCGCGTCGTATATGGGTCAAGAAGAGGCCGTGGCAGCGAACGGCACCGGCACCGGCGTCGGCCGCGGCAGGCCGCACGCCGTGGTGATGCCGTACCCGCTGCAGGGCCACGTGATCCCGGCGGTGCACCTGGCGCTGCGGCTGGCCGAGCGCGGGTTCGCGGTCACCTTCATCAACACGGAGTCCGTGCACCACCAGATCGGCGCCGGCGGCGACATCTTCGCCGGCGTGCGCGCGCGGGGGGGAGGGACGACGACGGAGGAGCTGGACGTGCGGTACGAGCTGGTGAGCGACGGCTTCCCGCTGGGCTTCGACCGGTCGCTGAACCACGACCAGTTCATGGAG…
>Zm00001d032932
GGTGGATGTTCGGAAGCAAGCTTTGTCGACAGACAGATGGGGAAGGCGGGGCGGTGGCTCAAGAGCATCTTGGCGGGGAGGAAGAGCGGCGTCAGAGACAAGGCGCTGCGGCATCAGCAGCAGCAAGGCGACGCCACTCCGCTGCCGGCCGCGAGCAGCCCCCGGGAGAAGAGGCGCTGGAGCTTCAGGCGGCCCGCGACGGCGCCCACGAAGCAGGAGGGGAAGGCCAATAACGCGGCGCCGTCCCCGTTGTCGTCGCTGGAGCCGTCGGCGCGGGAGCTCGACCAGAGCGAGCACGCCGTGGCAGCGGCGGCGGCTGCCACCGAGGTGGCTCGTCTGACGGCTGCTGACGAGAGCCATCTGTCAGTCAGCTGCTGCCCCGTCGAGGAGGCGGCCGCC…
>Zm00001d032992
AGAAAATGTTCCTCGCAAAGTTTGGCTGACGGCACCCACCGCCCACAGAAGCGCACCTCTGTTCTTTGGTGTGTGGCCGTGTGGATTCAAAACCGCTGACCGGCCGCTTATTTAAGCCCTTGCCCCGCCGGTTTTCTCTTCTCCCGTCGGCGCTGGTCCACGCGGCTCCAACACCTGCCTGCCTGCCTGATTCTTACACCAACCAACCACGCGCGCCAAGCCGAATTCGTCTTCCACCGATCCGCCCCGCCCGTTTCCCATTGCTTAGCTTGCTATGGCGCAGCAGCAGCCGGTGCGGCGGATTCTGAAGGTGGCACCGCCGGGGAAGGGGGACGGGGAATCCTTCCCCACGGTGCAGGCGGCGGTCGACGCGGTGCCGCTGGGCAACCGGGCGCGCGT…
>Zm00001d033067
ATGGCACACACCGGTGCAGCAGGTGGCCCGGAGACGTCGTTGCCCCACAGCGGCGACCTGGAGCTGGAGCTGCCGCCGCCGGTGAACTGGCTCCGGCAGGACTCGCTGTACCGCGACGCGACGAGGCCAGCCCACGGCGCCCACCACCACGGAGGGCAGGAGAGCTGGGTGCGGACGCTGCGGCTGGCGTTCCAGTGCGTGGGCATCATGTACGCCGACCTCGGCACGTCGCCGCTCTACGTGTACGCCAACACCTTCAAGTACGGCGTCCACCACGAGGACGACGTCCTCGGCGTCCTGTCCATCATCATCTACAGCTTCGCCCTCTTCACCATGGTCAAGATCGTCTTCATCGCGCTCTACGCCAACGACGAGGGTGACGGTGGAACGTTTGCTCTG…
>Zm00001d033079
ACACATTCATCCATTCATCACCCATCGTGTGCTTCAGCTACTACGCATAGATATAATTAATTAAGCGCGGACGACGACGTACGTAACAGTATGGCTGCTGCTGCTGCTACTGTCGTCACACCATCCTCGCCTCGCTCCATGGCTGTTGCCGCCGCCATTATTGCCTTCTTCTTCGCGGTGACCGCGGCGGCAGCGTCGCCGGTGCCCGCGATCTACGTGCTCGGGGACTCCCTGGCGGACGTCGGGAACAACAACCACCTGGTGACGCTGCTCAAGGCCGACTTCCCGCACAACGGCATCGACTACCCGGGCCAGAAGGCCACCGGCCGCTTCAGCAACGGCAAGAACTCCGTCGACTTCCTCGCCGAAAACCTGGGGCTGGCGACCTCGCCGCCGTAC…
>Zm00001d033152
AAATGGATTGAGCTCGATCCAAACAGCCGGTTGTGGCCAAATGGGTATCGAAATATTGTGCCTAATCTTCATCTTCCTCCTCCTCATCCGCGTGCTCACCAGGAGCTACGCCGCCTCCCCATCGCCGCCCACCATGTCCGCGGAGGCGGCACTCCGGCTGCCACCGGGGCCATGGCAGCTGCCGCTGATCGGCAGCCTGCACCACCTCCTGCTGTCACGGTTCAGCGACCTGCCCCACCGGGCGCTGCGCGAGATGTCCGGAACATACGGTCCGCTCATGCTGCTCCGCCTCGGCTCCGTGCCCACGCTGGTGGCCTCCTCCGCCGAGGCCGCGAGGGAGGTGATGCGGAGCCACGACGTGGCCTTCTGCAGCCGCTACCTGAGCGCCAGCCTGGACAT…
>Zm00001d033181
ATGCGCCGACTGGGGAGGAAAACAACAGGTTACGCGAACAGAATAAGAAAGCGAATTAATGGAATACGCCTTTTCTGGTATGACGTTTCTACCCCTTATCCTCATAACTATGGGCCAAAGTGTAATTTGCTCCGGCCAAATCTCCGTTCCCCTCCTTGTCCCCTGGGGTTTTGCTGTTCCTCGTTGCTGAGCAGTGATTGGAGGGGCTACCGGGATTTTTGCTACTTGCCTCCATTGATGGCTTATCTTCTTCTCCATCCTCAGTTCACTTGCTCCCAGCCCCCTTCTCATCGATTGAGGGGTCAAATACATTACAAGACAAACAATATGGGGAAGAACATGGCTAAATCTACAGTGAGTTTGCTTAACCGCAGTGCTAATTTTGCATCAAGGACTTCA…
>Zm00001d033320
ACGCCACGCCGTCGGGCAAGACCAGCTCCTCTCGCCTCCCGGCACTTCCGCTTGCCCTCGGTCAAGGTCAACCAATCGCCATGGACGCCGCGTCCTCGTCCGCGGCGCCGCTGCGCCTTGTGATCTTCCCGTGGCTCGGGTTCGGCCACCTGCTCCCGTACCTGGAGCTCGCGGAGCGGCTGGCGCTGCGGGGCCACCGCGTGTCCTTCGTCTCCACGCCGGGCAACGTCGCCCGCCTCCCGCCGCTGCGCCCCGCCGCCGCGCCGCGCGTCGACATCGTGGCGCTCCCGCTCCCGCGCGTCGACGGCCTCCCCGACGGCGCCGAGTCCACCAACAGCGTCCCCCACGACAAGTTCGAGCTGCTGTTCAAGGCCTTCGACGGCCTCGCCGCGCCCTTCG…
>Zm00001d033335
ATGTCTTCGTCTAACTCGCCCTGTGCCGCGTGTAAGCTGCTGCGCCGCAAGTGCACGCAGGGATGCGTGTTCGCGCCCTACTTCCCGCCCGACAATCCGGGCAAGTTCGCGAGCGTGCACCGCGTCTTCGGCGCCAGCAACGTCTCGAAGCTCCTCAACGACCTGGACCAGCTGCAGCGGGAGGACGCCGTAAACTCCCTGGCGTACGAGGCCGACGCGCGCATCCGCGACCCCGTCTATGGCTGCGTGGCCTACATCTCCGTGCTGCAGATGAAGATCAAACGGGTCCGCGACGAGATCGCCAACGCGCGCAAGGAGCTGGCGGCTTACATTGGGACCGCGGCCTTTGCGCCTTACGTCGCCACGCCGCAGTACCACCACCATCAGTACGCGGCAGGC…
>Zm00001d033423
ACGTTTAAATGGCTCCACTCACACTTGGCCTCGTTCTGCTGCAGCTCGTCCCTTTTGCCCCAATCTTCTTCTCCAAACCACATCCTCTGGCCTCTGACAGGTGACGAGTCCCATGGGTGCCGCGGCGAGGAAGCCCGCCGCCGCTCTGCTGCCAATCTGGCTCTGTCTCGTCTGCGTGTCAAGAGCGCAGCCGTACATCGGCGTGAACTACGGCGAGGTAGCGGACAACCTGCCGTCGCCGGACAAGACGGCGAGGCTGCTCAAGTCGACGTCCATCTCCAAGGTGCGGCTGTACGGCGTGGACGCGGGGCTGATCCGCGCGCTGGCGGGGTCCGGCATCTCCGTGGTGGTGGGTGTGGCCAACGGCGAGATCCCCACGCTGGCCGCCGACCCGGCCGC…
>Zm00001d033446
GTAGTCAGACCATAGCTAAGCTGAGAGCAAAGATGTCTTGGCGGCGAAACCAGCTACGTGCGTTTCTCGTTCTCGCCGTCATCCTCCTCATCACCGCAGCTACCTACCGAGCCAATGCGCAGCCGGCGCCTCCAGCAGACCCAACGCCAGCCGCTGACACCTGCGCCGACCCCAGCGTGGAAGGGGCGTGCCGCAACGTCCCGAAGGCGCTGCGCCTGAAGCTGATCGCCATCCCGACGATCCTCGTCTCCAGCGTGATCGGCGTGTGCCTGCCGCTCTTGTCCCGCTCTGTGCCCGCGCTCCGCCCCGACCGCAACCTCTTCGTCATCGTCAAGGCCTTCGCCTCAGGCGTCATCCTCGCGACGGGCTACATGCACGTGCTCCCGGACTCCTTCAGCA…
>Zm00001d033455
ATGGCTTCCGTCCTCCACCACCTCTTCCCGCTCGTCGTCGTCCTCCTCCTCGCGGCCGCTGCCGACGCGGCCACCTTCACCGTGACCAACAACTGCCCGTACACCGTGTGGGCGGCCGCCGTGCCGGGCGGCGGGCAGCAGCTGGACAACGGGCAGACGTGGAGCATCGACGTGCCGGCGGGCACGACGGGCGGGCGCGTGTGGGCGCGCACGGGCTGCTCCTTCGACGGCAGCGGCAACGGGCAGTGCCAGACGGGCGACTGCGGCGGCGTGCTGCAGTGCGCGCAGTACGGGCAGGCGCCCAACACGCTGGCCGAGTTCGGGCTCAACAAGTTCGACGGCCTCGACTTCTTCGACATCTCCCTGGTGGACGGCTTCAACGTGCCCATGGACTTCCTG…
>Zm00001d033462
ATGGTGTCGTGGAAGAGGAAGCGCGGCGGCGGCGGTGGCGGGGAGGAGCCGCCCGTCCGGGGCGCGGCCGAGGAGGAGAAGGTCCCGAGAGGGCACGTTCCGATGCTGGCCGCCGGCGGGGACGACGACGACGGGGTAGACGACGTCGGCGAGCGGGTGCTGGTGCCGGTGACGCTTCTCACCGACCCTTCCGTCGCGGAGCTGCTTGACATGGCGGCGCAGCGGTACGGGTACGGCCAGCCGGGCGTGCTGCGGGTGCCCTGCGACGCGGGCCGCTTCCGCCAGGTCCTAGACATCGCCATGCACAGACGCGGCGTCAGCTCGTCAGCCTGA
>Zm00001d033463
ATGGCTTGGACGAAGAGGAAGACTGGCGGCAGCGGGTCACCCGCGCGCGGGGCCGGCGCCTACGAGGAGGAGGAGAAGGTCCCGAGAGGGCACGTCCCGATGCTGGTCGCTGACGGGGACGGCGGCCACGGCGAGCGGGTGCTGGTGCCGGTGACGCTTCTCAGCGACCCTTGCGTCGCGGAGCTGCTGGACATGGCGGCGCAGCGGTACGGGTACGGCCAGCCGGGCGTGCTTCGGGTGCCCTGCGACGCCGGCCACTTCCGCCAGGTCCTCGACGGCGCTATGCACAGATGCGGGATCAGCGTCGCGTGA
>Zm00001d033493
GGCTTTCGTGGTTTTCAGATGCTGGTTGTTTTTGCGGGGTTTTAGCGAATTCTGGTCAGCACGCTGGCTTTGCCGTGGAATTTGCCAGGTGCAATTCACGTGCCATAATTTTCTTCACTATCGATATCGTAACTGGACGTATTTTTTTTGCCCTTTATGATATCTCCAGTGAGTAAATTGTACGGAGTATGTTCGTATCCTTTCCACACAACTGACAGTAAGAAATTATATCGGGGTGACATAAAAAGATTTTTATAACGCTTGTTATGACAGAATAAGTTACTAGATAGTAGAAGAGAATTTGCACAGTTTGTTAGTCTCTGTAATTCTGCTGAATTTCTGGACCAACGGAGCTGCTAAAATTATATGCATTGATTCATAGTACTCCTCTCACTTTCT…
>Zm00001d033559
AACTCACCGGCTGAGTCAGCTTCAATCTCACCTGTGACCTGTACACTCCCAGATCAGACGGTTCACGTACGACGGTTGGCAACACTCACAACCACCGCACCGCACACCGCAGCCCAAGTTCTCCTCTGCATCTGAAATATCTTGCCACCTGACGCGACAGCGACAAGATCCAAGAACTCGCTCGCGCGCACGGACAGGGCCGGAACCCAGGGATCGAGACTGAACAGCAGTCCGAGACGCCATGAACGTGGAGGAGGAGGTCGGGAGGCTCAAGGAGGAGATCCATAGGCTCGGCCAGCAGCAGCCCGATGGCTCTTACAAGGTCAAGTTTGGCGTCCTCTTCAACGACGACCGGTGTGCAAATATCTTTGAAGCACTAGTTGGCACCTTGAGGGCCGC…
>Zm00001d033623
ACAGCCTCACACAGACACCAACGCCACTGCACTGCAAAAGCAAGAGCAGCTAGCTAGTAAAGATGCTGAGCGGGATCATCGACGGGCTGACGGGGGCGAACAAGCATGCGCGGCTCAAGGGCACGGTGGTGCTCATGCGCAAGAACGTGCTGGACCTCAACGACTTCGGCGCCACCGTCGTTGACAGCATCAGCGAGTTCCTCGGCAAGGGGGTCACCTGCCAGCTCATCAGCTCCACCCTCGTCGACGCCAGTGAGTACCGCGCCGCGCCGCCGGCACCTCTCCGATCTGCGCTTCCCCATGTCGATCGATCTCGATCTCTCTAGGCTCTAGAGCTATAGCTCTCTCGGCCCCCACTTTTTACCTTTGCAAGCATTTTCCCTGCATGCGAAACAAGCG…
>Zm00001d033649
AGCCCACTCCAGCGCTGAAGGCCTGCAGCGCCAGCGCAGCGCCTCTCTGCTACTGTGCTGGCTGACGCCGGTGGGGTGTGAGCGAACTGCGAGCTGCTGCCACCCCTGCTGCCGCGGTCGACCGCCGGCCCCGGACCGAGATGGACGCTCGGTGGGCGGTGCTGCTCGCGCTGCTGGTCGCCAGCGGCGGCGTCCGTGTCTGCGCCGCCGCTGGGGCCAAGGGCGCCAACTGGCTGGGCGGGCTGAGCCGCGCGTCGTTCCCCAAGGGGTTCGTGTTCGGGACGGCGACGTCGGCGTACCAGGTCGAGGGCGCCGCGTCCACCAACGGCCGGGGCCCCTCCATCTGGGATTCATTCGCGCACGTCCCAGGAAATATTGCAGGGAATCAAAATGGAGACG…
>Zm00001d033711
ACTACAGCTCTGCTCACTCTCATCACTTCGCTCCAAGCCAGTGCTAGCCCGGCCCCTTGTGTACGTGAGAGACGGCATCGTACCGTAGAGCAGCATCCATGGCGGCTCAGGGAAGTGGCAGTGCTCGTGGCAGCGGCGCCGCCGCCGCGCTTGCGCTGGTCCTCCTCTGCGTGCTCCTCCACGGCGAGTTGGCCGAGTCGGCGGTGTACACGGTCGGCGACCGCGGCGGGTGGAGCTTCAACACCGCCAACTGGCCCAAGGGCAAGCGGTTCCGCGCCGGCGACGTGCTCGCGTTCAGGTACAACGCCAAGGCGCACAACGTGGTGCCCGTGAGCGCGGCGGGGTACAAGTCCTGCAGCGCGCCCAAGGGCGTGAGGGCGCTCACCACCGGGAACGACC…
>Zm00001d033793
ATGGCCACCAAAAGCATCGCCTCGCTGCTCGCCGTGGCCCTGCTGCTGCTGCTCTCCTCCCCGGCCGCCGTCGTCGTCGTCCGCGCGCAGCAGCAGCAGCGGGGCAACCCGTGCCCGACGAACGCGGTGGCGGACCTCAAGGTGTGCGCCGACGTGCTGGTCCTGCTCAAGCTCAAGATCAACGTGCCGCAGAGCCAGCGGTGCTGCCCGCTGCTGGGCAGCCTCGTCAACCTCGACCTGGCCGCCTGCCTGTGCGCCACCATCAGGCTCAACGTGCTCGGCATCCCCGTCAACCTGCCGCTCGACGTGCCCCTCGTGCTCAACTACTGCGGCCGGAACGCGTCCGCCGTGCCGGGCTCCAACTGTTCCTTCTGA
>Zm00001d033872
ACGCAGCACATATCAGACACCTCCGACCGTCGCATTCTTCACGAGTCCTCCGGCCCAGCGCGCGCCTTCTCAAACCTTCTAGAACGCCCACCTTCCTTCTTTCGTCCACTCCTCCACCGCTCCATTCCGAACCTTTTTAAGCTCTCCCATGGAGTCTGACCTCATAGCTTATATAGCAAAACAATAGAAGTAGAACAAGCACAGAACTGTTAAGCTCCGCAGGCTGCAGCTCGTCCCCAATGTCGTCTGCTTCTCTTGCATCTTCTCTCTTGTGCAGCAGCAGTGCTTCTACTAGTAGAAGCGCAACCGTGCCAAGAGTAACCAGGACCCCTCTTTTTTCCAAGAACCAGTACAAACCGCCTCTTCGGCCTCTTAGGAGTAGTTCAGTAGTAAGGCGAT…
>Zm00001d033907
ATGCCCCTATCAGAACTTCCTCCGAGACCATTGCTTGAGATCTTGGCACGAGAACTGCGGCGACGATTGGGTCTTAGACTATTCGACATTGATATGATTAGGGAGCACGGAACAAGAGATCGGTTTTATGTCATAGACATGAACTACTTTCCCGGTATGTGGCTCTTTCCTTGCGTTGCCTCTCCATTTGCAGGGAAGGGTGCTCCCAGCCCTCGTCGTGCCCCTCCCAACCCTCGTCGTCGTAACGGAGAGAGCCCCTTCTTTGGAAGGAGAACTTCAATTCTTGATACAGTCACAAAAGTTTGGTCCTGTGTGGTGATGCTAGATCTTGAATGTGATGATTTGATAAATGATATGTTCCATCACTTCTTGGTGACTGTTAACCGTATCATTTGGCTT…
>Zm00001d034051
CCATGTCACGTGTTCTGCTAGCTAGCGGAAAGCCACCGACATTATACTCAGCCTCACCGGTCATATCTGCCATTGAGCCACAGCTAAACTCCTCATCGATGGCTGATTCATTGAAGAGTCATTAGCTGAATTGTATGTGATCAATGGTCAATACGAAAAGGCACTTTCTCTTTATGCTGAACTCCTGAAGCCAGAAGTATTCGAGTTTATTGAGAAATACAACATGTATGATGCTATTCATGATAAGATTGTCAATCTTATGATAGTGGACAATAAAAGAACAGTTCACCTACGGACCCAACATCGTGATATCATTCTCCCATATGAAGTTGTGGAGCAGCTGTTGCATACCAGTAAAAAATGTGACAAGAGATATTTGTTACACCTGTATTTGCATGC…
>Zm00001d034074
ACGGACACTTCACGCACCTTGCAGTTGCAGCGGCGGTGGCACGGCAACAGGGAGGAGAGAAGAGTGAGGAACTGAGGATAGAGATATTTTAAGCGCCCCTCGATTTCCTTCGCCTTGTCAACTAGCCCTCGCTCATCGCATCGCACGCATCGCACAGACACTCCACTGCACGCGCAGCAATGGCGACGACCACCTCGCCGCCGCTGCAGCTCGCCAGCGCCTCCCGCCCGCACGCCTCCGCCTCCGGTGGTGGCGGCGGAGGTGGGGTTCTCCTCGCTGGCGGTTCCGGAGGTGGGGTCGCGCCAGGTTGGGGTCGAGGGCGATTGCAGCGGCGGGTGTCAGCGCGCAGCGTGGCGAGCGATCGGGACGTGCAAGGCCCCGTCTCGCCCGCGGAAGGGC…
>Zm00001d034095
CTAGTAGAGGTTGCACTAGCTCAAGCAGCCTATGCCACATTTGCACTCAAGCAAGTGAGCAGCTCGCCCGCCCTCCAGCAACATGGAGACGGCCAACGTTGTCATCCTCTCGTTCTTCTTCATCTTTGCAATCCACCGCCTCTTCAACCGCCTCCATAGCAGGAGCACGAAGATGAAGCCGCTGCCACCGGGCCCTCTAGCCATACCGGTCCTCGGCCACCTATACCTCCTCCTCGAGAAGAATATGCACCACTTGTTCACGCGCCTCGCCGCGCGCTACGGGCCCGTGCTCTACCTCCGCCTCGGCTCGCGTAACGCCGTGGTCGTGTCCTCTGTGGACTGCGCCAGGGAGTGCTTCACGGAGCACGACGTGACCTTCGCGAACCGCCCGACCTTCCC…
>Zm00001d034160
AGATCCCCTCACAGTCATCCTCCACCCACCCCACCCACCGCCTCCGCCTCTCTCTCTTTCGTTTGTTCGTCTCGGCTTCCGGTCGCCGATTCTTCTCTGCGCAAAAGATTCCTGGTGGTGGTGCCCGTACCTTGCTCCACGCCTCGCTCGCGTCGCGTGCATGGGGCTGGACGTCGGCGGCATCGGGATGGGCCTGGATCTGGGTCTGGACCTCGGGCTGTTCGCCGCGCGGAGCGCCGGAGGGATGGCGGCCGCGGCCAAGGGTGCGCCGGCGGAGATCGAGTCCTGCATCAGGAGCCTCGAGGAGGAGCGCCGGAAGATCGAGGTGTTCAGGCGCGAGCTCCCGCTCTGCGTGCGTCTCCTCGCCGATGTGATCGACGAATTGAAGGATGAGGCCGC…
>Zm00001d034172
CCTCGTTCTGTCGTTCTGCCGTTCTGCCTCCCATCTATCTGGACCGTCCGTTTCTATTGCCCTATGTCATCCAGCCACACGCTGTCCACGATCCAGCGGTGCCCGCCCCGGCGCCCCTTCCCTGTCCACGATCCAGCCGTGCCCACCCCGATGGCTGCCACTCTCCTCCACGCCGCCACCGCCTCGCTCCAGAGCTCGTCCCAGCCCGCACGCGCGGGCGCGGGCGCCGCCACCGCCTTTCACCCCCTCGCGTCCACCCCATCCATACGCCTCGCACGCTCCTCGTTCTCGTCCAATCGCCGCCTCGAGGTTTCACTCCGGGCGGTTTTGGCCGGTCACCGTTTCGCGGGGAGGGGAGCACCCCGGGGCCGCCGCGTCGTCGCCGCCCTAGCAGGGGAG…
>Zm00001d034208
ATGGCCGTCAAGGACGCCGACGCTGCCGTCACCGTGCAGCTCGACCTTGGCTTCATGGTCTTCAACCGGCCAAAGAAGAGGGCTATTGTGGAGAGTGGAGATGGAGGTCTTGGTTTGGGAATTGCTACATTCATTGCGAACGGTGAGGATTTGGGTCCCATCATTCGTCATTCGTTTGAGTCTGGGAAACCTGAAGCGCTGATGCAGAACCTTAGAAGCATTGTGAAGAAGAAGGAATCGACGCGCGATGAGTTGAAGGGCATGCTATATGGCGAGAATTCACACCTGCAGGAGGCTTCTGCTGACCAACTCCTGAAGCTCGACGAACTTCTTGAGCTATATTCTGTGAAGAAAAACGTCGGGGAGGCCATAACAACGCTGAAGATATGTGTGGAGCTT…
>Zm00001d034309
ATGCAGATTCAACGTCTTCTGTCCTCACCTTATCTATCTAATACGATTGCTGCTCTTGTTTCTGCCGAAGACCATGCTGAGACCACCCATTTCAGGCTTCCTGCTTCTGCTTATGAAGCACTGAATGAGATCGTGAGGGTCAGCAACATACCTGAAACTTCAGGCATCATAGCACAATTATTGGAGGATATCATGAGAACATTAAACCTTACATTTGATCTCCATATACTTTCTTCTGTCACTTCATTCGTTGTTATTTTGGCTCAGCTAACCATCAGGAGGTCTGGAGGATCACAAAGTGCCTTGGAGAACCACAAGTATGAAATTGCTGACTGGGACCTTGGTGCCGGAATATACATAGACTTCTACGTTCTGAAGAACTCAATGCAAGAAAGAAAT…
>Zm00001d034417
ATGGAAGCCACGGCGACGCCACGAACCCAAGAAGTGATGAAGCCCGAGCCCGGCACGGTCAAGGTGACCGTGGACGAGGTGACGCTCCGCAAGTTCGAGCTGTCCGACGTGGACGCCATGATGGCGTGGGCGTCGGACCCGCAGGTGGCCGCCTTGTGCCGGTGGGAGCCCTACGAGTCAACGGAGCCGCTGCTGGCCTTCATCCGCGACGTGGTGCTCCCGCACCAGTGGTTCCGCGCCATCTGCCTCGGCAGCGAACCCCGCCCCGTCGGCGCCGTGTCCGTGTCCCCGACGGGGGACCCGTGCCGCGCCGAGCTCGGCTACGTGCTGGCGCGCGCGCATTGGGGCCGGGGCGTGGCCACGGCCGCCGTGAAGCGCACGGTGACCGCGGTGTTCGGC…
>Zm00001d034461
ATCTCATATCCTACTGCCGGCGTTCCAGAGTTCGAGCTGAGCAGTTGCACACAGCTGCTCGTGAAGCTAGCTAGCGAAGCCACAGGCCCCCAGTGACTTTGCTCCCCCACACCGTAGCGGCCGTATAAACCAGCTCCAACCGATCCATCGAAATCGAACCACAGTACGTGAGCCCGTACTAGAGACATATGGCCTCCGCGATCAAGGCTGCATCGACCTCCTCCCGTGGTCTTCGTCCCCGGCGGCAGTCCACTCGTCGCCGTTATCGAAGCGGCTACCAGCTGCAGTGGCCATGCCGGGCGGCGGAGGTCTGTGGCCACTGTAAGGGCGGTCGCCGCGGTAGCTCCGGCTGCCCCGGCGCCGGCCAAGCTCACCGCCGGTGCCGGCGGCCGATGCCTG…
>Zm00001d034479
TACTCACCCAGCACCGCAGAGCTCTCATCCTCTCTCTCTCTCTCTTTCTCGCGCTCGCTTTGCTTCCTCGTCGAGGTCCAAGTTCCTGCATTGATGGCGACCGAGGTGGCTGAGACTCCCGCGCCGTTGGCGGAGGCGGTCCCCGAGACCCCCGCGGAGGCACCGGCGGCGCCCGCCGCCGAGGCGAAGCCTACCAAGGCCAAGAAGGCCTCTGCGCCCAAGAAGCGTGCCAACCCGACCCACCCGCCGTACGCCGAGATGATCTCGGAGGCTGTCACGTCGCTCAAGGAGCGGACGGGGTCCAGCCAGTACGCGATCGCCAAGTTCGTCGAGGACAAGCACAAGGACAAGCTCCCGCCCAACTTCCGCAAGCTCCTGCTCGGCCAGCTCAAGAAGCTC…
>Zm00001d034540
ATGGCGTTAGCATGTGCAGCAGCCAGGCTAGTCCACCTATGCATTGGCATGGGCATGGTGTCCAAGCAGCACCCAAGAACACCGCTGTCGTCCTCCTGCTGCCTACACCTCCACCACATCCTCTACCTTAGGCCCGTCGCCAGCAGCCACCACATGGCGCGCCACTCCGTCTACGTCACAAAGGACGACAAGCCGCTTGAGTCGCCGCCGGCAGCGGCTGCAGAGATAGAGAGCACGCAGCAGGAGGAGGACGAGGACGGTGGGCCAAAGCTGGACCCGAGGCGGTTCGAGGAGAAGTTCGCGGTGCTGAACACGGGGGTCCACGAGTGCCGGTCCTGCGGGTACCGCTACGACCAGGCGGCGGGGGACCCGTCGTACCCGGTGCTGCCGGGCCTCCCC…
>Zm00001d034555
GCTTTAGAAAGAGTAGAGAGTAGAGAAAGGTGTAGAGATTTGCCGGTTTGGTGGCGGTACGCACGAGCAGGCGCCCGGCGGCGTACGAAATTAGCTCGGGGGCGTACAGGTCGCTCTCGTCTGGCTCGGGGCTGGGTCCGCTGCCGTGGTGGCCGTCCACCGGGCGAGCCGTCGAGGTACCCAATTTCTGCCATGGCGATCCGCCCGGACCAATGCTCGATTCTCCATCTGACCATCGTCGGTAAGCCTCCTGCCCCACTACCGCCCTCCAAAGCGGCGCGCGCGCCACCGCCATCTCCACCCACGCCCACCTTGCTGCCGCGGCCGCCCCGTACCGCTACCGCGCCCTCGATCTGACCCCACGGGGCAGGATGGACAAAGGGAAATCGGTGGTGGCCG…
>Zm00001d034724
CGCCGTACAGCGGATAGGATAAGGCCATCTCCCATAACGGAGAGAGACGAAGAGAGCGGAAGCGAAAGAGCAGCGGCGCAAAGGAAAGGGAGCCATGCTCGCGTCGCCGGCGCTCGCCGGCGCCCACTCCTTCGCGGCGTCCGTGTATGGAAGCCTCCTCGTCCCCTCGCCTCCCGTCCCCGCGCCGGCACGTCGCGCGGCGCTGTCCGTCGTCGCCAAGGTCAAGGTGGCCACGCCCCAGGACGACCGCATCGCCCGCCACGTCCGCCTCCGCAAGAAGGTAAGTGGCACCACTGAGAGGCCGAGGTTGAGTGTTTTCCGCTCAAACAAACATCTGTACGCTCAAGTCATCGACGACACAAAGCAATGTACTCTGGCTTCAGCTTCAACCATGCACAA…
>Zm00001d034772
CAGGTGCTACTCGAGGCTGTATGCATTGTGTGGGGGAATAAGGGATATGTAGCTGCTTACATTTTGAAGAGATTTGATTATACCTTAAGCACGATTGCAACTGAAACTTTGGCTGTGGGTGATGGGTTCTGCTATTTTGGTATGTTATCATTCATCTCTATGATAGAGCAGATACAGAATGGTGAGTTTGGCAGGGGTTAATTGTTTCAATTTGTTAGAATTTTTCAAACGAAAGTTGTCTCAATTTTTGGATCATTCTTGGTTTTATGACGAATGCCCAAACTACAGATTATCTAATGGTCAAACTGAATATTTGTTTTATAGCAAAAGAACTATCTAGAAAATTACCTCTTTCATGTTTTTGTTCAGCGGCGGTCCACGCGGCTACCAATAGGGATG…
>Zm00001d034887
CAGACACCTAAACGATGACACAGCGTGCACCCACCACCACCAGCGCCGAGCGCCGGCCGCGATACCGTCGTGTCCCCCTCCCCACCGCATTAGCGCCGGCCGACAAAATTACTAGGTGCTTAATTTAACTACTAGTGGCCCTAGGCGTGAAACTTCACCAGCTCCGCCACTGCCCATGGCCAACGGCCGTCCGGACCCTCGCTGCGTCGTCCTCACCGCCGACACTGCCCGATCCCTCGTAGATTCCGTCGACGCCTTCCTCTTCGACTGCGATGGGGTCATTTGGAAGGGAGATAAGCTCATTGAAGGGGTCCCAGAGACGATGGAGCTACTGAGGAAACTGGGAAAGAAATTAGTTTTTGTAACAAACAACTCTAGAAAGTCGAGAAGGCAATACTC…
>Zm00001d034904
ATGGCGTCCGAGGTTCAGGAGCAAGATGACGAGGTGGTGGACAGGAACATCCTCCCCTACTGCAGCATCGACAGGAAGCAGAAGAAGACGCTGGGAGAGATGGAGCAGGAGTTCCTGCAAGCCCTCCAGGCCTTCTACTATGACCAGAAGGCCATCATGTCCAACGAGGAGTTTGACAACCTCAAGGAGGAGCTCATGTGGGAGGGGAGCAGCGTCGTCATTGCTAAACAGACGAACAGTGTCATTGTGAAGGAGGGTCCCAGGTGCAGTCTAAGGAGTCATAAGGTGTACAGTGACTTGAATGTTGACTACATAAAGATGTTTCTGCTAAATGTTCCAGCCACCACCGTAGCTCTGGGACTGTTCTTTTTCATTGATGAATTGACTGGTTTTGAGATC…
>Zm00001d034920
ATGGTGAGCAGCACCTCCCACTCCCAGAATTCAAACAGCTCCCCGTCGCCTCTGCACCTCAGCACTGGCATCGTCGGCTTCCTCGCCCGCCGTGCCGCCATGACGCGCCAACCATCATCCTTCCAGTTCCACCAGCCCCGCGTGGCAGTGCCACCGCTCGACTCGCCAGGCTCCTCCGTCGACTCCTCCGCGCCGACGTGGGTCCAGCAACAGCAGCGCGCGCCGCCCGCCCCCGTGCTCGCATTCGACGGCAACGACACCGACGAGATGGCGCTGCTGGACATGATCACCCGGCAGGTGCAGGGGCAGGGGCAGGAGGGGGCGACGTCGAAGCAGGAAGAAGCAGAAAGGTCCTTGGGGGCTGGCGGCGGGCGGCCCTACCGCGGGGTGCGCAAGCGT…
>Novel00253
CTGGATTCAAAAATATTTGCGATTTTTCTTTTAAAAAAAGAAATAAAAAAAGGAAAATATCTTAGGACCCTATCCTATCTACTGCCGCCGTGCTCCCCTTGATTTTTTTTCCAGCCGCTTCCTTATCTTCTGCAAGCATCGTGTCTCTTCTATCTCCCTCCGTCCCTCGTGACTTCCATTCCCTGCCGCCATCACAAGCTGCGTCCCCTCCAGCCGAGTCCTCGCCGTGGAACTTCCCAGCTTCCTGCGTCGCGACCCCCTCAGCTTCTTCTCCATGACCGGCGCGCCCCAAGTTTTTCCCCCGTGCGGCAGCTTCCCAGTTTTCTGCGCTCGCCGAGCAGCTTCCATGGCCGGAGCTCCCTCATCCCCTCCTCTCGGCGTCTTCTCCCTGCTGTGCTC…
>Novel00254
CCTAAACCTAGCGCGCGCCACTCTCCCTGGCAGCCGCCGTCAGGAAGCCTCCACTCCTTCTCCCTCTTCTCTCTCTTCTCTCCTCCCCTTGCTCTTCTCTGGCCGCCGCCACTTGCCCGGACTTCCTGCAGCCGAGCGCCCCTGCAGCTCCCTGCACCTTCATCCTGCGCGCTCCAGTCGACCGCGCACTGGGACCAGCGCAGTGCCCAGCCGAGCAGCGCGACGCCCGGTGGCGTTCATGTGCTTCTCGCGGGCTGATTGCAAATTTGTTCCCCTAGGACTTTGGCCGTTGGATGGTGTACTCTGCGGGATCCGCAACCTCCTACTGAGCTCCCGCACAGAGGGGCAGGCATGGTATGGCAATCTTACCCTGCTAAGTTCCAATTCCAAGTGGTACCT…
>Novel00257
CCACAACCGACTGCGCGGGATCCGCGGCCATCAGGCTCCACGTCCTGCTCCCTCTCCCCCTATCCAAACTGAAGCGCGCACGCAGGGAATCGCAACAACCTCCGAACCGCGTGCTGACACCTTGGACTCGGGCGTTAGCCCCCTGTCAGCTACCTCCTTGGCCGTCCACCCGTGCTCGGCTGTTGCAACGGCTCGCCGGAATACTCGCCACCAGCTCGGAACCACCTCGGCCGAGTCTTCGAGGATCGGTCCACGCTTCGACCTGGGGATATAGGCTGCGCCCAAGCTGCTAGTTAATTCCTATCTCGTCCAACTCGCGACCGAGAGAAGAGAGGGCAAGGGAGAAGATTGCCGCCGCTACCGAGCTGGTGGTTGGTCACCGCTGGGACCTCGGCTGGC…
>Novel00258
CTCGCCCAGTTCCTTTCCTGCTCGCCCCCTCCTCCTCGGTGCGAGCTCGGCACCTCTCTGATGCGGAGGCCGCGCCCAGGGACAGCAGCGCCATGCGCCACCGACATCTCTCCCCGCCGAGCATGGCTCTCAGCCGCAGCCACATGCAGCAGCGGCAAATCTGCTATGCGTGCACATTCCAGAGATAGAAGAAGATAACTCTCTGAGCCAATGACAGGTGGGCCCAAGGCGAGATGACCGAGAGATGATGATCGTGCAAGTGATGTGGTGCCAACTACAAGATGCAGTTGGTGGACGACCCAAAGAAGGATGGACTTAACAGTGGATGCTCGCCAAGCGAGTGTCATCTAGAAAACACTATCTAGTGTTGAATTCCAGGTACTACTTGGATGATTTGAT…
>Novel00263
CGGCCTCGCCTTGTCCCAACTACAAAAGCGAACCCAATCCCTCTTGACTCCTCTCATCCGCCTCGTCTAACCACCACCACGAGGGAGAGTTAAAGTCGCCAGTACAGAAGAGTGAAGGGGAGAGGGTTGCTGGGTCCGATTCGGTGGGCTCATCGCCGTCGGGTCCACGAATTGGTGCCTAGGAGTCTCGCGTGCTTCGGGGACATAATCGATGGTCTCGCTGCGGTGGGTTGGTGGCTGGAGACCTCAGAATTCGTCGTCATAGTGCGAGCTCCTCCGCGTGTGCACCGTGCGCCGTGGCCAGGGGTGTCTGCGCTGCAATTGCCAGGCATACAAGATGACGATGGTGCAATGCAAGTGTTTGGTGCTTTTGGTTGATAGAAGCTGCTGGATGCTTTT…
>Novel00264
TGCTCGAGCTGTTGTGCTCAGGTCTTCTCCGTGCCGTGCTCACGCGCGACGGTTGCAACCGCCACCGAGAATCCTGGCTCCAGCTCCGTAACAACCCCGCCTCCGCTCCCATATGAATCAGGGGATCCACTCGGCCGCACCCATCGCACCAAACCACCGAACAACCTTGCCTTCGAGAGAAACCAAGAGTGCGGGAGGAGGCGCATCCACAGAATCCGGTGCTCGATGGCGTAGCGCTCCAGCGAAGAGAACTGAGGGAGTATTGGTCTAGGCTGCGCGTCCGCAAAACAGAACCTAGTATCGAGGGTGGCTAGAGCATGGGGAATCGCTCGCGGGACTTGCTCTCGCCTTTGTGGAATCCAGCCGCCACGGCCAGGCCCACTCGCTGCACAATCCCTG…
>Novel00265
CTTTTACAATGAGAAGAAAAGTATTTTTGACTACTTTTGCACTCTTGACTGTCGATTTAGCTGTACCATGGATTTATGGACTTCTAATCAGAATAAGGGGTATTTATGTGTGACATGTCATTTCATTCCATGTATCGTTCTTCTACAAGTCGCCCTATGCAACAAACTAAAGTTAAAACTGCTAGATCTGTTAGAACATCTCAGTGCTATATGGACTTGAATGAGGAGCCAAAGAGAAAAAGATTAAGTTCATTTTAAGGGACAATGTTGATATTGGAAGAGCAGCAATCTGAAATAGATCAATACAATAATGATCCATTGTTGAGTTGGAAAGAAGGTAACTACTTTGACATTTGAGCTGGTGGAAGACCCATGGTGCAAATTATCCTATCCTTACTC…
>Novel00274
GACGCTTGTTCTCATCCTCTAGCTGCCGCCCTTGCTTTCCATGGCGGCGCTTCCTGCTGCTGGCAACAGCACCGACCGCCCTCCCTGCTCGCCGTTCCTATTCTCTGGCGCTCGCCCCTGCCCCAGCCATGGACGCCGTCGACCTCGACTTCCTCTGGCCGCGGCATCCGTCCTGCTCCCCGCTCCATCCATTTCTCCCTCCTATGGCGCACTCCTTCCCCTAGTCGCCCATGGCCGCGCCCTCTGCTCCTCCCCCTGGCGTCTCCTTCTCTGGTTACAGCTGTGGAACAGCAGCTGCCCTTGTCCCTCCCTGGCTCTAGCTCTCCAAGCCGATGCTGCTCGCTACCCCTCTCCAAGCTGACGCCCCAACCATGGCACTCTCTGCTCCTCCAAGCCGGC…
>Novel00296
CGCGATTTAGTTTCCCAAATCCCAGGGCCGATGTCAGCCCACGACGAGGACGGCGGCCGCCGCCGCAGGACCCTTGCCAAGGTTTCACTCTCGTTGGTCTCGGCCACCATGGCGGAGGCCTCCACCTACTCCTTAGACGCAGTCAAGACGCGCCGCCTCCAGTTCCACCGCAGCCCCGGCGGCGCGGGCGGGCGCGGCGTAATCCGGGTCGCGGCCGAGCTCGTCCGCGATGGCGGGGTTTAACGGGGCTTATCCCCCTCCGTCCTCCGCCACCTGATGTACACCCCGCTTTGCATCGTGGGGTTCCAGCATCTTCGGCCCACCCTCGCTAGCGACAGGCGGGAGGTTGGCCTGGTTGGGAAGGCGCTCGCCGGTGGACTTTCAGGCGTTGCTGCGCAG…
>Novel00308
CACTTACAAGTAGAGACACATCATCCAGAAACTATGCTTGTCCATTGCTCTAGTACGCCCACTTACAAGTAGAGAGATATCATCCACAAACTCTGCTTACACTGTCAACTGTTCAGCTCACAACTGTTGTAGTATATTGGCCTCAGGACTGAGAGATAATGTGACTGAATGATAGCCTTGGGCTCAATACTTGGAGTGAGTGTAGGTGGGCTGCACTAGATCCGCATTGAGGTCACACTGTACTTGGTTCATATGTTATACTTGTCTTATGATGCTAATAGAACAGTCAGTTTCAAATTAATTTAACAGGCCTGTCCCATAGTAGATATGGTGGCATGTAACTTTGTGGAAAATGTGGCACACATACACAGGTTTTTATTTAGGCTTACTGGAAATGAC…
>Novel00311
CGCCAGTGGGTTGCTGACAGAGATGGTAGTGGCCGCCGCGGCCGCACTCTACCTCGCTGTAAAGCCCCTGCCCCTCGTCCTCGTCCTCGTCCACCACAGCCGCCCCGCGCCCTCCTCCGCGCTCCGCCTCCCCCGCCGAACCGCCAGCGCCTGGCTGCCGCGCTTCCCCTCCTGCTCGACCTCAGCGCCGCCGCCGTTCGCAGCCGTCGCATCCATGGACGCGCCGCCCCAGGGTTACCGCACCAACGTCGGCATCTGCCTCGCCGACCCATCCCTCACCAAGATTTTCTCGGCTTCTAGGATCGACATTCCTAGCGCGTGGCAGATGCCTCAGGGTGGTATAGATGCAGGGGAAGAACCAAGGGCGGCTGCCTTCAGGGAATTGAGAGAAGAAACTGG…
>Novel00325
CGACTGGGAAGTTCAAGGGCTCTCCTTCAAGTCTACATTCAAGCTTATTCCTCTTCCATGCTATGATGCCATTTTGGGAATGGATTGGTTACAAGCTTTTAGCCCAATGTTCGTGGACTAGAAACACAAGTGGTTATCTTTCTCCTATTCGAATAAGCCGGTAATTATTCAAGGAGTGCAACCAACTGTGTTGTCTAGTTTCCTGTTGGAAGTCCGTCAGACAACTTCTGATGATTCTGCGCTATACCACATCAAGTCTGTAGATGAGCAGTGCATTCTAGCTATTGTTCAACAACTCTTGCAACAGTTTGACTTTATTTTTGCTGAGCCTGACTCATTGCCACCGAGCAGATTTTGCGACCATTCCATTCCTCTCATTACTGGAGCTCGACCAGTTAA…
>Novel00326
GTCGGTCATGGCGGCTCAGATCCAGACTCCTCCGGTGTGGGCGGGCGCTAGTTCCCCCGGCGGCGCGGCCCTAGCAGCGGCCACCCCGGTGGGCACGGCTTGTGCGCGGCCGTCCTGACCTGTGCGCGGGCGCAGCGTGGCCCTCGACGGCGCGCTTGCAAGCGCCCTACCGGTGCGTGGGCGGGCAGCCACGATGGCGCGCGGGCGAAGACCCTCGGCGGCGCGGCGGGCCCGGCTCTGATCCGGTCTCGTCTGGCGGGCGCGGCCCTGCCCCGGCGGCTCCCGTGACCCTAGTGCATGGCAACGGACAATGGGTATTGATGAAGCAAATGTCATGGTTGAACAACCCCAATGATCAGCTATGAGAAGAAATGACACGTATCTTTGACACACACATAG…
>Novel00339
GTCCGCCACCGGCCTAATTCGGTCCGCATCATCAGCTAGGCCGTAGCGAGGCACCAAGAGATTCATAGGAGTCTTCCAAGGCTGGTCATGGCATCTCCATAGGCGGTGATCGACTAGAGCATGGTGAATTCATCGTCGGAGCACTCCACAGCCGCGTGACCGCCGCTCACCGAAGTCAGGGAACTCCACGCAGTGGAGGCCGCAGCAAGGACATGAGAAACCCGAAGACCAATTTGGTGAAGTACCTGGGATCTCAAGTCCAAGGCAAGTTGTGCCCTTGGTCACTCTTCTTTACCCAATAATGTTACTATTAATCACTGTGGCATGCTCAGGTTAATTTTGATGGGATCCAATAGGTCACCCTAGTTTGAGTTACTTTATACCTTGCTTGCAACTGAA…
>Novel00346
TCCGGATTGAACCCTGCTGTGATGCGAGACAGCGCAATGCTGGCGGCGCGGGAGGCGAATAAGCGGCTGCGCGCAGCGCCGACGGCGACCCTCCCCACCGCCTTCTCACTGTTCTACAATGAGTATGTCATTACGAGATCATATTAGAAAGAGGAGGGAAGAAGAAGATGATGACATGATGTTGTTTATTTTCCCTGCCTTATATCTGATGGGTTCAACTAGAAGTGGGGGGACAAAAGAAGAAACGCCATACATCAGATGAGACAACTCCGTATGTGTATTGTCAAGTATTGGGAAGACAACTCCGTATGTGTGACCATTGTTATTACTGTATTTGCTTATGTAGCTGATTACTTATATAACTGTTTCTTGGCGAGTATGCGTGAACAATTGCAAGTC…
>Novel00356
GCCTGGCCACACTGCTTCTTCCACCTCCGCCGCACACGTTGCTGCCCCCCATTCCTTCCCTCCCAGCCAGCCCTGCTCGCTCCCGCGCGCGGGCTAATACACAATATCTGGCGCCGCTCCTCCTCGGCTTCGGCTGCCCCTCGCGCACTCGCTTCCCGTGGGCCGCGCGGGTGAAGGAGCGTACGTGCGGGTGGTTGATTTGTGGCTAGCTGGTGCGCGCGGGATGGCGTCGCTCGCCGTGTCCGGCGCGAGGCTCGGGGTGGTCGTGCGGGCCGGCGGCTCGGCGGGATCGGGCGGGGAGCGCAGGAGTGGGGTGGCCTTGCCGTCGGTGCTCTTCAGGAGGAAGGACGCCTTCTCTCGTGTCGTTCTGGGCTGTGATGGTGCTCCTGGAAAAGAGCT…
>Novel00369
GAGGAGGCCGAGCGCTCTACGTCTGCCATGGCGAGCTCTTCCGACCCCGACAAGCTCATGAGCAAAGCCGACAAACTGTAATTAGGCTTGCACGGAAGCTACCAACAGGTGATCTGCAGGCCATCAAGAAATCTGACGATGGCGAGGAATCCTTGGACGAGGATGACCTGACTTAAAACGATCTCCCGAGCCAAAAGGTGCAGAGAACAAACGTCATAGTTTGCCATCGGTGGGGGAACAACTGTAAAAAGAAGTTATGCGAGTTACATACTAAAAACTTGTGGGCAGCATTCCCATATCTATAAACATGAAATTTGTAGGGCCCAATTATGTTGTATCCGTACTGGTGGTTTGGTGTTACCGAAACTTAGTGGTATGTTTATGGTTTCTTGTACTACA…
>Novel00373
TGAAGACACCGCGGCGAGAAGAGAGAAACCGAGAGAAGGGAGAGAGCGCCGCCGCGCATGGGCAGAGCGTGTCCATGCGGTCATTGGGGCCTCGGGACCGAGTCAAGGGGCGTCGCCAGGCCGCGCTGAACATGACTGTGACTTCGCCTGGGCGGACTTGCGCTCCGGACCACCGGAATTTCTCGCCGGAATCCTCGTGCCGCCACACCGCGTGGTCGGGCCCCTCTGCGCCATAAACTCCGGTCAAAAACAGGTACCGCTGGAGGAGTATGAAGGATGCTGCGATGAGTACGGAGAGGTCTAGGCCGTCGTCTCCCAGTCAACTATGGTTATGGAGGATCGTCATCGTCATATGGTGAGGAGGCTGCCGATCGAGGTCAAGTATGCTGGCATCA
>Novel00375
CTCAAGTGAAGCTGATGAATGAACTTGAAGATTGGATGATCTGATCAAGTGCCAGGATGGGACATGCTCGACAAGCGAGTATCATCTAACAACACTAACTTAGTGTTATCACAGCAGTCATCCTTTGGTTTCATTGACTACCATGATCGCAGATATGCTGCACTAGCAATTTTATCTCTCAATGGCAGACAACTGTATGGTCAGCCGATTAAAGTCAATTGGGCATATACAAGTACTCCGAGGGAGGGCACATCAGGTCATTTTAATATTTTTGTTGGGGATCTTTGCCCGGAAGTCACTGATGCTACTTTGTTTGCATTTTTCTCTGGTTACTCTACTTGCTCAGATGCTAGTGTTATGTGGGACCAGAAAACAGGACGATCCAGAGGATTTGGTTTT…
>Novel00377
CCGGGATCTAGGGTTTCGCACCCAACACCCGGAGTGAGCGGCGGCGAGGGATCGGATCGTCGGCGGCGATGGAGGACGAGGTGCAGAGGGCAGCGGTGAGCAGTTGGAACGAGCTTGACTATGAGGCGGAAGCGCGTTTGGTGGCGGAGGCGAGGGCGTCGTGGGATAGGAAGGCAAGGGGGGAGGAGGAGGATGAAGAAGAACATGATCCTGAGATGACCTTGGACTACTACGCCTACCAGGCTAAAAAGTTTCGCAACACCTGGAACATCCTCTATTTCGGCCACTTCGGTCGCTTCGAGGACACCACAAGGATCCCTCCTATGCGCTTTACAGAGAAGCCGCCTGACTCCCCGGCGTACCCGCGCACTACACTGCAGGTCTTTTCGATCAAAGTTG…
>Zm00001d023376
ATTCCGTCGTCGTCGTCAGCAGCTTCTGCTTGCTCTGGGGGGAAGGAGAGAGAGAGAGCGAGAGAGAGATCTAGTAGAGAGGCTAGCTAGGTGGTCCTCGAACGAAGATGTTGGCGGTGTTCAGCGGGCAGGTGGTGGAGGTGCCGGCGGAGCTGGTGGCGGCGGGCAGCCGGACGCCGTCGCCCAAGACGAAGGCGTCGCAGCTGGTGGGGCGCTTCCTGGCCGCCTCCGAGCCGGCCGTGTCCGTGCAGCTCGGCGACCACGGCCACCTCGCCTACTCCCACACCAACCAGGCGCTCCTCCGCCCCAGGTACGTACGTTCGTGTACGGGGCTGCATACTGCTTTGCTGCTGGCAGGCACTGCCGCCCCCTAGCTACGAGTATTATTATTATTACTTG…
>Zm00001d023437
CTACCGGCTACCCGGCGTGCTGTGCCGGTGGGGGCTAGGATCCGGCCCGCAGATCCCCGTCGCGGTCGGCAGCACGGCTTTGCCAACTTCGACAGCCATCAGCGACGAGGCAGCGGGCGCCGCAAAAACTAGAGGACGCCACGGCGCTCTGCGAAAATCTTGTGCAGCCGGCGGAGCGGAGGGCCGTCGTGCTCCTCGTCCATCCAAACGCCATCCGCGTCCTGTTGCCGAGTTGTGTCAGCGTCCACGTCACCCACTATTAAAGCACCCATCCCGTGTTTTTCCTTGTGCGTGCTGACTCCACCTCCACTGTACTGGCAGCTTGGCGCAGTCAGGCAGGCTGTGACAGCTGCTCCTGCACCTCATCGCCTCCCTCGCCGCCGGACCGGATGATGCATT…
>Zm00001d023480
ATGGAGGACTTGAGCGCCATGCGTCACCACTTGATGTGCCCCATCTCACTGCAGCCCATGCAGGACCCCGTCACGGCGCCCACCGGCATCACCTACGACCGGCGCGCCATCGAGCGCTGGCTGGCCGCCGGCCACGCCACTTGCCCGGTCACTGGCCAGCCGCTCGCCCTCGCCGACCTCACCCCGAACCACACGCTCCGGAGGCTCATCCAGTCCTGGTGCGCCCCGCGTCCCTCCACGCCACCGGAGGCGGCGGGTGCTAATAAGCCGGCGGATGGCGACGACGCAGTGGAGCACTCGCAGTCGCAGACCGACGACGACGTCGTCAAGAAGCTGCTGCGCGCGGCTACTTCCCCGCCCATCGACGTGCTCCGCGAGGCCGCGGCGGCTGCGTTCGAG…
>Zm00001d023592
CACCTCCATTCTGCCACACCCACACTCCTCTTCACTCACTAACGGCCGTGCTTGCACTCGCAGCGCATCACTTGCTACTTTGGTAGTGGAGAGCAGAAAGAACAGAGCTAGATTATTCCCAACAAGCTACAGCAAATTAGTTGCTCTTCATGGCCGTGTCACACAACGTTGGGAGCAAGCACGGTGTCGCGCCGCTGGAGGTGTCGGTGGAGGCCGGGAACGGCGGAGCCGCCGAGTGGCTGGACGACGATGGCCGGCCTCGCCGCACGGGCACGTTCTGGACGGCCAGCGCGCACATCGTCACCGCCGTCATCGGCTCCGGGGTGCTCTCGCTCGCCTGGGCGATCGCGCAGCTGGGCTGGGTCGCCGGCCCCGCCGCCATGCTCCTCTTCGCCTTCG…
>Zm00001d023673
ATTGCCAGAAACAACGCAGAGAACTCAGAGCTCTTCGTGCCCTCCTGCAAGCGCCAAGGAGGAAGAGAAGTGTGCGTACTGCGTAGTTCCATAGACCCGGACAAACCAGCGCCATCATACAACACCAGCAACTGTTGGTTTAGTTGTATATCTGCCTTGCAGCCGTATTATCTGTATCACCCTTTTTGTGTCGCGATGGCTGGCCTATCTTTGGAACATCCTTGGGCGTTCGCCTTCGGCCTCCTAGGCAACGTCATCTCCTTCATGACCTTCCTAGCCCCGATACCGACGTTCTACCGCATCTACAAGAGCAAGTCGACGGAAGGTTTCCAGTCGGTTCCCTACGTGGTAGCGCTGTTCAGCGCCATGCTGTGGATCTTCTACGCACTGATCAAGTCC…
>Zm00001d023759
ATGGGCGAGGTGGCACCGGTGATTCCAGTCACCCGGAGGAGGACGATGTCTCGCAAGGCAGCGGGGGCAGTGGAGGCGGACCGACCCGCCGAAGATGTATCTGAGGAGAAGACATCAAAGATTACAATAGCTTTGAATCAGGAAGCTGAGGCAGTGGCGGTCGCATCAAAGGAGGAAAAAGGAACTGGTTGCACTGTACCTTTACGACTTTACCATTTCTTGAACATTGTCTACAAAACAAGAGAGTATGAGTTCTTGAGGCTTACCAGCCTGGGTGTGATCGGTGCTCTTGTCAAGCTATTTCAGTTACCAGAACTGTTTGATGATCAAGTGATGCACCGGTGTTGTCAGTTTCTTTGGGCGGATCTCATTCCTTGTCGAACACAACAATCAAGCATC…
>Zm00001d023799
CGGGTCGTCGGCGTCCTGGTGGTGGTCGTATCTTATCTCTCTCACTGCCATAGTGCCATCGTGCGAGCGGCGAGAAAGTAGAAGGAAGTGTGTCGTACTCGTACTCATACCGGGTTGGTTGGTTTTTGAGACGTGTGCGGTCGGGAGAGGGGATGGAGAGAAAGGGAGGGTGCTGCCTCGCGCCGAGGTACGCCGCCACCGCGGCCGCGCAGCAGGCAGGCGCGGCCTGGCAGATGGGGAGGATCATGCTCAAGTTCCGCCCGATTGCGCCTAAGCCGGCGGCCATGGCGCCCGCGCCGGCACCGGCATCGGCACCGGTGACCGGATCAGCCGCCGGTGCCGGGAGAGGGAAGCGAAAGGCCGCGTGCGGAGGCGGCGGGAGGAGGGGCCGGAAGCCCA…
>Zm00001d023811
AGTGAGCACAAACATAACAGTCTTACAGTACGTAGCAGCAGCCTAGCACGACGATGGTGTCCGGCAGCATCAGCGAGGAGATCGCCGTGGCCGTCCCGGCGGAGCGCATGTGGAAGGTGGCCTTCGCCGAGACCAAGTCGGCGCTCCTGCCCAAGGCCTGCGCCGGCTACGTGGACGCCGTCGAGGTCGACGGCGACGGCGGGCCCGGCAGCGTCACCACCATGAAGCTTAACCCATCGCTGGGTGAGAACAAGACGCTCAAGAGCCGCGTGGTGGCGTTGGACGCCGCGGCGCGCGTGGTGAGGACGGAGGTGCTGCAGGGCGGCACGGTGAGCGCGCAGCTCAGGACGCACTTCGCCGAGATCAGGGTGGAGGCCGCCGGCGAGGGCGCCTGCGTCG…
>Zm00001d023840
TCCTGCGGTCCTTCCCCAAGCTATTCCCAAACTGCCCCACGTCTCATCCTCGTGACCTCGCAAGCCTCCCCAACCCCCAGCTCAACGAGATCGGGCGAGCGATCCCCTCTTCCCCGACCACCAGATCGCAGCAATGGAGCCGGATCCGGTCGCCGCTAGGGCATCCTCCTCGCCGCCGCCTTATCCAGCGTCGGCCACGTCCCCGCCGTGGCAAACGCGAGTTGAGAACGCCGAGGTGGGCAGCGAGGTGGAGCAGGAGGAGCCAAAGAAGGAGGCAATGGCAGGAGTAGGAGAGACTCTCCGCAGCTTCATGAAGGAGTTTGGGGATCAAGGAGAGGACTCCATTATCTTGTCACCGTGGCTGAAGGAGATTAGTACTCCTGACCGCCCCACTGCCCT…
>Zm00001d023843
GTTCATCACCCGTCTTCCCCCAATGGCTCCGCCTTCCTCCGCCAGGCGCTTCCCATGGTCAGGGACGACCGACGACACTGGCGGCAGCGAGCTCTCCCTGCCCCGCAGGCGCTGGCAGTCAGTTGGGCTGCAGGTTAGGAGAACGAGGAGGAAGCCGACGGAGGGGCTGTTTGGATTCAGACGGATCATGGAGGCGGAGTTCATGGGCATGTTCCTCCCGGTCTTTGGGTCGATGCTTCGGAGAGTGGTCTCAGAGGAGGTAGAGAAAGCAATGTTCAGACAATTCAGTGCACAACCAGCACCTCGAAGGTTACTGGTGGACAGGAATCAGCACCCTCGGTATCAGCTGATGTTCTTGAATGGACTGAGACCCGTTTACACAATGACAAAGCTAGAACC…
>Zm00001d023863
ATGGCCCCGCCGGCCGCTGCGGTTGCCGCCGTCCGCCACCACAGCCCGCACCTGCTCCTCCGCCGCGGGGGCGGGGGTCTCCTATCATCGCCTTCGGGCCCCGCCACGCTCCCTTTCGCCTCGCGGGGTGCGGCCTCCGCGCCCGCGCGCCTGCGCCTGCCGCCGCCGCAGTTCTCTCTCTCCCCCGTCCCGAAGAGCCTCTCCGCCGCCTCCTCCTCCCACGTCATTGTACGGTCCCTCTTCACCGGCATTGTCGAGGAGGTCGGCCGCGTGCGCCGCCTCGGCCCGCCGCTCGCGCCGTCTGGGGGTGGCGGCGGCGAGGCTCTTGGCCTTGACTTGGAGGTCGAGACCAAGGACCTCCTCGCCGGTACTCAGCTCGGTGACAGTGTGGCGGTCGAC…
>Zm00001d023869
AAAGCACACACAGCAATAGCTAGCCCACAGAAACACACTTGAGCTGATCGAGCAGCACTAGCTACAGCTAGCAGGCTAGCGCTCATTGTTCGCTAGCTGATCGATCGACCGAAGGAGCCAAGAAGAGACGGTGGTGCCGCGCCGTACGTGATGGCGGAGAGGGTGTCGAGACTATCGACGGAGAAGGCGGTGGTGATCTTCACGACGAGCCAGTGCCCGATGTGCCACACGGTGTCGAGCCTCTTCTCCGAGCTGGGCGTGTGCGCGGCGGTGCACGAGCTGGACAAGGACCCGCGCGGCCGCGACATGGAGCGCGACCTCGCCCGCCGCCTCGGACGCGCGCCGCCCGTCCCCGCCGTCTTCATCGGCGGCAGGCTCGTCGGCTCCACCGACAAGATC…
>Zm00001d023873
ATGGAGCGCGTGATGAAGATCGCGTCGGAGCGCGCGGTGGTGGTGTTCACTCTGAGCAGCTGCTGCATGTGCCACACGGTGACGAGGCTGATGGCGGACCTGGGCGTGAACGCGCTGGTGCACGAGCTGGACAGCGACCCCAGGGGCAAGGACATGGAGCGCGCGCTGCTCAAGATGCTGGGAGGGAGGGGCCCCGCCGTCCCCGCCGTCTTCATCGGCGGCAAGCTTGTCGGCGGAACTAACAGGGTCATGTCGCTCCACCTCGCCGGCGAGCTCGTGCCCATGCTCAAGAGCGCCGGTGCGCTCTGGTTGTAG
>Zm00001d024029
ATGGCGAACATCATCCGCAAGTGCTGGGACCCGAACCTGGATAAGCGCCCTGACATGGATGAGGTGATGTCATTTCCATCCCTAAGACAAACAAGAACTACAGGCTGCTTCCGTCTTCACCCAATCAGGGATGAGGATGCCAAGTTCAAGCTCTACAACGGGAGGTCTGTTCAGTTTGACGTCGGCAACGTGGTCATGGTGACCGGCGGGAGGAACACTGGGCGTGTAGGAGTGATCAAGAACTGGGAGAAGCACAAGGGCATCTTTGAGGTCATCGACGTGCTTCTTGGAGCTTTTTGCATGCTATGTCTAGTTTTCTCCTATTTGTTGTACAGGAAAACATAGAATGAAATTCAAATTTGGTGGTCGCAAAAGTGTGGAGACTTGAATTCATATAAA…
>Zm00001d024037
ATCGATTTGGCATCCTAGCTCGTCTATCTATAAATAGATGCACCAGCTCCACCTGGTGTATTCACTACTCAAGCCGCTCAAAACTCTAGCTAGCTAGCAGGGGGGGAAATGGCTCCACTTCTCGCCGCAGCCATGAACCACGCTGCCCATCCAGTCCTTAGAAGCCATCTAGGACCCAACAATGAGAGTTTCTCACGACACCACCTATCTTCTTCACCGCAAAGCAGTAAGCGAAGGTTTAACCTTAGCTTTACGCCACGATCTGCAAGAGTAGGCAATCAAAATGGAGTCCAATTGTTGAGCCCTTCGGAAATCCCTCGAAGGGACTGGTTCCCCTCCGACTTCATCTTTGGTGCCGCCACTTCAGCGTACCAAATTGAAGGTGCTTGGAACGAAGAT…
>Zm00001d024071
AACTAGACGGACCAGAGGACGCTGCCACACTATAGATCCCGTGCTTGGCTGTACAAGAACAACCGCACTGATGCTACCGACCACTGGTGTCCGATTAAGCAGCTCATTTCTAAGAAGCCGACCCAGGCCAGCCGATATCGAGCACCAACGACACACCCCATTGACGTACAGCTATGATGCGGCCGACGTCGACCCTTGCTATGGTCGTGCCGTCGCTCGCTGTAGCCATCCTCTGCATCCTAGTCCGGTCCGCCTCCGCGGAGTTCTGGCTCGACGAGTTCACCACGGACGGCGACGTCCGCAGAGACTACGACCGTTCTGGCCGGCAGGTGGCGTCGCTTGTCCTCGACCAGCGTTCTGGCGCTGGCTTCAACTCCACGCGCAAGTACCTCTTCGGCG…
>Zm00001d024083
CGTACTTGCTCCCAGCCAAATCATTCACGTATCCATCTTCAAGCCAGCCGTCTCCTTATCCCTGCGACGCCGCTCACCTAGGCTCATCTTCCAGCCGCCCTCTCCACCCAGCAGCAGAGCACACCATCCTCTCCACTCGGATCCCCAAGCCCTCGCCTCCATCTCTTGCCACGACATCTGTCCCCTGCTCGAACCTCCACCCGGCCGCGTCCTCGCCGGTGGCCAGCGCCGCTGCATCGCCCTTCCTAGCGTCGGCCTTGGCACCGCTTCCCCGAGCGCCCTAGTCGAGCTCGCCCATCCTCTGCTCTAGCCCTTTCTCAACGCCGTCGCTGAGCTCGCCCCTCCCCTCAGCCATGGACACGACGACCTGCAACCCTTCTTGGTGGCCAAGCCCATCTT…
>Zm00001d024126
GACGAGCATGCGTGCTTCCTCAAACTAGCCCCAGCGGCATGTTGTCAACAATCCATGGGCCTTTTGGAGTTTTCGACATCATCTCACCTCGCCTCGCCCACTTCACCCATGGGTCAGAGGAGCTCTCCCCTTCACACGCCGCCCGCGGCAGGAGAGAGAAAGCGAGGGCGAGCATCAGCAGGGCAGGCAGGCGCAAGAAACGTCCCCCACCTCGTCCACCCCATCCTCCTCGCCTTCCGCCTTTATTTCTTGTCGTCTCCTTCCTCGGTCCTATCTCCTCGCCTGCTCCGCCTTTCCTCATCGGTTCATCCTCCCGTATCCTCTCCTCGTCTCCTGCGCCCCTTTTCTTGGGGGCTTGAGGTGAGGTTATCTCGGCCATGGCGGCCATCAAGAAGACCA…
>Zm00001d024138
ATGCCCTGCACCCGCCCTCTCCAGCCAAGCCCTGCACCTGCCCTAGCCCCCACCATCAACGGCCACGGCACCGGCGACATTGCAGGGGCTGAGAAGGCACAAAGACATTCTATTGGAACATCTCTTGTGGAAGAAGATAAACTTGAGGTTGCAACTTCCCTTATTGAGAAGGCAAAGGCAAAGGGGGTTTCTCTTTTGCTTCCCAGTGATATTGTAGTAGCAAACAAGTTTACAGCTGATGCTGGGAGCAAGTTGCAATCCTGTCGTAACATTGTTCGTACATTGTCTCTTAACAGTAAGTGCTACATTTTGATGCTATGGGATATTCTTAACAGTAATACTGGTGTTGCTGTCATGCTTTATGAGCCCAGATATAAGCACAATGTCAGCAGACTAGAA…
>Zm00001d024200
ATGGGAAGAAGCGAAGGCAGCACAAGCCCAGCGGCTGGGGGAGCCGCCTGCGCGTGCGCGGTCTGCGGCGGCGCCGCGGTGGTGTACTGCGCGGCGGACGCTGCGGCGCTCTGCAGCCCCTGCGACACCGCTGTGCACGCTGCGAACCTGCTGGCGTCGCGCCACGAGCGCGTGCCCCTTTCCATGGTGACTGCTGCATCCGGCGTGTACGACGACGACCTCTTCGCGCCCGACGACATCGACGCGGCGTCGTCGTGGGCGTCGGCGCCTGCGCAGGGGCAGGGAAGCCCCCAGAACGGGAGCTCGTCGGCGAGCTTCACCACCGGCGACAGCGGCGCGGAGGGCAGGGGCCTGTTCGACCTGCTGTCCGACGTCGACTTCGCTGCCTGTGTCACGGGC…
>Zm00001d024208
CATATCTCACTACCAAAAGCATCCGATCCCACACATCTGCTAAAAGGATATGGCTGCCCAAACACTAACTGCAGATGGTCCTCGCCTCGGCCAGCAGGAGATGAAGAAGATGTCTCCCTCCTTCCATCCAACTTTGTGGGGAGATTTCTTTCTTTCTTACGAGGCTCCCACCGAGGCACAGGAAGCTGAAATGCGAGAAAGGGCTGGAGTGCTGAGGGAAAAAGTGAGAAGCATGATTAAAGGTTCACATGATGTGCCAGAAATAGTGGACCTTATTATCACCCTGCAGAGACTAAATCTGGACTACCACTACGAGGATGAGATAAATGAAAAGTTGACTGTTGTTTACAACTCCAATTATGATGGTGGTAATTTGGTCTTAGTTTCACGCCGATTCTA…
>Zm00001d024211
ATCCCATGTCTCACTACATACCAAAAGCATCCCACACATCTGCTAATAAGGATGGCTGCCCTAACACAAACTACAGATGGTCCTCGCCTCGGCGAGCAGGAGATGAAGAAGATGTCTCCGGCCTCCTTCCATCCAACTCTGTGGGGAGATTTCTTTCTTTCTTACGAGGCTCCGACCGAGACACAGGAAGCTCAAATGAGAGAAAAGGCTGGAGTGCTAAAGGAAGAAGTGAGAAACATGATTAAAGGTTCACATGATATGCCAGAAATAGTGGACCTTATTATCACCCTGCAGCGACTAAATCTGGACTACCACTACGAGGATGAGATAACCGAAAAGTTGACTGTTGTTTACAACTCCAATTATGATGGTGGTAATTTGGACTTAGTTTCACGCCAA…
>Zm00001d024248
CTCCACACTTCACCTCGCCGATAAGGCTGCCGCGCCCTCCCTCACTCCCGCGGTCCTGCTCCCTATGGAGTCGGCGGCGATTGGGTCACAGTCTCCGCTCTCCTTCCCCTCCAGCCTCTGGTGCGTGTCTCTGCTCCCTGCGAGTCCCCTTGCGCGCGCAGTGTGTCACTGTCAGCGTCTCAGCGGACCGTGGGTGAGGAACAATTTATCCGCGCGCCGCGATGGTGCGGGTTTGTTGTGATTCGCGGTGGGGATGTTTATGCTCTTCACTGTCCCGTGGGTGGGGAGTGGATTGGATGCGGCTGGCATTGGCGTCACAGGGGAAGACTCTAGAGCTGGTAGCATTTGGCTTGGAGCGTTACTTTGTTTAATTTCCTCCAGACCCGCTGGTGGGTCTCC…
>Zm00001d024314
CGGCCCCTGCCCGAATGTTCCGTGCCTGCCAGAAGTAGAATCATTCGATTCCCCAAAGCGAAATCCGCAGCCTCGCCTCTCTCGCCATTTTCCAGGCGCGCGCTCGGCGCGGCCGCCGCCAGCGATACAGATCCTTGCACGGACACAAGGGCTCCGCGCTCCCACCGGATCGGATCCCGTCCCGATGGCTCCCACTCCCACTCACACGGCGGCGGCGGTGGCGCTCGCCGCGCACGACTCGTCCGGCCACCTCGCGCCGCTCACCATCACCCGCAGGAGCACCGGGGACGACGATGTAGCGATAAAGATCCTGTACTGTGGGATGTGTCACTCTGACCTTCACAGCATCAAGAACGAGTGGCACAACGCCACGTACCCCATGGTCCCTGGTCACGAGAT…
>Zm00001d024454
ATGGCGTTGTCGCCGTCTGCGCAAGCGACAAGCCCGCTCGCGCGCCAGCTGCTGCGCCACGTGTCGTCCGGCCTGGTCGCCGCCGCCTTCCACCGCCCAGCTCCAGCCATCAGTCTGCCAAGCGCGCCGCGGGGAGCGGACGACGTGGCCCTGGCGGCGTCTCACCACCAGCGGCTCTGGCCCGCTCCGTCACCGAAAGGGCGCCCCGGAGCCCCGAGGCAGGGGAGCGGCGGGCAAGTCCACCACGCAGCTCCGGCGATGGCGACGATAGCAAGCGTAGTTACGCCGCCCACGAACGCCCTGACGGCGGCGACCACGCACGTGGTGACGCGAGGACCCGCCCGGCCTGGTCTCCCGGCACAAGGCGGCGGTGGCAAAACGCATGGCGCACCGGCGGCG…
>Zm00001d024458
ATGGCGTTGTCGCCGTCTGCGCAAGCGACAAGCCCGCTCGCGCGCCAGCTGCTGCGCCACGTGTCGTCCGGCCTGGTCGCCGCCGCCTTCCACCGCCCAGCTCCAGCCATCAGTCTGCCAAGCGCGCCGCGGGGAGCAGACGACGTGGCCCTGGCGGCGTCTCACCACCAGCGGCTCCGGCCCGCTCCGTCACCGAAAGGGCGCCCCGGCGCCCCGAAGCAGGGGAGCGGCGGGCAAGTCCACGCAGCTCCGGCGATGGCGACGATAGCAAGCGCCGTTATGCCGCCCACGAACGCCGTGACGGCGGCGGCGGCGACCACGCACGTGGTGACGCGAGGACCCGCCCGGCCTGGTCTCCCGGCACAAGGCGGCGGCGGCGGCAAAACGCATGGCGCACCG…
>Zm00001d024471
AGGGAGTGGTGATATATGCACTGCTCAGTACGCAGCCGCTCCCACTACTAGATTCAGGTGAGCTCATCATTAGTGCCCCGGCCCTTGGTGCGGTGCGGCCAACGGCCATGGCGAAGCTTGCCGCGCAGCTCAAGAGCAAGTTCTTTGGCCTCGTCGGCCGCATCACCAGCTGTGGCCGCGCCGGCGCCACCCACAAGGATGCCGCTGGTGCGACAGAGGCCAAGTCATCAGTGGGATCCCAGCCTGTTGAGATCAGGTCAAGGGGAGGTGCTCCTCCCGTTGATGGAGGGGCCAAGGGTCACATCAACAGTGACACCATCTAGAGGAGAGGGAGAGGAGAAGAGAAGAGATCGAAGAGAAGAGAAGAAGCTCACCGATGGTGCTTGGACTTGGACATTA…
>Zm00001d024476
ATGCCGCCGATCAGCCTCGGCGACATTTCCAGCTTCGTCCGCACTACCGACGCGGACGATTTCGGTCTATGGTTCAACATCACCGAGGCCAACAACTGCACAAAGGCCGGCGCCCTAGTCCTCAACACGTACGATGCCCTTGAGGCAGACGTCCTCGCCGCCCTCCGCGCTGAGTACCCGTGCATCTACACCGTCGGGCCGCTGGGCTCCCTTCTCCGCCGGCACCACGACAACGAAGACGCAGACGCCGTCGGCGGCTCGCTTGACCTGAGCCTGTGGAAGCATGACACCGAGTGTCTGTCCTGGCTGGACGCGCAGGAGCCGGGCTCCGTCGTGTACGCCAACTTCGGTAGCCTCACCGTGGTCACGGCCGCGCAGCTCGCGGAGTTCTCTTGGGGC…
>Zm00001d024518
GCTCAACACAGGGGCTCCTGCATAATTAAATCTGGAAACAGGGGGTTTCTCACTGCATAATGACTCCAGTATCGCTCTATATAACAAGTGGATCCGATCTAGTCGCCAGTCGTCGTCGTTAAAACCGAGAAGAGACCAGGCCGAAGGAAAACAATCCTGAAACCAAGCCATGGGTCTGCAGGAGGAATTTGAGGAGCATGCTGAGAAGGCAAAGACCTTGCCTGAGAGCACGAGCAATGAGAACAAGCTGATCCTCTACGGGCTCTACAAGCAAGCCACGGTTGGAGATGTGAATACCGATCGTCCGGGCATATTCTACCAAAAGGACAGGGCCAAGTGGGATGCCTGGAAGGCTGTTGAAGCATCACAAGGTATTACAGTACTTCTTGCTCAGACTCT…
>Zm00001d024560
ACGCCCAGTCGCGCCTCCCAGGATCACGCCCACGGACGCAACCTCCCTCCCTCCCCGTCCCCGTTCATGTCGCCCCCGTCCGTGATCCCCTCCCCGCCCTCCTCTCCACGACCCCATCCATCCTGCCGTCGTCCACGCCCAGCAGCGCTCAAAAGCAAAAAAGGGTACGAATACGAATCCCAATCCAGGGTCGGAGGGCGAGCGAACTCAAAAGCAAGCTGTTCCAGTCCAATCCGCCCCAGTCCAAATCTAATCGCCGGGTTTAGGCAGAATGGGTGGGACGCGGCGAGGTTTAGGTGGGGTTTGTTTTGTCCCTTTCGTGTGATTCTGCTCTCCGCGCGGGAGGCAAGTACTGACGGAAGCGAAGACCAAGGCGGAGGAGGGGGTCCCCGGCGGTGG…
>Zm00001d024672
ATGGAGGCGTGGCCGGACGATTTCCGCTGCCCCATCACGCTGGAGGTCATGACGGACCCGGTCATCCTTCCCTCCGGCCACACCTTCGAGCGCCGCAGCATCCAGAGCTGGCTCGACGGGGGGCACCTCACCTGCCCCGTCACCAACCTCCCGCTGCCGCCCTCCCCGCCGCTCATCCCCAACCACGCGCTGCGCCGCCTCATAGCCGCCGTCTCGCCTTCCGCGGCGGCGTCTCTCGTCCCTGCGGAGGGAGGGGCGCACGCGAGGCAAGAAGCGGTGTCGGCGGCGGCGGCGGTGCCAGCCCGGCCCGCGTCGCCCGTGCCGGCGCTGCTGAGGCTGGCCAAGTCCGGCGCCGCAGGGCGGAAGGAGGTGCTGGAGTCCGGCAGCGCGGCGGTGCTG…
>Zm00001d024713
AGGCGTGCACAGGACCTTGTTCTGCCTCCCCGCGCATCGGCTGCTGCCGCGCACAAATCCGCCGCGCCCTCGGTCCCGCAAATCCGCCGTGCCAGCTCCGCCCGCTCGATTCCCCTCCTAGCGCCCGCATTCCCCGCCGCCGTCCTCGCGGCCGCAGCGCCCCTGGACCCCACGCCAGCAACGCCCGCAGTCCCCGCCGTGGATCTCGCCCGAAGGCGCCGCCATGGACGCCCTAGATCTACCACCTCCTCCTCTCCCCATCACTGCGCCGCCTGCCCCCGCCGCACACCTACAGCGCGCCCCTTCCCCCACCGTGGATCTCGCCCATACGCCAGCGGATCTCGCACTCCTTCCTTCGACGGCGCGGTGGCGAGGAGGTCAGCGACGGCGGCGTCGAGT…
>Zm00001d024744
GGCGGCAGCTTCTTGCCCTCTTCCTCCATTGACTTGCCGATGCAGATCGAGGGGCGAGGCTGCCGTCGTCGTCCCGGGCTCTCTGTGCGCGTACGCGGAAGAGTGAGGAAGCTCTAGTCCACTCATACAGCCTTTACGGTTCAGGTAGGCACCCTACTAGTACTAAGGCTCCGTCCGTCTCTCCCTTCTTTTTTTTTTTGTTTCTGTTTCTGTTTCAACGAATGCCGGTCTCTATTGTCCGTTCCAGATTGAGCGTGCTTTGGCCTTGAATCCATGTATGCATACATTAATAGTGACGACTTCATTTCATAGATTTTGTTCGTCCCAGATTGAGCGTCCTTTGGCCTTGAATCCATGTATGCATACATTAATTGTGAGGAGATAGTATGATTCTTCAGC…
>Zm00001d024752
ATGGGGTCGATGACATGGTTGGCGGCCGTGCTGGCAGCACTCGTCGTCGCCGCCTCCTCATCGGTGGCATCACACGCCTCGCCGCCGGGGAAACTTGAGGTCGGTTTCTACGAGCACTCGTGCCCACAGGCCGAGGACATCGTGCGCAACGCCGTCCGCCGCGGCATAGCCCGCGAGCCCGGCGTCGGCGCGGGGCTCATCCGCATGCACTTCCACGACTGCTTCGTCCGGGGCTGCGACGGCTCCATCCTCATCAACTCCACGCCGGACAACAAGGCCGAGAAGGACTCCGTGGCCAACAACCCCAGCATGCGTGGCTTCGACGTCGTCGACGACGCCAAGGCCGTCCTCGAGGCGCACTGCCCGCGCACCGTCTCCTGCGCCGACATCGTCGCGTTC…
>Zm00001d024763
ACATTCCATCGGTCGTGAAAAGAAAAAGGGAAACAAACCAAGCTAGAGAAAAGAAGAAGGTACTACATACTAGCTAGCTAGCTTAGCTATGGGCACCATCGTCGACGCTGACGTCGGGTTCGCGGTGAAGAGGACGAGCAGGTCGCTGGTGCCGCCTGCGTCGGCGACGCCGCGGGAGACGCTGCGGCTGTCGGTGATCGACCGCGTGGCGGGGCTGCGCCACCTGGTGCGGTCGCTGCACGTGTTCGCCGCGGGCGGCGACAAGAAGCGGCAGCAGGCGACGGCGACGCCGGCCAAGGCGCTGCGGGAGGCGCTGGGGAAGGCGCTGGTGGACTACTACCCGTTCGCGGGGCGGTTCGTGGTGGTGGACGCGGAGGGCGGCGGGGAGACGCGGGTGGC…
>Zm00001d024768
GTCTTTCCGTTTCACGTTTCCGGCCGCTTCTTCATTCGGTTTTTCTTCTTTCTGCAGTACTAGTAGTAGCTTGCATAGTTGGACATCTCTCTCTCTCTCTCTCTCTCTCTCTCTAGCTAGTACGGCACCGGTCGTCACAAGCTGTATATAGCCGTGTCTTCCTCGCCATTACCCGGCTTGATTTGATACCTCCTCGCTCCAGCCTACCCATCCATGGACTTGGTGCCGAAACACCAGCAGCAGCAGCAGCAGCGAGGGATCAAGGAGGAAGAGGAGATGACGGTCTTTGCGGAGCACGGGGACCAGCAGGCGACTTCCGGGGCCGGCCACGGCGGCGGCGGCGGGCGCAGGAGCGAGATCAAGGAGGTGGACTTCTTCTCGGCCGCCGCCGGCGGTGCC…
>Zm00001d024802
ATGTCGAAAATGTTCCGCGGCAACAACAACCCTAGTAGCAATTACGAGCTGCCAGTGGAGAGCGTGGTGAGGGTGAAGAAGGTGGAGAGGATCGAGGCGAACAACCTGGTCAGCAAGCCCAAGCCGTCGCAGACCAAGGTGACCAGGAGCCTGACCGTCAGCGTTGTCCGGGTCGGGGACGTGGACGAAATGCCCGACGACAGCCACAGCAGCTTTGTCTCGGTGCCTATTGCTGCGCATACCTAA
>Zm00001d024839
CTCTCCAAGACTCCAATCCCCCAACCACCAGAACCAGCGCCAGCTCTAACGTCACCTCTGATTTCTCTCTCCTCTCTATTGCTAGCTGCTTTATTATAAGTAGCAGCTGCAGCAGGCAGGAGCTGCACACACCCATCCAATTCCAGCTGCTGATCTTGATCCTGCACCCCGAGCCGTACACAAGAGCTAGTCGGTAGAACTTGCAGGAGCGGAGCAGAACTAAGTGCAGAGAACAGGACATATGGCTACGCCGGCGGTGAAGGTTTACGGGTGGGCTATCTCGCCGTTCGTATCGCGGGCTCTGCTGGCCCTGGAGGAGGCCGGCGTCGACTACGAGCTCGTCCCCATGAGCCGCCAGGACGGCGACCACCGCCGCCCGGAGCACCTCGCCAGGAACCC…
>Zm00001d024842
AATATAGCGATCACGTTCATGATCGGTGGCACTCTGGGCTGGATAGCTTGCAACATCTTGAAGCCACTGCAGCACTTCAGGGGCTTGATCATGGCCTTCTGCTTAGCAGAAACGCAGGAAACCTGCTCCTGATCATTGTCCCGGCTGTATGCGACAAAGACCGGAACCCGTTTGGGGATGATTCAAGCACTTGCCGCTCACGCAGTCTCTCCTACTTGTCCTTGTCCATGGCTCTAGGTGGCCTCTTCATATGGACGCACACGTACAGCCTAATGCAGAAGTCCGGCAAGCTATATAACAAAATGCAGTCTAAAAGAATCCAGTGCCTAGCCGACAGCAACGAGGAGCATGAGCAAGCGAAAGAAGATGGGTCAGCTGGCTGCGCTGACAAGGAGGCAC…
>Zm00001d024843
ATGGTGGTTCCCGTGATCGACTTCTCCAAGCTGGACGGCGCTGAGAGGGCTGAAACCCTGGCGCAGATCGCCAATGGCTGCGAGGAGTGGGGATTCTTCCAGCTCGTGAACCACGGCATCCCGCTGGAGCTGCTCGAGCGCGTCAAGAAGGTGTGCTCCGACTGCTACCGCCTCCGGGAGGCCGGGTTCAAGGCGTCGGAGCCGGTGCGCACGCTGGAGGCGCTCGTCGACGCGGAGCGGCGCGGTGAGGTGGTGGCGCCGGTGGACGACCTGGACTGGGAGGACATCTTCTACATCCACGACGGATGCCAGTGGCCGTCCGACCCGCCGGCGTTCAAGGAGACCATGCGCGAGTACCGCGCCGAGCTGAGGAAGCTCGCCGAGCGAGTCATGGAGGCC…
>Zm00001d024926
ATGGCGTCCAACGACAACGTCGCCGTGGCCAGCGAGGTGAGCAACGCCGTGACCAAGCTCAACTACCACCTGGCCACCGCCCTCACCGGCAGCGGCAGCGGCAGTGAGAACGCCGCCACCACCGTCGTCACGCTGGCGGGGAAGAACAGCGGCGCCACCATGGAGGCGGCGGCCGCGGGCGACGTGGAGGACCTCGTCGTCGTCGGCAGCGCGGACGCGGAGGAGCACGACGAAGGCCATGGCCAGGACGACGAGGAGGTGGTGGTGGAGGAGAACGTGGTCATCACCGCCTACGCCAACAGCAACTACCAGGCCGTCAACAACTCGGTGCTCGTCGCCGGCAGCTGCGCCGTCGACGACCCCGGCGTGCACGTCGTGGTGGTGGAGCACGTCGACGAG…
>Zm00001d024939
GCCACCTACCACCGGTCAGCCCCATCAATCTCTGAGGCAGCGTCAGCCATCACGCCTCCCTCATCGATCTCCCCGCCGCCGCCGCTGCTAATACCAGATAATGGAGGCCGGCGCCGCCGCTGCTGCCACTGCCATCTACCCTCTGCACCGATGCAAAACCATACACCTGGTTCCTACATCTTACCCTGCCTGCCTGATTTGCTCCTCTTCGCATGCATATGCATCCTCTCTCTCTCACACACACACAACAATTTTTTAGCATATATACTGCTACCCACTTGCTGCTTATTTTCGCATGTACATGAACATCACCATCACATTACGCAGGTGAGGCATGCCCAAGGTGTCCACAACGTGGAAGGCGACACGGATCACAGCGCCTACATGAAACCCGACTTC…
>Zm00001d024942
ATGCCCATCCTTGAGTCCACTCTCGCATGTACCAATGACTTTGCACTTCATGTACAGGAAGATCCTACCAATTCTGATAGTGATGCTAAGAACTCAGGAAGGACCAAGTTTCCAGCAGATGAAGATGCTCATAGTGTTGGTGACTGTGTAAAGGTACCCATACAATTG
>Zm00001d025170
ACTGTTGCAGCGCGAGTGTAGCAGGCTGCACACACAAGGAAGGGGACAACCACAAGCGCCTAAGATCCCGTCCTCCGCGTCGAGATCTTTGCCGAGGCGGTGACCGTCGAGGGATCGCCATGGCGTTGAGGGCGTCCCCCGTGTCGCATGGCACCGCGGCAGCGCCGCTGCCGCCTTTCGTGAGCACGGCGGATCCCTCGCCTCTCGCTGTCTTCCTCACCGTGATACGCTTTCCTTCGCGGAATTGCGTTGGTTCTTGGGAGCCACGATCTTTGGGGTTGGTGAGATTCGCGATCTGCAGTGACTTGGTCCTGTGGATCCAAGCAAATCACTGGTGAAAATTCCACCTTTGCGATTGACACGTGATTTGGGCGGGGGGCAGAGATGCCACCTTGCGGG…
>Zm00001d025218
ATTACGGACACACGGGCACCCCGTCTCCTCTTCTTTCTCTGTGTCTCTGTCTCCTCACCAAAGAACCGCAACTAGGAACGGCTCGCCACAGAAGAACGTACGGCTATGAAGACGAGGCGCGGTGCCTGCTACTCCTGCCATGCGGCGCCGGGCGAGGGCCCGGAGGTGCAACGCCGGAAGAGGCGCAGGACGGCGGCCGAGGCATCGCCGGCGGCTGCCGAAGATCCAGGTGTCCGCCTGGGCGCCAGAGACATGTTCGAGGATCTGCCCGACGATCTCGTCGTCTCCATACTGAGGGACGTCGCCGCGTCCGCCGGCTCGCCGGCCGATCTCGCCGGCGCCATGCTCACGTGCAAGAGATTCAGGGAGCTAGTAGCGCGGAGCAAGGTGGTGGTGCTC…
>Zm00001d025255
CGGTTAACTGTACGTGGAAAGTTTGTACCTAAAGTGATGAATGCCAAAAGATTCTCGCTACAGAGACGACCATGTGAAAGAATTTAAATCTAGAGTACAACGTGAAGGAATGGCGTTGCCGTCGGCCACCGTGCTGTGGACGGCCAGCATCACCTTCCGGCTTGCACAGAACATGGTGGTGTTGTTCTTCCTGGCGGCGCTACTGGCGGCCCCGGCGCGTTCGTCGTCGCCGTCGTCCAACAACGGCGCCGGTCTTCAGCAGCCCACCCTGACCCTCTGCTCCGGTCACTCCACTGTCGCCAAGAGCGGCGAGTTCGCCAGCTTCCTCGCAGCCGTGTGCGCCGGAGCCTACGGCGGCGGCGTCGCCCACATGTCCCACAGCATGTCCTCGTACGTCGC…
>Zm00001d025288
GATCTTCTCGTTACCAACCCCACCTTGACAGATACACAAAATCCATGATACCAACCTATTTTGCTGCTGCTATGTACATTGACAATGCACGCTGGGATGGGGTACCATTTTTTATCAGTACAGGCATGGGACTTATGACGAATAGGTATTTTGGAAATTATGGGATAATCCGTGACATAGTTCACAGCCTCATTCTTCAAACAATAGCTCTATTTGCTATGGAACCACCTGTAAGTCTTGATGGAGAGGATATCCGAGATGAAAAGGTGAAGGTTCTCAGATCCAATTCGGAAAGTGATATGAATAGAGTGGGACAAAGCAGGTGCGCAAGGTACCCAAATCTGCACAGAAATAGGAAGAGGGAGGGCAATGTGCAGTTTGGAAAGTTTGGTCAACGTG…
>Zm00001d025326
TGTATGTATTGCCTGCCGCCCCTGGCTTGTGCTCATGGGCGCTGCTGCTGCGGCCAATGAAGGGGCGTTGCCGGAGCCGTGCGGCGGCCGGCGGCCGGGAGCGGGGCCGATGGGGCGCTACGAGCTCGTCCGCAGCGACGACGCGCCTGCCGTCGCCGCGGATCTGGAGGCCGGCACCGCCGCGCCGTGCGACGGCTACCCCAAGCGCCGCGTGTTCACGCCCTCTCCGTCTCCGTCTCCGGCGCCGGCGTCGACCCGGTACCGGCAGCGCCTCGTCTCGCTCGACGTGTTCCGCGGGATCACCGTCCTGTTTGCCCAAGTCCATGCTAGTGCCGACGGCCCGGACCTCGATTCATCAGCAGCAGATGCCAACGCCCCCAACAGCAAGCTGATGATCAT…
>Zm00001d025333
ATGGCTGCAACGAGTATGATCAGGGCGCCGATTGGGCCGAACCCGAGGCTCGCGTGCTACGCCCCGGCGAGGGGCGGCGGCGTGGTCAGGTGCTCGTTGCAGGGCGCGGTCGTCGGCGGCCGGGCGGAGTGGCAGAGCAGCTGCGCCATGCTGTCCAGCAAGGTGGCTGCGCTCGGGACGCACTCCATCAACGGCCACGTCGCGCCGGCGCCGGCGCCGGCGCCAGCGGTGCTGGATTTGGTCCCCGTGAGTAGTATGAATGGCGCCGTGGCTAAGAACCTGCCGCAGCCGCTTCGCATCGCGGACCTGTCCCCTGCGCCGATGCACGGGTCGGAGCTACGCGTGGCTTACCAGGGCGTGCCCGGCGCGTACAGCGAGAAGGCGGCCGGGAAGGCGTAC…
>Zm00001d025354
ATGAGGGCGCTTGGAACGGTTGCTTGGGCATGGCTGCTGCTCCTGCAGCAGCTCGCCGGGGCCTCTCATGTCGTCTACGAGAACCTTGAGGTGGAGGCGACGACAGCCGCCGTGCGGCCCTCCATTGTCGACCCCCTGCTGAGGACCGGGTACCATTTCCAGCCTCGCAAGAACTGGATCAATGCTCCACTGTACTACAAGGGGTGGTACCATCTCTTCTACCAATACAACCCGAAGGGCGCGGTGTGGGGCAACATCGTGTGGGGCCACTCGGTGTCGCGAGACCTGATCAACTGGGTGGCCCTGCAACCGGCGATCGAGCCGAGCATCCCGTCCGACAGGTACGGGTGCTGGTCGGGGTCGGCGACGACGCTGGCCGACGGCACGCCGGCGATCATG…
>Zm00001d025476
TTCCATCGAGCCTTACGAGTGGAGAAGAACACAAACCAATCCCAGTGGCCACACGAGATAGTGCACCCACGCGACACGCGCCCTATCGTTGATAGCCGACACGCCGGCGCCGTGGGACTCGCTAGCGCGCCGTTGGCATCCCGCTGGCCTGCCTCAGCGCTCCGGTGCAGTGTTCTGCCCCTGGCTCAACCGACGCTTTCTCTTGGCTGCTCAATCTCGCGAACTCGTTCAGTTTCCTCTCGTAGTATTCCGTTCAGTTTCTAGGATGTGAGAGCAGCTTTTGCGTTGATGATAAAAGTGAGGATGCTTGGTTATCTGGATTTGTGGTGCTTTATGTGATGCACGTGATCACATATTTCACCAACATCATTGGTGTAGTAACCATTGCTCTGGTCTCCA…
>Zm00001d025533
ATACCAGCACGGGCTCAAGGCTCTGGCTCGCGCACCCCTGTCCCTCCCTGTTCCGCACCGCACACCTAGACTAGACGCACCTCCAACTGCAGCGCGCCATACTTGACCGCATCAGCATGGCATCCACGGGGACGACGGCGGCGGCGGTGCCGGAGGTGACCCTGCGGTCGGGCAACGGAAAGCCGATGCCGATGGTGGGCATGGGCACGGCGTCGTTCCCCGTGGTGCACGAGGCCGTCAGGGACGCCGTGCTGGCGGCCATCGAGGTGGGGTTCCGCCACTTCGACACGGCCTTCCTGTACGGCACCGAGAAGCCGCTCGGCGACGCCGTGGCCGAGGCGCTGCGGCGCGGCCTCCTGAGGTCCCGGGAGGAGCTCTTCGTCACGTCCAAGCTGTGGT…
>Zm00001d025545
GCTCACTCAGGGAAGCTTCCATACCACCAGCCCACCACCATGCCGACCGTGCTGAGCACAAGGCGGGCCGCATCGCCGGAGACGATCTCCCTCCCCTCCTCTCGTTCCTCCCACTCTCGCACGGCGAGCCCGCTCCACCCCGTCTCCCGCGGCAACCGAGCGCTCCGTCTTCTCGCCGCGCTTCGCTCCCCGTCCGCGCCGCGGCCGCGGCTGAGGCGTAGGCCCGGCCTCCCTCCCGCCCGCGCGGGGCTCGCCGCCGCCGCGGCAATGCCGGCGCCGGAGACCAAGGCGCGCATCCTGGTGGCCGGCGGCGGCATCGGCGGCCTGGTCTTCGCGCTCGCCGCCAGGCGGAAGGGGTTCGAGGTGCTGGTGCTGGAGCGGGACGTGAGCGCCGTCCGC…
>Zm00001d025654
GCTCTCGTTCACAGTGCAAGCGAGGCTTAATTGGTAGTAGGCTGCTCTTGTTGCGCCGGCAGCGGCAGGCGGCAGCGCAAAACATTAAACCATCATTTGCGGCGGCGGCTGCTGCCGGCGACGCGATGTCCAAGCAAAAGTCCGTGATCAGGCTGGGCGTACCGAACGACAAGAACCGGTCTAAGGCCATGCAGATGGCATCCAAGTTCGTGGGAGTGAACTCGGTGGGGATCGCCGGCGACGCCAAGGACCGGCTGGAGGTGGTGGGGGAGAGCGTCGACATCACCTGCATGATCAACCTGCTGCGCAAGAAGGTCTGCCGCGCCGACATCGTCGTGGTGGAGGAGGTCAAGGACAAGAAGAAGGAGGAGGAGGAGAAGAAGAAGAAGGAGGAGGAAG…
>Zm00001d025660
CGTCAGCCCCAGCCGAAGGAACATTAACAAACCGCCCGCCGCTTCCTTCACGTAATCTCGCGTCTCCTCCGCCGCCCCCGTCTTCTCCTCCCCTCTTGCTAAAGCAAAGCAACCTGCAACCCGCAATTATTCCTCCCCCGCACGCGAAATCCGCCCGCAGCTCTTCGTCCCCGGAGGACCAAGCCTGCGCACCAGAGATGTCGTACGCCTACCTGTTCAAGTACATCATCATCGGCGACACAGGCGTCGGCAAGTCGTGCCTGCTGCTGCAGTTCACCGACAAGCGATTCCAGCCCGTCCACGACCTCACCATCGGCGTCGAGTTCGGGGCCCGGATGATCACCATCGACAACAAGCCCATCAAGCTCCAGATTTGGGACACGGCTGGTCAAGAGTCAT…
>Zm00001d025662
ATGGCGACAGACACTTGCCTAGATAAGAACCCCCCTGCCGAACAGTCAGTCAGACACCCACCCAGAGAGGCAGCCATGTGCGAGCTCAAGTTCACCAAGGAGCGGGTGGGGTGCTACCTGCTGGTGGTCCTGGTCATCGTCCTCCTCGTCGGCGTCCTCTTCGGCCTCGGCGTCTTCAGGCACGGCTACGACAGGTTCAAGGACCTCGGCCGCAACCACACCTGCTTCGACTGCAACACCACAGGTACCAACCGAGTCTGA
>Zm00001d025690
GTGATCGCAATTCGCACCTGCCCGCGCGGCCCCGACCCCTAGTCCTCCCCACCCATGGCGCGGCGATCCGCCCCTCTCCTGCGCCGCCTCGTCTCCGCCTCCTCACCGCCCGCGCTGCAGTCCCTCACGGACCACGTCGGCGTCCTCGCGCGGCGCACGGTGACCTACATGCCCCGGCCCGGGGACGGCGCACCGCGCGCCGTCACGCTCATCCCAGGCGACGGCATCGGCCCCCTAGTCACGGGCGCCGTGCGGCAGGTCATGGAGGCGATGCACGCGCCCGTCTACTTCGAGACCTACGACGTCCACGGAGACATGCCCACGGTCCCGCCAGCCATCATCGAATCCATCCGCCGCAACAAGGTCTGCATCAAGGGCGGGCTCGCCACGCCCGTCGGC…
>Zm00001d025734
GCGCAAAAGCGTGCACTCTGGTCGCTCTTTCAACTTGGCCATTGCATTATTGCATGCACCTCAAGCAAACCGATCCGTGTAGGGAAAGCAGCATCCTACTGCTACTGGCAAGGGAGCAGGAGCACCGAGCACGTGATTCTATTCTGCCTATGCCGCTAGCCACGCAAAGAAGCATCCTACTGGCACGCCATGCATGCACCAACGCGCCAGAGGCTGCCGTTTCAAAGCAGACGCCGACGCCGTCGCAGACGCGCGCGCAAACACGCCTCTCCCTGCTCCGAGCGATCCCCTCGCGCGCCATCCAACGCCCAGCATCCTCACATACGCGCGGGACGCGCGGTCGACGTACGCGTTTATCATGCGGCCGACGGAGCCGGCGCGGCTGGTCGGGCTCGTCCG…
>Zm00001d025740
TCAGCATTTTCTTATGTCCATGGGTTGCGGCTGATATCTGAGGCTTGAGAACCATGTATGATTACCACTAAAAAGGTTTTTAAGGTAAAATTAGAGCATGATTGCTTTAGAAGCATTGTCTTGCATGTTGGCTCCAACGGCTTTGTTTTTGGAAATTACGATGACAATTTAGTTTGTGTTTGACTGCTCTGTATAATGGCATTGTTATTTACTTTACACTTTACATGCATTTTGACCAATGTGTTGTTGCTATGTGTTCAGGAGGATCTATGGTTATCTGCTTTCCCCGTTGGTACCGAGTGGGAAAACATCGATAAGATAAAGGAGTTCAACTGGAGCTTTGAAAATGTAGAGGAAGCCTTAGAAGAAGGAGGAGAGCTTCATGGGAAGACCCTTTAT…
>Zm00001d025803
ATTACACACAGGGGTAAAATGGTCATTACAGTGGGAATAGCACTAACCCTAGACGGGTAGTCTAACAGAAACCTCGGCTCGCTTGAGGTGACGGCCGCGCGGATTTGTACATCCCAACTCGACTCGCGCGCCCCACCAATCCAACAACAAATGGCGTGCTGCCGGCAGTGACCTGTATTAAAGAACGCTTGGCAGGTTGAGCTGGACATGCGTTCTCTTCTCCGGTGTCTTCCGCTGCATTTTCAGGAGTAGAGAGAACCAAGGGAGGCACTGCAACAAGAATATGTTTGATAGCTACACTTCGTAGAGGAAGAAGTATCCGGGAAGAATGGATGAGACCGGGGATGCTCCTCTGAGGTCCTGCATGTTCCTTGTCGGTGACGAGAAAGAGCGGCTTAT…
>Zm00001d025894
AGGGAGCGAGCGACGACGACGCCAGGGTCGTGGTGCTAGTTGCGGGGTCCCGGCCCGTCGAGTCCGCCTCCGGTTCTCCCCCTTCTCCCGTTGCGGCGACTCCGGCGGCGGAGACAGAGGAGCCTAAGCAGGAGGAGGCGGCGGCGGCAGCAGCAGCAGGTGTGCAGGCCATGGCTGTCACGGTAGTGCGGGACGTCGAGACGGGCCTGGACGCGAGCACCAGCGACCGGGACGGTGACGCCGGGGACAACCCTTCCTGGTTCACACCTAAGAGACTACTTGTCATGTTCTGCATTATCAACATGCTGAACTATATTGATCGAGGAGCAATAGCAAGTAATGGCGTCAATGGTACCCGCAAAAGTTGTTCGGGTGGTACATGCACCTCAGGCTCAGGAA…
>Zm00001d025923
CGGTTGCCATTCTTTTCCTGTAACCGAACCCTGAAGGGTAGCGTCATCATCCAGACCACCATTACCAGAGTGCTCTGCTCTCGCTGGAGGCCGTGGTTCATTCACGTTCATGGAGGCCGCCGCCATTCCCACCAGTGCCCCGGAAACCAGGATTGCCGTTGTCACCGGCGGCAACAAAGGGATCGGGCTAGAGGTGTGCCGGCAGCTGGCCGGCGCCGGCGCCACCGTCGTCGTCTTAACAGCCAGGGACGAGACGAGGGGTGCAGCCGCTGCACAAGAGCTCAGAGAATCTGGGCTCTCCGATGTCATCTTCCATCAGCTGGACATCACCGACGCTGCGAGCGTCAGTCGGCTGGCTGAGTTCCTCAAGGCTCGTTTTGGAAAGCTAGATATCCTGGT…
>Zm00001d025943
ATGATCCCGGCCGTTGCCGATCCGACGACGACGTTGGACGGGGGCGCGCGCACGCCGTTGCTCCCGGAGACCGACCCTCGGGGGCGCGCTGCCCCCGCCGGCGCTCGGCAGAATCGGCCGGCGGCGGCGGCGGCGGCGACGGCGACGATGACCGTTCTCACCGCCGCCGTCTCCGCTGTGCTCCTGCTCGTCCTCGTGGCGGTCACGGTCCTGGCGTCGCAGGAGGGAGTCGACGGGCAGGGTGGCGGGGGCGTCGTCGCCGTGGAGGTGGCCGCCTCCCGTGGCGTGGCTGAGGGCGTGTCGGAGAAGTCCACGGCCCCGCTCCTCGGCGCCGGCGCCGGCGCCGCGCTCCGGGACTTCTCCTGGACCAACTCGATGCTGGCGTGGCAGCGCACGGCG…
>Zm00001d025947
ATGCTAAGGAGGTCCCGCCACGGCGGGGTCCGTCTCGGCCGGAAGCTGCTCGGCCTGTGGCGTCGGGCGCTGTGCGGCGGGCGCCGGCGCCGGCGCCGGGGAGGCTACCGCCGCCTGAAGCAGCAGCAGCAGCAGCCCTGCGCCGGCACGCCCGAGCGCGCCGCGAGGAAGCTCGCGCCGGCGCTGCTGCGGTGGGGCCGGTCGCTGGCGCGGCGTCTGCGCCTCGGGTGGAGGGCCGGCGGCGGGCGCCGGATGCTGGCCGGCGCCGAGGCTGAGGTGGCCACGACGCCCAAGGGGCAGGTTGCCGTGTACGTCGGCGGCGGCGGCGGGGAGGCGGCGCAGTCTCTGCGGTACGTGGTGCCGGTGGTGTACCTGAACCACCCGACGTTCGGCGAGCTG…
>Zm00001d025980
ATGGAGAACAGGGACCTCGGCAGGGAGTTCAGCGGTCATGGGATGCGTGCTGGAACGAAGAATAGGGGCGAGCTCCATGGGAAGCCAGGGGCTCGGATGCCTACGGCCGGGGAAGATGCAGCACGGCCAGCGAAGCTCGCGGGGAAACAACGGCCGACTCAAGGAAAAGTCAGGGCGCAGTCCGGGCCTAAGAAGCAAGAGTCGGCTGCCACAGCGAGAGGGGCTGCCAAGAAGCCCGCTGGCAAAGCGGCTGCCCCTTTCGCCGTGTACTTTGTGCCATCCCGTGAACCCATTCCCGCGCTCCCCTTCGCTACTCCAGCAGCCCAGCAGGAAAGGGAGAACATGGTGGGGAAGAAGAGGGGTATTATCTCCCCGCTGGACCATCTCGCTGGGCTGCTG…
>Zm00001d026016
CCGAATAGTAAGGCAAAGCCGCAAAGGCTTATCCTTCCGAGTTTCCACCCTTTACAATGGCGAGCGCTCCCGCCGGCTTTGCCCCCACCGTCGCTGCTTCCACAAGCTTCGGCTTCAGCCGCTTCACTATCGTGGCATGCCCCTTCCCCTCGCGCACTCATCTTCCAGCGGCCTCCTCCGTTGGGGTTCGCAATCAGCAGCGCGCGTCCACTGCCACCGCCTGCCTGCCGCCGCCGAATACCTCCCATGGCGCCGCCACCAGGCTGTACGTCAGCGGTCTTTCGTTCCGCACAACCGAACGGAGCCTCCGGGACGCGTTCGAGAAGTTTGGTGACCTTACGGAAGGTGACAGAGCCCGAGATGAGCGAATGTCTGTGTTTTAAATTCAGAATTATTGAA…
>Zm00001d026018
GTCAACGTTAAATCCCTGCTCGTCCCCGTCCCGACTCCCGACCCAACCCATATCAGAGGTTCCGTCCGTTGGTGGCGCTGGCGTTCCCGTGAGTCGGCCCGCGCGCGAAGGCGGCCGTGACCGACCGTCCGGAGCTTCATGCGCCAGGGGCGGCGGCTCCACCCCGTCGTTTGATGGGCAACGCATGCGGCGGCGCCCTTAGATCCAAGTACCAGCACAGCTTCAAGCACGCCGCGTCGTCGCAGCGCCGCGCCTCCTCCGAGTACAGCGCCAGCGCCGTGGCCGACGACTCGCCCAGGAAGCCCACGCAGCCGCCCGCCACCACGGACGCCCACGCGCCGCCACCGCCGCCCGCCACCGCCGCAGCCGCCATGAGGCGCGGCGGGGCCGGCGCGCCGC…
>Zm00001d026060
AGGGCACCAGAAGCAGCCAGCAAGCTCATGCCCTTCAAAAGCCTCCGGCAGCCCAGCGCCCCAGCCAGCTAGTGGTGATCTCTCATCTCAGCAGCGCGCCTGAACGTGTGCTCCCTGCTAAGCTCTGCGCCTCGATAGGCAAAGGAAAATCAAACCGATCGTCGTCAGATTAAATGGCCGGTAGCAGCGCGGAGCAGCTCCTCTCCAGGATCGCCGCCGGCGACGGCCACGGCGAGAACTCGTCCTACTTCGACGGGTGGAAGGCCTACGACATGAACCCTTTCGACCTGCGCCACAACCGCGACGGCGTCATCCAGATGGGCCTCGCCGAGAACCAACTGTCGTTGGACCTGATCGAGCAATGGAGCGTGGACCACCCGGAGGCGTCCATCTGCACGG…
>Zm00001d026072
ATGGCCGAGGCGGAGGCGAGCAGCAGGCGGCGCCGCTGCGGCGGCGCGGCGGAGCTGTGCGCGACGGCCGCGCGGCTCGCGGACGCGGCCTCGTGGTGGTGCGCGGTGGCGCTCGTGGCGCTCGTGCTGCTGGGCGCGCTCCGCGCCGAGACCGACGGCGTCGGCGACGGCGACGGCGGCGGCGCCTACCGTGCGCTCCGGGGCCCGCGCCTGGGCGGCCCCGCGGCGCGGCCGTGCGAGGAGGTGTACGTGGTCGGGGAAGGCGAGACGCTGCACAGCATCAGCGACCGGTGCGGGGACCCCTTCATCGTGGAGCGCAACCCGCACATACACGACCCCGACGACGTCTTCCCGGGGCTCGTCATCGCGCTCTGCCCCACCAGGAACACCTAG
>Zm00001d026096
ATGCTGATGGCGGCCAGCGCGGGGGCTGCAAATCCGAGCCAAGGCTCGAATCCGAACCCGCCGCCGCTGGCGGCGCCCCTGACGGACGCGGGTAGCACCGAGCGGCGCGCGCGGCCGCAGAAGGAGAAGGCGCTCAACTGCCCGCGGTGCAACTCCACCAACACCAAATTCTGCTACTACAACAACTACAGCCTCCAGCAGCCACGCTACTTCTGCAAGACGTGCCGCCGCTACTGGACGGAGGGCGGATCCCTCCGCAGCGTCCCCGTGGGCGGTGGCTCCCGCAAGAACAAGCGCTCCTCGTCCTCGTCCTCGTCCTCGTCCTCGTCGGCGGCGGCGGCGTCCGCCTCCACCTCCTCCTCGGCCACGAGCTCGTCCATGGCCAGCACACCGGGGGCG…
>Zm00001d026097
GCAACGTGTGGCTACGCCAAAATGTCCATCGCAGGGCACGAGCGTTAGGAGCGTCGGGCGCGGGGCTCGGGGGCTGTGGGCGGCGAGCAGCAGGACGACCAGGGGCTGTGGGCGGCAGATCAGATCTCCGCGTTTCTGCTCTGTTCCTCTGCACTTCCACTCCCTCCTGCATATACGAACTCCTCCCTTGTTTCAAAGTCGCAGGAGTAAAACGACAGAGCTAAAACGAAAAAAAAAACAAGGACCAAAACCACGATTTTGCTACAAAACGGGGCATGAATTCTTAAGCCCCAAATGTTTAATCCATACCCATCCTAGTACGTTCGGTAACACGACTGAGATTCCCTTCGTTTCTTTCAACTTTGTCCAGAGTGATACTAGCTAAGATGCGGATGCAGG…
>Zm00001d026124
AGGACGTTTCCACCTCCATCACCGCTGGTCGGCTATGTGCATCGCGGCATGGGCGTGGCACTGCCACCCGACGCACCGCCTGCTTCTGCTGTTCAATCGCGACGAGTATCACTCCAGGCCGACGCAGCCGGCGCAGTGGTGGGCGGCGGGGGAGGAAGCCAAGGAAATCCTTGGAGGCAGGGACGAGCTCGGCGGGGGAACGTGGATGGGGTGCACGAGGGATGGTAAGCTCGCCTTCCTGACCAACGTGCGGGAACCCAGCTCTCTGATCGGGGCCAAGACCAGAGGACAGCTCCCGGTCAGGTTTCTACAGGGCAGCCTTTGTCCATTGGAGTATGCCACAGAAATTGCAAAGGAAGCAGATCAGTACAACGGCTTTAACCTTATATTGGCTGATGT…
>Zm00001d026137
GCACAAGTGATGGTTGAGAAGAGTAGACGGAACGGGACCCAACCCACCCTAACCCATCATTCATTCATTCTCCACTAGAAGCACGGGTTACTGCACCCATGACCTGTAGGTGGTGGTGCAAGATACTTCAGATAAAGATATATATGTGCGTGTGTGTGAAAGACAGAGAACCTGGCTACGCCTCAATCTAGCCGGGAAGAACAGCTCCACGGAAGAAACAAAGGCGGCAGAGTGCTAGACCGGCCATCCGCGTGCCAGACTGCCAGTGCCCTCTCCTCTGCAGCCACCAACTCCTGCTTCCCAGAAGCTAGATCTGGACGAACATGGCAGCAGTCCCGGTCTACAGCATCACAAGAGCGGAGATCGACGAGTTCTGGAGCAGGAAGGAAGTGGAAGCAG…
>Zm00001d026139
AAGCTAGCAAAAGGATATGATCCAGCAGCTGAGCATCACGCCAAGCTTTGCAGGCAGCCTTCTTCATATCCTCGTTCTCCATCCTCTGCTCCCAAAAGGAGCTAGCGCTAGCTAGGAAACACACAGAGAGACGAAATAAGCAGCGAGGCAATGGGCAACTGCTTCACCAGGAAGTACGACGAGCACGAGCACGAGCACGAGATACCAATCACCACGGACCCGCCGCGGCGGACGTCGATGCCGGTGTACCGGCCGCCCCGGCCCCGCGATGACAAGACGCGGGAGGTGCCGCTGTACTCGGGCTCGGACCGCCGGCCGTCCTACCGTCCGCCGCGGCTTCCAGTCTTCCCGTCGGGCCCGGGATCGACGGGCCGGCGGCGGCCGCCCACCGGCCAGACG…
>Zm00001d026154
GTCAGCTCCGCCGCTTTTGCTTTCTCTCTCCAGGCTCTCGGCTTCGTCCACAAGCTACAGCCGCGCGCTCCTCCTTGACCCGGCCTGACCCCGCTAGTTCGCCGCCTGCCGTCTGCCGCCCCAGCATGGCCGCCGCGTCGTCCGCCACCTCCGTCCACGACTTCACCGTCAAGGATTCGAGCGGCAAGGACGTTGACCTCAGCGTCTACAGGGGGAAGGTTCTTCTCATCGTTAACGTCGCATCCCAATGTGGCTTAACCAACTCCAACTACACTCAGCAGGCCCAGCTCTATGAGAAGTACAAGAACCAAGGCTTGTTCTTGATTCATTGCTCTTGCTTTGAAATCCTCGCTTTCCCGTGCAACCAGTTTGGTGGGCAGGAGCCTGGTACCAACGAGG…
>Zm00001d026156
GCCCAGAAAGCTGGCCTCCTCCGCCTTTCTTTCCTTCCTCCCTCGGGGCTCCGCGCGCGCAGCAGCCAGGAACAGCTCCGCTGCCTGCTCCCTTGGGGAAAAAAAACTTCAAGAACAGCGGCGGTCGGCTCTTCTCCAATCCTGCTTCAAGGTTCGCGCGCGTCCCGTGTTCTGCCACTTCAAGGCTATACGATATTTAGGCTGCACCGACCGGCTCTATTTGAGCTATATCTCTGCAGGAAAGCTCAGTTCAGATCCATTCACTTCACTCATGGGCTCATCCTCGGGCCATCAGAGAAGCAAAACGCGCAGCAGGAACAGGAAGCCCTTGGGAATTCAGCTCTTGGAGCGGGTCCGTGGCAGCCCCATCTCCTTCAGATCATGCCAGGCTCTCGTGCT…
>Zm00001d026164
GCAGCCGCCGCCGCCGCCTCTCTCTCCCTTCCCTCTTCTCTCTGCCCTCACCTCTCTCCCCCTTCCATCACCTCGCTAGTAACAGGTCACCGTGTGTGTGCGCGCCATGGGGATTCATCTGCCGCCGCCTGCCCTCGCCTTCTGCCTCTCGGCGCCCACTCGGTTCCAGTGGCCGCTTCGAGGAGGCGCTCGCGCGCATCGAGGAGCTCCAGGAGCGCGACACTGGCGCCGACGACAGCAGCACAGCCTCGTCGTTCTTGAGCGACGGAGAGGCGGCGTCGCGGCCAGCAGGCGAGCAGCAGTCGCACTCCGCAGATTTCTTGAGCGACGGAGAGGCGGCGTCCGGTGGCATTCAGAGACGTGCGTGACGGTCGGAGGTCGTCGAGCGCGTGTAAGCTT…
>Zm00001d026182
ATGGACACGGACGACGCGCAGGAGCCGGCCACCCCAACCTCCCCGTCCCCGTCCCCGTCTTCGTCCTCCTCCTCCTCCTCTTCCTCGTCGTCGTCCCCAAAGAAGCGGGCGCGCAGGGACGGCGGGCGGCACCCGACGTACCGCGGCGTGCGCATGCGGAGCTGGGGCAAGTGGGTGTCGGAGATCAGGGAGCCACGCAAGAAGTCCCGCATCTGGCTGGGCACCTTCGCCACCGCGGAGATGGCCGCGCGCGCGCACGACGTGGCCGCGCTGGCCATCAAGGGCGCCCGCGACGCGCACCTCAACTTCCCGGGCCTCGCGCGCCTGCTCCCGCGCCCGGCCACCGCCGCGCCCAGGGACGTGCAGGCCGCGGCGGCGCTCGCCGCGGCCGCCGACTTC…
>Zm00001d026187
GGGTTGTATAGAGTGCCAACTCCAGCAGCTGAATCGATCCCCGAATACCCTAGTGACGGCGGCGGAGATGGACGACCGAGGCGGCGGCGGGGACGCCAAGAGGTGGCCGTGGTGGGCTGCGGCGAGCGCGGCACAGGCCGCGGCCGGGCTCGCGTGGTTCCGACGGGGCAGGAGCGGAACGGCAGTGGCGATGCCGTTCAAGGCATTCGGCATCGCCTCCCTCATCGTCGGCTCCGGCGCCACCGCCGTCGCCGCTGGGGTGCTTGCCGCGGGCGTCGGATCGGTGGAGGAGATGAAGGGCGTGGGCGCGAGCATCCGGCGGTGGATGGGAGCTCCTCCTCGCCGAGCGGGAGGTAGTGACTAACCCTCGCACTGCAACTGTGGTCTGTCTGAACCTCT…
>Zm00001d026200
AGAAGAAAAGTGCCCCTACACTGCTACAGACAGAGAGAACTCACATTGCGGTTGCGGACCTCAGCTTGCCCACTACAGAGCTAACCAAAAGAGATGAAAGGGAGCCTTTCCCACGAGCTCGAGACGGGGCTCCCAGCCGCCGACGTGTGGGAGGTCTACGGAGGCCTCCTTGTTGGGGACTTGATTCCCCAGCTGCTTCCTCAAGTTTTCTCAAAGGTTGAACTCGTAGAGGGAGACGGTGGAGTTGGAACGGTTCTGCTCGTCACTCTCCCGCCAGGGACTCCTGGATCAGAGGCTTTCAAAGAGAAGTTCGTCAAGGTCGATGACGAAAACCGCGTCAAGGAGTGCCTGGTAACCGAGGGAAGCTTTTTTGACCGTGGCTTCAAGAAATACCTGGTG…
>Zm00001d026222
ACGCTCCCCGTCGTTCGTATTCGATGCGCACCTCAGTCCTCAGCTGAGCCGAGCGGAACCAGCTCGCACGAGAGGAGGCGGCCAAACGGAGAGGAAGTGAGACCGAGGTGAGAAACTGACAGGACAGGAGGACAATCGCCGCCGCCCGCAGCAAGAAGAGAGCATGGACTTCCTCACGCTTCCCCGCCGCGATCTGCAGGCGCTGTGCAAGCGCAACGGCATCCGCGCCAACATGACCAGTGCCGCCATGGCCGACGCCCTCCGCGCGCTCCCCAAGGTCGAAGGGATCGAGGAGTACGTTAAGGTTCTGCAGCCGGTCTCCGTGCTGCAAACGGCGGTTAAGCCGGTGAATGAGGAGCAGAAGCAGGAGAGTCCGCTTCCGCGTGGCCGCCGCGTCAC…
>Zm00001d026244
AAGGCCACTGCCCGGACGGAGCTTCCGAAAGGGAACCGGGCAGCGGCAATGGAGGGACAGCCGCTCCATCTCCTCATCGCCCAGTTCCACCACCCTTGCCTACGCGGTCTCATCCCCAACTACCCTACCCACTACCTGCCCACCTCCCGCCTCCGACTCCGCGTACAGCGTCGCAAGCCGAAGCAGCTCGCCGCAGTGCCTTCGAGGCGTCCATCGGGCAGCCAAGCCGACGCGCCTGGCCTGGTGCCGGTGCCTAACACGGTGGCGGCGCTGGTGCTCCAGCTGACCGTGTGCTCGCTCCTTTTTCTCTTCCCCAACCGTGCCCGAGCCCTCGCGCTCCCGCCCCCTCCGGGGGCCGCTGCGGTGGTTGAGGCGACGCAGGAGGAGGAGGAGGAGGAC…
>Zm00001d026255
ATGATGGCGGCGATGGGCGGCGCGGTGCGGGTGCTGTGCGGCGCGGAGAAGGAGCGGGTGGTGGGCACGCGCAAGGCGCCCGGGGCGTGCCCGCGCTGCGGCGGGGCCGTGGTGGCCGTCGACGTGGAGAGCGAGCGCCGCTTCCTCGGCCTGCCGCTGTGCCTCCAGAGCAAGCGCAAGTACTCCTGCACCCGCTGCCTCCGCCGGCTCGTCACCCTCTACAGCTGA
>Zm00001d026277
GCAGAACCCCGGGAGCTCGCTCTCGCTCCCTCCACCTCCCTCCCCCCTTGACCCTCCCAGCCGCAAAACCGCAGGCCGCATCCCGCCCGCCGCCCGCCGCCCACCTGTGGCAACCGCCGCCTACATAAACGACCAATCGACCACTCGCCGAACCAAGCCACCCACCCAAAACCCAATGGCGTCCAACCTCCTATCCGCGGTGGCAATCGAGAAGGAGACGCCGGAGAGCGAGCTGCCCCCGACGTTCCTCCGCGAGGACGGGCGCGGCGCCGGGTCCGTGCGGGCGCGGTTCGAGTCCATGATACGGCGGGTGCAGGGGGAGGTCTGCGCCGCGCTCGAGGAGGCAGATGGCGGTGGGGCGCGCTTCGTCGAGGACGTCTGGTCGCGCCCCGGCGGCGG…
>Zm00001d026295
GAAAACCCCCCAACGAAATAAAAAAGATTCTCTCTTCTTTTACCCTCTCCGCCCGCTTCTCTCTCTTTGATCTCTTTTCTTGCCCGGCTTCTGATCTCTGCTCGCCTGCCGCCTGCAACCGCCGAGGGAGGAGGGGAGGCAAGAAGGATCACGCCGCCGGAGCGTCATCTCTTCCAACCCAAGGTGACCTTGCGTTTCTTCTGATTGGATGGAAAAAACTTCCGTTGTATTGATTGAAACGGCAGATTTTTTTTCCTTCCTAATTTCATTCTCGATGGGTCCGATTGCGTTCGGGGCGTTATTCACTGTCCACCAGTGACCCGCCCTCCGGTTTGGTCCTCAAGTCCTCGCTTCGCTCGCTGCTGCCGCTGCCGCCATTCCGATCGGATTTGGCTCTGC…
>Zm00001d026297
GCATCCGCCATCGGGCCTCGTCGATCGCCGCCTCCTGCTCGGCTTCTTCCCACCTGCGGTTGCACCGATCACCCAGGGAGGGACAGGGCAGCTCGCCGGTCCAACTCCGACGACCGGCCGGCCATGAGCTACCAGGCTCCTCCTCCCGGCACCGCAGCCTACCCGCCGCCGGGCACGGCCTACCCGCCGCCAGGCCAGCAGGCGTACCCGCCGCCTGCCTACGGTGCGCCGCCACCCATGGCCGCCGGCGGGTACCCGCCCCCGCCGCCTCCGCAGCCGCAGGACTCCAAGCGCAGCAACGACGGCTTCTTGAAAGGATGCTTGGCCGCGCTCTGCTGCTGCTGCATGCTCGACATGTGCTTCTGA
>Zm00001d026300
ATGGTCAAGGAAGCGCCGAGTTCGTCGGGATCCGTTGAACGCATCACATCTAGTGAATTGGCCGGAGTAGAACCACTAGCATCCACACTAGCTGCGACATCTTCTGTTGGCACACGAGTGCCAATGCAGAGACCTGACTGTGGTGGCGCATTATCTCAAGCAAAGGTCAAACTCTTGGTGAATCACTTTATTGTCAACTACCAAAAGGTGTCAACTATTTTTCACTATGACATAAACATCAAGCTTGATGAAGCTTCCTCTAAGGCTTCAGGCAAAGAACTCTCGAAGGCAGAATTTCTTTCTGTCAAGGATGAGCTCTTCAGGGAAAGCAGTTTACGGCGTCTTTCCTCATGTGTTGCTTATGATGGTGGAAGAAATCTCTTCACTTCTGCTGAACTG…
>Zm00001d026305
AGCTCCACTCCCGCGGCATCCCTCATCACGGCCTCCACTTCTCCGCCTTCTCCGAGTCAGTTCCCCTCCGCGCCCACAACCCCCGCCGCGCCCACCCCCACTCCCGATGCGTCCGCCCCAACGCCGATAGTCCTCGCCCCTCCCCTCCCCGTTGCGCCCACCCATGCCCCCTCCGCGCCCGCGCCTCCCCTCAACCACCGCACCGAGATCGCCGCCGATCTGAGCTCCCCTCCCCGTTGCGCCCACCCATGGTCGCTGCTTCGACTTGCTGTTGCTGCTGCTCCTGCACGACGACCAATGAAGGGAACAACGTGGTCTGCGCGGGCATGGTGGGCGCGTGGAAGGAGAAGTCGTTGAAGGCGCCGCCGACCGCAGCTCGGCTGTCGTCTTGCTGTCGTC…
>Zm00001d026360
ATTCGGCACTCACTTCTGAAGAATGACAGCCGTGGCCCTGGCGCTGCCCACGGACGACGACAAAGACGGCGGCCGCCGAGGCGTCGACCACTCCCCGACGGCTCCCGCGCCCCCTCCTCCGCCGCCGCCGCCCCAGGAGCTGGTCATGGTGGCGCGCGCCGTGCAGCGGCTCGTGGCGCGGAACGACGCGGTGGTGCCGCCGGCGCCGGACGGGCGCGGAGGAGGCCGGAGACTCGGGATGCGGGCGTTCGAGGCGGCGGAGGGCGCGGCGGCGCCGCGCATCGGCGTGCCCGAGTACCTGGAGCGCGTGCACCGCTACGCCGCGCTGGACCCCGAGTGCTACGTCGTGGCGTACGCCTACGTGGACATGGCCGCGCACCGCCGGCCCGCCGCCGCCGT…
>Zm00001d026376
CTTAACTCTTGCATTAATTGGCTATACCAGATCATATCAAAATTACCCGAGGATATGACCGTGGTGACATCCATTGACGGACACCCCACCAAGACATGGATCGTGATGACTTATAAGGGAGGGAAGGTTTCCGTTTGGGACTATCAGGAGAAGAAAACTGTGATGGAGTTGAAGGTCAATGAGGAATCAGGCAAGATTGCTCGTATCGCGCATGGCATTTCTCAAAACTTCAAAGAGACAGGTGTCCCACATTCAGTTTGTTCAGCCAAATTTATCGCTCAAGGGAAATGGCTGGTAGTGGGAAATAGTGATGGATACATATATGTCTACACTTACACTGACACTAAGCTTAAGGAGGCCAAGAAATTCAGAGCTCATGACAACTCTGTCGACGTGTTG…
>Zm00001d026392
ACCTGCTCTGTTTCTCGGCGAGTTTTTCCCACTTCCACCTCTCCGTCCCTGCCGAGCTGCGGCGGCCGCATCGACTGTTAGGGCGAAAATCCGTTCTAGTCTCTCGGCGATTTTCGGCAGGCGGAGGCAGCAGGATCTGCGGGAAGGATTTCGTGTCGAGATGGCTGGGCGCAAGGAAACTGCACTCGACCTGGCGAAGTTCGTCGACAAGGGCGTCCAGGTGAAGCTCACCGGCGGCCGCCAAGGTTGATTTCACATCCCTCCACCCTTTCTCCTCCTAATTTGCACATTCTCCTTGCAGCAGCGTTGAGCTATTGGTTACTGTTAAATGGAGTCCTACGATAGTCTCTATCCATCGATCGATATAAATCGGATGGATAAATATCTTGTTCATGGGCT…
>Zm00001d026412
GGAGCACACACCACCACCGCTGCTGCTCGCCCTCATACATATATAACCGGAGCTAGAAGCTTATTACTCGGATTAGCATTTGAGCTTAAGGCTCGATTCGTGAGGAGTAAAGCTAGCAAGAAGCTCCAATAGTCGAGATCGAACGAACACGGAACACATGGCCAACTTGGCTGCTCAGATCAAGGACAAGTTCCTCGGCCTCGTCGACCGTGTCACCGACGCCGCCGCCGGATTTGGCCGCGCTGCCGGAGGCAAGGACGACGACGTACAGGACCCCACTACTACTAAGCTGCACCTGCACGCCGTCCAGCGTGCTGAGGTTATTATTAGATCGCGAGGAGGAGAACCCGTCGTGGACACAGGATCGACTGCGGGGGCCAATTAACAATGCCGCCCGTT…
>Zm00001d026421
GATGCCCTTGCCCTCCTTGATCCCCGCTAAGGTACTCACCATGAAAAGCCGTATCTGTCTCGGCGGACAGGACCCGCTCGTCACTGAGACCGGGACCCGCAGAGCATTGCTTGACCGCTGGCCCGCCTCCGCCTGTTAGAACCACCGGGCATCGTCGACGCCGCCGGTTGCCCATTAAACCCCCGTCCCCGTCTCGAGGTGATCATCCCGCAGCGCTACAACGCCCGAACTCTCCGTCCCTCACTCTCAGTCTCCGACACATTCTACGAACCGCCTCCCACTACCGCTCATTGCCGCCGGTCGCCGGAGACGCGCTGCACCGCCAGCTGTCCGCCTTCGCCCGCCGACCCCGGCCTGCCGCAGCTTCCCCTTCACCCGCCAGGGTATAAGCTGCCAGTG…
>Zm00001d026442
CCGGACCGAAACCGCCGCTTCCCCTCCCCGCTCTTTCTGTGAGGAGGGAAGCGAGGCGGATGCCGAGGCGACGGGGCTCGCGCACCGCACTCGTGTGCCCGCCGCCCGGGGACCAGGCGACGTGGTGACTGGTGAGGTGAGGCAAGCGCGCGGTTTTAAATTCCCCGCACGTCCTTCTCGCCGTAGTTTTCAGTCCGGAGGTACATCAAGGGAGGAACAAACGTGAGGGCTGCCTGCCTCCGGACATGGGCTCCAGCTTCAAGTACCGAGCTGGCCTCTGCCTCATCGTCGCCGTCGTGCTGATTTGGGTCATATCCGCGGAGGTCACGCAGGACAAGCAACTTTCGACTAAGGAGATTGCAACTTATGGATTGTATCTTTGCCCCTTATGGTTTGTGA…
>Zm00001d026447
ATGGCTCCTCTGGCGGCCGCGGCGGTGAAGATGGAGGCGGAGCAGGCGGCGATGGCGGCGCCGCAGCTGGGGGCGGCGCACCAGCAGACGCAGCCGCGGCGGCAGTACCGCGGCGTGCGCATGCGCAAGTGGGGCAAGTGGGTGGCGGAGATCCGGGAGCCGCACAAGCGCACGCGCATCTGGCTGGGGTCCTACGCCACGGCCGTGGCGGCGGCGCGCGCCTACGACACGGCCGTGTTCTACCTGCGCGGGCGGTCGGCGCGGCTCAACTTCCCCGAGGAGATCCCCTCGTTCGGGCTGGCGGATGGCGTGGACGTGGGGGAGCACGCGCGCGACCCGGCCGCCGCCGCCGCCGGCGGCGGCGGCGGCTGCACGCTGTCCGCGGCGTCCATACGGAAG…
>Zm00001d026467
ATGGACAACGGCACCATCCTCTCCGGTGAGGCTGCTATGAACCACGCCGCCGTCAGCCCCGGTACGGCCATCTCGGGCTTCACGCGCCTCCTCAACCAAAAGCTCAAGGACGATTTGGTGAAGAGCGAGATGAAGCTTTCGCCATCGTACAAGTTCTCCGAGAGGGAGGGACGGGCCGCCATCCAAATCCAAGCCGCCGGCGGCGGCCAGGTCATAGAGTTGTGCCCCCTAGATCTCGCCGACATCCTCTTCTCCGAGCTGAAGCACAGGGCGGAGGCTCACCTGGGCTGTGAGCTCTCGGCTGCTATCATCGCCATGCCGCATCACCTCAACTACAACGGAAGGCAGGACGTCGTCAATATGGCAAGGTACGATGCTGGCTTCCGCCGGGCCGCCAAG…
>Zm00001d026489
ATGAAGAAGAAAATCGTGAAGAAAGTCCTGGAGGAGATTGAGAAAAAGAACCGCGAGATGCAGGCCAGCAACGCCGTGGAAGATGTGGCGATCGAGGTCGGGCCAGTGGAGACGTTTCTCAACCAGATCCTCAACGAGAAGCCGATGCGTTTCAGCTCCGAGCAGCTGGCGGCCTGCACCCGGAACTACTCGTCGGAGCTAGGGTCCGGCGGCTACGGCGTGGTCTACAAGGGCGAGCTGCCGAACGGCCTGCTGGTGGCCGCGAAAGTCCTCAAGGTGTCGTCCATGAACAGGAAGGTCCAGGAGGCGTTCATGGCGGAGATCGGCACCATCGGCCGGACGTACCACGTGCACCTCGTCCGCCTCTACGGCTTCTGCTTCGACGCGAGCACCAAAGCG…
>Zm00001d026498
ATGAGAAGCAGGCGGTGGTCCCGCGCCGCGGTGCTCGCGTGGCTAGTGCTGGTCGCGGCCGCCGCGTGCGTCGCCGACGAGTCGCGCGCGGTGCCCGCCGCCAGGAACCGGACCGGGACCGGGACCGCGGCCGTCAGTGTCAGGCAGCAGCAGCAGCAGCGGGGCGCGTTCGACGTCGTGGTCGCCGGCCTCGTCAGCATCGGGCTCGGCCGCCGGTGGCGCGCCGGCGGCATGGTGGACGAGGACAAGCGCCGCGTGCCCACGGGGCCCAACCCGCTGCACAACCGATGA
>Zm00001d026505
ATGACGACGTCGTCCAGCGAGGTCACGGTGTGCTCCCACCTGTTCACGGTGAGAGGCTACACCCACACCAGGGGCATCGGCGTCGGCAGGTCCATCGAGTCGCAGGCGTTCGACGCGGCCGGCCACCGCTGGTCCGTCGTGTTCTACCCGGACGGCGACGACCAGGACGCGAGGGGCCACATCTCTATCTTCGTCAGGCTCATCGGCAGCGGCGGCGCCGGAGACGTCACGGTGCTCTACGGCTTCAGCCTCGTCGACCCGAGTGGCGCCGCGCCGGCGTCGGAGGCCTCCAAGGCCCCCAAGGTCGCCACGTTCAGACATTCGGCGGGCGGCGACTACAGAGGTATCGGCCGCTTCATGGAGCACCAGAGGTTCGAGGCGTCTCCGTACCTGCGGGAC…
>Zm00001d026521
AACTGAACGAAGCATCCGGTGTGTGCCCTCGTCATCCGCCGCCGCCGCCATGCCGGGCTTCGCTCAGCGTCTCGCGGGCATCCCGTGGCGGAGCATCGCGAGGCAAGGCCTCTCCCGCGTGTTCCTGGTGGCGAAGGCCTACTGCGTGATCCACGTCGTCAACGACCACCTCTGCTCGGTGACCTTAGTGCGGGGCGCCAGCATGCTGCCGTCCCTGAACCTGGCGGGCGACGCGGTGGCGGTGGACAGGGTCAGCGTGAGGCTCGGCCGGGTCGCGCCGGGGGACATCGTGCTGATGATCTCCCCCGAGGACCCGCGCAAGTCGGTCGTCAAGCGCGTCGTCGGGATGCAAGGGGACTCCGTCACCTACCTTGTCGACCCCGGCAAAAGCGACTCCTC…
>Zm00001d026522
ATGCGGCGAAGAGCCCACACCGGCGACGAATTTCGGTGTCCCGACTATCCCGCCAGCTCCCGGGACCCCGCGCCCAGATTCTTCAAGGCACGACTGAAAAATAGCCAGCAATTTTTCATGTCCTTATACTCAGTTATGATTTCTGATGACGTCATATTAGACATCTGTGCAGAATCTGGAAAAGAGAATCCAAATGATGATGGTCCTGAAAATAACCCTCAGTTTACTACTGTTTATGTTGGCAATCTTCCTCACGAGGCTACCATGAATGATGTGCGCCTGTTTTTCCATTCACTGGGGGCTGGTTCAATTGAGGAAGTCCGTGTAACTCGTGATAAAGGCTTTGGCTTTGTGAGGTACAGCACCCATGAGGAGGCTGCATTGGCAATTCAGATGGGT…
>Zm00001d026528
AAGGCCGCAACGCCTCCGCTTTCATTCTTCTTCTCTTTTCTCGTTCCCCCCGTTGGGGTTTTGAGCTCCGACGAACCCTAATAATCGCCGGGGACCGGCGACCGATCGCCCGCCGGCATGCACCATTAGCAGCGGATGAAGCAGGCAGCGGCGGCCGCGGCCGCGGCGCAGCAGGCACTGCTCCTGCAGCAGCAGTCGCAGCCGCCCTTGTTCCCCGTGCACCACCCGCACCCCGGCCTCCTCGCCGCACCACAGATAGAGCCCATAGTCAGTGGAAACCTGCCTCCTGGGTTTGATTCAAGTACATGCCGCAGCGTGTATGTTTGCAATATCCATCTTCAAGTGACGGACGCAGTACTGCAGGAAGTCTTCCAAAGCATTGGTCCAGTAGAAGGGTGC…
>Zm00001d026531
CCTAATAATAGTCGCCGCGGGCAGTGGATACCGCGACCGCCACCGTCATGGGAGCGCTCGAGGGGGCCCACCTCGCGGCCGTCGCTTGCGCGTGTGACGATGACGAGGAGCAAAGCGACTGCATCCCCCTGCTCGCAGGGGACGCCGCGACGGCGGCCGACGCCATGGAGCCGGCGGTGCGCGCGCTCCTGCTGGGGCTCGGCGAGGACGACCGCCGCGAGGGACTGCGCCGGACGCCCAAGCGCGTCTCCAAGGCCTTCCGCGACGGCACCCGAGGTTACAGGCAAAAAGTGAAGGACATAGTGCGGGGTGCTCTGTTTCCAGAGGTTGGTGTGGACAAAAGGACTGGGTCTGCTGGTGGAACTGGCGGGCAAGTAGTTGTCCGAGACATTGAACTTT…
>Zm00001d026562
GTGGGAAAGGAAAGCGGAGGAGGAAGAGGAGCCAAGCCGCTCGCCTCAACACACCCCCACCCAAGCAACACGCGGAAAAGGCGAGGCGATGGTGGTGCGGCGGCTGGGCGGCGCGGGGCGCGCGCTGCTCACGCTCCCCAACATCCGGAGGCGGGCGTCCAACTCCTGGGCCGCCGTCTGCGACACCTTCTTCTCCACTAAGCAAGTGTTCGAGAACCACCGCATCGTCTTCACCGTCGGCACCTCCATCGCCTCCGTCCTCACGGCTTGGGCAGGCTATTCACTTCGCCACGTGCAACAATCAAGGATTGAACAGAGGCTTGAGTCAATTGAATCATCTCTGAAGGGTAACCACAAAGTTGAACATGAAGAGATAAAAAAGATCGTCACTTCCAGCAA…
>Zm00001d026591
CTCCAGCCTCCTGTCCTGCTCCCTTCCTCCCCTGCCTGCCTGCCGCGCACCACTCCACTCGAGTGACTCGAGTCGTCCTCCTCCCACCACCTCCCGTCCGTTGCGTTGCTCCTGCCCGCGCCTCCTCCATCCACCACACCAGTCCGTCGTTAAAGCTGCGGCATCGGCAGCACACGCCGACGGGTACAAGGAGCACTCATTGCCTCCCCATCTCGTGTAGGCTCTCCCCCTCCTCCGCGCTCCGTCCGTCTCTCATCACCGTTCCGCCGCCGCCCCACCTCTCCCTCCTCTCGCCGCCGCCTCCGAACCCGCCACGGCGCGGCGGAGATCCAACCGGACGGATCTGGATCGACCTACTCCGACACCGCTTTCCGAAGATAGATAGATAGATAACAAGGT…
>Zm00001d026665
ATGGAGGACGCACGCGTGCTGGCGGTTGTCTTCGTCGACGGCGAGCAGAGCGTGGACTTGGGCACGGTGACCGTGCAGCCGTCGTTTGGCGGCGTGAAGCGGCTTCAGGCCGTCGTGGCAGACCGCGTGGGCGCCGCGCCGCACCAGATCTCGGCGTCCCTGGCGCGGCCCCGCCGCGCCCGCCATGTGCCCCTCGACGACGCCACCGACCTCGCCGCCGCCGTCGCGCGGGAGGGTTCCGGGTGCTACGTCATCGCTGGGTTCCGCCGCTCCCGCCGGGGCGGCCGGTCCCGCCGCGACAGGAAGGGAGTCAACGGCGCGGCCGTGGAGAAGACCATCCTGAAGCGCCTCCCGCCCACGGATCTGGCGTCTCTGGTCAGCCCTCTCCCTCTCCCTCCC…
>Zm00001d026669
ACGCCCACCCCACCCGACCCGGGCACACAACACCAATTCACCAAACTTCTCAAGACTGTCACTGTCCACTCCACCACCTCACTTGCGATGCGAACAAGAGCAAAGCCCTGAAATCCTTCTCCCCCTGCACGCACCTGCAGACCTGCTCTCTCGCGCGCATCTCCCGTGCCCCTCACTGTTTAGTGGCGACGACTGGGCGACAGTCGCCGCCGCCGCCCGCTAGGGGCCGTGCCCCTGGTCTCCATCTTCGGGCGCTTCGCCCACCAGATATGAGCAGCTGGCAATTCGATTTTGAGGCCATTATTTGATAACCCGGGACAAGTGCACTGTTACCTGACCATTTTAGCTTGTTCAGATGGCTACACAGTTGCCATGCTTCACACAGCTCAGTCCACCGTC…
>Zm00001d026677
TCTGCCAAAAGATCCTCTCGGATGCCCCCGCCCCCGCCCACCCATTTCGCCAGTCGCCATCGAGCTCTCGCTTCCGCCGCCCGCTGCCGCTCTATCACCCCGGTGCTGAGCCCTAGGATGTGACTGGCGGACGTCTCTATGGCCGAGCCGTAGGTGGAGGCGGCACCTCGGCGCCGTGGGAGATGGAGGACGATGACACCGAGGGTGTAGGCGAGAGCACCTGTCCCCCCGCCGCCGACCGAGGAGGCTCCTCCTCGGCCGGCGGCGGCGGCGGCGACTCGCACAGTTACACTGACATAGAGAAGGAGGTCTTCGACCGTCTCATGGAGAAGAGAATCCCGGAGGTCGTCGCGGACCCGGTGGCCTTCCGCGAAGAGCTCCGCCGCCACTTCGAGCGCC…
>Zm00001d026685
CTCTTTTTTTTTTATAGTACAACACAATCCACCCGCGTCGGCACGAGCACCCACAGCAGTTGGCGCGCACCAAAACCCTACCCTCCCTCTGCTCTCAGCCGCCAACGCCATGGGCTCCACCGCCGCTGCCTCCGTGCTCCCGGTGTCCGCCGGCTCCGGCGAGAACCTCGTCCTCATCCTCGACTACGGCTCGCAGTACACGCACCTCATCACCCGCCGCGTGCGCCAGCTCGGCGTCCTCTCCCTCTGCGTGTCCGGCACGGCGCCGCTCGCCTCCCTGGAGGGCCTCCGCCCACGCGCCGTCATCCTCTCCGGCGGGCCCCACTCAGTCCACGCCCCCGGGGCGCCCGCCTTCCCCGAGGGATTCCTGGGCTTCGCGGCTGCCGCGGGCGCGCACGT…
>Zm00001d026704
GCTTTGGTCGTCCTCCTCGATTAACGATTCTGGTGGGGAGGGAAAGGGAACGGGAGCGGGAGGGGAATCCAATTGCGATGGCCTCCGACTCGGGCGATTTCGGTGGGGAGAACAAGTCGTTGGAAACGGCGAGGCGGCTGCTGGAGGAGACCTTCACGAGTGAGGCAGAGGCGGAGGCGCTACCGAGCTTGCCCTCGGGGTTCTACGACGCCTTCGTCCTGAGGGGAATCCGCGTCGTCCAGGCCCTCCAGCCCGGCACACTCCTCTGCCACTTCAACGTGCCCTCCAGACTACTCAACTCGGGCGGCTTCCTGCACGGCGGCGCAACCGCCTCCCTCGTGGATCTGGTTGCCTCCGCCGCCTTCGCCACTGCCGGGCTACGCACCAGGGGCTCACCCC…
>Novel00379
GTGACAGATTTTAAAGATACTCATTGTAGAATACAGTTCTTTTTAGATATTTCTCGTGCATAGAAAACCGGCTCTACTTCCTTAACAACTCAGCTGCTAGCTTTTACTAACAGGATCTTTTTTTGTTTCTTGCGCACATTGAGCCCACGGGCCCAACCAACAGAGAGGGAGAGAGAGGAGTTGTGAAAGCCCAGCAGGCAAAGAACGGAATGACGAAATCCACAGCCCAGTTATTAGCATAGCAAGAAGTTGTGTGGTGGGCATCAGCGTGTCGTCACCCGGTCGTCCTCGCTCACTCTCCAACGACAATTCCATTCCATGGCATGTCGAAGTTGAAATCCCACCACTGCACGCACGCCTGTCTCCTCCCTCCGCTTGTCTGGGTGGCAAGTCTTTGTT…
>Novel00390
CGGCCTTATGGCTTCTCCAATAGGGAAGAATGTGCGCCTTCAAAGGAAGGTGAACTTAAGAGTAAAAGCAGCTAATGAGTTATAGTTTAACAAGGATGGCTCAGCTATCAAGAAGCTCCAGGTCAATCCCTGTTTTGTTCCCATGCTTGAAATTGATGGTCTTCATTTTGTTGGTTGTGACAAAAGTCAAAACCGGATGGAGGTGTTTAGTTGTGGAGCAGATTGCGGGTTTTGAATTTC
>Novel00474
TTTGAACTTTACTCATCCTCATGAAACTGTGATGCTACCTGTAGGAGCAGTTTGTTAAAGGAGGGAATGACTTTTAGACCCTAATAACTTGTCTACACTTAAGGTGTATGAGGAGGATAACGAGATGTGCAATGCGCGCAACAGTAAGCAGACTACCATCACTTGGTTGCTCTTCAAGTGTGGAAGTGTGTCTATGGACTGTATGGTTCTTTGGTTTTTGTTGTCCGCTGAGGTGCAAAGTAGGAAGAAAATGCGGCCCTGACCCTGCAAGTGGGGAATGTATC
>Novel00495
ATAGCTGTCTCACATTGAAATGTGTCCGTTTCTATTCAGCTTGAGATGATGTCTGATGCTATTGATGAAACACTTGACAAAGATGAGGCGAAGGAGGAAACAGAAGAGCTTACAAACCAGGGACTTCTGCATCATCAGGCAGGAGTGGACTGTCGTCCGCATCCAGTCCGCCTTCCATGCATTCCTGGTAGGCTTACCTGCCGCCTTTGTTTTTTTGTCCTCTCACTGGTTCTTGTCAGTGGATGTGTGAATGCTTGGAGGGCGTTGAGGGCACTGCGGGGCATTGTGCGGCTACAGGCGCTGGTGCGCGGCTGCCGCGTGCGCAAGCAGCTCGCAATCATGCAAAAGTGCATGAACGCGCTCCTCAAGGTCCAGGAGCACGGACGAGACCGTTGCTTC…
>Novel00504
CTTAGGCTTTCCAGAAAGTCTTAGTTCACTATTTTTGGATGAATATTTTGTGAGTTGTGAACAAAACAATTGACTACTGTGTGCTGTCCAGAAAATCTGCAATTGAGCACTTGATTTTGTTCTTGTTTGGCTAAGTAGGAATAATTAGTTTTTGATTCTTGAGTGATGAAGACTTGTGGCATTTGAAATGTTTCTCCAAATGTCTTGTTGCATATGGTTGAGTTTTTTCTTTCTTAATGTGTGCTCTAAACCTATTAGTTTGGGAAGTGATGTGCCTGTACTTAGAGGGATCATCGTGATTTTGTGCTCGTGGTAGTATACAACAAAAACATGTGCTTTTATCTTAACGTCTGTTTGGTATATATTGTGTTTTTTTGTGAGAAATATATTGCAAAATCT…
>Novel00549
AGATGATGCAGGTGTTCGTGAAGACGCTGGTGGGGAAGACGATCACGCTGGAGGTGGAGTGCAGCGACACCGTCGAGAACGTGAAGGCCATGATCCAGGGCAAGGAAGGCATCCCGCCGGAGGAGCAGCGCCTCGTCTTCGCGGGCAAGCAGCTGGACGACGACGGCCGCACCCTGGCCGACTACGGCGTCCAGAAGGAGTCGACGCTGCACCTGGAGCTGCGCCTCCGCGGCGGCAGCAGGGGCGGCTACCCCATGGGGATCCCGCCCAGCCTCCGCGAGCTCGCGCAGAAGTACAACGAGAACAAGATGGTCTGCCGCAAGTGCTATGCGCGGCTTCCGCCCAGGGCAACCAACTGCCGCAAGAAAAAGTGTGGGCACAGTAACGAGCTGAGGTCGA…
>Novel00556
ACTTTACAAGCAGCAGCAAAGAGATGTCGGACGGCACGGCCACCTGCGTCGACATCATCCTCGCCATCATCCTGCCGCCGCTCGGGGTCTTCTTCAAGTTCGGCTGCGGGGCTGAGTTCTGGATCTGCCTCATCCTCACCTTCTTCGGCTACCTCCCAGGCATCATCTACGCTGTCTGGGTCATCACCATGTTTTTTTTTTAGATAATGGAACAGAAATAAGGTCCCAGCCTCTACACCATCCAAGACAGCGTACACAGCGTATCGATACATCCAACAAGCGCTTAGGCTCACAAACAGACTCAAAAAACCAAGTTTACCCAAGACAGCTAGACGACTAGGCCGCAATTCTATTTGAGAACTTCCACCCAAACTTAGCGAACACCTCCATAACGACCGA…
>Novel00563
CTCCTCTCCATCCCATCTCCAACGTCGCCCCAACCCCCATCACCGACAGGGAACCCACCTCTCACGTCGACACCGCCAGAGGAGGAGATGGTGGAGATACGGGCGTTGCGATCCGAGGCAGCACGCTAGAGCGACGAGAGCGTGGCGACGTGGAGATCATGGGAGTCCTGCGCAGCGTCGCGGCGAGGCGCCCGTCGGGGAGGCAGCGGGCACGGAGAGAGCGGAGAGTGACGGCGACAACGGGTCCCGCCTGTCGCGCGAACCAGGGAAATATCTACATCTCGTCTGCGCCGCCGCTGGGATTTATTAGGGTTCTACTTCTAGCCCAGGCCAACTCCACACCAATCCAATCCTGGGGCGGGCGACTGCCTCCTTCCCTCGATTTGACGTGCGCTTCCT…
>Zm00001d001800
ATGCTGAGGAACATGGCGGATTCAGCAGTGCAGCCGTCTCTGGTAATAGTTTACTTTGGTGGAAACGACTCAATTGATGCTCATTGTTCCGGTCTCGGGCCTCATGTGCCGCTAGATGAGTACATAGGGAACATGAGAAAGATTGCAGAACACCTAAAGAGCCTCTCCGAGAAGACACGGGTCCTTTTCCTGAGCTGCCCACCTCTGAACGAGGAGATGCTTCGAAACTCAACCAGCAGTACTATACTGAGTGAGATCGTCCGGACCAACGAAACCTGCCGTCTGTACTCTGACGTGTGCGTAGCTCTGTGCAAGGAGATGCACCTGAAGGTGGTTGATCTCTGGCATGCCATGCAGAAGAGGGAGGACTGGAAGACTGCGTGCTTCACGGATGGGCTG…
>Zm00001d001820
GTCGAACACAGAGTCACTTCGCCACGAACAAAAGCGCATCGATCTCGCTGTCGTCACTCCTCGTCACCCAGCCACGAACAGAGGCACCACCCAGCATGGCCCTGCAGGCGGCGCTCCTCCCATCCACCCTCTCATCCGTCCCCAAGAAGTGCAGCATCGCCGTCGCGGCGAAGGACACGGCATTCCTTAGCGTATCCCAGAAGAAGGTGCAGGCGGCGTCGCTGTCGGTGAGAACGCGGGTGGCGACGACGGCGCCTGTGGCCACGCCGGGGTCCAGCACGGCGGCCAAGGATGGGAAGAAGACCGTGCGGCAGGGCGTGGTGGTGATCACGGGCGCGTCGTCGGGGTTGGGCCTGGCGGCGGCCAAGGCGCTGGCGGAGACCGGCAAGTGGCACGTGG…
>Zm00001d001838
TCTTCAAGGGCACAGCCGCGGCCACCACCAACACCACCTGGCCCCGTCCTTCCTTTCTTGTGTTGCCGCTAGGCCAGCCATACACACACGACGTCGCTGCTCCGCATGGCCAACGCCAATGGCTCGTCCACCGGTGCAGGCCATAGCGACCTCGTCAGGGCCATTTCGCACGAGCAGCACCAGGCGTTCATGGCCTCCGTGCCCCGGGCCGCACCGGGCGGGGTGAATGTGCACCACCAGCAGCACTTCCACCAATACCCCGCCGGCTTGATCCCAGCGCCGGTGGCACTGCCGGTTCACGCACCGGTGTCGTCACAGACGTCTCCGTACTCCGCCCAGATCGCGGTGCCGCCGCCGCCGCCACCACTCATCGCATCTCCAGACCACCGCCTGCACTCC…
>Zm00001d001960
ATACAGCAGCAGAAGCAGCATCACGATCCCGGCCCGGCGGCGCGTACGTCGACGAGGAGGAGGAGGACGTACGTACGCAGAGCAGCTGCTGGCACCATGGCTCCCGTGAGCATCAGCGCTGTTCCGTTCCTCCCGACGGCGGCGGAGGGGGAGACGAAGCTGCGCGCGTCGTTCGTGCGCGAGGAGGACGAGCGCCCCAAGGTGCCGCACGACCGCTTCAGCGACGAGGTGCCGGTGGTGTCGCTCGAGGGCATCGACGGCGCGCGGCGGGCCGAGATCCGCGCGCGCGTGGCCGCGGCCTGCGAGGACTGGGGCATCTTCCAGGTGGTGGACCACGGCGTGGACGCCGCGCTCGTGGCCGACATGGCGCGCCTCGCGCGCGACTTCTTCGCGCTCCCG…
>Zm00001d002055
ATGGCGATGTTCTTCCTGGTCGCGCTCTCCGCCTCCCACACGGCGTCCTCCCTCCGCCCCGGCGCCGGCCTCGGCACGTGCCGCGCCAGCGGATACCTCCCGGGCCGCTCCGGCAACTGCGAGAAGAGCAACGACCCGGACTGCTGCGAGGACGGCAAGATGTACCCGCAGTACCGCTGCTCGCCGCCGGTGACGGCGAGCACCAAGGCCGTGCTGACGCTGAACAGCTTCGAGAAGGGCAAGGACGGCGGCGGCCCCTCGGAGTGCGACAACGCGTACCACAGCGACTCGGAGAAGGTGGTGGCGCTCTCCACGGGGTGGTTCAGCAACATGGCGCGCTGCGGGCACCGAATCAAGATCAGCGCCAACGGCAACTCCGTGTACGCCAAGGTGGTGGAC…
>Zm00001d002256
GGCGGCAGCACCCCAACGCCGTCCACACATTTCCCAGCGAAAAATCCTTTCCCACCAAAAAATAAAAATGGAGCCATGGAGGCTGCAGTCACACACAGTCACTCACACATGTGCGCGGGCACGGGAAAAGCACGAGTCTACTTTTCCCTTTCGATATGCGGCCGAGGAGAGCCTCTCTGGCGAATGGCGAGTGGCGAGCGATTCGTCTAGACTCTAGACAAGCCCGGCTGCGCATTTCGATGCAAATACGTGGAGGATGGAGTAAAATACTAAGTAAGTGAGAGAGAGGATAGAGGAAGGAGAGGGTCTTTTCTTTTCTTGACCCAAGGTCCAAGGAGGGGATCAGGGGGGAGTGAGCGAGGGGGAGGTTTTGCCGCCGGCAATGGAGACGAATCTCCG…
>Zm00001d002263
ATGGAAGATGCTGTCGGAACCTTGTGCAAACACAGGTTTCAGGTGAAAAGCAACAGGAGTTCTGAGGCTTACACATTTAACCATGATAGTATGGCTCGCCGTGCATTGAAAAATACATGCCTTGCATACCTTGCGTCATTGAATGAGCCAGATTTCGTTGAGCTTGCACTGCATGAGTACAAGTCTGCGACTAACATGACAGAGCAGTTTGCTGCATTAGCAGCATTATCCCAAAATCCAGGCCAAGTTCGTGATGATGCCCTCTTGGATTTCTATAACAAGTGGCAGCATGAATACTTGGTTGTAAGCAAGTTGTTTGCTCTTCAAGCTACTTCAGAGATTCCTGGAAATGTTGCAAATGTTCAGAAGCTGCTGTCTCACCCTGCTTTCGACCTGAGG…
>Zm00001d002342
AGTCACACCACCTATATATCCTCCTCCTCCTCCATGACTACTCTCTGCTGTGCTGCGCAGGTGCAAGTGCGACCCAACCCAGCCGGGAAAGGAAAGAGGAAAGGGAGGGAGGGAGGGGACCGTTGCAGTTGCAGCCATTGATGCGCCAGCAGTAGCGCCAGCAGAGCGGAGCGGAGCGGCACCGGCCTGCAGCTCAGCGCCAGGCTCAAGAGACCGATAGGGCAAGGGGGTTAAGCATGGAGCCTGCGGCGGGACGGAGAGCGAGATGTCTGCTGTTGCCTCTACTTGTGGGGGCTCTCGCCCTCGCATTGGCCGGCGCTGCGACTGCGACCGCGTGGCCTCACCCTCACGGCGGCGCCGCCGGTCTTGGACATGGCGCTGGCGCCGCAGCCGCGGGTG…
>Zm00001d002358
CATAGCATAACCCGGGAGCTCGCTCTCGCTCCCCCCTCCCCCTCCCTCCCCTTTTGACCCTCCCTCACCAGCTGCAAAACCGCGGGCCGCATCCCGCCCGCGCCGCCCACCGGCGGCCACAGCCGCCTACATAAACCACTAATCGACCACTCGCCGAACCAAACCACCCACCCACCCAAACCCAATGGCGTCCAACCTCCTCTCCGCCCCGTCCCGAACCCTAGCTCCGTCGCCGGCGCCGGCCCCCGCGGGCCTCCGCGGGCGTGTGCCGGTGCAGGCGCACCTCCCGCGCGGCGGCCTCGGCCTCGCCCCCCGCCGCAGCAGCCGCGCGCTCCGCGTGCGCGCGTCGGTGGCGATCGAGAAGGAGACGCCGGAGAGCGAGCCGCCCCCGACGTTCCT…
>Zm00001d002381
AGCTCCTGGAGGTCATGTGAAAACAAAAGGCACAATTTACCTGTCCAATATAAGGATGGTGTTTGTTGCCAGCAAGCCTGTTGGCAACTTCTTTGCTTTTGATATGCCACTGTTGTTTGTGCATGGTGAGAAGTTCAATCAGCCCATATTTCACTGCAACAACATCTCTGGATTCGTTGAACCAGTCGTTCCAGACAATCAGAACAGGGCCCTGTACTCAACTCACACCTTCAAGATCTTGTTCAAGGAAGGCGGCTGTGGTACTTTCGTTCCTCTCTTCCTTAACCTGACTGCATCTGTGCGGCGCTACAATGAGTTTGAAGCCCAGTCTGCTGCTAACATGGCACCGCGTGTGGATCCTCTGCAAGCCGCGCAGACTCCTGTCGATGATATGATGCG…
>Zm00001d002458
CAGTGCATTGGAGGAGAAATCTCCAGAATAAGCTATCAAAATGTATGATGAGGCTTGTTCAGTTCTAGAAGAAGATGGGAAGGAACATATGGCTTTTGACTTGTACCGTGTCGCAGCAGCTTTGTATATCAAGATGGAAAAATATTCAGATGTTGCTGCTTTGTTTTTAAGACTTGGTTCAGCTGCTGATAAGTGCAATGCCATCAATAGCCAATGCAAGGCCTATCTGAGTGCGATCATCATCTATCTTTACGCACATGATTTTCAGCAAGCTCAAAAATGCTACAATGACTGCTCAGAGGTTCAAGCCTTCCTCAATAGCGGACAGAATCGATGCACAACAAAGCTATTGTCTGCTTATGAGGAAGGTGATGCTGAAGAAATCAAACGCATTGCTCA…
>Zm00001d002483
AGCCACTTGACTTCGCTTAAACCCTGATCCTCTTCCTCCCTCTCCTCCGGTCCTCCCGCGCCGCCACCCCCATCTCCCACCGCAAAACCTTAGGTCCGACGAGCCCCCGCCGTTGCCGTGGGCGCCAGAAGCAGCCATGGCTTCGAGTTCGACGTGTGTTCTTAAGAAGAACTACCGCTGCGACCGCTCCCTGCAGCAGTTTTACACTGGTGGGCCCTTTGCGGTCGGGCTTGCCCCCGGCGGCGATGGCGAGGGCGGCGCCGAGGCTGAGGCCTTCCTCGCATGCGCCTGCGGTGGAGAGGTGCGCGTGGTGTCCTCCGCGGACGCCTCTGCCATAGGGGAGCCCGTCGACGGCGACTCGGAGGCCATCACCGCGCTGGCGCTGTCCCCCGACTCACG…
>Zm00001d002490
CCCAGTTCCCAGCCCGAACCACCGGCGACGCACGCTCCGCTTCGCTATGGCGCTCTCGCTCGCGCGCAGCCCCAACCCCGCCGCGGCGCTCCCCGCCCCGCGTGTTCCCCACTTTGCCCTTCCTCTCCTCACGCTCCGCTGCCCTCGCCGCCAGAACCAGGCACGCCTCCGCGTCGCAGCATCCTCGCCCCCGGAGGCGCAGGCTGCCCCCGTGGCGGAGGATGAGCAGGGGGAGAAGCGGCGGAAGCTATACGTTGCCAACCTGCCCTGGTCGTTCCCGGCGCCGGAGATCGAGAAGCTCTTCGCGCAGCACGGCACTGTCAAGGACGTCGAGGTCATCAAGGGGAAGGATGGAAGAAACAGGGGGTTCGCGTTCGTGACGATGTCGACAGCGGAGGA…
>Zm00001d002678
AGGTATCGTGTCGGTGTGCAGTGTGTTGTCATCTCCATCTCCAGCTCCAGCGCCGCCTTGCTCTGTGTGCTTCCGCCCGCTCTGTGTTGCTATTGCTAAACTAGTGTGTTCTGTCGCTATGGGCTCCCTGGCCACCGCGGACGGGCCGTTGCCGCCGCTCAAGTACCCTCAGGCTCGCCGGGACGAAGACATCGTCGACGACTACCACGGCGTCCTCGTGCCGGACCCTTACAGATGGATGGAGCAGGTGGATTCGAAGGAGGTGAAGGAGTTCGTGGACGCGCAGGCGGCCGTGACCAGCGCCGTGCTGTCCAGCTGCGACCACCGCGGGCGCCTGCGCGGGCAGCTCACCGCGCTCTTCGACCACCCGCGCTTCCGCGCGCCCTTCAAGCGCCGGGG…
>Zm00001d002753
ATGCGCGCCGCCCGTCGTCTTCGCTTCTACGGCACTGAACCTGGATGGATAATGGATTGTGCGCGGGCGAGCCACATCAGTCCTACGCTCCAGCTCGCCGCGCTGCTCCATGCGCGGGGCCTCGCCGTGACGGTCCTCCACACCGGCTTGAACGCCCCCGACGCCTCGCGCCACCCGGAGCTCACCTTCGTCCTCATCCACGAGTCGTCGTTCCCCGACGAGGACGTCGCGTGCGCGGTGGTCGACGGGCAGTGCTACTCGGCGCTGCGCGCGGCACACCGGCTGGGCGTCCCGGCGCTCCCGCTGCGGACAGACAGCGCCGCCACGTTCCGCAGCATGCTCGACGGTAGCGACACGGACGCGCTGTGCGGCTTCGTCGGCCACGTCGCCGACGCCGTG…
>Zm00001d002833
ATGCGCCTCCTCTGCTGCTTGGCCGCTCTCGTCGTCCTCGCTCTCCAACACCAATGCCACGGCCTACTCCTCCCGCTCACCAACACGATGCTCTCCTCGCTCCGCGGAACCAATGGCACCACCACGCCTGTGCATCACCTCCTCCGCGCGTCGTCCCTCCGCTCGGCCGCGCGCCACGGCCGCCACCGCGCGCGCAGGAGCCCGCCATCGCCTCCCAGTCCCGGACGCCACCGCCAGCTCTCGCTCCCACTCTCCCCAGGCAGCGACTACACGCTCCCAGACGACGCCGCCGCCGCCGCCGAGACGGACGGCTTCGTGTACACGCCGCTGCTCCACAACCCGAAGCACCCGTACTTCTACTCGGTGGCGCTGGAGGCTGTCTCGGTAGGCGCAGCAAGG…
>Zm00001d002837
AGCAGCTTCTCGTTTCATCAGCCAGCCACCACCAACCAACCACAGCGAAACACCTCTTTCTCGCTCTCTCATAAACGACGAGGAGGCCGTACGGCACTCCGCAAGCTTCTCAGTTCACTCTCTGGTCTCCAGTCTCCACCGCTCCAGCAGCCTGAGCTAGTGAGCTGAGCCCCGAGCTGCTATACCGTACACCAAGTGCACAAGCGGATCGGATCGGATCGGAGCGAGATGGCCGCGGCCGGGCTGGGCGTGAAGGCGACGCCGTTCACGTACGCGGCGCACGCGCTGGCCGCGGTGGCGGCGGCGCTGGTGCTGGTGTGGTGCGTCCACTTCCGCGGCGGCCTCGCGCTCGAGGCACAGAACAAGAACCTCATCTTCAACGTTCATCCTGTTCTTATG…
>Zm00001d002937
GCCAGCGCTCCCGCTCCTTGCTCGCCTCCACCCGCGGCCACCACCGCCCTGCGGCCCCCGCCGCTTGCTAGCCTCCACCGCGCCGCGAGTCACGCCGTTCATGCACCGGCTGGTCCTGGAGCACGGGAGGACGAGCATGTCCTGGTTCGGCCCCAGCCCCAAGGTGACCATCGTCGACCCGGACCTGGCCAAGGACGTGCTGTCCAACAAGTTCGGCCACTTCGAGAAGCTCAAGGTCCCGGCGCTGTCCAAGATGCTGGGCTCCGGCGTGGCCAGCCACGAGGGCGAGAAGTGGGTCAAGCACCGGAGGATCCTCAACCATGCGTTCCATCTTGAGAAGCTCAAGCGCATGCTGCCGGCGTTTTCTACGTGCTGCGAGGAGCTGGTGAGCAGGTGGGC…
>Zm00001d002970
CAATCCCACCCAGAGCCAGAGACCACGGATCGGAGAAGAAAAGGAATGTAAGCCTCAGCACACACGTATAGACGACGACGTAGCCTTCGTTCACAGAAGCTGATCGCGCGAGACCCCGTCCGTCGTCCCGCGCGCGCGCATGGGGGCCGAGGCGGTGGCATACCCGGCCGTGCTCCTCGTGCCGTTCCCGGCACAAGGCCACATCACGCCCATGCTGCAGCTGGCGGGCGTGCTCGCCGCGCACGGCGTGGCGCCCACCGTCGCCTTGCCGGACTTCATCCACCGACGCATCGTCGCTGCCTGCGGTGGCGGCGGCGTCGTCGGCGTCACGCTGGCGTCCATCCCCAGCGGCATCGATATCGTCCAGCAGGACGCCGCGGCTGGCGACGACGACGACAC…
>Zm00001d003086
ACGCAAACACGCACGCACACCGTACCCCTCAGCTCGCGCCACCGGCCACCGCACACAGAACGCGTGCTCCGTCCGTCCTCCCTCTGCCTCGCGCGCGCAGGGTTAGCGTGAGCTGATCGAGCAACGAGAGCTAGCTAGCTAGAGGACACGACACGATGGCCTTGCAGGTCACCGGCGGCGTGGGCTGCTGCTGCCCTCCGGGCAGTGCCCGGCGGTTGCCGCAAGCGGCGGCGCTGTGTCGCCCGCCCCGCGCGGTAGTGTCCGGCGCAACCAGGGTGGTGGAGGAGGACGAGGGCAAGGTGAGGCTGGGCGGCTCAGGCGTCGCGGTCACCAAGCTCGGCATCGGCGCGTGGTCCTGGGGCGACACCACCTACTGGAACGACTCCGAGTGGGATGACA…
>Zm00001d003174
ACGGTGTCCCCCTCCCTACCCGCTGTCTGCGGCTGGCCACCCTCATAGCCCCCGAGCTCTGTGTGCGACGATGGACTACTCGGGCACCAAGGAGTCGCCTCCTGCCGGGGCTTGGTGGTCGAGGGAGACGGTGGCCGTGGTGACCGGCGCGAACCGCGGCATCGGCCACGCGCTCGCCGCCCGCCTGGCCGAGCACGGCCTCACCGTGGTGCTCACCGCGCGGGACGGCGAGCGCGGGGAGGCCGCCGCGGCGCCGCTCCTCGCGCGCGGGCTCGCCGTCGTCTTCCGCAGGCTCGACGTCTCCGACCCCGCCTCCGTCGCCGAGTTCGCCGCGTGGATCCGCGACGCCCTCGGCGGCCTCGACATCCTGGTGAACAACGCAGCCGTGTCGTTTAACGA…
>Zm00001d003212
GCGAAACCATCGGCGGATTACATAAGCCGACAGCCACCGGTCGTTGCGTCTTGCTCATCAGAACGCTAGCTAGGACTAGGAGAAGCTTAACCTCTGCAACCACCGATAAGAGTTACTACTATTTACATAGGAGCGGCAGCTGCCACCGCGTGCGCCGGCGATGGGGTGGTGGGAGAACGCCAAGAGCGTGTTCGGCGACGCCGGGAACGTCGGCTGCTTCCCGAGGATCGGGAGGAAGCAGTCCAAGAACTCGTACGCTTTCCCGGCGGATCCTGGGAGCGAAAAACGGAGAGGGTCAGGCGGCCCCGCCCCCGCCCCGGAGGAGGTGATCACGGTGGAGGTGCCGGAGGTGCCCCTGCGCGAGCTGAACGGGATCACGGCGTCCTTCTCAGGCGAGAA…
>Zm00001d003272
ATGGCCAACGGCACCGGCGACGGAGACGGGAAGGGGAACGCCAACAGCAGCAAGCTGGCCACCGCGGTGTCGTCGTCCTCCTCGACCGTCTCCACCACGTCGTCCGCCGCGACGGCGGCCGCCGTGTCGGAGGCGTCGTCCTCGACGACGTCGCTCCCTTCGCTCTCCTCAGCGACGGGCGGCAGCGTCACCGCGTCCTTGGTCCACGTCACCACGCTCCTCCCTCCGTCCGCGCCGTCCGCTGCCGCCGCCGTCGCGGCGGCGGGGGACTCCCCCCACGGCCTCGTCGTGGCCCGGCCGGCGTGCGTGGCGTTCCACGACCTGTCGACGCTGGAGGCGACGTCCACCTCCGACGCCGCGGACGGCGCCGCGGCCGCGGGCTCGGTCAAGTGCGTGACG…
>Zm00001d003356
GCTCATTCTTCACAACTGCGGCTTAGTACACGTAGGCCGCGCGCGCTAGCTCTTGGTCTAGCTTTAGGTGCACCAGCAGCGCGCGAACGGCGGATCGATCAGCTTCGTCTTTCAATTCTTCTCCACATCATCATTTGCGCCACGTACGTAAATCGGCTGCTGCGGGAGAGACGACCGGCCGCCGGCGACGCCGCCATGACCAAGCAAAAGGCAGTGATCAGGCTTGGCGTAACGAACGACCAGAACCGGTCTAAGGCCATGCAGCTGGCGTCCCGATTTCACGGAGTGACCTTGGTGTCGATCACCGGCGCAGGCAAGGACCAGCTGGAGGTGGTAGGAGAAGACATCGACATCCCCTGCCTCGTCAATTCGCTGCGCAAGAAGGTCTGCCGCTCCGCC…
>Zm00001d003411
AAGATGAAAAGGGCAAGGATTCCCGGCACAAGTTTGTTGTTCCTCTTATCCGCGGAGGAAGAACGTTGGCTCGACACCATGCTCCCAATGGCCGTCCACCCCACGAGCACGCCGTCCCTGTCGCCGCGCGCCCGCGTCTCCCCGCCCAGGCCTTCCACCTCTCTGGCCGCCACCTCGTCCTCGCCCTGCTCTCGCATCGTCAGTTTCAAGAGCAGGAGGCTGCCACTTCGCTCTGTCCGCAGCGTCGTCGCCGCTGCCGCTGCCGCCGCTGCAGAGGAAGAAGAGGTACAACTAGGTGCAGGTGTGGATGCGGTCGACTAGGAGGAGGCGGAGAATAAGGTGGTGGTACCTGAGAGGCAGGACCCGATGCTGGTGCTCAAGTTCATCTGGATGGAGAAG…
>Zm00001d003522
GTACACAAACCAAGCTCTTGCAAGGAGAAAAAAAAAGGAGGGGCAAGGAACGCGCTGGCTGAGAGACATGGTTCTGACGCACGTTCACGACCTTGACGAGGCATCCGCCGCATCGGCCGTCGTCTTCGCCTCGAGATACGTGCAGGACCCGCTTCCAAGGTATGAGCTGGGAGAGAAGTCCGTCTCCAAGGACGCGGCGTACCAGATCATCCACGACGAGCTGCTGCTGGACAGCAGCCCGCGGCTGAACCTGGCGTCGTTCGTGACCACGTGGATGGAGCCCGAGTGCGACAAGCTCATCCTCGAGGGCATCAACAAGAACTACGCCGACATGGACGAGTACCCGGTCACCACCGAGCTCCAGAACCGGTGCGTGAACATCATCGCGCGGCTATTCCA…
>Zm00001d003524
ACCGGCACGGGCTCATCACCGCTCAAGCAGTCGCCGCACCCCCTCTCTGTCTCTCGCATCTAGTCTAGACGTTGTACTGCAGCGGCAGCGCACCACATCTGACCCTACCAACATGGCATCCGCGGGGACGACGGCGGTGGTGCCCGAGGTGGCCCTGCGGTCGGGCAACGCGAGGACGGCGATGCCGATGGTCGGCATGGGCACGGCGTCGTTCCCTCTGGTGCACGAGGCCGTCAAGGACGGCGTGCTCTCCGCCATCGAGGTGGGGTTCCGCCACTTCGACACGGCCTCCATGTACGGCACCGAGAAGCCGCTGGGCGACGCCGTGGCCGAGGCGCTCCGGCGCGGGACCCTGCGGTCCCGGGAGGATCTGTTCGTGACGTCCAAGCTGTGGTGCTC…
>Zm00001d003618
ATGGTGGCTCTGAAGTCATCTGTTAACCGATGGATTTGGTCGTCGAAAGCGTCGTTCATGGGCGCTTACCCGTCAGGCCATCAAGGTTTCCTCTTCTGCCCGGCTCGTTGCCCTCCACTACCGTGGCACTGAGTGCTGCCTTTTCCGGACGTCCATGCCCACCCATTGTTCGTCGGAATGCCCCAGCGGTGGTGCCATTTGCCAAGAAGAAGAGGAATGAATATATCGAAGATCCGCCAGATGAGGAGGTCGCAGATGATTTCACCGACGAGATGGAGGAGGACTTCGACGACGCCAAAGAAGACGAAGGCGATGTAATGGATGATGACGAAGAGTATGAGGACGACTATGACTTTGAAGATGATTTTGAGAGTGATGATGAACAGGATCTTTATGCTG…
>Zm00001d003690
GTGTTCAGATATGGAGCAGTTTGTGCACTGCTCCACATCACATCTACAACTGTCTAGAAGAAAAAAAAGTGCTCAACTAATAAGCGGTTCTTCCAAATAGAAAGATAACTGCTTAATTTACTAGACACATGTCGATCCCTGTTTGAACCAGCCCCCAAGTCTTTAGCTTTGTCCACTCCCGCACTGACGGCCGCAAAAGTGCAAAACAGCCACGCTGAGGGAAGAGCAGAGTGGCGGCTAGATCTGGGAAAGATTGAACAACATGAATCTCTAGAGAACATCTTTAGCTCTATTCTTGAAACTACTGCTCAGGCTTATGGTGAAGATGACAACATTCAACCTTCTTCGGGATGTACGGATGCTGGCCAGCTCTGTCATCACCCAGTCCAGGAGCTCGAC…
>Zm00001d003757
ACACGCTCGACGACACTATATAAGAAGCGGCCAGCCCACACAGCTGCGCACCGATCACAAAACCAATCGCGGAGATTCAATCACGTACGTATACACACGGCCACACGGGCACGTAGCTAGCTAGCAGTCGTAGCGTGACGATGAGGGTTCTCTCTGTTGCGGTCGCTCTGGTCGTGGTGGTGGCCGCGGCCTGCCTCGCCGCGCCGCGGGGCGCGGACGGCGCGGGCGAGTGCGGTGCGACGCCGCCGGACACGGTGGCGCTGAGGCTGGCGCCGTGCGCGTCGGCGGCGGAGGACCCCGGCTCCGCGCCGTCCGGCTCCTGCTGCAGCGCGGTGCACGCCATCGGGAAGCAGAGCCCCAGGTGCCTCTGCGCCGTCATGCTGTCCAACACCGCCAGGA…
>Zm00001d003760
ACACAAGTCATCCGAGAAGCAAGCACAAGCACTGCACCGAACGAGCAGCGAGCGTGTTGAGGCAGGCAGTCAGTGGCAGTGGGAGTAGGAGACAAGGCTACCGAGATGAAGGGCCTCTTGTTGCTCGTCATCGCCCTGGTCGCGTCCGCTGCATGCCTCGTGACCGTCCGCGGCGCGGGCGAGTGCGGGGCGACGCCGCCGGACAGGATGGCGCTGAAGCTGGCGCCGTGCGCGTCCGCGGCGCAGAACCCCAGCTCGGCGCCGTCCAACGGCTGCTGCACGGCGGTGCACACCATCGGGAAGCAGAGCCCCCAGTGCCTCTGCGCCGTCATGCTGTCCAAGACGGCCAAGAAGTCCGGGATCAAGCCCGAGGTGGCCATCACCATCCCCAAGCGCTGC…
>Zm00001d003817
ATTCCTTCCCTCCCCACTCCCCAGCCCAGCCCTGCTCACTCCCGCGGGCTAATAATATCTCACGCCGCTCGTCCTCCTCGGCCTCAGCTGCCGCCACTCCCCACACTCGCTTCCCGTGGGCTGCGCGGGTGAAGGAGCGCGCGCGTGCGTACGTACGTGCGGGTGGTTGGACTCGGATCTGCTGCTGGGTGGGGCGCGGGATGGCGTCGTTCGCTGTGTCCGGCGCGAGGCTCGGGGTCGTGCGGCCCGGCGGCTCGGCGCGATCTGGTGGGGAGCGGAGGAGTGCGGTGGACTTGCCGTCGGTGCTCTTCAGGAGGAAGGACGCTTTCTCTCGCACCGTTCTGAGCTGCGCTGGTGCTCCTGGAAAGGTACTGGTGCCTGGAGGTGGCAGTGATGACT…
>Zm00001d003913
TCCACAGGCAAATCCCCTATCTCCAACCTGTGAACGGTGAACCCCGATCGAATGACGCCGACGGCGAACCTCCTCCTCCCGGCTCCCCCATTCGTCCCCATCTCTGATGTGCGCCGCCTCCAGCTCCCCCCGCGCGTCCGCCACCAGCCTCGTCCCTGCTGGAAGGGCGTGGAGTGGGGCTCCATACAGACCCGGATGGTCTCTTCTTTCGTTGGGAGCAGAACACGCCGCAGAAACGTTATATGTGCTTCCCTGTTTGGAGTTGGAGCTCCCGAAGCACTGGTCATTGGAGTAGTCGCCTTGTTGGTATTCGGCCCCAAGGGTCTAGCAGAGGTAGCCAGGAATTTGGGGAAGACTTTGCGTGCTTTCCAACCAACCATTAGAGAGCTACAGGATGTA…
>Zm00001d004109
ATGCTAATGGCTAAATGTAGAACATTGCAAGAGGAAAATGAAGATATTGGGGCGATGGCATCAGAAGGAAAAGATTTTGAATTTTGGTGCATGTCCTTGCAGGCATGTGTTCTTCCTGCCCCCAGGAGATCTTTTTGTGGCAATTATGCCAGAGTCGTGAATCAAATTTTGCAAGGCCTGACCAATATGCATTTGTGGATCAGGTTGCCTCTGGAGAATTCTAAGCCTATGGATGATGATCTTGATAAAATAAAGAATAACAGCCACACGAGTGAAATTATAGACTCATGGGAATTATGGAATTCATTCAGATTGCTATGTGACCATAGTAGCCAACTATGTGTGGTACTTGATATTTTGAGCACTCTGCCATCAATAAACTCATTAGCAAGGTGGTTT…
>Zm00001d004168
ATGAACGCGCTGCAGATCCTGCGGGAGACAGTGCGGGTGCTGCGCGGAGACCCGCACGCGTTCACATCCATCTTCCTGCTGCTCTGCCCGGTGTCCGGTTGCCTCCTCCTGTCCGCGGCCGCACTCTTTTGTGCTCTCGACTCCCCGCCATCAACGCCCGCCATCGAACCCATACGCGATATCAACACCGCCCGTCATGGAAGGTTCCCGAGGATCCCCCACCCTCCTCCCCCACTGCTGTCGCCTTCCCGCTCGCGGGTCGCTCACTCCACTCTGTGTCACCTTCTCCGGCGGACCTCGGCTCTCCGCTACTCCTCCCACGAAGCCCAAGCAAGCCTTGAGTACGCCTGGTGTGGAACTACTATGAATGTCACGACCCCTGGTGGAGTTGGAGGACCG…
>Zm00001d004330
ATGGCCGAAGAAACCACCTTGCTGGCAAATTCGTATGGAAGAAATGAAGGAACCAAGGGCATACATCGTGGAAGAAAGCTGATGGACGCCGGCTTATGGAAGTGGTCATATTGCTCGTCTATCTTACTAGATGACTATTGTGGCTTGTTTGGCTTATGGAACCAAGTCCCCCTATGGGCCTGTTTGGTTGCCTGCATGGCTGAGCCTGGCTCGTATCTAATGAAGCCTGCAACGGTGGCACTGCTCATTTTGAACATGATGTGCATAGTTGCATACTTTGATCATGGGAGTTTTCTTGTAACGATGGCAGAAGAAACCACCTCGCTAGCAAATTCATATGCAAGAAACGAAGGAGGAACCAGCAGCTTTACCAAGGACATACATCCTGGAAGAAAGCTG…
>Zm00001d004366
TGCCAACCCAAAGCCTAAGACAGCAAACCATGGGGTGCACAACCACGAGCGCCACCTCGTCTTCCTCCTCTGCTGCCAGCGGCGGCGGTGCACACGTGCTGCTCCCGCCGTACCCTGGCGCGCAGGGCCACACAAACCCGCTGCTCCAGTTCGGCCGCCGCCTCGCCTACCACGGCTTCCGCCCCACGCTTGTCACCTCCCGGTACGTACTCTCCACCACGCCGCCCCCAGGGGAACCCTTCAGGGTGGCAGCCATCTCCGACGGCTTCGACGGCGGCGGCGCGGCCGCGTGCCCCGACATCGCTGAGTACTATCGCCAGCTCGAGGCCGTGGGTTCGGAGACGCTGGCGGAGCTGATCCAGACGGAGGCCGCCGAGGGCCGGCCCGTGCGCGTGGTGG…
>Zm00001d004524
ATGACCAGGCTTGTCCCCCTGCAGCTGCTCGTGGTGGTCGTCGGAGCAGCAGCCATCACCGTCGCAACGGCATCGGCGGCGCACGTCGACTCCTTCAGCTACCCGACCTTCGACGCCACCACGACGCAGGACCTCGTGGCGGCAACAAACACCTCCATCCTGACGTCGGCCTCCCTCCTCTTCGGCCACGACGCCGACTTCAACTTCAACCGCACCGAGGGCTTCATCCTGCTCTCGCGCACCGTCGACGTCTGGCGCGCCGGCCCCGGCGGCGGGCCGGCGCGCGAGGCCTCCTTCAACACCAGCTTCGCGCTGAGCGGCGCCGCGCCCGTCGCGTACGTCGTACTCCGCGACAGCTACCCGCCGCTGCACGGCACGGGCGGCCTCCGCGGCTTCGCC…
>Zm00001d004531
ATGCCGGCGTGCGTTGCGGGCCTCATCCCCGCCGTCGTCCTCGCCAACTACACCAAGTCGCAGTACAATCGGTTCCTCAACGACAGCCAGTTCTCCGGCGTCGAGATCGCGAGCGAGGGCGACTGGGTCGTGGTCGTGCTCAGCACCAGCACGGGATCCGGCGACTACTCACCCGTGATGCTCAACGTGCGCATCCAGTCATTGCCATGCTTTGAGCAGGAAGGAATGGTCTGGATTTGGCCTAGGGATGACCCACCAAAGGCTACAATCCCTTCTCTTCTGCCTCCTTCAGGATTTACAGTTCATGCAGAGATAGTGATGGAACTGCCAGTTGAACATGGACTACTCCTGGATAACCTCTTGGACCTTGCTCATGCTCCTTTTACACACACATCCACC…
>Zm00001d004753
ATGGCCAGGAAAGAAGTGACGCTCCTGCTCTTCCTCGTGCTGCTTGTCGCAGCCGTCGAGGCACAGCTGCACGACGAGCCTACGGCGGCCGCTGTCGGGCGGCGGCGTGGCGCGAAGGCCGCCACGGCGCCGACGCACCTCCACTTCTTCTTCCACGACACGGTGAGCGGCAAGTCGCCGACGGCGGTACGCGTGGTGAGCCCGCCGGCGTCGTCGCCGTCGCCCGTGTTCGGGATGGTGAACGTGATGGACGACCCGCTGACGGAAGGGCCGGAGCAAGGGTCGGCCCCCGTCGGCCGCGCCCAGGGCCTGTACATGGGGTCCGACCAGGCCAAGATCGGCTTCCTGCAGGCCATGAACCTCGTGTTCACCGCGGGGGACTACAACGGCAGCACGCTC…
>Zm00001d004758
ATGGCTGGCCCCACCACCACGCTCCTCCTCCTGCTGCTGTGCTCCGCTGGGCTCGCGTCCGGCGCCACGGCGGCTGACGACAGCGGGTTCACTACCTTCAAGGTATACTTCCACGACATCGTGGCGGGGACGAGCCCGACGGCCATCCGCATCGCGCAGGGGGCGGCGTCCAACACCTCGTCCACCAGCTTCGGCGCGATGGTGGCCATCGACGACCCGCTGACGACGGGCCCCACGCGCGCCGCGGGCACCGAGGTGGGCCGCGCCCAGGGCACCTACACGTTCGCGGACCAGCAGACGTTCGGCCTCCTCATGGTGATGGACTTCGTGTTCACGGCCGGGGAGCACAAGGGCAGCACGCTCTCCATCCTCGGCCGCAACGAGGTGCTCAGCGACGTC…
>Zm00001d004978
GAACGGCCTAGGCGCTAGCGATAAGCCCCGCCCACCGCGCGCGCGCCGCGGCACCGTACCGGGATGGGCGCCATAGGCATCGTCGTCAGAGCGTGCGCGCCTCTCGCTCCCGCCGCCGCGGCCGCGCCGGCACCCTCCGGCTCCAGCTCCAGGGACGCCGCTCAGGCCCAGCGGTGGAGCAAGCCCACGAGGACCGGCCGCGTGCTCGTGCTCGGCGGCACTGGCCGTGTCGGAGGATCCACGGCCACCGCACTCTCCAAACTCCGCCCTGACCTCGGCATCCTCGTCGGTGGCAGAAACCGCTTTGACAGGGAGAAAGGCGAGTCCATTGCAGCCAAGCTTGGGGGCCAATCTGAGTTCGTCCAGGTCGACACCCGCAACGCAGGCATGTTGGAGGAA…
>Zm00001d005030
ACCAGGCCAGTGCCGTTCCGATGGTCATTCCAAGCCAGTGCCATTCTCCTTTGGCCGTCCCTGCTCCAGCCGTGAGCTCACCCAGGCCACGGCCTCGTCGAACCGCACAGCCCCTGCGCTCCTTCCCCAGCCGCGCTTAGCCCTATCCTCCCTGCTCGATCTCCTTCGAGCCGTAACGGCTCCCTGGCGTGTCCGGCTCCCTGCCCCTCTCCATGGCGTCGCCCAGCTCTAGCTCGCCCCCCCTCTGATCTGTGCGCAGGGGTTTCTTCCATGGCGAGCTCCCCTGCAAACTTCATCTAGCCGCCGGCCGAGTTTCTTTGGTGGTCGCTTACCCCCAGCATCGGCCAGAGCTTGCTGTCATTCCCCAACAAACATGTGGTTGTAGGTGAGAGATTTCAG…
>Zm00001d005315
ATGGGTTCCCGCTACGAGGTGGAGGTCACCGTCGGCTCCGCCCGGGACCTCAAGAACGTCAACTGGCGCAACGGCGACCTCAAGCCCTACGCCGTGGTGTGGATCGACTCCGGCAGCAAGTGCTCGACCCGCGTCGACCTCGACAACGGCGAGAGCCCGGCGTGGGACGAGAAGCTGCTCGTCCCGCTCCCGCCCACCTCCCGCCTCGACGACGCCGTCCTCTACGTCGACGTCGTCCACGCCAACGCCGCCCAGGGCGTCAAGCCGCTCGTCGGCTCCGCGCGCCTCCCGCTCCGCGACGTCCTCGACGACGCCGGGGTCGGGGGCAAGGCCTCGCGCAGCCTCCGCCTCAAGCGCCCCTCGGGCCGCCCCCACGGCCGCCTCGACGTCCGCGTCGCC…
>Zm00001d005430
ATGTCGCGGCTGCACGCGGACTACTCCAGCTGCTCGGAGCAGGTGATGTCCCCGAAGCAGCTGGCGTGCGACCGGGAGGTGCAGAGCCAGCCCAAGATCAGCAAATGGGAGCGGACCTTCGCCTCCGATCCCGTGAACCCCGCGGGCTCCATGCTCGACCCCGGAGGGATCTCTGGGAGTGGGCATCCCTGGTGTCGCCCTTCTTCGCCCGTTGTTGACAACGGACACGCTGGAGCGACAGAGCTGCGGTATCAGGACGTGGAGGTGGACACGAGGCGGTGCGAGCGCCTATCTGCGGAACTGGAGCTGGAGTGGTCGGCGTTGCGAGCCTGCGAGGCACTGGTGCCACGTATAACTCCAGCATCCGGATGGAGCCAGAGCAGTCGTCGCCAGCCAGGA…
>Zm00001d005624
ATGCCGCCCTCTGCCGACGCAATGCCGGCCCCCGGAGACGCCGCGTGCGCCGGCGACGTGCGCTTGATCTCCTCCAAGGAGCTCCGCGAGCACGCGTCCGCCGCCGACCTCTGGATCTCCATCTCGGGCGACGTGTACGACGTGACGCCCTGGCTTCCCCACCACCCGGGCGGCGACCTCCCGCTCATCACCTTGGCGGGGCAGGACGCCACCGACGCCTTCGCCGCCTACCACCCGCCCTCGGCGCGCCCGCTCCTCCGCCGCTTCTTCGTCGGCCGCCTCTCCGACTACACCGTCTCCCCCGCGTCCGCCGACTACCGCCGCCTCCTGGCGCAGCTCTCCTCCGCGGGCCTCTTCGAGCGCGTCGGCCCCACCCCCAGGGTACAGCTCGCCCTGATG…
>Zm00001d005630
GACGAGAACAATGCGTGATCAGATGAGATTTGAAGGAGAACCTGATGCTCAACCCCATCCTCTGTGGGCATCGGTTGCAAAGCACCTGATTCTCCATTCCACCTGGTGAGTGGTGAGCCTGAGCCCCAGTACATGGATCGATGGTTGGTTATACTACACATAGCGACACCCTCAAAGAACTCATCGGTCATCACCCTCCCCGGTGGTCACCACAATGGGAGATGAGATGAGTGACGGCCGGCGGGCAGACGGGAGCTACGGGCCGGAGTACGGCCCCGTCCCTCGTGAGTTTCAGCACGCCTGGTACCCTCAGTTGCCATCCAGGACCAGGAGGAGGTCCCCGTGGCCTCTGCATCATGGGGATTACCCTTGGAGGCTTTCGGAGCACAGGTTCAGAAG…
>Zm00001d005695
GGTCCCTCGTTCAGTTGTTCCTCAACCTACCTACGCCGCTCCGCGCTCGACCGCCTTTGCCTGCCTTCCCATTCCCCCCGTCTCCTCTTCCCTTCCGCCATGGCCCAGCCCGCTTTCCTCTCCTCTCTCCGCTCCCGCCTCGGCTCCGCGCCGCCGCCCCCGCCGAACCATCGCCTCCAGCCCAGGCGCGGCTACCACGTCGAGCTTGGGGCTCGCGAAAAAGCGCTTTTGGAGGAGGATGTTGCTTTGAAGAGGTTCAAATCATACAAAAACAGTGTGAAACAGGTCTCCAAGATCGGGAATGCTCTCACTTTAGCTGTTGTACTTGCTTGCAGCTACGAGCTTGCTGTGTTGGCGACTAGCACAAAATGAAGGAAAACTCAGTCATGTGGCGGCACG…
>Zm00001d005742
CGACGACCGCGACCGGTGGGCGGCGGAGGCAAGCTGGGTGGGTTTCTACTTCTACTACTACTACCACACGCGCGCGCGATCTCGCGAGCACAGGTGGTTTCATCAGCTCACACACAGAGAACAGGATCAGGATCAGGACAGATGGGAGCCGAGAACGGTAGCAACAACCCTTCGTCGACCGTCTTGGATGGCCTCTACGGGGTGCAGCTCGGCCGTCCATCGGATCCGGCACAGACCGACGGTGGGGCGTCGTCGTCACCAGCAGCTTGTGAACACCACCACAAGCGTGGCCGTGGTGGTACAGCACAGGCACAGCAGAGGTTGCAGATCCGAAGGCTATGGCAGCACAGACCGTCTTGCTTCAAGCCCATCCACTGCACCATTACGTGTACGTGTTTG…
>Zm00001d005859
ATGAAGCTAAGACTGGTAGCGCTAGTGCTAGCGGTAGCGTCGGTGTACGCTTGCTCGTCGGCGGCATCAGCGTTCGCGGGGGACGACGTCGTCCGTGTCGCGCTAAAGCATGTCGACGCTGGGAAGCAGCTGTCCAGGCCCGAGCTGATCCGGCGCGCCATGCGGCGGAGCAAGGCGAGGGCGGCCGCGCTGTCCGCGGTGAGGAACCGCGCCCGCTTCTCTGGCAAGAACGAGCAGCAAACGCCCGCCGGCGTGCTGCCGGTGCGCCCGTCGGGGGACCTCGAGTACGTCGTCGACCTCGCCATCGGCACGCCGCCGCAGCCCGTCTCGGCGCTGCTCGACACCGGCAGCGACCTCATCTGGACGCAGTGCGCGCCGTGCGCCAGCTGCCTCTCGCAG…
>Zm00001d005879
ATGGAGCCGGAGATGGAGGCGGCGCTGATCAAGGTCGGGATGTTCGTGCTGGTGCAGGCACTGGTGTACCTCATCCTGTCGCAGTCCTCCACCGTGTTCTCGCGCACCAAGAGCCTTGCCCTCCGCCCCGCGCGGTCGCTCAGCGCGCGCCGCATGCTCGCGCTGCTCTCCGACCTGCCGCTCGTCGCCGGGGAGCCCTCGCCCGTCGCCGCCTTCGCCCGGACGCGGTCCGCGTTGTCGCCCATGCTCGCCGCCGCCGGCCGGAAGCAGGACTGA
>Zm00001d006069
CTGTAACCCAAACTCAGCATCCAGACTAGAGTACTCCCGGTGCCATCTCCTCCATCTCCCTATTCCTCCTCAGCTCCTGGACCAGACATGGCCGCACCTTCCGGCACGATGCGCGCCGTGCAGTACGACAGATACGGCGGAGGAGCACAGGGGCTCAAGCATGTGGAGGTGCCGATCCCGTCGCCGAAGAAAGGCGAGGTGCTCATCAGGATGGAGGCCACCAGCATCAACGTCGTCGACTGGAAGTTCCAGAACGGCTTCGCGCGGCCCTTCATGCCCAGGAGGTTCCCTTTCATCTCTGTTTTGGCTTTTGACGTGCCGTCCCGAGTGCGTGTGCGCATGAGGACGGGAGAGTTGCACAGGCGAGTAATCGTGTTTGCTTTCTGGAGGACAGGTTAC…
>Zm00001d006103
GAGAGAAAGGGGAGGGAGGGGCAGATAAAGAACACTGCACCATTTGATTTGTGTGCTCCTGCAGTCTACACCCTCACTTGCTTTCAAACGTGCACCTCCCCTCTTCTTCTTCTTCCTCCTCCCCTCATCTCCTTCCAACAACGCCATAACCACAGCTTCCCTCTCCTCCTCTCTCTTGTTGCACGAATATGACGCCATAACCACAGCTTCCCCGTGAACGACAAGGAGAAGCAGAGAGTGCTACATAGGTACATGTAGGGTACTATAGGATAAGAACTATACAGCTAGGAGGTAGCGGAGGGAGGAGCACGCCGCCAGCAGTAGGGATGTACAAGAACCAGCTCCAAGAACTGGCGCAGAGGAGCTGCTTCAGCCTGCCGTCGTACGTGTGCACGCGCG…
>Zm00001d006126
CCGATCCCCTCAGAGCTAGGAGTGGGGACCAGGGGAGCTGGGAGTTTGCGGCTTCAGCTGCTGCTGCGAGCCTGCGACCTCCGAGGCGGAGCTCAATGGAGTTATCCACTCCCGTCGGGAGCTCCCTTGCTAGAACTGCGACCATGGCCCTCGTTAGCCCCAGCTTCAAGATAACCAATCAAATGTGTGCCAGGGGTATGCCACTTGAATGCCAATTTCCTCATAGGCTACCATCTGTAGCTTGTTCAATGTTGTTAAACACACAACCTTCACAACGAACCAACCATAAAGATTGTGGTTTGCTTCAGGTGCAATGTACAGAAAACCTTATGCAGTCGCCAGTATCTTTCAGTGACTTCTCTGTTTCAGTGTGTGCTCAAGAGGATGGTCTGATAAAGC…
>Zm00001d006256
ATGGAGAAGAAGCAGAAGAAGCACGCACACGCGAGGTCAAGGAGCTTCACCGGCGGCGGGCTGGCCTCCTTCCTCAGGTCCACCGTCTCCTCCTTCTCCTCCGCCTTCCCGCCCAGCGGCAGGAGGTCCTCCTTCAACCACCGCAACGCCTTCTCGGGCCCCATCGTCGTCTCCATCGTCCCGCCGGAGGCTCGCGGCGGCGGCGGCAGGAGGAAGCGCCCGGGGTACGTGACGCCCGAGCCGTCGTCGCCCAAGGTGTCCTGCATCGGCCAGATCAAGCGCAGCAACTCCAGGCGCCAGAAGAAGGTCAACCCGTCGTGCGGCAAGGGCGGCGGCGCCTGCCCGCTCCCGCCGAGGCCGCCAGCGGAGGACAAGAAGCCCTGCAGCAGGACCAGCAGC…
>Zm00001d006596
GTAGTATATCTTAACTGTTGTTTTGCGTGACTGCGTGCTATATAAATATATATCCTTTCTGCTGTTTCTTGTGAATCAGCTGCACCACCCGTTGCCATGGGGAAGGAGAAGGTTCACATCAACATTGTGGTCATTGGCCATGTCGACTCCGGCAAGTCCACCACCACCGGCCACCTCATCTACAAGCTTGGAGGCATCGACAAGCGTGTCATCGAGAGGTTCGAGAAGGAGGCGGCCGAGATGAACAAGAGGTCCTTCAAGTACGCCTGGGTGCTCGACAAGCTCAAGGCCGAGCGGGAGAGGGGCATCACCATTGACATTGCCCTGTGGAAGTTTGAGACCAACAAGTACTACTGCACTGTGATTGACGCTCCTGGGCACCGTGACTTCATCAAGAAC…
>Zm00001d006678
CACCGCCCGGGCGGCCACTCCACTTCCTCCCCTGCTGCACTGACGCGCCCAGCGCCAAAGCATCCTTTCACCTCAAAGATAAGGAGGCCGTAACCTGTCGGGGCCCTCCCCCAATCTCCAGCGACGCCGTCCCCCCCAACTCGCCACCCATGGCCATGTCGTTCCACTTCCACCCGCTGGCCGCCTCGCGCGTCCACTTCTCCCCACTCCCGTTCGCCGCCGCCGCGGGGGCGCCCTCCCCCTCCTCCTCCGTCGCCATCGCGGCGCACCACCAGCACGGTCGCCGCCGCTTCTCCGCCATCGTGGCCACGGCGGCCGCCGCGTCGGCGGCGACCACGGAGTTCGACTTCAAGGCGTACATGGGGGAGCGCGCGGTCGCGGTGAACCGGGCCCTGGACG…
>Zm00001d006697
GCACAGCGCTGCACACCACCTTATCATCTCTAATCGGAGATCAAAGAAGCACAGCCGTTAACGATGGCTTCCGACGAGCTGGCAAAGGTCGTCGAGCCGAGGAAAAAGGGCAACGTCAAGTACGCCTCCATCTGTGCCATCCTCGCCTCCATGGCCTCCGTCATCCTTGGCTATGACATCGGGGTGATGAGTGGAGCGGCGATGTACATCAAGAAGGACCTGAGGATCACGGACGTGCAGCTGGAGATCCTGATAGGGATCCTGAGCCTCTACTCGCTCTTCGGGTCCTTCGCCGGCGCGCGCACGTCCGACAGGATCGGGCGCCGCCTGACCGTGGTCTTCGCCGCCGTCATCTTCTTCGCGGGGTCGCTGCTCATGGGCTTCGCCGTGAACTACGGC…
>Zm00001d006738
AGGCGCGCCCCGCAGGAATTGCGGTCAGGAGAACCTCATCCCTCTCGCCTTCAGGTTCTACTCGCCCTCTCCCCACCCGCAGCGCCTCCTCCCATTCCCCCAACGGACATTGCCTAGGAGGCTAGGACAGAACCACCCAGAGCGCACAACCTTACCCGAATCGCCGTTGCATGGAGGCCGTGCGCGCGTCGGCGGCGTGGGTCGCCAGTCGCTCCTCCCATGTCACGGTCGACCTTCAAGAAATTGAGAAGGTAGTGGACCAAATCCAAGGAGATGTTCCAAAAGTTGAGTGGGATTACGAAGGAATTCACTACTTTGACAATGGGCCACTCACAGTCCAGTACCTGTTCGTCTTGGATGCACTAAACTTCTGCTTCTGGCCAGATAAGGACTTGAGCT…
>Zm00001d006835
GCCCCGTATCACTCCTCAGTTGCTTCGACGTATTTCTCTCTCTATCTATACGATTCCGAAGAAGGTAGAGAGAGAAACTCGAAGGGGAGAGGACAGAAGAGGGAGATACAGGTACACTGCCCCTGACCCCTCCTCGATTGGTCAGTTCTGTTCTTGAGCGCACTGCCACCACAGATTGGACGGCTTGTCTGCTCTCCGTTCCCGGAGTGGCGTCGTGCTCACTCTGCTGGGTTGCTTTGCCTTATAGTCTTGCTCTGCGGTTTGATTTGCTTCATCTTTTTTTTTCTTCAATCTTGTCACTCCTAAGGTTTCCCCCCTCTGGTTTTCTTGATTCCCCGCTTGGGAATTTGTGAAGTTTAACAGGATTTTTTTGGCTGAGTTCGCATGTTTCTGTTCTTG…
>Zm00001d006883
ATGGAGGTGGTGGTGCCTGTCATGGCGCCAAGTGCGCCGTGCAGCCCAAGAACCGCGGCCATCGCCGGCGACCACCTCCCGGCCTACTGCTACTTCTACTCCAGCGCGCCGACGAGCCCGTCCAGGGCGAGCTGCGCGGGGGGCGCCGCCACCGCCACGACCACGACGCCGGGCTCGGGCGACGAGGCCACGTTCGACTTCACGCTCGGCTTCAGCGGGCAGCTGCAGGAGGCCACGCCGACCCTCGCGGCCGCCGACGAGCTCTTCGAGGGCGGCAGGATCCGGCCGCTGAACACGCCGCACCCGAGCATCCCGCTGGCCGACGACGCCTCGAGCTCCTCCTATTCCGGTGGCCCTCGGTGGTCCCCGAGAAGAGCCGGCGGCGCGGATCGTCGGGCG…
>Zm00001d007015
ATGGCGGCGCCGCGGCCGCTCCTGCGCCGGATGCTCTCGTTCCGGGAGCCACTCCTGCTCCTCCCGTGCTTGCTCAGCGTCCTGGGCGCCGCGGCCTCGGCGCTGGCCCGCAGCCACGCGTCGCTGCTGCACTCGCTGGCCAGATCGCTCGTCCGGCCCGCGCCCGCAGCCGTCAACGACAACATGAAGCACGCCGCCGCGCACGCGCCGTCGTCCGCCGCCGCCGCCGCAACGCGCCCGGACGACGGCGAGGACGCCGTCGCGGCGCTGAGCAAGGCGGAGGTGGAGGCGGTCATGGCGGCGATCGGGCTGGCGGCGTCCGGGCGCGGCGAGGGCCTGGCTGCCGCCGTGGGCCGCGGCGACGTCGCCGGGCTCTTCGACGCCGACGAGCCCAGCTTC…
>Zm00001d007092
ATACTGATTTTTAGATTGAAACTGGTCTCAATGTCATTTCTACATATGAACCATATAGAGTTTACTCACATATACACATTTCAATCCAATCCTAACGACACATGGCACTACTGTTATGCATTCGAAGAAAGAAAACAAGAAGCGCTCACGCCGTCACGCGTCCGGAAGCCAAGCTGGTCGCCCGTCCGCCATCCTTTCCAAATCTGCACCAAATCGGCCTCCTGCCTGAAACACACGCGAGGGGCCTTCTCCCGCGGCCTCCCCGCTCGCGTAGCCCCGGCGCCCGCTCTCTGCTGCTCTAGGGTTTGCCTTCAATGGGGAACCAGAAAAGGCGGGGATTGATGAGTTAGAGACATTCATGGGCAAAAGGGTCATTTCGCGTCTAGTTGGCACCAAGGT…
>Zm00001d007157
GAGCTGGCAGCACTCTCACTCGCTCGTCTCTTCCCTGGCTCCTATGCGCGCGTGACGGCTTGGCTCGCCCTTGACCTTTTGGATGCATGCCGGTGACAACTGGCGACGAGCATCGCCATTGGCAGCATCAGTTCTGCCTCATCCAGCAACTGTTTTCTTATAGTACAGTATCTCCAGCAGGCACCGCAGCATCCCCTACCCTAGCTAGATCGGCCAGCTTGGTTGGAGAGTTAAAAACAAGTGCCGACATGGCGCACCTTCTGTGTTTAAAGTTCCACTTCCACCGAGCACTGACCACCCACTGAGCCCGTGAATTCGCCGGCCGGGCCCTAGCTAGCTATTAGTCTACTATATAAGTGGAGATGCCTTCCACCGTGTAGCACGCAACCAGACAGCACC…
>Zm00001d007340
CAGGTCCAAGTAGTTCGTTTCGTGAGTTATCCAAAGTTGCGCCGCAAAGATGAGTACCGCTAATCGCTACCAACACATCAAGTCAACTAAGCCTGTTGTAGGCAAAGCAAGAAAATTGAAGGATCTCATGATAAAAAGTGACAATAGGATATGTGCTGACTGTGGTGCACCTGATCCCAAATGGGCATCTGCTAATATTGGAGTGTTTCTTTGCTTAAAATGTGGAGATGTTCATAGGGCACTTGGACCTGACATCTCAAAGGTTTTATCTGTAACTTTGGATGATTGGTCTGATAGTGATATCGACTCCATGGTTGAGGTTGGTGGAAACTCACATGCAAATTCAATTTATGAGGCTTTTCTTCCAAAAGATCACCTAAAACCCAAACCAGATTCAAC…
>Zm00001d007391
CCACTCTGTGGTTACCAAGATTCTATCCAACTTTTCATACGTAGGTCTTTCGAGGTTATTTGCCCAAGTGAATTAGCGACCAGTCATCTCTAGTTCCTTAAGACATAGACCATCAATAACGGCATTAAAAAGAAATGGCCACCGATGATCAAAATTGTCTTTATTTTTTTCGCTAGAGAATCTTAAGATATTAAAATCACCACCAATCACAAGAGGCAGCGTTTCATGGTTGCCCATGCGAACCAGTTCAGATAAGAACATCTCTTTTCTAATTGAGCCGGGCCATAAACCAATGTCAAAGCCCACTTGAAGCAATCATTTTTATTGCACAAAGTGAATTTAACAAAAAAAATCTCCTTCTTCTATAGCCCCAATATCATAAATGTCCAAATCAACACC…
>Zm00001d007486
ATGAAGGCCGGGCCTCCGCACGTGGCCATGCTGGCCACGCCGGGGATGGGCCACCTGATCCCGCTAGCGGAGCTGGCCAAGCGCCTGGCGGCGCGGCGCGGTGCCACGGCCACGCTCATCACCTTCGCGTCCGCCGCGTCGGCCACGCAGCGCGCGTTCCTGGCGTCTCTCCCGCCCTCCGTCGCCGCGCGCGCGCTCCCGCCCGTCGACCTCTCCGACCTGCCCCGCGACGCCGCCATCGAGACGCTGATGACCGCGGAGTGCGCGCGCTCGCTCCCCGCGATCGCGGCCGTGCTCGCGGAGCTCGGCGAGACCGCCCGCCTCGTCGCGTTCGTCGTCGACCAGTTCGGGATGGAGGCCTTCAACGCCGCCGGCGTCAGGGCGGCGCGGTGCCTCTTC…
>Zm00001d007644
ATGCTAATCATACAAAGCAATGCAGACTCCAACTTCTTTGTGGTAGCTTTGTGCTATATTTATCACACTTTGTGGTCCAATACCATGATGTGCACAACTTTTCAGCGAGAGATGTTGGGTCCTGCTGTTACCGGCACCATAAACGCACTCAAGGCTGCGTCTGCTGCAAATGCTCGTCGAGTGGTCGTCGTTTCATCCATGGTTGCTGTTGAGATCAACCCGAAAGACTGGCCCAAAGACAAGATCAAAGATGAGAACTGCTGGTCAGATAAAGAGTTCTGCAGGAACGAAGAGAACTGGTATTTTGTTGCCAAGATCTCGTCAGAAGAGGCCGCACTTGAATACGCGAAGCAGACTAGGCTGGATGTTGTGACGGTCAATCCAGCTGTGGTCTTCGGC…
>Zm00001d007655
AGAATTGCGGCCTCGATCCGCGCTCTCCAGGTTCCCCCAGATTGACGCGTCCGCGCCGCGCTTGCCCAGATCGATGGAATCTGCGGTCTCCAGATGCGAGTCCGGGGCTCGCTATCTGTGGAAGGCGAGGAGAGACGAAGTGACCTCGTCCATGCCTCCACCGTTGGACGAGAATATCTTCTCCGATCTCACCCTCTTCGCTCCACCGCAGGAGCCGCTCTCGCTAGAGAAGAAGTTGTGCCTCGTCATGGGCCTCCACGACGGATCAACCAAGGTGGGCGCCCCTCTTTCCCCTCCCTATATTTGAGTCGAATCTAACCCAATTATGTCGGTCTCGGGTGCGATTTGGCTAATTTGGGCGCCATGGCCTAGGTCAGCGTACAGATCTGGTTAGAAACT…
>Zm00001d007687
GCAAAGAGCCAAAGACTGCCGGCACCGCTGCTAGCTTGCTAGCATACTTCCCCTACACGCGCGCGCAACCGCAAGCAGTCGATCGTCGCATGGCGCCAGGAGGCAGCGGCGAGCGGTGGAGCCTGGCCGGCGCGACAGCGCTGGTCACCGGTGGCAGCAAGGGGATCGGGCAAGCCGTCGTGGAGGAGCTGGCCAGGCTCGGCGCGCGCGTGCACACGTGCGCCCGCAGCGCGGCGGACCTGGAGGAGTGCCGCCGGCGGTGGGCCGAGAAGGGGCTCCGCGTCACCGTCTCCGTGTGCGACGTCGCCGTGCGCGCCGACCGGGAGAGGCTCGTCCTGGACACGGTCAGCGCGGCCTTCGACGGCAAGCTCGATATCCTGGTCAACAACGCTGCGCTGC…
>Zm00001d007725
ATGTGGATATATGGCAGTGACGACGGTACGACATCAATCACGAACACCTGCCTCCACATCGCGGCTCTCTGCGGCCACCAGAACTTCTGCAGCGAGGTCCTGGCGCAGGAGTCGCGTCTCCATCGTCCCGGCCCGTCGTCTCTGCTCTCCACCACCAACGACGACGGCGAGACGCCGCTGCTCGTCGCCGTGAAGAGCGGCCGTGTCTCTCTGGCCCTTCATCTGCTCGACCAGCACTACTCGAGGCATAATCTGCTGGTGGAGCATCTTCTTAAGCAAGACACTGGCAAATGCAACGTTCTGCACCACGCGATCCGCAACGGCTACGTGGACCTGGCGCTGGAACTGATCCACCGGCAGCCGGCGCTCTCGGAGTCCTGCAACGCGCGCGACGAGTCA…
>Zm00001d007753
ATGCCATCACGAATGTGGAACCTCAACAAAGCCCTGGTCACCTCACTACTCTGCATCTCGGCGTTGTCGTCGTCGCCATGGCCATGCACGGCAGCCGGTCAGCTGGGCGGCAAGCCCCTGGTCACCGCCGTCACCAAGGACGCGTCCACCTCCCTCTACACGGCGCCGCTCAAGGACGGCCACCCGCTCGTCCTCGACCTCACTAGCCCGGTCATCTCGCTGGCCACGTGCGCCAGCTCCTCCAAGAACAACAACGGCACGCTCACCGCCACGCTATCCGCCAACGCCACCGACGGCCAGAACCCGCTGTTCCCGGTCTCCTTCTCGGCGGTGGCCACGTGCGCGCCGTCGTCCAAGCTGCCCGCCGGCGCCGGCGCCGTCGGCGTCGCGGGGCTCGCG…
>Zm00001d007869
ATGGCAACCCCGACCGTCGTCTTGCTTCCCGTCTGGGGCGCCGGCCACCTCATGCCCATGCTAGAAGCGGGCAAGCGGCTGCTGGGCAGCGTTGGCGGGGGGCGCGCGCTCTCGGTGACAGTGCTGGTCATGCGGCCGCCGACGGAGCATGAGGCGCGCGGGCTCGAGAGCGTCATACGCCGGGCGGAGGAGGCGGCCGCGGGCCTCGACGTGCGCTTCCACCGCCTCCCCGGCGTGGAGGCCCCGGCGGGGTGCGCGGGCCCCGTGGAGTTCATCTCCCGGGTCGTGGAGCTGCACGCGCCGCACGTGAGGGCGGCCGTGGCGGGCCTGGCGTGCCCCGTGGCCGCGCTGCTGCTCGACCTCTTCTGCACCCCGCTGCTCGACGTGGCCCGCGATCTG…
>Zm00001d007890
AGCCACCAATCCGACTCTCGTCCCTCCCCGACTCACCCCACTGCCCAGCCGCACGCGCCGCCGTGTGTTCGCGCTCTCTCCCACTGTGTCTGTGACGACTGGGTAGGCTACAGCCGCCGCCCGTCGCCAGGTGCCGATCCCTTCGCCGACGAAGAGCATCCACCAGAGAGAAATCGACTTCACTAGATCCGCACCTGGGCTGGATGGTTTGACGCCATGTATGATGTTTCGATCGTTTCAGGCTCCGGCCAAGGGCGTGATGGCGGCTGTAGGGAGCTTGCAGCCGGGGGTGGAGACTCTACATGTGCAGGATTACAAGGACGCGCCTCCAGCCAAGGCTGTGGCGGCCGCGGTAGAGAGCTTGCAGCCGGCGATGGAGAGCCTACATGTGCAGGAATT…
>Novel00569
ATGGATTACATGGATCTTGTGCTTTGGATGGTTACAGTTCTTTTTTGGGAGGAAGGACAAAAGCAACAGCCTCGACAAACCTGAAGTTTGAACGTATGACAGATGACATCTTGGTTACTTTTGTGGATGGACATCTTGGTCGCTTTTGTGGTTGGCTTTTGTAGATGGAGTGAAGTTGCAATTGTAGTTGTGTAAGATTTATGTGCATAACTATGTGGGTTGCATCAGCTCCCAGTACTATGTATATACCTCCCGCGTAGCTGCCTACCTATCCCTAACTCGCGACCCCTAAACGTAGACTTCGATCCTATAATCTTATTTGGGATCAGTTTCAGGCTATAATAGCCTCGGTCGTCTTACTATGGAACACGTTAAAGTATG
>Novel00587
TGCAAGTGATGTGGTGCCACCCACAAGATGCAGTCGGTGGACGACCCAAGGAAGGATGGACTTAACCAGTGGATGCTCGCCAAGCGAGTACCTCCCCAGCAAACACTCTCTAAGTGTTAAATTAAAGGTACATCCTTGATTTAGTTGATGGTGTGACTTGGCCTTCGTCCCTGCCACCGGGACAGACGGTCGAGTGAGTTACTGCTTCCGCAGGAGAGGACTAGGTGGAGTAGCGTGGCCAGGCTTCGGCATGTTACTCGGTTTTCTCCGTTAGTTATTTCCGCTGCATTAAAATTTATGGTTATTATTTCTGAAACCCCGATAATGTAACCACTAATGATACTTATTAAATTTGT
>Novel00636
GTTCATATAGGGAGTTTCTGTTAGGTTCTAAAATTTCTGATGACTTTATTGAGTCTCTAATAATGAAGAATTATTATTGTTATGTCTCTAATATATTATTGCTATGTCTTATTAGGTACATATTTATAGACATGATCAAAGGTGAAAAGTAATCTGTTCACAGTTTTAAAAACCATTGATCTATCATACCTCCTCTTAGCGCTAAGATTATAAGCTATCGATGAAGCAAACAAAGTGGAAGGCATGTCGTGGCATACGAATTACAAGGAGTTTTTATGTTAACATCAACGAAAGTGTTAGGTTTAAGTAGCATATATTGTATGTTTCAGCAAATCGGAGTCAGATGTGAATATCTTAAGCAAACAAAATTGTTGCTTACACTGGGAGTGGGAGGAGAGT…
>Novel00654
CACTTGTGACTTAATCAGCTACTTATAGCTTTTATTAGGCTGTATATTGCTCAGTCCTGTAAGTTTGGTGTTACACATTGCACATTTGCTTTAAACCAATGGCTTTTCTATCAATAAGAAAAACTAGGAAAAAGTAGTTGTGATTCTGATAATTTTGAACGACCATACTTGGGATAAAGTTTGAATGTTTTCTCTTTTCTTACCAAAGTTCTAACATAGCATTTTCACATTTCTTCCATGGTATACAGTTTGCTGCAGGAATCCACAAACTGAGTCTTTTCTTCGCCTTCTGGAACTCCCATATCTGCCAGACTCATCTAAATCTGAGGATATGTCTCTTGTGATTGGAAACACACTTGATGGTGAAGATATGGAGCTACCAGATGAAGATGAGGATGC…
>Novel00672
GTCAGCTTGTTCTGGGTGGAACACCATTGCTTCGAAGCCTTTCTGTACGCCGCAAGGATTTTCTCCATCTGGTTCATCATCAAGATCAATGTTGTTACTCACATAAGTTTGCTAAGGCATGATTAACACAACATAACAGACCTGCATAAAAACCATAGGAAACAAGATGCCACGGACAAAAGGAAAAGGCATAAATTCAATTGCAACTGGACTAATCTGTGATGCGAAGTCGTAAATGTTTGCACAGATCAAGCATTGTTAATTAATGAGAGAATATGACATATTTACTAAGACACAGGGTTTAGACACAGCCTATTGTATCACACTATGTCTTAGCTGTATCTTATGTTTGGAGTACCATGTCACGGTGTCACTGTTGTGCATGCCCTTATATAACAA…
>Novel00676
TCGACATCAATTATATTCAAATTGTACGTTGCTACTTAATTGCCGGCCATGGACAAGAAATCGAGTTGCTAGGAACCTGCCTGGGATGGACTGTATTCTAATCTTATCCCTTGATACTAAATCTTATCTCATAGTAAGTGCTAGCATCATATAAAAGGCGAGCTGGCAAGGAAGGAGAAGACAACCTCTCTGTAAGAATCAATACCTACCCCATGGAGAAGCTCTCTTCTCGTCGCTATTCCCGGCCGGCGATGTCCCTGCTGATCATCGTGGCCATCACTATCTCCTGCTCCGTCGTCCACAGTTCGGAGGCTCCAGCCCAAGAAGCAGCAGTACCTCGTCTGGACGGAGACCATCAGGGCCAAGCGCCGCCGCCACCGGATGCCGGCAAACCTCGAC…
>Novel00713
CTCTGTTGTGGCATAATACTACTTCTGTTGTTCTGTCTCTAAAAGAATATCCTTTTGGCTTGTTCAGATGTATAGCCAGAGTGACATATATTTTGGGAACATGTTGTATATTTTTATATATAATGGTACTTAATTTAATCTTTATTCCCAGGTCACGGAGGCTGACATTGAAGAATTTGAAGCTAAATATAGAGGGTCAGATTCTGAGAAAACGGACTTGAAGGAACTCTACACAAAATATAAGGGCAACATGAACATGTGATTTCTTTGAATTTTAATTTCCTTTTATGCTTGTTCAAACCTTTATCCTGAAAGCTGTAAACTGGTCCAACAGGCTTGTTTTAATTTCTATATTGGCATTGTTCCCTTCTATTCAGGCTTTTCTGCACAATGATTTGC…
>Novel00755
TTTTCATCATGCTAAAATATTTTCCTATTGAGTCAAAAGGGAGGCAACAAAAGCTGAGAGAAGTCGGCAGAGTTGCCACCATATGTTTCTGTTGTTTCTCGGCACGATGCATAATGATGTGCTTCAATGCATTTGACGAGGAAGCTAACCTCGATGTTCTTGACCATCCAGTTCTGAATTTGTTCTATTACCTGCTTGTGGAGATTCTCCCTTCATCTCTTGTCCTGTACATTCTAAGGAGGATTCCTGCAAAGCTACGGCTATCCCAGTATCACCCCGTCAGCAGCAGCTAGAGACGAGGCATTACCATCTGCTGAGCCAAAAATGGTGACTGCTGTCAAGCTATGAAAAATCAACTGCAACGCCCTCTATATAATATTTGTATTGGTAGCCTCTCTG…
>Zm00001d039240
AGCAAACAAGAGCTAAGCTACTAGAGACATGGCCGACAACCTGATCAAGCCCGTGGCTTTGCTGCTGCTGCTCCTGAACCTGTGCATGTACGTCATCCTGGCCATCATCGGCGGCTGGGCTCTGAACGTGGCCATCGACCGCGGCTTCATCATCGGCCCGGAGCTGCGGCTTCCCGCGCATTTCCACCCTATCTTCTTCCCCATCGGCAACTTCGCCACCGGCTTCTTCGTCCTCTTCTCCCTCATAGCGGGCGTCGTCGGGATCGCCTCCGCCATGGTGGGCTTCAACCACCTCCGCTTCTGGAACTACGAAAGCCAGCAGCCCGCGGCGGCGTTGGGGATTGTGGCGTGGGCGCTCACAGTCCTAGCCATGGGCCTAGCTTGTCAGGAAATCTCTTT…
>Zm00001d039337
ATCTCTATGACACAGTGAGGGTTGATCCGGTCCACTCCCATCCCTAGTGGGCCGGATACGTTTCGAGGCTACAGAACTCCAACATGGATATTGTGATCGGTGCCTCGATGGGCTAAAAATCAGAACACATGGCATCCTGGCCCATTCACCAGTGCGCTTGGAGATAAGGCAGGCACGGCACAAGCTAGGCGCGCAAAGCCATTCGACACATGGGCGGCGCCGGCGAGCTAGACGCCTTCGACGCCGGCCGCTGCGCGGACGGGTACGCGCTGGGCCTCGCCGTGGGCCGTCGGTTCGCCGAGGTCATCCAGAGCAGGATGCGGCAGGACCTCGTGCTCCGGGAGCAGCTGCTGCCGTTCGCGTCGACGGCGCAGGCGCAGGCGCTCCTGGCCGCGCTCC…
>Zm00001d039377
ATGAGCATGAGCACGCCCAACTCGTGGCTCTTCGCCTCGGACAACTCGCGCTACAGCACCCGCGCGCGGCTGCTCTTCATGGGGCTCTCCTTCGCCATCGGCATCCTCACGTTCCTCCTCTACCTCGCCATCTGGTACATCTGCAGCAGCCGGCGCCGCCTGCTCCTCCGCGGCCGCGGCCGCGGCAGCCATCCGTCCGCGCCCGGGATCGGCGCGGCGGAAGAGGAGGGGGACCGCGGCATGAGCGCGGCCGCGATCGCCGCGCTGCCCACGTTCGCGCACGCCGGCGGGGCGGCGCTCGACTGCCCCGTGTGCCTCGCGCAGGTGGAGGCCGGCGAGAAGCTGCGGCGGCTGCCCAAGTGCGCGCACTCGTTCCACGCCGACTGCGTCGACGCCTGG…
>Zm00001d039451
ATCCAGTCCAGTATCCTCGACGGTCGACGCCGGCGCGAGCAGCAAATGGCCACCGCGGCGGTGACGATGACCATGGCGACGCACAACCCCCGCGCCCGCGCACCCCTCCGCGTCTGCGCCGCCTGGGACATGAACCCGGGAGCCGCCACCGTGGCCACGCCCAAGCCCTCCAAGGCCAAGGCCAAGCCGCCGCCGCCGCCCGCGACCACAACCCCGGCCCGCCCGCCTCCTCTGACCCACGCCGATCTCTTCGCGCGCTCCAGCGAGGCGCAAGGAGGGGTGAAGAAGAGCACATATATGGGCTTTGAGAAATGGTGGTTGCCACCTGCGCCAGTGGTGAAGAAACCCCGATCGCTCTACAGTGCGGTGTCACTGGCTTACTTGGGAGACTGCATATAT…
>Zm00001d039487
GACCACCGCATCACACAGCAGCAGCCTCTTGTGCTCCTCTCTGTCCTTTGCTTGCTCATCCCTCGACCTCGAGCGGCGGCGGCGGTCACTGCACTGCGTGTGCGTATCCATCCATCTTGCAGGCATCGTCGTCTGCACCGCGCGCTTGTGCGTGAGCCAAGGGCGGCAGAGGCGATGGGTGGCAAGCTGTTGCTGGGCGCGAGCCAGAGCCGCCACGCGCACGCGGTGGCGTCGCCTCCCCTGTCAAAGGTGGCCACTTCCGGCCTCCACGGCGAGGACTCGCCCTACTTCGCCGGGTGGAAAGCCTACGACGAGAACCCCTACGACGCCGTCTCCAACCCCGGCGGCGTCATTCAGATGGGCCTCGCCGAGAACCAGGTGTCCTTCGACCTCCTCGAG…
>Zm00001d039506
ATGGCCGTTCTCGTCTTCCTGGCGATCGCCCTGGTTAGCGCAGCAAGACGGAGAAACAAGAACCATCCCTCCCCCTACCGCTGCTACTCATGCACGCGCGCACTGCCTCCTGGTGCCGCCGCGTATGATCCAGACATGAATAGGGCGCACAGCAGCAGCTCCAAGCTCATCAACGAGAAGCTCGTGGAACACCGGATCTCCACTGCGAAGCACTGCCCCCACTGCGGCGAGAAAATCGACAGCAAACCGTTATGCACCTCCTCAGCCAGCATGAGACCTGGTGGTGGTGCAACTTGTTTTGATGGGATTAATTGCTGTAACTGCAAGAAGGATTGGGTGGGGCTGCCGGCAGGCGTCAAGTTCGATCCAACTGACCAGGAGCTGATCGAGCACCTCGAG…
>Zm00001d039531
ATGGCGGCCTCGCTAGGACTCGCCCACGAGACGAGCTACGCCGCCTACCACCCGCCGTCCGCGCCCGCCTCCTCGTACTTCCCACCACTACCACCACCCGACCTCCTCGTGGCGGACCTCCCGCCGCCCGCCGCCGCCACCATGGCCGATGACTACTTCCAGTTCGGATTCGACGGCCAGGAGATGGTGGGCGCTCCCGCTCCCGCCTGCGGCGGCTACGACTGCTCGGCGCCGGTGTTCGCCAACAGTTCTTCAGACGCCGCCGCCGCCGTCGGCAATGGCATGAGCCTGCTGAGCTATGGCGTCGACGGCGACGGCGACGGGAGGAGGCCGATGAGCGGACCACCATATGGCACCGGTGGGAACGGCGGCGGCCGGCCGCCGTCGTCGTCACGGATT…
>Zm00001d039682
GATAGTCTTGACCTCGGAGTCGGAGACAGCTCCACCTCCACCTCCATCATCCGACCATCCCCCACGCTACGCGGCTGTATTTATAGCGAGCGTCCTGAGGCCTCTGTTCCCCTGCTCGCTCCTGGGGAGGGAAGAAGAGGACAAGCAGGCACTACTACGCCAATGCGCGAGCGTGCCGACAGCTCCAGAGGAGGAAGAAGAGGTGGTGGGAGTGGGAGTGGGATACAGACAACGGGCGCCGACCGCGACGACGCCGCCGCCGCCGCTCCCTCCTCCTCGTGCTCCTGCTACGAAGCATTAACAATCCGAGGTCGTCGGTCCGTCCATGGCTGCCGCTCCTCCTCCTTGTAGCAGCTGCAGTTGCAGTTGCCGTATCCGCGGCAGGAAGCAGGCGCCCGC…
>Zm00001d039713
AGCTTGCTTGCTCTCTAACACGCACAGACACAGTCACACAGCGTTGCGCGCCAAGGAGAGAGCTTATTGCAAATTACTCTGTGGACCGAACCGGTCGGTCGGAATAATAAGCAGCAGAGAGAGAGAGATGGGGAAGCTGACGCTGGGGCACCGCGGCGAGGCGTCAGAGCCGGACTTCTTCAGGGGCGTCCTCGGCGAGCTCGTCCTCACCTTCCTCTTCGTCTTCATCGGCGTCGGAGCCGCCATGACCGACGGAGCGACGACGAAGGGTAGCACCGCTGGAGGCGATCTGACGGCGGTGGCGCTGGGGCAGGCGCTGGTGGTGGCGGTGATCGCGACGGCGGGGTTCCACATCTCCGGCGGCCACGTCAACCCGGCCGTGACGCTGTCGCTGGCCGT…
>Zm00001d039770
ATGCAGAGACTCGTGCGCGTCCTCGTGGTGCTGGGCGTGGCCGCCGCGGCGTCGGCGCAGGGCCCGACGGCGGCGCCAACGACGCCCACGCCGGCAACCCCCGCGGCGCCCGCGCCCGCGACGGCGTCCAGCAACATCACGGGCGTGCTGGCCAAGGCCGGGCAGTTCAACACCTTCATCCGGCTGCTCAAGTCCACGGGCGTGGCGTCGCAGATCGACAACCAGGTCGCCAACGGCGGGAACGGGGTCACGGTGTTCGCGCCCACGGACAACGCGTTCCAGTCGCTGCCCTCGGGCACGCTCAACTCGCTGTCGGACCAGGACAAGAACGCGCTGGTGCAGTACCACGTGGTGTCCACCGCCATCCCCATGTCGCAGTTCGACACCGTCAGCAACCCG…
>Zm00001d039786
GGCGGCCAGCGGAGGAGGGCACAGGCAGCAGCTAACATCCCTCACTCTCGGTACCTGACCTGACCACGAGAGCAACATGGGCGGAGGACACGACATGCACGGGCAGCACTACGGCCACAACGGCGGCGTGAAGGGCTTCGTGTCCAACCTCGTCCACGGCGGCGGCGGCCATGGCCATGGAAGCGGCTACGGCCATGGCCATGGAAACGGCTACGGCCATGGGAATGGCGGCTACGGCGGCGGCCACGGGTACCCTCCTCCCGCCGCCGCCGGCGCGTACCCTCATCCGCACGGCGCGTACCCTCACCCGCACGGCGGCCACGGGTACCCTCCTCCCGCCACCTACCCCGCGCACTCGGCGCACTACGGGCACACGGGGTCGTACCACACCAGCCACAA…
>Zm00001d039866
GCGACACCGACGCGCCCTCGCCACCCCGTCACCCGTTGCGCTGCCTCCCTCCCTAGTCCCTATCTCTCTCTGCCGTCTGCCCCGAAAGAGGCGGCAACCCCTCCGCGCGGGGTTCTTCTCTCGGTGCTCTGACAGGCGGCGCGGCAGCGAGACGTCGCTCTCTCTCTCACTCCCCGCATCCTCCTTTTCTTACCCGCGCCGGAGAGACCGATCGAGAGGCCGAGACCCCCCCCCCCCCCCCCCCCCCCCCCCACAACACTAAATGAGCTCGCCGACGCCATTACGTCCCGCCGGCGGCGGCAGTTACTACCCGCTCCACCGGCGGCGCGGGCGACCGGGCCCAGGCCCGGGCGCGGGTTTAAGAAGGCCGCGGGTGCGCCGGTGCAAGATGAAGCTGAT…
>Zm00001d040084
ACCTCGTCTGCCACCAACCCACCTCCTAGTTCCTGTTTCAGGACGCTTATTATTCTCCGCCGTTGGCGTCGTGAAGCCCGAAGACACCGATCTCACGGACAAACTTACAACATATGGCTATGGCGACGGCGAAGCTGAACTCCCCGGCTACCAGCTTGGTCGCTGGCGGCCGCACGCGCCGATCTGCGCCCGCCCGCTGCACGACGGTGATCCGCGCCGCCGCAGGCTCCTACTCGGACGAGCTCATCTCCACCGCGAAATCTGTTGCTTCCCCTGGGCGTGGTATTCTGGCAATTGATGAGTCAAATGCAACATGTGGAAAGAGGTTATCATCTATTGGTTTGGACAACACAGAAGTGAACCGCCAGGCTTACAGGCAGCTTTTGCTGACAACTGCTG…
>Zm00001d040147
GCCTCGCGCTCCTCCCTTCCTCGTAGGTTACCGTTGGTGCGAGTGCAACGCAACCCCACCCCAGCTGCTAAACCCGAGACCGAACCTCGTATCGTCCAGCTTAACCGCACCCACCTTTCGCGACTGGGATTTTTCTCGAGATCGATCGATCGCTTTCCATCAGAGAGCAGCATCACCTTCTTGCCTTGCCCACGCCCCAGTTGTGACTGCCTGCCGGTTGCGAATCGAAGCGTAAACATGACGACGCTGTCGTCCGGCGTCCTCCTGAAGCTCCTGGACGGCATGAAGAGCGGCGCCGCCAAGCCCGTGGGCGAGCACCGGACGGCGGTCCTGCAGGTGACGGACATCGTGCCAGCGGAGCTGGACGAGAAGGACCTCTTCCCCAAGCACGGCAAGTTC…
>Zm00001d040246
ATAAATGATAACATTGAATAATAATAAATAATAGCACGGAGTAAAAAGCAATTGTGTTGTGCTATGACACACGAGCACAACTGCACAAGTCACAAGATTCTTTGCCGGTCGCCCAACCCCAACCCCCGTCCCCGTCCTCCATTCGCAAAAGCTAGGCGATTACGCCATGCACGAGCCGACATGTCACATTAGTGTGCACCACGAGAATATGTTCTTCTCCATCGTCCATAGGCCAACCATGCGCCCACGGCTAGCTTAATTCGCCGCACCATCAGTTCGCTCGCAAACTCTCCTATCAAGCACAGGCACAGCACACAGCAGCACAGCCATGGCTGCTCCCAGACTCGCCGCCGCCAGCTGCCACGCTCTGCGCGGAGTGCTCCACGACAAGCTCCGCGC…
>Zm00001d040264
ATGCACGCCCAGGTGGCCGTGCTCCTCGCCGCCGGCGCCCCTCCGCCACCGTGGCCGCCTCACCCCTCGTGGCACCATCGCCAGATCCCTTGCCGTCGGCCTTTCAAGCCGCCCCACTCTCTGCGCGACGGCGGCGGCGGACAGCCGCCGCCCCCGGTCGTGGTCCCAGCTTCGAAGAGGCGCGCCTGGCCGGCCGTCTCGGCGGCGCTGTTCGGTGCAGGGTTCCTCCTGGGCCCGCTCCTCGACGGAATCCACTCCCGCGTCGGCCTCCAGGTGTACGGGAACGGCGCCCTCGAAGCCGGGGCCCTTCGCACCCACGTCCTGGTGCCGCCCCTGCTCGGCGCGTTCTACCTCACCGTCGGCCTGCTCCACCTGTTCCTGGACGAGAGGGCGCCCCCG…
>Zm00001d040266
CTCCGGCGCCGGATCGAGCGTCGTGGGTAAGTAACCTACTTCCCCCCTTTTCCCTTGCTGTGGATCTGCCTATCTGGTCCGTTCTTTGTTGTACCTTGCGCGGGTGCGTGTGCCCCGATCTGGCCCCTGTATTATCTGATTTGACTATGGCTGGAGATCAATATGTATGTGTTGTGCTTTTGTTCGGGCTGGGTTGGACAGATTATTCTTTTGTATATTGCGGCATGGATAACCAAGATTCTTACTGGGTTGGACTAATTGCTAGAGAATCGATCGGTTCTACATGCATGCAAGATTAATAGCCCTATGAATGCTTTATACTGGTTCAGAAATCAGAACTGGTGTTAATTTTGCTAGGAATATCGGATTGATTGGATTCTATTTTTCTTTAAGCTTTTT…
>Zm00001d040627
CACAAATAATTCTGGCGGATTCATACACAGCAAATAAATCAAAATGCAACGCTCCCCACAGAAACTAAGCAAAGAAATAGCGCCAACAAGTTAAATAATGCCCCCTTTGCACGTCCCCGGTAGTAGTACTCCTCGCAAGTTCTATCACCTGGTGCTGTTCCATGTGCACCCGTTCTGGATCCAAGTCCTGTACTTCCTTTTGATCTCCGTTTTGGGTTTCTTGATGCTGAGAGTCCTGCCCATGAAGTCCAGCTCCGTGCCTAGGCCCTCGGCTCTGGACCTACTCTTCACGTCGGTGTCGGCGACGACAGTCTCCAGCATGATCGCCGTCGAGATGGAATCCTTCTCTAACGCGCAGCTCCTCCTCATGACCCTCCTTATGCTCCTCGGGGGCGAGGT…
>Zm00001d040705
ATATAAACCGTGGTGTGTGTTGTCCACTACGATACAAAACACAAACTCTCGGAGACAGGGAAGTAGCGTAGCTAGATCCAGAGCTCGGCGCCAGAGATACCCGACATCCTCGTCATGTCTCCGGTTGCAAGCAAGGGAGTAGTGATGGACGGTGCGGTGGCGGTGGCGGCAGTGGCCGCCGCCGTGCTGCTGTGCCTCCATCTGCCGGCGGTGGCGCGAGGCCAGCTGCAGGTGGGGTTCTACAACACGAGCTGCCCCAACGCCGAGTCCCTGGTCCGCCAGGCGGTGGCCAGCGCGTTCGCCAACGACTCCGGCATCGCCGCCGGCCTCATCCGCCTCCTTTTCCACGACTGCTTCGTCAGGGGCTGCGATGCGTCGGTGCTGCTGACCTCCGCCAAC…
>Zm00001d040733
GCCACTTTGCTCAGCCACTACACGCCCGGCTACTTTATAAACACACATACACCGATCGATACACGACACACACGTACATACAGAACAGAGCGCACGCGCAGGCACAGCCCATCCAGCCAGCAGGGAGGGACACGGGCGGGCATGGCTGCTGGTGGCGCTGGTGCAGCTGTTGCGGCGGTGCTCACGACGGCCGTCGCTGCAGTCCTCGTTGCGGTGTTGACGACGACGGTGTCCGGACAGGACGACCCAGCGCCAGAGCCAGCGCCGGCGGCGGCGTGCGCGCGGCGGCCCGTGGTGTTCGCGTTCGGGGACTCCAACACGGACACGGGCGGCGTGGCGGCTGGGCTGGGGCACTACTACCCGCTCCCCGAGGGCCGCGTCTTCTTCCGCCGATCCACC…
>Zm00001d041067
ATTGCAAGAGTTTGAGACAGCAGAGGACACTCCTCCTCAGAACTCTCCCTTCCCTCTTGTAGGGGCCAAAAGGGTCAGAGATCTAGGAAGAAGAGAACTAGTCCCCAAGCCTAACAAGAAAGCAAGCTCTTCTGCAACTGTTGGCATTCGCCTTAATTTGTATCCATATCCCAATGGCAGGCCTATCTCTGCAACACCCCTGGGCATTCACTTTCGGCCTCCTAGGCAACGTCATCTCCTTCATGACCTTCCTGGCCCCGATACCGACGTTCTACCGCATCTACAAGAGCAAGTCGACGGAGGGCTTCCAGTCGGTTCCGTACGTGGTGGCCCTGTTCAGCGCCATGCTGTGGATCTTCTACGCGCTGATCAAGTCCAACGAGACGTTCCTCATCACCA…
>Zm00001d041082
CACAAATTAAACAGAGAGCCTCCTCCCAGGAGCAGGAGAAGCTATGACGCCGTTGAGGTACGCCGCCTCACCTCACCTGCAGCCGCCCTTCCTGGGCTACAAATCCTCCAACGTTGATGGCCGATCAAGAACGCGGCAGCAGGCCATGATCGCCGAGCGCAGCAGCAGCAGCAGCACAAGTGGGCGAGGAGGACAGCTGGAGGACAGGATCAGGGAGCAGCTCCTCAACGCCGAGCTCTCGCCGTCGTCGTACGACACGGCCTGGGCCGCCATGGTTCCGGCGCCGGGGTCCCTTGCGGCGTCGCGGTACCCGCAGTGCGTGGATTGGATCTTGCGGAACCAGCGCAGCGACGGGTCGTGGGGGTTGGACCCTTCGCTGCGCAAGGACGCGCTCTCGTC…
>Zm00001d041229
AAACTACACCACGCATACCACCTGATGGCATCAATCAAACATATACAGACACTTAGTCAACATATACGATCAGCCAGGCTACCCACAACCAAACACACGCAAACTGATTATTACCAAGAGATTTGAACAGGCACCATAAGGAATTCGTTTGCTTTTACTTAATTATATGCTTTAATGAATCCACACCTTTATTTGCTATATAATTAGTTTATTACCAAATTGTTGCAGTAGAAACAAGATTACATGTATAAAAAAAAACAGACTCCCTTCGCTGTCTCGTCTTCCCTGGGCTCTCTCTCTCCCTGCAAAAGGGCCAAGGCAAGGATTCTCGTTCTCCTCCAGGTTGGTTTGGATTCCTGTTCTGTTCGCACCGCCTCCGCCTCCCTCCCTCCCTCTCCC…
>Zm00001d041298
ATTACATTGCCGATCACTTGCCTGACAGGGGTAGCAGCCTCTTCGCGGTGGCTGGGGATGGCGGGCGGCAGGCGGAGGGCGGCGGCGAGGGCTAGCTCCGGTGGTCGCCGGCCACGCGAATCATCTCTTTCTCTGTGAATGTGGCGTCCGCTTCGAACTACATCGTCCGTTGGCCATCTGCACCTCCTTCCCGGTGAACCCTACAAGCCCCTAACCTCCCAGTGAAAGGAAACAAAGCAGGAATTGTGTATTTGTGTGCAGTTGGTTTCATTGGTTATACTCAAACGAGGACCTAGTCTTAGCTGAATACTGCATGCCTTCCTTGCAGAAGCAGCAAAAAGAACAACTCCTTTTGGTTATTCCTAACTTTAAGAGGGAAAAACTCAGCTGGCCTGCAGG…
>Zm00001d041308
CCCGCCCAGCGCCGGGGACAGCGAGAGGCGGACGAAGCCCCGCGCGGCGCTCCGGTCGCCTCAACATCTTATCCATCCACCCAGCTCTCCTCCGACTTCGCCAAGCCCCGCAGCCAGATAAAAAGTACGGCCTCCCCTCCGGCGCGCGAACGCGACACGGCGCAGTGTCTCCTCGCCCTCCGGTGGTCCTCGTGCGCGCGCACCGACACGTCCCGGCGAACCGCTCCGTTGTCCGTTCCGGTAGTTTCGGTACGCGCGCCGCTCGCCTTGGCGCCATGGCGTCGGCTGCCGCTTCGGCGGCGGCGGCGCTGGCGCGGCACGTCCTCCTCCCCCCGCGCTACCACGCGTCGCCGCCCTCCGCCGCTCGCCGGGCCCGCGCCGCGCCCGCGCTCACCTCGG…
>Zm00001d041389
GCCGCCGCCCGCTCACCCTCATCCCCTAGGCCTCCACTTCTCTGATTGGGGCGACTTCATGGCGAGCGGGCACAAATCCGACATGGGCGCCTCTGCTCCGACGACCGCTCTCTCCTCTGCGCCTCCACTGCCCCTCTCCCTGTTAGGCGGCGACAGCAAGGAGGAGGAGGAGGAAGGGTTGGCTGGGCCACCGTCGGCACCACGCGAGGCACGAGCGCAACCGCGCCTATGAGTTCCATAGCTCCGAGCCGTCGACGCTAGGCGGCAGTGCCCTCGTCTGGACCTGCCCGCGCCCAGGCGGAGCCGCCGCCGACCCGAGATCTGCCTAGGTCGCCCGCCTGCTCTGGATGACCAAGGTCACCTCCGCGGACGCTGAGCAGCTGAGCTCCTCCCGCGAAG…
>Zm00001d041430
ATGGACCTGCTGAACCCCGAGCAGATCTCCGAGTTCCGGGAGGCGTTCGCGTTCTTCGACAAGGACGGCGACGGGTGCATCACGGTGGAGGAGCTGGCGACGGTGATGGGGTCGCTGCAGGGGCAGCGGCCCAGCGCGGAGGAGCTGCGCGAGATGATCCGCGACGCCGACGCCGACGGCAACGGCGCCATCGACTTCGCCGAGTTCCTGGGCCTCATGGCACGCAAGACCGCGGGGGGCGGCGCCGGCGGCGGCGCCGACCCCGACGAGGAGCTGCGCGAGGCGTTCAAGGTGTTCGACAAGGACCAGAACGGGTACATCTCCGCCACCGAGCTCCGCCACGTCATGATCAACCTCGGCGAGAAGCTCACGGACGAGGAGGTGGAGCAGATGATCCGC…
>Zm00001d041453
CCCACGCGGTTTTTGTGTTTGCTGCCGCCGCGGTTTCCATTGCTTCTCCCGTCGCTAGGGCGCTCGTGAATACGTGATCCATCGTCTCCATCTCCGTCTGGTGTGGTGAGGTTTGAGAGACTCGAGGTGTGAGCGTCGCTTCGTCTGGAATCGGCTCTCTCATTTGTTAGATAGATCCTTCTATCTCCCCACGTTTGGGCGTCGCTTCGTCGGCTGCGACTTGCGAGACGCCGGCGCCGCCGGCGCCGGTGGACGAAGGCGATCAAGGATTAGGCGATCCGATCCGATCCGAACCAATTCTCCATTCTTCGATTCCTTCCTTGGGTGGGCGGCTGCCCTCAGATTCCTTCCACATGGCTCGTTCCCCGCCGCCGCCACCCCCTTCCCCGGCGCAAGGGA…
>Zm00001d041663
AAATTGGCGAGAGGAGCGAGAGAGAACCCAAACGGAGAGAGACAATCGAGAGAGATGGCAAACTGTTTTGGTGACGTCGTGGACAATTACAAGCTAGACACAATGCCAAGATATATCGGCAAAAAGAAGACTCGAGAAGACCGGGCACGAGAGGCCTCCTATCTCAGTAATGAGAATGAGAAGTACAAGAAAGCTAAAGACTATGTGAACATGCTGAAGGACTGGTACGGCAATGGAGCGTCGAAGCTGTGCGTGATCTACAACCAGACGGGCGGAACCCTGCGGTACGTCGACGACAAGGACTGGCTGGGCTACCCGGGGCCGACGCCCTACCCGACGGAGATCGGCAACGGGCAGTGGGCGTCCTTCCTCCACGTCCACAAGACCGGCGCCTCGTCG…
>Zm00001d041712
TCCTCACTCACACTCCATCCTTTACTTCTCTCTTTTCTTTTCATTCTTCCGATCCCTTAATCCCATATATATATGCATCGTCTTTTATCTGGGGCAGCGGCGTCGTCTGCATCTTGCACCAAGCAAGTGCACTGCAGTTCTCTGCAGCATGCTGCCGTATTATGGTGGCTATTATTGGTCAGAGTACGTTGAACAGTATCACAGAGCACGCCGGCTAGAGAACGAGAAGCGGCGGCTGGAGAACGAGAAGCGTGCGCTGGAGAGGCAACTAGCGGAGAAGACGAGGGACGCTCAGGTGTCCTCCACCCAGGTCTTCACGCTGCAGCACAAGGTGCGAGAGCTGGAGCAGAGGAACACCGGACTGTCCGGGGACCTGGCGAAGCAAAGGGAGGACACGAG…
>Zm00001d041730
AGGGGACGTTGCTGGAGACAACCTTAACGCACTGCTAAAAGAGCTCGACGACTACGTTGTATGCTGATCGATTCGTCTCCGATCTCCTCCTTCGACCGCCGCCACCTTCGTCTCCGAGACTCCGACGATGTCCTCCGCCGCCGATGAGGATGCGTTGTCGTCTGACAAGGGGAAGAAGAGGGAGGAGGACGGCACTGACGGGAGGAGCCAACGTCAGGAGGGTGTCGAGGTGGCCGACGGGAAAGTGGATCTAGGAGACCTGTACGGCGCGGCGGCGGGGTGGGTAGAGGCGCGGACCAGCTGCCCGCACATCGGCACCATGCCACCCGCTGGTGCTGACGACCTCGCGCGCGTGCCTTCGCCCGACTCTCCGTGCTCCAGATGTAATCACCCTGCTGA…
>Zm00001d041814
GAAATTCTTGATGGCGTTACAGACATTGATATGGTGGTTAATCTGAAACTAAGAGAAGATGTTCTAGTAGAGAAGTGCCTTGGCAGAAGGATTTGTGGCCAATGTGGAAAGAACTTCAATTTGGCCTGCATTGATGTTAAGGGTGAAAATGGACTCCCACCAATCTACATGGCACCACTGTTGCCCCCAAACAACTGCATGTCGAAGCTTATTACCCGAGCTGATGATACCGAAGAGGTGGTCAGAAATCGGCTTCAGATATATAATGACATGAGTCAACCTGTGGAAGGTTTCTACCGAGAGCAGGGGAAGCTCTTGGAATTTGACTTGCCTGGTGGGATCCCTGAATCTTGGCCAAAGCTGCTCCAGGTTCTAAACCTCGAGGACCAAGAGGAGTTG…
>Zm00001d041824
CACCCATGTCTTGTGGTCGAAAACTGCCTCCGCAGCATGGATCCAGCAAACGAACAGAAGAGAAGTCTCCAGCAGGCAGCAGCCCATCGTCCCACACCAAGAACAACCAGAGAGGCAAGCAGGGGAGAATCGCGGAGGTCTGGGAAACACCATCCTGCAGAGATGACAGTGCTGCTCTCCCCGAGCTCCTCCCTGTTCCTCGCCAAACCTTCTGCCGTCGCCAAGGGCAGGGCGGCGGCTGTGACGTGCTTCAGCGGGCCCTCCCTGTCAGTGGGGCGTGAAGATCAGGAGGGTGTAGCAGTGGTGGTGGGGAGGCGTGCGTTGGCTTCCGCAGCAGCTGTCGCCTCAGTGCTTGGGTTTGCAGGCCGTGGTCTGGCGGCCAACCAGGGCCTGCTCGCC…
>Zm00001d041886
ATGGTCGCAGACGTGGCGAAGCTGAGCACGAACGAGTGGTACTTCTTCAGCTTCCGCGACCGCAAGTACGCCACGGGGCTGCGCACCAACCGCGCCACCAAGTCTGGCTACTGGAAGGCCACCGGCAAGGACCGCGTGATCCACACCCCCTGCAGCTGGCCCGCCGCTGCCGCCGGCCACCACTGCACCGTCGTCGGCATGCGCAAGACCCTCGTCTTCTACCGCGGACGCACCCCAAACGGCGTCAAGACCAGCTGGGTGATGCACGAGTTCCGGATGGAGAACCCGCACACCCCACCCAAGGAGGACTGGGTCCTGTGCAGGGTCTTCTACAAGAAGAAGGCAGACGCCATGGACTATGCCGACTGCAGTGACCAGGACGCCATCGCCGTGCATATG…
>Zm00001d042008
ATGGCGTTAGCCTATGCAGCAGCCAGGCTAGTCCACCCATGCATTAGCATGGGCATGGTGTCCAAGCAGCACCCAAGAACACCGCCGCCGTCCTCCTGCTGCCTACACCTCCACCACATCTTCTACCTTAGGCCCGTCGCCAGCAGCCACCACTTGGCGCGCCACTCCGTCGACGTCACCAAGGACGACAAGCCGCTTGAGCCGCCGGCGCCGGCGCCGGCTGCAGAGACAGAGAGGGAGAGCACGCATCAGCAGGAGGACGAGGACGGCGGGCCAAAGCTGGACCCGAGGCGGTTCGAGGAGAAGTTCGCGGTGCTGAACACGGGGGTCCACGAGTGCCGGTCCTGCGGGTACCGCTACGACCAGACGGCGGGGGACCCGTCGTACCCGGTGCCGCCG…
>Zm00001d042044
ATGGCGGCACCCTCCCACGTCCTCCCGTTCCTGTCCCCCGCCGGCGGGTGTGCCGCCTCCTCCGCCCGCGCCCACTCTGGCTACCGCGCTGGTCTCCTGCGCTGCTCGGCCGCGGCCGGCCAGGCGGGCTTCTTCACTCGCCTCGGTCGCCTCATAAAGGAGAAGGCCAAGAGCGACGTGGAGAAGCTCTTCTCCGGCTTCTCCAAGACCCGCGAGAACCTCTCTGTCGTCGACGAGCTCCTTACTTACTGGAACCTTGCCGACACCGACCGCGTCCTCGACGACCTCGAGGAGGTGCTCCTACCCACTACTGCCTCAGTTCTCCCTCTGACCCTCTCTGCTGCCTGCCCCATCTGTTCGGTTCTGATGATGCTCCTTGCCGATGCACACCCCGTCACA…
>Zm00001d042098
CAGCAAGCAGGCAGAGCCCAGAACCAGGCAGCTAGCAGAAACATGTCTCCGCCTGTTAAGATCATCGGCCATTTCACCAGCCCATTCTCGCACCGCGTCGAGGCCGCTCTGCGGCTCAAGGGCGTGCCGTACGAGCTGGTCCAGGAAGACCTGAGCAACAAGAGCGAGCTGCTGCTCGCCAAAAACCCTGTCCACAAGAAGGTGCCCGTGCTCCTCCATGGCGATCGCGCCATCTGCGAGTCCCTCGCCATCGTCCAGTACGTCGACGAGGCCTTCGACGGGCCGCCTCTCCTCCCCGCCGACCCTCATGACCGTGCCGTGGCCCGTTTCTGGGCAGACTTCATGGACAAGCTCGTCGTGCCGTTCTGGATGGCACACTGGGCCGAGGGCGAGGCGCAG…
>Zm00001d042144
ACCACCGCCACCGGATAAGGCTGCCCCGACCGCTGGGAGCCTGCGATTCCGGAGGCTTCGAGGAGCAGGCCATGGCGCGGGGCGGCCACCTCAGTGCGCTCTGCCTGCCACCTCGCCTCGGCGCCACGCCGCCGTGCTGCGGCCGCCCTGCCGCCGTCCGAGCCAGCAGCTGCTGCGCCAGGCCGCTGCCACCAGGCGGCGCGCGGCGGCGGGGTCGGGGCCGGGGCCGCCTCTTGGTGGTGCGCGCCGGCGGGCCGCCCAGCACCAACGCGCTCATCCTCGCCTTCGTGCTCCCGCTCTCCCTCTTCGTCGGCACGCTCGTCACCGCCGCTCGCGTCGCCGACGACCTCGACGACCGATTCCTAAGGGAGATGGAGATAAACCGGGCGATACTGGAAG…
>Zm00001d042225
ACTAAACTAGTGCGGGGTATAAAGCTCTCTCCCTCCGCGCTTCCGATCAGTTCACGACGACTCCAGGTCCAGGAGGGGCGCACTTGACTTTCCCCTCCTCCTCCTGCGAGCACCTTCCTCGCCTCGCTCTCATGGCCTCATCAGAGCCTATAGAGTGCCAGAGCGCGCAATTGGTCTTCTTCTTCAGCTTCGATCCGTCTGTGACTGTGTGTCCTGTTTTAATTCAGGTTGTGGCGCTGAGGGTGTCGATTCACTGCCAAGGATGCAAGAAGAAGGTGAAGAAGGTGCTCCAGAACATCAGCGGCGTGTACCGATGCGAAATCGATGCCCGGAGCAACAAGGTCGTGGCGACGGTCTCGACGGAGCTCGACCCCTACATGCTGGTCGCCAAGCTGCGCA…
>Zm00001d042260
GATTCATCAATGCTAGTTCTATTAGCTACTACTAGGCGTTGGGCACTGTACTGTACTGCTGCCTCCAATTATTACTAGAGTACTCCCGGTGCCATCTCCTCCATCTCCCTATTCCTCAGCTCCTGGACCGGCCATGGCCGCACCTTCCGGCACGATGCGCGCCGTGCAGTACGACAGATACGGCGGAGGAGCACGGGGGCTCAAGCATGTGGAGGTGCCGATCCCGTCGCCGAAGAAAGGCGAGGTGCTCATCAGGATGGAGGCCACCAGCATCAACGTCGTCGACTGGAAGTTCCAGAACGGCTTCGCGCGGCCCTTCATGCCCAGGAGGTTCCCTTTCATCTCTGGTACTGTAACAGCACGCAGAGCAGAGCCATGGCTGCGCGTGAGGACGGGAGA…
>Zm00001d042293
GGCGCCCATCGCATACCCGTGACCGCAGCCACCACACCCATTTTGTCTTGTCGGCATACGCCGCCGTCTCCTTCAACATGGAATTCGTGATGCGCGACGACGAGAGCGCCACGTTCAACGTCGAGGAGGAGCGGATCGATAGTCTGAGTCCATGCCGCCGGCATCGCTGCTTCGTCCAGCCACCAGATCTCGCGCGCTGATGCTGGACTACGGAAGCAGAAGGGCACTTCAGCGCCGGTGTACGCGGCCGGTGCCAGCACCGCGTCCGCGTTAGTGGCTACTTCAGCGCCGGTGGACGCGGCTGGTGCCCGCACCGCGTTAGTGGCGAGGCAGCAGCGAGCAGCCAACGGGACGGGAGAGCCGGTTCCTAGTAAGTGCCTAGCTGTTTTTGGAAATCCG…
>Zm00001d042345
ATCCATATCGACGACGACGATCTAGCTAGCCTGCTTGAGATCTCCATTTTTACCCACGCGCGATCGCGATCGCACTGTTCTTCTTCTTCCTCGCTCCTACGTGCACGATCGACTAGCGGCATATATATACTGCTGCTAGCTAACCGTACGCGCAGGTATAGCGGCCGCAGCTGCGCACGAGTTCATTCCTCACCTAGCTAGCCTGGTGAAACAAAAGCTAGCAGCTAGCTAGCAAGAGAGATCATATATATCGATCAAGCTATCAGAAGAGGCGATCGACGAGCTAGGACGATGATCGGGTGGGGCGACGTGTACAAGGTGGTGGCGGCGACGGTGCCGCTCTACTTCGCGCTGTTCCTGGGCTACGGCTCGGTGCGGTGGTGGCGCATCTTCACGCGG…
>Zm00001d042420
ATGCACTCGCTTGTGAGGCGTGGCAATGGCTACGGCTACGGCTATGGTGGTTACGGCAGCAGCAATCCCCATATGAACTACCACCGCCAAAACACCGAGTCCGTGACCACCGTCGTCACGGAGATGAACCGAATGGCCGTCGACGACAAGCCCTGCTACGGCGGCGGCGTGCAGAAGCAGGCCTGCAAGGTGGAGGCGTTCCAGGAGCACGACGAAGCGTACAAGGGCGCCGTGGCCGTGCAGCAGAAGCACTCCTCCTTCAAGGAGGACAAGGAGGAGGTGCGCGGTGCTGCTGCCGCCGTCAGAAGCTGGCACGACGAGTTATACAAGGAGGAGGAGGAGGAGAAGCGCGTCGTCGACACGGAGTACGGTGCCCGCTACGGGGGTGTGGCCGCCGTG…
>Zm00001d042463
CCCCGCTTGCGGCCTTTTTAACCGCTTTTTAAAGCTCCCCCGCCTCTCCCACACTCCCCACTTCACCTTCGCCCTCCCCCGCCTGCGAGCGCGAGGCGCGGAGGGGCTAGCGCGCTAGCGGCGCCATGGCCCTGACCGACGCCACCGCGTTCCCCTACGGCCTGCGGGTCCTCGTCGTCGACGACGACCCCACCTGGCTCAAGATCCTCGAGAAGATGCTCCGCAAGTGTTCATACGAAGTCACCACATGCGGTTTAGCCAGTGTTGCTATCCAAATTCTCCGGGAGAGGAGAAACAAGTTTGACATTGTAATCAGTGATGTCAACATGCCTGACATGGATGGTTTCAAGCTTCTCGAACTCATTGGGCTTGAGATGGATCTACCTGTTATAAGTCAGT…
>Zm00001d042481
AGGCCTCCACGGCTCCACCTCCACTGTCTCCACTCAACCGAGCGAGCGGTAGAAAAAAGTTCGGAAGAGCGAAAGAGGCCGCGGAAAAGGCGTGCAAGCGGCCGCGAGGGAATCCAATTCCAATTCCAATTCCAGCCTCACGTCCTCCCCTCCCCTCTGCCCTGCCCTGCCCTGCCCCGCTTTGTTTTACATTCCATTCCATCCCATCCCATTTTGCAGCTCCTCCTTCCGTGCTCGCTGCGCCCTCCTGCTTCCACCCCCGGCAGCGGCAGGGGCAGGAGGAGACGACGGTCGCCACCGGCGCCCTGCACCGGCGGATGTCGGATCGGGAGCTCCGCCCCCTGCGCTCCATCAGAATCACAGGGGACGGTCGATGCCTGTTCAGGTCCGTCGCCTACG…
>Zm00001d042514
ATGACTTTAGCAAAGGCGTATGTCATCCTTGCAAAAGAACATGATAATCTTCAGCTTGCATGGGAGCTTAGTTCGCAGATAAGGAATTGTCAAAGATTGCTCTCTGAAGGGGTAGTTAGTGGGAGAGCAATCACTAAAGATGAAGCCCATCCTATAATAAGCCGGCTAGCATTGTTAATATACAAGGCTCAGGACTCTCACTATGATCTCAGCACAACAATAGTGACATTGAAGAACCATGCCCTGGCACTAGAGGAGCGTGCAAAGGCAGCAATTGTTCAGAGTGCTGAGTTTGGCCAGTTAGCAGCAGAATCCTTCCCGAAGAATCTGCACTGTCTAACTGTGAAACTGACCGAGGAGTGGCTTCGGAACCCTAAGCATAGGAGTCGCTCAGAGGAG…
>Zm00001d042600
TTCGGCAAGATTGCAACAGGGTCGTCCGGTCGCGTTTCTCCTACGCGGTCCGTGGGCTGTGCCTGCCTGCCTGCTGTTGCCTCGTCTCCTCGTTTAAACGGGCGAACTCAAGATTGCAACAGGGTCGTCCGCCGCCACCAATTGCTAGCGCAATCCTAGCCCTAGCCCAGCGCCCCCTCCGGCCCTCCCTGCTTCGTGCTTGGTAGCGATGGCGTCGTTTTCTGAAGCGCCCCCGGGGAACCCAACTGCTGGCGAGAAGATCTTCAAGACCAAGTGCGCGCAGTGCCACACCGTCGACAAGGGCGCCGGCCACAAGCAAGGTCCTAATTTGAATGGTCTGTTTGGGAGGCAGTCTGGTACAACACCTGGCTACTCTTACTCTTCGGCTAACAAGAACAT…
>Zm00001d042684
ACACCTGACAACACACACACACACACACGTAGCTGTGGCGCAGGGGGGCGCGGCAATGGACGCAAACACTCTCCTCCTGCCCTGCTCCGACGGCGCCGTCGCCGGCGCGGTGGACTTCCGCGGGCGCCCCGCGTCCCGGTCCGGCACCGGCCGATGGTCCGCCGCGATGTTCGTCCTCGGGGTGGAGATAGCGGAGAGGTTCGCGTACCACGGGGTGTCGGCGAACCTGATCAGCTACCTGACGGGGCCGCTCGGGGAATCCACCGCGGGCGCGGCGGCTGCGATCAACGCGTGGAGCGGGGTGGCGACCATGCTGCCGCTGCTGATGGCGTGTGTGGCCGACGCCTGGCTCGGGCGGTACCGCACCATCGTCCTCGCCTCCCTCCTCTTCGTCGTGGT…
>Zm00001d042692
GAGTTGCGTCCGCCCCTTGCCCCCTCCCTCTCCGTGTCTCCGATTCTGGATCTGCCCATGCCGTAACCCGCAGGCTCCCGGCATCTCGCTCTTGCCTCCAAAATTCACCTTCGCCGATTGCCGTCGTGGGCCGCCGCGATGGCGTTGCGGACGCCTCGTACCACCTCCGTCGCATTCTCCGCTGACTCCCCCCTCGGCGGCGTCCCAATACGCTCCTCAACAGCCTGCTCCGTTCCCACGCCACCTCCTCTCGCTCCGCTGCGACCACCGAGGACCACCAGAGCGGGACGCCGCGGAACTCGTCGGCCACGTCCTGGCCGTCGCGCATGCTGACGACGAGGCTGTTGCCCTCCCGGGCGCCCTCGGCGCGGAGCTCGCACGCGTCCTGCGAGCGCGCGG…
>Zm00001d042740
ATGGACGCCAGAAGCAGCATGCACGTTGTGATGCTGCCATGGCTGGCTTTCGGCCACATCCTCCCGTTCACCGAGCTCGCCAAGCGCATAGCCCGGCAGGGCCACCGAGTCACACTCTTCTCCACGCCAAGAAACACCAGGCGGTTAATCCGCATCCCTCCAGAACTCGCGGAGCATATCCGCGTCGTGGACATCGCCCTGCCGCGCGTGGAGCGCCTGCCGGAGGACGCCGAGGCGAGCATAGACCTCCCATCCGACGACCTCCGACCGCACCTCCACGTAGCCTACGACGCTGCCTTCGCCGGCAAGCTGTCGGAAATCCTGCAGGAGCCGTATCCAGGGAAGCCGGACTGGGTGGTCATCGACTACGCCGCGCACTGGGCGCCGGCGGCCGCGGCG…
>Zm00001d042749
ATGGCAGCCTACGAGAAGCAGCAGCGGCCGGAGACGCCGCTGAACGCCGCGTACTACGGCCAGCCGATCCCTCCGCCGCAGCCGCCCGCGTACTACCCGCCACCGCCGCCGCCGCCACCCGTCCCACGCCGCGGCGGCCGCTCACGCTGCCTGCTCGGCTCCGTCGTGGCCCTCGTCGTCGCGCTCGGCGTCGCCACCCTGGTGCTCTGGCTCATCTTCCGCCCGGACAACCTCAGGGCCTACGCCGACTCCGCCGCGCTCTCCCGCTTCGACCTCGGCAGCGGCGGGGACCTCCTCCAGTACAACCTCACCGTGGACATCCGCGTGCGCAACCCCAACCGCTTCGGGATCCGCTACGACTACGCCGAGGCGCAGGCGTTCTACGACGGCGACCGCTTC…
>Zm00001d042750
ATGGCCAGTCACGAGCACAAGATCGACCAGCCCTACTACGGGCGCCCGCCCATCCCTCCCGAAGCACCGGCCGCCGGCGTCCGCCCGCTGGCGCGCCGGGACGCGTCGTACGCGCTCCTCTGCCACGCCTTCCGCGCGCTGACGCTGGCGCTCATCGCCGTCGGCGTCGTGGCGCTGGTGCTCTGGCTCGTCTACCAGCCCAGCAGCCTCAAGGCGTACGTCGACTCGGCGCAGCTCACCCGCTTCGACCTCGACAACAGCGGCACCCAGACCCACCAGCTGCGCTACAACCTCACCGTGGGCGTCAGCATCCGCAACCCGAACCGGAAGCAGGCCGTGCTGTATAGGCGCCTGGACGCCGTGGCGCTCTACGGCGGCGAGCGGCTCGGGTACGTGGAC…
>Zm00001d042829
AAAAGTGCCATGCGTGTGACAGTTTTATCACACTCACCGCATTTACTCTTTTTCACCAGGGAGAAAGAATTGGCTGTTGTGAAGATCAACCCTGCGGATGTCGAAATTATCGCTAGTGAGCTTAAGCTGGACAAGAAGATCGCGAAGAGAACGCTCTGTGAGCACAAGGGTGATGCCGTGGCTGCGGTCTCATTTATAGATTCTTGGGTATTATCATTGAGTCCTATGAGACGAGCATTTCTCAAGGCGATGAGGAAATCTAACAATCATTAATTAAGGTAGGTGTACTCTTGAACTACAGATACATATATCTGGTTGATGGCCTGGGAAGAATAAGATGGCAAGGCTCTGGATCTACAACACAAGAAGAATTGTCGTCACTAATAGCGTGTACCTCCA…
>Zm00001d042867
GCGTGCAAGCACCGCAGAAACAAACAAAAAAACACCCGGGAAATCCAAGCAGCTGTTGCAACCGGTTCCTTCGAGGAGAACGTGAGAAAGAAGCATGAGGCCCCAGGTGCTGCTCGTCGCACTGGCCGTCTTCGCCGTCCTCGTAGCTCTGCCACTGGGCAAAGCGCACGAGGAGGAGGAGGAGGAAGGGCTTGAACTCGAAGCCAGCAGGAGGCGGTGGCCGTGCTGCGACCAGTGCGGCATTTGCACCAGGTCGCAGCCGCCGATATGCGAGTGCAGGGACACGTCGACGACCGGCTGCCACCCGGCTTGCAAGGCGTGCGCCCTGTCCATCTCCGACGGCCTCTTCGTGTGCAAGGACAAGATCGTCAACTTCTGCAAGCGCCGCTGCACCCGTCG…
>Zm00001d042880
AGAGGCGTCGCAATAGTGCGGGCAGATGCTGGATGGGCTCACTGTGTTGCAATAACAGATGAAGGTGATGTTTATACATGGGGTTGGAAAGAGTGTGTTCCAACTGGAAGGGTTATTGGAGACCAATCTTCAGTTGGAACCAAGGAGAAGGATGAAAGACAAATGGCAATGGCCACTGACCAAGATATAACAAAGGCAACTCCATTACAGTGAGCCCCAGGTCGCAGGTGTCTAGGACAAGCAGCGGGGCAGCATCTGGTCCTTCTGAAAGCAGAGGCACTGATGATAGCACAAAGCGACGAAGGTTGTCTTCAGCAAAACATGGCCCTGAGAGCTCGACATCCAGTGACGAAAGTCTTTCCGCACCCCCTTGTGTTGTGACATTTAATACAGGAGTGA…
>Zm00001d042888
TTGGGATGAAAGTAATAACTTGTTTTTAAGGAACCAAGGCCACAAAAATAAACATTAAGAGGGAGATCACCACGATTAGGGCCAGTTGCCCAGAAGCACGCGCCCAGCATTGAATCTGGGGTTCCTGATTGCAGGAGGTATGTGCATTGTTGTATCTGATGAAACCATATTTTCAGCCTCCCATTGCTCTTAATATTCTAACAAGCAGAATTCTTATTTTATGGCAGTCCTAATGGTGCATACAGTACAGGTTTTAAACCACTTTCTCATCAGGTTTCCCCAGCATTGCTTGTCAAATGGTGTCTCTTGCTGTTTTTTATACACATTTCTTTCATTATGGTGCTATTTTTTAAAAGGGACGCTGGCATCTTTTACAAAAAATTCAAATTTGTATCCTAA…
>Zm00001d042909
CAGCCATCTTCGTTAGTTACATAGAGCCGCGCCGCCGCAAGAGAGGAGAGAGCGCCTCCAACGCCACCTGGAGGAGAGGACAGCGCGCCAGGGAGGGGGAGGAGGAAGAAGAACATGGGGAAGGGCGTCCTGGAGGTGCACCTCGTCGACGCCAAGGGGCTCTCCGGCAACGATTTCTTAGGGAAGCTGGACCCCTACGTGATCATGCAGTACCGGAGCCAGGAGCGCAAGAGCAGCGTCGCCCGAGACCAAGGAAGGAACCCGTGCTGGAACGAGGTGTTCAAGTTCCAGATCAACTCGGCCGCGGCCAACGTGCAGCACAAGCTCATCCTCCGGATCATGGACCACGACAACTTCTCCAGCGACGACTTCCTCGGCGAGGCGACGATCGACGTGACG…
>Zm00001d042972
GGTGGAGGAGGAGAATAGTATTATGCTAAGCTAATGCCGCGGCCCCTTTCGTCGGCTCCAGTCCCGGCTCGGCGTTGCTCCTCCCCTCCATTCCCTGTCGGCCTCTTGCGCTTTCCGGCCTCGGATTCTTTGTCGTGTGCGCCCCCTCCGTTGCATCTCGCTGCTTCTCCTTCTTCTTCGCTTTGCATCTGAGTTGAGCTGGAGCATCGATCCCGTCCGCCTCGTCCTCCCCGACGCGGCTTCGGCTGGACTCCACCGCGCTCTTTAGTTCGGTTTCCCCGTCAGAGCTTCCAACCTGTTCTACTCGGTTTAGATTTTGGAGCTAGAGTTTCCAAAGCAAAAGCTTTCCTTTTTTTTCCCTCCCTCCCCTTTGCATTTGGCATGAGGGGAAACGCTGCG…
>Zm00001d042974
GAAGCACACCCAGAATCGAACAAAAGAGTTCCTGTGATAGTTGATACTCTTGAGAAATTGGAGCTTAGTCCCAAGGTTCTTGAAATTCAAAATTTCAACCCTGCTTCTCTAGATGATGTTGCACGAGTTCATTCAAGATCTTACATCACTGGACTAGAAAAGACTTTCCGAGAATCACTTCTATCAGCTGGTGCCGGAATCACACTGGTTGATTCAGTGGTCGCAGCGTCAAAGTTAGGTCCTAATCCGCCCCTTGGCTTTGCATTGATAAGGCCACCAGGACATCATGCTGTTCCTCAAGGTCCCATGGGTTTTTGTGTCTTTGGGAACATTGCAGTGGCAGCTCGGTACGCTCAGCATCAACATGGACTAAAGCGTGTGATGATAATAGATTTTGAT…
>Zm00001d042993
AATGCCTGTTGCTTGCACTTGCCCGTTCAACGGCTGCCCAGCCCAGGGAAGAAGAGAAGGGTGTGAGAAGCATCCAGGGGATTGGCATCGTCCCCTCCTCACCAAATCCGCAGCCCCCCGGTGCTGACTCCCCGCCCCCGGCCGGGGCTCGCCACAAACCCATAAAGACCGCCCCGACGATCCGGCTTCCCCCGCTTTCTGAGTTCTGATCGCGGTCGCGGCACGCCATCGACCGGTCTGTCCAAGCGAAAACACAGTAGTCCGGCTCCGGCGCACAGGGAGATCGAGAGAGAGAGAGGGCTATACTAGGCACTAGCTAGGATCAGCCAGCGCGGGCGCCATGAGCTTGGCGGGGCGGCGCAAGTCGTCGCACGCGGGCGCGGGAGCCGGCGCCGGCGC…
>Zm00001d043024
ATGGGCAACAGCTTGCGGTGCTGCCTGGCCTGCATGGTCCCGTGCGGCGCCCTCGACGTGGTCCGCATCGTGCACCTCAGCGGGCACGTCGAGGAGTTCAGCTGCCCGGTGGCCGCGGCCGCCGTGCTCGCCGCGAACCCCAACCACACGCTCACCACGGCGTGGTCCCCCTCCGGCGCGCCGGGGTGCGGCTCCAGGAAGCTCGTCATCGTGTCGCGCGACTCCGACCTCAGGCGCGGCCGCATCTACTTCCTCATCCCGTCCGCGACGCTGCCGGCCGACCGGAGGGGCAAGAAGCAGAGCAGCAGCAGCAAGCGGCCGGCCCGCCGCCACCTGCGCGGCAGGAAGAGCGCCGGCGAAGACACGGCGGAGCAGGACGCCTACCTGGGGGACCTGCTG…
>Zm00001d043025
CCCACCTCATCGCCTTCCTCCTTCCACCGTTCCCTGCCCGCCAACCAGGACGTACACGCCGGACACACGTCACAGCCTTGAAGCCTCCCTCCCACACAACCCCAAGCCCCAACACAAACACACACACACGATCGGTCTCGTCGCAGCGCAGCGCCGCGCCGCGGGTTTGATCGTCACGAGTGGCGACTTCCTTCCCCTCCCTCTTTCGCCGATGACCACCTCGTCCTCCGGGAGCATCGAAGCACCGGCGAACTCCAGACCCGGCTCGTTCTCGTTCGCGAGCACGAGCACGAGCTTCACGAACATGCTGGGGGGATCTGCGGACGCGGCCGGCGGGGCGTCGAGGTACAAGGCCATGACCCCACCGTCCCTGCCCCTGTCGCCGTCGTCCTTCTTCAG…
>Zm00001d043094
AACAGGCCTGCCAGCCAGCCGCCTTTCGAAACCGAGCACCAGGGAGCAGACGCGGTCTCTGGAACCCAGGTTCCAGCGAGCAAACCATCTAACCAGGCGCTGAGAATTCTGTGCGGAGGAGGCGGATGGCAATGGTGGCGGCGGCGGAGGGGAGCGGGCGCAGGGACGCCGAGGCGGAGCTCAACCTGCCGCCAGGGTTCCGGTTCCACCCAACGGATGAGGAGCTCGTGGTGTACTATCTCTGCAGGAAGGTAGCGCGGCAGCAGGTGCCCGTGCCCATCATCGCGGAAGTGGATCTTTACAAGTTCGATCCGTGGGATCTGCCCGAGAAGGCGTTGTTTGGTCGCAAGGAGTGGTACTTCTTTACGCCGCGGGACCGCAAGTACCCAAACGGCTCGC…
>Zm00001d043144
ACCAGCGCAGAATCAGCAAACGCGCCATTGACGCGCACTCGTAGTCTTGACTCTTGCGTGCTTCCCTCGTCTTCTCGGACGTTCCGTTCCATCGCCATGGCGGACCAGCTTAGCGAGGAGCAGATTGCCGAGTTCAAGGAAGCTTTCAGCCTCTTCGACAAGGACGGCGACGGTTGCATCACAACCAAGGAGCTCGGAACCGTGATGCGGTCTCTCGGGCAGAACCCCACCGAGGCGGAGCTGCAGGACATGATCGCCGAGGTGGACAGCAACGGCAGCGGCACCATCGACGAGCAGGAGTTCCTGGGCCTGATGGCGCGCAAGATGAGGGACGCGGAGTCGGAGGAGGAGCTCAGGGAGGCGTTCCGCGTGTTCGACAAGGACCAGAACGGGGTGATC…
>Zm00001d043234
AGATACACGGGTTTAGTTGCCTCTTGCTGCTCGTCGTTTCCAGCCCCAAGCTTGTTCAGAAATCAGAGCCCCATATGTGGCGCCACCGCCACGCACCGACGCACGCCCACCACCACATCCCGATCTGGGCGTTCGGCCTACGCCAACGCAAAAAAGAGCAAAGCTCCTTCTTTCCATCTGCACACGAACGCGCGCAACACCGCAGCCGCGCTTACAAATACCCGCCCCAAGCGAGCGAGGTGCCCGCCTGCCCGGAGCACGACACGAGAACACCACCACCAGGCACCACAACCAACCGACCGATCGAAGCCGGCAGACAATCAATGGACGGCCAGGGCAACAGCGGCAGCGCGGGCGCGGGCGACTGCGACGCGGTGGCGCGGGCCTTCGTGGACTACT…
>Zm00001d043252
ACAGCCCACAGCTCCCCCTGGCCGGTGGCCGCCACTCCACGCTCCACGACATTCACCACCACCACGGCACCACCCTGTCCCTTCAGCTCCAACGTGCATGAGAGACGCCACTCGCGGTACCCACGCGGCGGCAGAGGCGCTGGCGGCCCGTCGTCCGCGCCGAGCAATGGCGTCCCCACTGCTCTGCGGCTGCGCCCTCCTCCTCTACCTACTTGGCCACCTCGCGACCTGCCACGCCGCCAGGGACACCATCACGCCGAGCAGCCCGCTGGCGGCCAACGAGACGCTGGTCTCGGGCGGCGACGGCAACTTCGCGCTGGGCTTCTTCACCCCGCCGGGCGCCAACAGCACGTACCTCGGCGTGTGGTACAACAAGGTCTCCCTCCGCACTGTGGTGTG…
>Zm00001d043325
AAAGACAACCTCCTTCCACGTGAGCGCTTTCTTCCTTCAGCCTTCTCGTTATCCTGAACGCGGCAATCTCCGAAGGTCCCATCCAAAACCTCGCCGCCGGATTCGCACCTCACTCTCGCCCGCGCACTACGAATTGACTGACGCCTACGCCCTACCGCTGCAAGCAGCACCATAGCGGGAGCCGCTACCATGGCGTCCTGCTACAACCCGTGGCGCCTATTCCCAGGCATGTCGACGGCGGTCCCTGCCGGGCCCGTCACGGCGCCGGCTCATTCTCGCACCTGCAAGTCCTCGAAAGTGTTCAGTGCTTTGCCTCACCGGAGGGGTCTGCTGTTCCTGGGCACGCGGCGTGCCAGGATCAAGTGCGTCAAGGACGACTCTCTCCATTTCGACCCGTCG…
>Zm00001d043344
GTGCACGCCACAAATCATCCAAATTAAGCTAACAACGAACGACAACTCCACGCAGAGCAACAATGGCGCCGCCGATGAAGGTGTACGGGTGGGCCGTGTCGCCGTGGATGGCGCGCGCGCTGGTGTGTCTGGAGGAGGCCGGCGCCGACTACGAGATCGTCCCCATGAGCAGGTGTGGCGGCGACCACCGCCGGCCGGAGCACCTCGCCAAAAACCCGTTCGGTGAAATCCCAGTTTTAGAGGACGGTGACCTCACGCTCTACCAATCACGCGCCATCGCACGGTACGTCCTCCGCAAGCTCAAGCCAGAGCTCCTCCGCGAAGGCGACCTCGAGGGGTCGGCGATGGTGGACGCGTGGATGGAGGTGGAAGCCCACCACATGGAGCCGGCCCTGTGGC…
>Zm00001d043374
ATGTCCATCCAATCCAACTCATGCACTTCATCACTCCTAGAGGAGTGCAGAAGCTGGGAATTGTACTTCCACTACTAAAAAATGTGATTGATCACTCGTTTATCGGCAAAGATGTTTCTTTGGGAGTGAATACCGAGAGGCTGAGATCACCACTGACGGCCGCTGCAGCCACACGGTTTGCGTATAAATAAGTAGTCAGTCGCTCATCTTGTTCCTTGTGAACATCGCAGTGCTGTAGCCTCCTTCGTCTTGAGCGAGCATGGAGATGTCAGCCATGGAGGAAGCCCTCCCCAAGGCGATGGAGAGGAGGAAGGGAGGCCTCAGAACCATTCCGTTCATCATCTTAAACGAGATATTCGAGAAGGTGGCCACGTTCGGGCTGTCGGCCAACATGATCCT…
>Zm00001d043512
AGAAAAACAGGGGAACTCCGTTCCCACCGCATCCAGCTATCCCCACCCAGCGGGCAGCGGCTGACAACCGCAGCGGCCGCGAGCACCAGTCAGCACAACCAAACGCCCACGCCACGAAGCCGCCGGAGACAATGGCGCCACCGCGGCGCGCGTGCCCGTGCGCGCGCGCCTGCTTTGTCCTGCTGCTCGCGCTGCTCCCCTGCTGCCGCGTGCGCCGAGCGGGCGCGCAGTCGCAGCCGGCGGACGACAAGCATCTGCTGCTCCGGATCAAGAGCGCGTGGGGCGACCCGCCCGCGCTGGCGGTATGGAACGCCTCGTCCCCGGGCGCGCCGTGCGCCTGGACGTTCGTCGGGTGCGACACGGCCGGGCGCGTCACGAACCTCACCCTCGGCAGCGCCG…
>Zm00001d043538
ATCGTCTGCAACTGCATCGCTCGCTCTCTCCTTTCACTGGGAACATCTATCAGCTCGCGCTCATTGGCCATCTTTGGCTTCCATGGAGAGGCTCATTGCCGGCCTACTTGGCTTCCTATTGGTTGCATCGGTAGGAAGCCATGCAGCTCGTGCTCCGGATCAGTACTGGAAGTCTGCTCTTCCCAACACTCCCATGCCGACCTCCCTCTCCCAACTCCTCGACGCCGCTCCAGCCGGCGGCGGCACGACCGTCAACGTCGGCTGGGGCGGTGTTCACGTCGATGCTGGGCACGGTAAGCCCGGGGGTACGACGGTTGACGTAGGCAAGGGCGGCGTCGGCGTCAACGTTAACCCTGGCAGGAGCGGCAAGCCCGGCGGCACGACGGTTGGCGTCGGGAA…
>Zm00001d043543
GAAAAACTAGAACATATGCGCCACTGCTCAAGAGTGGATGGCCAGTAATTGATGGTAGAGGAGCACAACATATAGGGCAGAGCAAGCCTCACCTGCCTTTTGGGTTGAGGTAGGTCCGACCGTCGGAGATCTTGGGTTTGTTGTGGGCTCTGGTGGCCTAGGTCTGGCGTGGCGTCTATTCATGGGTATAGCGAGCTGGACTAGATTTGCTGCGCACTAACAATTGGTATCATAGCCCATGGTCGAAAAACCTAGAAAATCTTAGGGGTCACTTGGTGACAGGTGAGCCTGTTAACATATCAAAGGGTCACACGACTACACGAGTTGTGTGTGACATGATGTGTCGGACTAAGGGGCCTGGAGCTCATTGGTCCTGCAGCACACCAGAAACACCATCTC…
>Zm00001d043613
ACCCACGTCAGCCGCCCGAATCCTCCAGAAACCGTGTGCTCCCCGAAGCAGTTTAGATATCTTCCTCCCAACCTTCCCTGCCAAATCGCGGTCACTGCTCCGAAGTCCGAACCTTCATACACATCGTCTCGTTTCCGATTTCCCCAAATTCAGGCCACAGGCGCTACAGGACCCAGGCACCACTCGGTCGGCGGCCACCGCGTCGCCCCGCCTGCTCGATTGGGGTCGCGTGTGCGATAGGAAGTTCGTCATACGCCTCGCGGTTTTTCTAGTTTCCGTTTTGATTTCTATGCGCCCAATGTTTTGTCCGATTGATTGATCTGCTTAGGTACGTGAGACTGTCTCTATTGTTCGTGAGTGCGTAGATGGTGGGTGAGTCTGGTTGTTTAGATTTGTGAC…
>Zm00001d043619
ATGGGCCTGCTGTTGGAGAGGGTTTATGACCAAATGCCTGAGCCTAGATGGGTTATTTCAATGGGCAGCTGTGCCAACGGTGGTGGATACTACCATTACTCCTACTCTGTTGTACGTGGATGTGACCGTATAGTCCCCGTGGACATCTACGTCCCTGGGTGCCCACCAACTGCTGAGGCACTGCTGTACGGTGTTCTTCAGCTCCAAAAGAAGATCAACAGGCGTAAGGATTTCCTTCACTGGTGGACCAAGTGAAGCATGCTTCTGCTGTTGCTCGCTTGCTACGTTTCTTTGCACTCGACCTACCTGTCTTATCTGAAATAAGGACGGACTTTGCTCGGATTCACAAATTTGTTGTGCCTGGAAGGATGTATGCCCAGGTTGTGACGAACATATAAC…
>Zm00001d043652
ACAACACTCGTTTGCCTCTCATCTCGCTTCGCTTCCATTCCATCGCGCCAGTCGCCAGACTCACCTGGGAGAGTGGGGGGAAATATCAATTAGAAACAACGAGGAATTAGCAAAGAAAGAAGAATAACTCCCATAAGAAAAATCGCCAAATACGCCATTCATCTTCTTCGCCCGGGTTTCAGAACGTACGGCAGTTTAGCCAGGATGGTGGCGATCGAGAACCAGAGCCAGGCCGCGGTGGCGGCGGAGGCGGTGGCGGCGCCGGCGTCGCGGATCCCCAGGGAGGCGCGGCGCCTGCTGCACGAGCTGGCGGCGGCGTGGGCGGACGTGGCCGACTGCCGCGCGCTGGAGGTCGTGCCGCTCAAGGGGGCCATGACCAACGAGGTCTACCAGGCGCGC…
>Zm00001d043663
ATGGCGCTATCGTCCCGCAGCTCATTCGCCGCCGACGTCCTCCTCCCAGCCACCATGTCGTATCGTCAGCCGTGCAGCGGTGCTTCCAGCTACTTGGGCTCTCAGCCCGCGGCCCCTTTCCCGTCGGCAGCGTTCGGCGCGGTGGCGCAGCTGGACGTCTTCGACTGCCTGTCGTCGGACGAAGGCGTTGGCGTCCCGGCAGCTGTACCTGGTGCGTTCGCGCCGCCGCCGCCGCTTATGCCGGCCGAGCGCGTCGTCCCGGACGCTGCTGCAGGCTACAGTAGTCATACTAGGAGTGCAGCGGCTGTGGCGGGTGAGGGGTCGAGGACTACGCACAGAATTGCGTTCCGAGTGAGGTCGGACGAGGACGAGGTACTCGACGACGGCTACAAATGGAGG…
>Zm00001d043734
AAGGAAGGGCGGGGGCTACATAGCAAGCTCCTTCTCTGCGAACCGAGCGAGAGCAGCTGTAGCCTTAGCCTACACTCTACAGCTAGAGCAACGACCATCCACCTGAAAGAGGGAGAAGGCATTGGGGGTTCTTGAAGTGCAGTGCAGGTCCAGGCAGCTAGCAGTGACCGAGAGTGAGGGACAGGGCAATGGCGTCCTCACTGCTCCACTGCCCCGACAAGCTCCCGTTCTTGGACGTGGAGGCCATCCTCCACATGAAAGAGGGGCTCGGCGAGACCAGCTACGCGCAGAACTCCTCGCTTCAGAAGCGAGGCATGGACACGCTGAGGAGCCTCATCACCAGCACCGCGACGGACGTGTACGTCTCGCAGATGCCGGAGCGGTTCACGGTGGCCGACC…
>Zm00001d043898
ACGTCTCCTGCCTCTAGATCCAAGCTAACGGACCACTGCTGTCATTGCTGCCTGGGACCGGGAGCAAGAGAACGACGACGAAGAGATCGGCTGAACAAGAGGGTCGCGTAGAGCCATGCTTGCGAGCGCGACGAGGGCAGGGACGTCGTCCACCAAGCCCGGCCTCGCGGAGGGCGCCGTCCGCAGAGCCAGAGCCAGAGCCAGAGCCGGAGACGGCGGCAGCGGCACCCCCATCGTCGTCACCGATGCCGGGCAGGAGGTCACCGTCTCGCAGTTCGTCGCGCAGCTAGATGAGGCGGCCCGGCGGAGGCTGGACAGCATGCACCAGAGGCTGAGGCTGCTGGAGCAGCAGATGGAGACGCTGGAGGCCGAGGTCGGCAAAGCCAGCAGCAGTAGAAT…
>Zm00001d043968
GTACGACACAGCCTCTGCACTACAAAGCAAGTGACAATCTTTATGTATGTTAAATAAAAACGAAATGTCAAGCAACAGAGGTTCATATACGTCCTCTATGTGCCAGTGATGTACTGATACATCCGTTGGTACCCTATCAGTTGTGGCTTCACATATTTTAGTTGTGGTTTATGTAATAATACCTTCACGATTTTTGTTTTGTTTCCATGGCAATTATGCCTCTCACAAAAAATATAACGCCCTCACAAAATCTCAGTTTTCTGGTAGTGGCCATATGGTGTGACCCTAGTACACAAAGTGCCAATTAGAATCACATTTTTTTGACATAACCACAGCATCTACATTGTTAGACATGTTCACATATAACTACCAAAATTCCAATGACCTTTTAATTAAGAG…
>Zm00001d044120
ATGGCGATCGCCGTGCTCCCTATCCTCTCCGTCCTGATTCTGGCTGCCACCAAGCAGATGGGAAGAACCGTCTTCGCCCCTCCCAAGCGCCGAGAGCCGCCGGTGGCGGAGGGCGCTCCTCTCCTCGGCGTCCTGCCTGCCATCCTCACCAGGAGCTTGCAAGGCGTGATCTGCGACCAGTACTTGAAGCTCGGCAGCGTGTTCACGCTGAGCTCCTTGGGAGTGAAGGTGACGTTCCTGGTGGGCCCCGAGGTGTCCGCCCACTTCTTCCATGCCGCCGAGTCGGAGATCAGCATCGGCGACGTCTACAAGGTCACCGTCCCCATCTTTGGCAAAGGGGTCGGCTATGACGTCGACAACGACACGCGCAACGAGCAGCACAGGTTCTTCGCCGACACT…
>Zm00001d044156
ATGGACGACGACGTCGTCGTAGCAGCTGCAGCTGCAGCTGCAGCCGCGGCGGCTTCGTCTTCGCCATCGCCGCCGTGGAGCCTGCTCCAGGGGCTCCTTGCGCTGCTCGTCGCGTGGGGGGCCTACCGGGCGGCGCAGACGTTCTGGCTGCGGCCGCGGCGGCTCGGCCGGGCGCTCCGCGCGCAGGGGCTCACCGGCACGGCGTACCGCTTCCCGGCGGGCGACCTCAAGGAGAACGCCCGCCTCAACGACGAGGCGCGGTCCAGGCCCATGCAGCCGCCGTGTAGCCATGACGTCGTTCCCCGCGTCATGCCGCATCTCTTCAACACCGTCAAGGACCACGGCAACATCTGTATTACCTGGTTCGGACCGATTCCCAGGGTGGTGATCACGGAGGCA…
>Zm00001d044157
CACGAGAATGCCCACCACGGCGAACCTTACAGTACAAAACAATGGACCAACCAAGCTAGCCAGTGAGGCAGTGATTACTGTTTATAAGAGGAGCAACACTGGCGCAGATTTCAGCGATCGTTCACTCTGCTTTCTCCAGTTTCACTTGAGAGCTAGCTGAGACTGAGAGCAAAATGGTTCTTGGAGCGTTGGCGAGTGCAGTCGCCTCGACGGGCCTCCTCATCGTCTACGGTGTCCTGGGCGCTCTACTCCTGTGGAAGGCCGCCCGGCTGCTGGACCGGCTGTGGTGGGAGCCGCGGCGGCTGGAGCGGGCGCTGCGCGCGCAGGGCCTGCGGGGCACGTCGTACCGCTTCCTCACGGGCGACCTCAGGGAGTACCGCCGGTCAAAAGAGGAGGCCG…
>Zm00001d044321
ATTGATGGAAAAGCTGCTTTGCTAGGATTTGTGCGGGCCCCATGGACAATTGCAACTTACATTGTTGAAGGGGGGATGACCAACACATACACAAATATAAAGAACATGTGCCATACAGCTCCCGATGTCTTGAGACTGCAACTAGCACAGTGTATAAAACTGCTTTACTTGGTCATAATGATTGTGAATAGGATTAAGAAAGAGTGCCCTCATGTACCCCTTATGTTGTATATAAATGGAAATGGAGGTTTACTTGAGCGCATGAAGGACACAAGAGTTGATGTTATTGGCCTTGACTGGACAGTGGACATGGCTGATGGAAGGAAGCGCCTTGGTAATGGAATCAGTGTACAAGGGAATGTGGATCCAGCATTTCTGTTCTCACCATTACCAGTACTG…
>Zm00001d044566
GAGGGAAAAAGCTACTACATTCTTTTTTTGAAGGCAAGCTACTACATTCCTCTTTCGATTCTTCTCCAGTTCTCCCTGTCACGTGACTAGGGCTAGGCTAGGCTAGCCAAGCAGAGGAGAGGGGAGGGCAGAATTCCTTGCTTGCTCGGCGGGTGGTCGAATACGAATACTGCGGTTGCCCCGCCGCCCCGGCAACCGCAGCACATCTCACCCCATTCCTCCGTCAGTCTCCATTCTCTCCAATGGCGTATAAATCGCCGCTGCCGCCGACCGCCCTGCCCCCATCATCATCATCAGTAGCAGCATCACGTTCACGCGCGCGGCGATGGAGGCGGGGCCGTCGAGTTCGGCGGCGATGAGCGCGGCGAGGCGGAGGCGGGACGCGCTGGCGCAGACGCT…
>Zm00001d044671
ATGGCCAAGGTCTACCCAAACAGCGCAGCCGTCGCGGCAGAGCCCGCCACCCGAGCCGCTGCCGGCGACCAACAACCTGAACCGCCGACGGTGCTGACGGTATGGCGCAAGTCGCTGCTCTTCAACTGCGACGGCTTCACCGTGTACGACGCCCGGGGAGACCTCGCCTTCCGTGTCGACTGCTACGCCACCTCCCGCCGGCGCGCCGAGGTCGCGCTCATGGACGCCGCAGGGGCGCCGCTGCTCACGCTCCACCGCAAGAGGCTCAGCCTGGCGGAGCGCTGGCTCATCTACGAAGACGGCGCCGGCACCACGCAACCGCAGCCGCAGCCGCGTCGCCCTCTCCTCTCCGTCCACCGCCACGTCGGTCTCCGCGCCTCCGGCGGGAAGACGCTGGCG…
>Zm00001d044686
ATGGCTCGCACGCAATCTGCCGTAGCGGTCGCCGTGGTGGCCGCGGTGCTGCTGCTGGCAGCGGCGGCGACGACCTCGGAGGCCGCCATCACCTGCGGGCAGGTGAGCTCCGCCATCGCGCCCTGCCTCTCCTACGCCCGCGGCACGGGGTCCGGCCCCTCCGCGTCCTGCTGTAGCGGCGTCAGGAACCTCAAGAGCGCCGCCAGCACCGCCGCCGACAGGCGCGCCGCCTGCAACTGCCTCAAGAACGCCGCCAGGGGCGTCAGCGGCCTCAACGCCGGCAACGCCGCCAGCATCCCCTCCAAGTGCGGCGTCAGCATCCCCTACACCATCAGCACCTCCACCGACTGCTCCAGGTAG
>Novel00789
CAGCTGTTAACCTTAGGTCATCACTTGGCATCAGCAAAGATGAGTTTGGAGTTGCAAAGCTGCAAGAACGATTAAGATTAGGAGGCGATGATGACCTCTCAATTCGATGTTTTTTCTTGATCCTTTTCAACCGGCTGCTATTCCCAACTGCTAGCTGGTCTATATCCAACAATGAGGTGCTCTTGACAGAACAATTGGATCGTTTCCCTCATATTGATTGGTGTCATCTCATATTCAACGACTTATGTGAAGCTGCCCATAAATGGCATAACAGAAGCACTACAAATGTGTCGGCGACGATATATGGGTGTTCCATTGTCGTTCTTGTGTACTACCTGGACCACCTCCACCACGCTGTAGCCCCCAACAACAAAAGCGACACACCGCGTATCAAATATT…
>Novel00793
CTGGTCGCCGGCTTCAACGAACCGCGCAATCCGCGTGGCGAATCTTCCGGTGGTGCTCGCCCACGTCGGCTATCCGCACCAGCAGAGCGAAATCGAGGAGAGTGAGAGAGAAGAGGATTTCCGCCGCCGTGGTTTCGCGACTACGACGCCGGAGCGGTCAGAATTGTTGGCCCGGGTGCTTCTACGCAACCTCCGGTGTGTGCTCTCGGCCTCTGTTGGCGCGATTGAAGCTCTGCGCGCCGGCGATTGCTCATCGAACTTCAACCGGGACCGCATCACGTGGCCAGAGCCGTTCGCATAATAATTAGTGACGAGCAAGCTACAGAGGATTCTGAGGTTCAGCTGGTAGAGACTGCTGAGCAGGAGCTCGTGGAAGGAGAAGAACAGGTGGTCGAAGAG…
>Novel00807
GACGTTTGCTATATATATGGTGGCTCTGAAATCTAGTTCAGTGAAGGATTCACCTGGCCTTCGGATTCTAGCCCTAGACCAGTGTAAAAGTGTGGAAGTCCTTGTGCTCCAGTTGATGCCAGTCTCTTCCCAGCCACTAGGTTTGCTCTGCACAAGTGTTGGCACACCATCGGTCTGCCAGTAGTGACCACGCCGGTCAGTTTGGCCATGTCGCCGTGGCCAAGACAACTCAGCAAGAGCTCCGAGCAGAAGGAGTGTAAATTCAAGACGAAGTGGTTGTGGAAGAGGAGTTTGCTCCAGTGCCTATTCAGCAAGTGGATGGAGCTATCTAACTGGTTATTGGGTAGAAAGGTCTTAAGCCTCTTCACTGCAATAAAGGATGGCGGTGCCGAAGATTGA…
>Novel00818
GAAATCCAAAAGCAGATTTGAATATAGCAATTAAAAATAGAAAAGAAATAGAGAAAAGGATTTCCTGCTGACGTTGGGCCAAAACCACCAGCCCGACCCAACACCATGCGCACGCAGAAGCCTAGCCCCTCACCCTTTCCTTTTTGTCAATGGCGCGTGGGCCCCGTCTTCCAGTAAAAGCTATCCCCTCCCCTATCCAATGTTCACGCGTACACCATGTATGGCGTGTGGGCCAACCCTGTCTGGTGCTTCCCCTAGCTTCGGCCGTTGCAAACCGCCCCAACAAATCCGCGTCCAAGTTGCTGGAATCTCTCCCCGGTCGGGCTCAGCAATAGAGTATAAAACCTGAACCCTGCACCCTTGAAGCGCCCAACCCGCCATATTCAAGAGCCCTCATCG…
>Novel00820
CCTACGCAAAGGATTCTTTATTGGCAGAACAACATGGGAAGAAGTGGTGATGACAGTCCATCGCCGCCAAGAGGTCACAAGAGAAGAACTCGCAGCCCAAGTCCTCGTGGTAGTTATGGAGGCCATGGCAAGCGCCCCACAACTAATCTTATGGTGACGAATCTTGGTCCGGATTGTAGGATTCCGACTCTCATCAAGTGACTCCTCCCCTCACGATGACTTTGCGGACAGATGTCTCAATTATAGTGGTGGAGGTACAAACAACAATCTGATGTCCTGATCGAGAGCGATGGAGCTAATGTATGGACTTGTGTGTTTGAACTTGTGAACTAAAAATATGAACTATGGATGTGAACTTATGTATTTGGACTTATGTGAATTTGTGAACTTATGTATTTG…
>Novel00836
CCCGCCCGTCACCCTCTCTATCCGCCCAAATCCCTCTCTCCTCCCCTGCTCCACCCCGATCCCCTGCTGCTCGCCCGTAACCGCCGCCGCCGCCGATCCCCGCCTGCGAGAACGATCCGGTTGAAGAGCCCGAGGAACTCGCAGGAGAGGCCCCTGAGCAGCAGTCGGTTGGTGGAGGTTGTCCGCATTGCCACCACTGCTCAGGCGAAGATGAAGCTGTGGAAGGAGACTTCCAGGAGTTCCAAGACTACGACGAGTTCTAGGCGTGGGTTAGCGGCAACCCCCAGTCGGCTGCCTGTGAAGGCCGCGTTTATCTACGTTTCTTTTCCGCACTTTGATTTATTGTAAGAACTATATGGACGTCTCAGACGTATGATGTAATCGACTATTATTTCCCTT…
>Novel00848
TATATCGATACCTAGTGTTTACTTGCGAATGTTTCAATGTCATGACATTAGAAGTTTAATTTATTATCGTGTGATTTTGTTTAGCCTTATGTTATTCATATTTATAATCATCCATATGCATCTGGCATATCAGATAGGTACGCTAGATGATTATGCGATATGAAGGGCATGAACCAGACTGAACCACAAGATGGATGATCTGACCCAGTGCCAGGATGAGAGATGCTCACCGAGTGGTCGTCGTTTGACAACACTAACTTAGTGTTATTCGAGGCAACTCTTTCACATGGATTTTTAAAATCTGTAGTGTTTAAAGAACCAGAAATGGATTTGCTTGTTTCTAATTCATTTTGCTTGTTGGATGTCGATATACACATGCATTTTCAGGTAAATTCATTC…
>Novel00894
TTGGAGCTCCCTCCGCGCTTCGCGCTCGCACGCTATCCGCCCAGCCGACGCGTGGCCCGCGCTCCCGGCTTCTCTCACAGTACACCACTGTCCACTGCTTTAGTTTTTTTCTCTCCGCTGCACTAGAACATTCTCTCTCTTGTAAACTTCATAGTTCCTACTTCCGAGCGAGTAGCTAACACAGCCGCCGAGTAGCTTCAAGTCATTCACCGTGGAGGACCGCCCGGGGGAGCAGTGGGTGCGCCTCCACGCCAGCGCGGGAGGGGGAGGCGAGGAGGTGAAGGTCGAGGCCACCATGTTCGACGGCGCTGCGGAGCGTGTCCCGGACGACGCGCCCCTCTTCCGCCGCGTCGAGTCGCTCGAGCGCGGGCCCCGCCTCCACCTCAGCCTCATCGTCGA…
>Novel00901
CCTGACTCTCCAAACGTGATCTCAAAATCCAGGAGCTGAGCTCCTCCCGTGCGTCTCCTTCCGACCCCGTCCTTCATTCAAGCTGCTGAAGCCGTCTCGCATCCGAGCCCCTCTTCCATGGTCGTCGTCCTCTGCTTTCCTTGCTCGGCCTCCACCCCGTCAGTTCGTCTCGTCATCACCTTGCTACTGCATCCGGTGTGGAGCGATTTGTGTGTGTCGATAAAGCAAGCGAAGTCCCGCAACGTCCGCCAGGTGTTCGACAAAAATAAAAAAATGAGCCAGGTGTTGTCGCCGCGTTCACGGATTTCTAATTGACTTGAGTACGTTAGTGATCACGTGATGCGGAGGACGAGAGCCGAGTCGACCTCAAGGTGATGCAAAGGGTGGATTACTCCGAGA…
>Novel00906
CGCTTCTCTGCCCTCTGCTCGTCGATTCGGCGCCTCCTCTCCTTCACGCGCCCACGCTGCCGTCGCCTCCTCCTCACTGTCGTCCATGCCGCTGTAGCCGCCTACGGCCATGGCCGCTAGAGCCAGCGACTATTTGACGGTGGAGTACCACTCCAGAGAGCTCCCCTCTTTCCCCTCCGACGACGAGGGAGGCACCGCCGGCAGTGGCGTCCTCGTATGCAGAACAGCAGAAGACGCTCGCTCGCTCTGCGCGCATCGAACCAAAAACCACACCTCGGCGGCAGCTATATAAAAGCCTTCACCTGACCCGGGCGCTAGGGTTTATTCGCTCCTCCCACCCGCCGCCGTCGCCGCCTCCTCTCCCCAGCACCCGGAGCTCGCTCGACCGCCGCTCACCAT…
>Novel00915
CAGCAGATCCTACTCTTTTCCATGGTGGCCGAGCACAGCTACCTCCATGGACGCCCCCCTGCTCGCGTCAAGGGTGGCCAGCTCCCTGCTGTCGCCGACCATGGCTGCCCAGCAGCAGGAAACTTTCTCCCCTCCCTGCTCCATTTTTTTTCCCTGTGCCCTCCTCTGCAAACAGCGAGCCCCCTCCTCACTGTTCTCCGTGGCGCCCGCCGGCTGTTCGTAAAAATGTGCAGCAAGCCGCATGCTGCCGGCTCGCTGTTTCGTGAAGCCCGGTAGACAGCACGCCGTGACGCTCGCCGGGCGTTTGCTGTTTTTGGCGCAGACCCGCTCGCGATGTCATCGACCCTCGCCACCATCAAAGTCGCGCTCCGCGCTTGGCCGTTCGACGAAATGCCAAGC…
>Novel00925
CTGCAACAAAGGCAAGCCCCGGTGCATGCAACCCCTTCCTTGTGTTTTTAAAAGATTTTTATACACTTTAAGTCTAGTGAAATGTGCATTAAGTTTATAGGAGTTGCTTGGAAACTATTGGATGCATTGCCTACCTTGATATCCATACCTTTATAGATACTTCTGATGAAGTATCAAAATATGATTTACAAAAATGCTTAGCCCTGCTTAGATCTTGTGGATAGAGGTTGTCTTTTGCATTAATGCCTAGCTCAGGGGTTATCCTGAGAAAGGACGGCTTCTACCTGCAAGAATATATTTTTATTGGGAGCATAGTGGGATCTTACTGCAAAGTTCCCTATAATGCTCTTTTCATCCTAAGGAACACAGACAATCCTAAGGATGGAAGTACTTAAATCA…
>Novel00928
TATCTCATCCCTTCCTAGGTCCCAGGCTCCCCGCGCCGACTCCCACAGGCTCTTAGCGCTGACTCCTTTACGCGCACCGGCTCACCATACCCTCAACCGGCGCGAGGACCGGCGCCGGCACGGCTTCGAGTTGGCGCGCTGCGGCCGCAGACCTGGGCCTGGGCGTGTGCCGCCCGGAGACGCTCGCGGCTGCGGCATCGACTTGGGCGCAGCGACCGGAGACCTGGGTGCGGCTTCGACCTGGGTGCAACCGTGCAAGGCCATCCGACGCTGTGCACAGGGCAGGAGTGACGTCTGACAGACTAGGGCAGGGAAATAGTTGAGAACACCAAGAATATCTAGAATCAAAGCTTCTTAAGAGGTCGGAACAAAGAAGAGGAGAAAATGTATTGAATGTGG…
>Novel00931
CGTCAATGCACTTTAAGGGGGTTGCTGGTCGTTGGTTTTATTGAACCACAAGTATCTTCATGGTCATGACGACAATTTTGTCATGCTATGCACGAATGCTTTGGGTGTGAAAAACAAGAGCTTGTTACACGCAAACTATTTCATATTCGTCAGACATCTTCTATCCAGGACTATGTTGATAGTTTTTGTTAACTTATTGATATCCTTGTCACCTATGAGCACACTACAGACCCCTTGTATTACACCATGAAATTCATTGATGGCCTGCTCGACGATATTAAATCTGTTAAATTGGTTCAACACTCGAGTACTTTGGATACTGCCTGCGCTCTCGCTTTGTTGTAGGAGGAGGCCGATTCATCTAGGCGTCATGAGTACCGTGGGTCGGAGGGTGCATTT…
>Novel00958
ATCCCACACCGTGAGTTGCATTGGAGCCGAATTCGCGCCACCTCTGTCCCCTTCTCTCAAATTAAGTGTGCGTAGTAGAACTAGAGTTCTTTGTGAAGCCATAGCACCCGCTCCCACCCTTAATCATCCACCCGAGCTCTTGAATTTCAAATTTCCCCCAAATTTGTCTCCGCCACCGCGAAGAACAGTTCCACCGTTGCCAATCCGTTCTGAAAACGAAGAGGAAACCGAAGTAATTGAAGAGAAGACACCACCACCACCCTCGGAATCTCAGGCACGAAACTGTTTCTACCTCGATATCTGCGGGTCCAAACCTGACTCACCTATCAACGAAGGTGAGGAAGCAGCAAATTTTTGTTGCTTTTGTACCAGGGTGGTGCCAAATGAAGAAAAGCAAGA…
>Novel00961
TTCTTCCTCCCCACACGCTAACGACCTAGAGCTATCGCCGTGGATCCCGCCTGCGCTAGCAGCTCGCCCTCAACCACCCTACCCACTCCATGGGCATAAGCTGACGGCTGCAACCCCTCTCTGTTTCCTCGCCTCATCAAGCCCTGCACCGTGGTCGTCGTATGAGGAAAATTCGCCATACGTGAGGGAGAGTCGGTCACCACCGTTGGATCGCGACTTCATCGCCGTTGGGGTCCGGGAATCGGGCCAGGAGGCGTCATCGTACCACCGGGTGTGTGCTCGTGCGGCGGGGGAAAATCATCCTCACACCGATGACAATTTCTCGTCAAAGCTCCGCGACCGCGCCAATCCGCACTTCACCGCGGACCGGTCTCCTGTGCGCGCCATCTCCGAAGAGCC…
>Novel00962
CCGCCAGTCGCCATTGCTCACTGCTCTGCTCAGCGCTCCATGTCGTGCCCCAAATTCCGTGACTCATCTTCCTTCTCTTTGCCAGGCTGCGCGTGCATACCACGGACGGACGCACTGCCCCCAATCTACTGTAAGTAATCTACTAATCTGTAAATCTGTAATCCCTAATCCTAGCTTTGTGGCCATATATGGACGCACGCACCGCCCGGAGAAGGACCTGCCCTTGCCGCTGCCGTCGGCTCGCACGCGCACGCCCATGCCCCGCTTGCCGCCGCTCCTCTTCCTGAACAGCCTGCACGGCTTCTCCTCGGTTGCTGCAAGCCTGCAAAGAGCTCCGTGGTTGTAGGCTGTAGCCTACTAGCCTCTCCCTCCCCCACCCCCACACGGCCACACACTTGT…
>Novel00966
CGCTAGACCGCCTACTCTCCCCATCCCTCGCCGCCTCGCTTCACCCCACCTATGGTCGCCGCTGCTCGCATCGCCCTGCGGCCCCCACCTCTCTCTCCCTTTCTCCTCGCAACGCCGCCCCCGTTTGTCCACCAAGTCACCACGCGCCTGGGAGATGGATCAAGGGGCGCGCAGCAGTCCGGTCAAGACACGCTCAACGAAAGCTTCAAGATAGCACGGGAGATGGAAGCCCCACCATCGGCTAGGAATCGTTGCATCACGTCATCCGATTCCTCTCCCTTCCGTTCCTTTGCTTTCGTGGTGGATGAGAAGAAAGCGGCGAAGGGCGCATCGGAAAAGAGAGCCTGGAGGAGGAGGCACACCATCCTTCCTCTTGCACACGGAGTCCTCAAGCTTTCT…
>Novel00969
AAAGAAAGAGGAAGGGTGAGAGGGGGTTGGAGGGGGTTGCGCTCGTGCTCGGAGACCGGGCTGGTGGAGCTGTGGGGCCTCTGGTGCTCTACGCACAGATCGGAGTCGTGGCTGTGGGCAAGACACGATCGAAATCGCTCACTGTCGCTTGACATCGCCTCGGTTCCACCCCACGCTGTGGACCCGCTCCATCACAACAAATCCACGGAGGAGCAAGTGATTGAGGACCCCGGTACCCAGCAAGTGGGAACTACTGAACAGGAGCTCATTGAAGGAGAAGAACAGGTGGTTCAGGAGGAAACCTACAACGAGGAGTACGAGCTTATCTAGGTGGCGTCTCCCAGTCAGCTTGATGGCATCAAGGAATAATACTTAGTTCACTTTATTGTTCTTATTTAT…
>Novel00972
GTTCTCCAGCAGGGAGCTTTCTTCCTCCCTCCCCACGCCAGCCTCCACCACCGGCCACAGCTCCCTGGTGCTCGCCCCTCCCAGGTCCGCACTCCAGCCCTCCCCATCCTCCTCTTGCTATGGTGCCCAGCCGAGCTCTCTCCCCTTCCTGCAGCACACGTCGTGCTCCCTCCCATGGCCGATGCCCCTCTCTGGAGCTCGCCCCTGCCCTCTGTCCAGCGCCCTCCCTTCTCGCCGTTCCTATCCCCCTGTCATGGAGTTCGTCGTCAGTCCGAGCTCGCCCATCCTTTGCTCGGTTTCAACTTGGTCGTGCCTGCAGACCGCCTCCTTTCCTGCAGCAGGTCAGCGCCTCTCTGTTTTTCCCACGGTTGCGCACTTATCTGTAGCAGCCCCTCGCTG…
>Novel00977
TATTACTGGAATGTGCACCAGCTGAAGCTGATTGATTGAGTCTTTAAATAAATAAATAAATAAAAAGGCTGGTAAAATTAAACCTGTATCAGTGGTTGCAATCGAATGGTGGTCCACGTGATTCCCTGCAGGATGAGGCACCTAGCTAGCTGTTGGATTCCTGCACGAGGCCAAGAAGAAGCCGTGCGGACGATGCACCGAACGAATGCTCGCATGAAATTGAATGAACGCACACACAGGGAATGAAGGAAGGAAGCTCCGGTATTGATCCGCCGGCCGACTTCATCAGTCTGATCAACACTACACTATGATGAGTCTATGACATGAGTGGAGTGGAGGGACGGTGCACATGCATCTTGGGCAGTCTGCAGTGTGCAAGGACGAGAGCATGCGGTTTGC…
>Zm00001d048583
CTTTTTGCCTTTTCTCCTGCCCACCACCCCGCCACAACCCTTTCCCTTCTCTGCTTGCTTGCTGCTGCAGTGCTGCCTCCCCCTCGCCCAGCAGCAGGGAGCAGCCATGCCAGGGGACCACGGCTCCAAGGGCGACATCTCCTTCGCCGGACGCTTCACGGCCAGCGCCATCGCAGCATGCTTCGCAGAGATATGTACCATCCCGCTCGACACGGCCAAGGTCAGGCTCCAGCTGCAGAAGAACGTCGTCGCCGCCGCCGCCTCCGGGGACGCCGCGCCAGCGCTTCCCAAGTACCGCGGCCTGCTCGGAACTGCCGCCACCATCGCTAGGGAGGAAGGGGCCGCAGCGCTCTGGAAGGGCATCGTCCCGGGCCTCCACCGACAGTGCATCTACGGGGG…
>Zm00001d048635
CGAACTCTAGCCAAGCAACAGAGAGGGGGGGAGAGATGACAGGTGTGGAGCCAGCAATTATCGGTGCAATCGCTAACTTGGCGGCCCCGGTCCTGCCTATAGCCATTAAAGGGATACAAGGTGCACTGAAGAAACGGCAAGTCCGTGACAGTGATGTTGAAACCCTGAAATCCCAGCTTAGCTACATCCAGGGCATCATCCGTGATACTCGGAAGACTATCAGGAGTTCCCAAGACCCGTCCGACAGGCTTCAATCCTGGGCTGGATACCTCAGATGCTTGGCGTACGACATCGAAGACCTAATAGAAGGCCGCCGTGCCGGAACCATGACAGGTGCGAAGCTTAATGGCAAGATTACTATCATCCAGGATTTAATCAGATGTGTACAGTCCTATCCGG…
>Zm00001d048819
GCCCAACACCCCGCCAACTACCCCCAAGTTTGATCGAGCTCTCTCCACGCACCACCAGCATACTTGCAATGGCTTTCATCGTGCTCCTTGCTGCTGCAGCAGCGGCAATAGCCTTGGTTCTCCACCACCTCCTCAGTGCCCAAAAAAAGCGCAGCAGCAGGTCTGCAGGCTCGACGTCCTACAGCCTACCGCCCGGCGACCTCGGCGTCCCCGTCATCGGCCAGACCTTCTCCCTCCTCCACGCGCTGCGCAGCAACACGGACGACCAGTGGTTCAGGGCGCGGATCAAGAGGTACGGCCCGGTGTCCAAGATGTCGGTGCTGGGCTCGCCGACGGTGCTGCTGGCCGGGACGGAGGCCAACCACTTCATATTCACCAACCAGGGCCTCATCCTCACGC…
>Zm00001d048949
AGCAAGTAGCAGCTACATACGTCCTCCTCCATTAATATTGGCAGCAAGCTAGGATCATCAGCATCTGAGCTTATTATTACTAAATCGATCGGTTGCCATGGCGGGGATGAGAGTCGGCAAGCTGGCGCTGGCTGCGGTGCTGCTGTGCGCGGCGGCGGCCATGGCCACGGCGCAGCAGGCCTCCGGCGTGCGCGCCACCTACAACTTCTACAACCCGCAGCAGAACAACTGGGACCTCAACGCCGTGAGCGCGTACTGCGCGACGTGGGACGCCAGCAAGCCGCTGTCGTGGCGCATGAAGTACGGCTGGACGGCCTTCTGCGGGCCCGCCGGCCCCACCGGCCAGGCCGCGTGCGGGCAGTGTCTCCTGGTGACCAACACGGCGACGGGGGCGTCCAT…
>Zm00001d048950
AGCAAGTAGCAGCTACATACGTCGTCCTCCATTAATATTGGCAGCAAGCTAGGATCATCAGCATCTGAGCTTATATATTACTACATCGATCGGTTGCCAAATGGCGGGGATGACAGTCGGCAATAAGCTGGCGCTGGCTGCGGTGCTGCTGTGCGCGGCGGCGGCCATGGCCACGGCGCAGCAGGCCTCCGGCGTGCGCGCCACCTACAACTTCTACAACCCGCAGCAGAACAACTGGGACCTCAACGCCGTGAGCGCGTACTGCGCGACGTGGGACGCCAGCAAGCCGCTGTCGTGGCGCATGAAGTACGGCTGGACGGCCTTCTGCGGGCCCGCCGGCCCCACCGGCCAGGCCGCGTGCGGGCAGTGTCTTCTGGTGACTAACACTGCGACGGGGGC…
>Zm00001d048990
ATGCTACAGACTGCCAGGTTCCAGTGCTCCGTCGCCGCAGTCTTGTCGCGCCTACTCAGCGAGCTCCGCAAGGTCCTCATCAGGGCATCCGCGTTCTCTCCGTTCATAGCTTCCCTACCGACGTCGGCGGCGGCGTCGTCTCCACCCGCCGGCGTAATCTCCGCTATGACCCTCGCGTTGCGGATGAGGAAGACGCCTGCTGCTGCCTCAGACGTCGTCTCTATCCACGAGCAGCTGCTGCTGGTGGTGGCGCCTCCCGCCGCTGTTGCCGGTGCAGATTCGTCCAACGACGTTGTCGGTAGTTGTGGCCATGACGTAGCGGAGCCGGAGCAACAGGCTGAGAGCAAGAAGAAGAAGAAGAAGACAGCGTGGGCTGCGAGGAGGCGGCCCTCAAGGCTG…
>Zm00001d048991
ATGGAGATGGTGCTCGACAACAGCGCTCCGGGCGTCGTCGCGGCCGGGCAGTCGTACCGCGGCGTGAGGAAGAGGAAGTGGGGAAAGTGGGTGTCGGAGATAAGAGAGCCGGGCAAGAAGACGCGCATCTGGCTGGGCAGCTTCGAGTCTCCGGAGATGGCCGCGGTGGCGCACGACGTGGCGGCGCTGCGCCTGCGCGGGCGCGAGGCGCGGCTCAACTTCCCGGGCCTGGTCCACCGCTTCCGCCGCCCGGCCACCGCCGAGCCCGACGACGTCCGCGCCGCCGCGCTGGAGGCCGCGGCCCAGGTCCGGTTCAGGCCCGACCTCGTCGCAATGCAGGCCTCCGGCGGGGAGGGCGGCTGCTGCTTCGGCGGCGCCGGCGGCAGCGACGACACCGGC…
>Zm00001d049023
AGGCGTGCACACACCTGACGTTCTGCCTCCCACAGTCCCACCCGACATCCTCGCGCAGAACGCGTCGCTAATCTCGCGGTCGCGCCTCGGCCGATCCGCGCCTGCCTGCCGCCGCCCGCGATTGTAGCTCACCCCGACACCGCGCCCCCTCCTCTCCCCTGACGTGATGCCCGCCTCCCACCCCTTTCTCCGCATCGCACGGATCTAGCGCGGGAATTGCTCGGCCACGGCTCCGCACACCCTCCCTTCCCATGAGACGGAGCCGCCGTATCCTGCTCGCGAGGCAACGGAAGGGTACGTGATCCTCTGTCTACATGGAAGGTGAGGCAGATCGGGGGGAGAGTGGCTCGTGGCAGTCGCCTCGACGGCGTCCTTCGCGCCGTCCGGCGAGGTGTCGTC…
>Zm00001d049028
CGGCACTGCTTAGTTCTTTCCAAAGAGAGAAAGCAACAAAACAATCAGGGGTCCATCCATTTTTGTCAGCCATGACGAACGGCTACCTGTTCCGCGAGTACATCGGCGCGCAGTCCACCGGCGTCCAGTTCTCCGACGTGCCCATCAACGCCTTCGTTAGCTTCCACTTCATCCTCTCCTTCGCCATCGACTACACGCCCGTGGGGCAGCAGCCGAAGCCGGTGCCGACCAACGGGGTGTTCAGCCCGTTCTGGGACACGGGCAACCTGTCCCCCGCCGCCGTGGCCGCTATAAAGGCCTCGCACCCTAACGTCGCCGTCATGGCGGGGCTCGGCGGCGCCAGCGTGCTGGACATCGTCAATGCCGTCTTCACCCCGACCTCCGTCGACACGTGGGTGG…
>Zm00001d049059
GCGCCGCTACGGTCCAGGCGTTCTTGCTGCCTCCCTCGTAGACTAGACTCTAGACCACTATATATACAGTACTCGTCCCCGTTTTCTTCCTCACCAACTTCTCATCATCAGCCAAGTGTAAAGAGTGCGAAGAAGCAGTAGCAAAAGGATTCCATTCTCGTGTTCTTGGAGTGGTCCATCGATCGAGCTCCGTGAAAGAGAGAGAGAGAGAGCAAGCAATGGCGACAGCAGGGAAGGTGATCAAGTGCAGAGCCGCCGTGGCGTGGGAGGCCGGCAAACCGCTGTCCATCGAGGAGGTGGAGGTAGCGCCGCCGCAGGCCATGGAGGTGCGTATCAAGATCCTCTACACCGCGCTCTGCCACACCGACGTCTACTTCTGGGAGGCCAAGGGGCAAACCC…
>Zm00001d049109
ATGGCCGCCCCCGCCACCGGCCGCCCCCACCGCGGCCGCCCAAGCTCGCACCCGCTGCGGCTACCCCTAGCCCCGGCCCCGCCCGCCGCGGCCGCCCCCGCCCCTGGCCCCGCCAGGGGATCCACGCCGAGGACGACTACCCGTACCTCATGGAAGAAGGCTCCCCAAGTTGATGTCGTCACTATAACTGGGTACGAGGATGTCCTAGAGAACAGCGAGATCAGCCTGCTGAAAGCGTTGGCCCATCAGCCTGTCAGCATCGGCATAACTGCAGGGAGTAGGGACTTCCAGTTCTACAGAGGGGGGGTGTTTGACGGGGCCTGCAGCGTCGAGCTCCACCATGAGCTGACGGCCGTCGGGTACGGCTCGTCGTATGGCCAGAACTACATCACCATGAAG…
>Zm00001d049113
ACGGGTGCTCCAAACAACTGCACTAGACATCTCAATTAATTAGCTAATGAGCAAGCGGCTGAGCTGCACTCAAGACAAACTACCATGGATCAGTCAAACATTAGCAACAAGCACATGACGATGACAACCCTAATGCTCCTCCTCTGTGTCATAGCCATTGCAGATTGCATTTGCCACGCCGCAGTGGCAGCCCGGGTGGAGCCATCCACCACCGTCGGCAGAACTACAGGAGGAGACGAGGCGATGATGATGGCGAGGTACAAGAAGTGGATGGCGCAGTATCGCCGGAAGTACAAGGACGACGCCGAGAAAGCACACCGTTTCCAGGTATTCAAGGCGAACGCGGAGTTTATTGACAGGTCTAACGCTGGAGGAAAGAAGAAGTACGTCCTAGGGACC…
>Zm00001d049179
GTCATCAATCAAATACTCAGACAACCATGGGGCACCAGGCGCAGCACGGCACGGACGACACCGAGGAGCTGCTTGCAGCCCACCGGCAGCTGTGGTGCCATGCCCTGGGCTACGTCAAGTCCATGGCGCTCAAGTGCGCCCTGGACCTGCGCATCCCCGACACCATCGACCGCTGCGGCGGGAGCGCCACCCTGGGCGAGCTGCTCGCCGCAAGCGAGATCCCGGCGTCCAACCACGACTACCTCCGACGGGTCATGCGCACGCTGACAGCCATGCGCATCTTCGCGGTCAGCCACGACGACCCCGCCAAGGCCGACGACGCGGCCGCCATCTCTTACCAGCTCACCCCGGCGTCCCGGCTGCTCGTCAGCAGCAGCAGCAGCAGCGTCGACGCCGCCG…
>Zm00001d049289
CAGCCCTGCCAGCCGCCTAGCCATCCTCAGTCGGCAGCCGCTACAATGTCACCCAGACTCCAGACTCCGGCCAGAGTCCAGAGCCGCCAGGACGCCAGGTACGCCGCCGGGCGCCGGCCCCCTCCTCCCTCTTCTCGCCGGAGGAAATGGAGCCACTCGCTCTCCCCTCGGGCTCCTCGCACCCGACCCGCCCGCAGCCGCAGCCGTAGCCGCACCCGCTCCTCCACCATCTCCCGTCCAACAGGTTCCGGGATCAGCTTTTGTGGCAGGCGTCCGGATGGGTTTACTGTTCTTGCTCAAATCCGTGTGGATTTTGCATGGCCCCGTCCCGAAAATGCCACAGGCCAGCCGGTTCGGAAACCGTACCGCACGACGCCGTCGCCACGCTCCTCCTGGGGA…
>Zm00001d049441
ACCTTCCCGGCTCCTTTACTCGCCGGAGGCGAACCAGAACTCGTGCCACCTCCTCCTGTTCCTTGCCATCTCCGAATTCCCATCTGAAATTCCAAGGGCCGCGCCGTGCAATCGAGGCTCTCCCCGCTCACCATATATCGGAGGCTCCGCCCCCGCGCCTCGAATCCTTCGCGAGAGGTGCTGTTGTTTGCCGTGATTTGAGCCGGGTGGAGGTGTCTCGCTTCTTGATCTTGAGAGGTGTTCCTGGTTGATTGTTGGGAGCGAAGAAGGCATGATACCTTCTGTGAGGATCTCTCCTGGCTATGCAGCCTTCTCTGGCTCCAGCCTACGCTTAAAATTACATTCAATTCCATCCATCTCTAGTCTCAAACCCTCCAAATATGTGGTCTCCTCGCTGAA…
>Zm00001d049541
GTCGCATCGCACGCCATCAGCAGCTAGCGCGCTCCTCGAGCCCAGCAGAGAAAGGCCGGCCTACCCACTCTCTCTCTCTCTCTCTCCAGTCTCCACCGGCAGCGCTAATCGTAATAGCCATGGGCTCCACCGCCGGCGACGTGGCCGCGGTGGTGGACGAGGAGGCGTGCATGTACGCGATGCAGCTGGCGTCGTCGTCCATCCTGCCCATGACGCTGAAGAACGCCATCGAGCTGGGCCTGCTGGAGGTGCTGCAGAAGGAGGCCGGCGGCGGCAAGGCGGCGCTGGCGCCCGAGGAGGTGGTGGCGCGGATGCCCGCGGCGCCCGGCGACCCCGCCGCCGCGGCGGCCATGGTGGACCGCATGCTCCGCCTGCTCGCCTCCTACGACGTCGTCCGGT…
>Zm00001d049571
CACAAACCAAATCACCAGGACACAAGTCACCAACCTACCTCCTCCCCTCCCACCGCGGGCTCCCGTGCGTCTGCCACGGTGCCACCCGCTCCCGCGACATCTATAGACAGAGCAGCCGTTCTAGAAAGCATAGTAGGAGAGAGATGAGCGAGGAGGAGAGGAAAGGAGGGGGCGGAGGAGGGGACGACGGAGCGGCGGCGGCCGCGCGAGCGGCGGAGCAGGCGCGGGAGCTGCAGGACGCGGCGGCGGCGCTGCTGACGCGCACGCGGGCGGAGGAGGAGGCGCTGCGCCGGCGCGCCGCCGCGCTGCAGGGGGAGCTAAGGCGGCTACGCGAGGCCGCCGCGGCGCACGCGGACAGCGAAAAGGTTGAGGAGGACTTGGATCGAGCAACGTGCCTCA…
>Zm00001d049640
GTCCATCTCCCCTGCCTGCACCAATTCCTGAGGCACCAACCAAGCCTCTCTTGTTGACTCCGACGCCGATCGAACGTACAGACGGCCATGGAGACCCAAGCGCCGGAGAAGGAGAACTACCTCCCTGAAAAGGATGCGAGGAGCGCACGGGAGAAGGCCATCGACGAGTGGCTCCCGATCACCTCGTCGCGGAACGCCAAGTGGTGGTACTCCGCCTTCCACAATGTCACCGCCATGGTCGGCGCCGGCGTGCTCAGCCTTCCCTACGCCTTGTCCGAGCTCGGCTGGGGCCCTGGCATCGCCGTGCTGGTGGTGTCGTGGGTGATCACGCTGTACACGCTGTGGCAGATGGTGGAGATGCACGAGATGGTGCCCGGAAAGCGGTTCGACCGGTACCAC…
>Zm00001d049676
GGACCAACAGCCGCACCAGCATGGCGCAGCGGGACGAGGCCATCCGCCGCACCGTCTACGTCTCCGACATCGATCACCAGGTCCCGATCCATTTCCTCCCCCTCACCCCGTGTCGTGTCAAGTCGCGCCGGTGGGGAATTTTCCCTTCTTCCGCTAGCAGGCCTACCCACCGATATCGATGGATCGATCGATCTTTGATGCCAATTTGTTATTTTCTTTCTCGTCGCACTACCCGGGATGATTTACTCGGTTAGATTTTGGGGTTCTGTCCGTGCGCCCTCTCGGGCAAAAAGGGTGAGATCACGAGATCGGATAGTGTTTTGTCATGAGCGATATGGCACGGGGAGCAGGTTGGGAAGTAGCATACGGCCACTACGCAGTAGAGGCATGGGCCTTGCC…
>Zm00001d049743
CCTCATCATCACTCCATGATCTAATCGAACAACGCACGCACGCAGCGCCGGCGTCGCCCACGGCACATCCATTGCTCAGTCCACTCCGCCGTCCACCTTGAAGTCGTCTTTACTCTTCCCGATCCGTCAGCCACCGATTGGTCGTCAGGAGGCGGCGATGGCGTCCCAGGACGACGGGTGGGGAGGCGGCGAGGACGGCAGCTCGCTCTTCGAGGGCATGGTCCTCTTCGCGCCAGAACCCGCCGCCGCCGAGGACTCGGTCCCTACCCCCGCCCCTGTCCCTGAGCTGACATCCGCCGCTCGCCCCGACGCCGACGCGGCTTCGTCCGCGCCGCCGCCGCTCGACGAGGACCTCTTTTCCGACCTCACCCTCCTCGCTCCGCAGGAGCCGCTCTCGCT…
>Zm00001d049805
AAGGATTACAAAGTGAGGAAAGAGCTCTGAAAAGTGATGGCTGTCCCACAAGTTGACAAGAAAATGCTTGGTGAACTTGAAGCCATGGGATTCCCAACTGCACGTTCAGTTAGGGCACTCCATTTTTCAGGTAATTCCAATCTTGAATCTGCTGTAAACTGGCTTCTGGAACATGAAAGTGACCCAGATATTGATCGGCTACCACTGATTCCAAGAGAAATAAGCATTGAATGCGGTGACACATCAGATGAAGTAAGAAATGACGTTGAAGGAATGAGGGATACTGTGCAGGAGCAGAAACCTAAAGAACACACTGAAACTGGGAGACAGAATGAGACATCCCAGTTGGAACGAGAACCAAATGCAGATGGACAGGAGGAAGAAGATAGAAAGAGGATA…
>Zm00001d049821
GACGAGAAAGGAATCACTCGTTTTCCTCCGGGCACATTCCTCCGAGTTCGGACGGCAACGCCTTTTATGGCCGCCGTTGCCTCCTCCTTCTCGCGGTTCTCCTTCCGCTGCGCCGTCTGCCCCTCCCCGCTCCGCGTCCGCTTTTCGCAGCCCCATCCGCCCGCGCGGCTCCGCGTCTCCTCCACCGTCGTTGCTCTCCACAAGCGCAACCCCAAGCGGCTCAAGTACGCCGCCGAGCGCCAGTTCACGAGAGGGGATGCCGGGTTGCTGCGGGTGGAGGTGGAGCCCTCCGGCGGGGACTTCTGGAAGCTTGACCCCATTATCGACCTCATCAATCGCGGCGCCGTCGGGGTGATCCCTACTGACACCGTCCTTGAGCTTTTACAAGTTACAACCACT…
>Zm00001d049966
ATGGATGCAGATGGCAGGGAAGGTTGGCCAGAACTGGCACCCTATGAAGCCATCCATGTTGGAGCTGCAGCACCGCAGATCCCCGAGGCGCTGATCGAGCAGCTGAAGCCCGGCGGCAGAATGGTGATCCCTGTCGGGACAGTCTTCCAGGAGCTGAAGGTTGTGGACAAGAAGTTGGATGGCACTGTCAGCATAAGAGACGAAACGTCTGTGCGCTATGTGCCGCTCACTAGCAAGGACGCCCAGTTGCACGCAAGCTGA
>Zm00001d050062
GAGGCTGGCATTTGGACCTTGCCGGAGTATAGGATGCGTGGTCGGTTCTGTGAGGATCTGAGGGGCTGAATTTGTTGTTTCACATCGTGGCTAGAGTCGAGCGGTGCTGAGTTGTTGAGTTAAAGTAGTCATTTATAATTATGTGATACATCCACAGTTTTTGCTGTTGACCAGTGGGCCATATTGGCATAGTAGGAGTTTACTGTTTTGATTTTTCTAGGTATCGCACCTCTTCACTTTCCCCATCCCCTTATGGAAGGCGTGAGATAGAGTGTCGAACGGAGCTTCCCACGACGATGCTGCTGTTTGCCGGCGAGCTCTCCCCCCTACCCATTTCTTCTACTCCTTTAGAGCTGCCTACAGAGAGAAGGTGCTAATTGAAGCAGAGAAACAGTTTCA…
>Zm00001d050074
AGTGTGCTCCGGGTCGAGCAGTTTCCGCCTGTACTACTTCCTGTTGTGTGTTGCTTGTTGTTTGACCCCGAGCAACCGCCGTCCGCCGCTACCGTTCGTTCCGTTCCTGCCGTCTGGTCTGTTGCCCTCGCATTTTCTTTGCCCGCATCTGCAGCGCGGGCTCTCAAATTTGGAGAGTGTGCTTCAGCAACGAAGCAGAACCGATGGCTGTTTGAGTTGTAGCCCACTGAAATGAGCTTTCCTGGGTGCCGATTCCGCCCAGGAATGTTTCTGCGGTGCCTAGGAAGCTTCTTAGGTCTTCGCTTGTTAGGTAGGACTCATTCGGCTTCGGAGGAGGAGCAATTGCAATCGAGGTGCCCGTTTTTTTTAAATAAAAAAAATCGAGGTTCTCATCAGCCC…
>Zm00001d050158
AACAAGCTGATGATGCTCCATTTTCAACTTATTCTGATTATGAATCAGTTATTTGTGGCAAGCAACCAAACAACAATTTTTTATATTCTATTGTTCTCAAACTGTGCTATGTGTGTAATTCATTTAAATCCATTAACAATCCTCTGCATCATTAACTGTGCATCCAGTTTTAGTTCCAAACCATGAAGCTGAAACAATTTGCTTCTTCATAGTGGTTGGTGCAAGGTTATTCTTCACTGCGACGGCAACGCCAAGAGCGAACTTGGAGGTGTTGCCGCTCTGCACACCCCTTGTTCTTCTAGCAGTTGAACTTTGCTACTTGAAGCTGCAAAATTAACTTCGACAGCAACAAGGCTAGAAGGTTTTGATGGAACCGGTCATATTGAACCGAGAAAGAGA…
>Zm00001d050161
GATATACCAAAGTAACTCATAATCCAATGGCCATCGTCTTTCAGAATGTATCCTGTTCTTGGTCTAGCAGTTCTGTTGCTGAGCTGAACATAGTTCTCAGAGATATATCTTTGCAGCTACAAAAAGGGCTCTTTATTGCAATTGTAGGCGAGGTAACCTTTTCCTCAACGAACATAGGTATTTGCAAGAATCTCATCACTTGCACAGAAGCCAGATGCTCTTCAGAAAGGGATTAGCCCAAGTGATGCTGCATTCACACTGGGAATTGCTCCAGCTTTAGCAAAGGAACATCTTCTAAATGCATAAAACAAAGGCCTGTTGTGCAGAGATGTTAGTTCAGATGGATTCCGCTTTTTTAACAATTTATTTAATGACATTGATCCCCAAAATATTCACTCG…
>Zm00001d050247
ATGGCTGAAGCCGTGGAGAGCGGCGGGCGGGCGCTCCTGGTCTCGGAGTTGGGCCGCGTGCAGGACCTGGTGAGCCAGCTCGAGCTGCAGCTGCGCGCGCCCGCGGACGCGGACTCCGTCGACCTCTGCCGCTGCCTCGTGCAACAGATCGTCGCGCTCACCGACCGCTCCATCGGCATGCTCCACTCGTCACCGGACCTCGCCCCCTCGCCGCTGACCGCCACGGGGAGCCCGATAAGCAGTGACGCCGCCTCCGACCACCACCCCTTCCGCCCCGCCGGCGCCAGCCCCAAGAAGCGCAAGGCCACGGCGCGCTGGACCAGCCAGCAGGTGCGCGTCAGCGCCGACGACGGCCACAGCTGGCGCAAGTACGGCCAGAAGGACATCCTCGGCGCCAGG…
>Zm00001d050250
ATGTGTTTCCTACCATCTCGAGTGCCTGACAGCGGGAAGCCTGGGGACAAGGTGGGTGACTCCGCGTACTACCGCTCGTTGGAGAAGGATCTGGATGCCAACGAGCTGTTTGGCCGAGTACAGGAGATCCGATCTGGACGCCAGCGCTACCCTCTCCAGTCCCCACAAACGGCCTCCGGCCTTCACTGGCAACACGGTGGCTCCGACAACACCACCTTCATGCCAAACATATGCAGATCAAGTTGCTTATGTCCTCAATTTTTTTCAGGTAGCCTATTATGTCCCGCCGTGAGATCAGTTCTCGCAGAGGTTCTTCAAGGATTCTTCAAAGTTGCTCGATTTTTTTTCAGGTTGCAGAGATTAATTCAGCACGTGCTCGACCTCGGGGAGAACCTGCTC…
>Zm00001d050462
ATGGAGCACAGCTGCAAGTTCGGCCCGGACGGCGGCTACGACAGCAGCAGCAGCGGTGGCAGCAGCCCGCCGGCGTCCCCGCGCTCCGGACCCTCGGACAGCGACGGCTCCAGCAGCAGCAACGCCGACGAGGTCGACCGCGGCACTAGCCGCCAACTGGTGACTGTGTCGGAGTCGTCCGCCTGCGTGCTGCACGACATCGACAGGCACCAGCAGCGCATGCTCGCCCTCCTCCCAGCCTTCTCCCCTCCCGCAAGAGCCGGCGCGCGCGCGGACGCCTTGTCTCGCTGGCTCGCCGGGTTCGACGCCGGCTGGGTTCTGGACGTGGGCGCGTTGGACGGGGGCCGCGATGGTGGTGGTCTCTTGTCACGGCGGGAGGTCGGGAGGAGGGTCAAGGCG…
>Zm00001d050466
ATGGCAGAATTTTTCAAAAAGAATGGAGGCCCTACATTAGAGAAAGCAAAAATAATAAAGATTTACAGAAAGGAGGAGCTGACCCCAATCTTGACACGAAGTAATTTTATTGGACGTGGTGCTTTTGGTGAAGTTTACAAGGGCCTGCTTGACAATCAGTTAGTTGCAGTAAAGAAGCCAATTGATGGCAATGTAGCACAGAATGATCAATTTGCCAATGAAGTCATTATTCAATCACAAGTGATCCACAAAAACATTGTTAAGCTAATAGGTTGTTGCCTAGAAGTTGATAAACCAATGCTTGTGTATGAGTATCTCTCCAAAGGGAGCCTGGATGATATTCTTCACGGAAGCAGTGGCGTTCTATTAACTTTGGAGCAACGTTTAAATATTGCTGCA…
>Zm00001d050635
ATGGCGAACCCCCACGTCTTCTTCGACATGACCGTCGGCGGTGCCCCAGCCGGCCGGATCGTGATGGAGCTGTACGCCAACGAGGTGCCCAAGACCGCGGAGAACTTCCGCGCGCTGTGCACGGGCGAGAAGGGCGTGGGCAAGTCCGGGAAGCCGCTCCACTACAAGGGCTCTACCTTCCACCGCGTCATCCCCCAGTTCATGTGCCAGGGCGGCGACTTCACCCGCGGCAACGGCACCGGCGGCGAGTCCATCTACGGCGAGAAGTTCCCCGACGAGAAGTTCGTCCGCAAGCACACCGGCCCCGGGGTGCTCTCCATGGCCAACGCCGGCCCCAACACCAACGGCTCTCAATTCTTCATCTGCACCGTGGAGACCCCCTGGCTGGATGGCAAGCAC…
>Zm00001d050712
ATGCCGGCGAGCGTGCCGCTGTGTCTGGGCCTGGACACGGCGGGGGTGCAGGTGCCGTGGTACTTCCGGTGCCCCATCTCCCTGGAGCTGATGCGCGACCCCGTGACGGTGTCGACGGGGCAGACCTACGACCGCAGCAGCATCGAGTCATGGGTGGCCACCGGCAACACCAGCTGCCCCGTGACGCGCGCGCCGCTCGCCGACTTCACGCTGATCCCAAACCACACCCTCCGCCGGCTCATCCAGGAGTGGTGCGTGGCGCACCGCTCCATGGGCGTGGAGCGCATCCCCACGCCCAAGCAGCCCGCCGACCCGGACCTGGTGCGCTCCCTCGTCGCGCAGGGCCCGGGGCTCCCGGCGCTGCGGAGGCTCAGGGCGCTAGCCAGGGAGTCCGACAAG…
>Zm00001d050775
ATGACGGCGCCCAAGCCCGGCGGGGGAGCGGTGGCAGCGGCGCGGGCGGCGGCGGCGGGGCCCAGGACGGTGCTCATCACGGGGGTGAGCAGGGGGCTGGGCCAGGCCCTGGCGCTCGAGCTGGCGCGTCGCGGGCACGCGGTGGTCGGTTGTGGCCGTTCCGCCGAGCAGCTCCGCTCCCTCGAGGTAGAGATCACATCACCATCGCGCCACTTCCTTACTGTTGCCGATGTCAGATCTGACAGCAGTATGTCCGAGCTGGCAAAGGCTGTTTTGGAAAAGAAGCAAGTTCCAGATATTATAGTAAACAATGCTGGTACAATAAACAAGAATAACAAGACATGGAATGTTCCAGTGGAAGATTTTGATATGGTGGTTGATACAAATATCAAGGGGACA…
>Zm00001d050864
ATGGCGTCCATGATGGGAGGAGACTTGGTGGAGGCGTACGTGCTCAAGAACGCGTGCAAGGAGAAGCTCCGGCGCATGGAGGCGGCGGCGGCGGCGGCCGACGATAAGACGAGCAAGCAGGGCCGCCTCGCGGAGAAGAAGGTCTCAGGCAGAGGACGACGCCTGCTTGGGCTCCTGAAGAAGAAGGTGCACCCAAAAGCGGCCGCGTCGTCGTCGCCACCCGAAAGCGGCGCTGAAGAAGCAGCCTCGTCTTCTTGA
>Zm00001d050909
ATGGCGTCCGGTGGTAGGACCATGGAGAGCGTGCGGTGGGGAGAGTTATCGAGTGGCCTGCGTAGGAGGAAGACGCGCGGCCATGGACGACCGGAAGTGGAAAGCAGGGGCACAGCGAGCTTGAGGGAGCGAGCTAAGGTGGCGCGACATGGGAGCAGGCGCGCGCGTAGGGAGGCTTTGGCCGGGCGCCGTTGGAGATGGGCGCGCTGGAAACGGCCGAGAAGGAGGAATCCGAGCGCCGTCCAGGGAGCAGGCGCGGTGGCCATGGCGAGCACAGGGAGCTCCGGGGGAAAAGCCGCGGTCCGAGCAGGGAACGGGAGGAACACCGACGAGCCTGCGATGCCAGGGAGCAGGGCGCGAGCTCAGCCGGAACTAGGGAGCAGGACAAGGGCAGACGGC…
>Zm00001d050917
GACCCTGATGCCACTTCCTCTTGTATCACACACAGACACAGCTCAGCAGCAGCAGTATCGCCCCGCCACCCGGTGCTTTTGTCTCTCTCTCGCTGGGTCTTAAAAATCCAACGCCAACGCGGCCGCCGGATGCGCATTGCCCCCCTCCTCCCTGTCTCGTCTCCTCGTCGTGGCCACCTCTTCCTCTGCTCCCCCTTCCAGGGGTCGTTCTTGGAGCCCCAGTTCCTCGAGCTGCGTCCGCCGGTGGTCGCGTAGGTGGCGGATGCCCGCAATGGGGAGGAGCAGCCGCGCCTGCTCCCTTCTTGGTTCAACTCACCTGCTCCTCCTGCTGCTGCTCTCGGTCGGCTCCGCCGTCGCCCAGAATGGCTCTACCTGGAAGACCCTGAGCGGCAAGGCTCC…
>Zm00001d050944
GCTCCGAGTCCTGCCCGACTGCTCCACAGGCCACTCGTCACCCCAAACCAAAACGAAGCTGCGGGCCTGCGGCGGCAGCAACAGAGAGCAGAGATGCTGCAATTCCCGGCGCTGATGCGGCAGTGGCCATCGCCGCCGCTGATCCCGGCGTCCACGCTGCTCCCCGTGCCGGCCACCTCCCAGGAGGACGAGGTCCTCCTCGCCATGGCCGAGTCCGACCTCGAGGACAAGTTGAATGAGATCCGGAAGACCAACAGCCACCTGATTATCATCGGGAAGCCCACAGGCGACACCAAGGAGGAGTATGACGCTGAGGTGGAGGACGACGATGCAGACAACGTCGAGGAGTCTGATGGCGATGACTTCGACCAGGAGACTGGTTGACCCAGGCGGCTCCCC…
>Zm00001d051015
GACGCCGTTCCCACGTTGTCCTCTGTTCCATCCCCGTTCGTTCCACGAACCAAACCAAACACGCTCCACAAAAAGAGGTCAGTGTGGACGCTTGACCGCGAAAATTATATAGACTTCTACTCGGCTGCATCTTTGCTCCGGTCGATGCACGACAAGAGGAGAATGGGGACGGAGGCCGACGCCGCAGCCGTGGACCTACTCCGGTCGCAGATCCCGTTCCAGACCGACGGGGAGTTCGTTCTCCCGCCGCGCGGCGTCGGGCTCGTCCTCGTCGACCTCTGCAACGGCTTCTGCACCGTCGGCGCCGGGAACCTCGCTCCTGTTGCACCAAACAAGCAGATCAGTAAGATGGTGGAAGAGGCCGCGAGGCTCTCTAAGCTGTTCTGTGATAGAAACCTA…
>Zm00001d051016
ACACCAGAAAAGCTTTTCTGCCTCCTCTCCACCTTGCTTCCCGCAACTACCACGCACGCCGAATACTTGGCAAGAAGAAACCCTTTCTCGTCCCGTTGAACTGGCGCCGTCGACTCCACCGGGGCACGCTGTCGCGGGTTGCTCTCCGGTCCTCGTTCTCCTTGCTGCTGAATCCGCTAGTGGAGATCGACCTGATTTCTCCTGTCCTGGTAAACCCTAGCGCTCTCCCCCTCCATTCCTTCCTTTTTTTTTTGCCGTCATTCGCTGTGATGTGAACCACTGAAGCGAAAGCCTAACGTACTTCGGTCCGTTTGGTCTATTCTTGGGATGCCCTGTATGTGGATTTGTTCGCTGTTCCGAGCTTAGCCCTCCGTGGCCCTTCTCTTCTTGAGGGCACAC…
>Zm00001d051055
ATGGGCCAGAAGAGCCGCGGTTTTCGGACGCTGGGCTCCGGTCTTTCTCGCCTCCTTCTCAGCCTTCAGGGGCGGCTCGCGGAAGCCATCGTGGTTGACCCGACCAGCAGCCGAGTGCCCGATTACAATCAGCCATCGCCACCACCTCCCTCCGCGGCTCCGCCTTCCGCCGCGAACACGCCGCTGTCTCGACCCCTTGTCCTCCTCCTTCAGCAAGATGGCGGAGGTGAGGAGACCCTTCCGCTCCGTCTGCTGATTGAGATAAAAACAGCACCTGCTGACTTCCGCTTCCCTACAACAAACCAAACAAGGCATTGTTTTACTCGCTATGTCGAGTACCACAGGTGTTTGAATGCCAAAGGGGATGATGCTGGTGTTTGCGAAAAATTTGCCAAGTAC…
>Zm00001d051104
GTGACGGAGAACAAGGATTTTATAGAAAGGAAAAGAGAGGTTGTATCCTTTTCACCAAATGATAAGGCGTCAGTTGATAGCTTCCTTCAGGTAGGATTTGCCCAGTTGGTGGAATGTTCCTCCTTTTGTAGTCAATTGCTTCACATTTACTATTCAACATCTGGCCTGCTGACCCCGCATGCAGCCGCCCCGCAATCTCCGCTGCCGAGCACAGCCGCCCCACAGTCCCGCAATTCCGCCACCTGCATTCACCGCGCCATCGCGGCCGCAGTCCCCTCCCCGCGCCCGCAGTTCCCGGTCCACCCCGCAGTCCACGCCGCCGAGCACAGCTTCCCATTGCGCCCACAATCCCCTCCCCGCGCCCGCAGTTCCCGCCCCGCCCCGCAGTCCACGCCGTCG…
>Zm00001d051130
TATAGAGGACTCTCCGCCGGCACGGTCACTTGAACCAGTAGCCGAGTACAACGCCACACGCTCGTCACCAGGAGGCCGCCAACCGGCACCATGGGCGCGGGCAACAACAAGCGGGGACACCCTCTCCTGAGGGGTGGGAGCGCGAAGAGGGAGCGGTACACGCACGGCTTCTCGGCGTCCCAGATGGCCGCGCTCACCGCCCTCTGCGGCGCGCTGGTGCCGTCCCTGCCGCCGGCGGACCGCCGGAACGGTCACCACCACAACCCGCAGCCTGAGGAGGACGGCGGCAGCAGCAAGGTCGTGGAGGAGTTCCTCCTCGCGTCGGCCGCCGACCCGCCCGTGCCCGGCGAGGTGGCCGAGCTGATGTCGCGCAAGTGCCTCCCCGAGGCGCTGGCTCTG…
>Zm00001d051166
ATGGAGTGCGACAACGGCCGCGTCGCTGCTACCAACGGCGACTCCCTGTGCATGGCGCTGCCCCGCGCCGCCGACCCGCTTAACTGGGGGAAGGCGGCGGAGGAGATGATGGGCAGCCACCTCGACGAGGTGAAGCGGATGGTGGCCGAGTACCGCCAGCCCCTGGTGAAGATCGAGGGCGCCAGCCTCCGCATCGCGCAGGTGGCCGCTGTCGCCGCCGGCGCGGGCGAGGCCCGGGTCGAGCTCGACGAGTCCGCCCGCGGCCGGGTCAAGGCGAGCAGCGACTGGGTCAGGGACAGCATGATGAACGGCACCGACAGCTACGGCGTCACCACCGGCTTCGGCGCCACCTCCCACCGCCGCACCAAGGAGGGCGGCGCTCTCCAGAGGGAGCTCATC…
>Zm00001d051174
TCTCCGGCCTCACAACACACAACAAGCAAAGCGAAGCGCGCGCACAGAGATCTAGCTGAGCTACTAGCTATAGCAGCAGCTGCTGCAGGTCTCCTGACATGGCGAAGCAGGACATCGAAGCATCGGGGCCCGAGGCCGGCGAGTTCTCGGCCAAGGACTACACGGACCCTCCGCCGGCGCCGCTCATCGACGCGGATGAGCTCACCAAGTGGTCCCTCTACCGCGCGGTCATCGCCGAGTTCATCGCCACGCTGCTCTTCCTCTACATCACCGTGGCCACCGTCATCGGGTACAAGCACCAGACGGACGCGGCGGCGTCGGGCCCCGACGCGGCGTGCGGCGGCGTGGGCATCCTCGGCATCGCGTGGGCCTTCGGCGGCATGATCTTCATCCTCGTCT…
>Zm00001d051194
ATGGATAAGAACTACGGTGAACTCTACAACATCCTCGGATGGGGTGAGGAGTACTTCGCGGTGAACACGGAGGGGCACCTCAGCGTGAAGCCTTTCGGCCGCTGGACGGAGCCCGGGCAGGAGATCGACGTGCACTCGGTCATCGTGGAAGCTCTAGCGACCCAACCCAACGACAGCACCAGCAAATCTCAGTTCCCCATGATCCTTCGCTTCCCCGACGTGCTCAAGAACCGTATCGAGACGCTCCATAACGCATTCAACAGCGCCATGGAGTCCACCGGGTACACGTCCAGGTACCAAGGCGTGTTCCCGATCAAGGTGAACCAGAACAAGCACGTCGTGCAGGACATGGTTAGGTTCGGCCAGCAATGGAACTATGGGCTCGAGGCTGGCTCCAAG…
>Zm00001d051214
GCTCAGGGTCCACTACTGATCCGCTCCACGCGAGCTCCCTTGTCCCCGCGTCACACTCGCGCCCAAGCAAGCGGTTGCTGCAAAGGAAGCCTCCCCTGATGGCTCTCGTGACCTCGGGCTCGGGTGCCGACCAGGTGATCGCCGAGGTGGCGATGAACGGCGGCGCCGACCCAAGTGCAACCACCGTGCGTGCTACTGTCGTGCAGGCGTCCACCATCTTCCACGACACGCCCGCCACTCTTGGTGAGCACGCGCTCGTGTTCCAACCCCCTTCTCTGTTCTACGACTGCTATTCCGTCCGTGCGCGCCTACTCAAGTTGTTCGTCTGATTGCCTCTTACGCGCGCACGGAACTGGGATATGACGGCGCGCCGCCGAATTGTGGCGCTCCTCGCCCAGT…
>Zm00001d051252
ATGGTTCTTGTGTGCACTTACATCAATAAGGATGTTTCAGTTTCATTTTCCTTATATCATGTAAGTTCACTTTCAGGTGCTGGGTTCCTAGCAAAAGATCTTGGTTTGTTGGTTGAAAATGATACAGAGGAACAACTTGGCACAGCAAGGAAAGTCACGATACATCAAACTACAACAACCCTCATAGTAGATGCAGCCAGTAAAGATGAGATCCAGGCGAGGATTGCACAACTGAAGAAGGAGCTTGCTGAGACTGATTCAGTTTATGATACTGAGAAATTGGCTAAGAGAATTGCTAAGCTTGCCGGTGGTGTTGCTATTATCAAGGTTGGAGCTGCAACTGAGACTGAGCTTGAGGACCGCCAACTAAGAATTGAGGATGCAAAAAATGCCACTTTT…
>Zm00001d051323
ACGCTTCCATTTACCTCCGTCCCTATCAGCTTCCTCGCTTCCCTATGCCTACGAGAAAGAGAGAAGCGTGGGCTAATTCCTCTGTGTTTCCCAGCTTCCTGTTCACCATGGACTCGAGGGAGTGCATCGTCCCGTCAAACAATCCTGCTCCAATCTTTTGACGTCTTCGCTGGGCCTGTGCCGCCTCCCCGTACCCGCCGTTCCTGCACCGTCAAACCGCCAGCCAAGAGTCCATTTTTTTTTCTTATCAAAAGTTTGCGTTTGATCGGTTTCGTTTCTAAGAGCTGCGCGAGATGTCCTTGTTCCGGGAAGGGAGGAAACGAGAGGCTCTGTTCCTGTCGCGATTGTTGGAGGACCTCACCATAGTTTGAGGCGGTGAGGTGGAGGCGATAGAGAAGA…
>Zm00001d051362
GGACGCTCTCCACAAAAAAAAAAAAGTTCAGACTAGCGACAGACACATCTGAACGAAGTTTTGGTGCGCGCGCCTGCTCTCGGCCGGACAAGCTAGCTATATAGTAGCAAGTAGCCAGTACCAATCATGCATGGAATAAAATGTTTTGTGACGATTATCCCCGCACCGTCCAGAGTACTCTAACCCACAAGTTGAGGCCGCCCTGCAGCCCATCAGACGAGGACGCGCGCGTGTATAAAAGCTGACTGGACTCCCAGCGTCTGTCAGCGAAGCCGAAGCAGCAGCCAATTCGCTCGAGTTCAGATCGAGCGCGCGCCAAGCAAGTCTTCCGGCCGGCCGCGAAGAGCGCAATCAAGCAAGACAAGATGGTGAAGCTCGCCTTCGGAAGCGTCGGCGACT…
>Zm00001d051374
ATGGCGTCCAATTCCGCGGCCCCGGCTGCCGCCGACGGGGGCGACGACCTCGACCAGCTCCTCGACAGCGCGCTCGACGACTTCACCAGCCTCGACCTCTCCGCATCTGCCGCCCCCAAAAGCGCCGGTGAGGCATCGGGGTCAGGATCGGGAGGCAAGGGGCCGGTGAAGGGGCTGGGGCTGGGGCTTCCGGACCCCAAGGTGCCGAAGCGGCGCGCGGGGAAGCAGCCACCGCCGAGGGGCGCGTGCGCCAAAGAGGCGCTTGAGGAGCTGACGCGCGAGACGCGGGAGGCTGTGCGCGAGCTCGAGACGGCCACTGGGGGTGTTCCGTCACTGGACGATGACGCCATGATGGAGGAGTTCGTCAAACAGTTCGAGGAGTTCGCAGGGGCACAGGCA…
>Zm00001d051424
CGACCGAGCTAAAGGGCGAAAGAGAGAGAGAGAGAGAGAGAGCAGTGTGCTTGTGGTGGCCATGGGCAACTGCTTTGGCTCCAACGTGGCGGAGGTGGGGGCCGTCAAGGCGATGGCGCAAGCCCATCACGCGCACCCGCAAGTGGCGCTGGCGAAGCACGTCGTCATGTCCGCCGCGCCGTCCAGTGCTGCCCAATCCCATCACGCCGCGGCGAGGCACCAGGGGGTGCCCGTGCCCGTGCCCGGGAAGTTGCCGCCGCCGGCCACGGCCACGGCCACGGGAGGCGCCGGCGGCAGCAGGCCCCCAGCAGCTGCGGGCGGGGGCAGCGATCGTCAGCCGGACGGGAGGATCCTGGAGGCTCCCAACCTCCGTGTGTTCACGTTCGCGGAGCTCAAGGC…
>Zm00001d051480
AAATCTGCCCCTACGTGAAACGTTCCCCTCCTCTCCTCGCCCTCCTTGCGCAGGTTGAGGCCCGAGGTGTAGTGCAAGGTGGCGACCTCTCGGCGGCTTGGGTCGGATTGTTTTCGGGAAGTTTGGTCTCCAGTGACCCGAGCACTGGAGATGCCCTGTTTGGAGGTAACATCTACGATCTCGCGTTGCTTGTATTGTTTTCCTGGCCCGGCTGGGAGAAAGATCGTATCGAGGTTGAAATTCACTCGAGCCGAAGCCCCCGATTGGTTTGAATGGTGTAATCGCCTTCTTGTCGGGGAGGGGGGGTCTGAATCGTGGATCGATGTTTCCTCTGCTTCCCGCAGCAAATTCCGATGGCGACCGGCGAGACCGCCGTGGATCGTCGCGAGGACCCCCGCG…
>Zm00001d051501
ATGGCGCGGATACTCCTCGAAGCGGCGGCCGGCTCGGGCCCGCCGACGGACTCCATCAACTCGGACATGATCCTGATCCTCGCCGGCCTGCTCTGCGCGCTCGTCTGCGTCCTCGGGCTGGGTCTCGTGGCCCGGTGCGCGTGCTCGTGGCGCTGGGCCGCCGCGTCCCGGTCGCAGCCGGCGGCGGACGCCACCAAGGCCGCCAACAGGGGCGTGAAGAAGGAGGTGCTGCGCTCGCTCCCGACGGTCACGTACGTCCCCGACAGCGGCAAGGCCAAGGCGGCGGCGGGGGCCGACGAGTGCGCCATCTGCCTCGCCGAGTTCGAGGAGGGGCAGGCCATGCGCGTGCTGCCGCAGTGCGGCCACGCGTTCCACGCCGCCTGCGTCGACACGTGGCTG…
>Zm00001d051596
ATGGCGGCGAGCTCCACCAGCGCGCCCACGATGCCGGCGATGGTCACGCCTCTGCCGGGCTACGGCTACCAGGGCTCTGCCGCGGGCGCGGGCGCGGGCGGCGAGCCTCTGTACAGCTCCTCGGGGTCGTCGTCCATGGGCACCTTCTTCGGGGTGCTCGTCGCGGTCGTGGTGCTCACCCTGCTGTCCTGCGTCTTCGGCCGGGTGTGCGCGGGCCACGCCGAGGGGCCCGACGAGCGCTACGACTGCACGAGGCTGGCCCCGCGGTGGTGGTGCGGCTGGCGGCGGGCGCCTCGCCGGACCGCTGTGAAGCGCGAGGCGAAGGCGCCGCCCGTGTTGGAATTGGAAGCGCCTGCCGCATCGCCGCCGCCCGGGGAGCCGTAA
>Zm00001d051608
GCCCCTCGAACCAAAAGCGCCGGCATCTCAAACCCGACGGCGCTCTCTTCTCTATCCTCTGTCCCCTCCACCAAAACCGACGGCGACGTCGCTCTCCTCCACCGGTGCTTGGAGCTCTCCCTCCACCAGCGGCGGTCCACGGACGCTCGGCGAGCTCCACCGGCGGGCGCTGGTCAGATCCGCTTGGCAGTCATCCACCTGGCACATCGGCCGAAGCTCCCAGCGTCCTCCTGCAGGCCGAGCTGAAGGTTCAGCGCGCCGGTGGAGTTCGACGACGAAACTCCGTCACGTCATACCTCTCCGCCTCCCGTCTTCCAGACGTCTCCAATCGGGGCTCCCAGCGTCTCGGAGAAGAGGAGCAGCACGGCACGGCGGCTGTGGCGAGGAAGGCTCCTGTCC…
>Zm00001d051609
GAGACGGAGCGACGGACGACGACGACGCGACCTTATCTGGTGTCGGTCGACCAGCAGCCGTCCGCGGCTCCGCCCGACGCGATGTCCCCAACCGGCAGCCGAGCGCGGATTGCCGAAGCACCACACTCTCCTCGCTGATTCGTGCGGCCGCCCTCCGAAGCTCCGCCCGACGCGACGCCACCACTGCTTCACGACGGCAGGTGGCGGAGCTCGTTGCGCGCCGCGCGCGTGCAGACGTCGGCGAACGGGGCTCCCGGGACGTCCGCGCTGGCCAGTCGTGTCTGGTCTATGGAAGAAATAGCCGAGCGACCAGATATTAGATATCCATCTATTTTCCTCTAGTCCCCTATTGACCATGATATTCTTATGTCTCGTTTTTTTGAAAAGAGATGGTGCAAT…
>Zm00001d051617
TCCTTCTTATCCGTGTATGCAAGACAGAGGCTTCTAGTTTCTTCACCCGTGCTCTCTCCCTCATCCCCTGCGCATAGGAAGCCAGCTCCTTCACGTCGCCTCCTCCCTAGGCGGCGATCCTACAGAGCCTCGCCGGTCATCCCTGCTCCCTCGGCGTCTCTCCCATGGCGCCCTCCCTGCTCCTTCACATGGTGTGGACGCCAGCCCCCTCTCTTGTTGCCATGGATAGCCCCTCTCCCATCTCCTTCCCCAAGCACAAGTCCCATGGTCGCCCAACCCCAGCTCGCCCTGCCCCAGCCATGGACGCTGTCGAGCCGCCCGTTTCCTATCTCCCCTCGCCTTCATCCTCTGGCTGCCGCCCCTCCCTGGATTTCGCCCTCTCTACTCGTCGATCTTCTC…
>Zm00001d051634
ATCCCCACTTTGTTCGCCTCGCCGCATCTTCGCATCGACGGGCCGCCTTGTCTCAATAGCGCGCCGCTGGGGACTGGGGTAGTGGGGTGGGGTATAGGGTTTAGGCTAACCACACTCATACTACTCTAAATTTGTACTCTAAAAAAAATATTCTGTCCTGGTCAGCAAAATTCTTTACTCTATACCACAATCCTCCGCACTCATGTTTACTCTATATCCCAACCCTATACCAACTATCATATATTATATTATTTTTTAACTCTATATCCCTAGCTGGCGTCGGCGAGGCATATTGAAGTGTACCAGTAGCAGCAGTAGCTAGCTAGCTTTTCACCCACACGCATGCGCCTGCAGTCCGATCGAGTGGAGAGAGGGACTCTAGAAATAGCGTTTTACAAG…
>Zm00001d051653
ATGGCGTCCCGCGCCGCAGCGCTGCTCGTGGCCGTGGCCGTGGCGGCAGTGCTGTTCGCCGCGGCGTCGGCGCAGGAGACGGACCTGGGAGTGCCGCCCGCGCCGGCGCCCGTCACGGGCGCGGCAGCGGGGGCCGCGGCGTCGGCCCTGGATGTGGCTTGCTCTGTCGTCTTATCCGTCCTCGTCGCCGGTGGCCTCATGCAGTAG
>Zm00001d051659
AACCGGCAATCCCCTCACCATGAGGGTAATGTAATAATGTTTATCCAAAGCACACATATACGTGATGGTTAAATCGAATTGTTGAACTGGTCCAGACAAATGGCAAGCAATGGTACAGGTGTCGATCCCTCACTCGAGGGAAAGAACAAATAACAGGGCACCAAATTAAACTGGTGCATCAGCGATACCAATTCGTTAAATGAAAATCAAGTAGAAAGAGGAAGGAAAAAAAACAAACAAAAGGAAGACGAAGGTGTGCCACTGCCACCGCCGTGCCCAATCAGAGCACGCCCACGCATCGGGAATGCGCGGGAGCAGCAGAGCAGCGCAGCGCAGCCAAGTCTCTCCCCCCACCTTGGTCTCTTCCCTCCGGCTCCGGCTCCTCGTCCGGCGGCTCAG…
>Zm00001d051670
GAATTCGTTGCCTCCCTGTTGTTTGTGGTTGTGGCCAATCCTTCTCCTATCTCGTCCCGGAGTCCCGGGGGAAATTTTGCCCCAGAAACACTAGCGCGTCGGATCACAAGCAAGGGCGAAAATTTTCTGTGGCTCCAGCGGCTGAAGGACGCTGCGGCACCCATGTCGGCCATCGACCGATCAATAAATAAACATGGACAGAATCGAATTGGCAAGCAGGACGACACTGGTGGCCGCGCTCTACCCAAGTTCGGCGAGTGGGACGTGAACAACCCGGCGTCCGCGGACGGGTTCACGGTCATCTTCAGCAAGGCCAGGGACGAGAAGAAAGCTCCCCCGACCCAAGGCCACATCAGGAACAACAGGTCGGTGTCGGCTGACAGCAAGGACTCCAGGGCC…
>Zm00001d051681
ATGCCGCCACGCGCTGCGACCGCGAAGCCGTCGTGGCTCGGAGACGCGCTCCTCTTCGCCGCGGGTGCCGTGGTGGCCACCGTGGCGCTGCTCGCGTTCGCCAACCCGTTCGCTCAGCCGGAGGGCTACTACGGCGACGGAGCAGTCCCGTCCTCTGGCTCTGGCTCTGGCTCATCATCCGTGGGCGCCGCCGGCGGTGGTGGTGGTGCCGCCGCCCACACGTTCTACGACGACCCGGCGCTGGCGTACACCGTGGACCGGCCCATCACGGGGTGGGACGAGAAGCGCGCCGGGTGGCTGCGCGCGCACCCGGAGTTCGCCGGCGGTGGCGAGAAGGGGCGCGTCCTCATGGTGTCCGGCTCGCAGCCGACGCCGTGCCGGTCCCCGGGCGGAGACCAC…
>Zm00001d051713
TTTCTGCAGTGGTGATGTTTTCCTTTGGTTCAATAGCTACAAATTTTAATACATAATCCTTGGGATGAGTTTCATTCAAGCTGAGCAGCGCGTAGCTGCTACCAAGGTTCCCCGTTCGACGCTTGCAGCCGCATCCCTCTGCCAGCCAGGCGGTGGTGGGGAGGGAGACTGGGATGGAGCATGTGCCGATGTGGCTGCGTGCGTTCCTGGATCTGCACACCTATGTCAGCATGTAGGTGTGGGTTGAGTCGTCGGTGAATAATGACATGATGGACAAGGTGGAGCAAGTGCGGCAATAGAGGAAGGCCGAGAAGTCCCTGCTCAGCTTGCAATGAAGGTTGGCTATGGCAAGCATGGAAGAATTAAAGAATAATGGTTGTCAGGAGACATATGAGAGCC…
>Zm00001d051733
GTCCAGAGTCCGTGTCCGAGCTCCTGTTCCACGCGGTGTCCGTGTTCGTGTTCGAGTCCGAGCTCCTGTTCCAAGCGGTTTTTGGCCGTTGAGCAGAGCACTCGCCGCTGGGCGGTCGCCATCCTCGTCATGCTGCGGCGGTCGCCAAACTCGTCGTGCCTGCAGTCGGATTTGGCTCCACGGGTACGACTACGTCTCGCCCCTCACCCATCTGCTCCCTGCGGCCATGTGGAATCCCCTCCTCTTCCCTCTCCAAAAAATCTGCGACCGGTCTTCTCACCGTTGAGCACTCGCACAGCGCCGTCGTCCTGCTGCTGCTGTTCCAGGTCATCGTGTAGGGCCTAGCTGCGAGGGCTCCTGTTCCCTCTGGAATCCATCGCCGAGCAACCTCTAGCCAAC…
>Zm00001d051779
ATGACGCCTCGTACATCATGCATCACGTTTTACTTGGGCAACCAGCGGCCCAAGGACAACATCTCCGCCGTCGTGGACACCGGCAGCAACATATTTTGGACGACCGAGAAGGAGTGTAGCCGGTCCAAGACAAGGTCCATGCTGCCTTGCTGCAGCCCCAAGTGCGAGCAGCGCGCCAGCTGCGGGTGCCGACGAAGCGAGCTCAAGGCCGAAGCCGAGAAGGAGACGAAGTGCACGTACGCTATCAAATACGGCGGCAACGCGAACGACAGTACTGCAGGCGTCCTGTACGAGGACAAGCTCACCATTGTCGCCGTGGCAAGCAAGGCGGTGCCTGGCTCCCAAAGCTTTGAGGAAGTCGCCATCGGCTGCTCCACCTCCGCCACGCTCAAGTTCAAA…
>Zm00001d051788
GCAAATTAAGGCTTCAGCTCGCGCGAGACCTCAGCTTTCACTCGAGTGAGTGCGAGTCCATCGCCGGAGAGAGAGAGCGAGAGAGCACGCAATCGAGTTAAACAAGCTCTGTCTCTTGGTTCTCTGTCCACGGCGGGAGAGTGTGAGAGATGGGCAGGCAGCCGTGCTGCGAGAAGATCGGTATCAAGAAGGGGCCGTGGACCGCGGAGGAGGACCAGAAGCTGGTCACCTTCCTCCTGTCTCACGGCCATTGCTGCTGGCGGCTCGTCCCCAAGCTCGCGGGGCTGCTGAGGTGCGGGAAGAGCTGCCGGCTGCGGTGGACCAACTACCTGAGGCCGGACCTCAAGCGCGGCCTCCTCTCGGAGGAGGAAGAGGCGCTGGTCATCGACCTCCACGCGC…
>Zm00001d051794
AACACCAACGATGACCCAAATAGCGCAGATTTGCCAGTTCATGGAGAGGAACCCGGATGTGAGGTTCCTGCATGCAGGTGAACTATGAGGAGCACAAGTCTATGCGCTACAACCTTAATGTCCATGTCATCCCTTTCTTCACGTTCTACAGGGGAGCTTAGGGTCGACTCTGCAACTTCAGTTGTATCAAGGCAACTGTGAGATCCTATGTTCTACTGTCAATAGTTCTGTGTCCCTATTCTAATTGTTGTTTAAGTAAGGTTGAGTACAATTATTTTGGAAGATGTTTCTGTGGCCAATGAGCAATTATATTAACTAATTCAGTGAAATGAAAAGTTTTGAGGGTCTTGTTATTATTTGCAAATGAAAAAATGGCATTAGTAGGTGGTCCCAAGTACG…
>Zm00001d051800
ACGGGCACCCGCACAAGCTGCGCTGCCAGTGCCAGCGCTCACTCGAACGCCGAGACCCGAGAGGAGCAAACAGCCAAAAAGAACGGAAAGGGGAGAGCAAACAGCCAAAAAAGGACGGACTTGCGCGACAGGGTCGAAGACTCAGAAGGGGAATCTCCGGAGGATGGAGGTGGGCAGGACTCCGCGGCGACGGGCGTCCCCAGCGGCAGCGGCGGCGGCGGCGGCGGCGGCTGTGCCTTCGCTGCTTCTGTTCGCCGTGCTATTCGTGGGCCGGGCGGCGGCAGCGTTGGGCGGCCCGGGGCCGGCGCTATACAAGCACGCGTCGTTCTTCGACCGCGACGGCGACGGCGTCGTCTCCTTCGCGGAGACGTACGGCGGTGAGATGCTCGTCCCCGCTCC…
>Zm00001d051850
AGTGGCTGATTCAACTTTAGCGCACAGAGACTACTGGAAATGGTTGTACTGTTCTATTCAACTAAGATTCAATAAATGTTTCTTATAGGTTGAGTACTACAGAACTCTAGTAAACTTGAAGAGCATTGCACAGATAAGCACTCCAGATGCAACTTCTCTTCTTAATCAACCATATGATAAGTCAAGCCACAGGGCTTTAAATGCACCGCCACTATATCACGACTCATACAAGATAGCAAATGGTGGTTTCTAGCTTGCACCAAATGCAAAAAGTCTTCACCTCAAACCTCCACTGGATACCGCTGTACATCATGTGGTTGTACAGACGTAAAGTTTAGGATTCTCCAGCAACATCATTTGCTAAACTATCCACTTCCGCTAGACAGGAAAACACGAATG…
>Zm00001d051851
CACACTCGCACGTTCTGTCGCGCCCGCGCCGCATCCACCCCGCGGCCGCACCCTGCCGGCAGCCCCACATCCCGCCTTGCTCCTTCCATCCTCACCCTCATCCCGCCGCCCTCCTTCCATTTTTAGCTTTGACGGGTGGATCCCCAACGCTCCCTTCCATCCTCGCGGATCTCCCACCCTCGAATCCCGCGCTCCCTCTGGGTCGGCAATGAGGTCCAGCAGGGGTCGCACAGCGCCGGTCTCCACAGGGCGCTGCAGGTCTCCTCGAGCGTCCGGCAAGCCGCCGCCAGCTCCTCGGCGCGCTCCGTCACGTCCCTCGCGCGCTCCTCGTCCACGATCCCCTGCCGCCGCCGCCCCTCGTCCTCCTCCTCCTCTTCCTCCTCGGCGATCTCCTCGAGC…
>Zm00001d051917
ACCGCCACTGACCCATTGCGCCCCGCCTCTCGCCTCCCTCCCCCGCCAGTCACCACCACACTTGGTCAAGTTGCCATTTGCCTTCCTCCTCCTCCTCCCCATCGGCCCACCCTCCCCACCACTCACGGTGTAGCTGCCATTGTCGCTGTCTCCCTCTGCGCACTACCACATCACAGTGCCACGATCTCGGTCTCGCCGGTGCCACCTCCGGCGCCCGGCGGCTCTCTCTCTCTCAGACGGTACGGACGTGGCCGGCCGACTGCACGCAGTCCGGCCGGCGCTGCCTCGCAGCAACAAGACGGACAGCTCGCCACCGGCAGGGGGACCTCTGCTCGCCCCCGTCCTCGCGGGGAGACACGGGTTAGGCGCTAGATCCACGCGTCCGGCCCCGCCTGCGGT…
>Zm00001d051928
CTATCTCCAGTAGAGAAGTCATTCGGACATGTGGGCCACATCTCCACCGCCGCTCCCACTCCAGCTCCGGCGACCGCCGCATCCTCGCTTCATCGCCCGCCGCCGTAACAAGCGGCTGGACCGCATCGCGGCCTCACAGGACCCGCTAACCGCGCTGACCCGGGTGCTGTGGGGAGGCGCGCTGCCGCCGGCGCAGCTCGTCGTCGCCGTGCGCCACGGCTGGACCACGGCGTGGCAGCTCCTGATGCGGCAGCTGGCGCCGTCCGACCCCGCGACGGGCGGCTTCGCCCGTGCCCCTGCCCGCTTCCCCGCCGTCGTGGGGAAGCCCAGCTCCCGGCTCCACCTCTACGTGGGCCTCCCCTGCCCCTGGGCGCACCGCGCCCTCGTCGTCCGCGCGCT…
>Zm00001d052034
ACATATTCGTTCCTTGCCGCATGCATGCAGATCGATGGACGGCCTTAGCTCCCACTATACTACTCCATATATAATGCCCTGCTCCTTCCTCACGAGCTAGCTCACCGGCCGCTCAGCATGGACAGCTACTATTTGTACTGGCAGGGGAAGTGGTATTGGTGGTCGGGGTACTGGAACGATCCTAACGATAGCAGACGTTACCCAGCAGTTAATATAGTTATATTAACTAATGCCTCCTTCAACTATGCGTTGGGCATGGGAGCATTAGCCGAACCACCTCAGGACAGCTCTGCCGACGGTGTGATCTTGATCAAGGATATGGCGGAGTGGCAAAAGCACTGGGACCAGACTGCTCCATACAACAAGCTGCTGGTGTATGAGTTCTACGAAAAGAATTCC…
>Zm00001d052136
CTCAATCTCCACACAAAGCTTGGCCTGCCTGTTAAGCAACCCGGCGAGCGAGGTGGTGAGAGAACGAGCGAGAGGGAGATGGCAGCCACGGTGTCCTTCCCGGTGGTGAACATGGAGAAGCTGGAGACCGAGGAGAGGGACACGGCCATGGCGGTCATCCGCGACGCCTGCGAGAACTGGGGCTTCTTCGAGCTGCTGAACCATGGCATCTCGCACGAGCTGATGGACGAGGTGGAGCGGCTGACCAAGGCGCACTACGCCACCTTCCGGGAGGCCAAGTTCCAGGAGTTCGCGGCGCGGACGCTGGCCGCGGCCGGCGACGAGGGCGCCGACGTCAGCGACGTGGACTGGGAGAGCACCTTCTTCGTCCGCCACCTCCCGGCCTCCAACCTCGCCGAC…
>Zm00001d052148
CCGGGCCGGCCGGAGTGTCGATCGTTGTTTCCGCCGGTTGCGAGATCGGAGCCAGCAAGGACAGGTCGTCGTGGGACTAGCCATGCTGCACGCCGAGGAGAAGAAGGGGAAGGTGAAGAGAGGGTGGCTGGCGGTGCGCGTCGGGGCGGCGGAGGGCGACGGCGGCTCCCAGCGGTTCGTCATCCCCATCGCGCACCTGTACCACCCGCTGTTCCGCCGCCTGCTGGAGGCCGCGCGCGACGCCTACGGCTACGACTACTCCGCGGGCCCGCTGCGCCTGCCCTGCTCCGCCGACGAGTTCCTCCGCCTGCGCGCGCTGGTCGAGCGGGAGACGCCGCCGCACGCGGCGCCAGCGCCCGCGTCCTCGCACCGCGTGCACGAAGGCGGACACTACTCTAC…
>Zm00001d052220
ATGTACTCCTTCGACTTGGAGCAAGACCACACGGCGGCGGCAGCGCGCACTACCGCCACGACGACCTACCAGCCCTGCGCCCGCGGTGCCCGCTCGCTCCAGCTCTCCGGCGCCCACCACTACCACCCCGGCGAACAAGCACTCCGGACCGCCGCCGCCGTGCGGCCACGGCGCGCCAAGAGTAGCAGCAGCAGGAAGCACGCGCCGTCGTCGTCGCGCCGCTCCTCGACCACCGTGGTGGCGACCGACGTGAGCAACTTCCGGGCCATGGTGCAGGAGCTCACCGGCTTCTTCCCGCCGCCTGCCGCGGTCTTCCGGCCGCTGCCGCGCAGGGTGCACGCGACCAGCCCCAGCGTCGCCGTCGCCGTCGCCGCGGGGCAAGGGTGTGGCTGGGAACGC…
>Zm00001d052221
GGCACTGCCCATCATCCCCTGCCTTCCCCACGCGCACGACTCACGACGCACGGCGAAGCGCTCCGCGGGGCCGCGCGGCCGCGAACGTCGCCACGGTCATGGTCGCCATGACGGAGCCGCGTGACCCGCCGACCGGCTGCGCCATGTTCGGCATCTACAGCGGACTGTTCCGCCGTCGCCGCTCCGCATCCATGACCTCCCTCCACCGGATCGACGAGGCCCCGGCCGTGGCGCCGTTGGCGAACCCGGCGCATCATCAGAAGCCCGCCGTGCACCACGACGCATCCTCCCTCGCGCGCCGCCCCAACGCCGTGCCCGTGCCGGCGGCGCAGAACGGCGCCGTCGCCCGCGCCGCGCCACCGGCGGCGAACGGCAGGGGCAGGACAGTCACCAAGGCGG…
>Zm00001d052245
CTATTGCCACTTCCATCATCTATATACCCCCTTCATGTGTGTTGGCTGGATGATGAGTTATTTCTGCATATGCTTGAAAACCGACAGGTGGAGCAGGCCCATGCTGGCATCAATGCTCTAGCATTATCTCAGATAACAATAAACAAACTACGTGAGAACTTCATTGATATAGACAAGTTGTGTCAGGAGTGTCAAACTTTAATTGAGAACCATGACAAGATCAAGCTTCTTAGCAATACAAGAAACAATTTGAACACAACTCTAAAGGATGTGGGAGGTATGATGTCCATTTCTGTTGAGGCTGCTGCTGCACATGACTCATTAAGCAATGACCAGGAGTTAATTCACACTTACGAGACTAATAGCTCTTGATGGTAAGAGGCGTTTTGCTCTAGCTGC…
>Zm00001d052261
ACCTCGAAGAGCAAGCAAGAGAGGCAGACACAGATAGCTGCCAGTAGAGCTTCTTCTTCTTCTTCTTCTTCCGCTTCCTCTTGCCGAGCGCAGTGCTACGTAGGAAGGAGTTCACGCCCTCGCGCACGCGTCGTAGCTCGTCGGTCGATCGCCGGAAATGTCGACCAACTCGAGGGCCAACTCCAGGGCCAACTTCAACAACGAGATCCACGACATCGGCACGGCGGTGCACAACTCCAGCAGCCTGCCCCCCGCGTACTACGACCGGTCGCTAGCGGACATGTTCCCTCCCCACCTCCTCAAGAAGGTGGTCTCGGAGGTGGTGTCCACGTTCCTGCTGGTGTTCGTGACGTGCGGGGCGGCGGGGATCTACGGCAGCGACAAGGACCGCATCTCGCA…
>Zm00001d052371
ATGGCCAAGGTCCACCCCAACGCCGCGGAGTCCGTCCAGGCAGAGGCCGAGGGAGAGCTGCCCACGGTGCTGACGGTGTGGCGCAAGTCGCTGCTCTTCAACTGCGACGGCTTCACCGTCTACGACGCCCGCGGCGACCTGGCCTTCCGCGTGGACTGCTACGCCGGCTCGTTCCGCCGCCGGCGCCGCGCCGACGTCGTGCTCATGGACGCCACGGGGAAGCCGCTGCTCACCGTGCGCCGCAAGACGCGGTTCGGCTTAGCGGAGCGCTGGGTCATCTACGACGGCGACGCCGACGACGGCACGACGGCCGGGGCCACGCCGCTGCTGTCCGTCCGCCGCCGCCGCATAGGCGCGTGCTGCAAGACGCTGGCGCTCGCCCGCCCCCGCCCCCGCTCC…
>Zm00001d052410
CCCCAAACCCCAGCAGGCATCCTCTCTTCCTCTCCTCTCCAATCTCCATTGCAGCAGCACTGCAGCGGCGGGTGCGGGTGGCATGGCTATGGCGTCCGCGCTGCCGCTCCTCCTCGCGCCGCGCGCCGTCTTTGCGTCCGCGGGGCCGTCTTCGCCTCATCTCCGCTCCCGCCGCCTCGCGCTGCGTCTTCCTCCCCCTCCCCGACCCGCCGCCCTCTCCGCGCCACCAGCCGCCGTGCAGCCGCGCGAGGCCCGGCGCGTCCAGCCGCCCCGCGCCGCCTCCTGCTGCCAAGATCCCGCTCCGGCCGCGGGAGGAGGCGCCAGGGACTGGCGGATGTTCTTAGCATGGTACCTGATGGCTCTGGACAAGAACCCGATTGTGACTAAGGCGGTCACTTC…
>Zm00001d052564
ATGATGGAAAGCAGTGGTGGTAGTGGCAGCAGTGATCCGTTGCTGCTGGCGCCGGGATTCAGGTTCTACCCGACGGAGGAGGAGCTGCTGACCTTCTACCTCCGGCACCGCCTCGCCGGCACCAAGCCCGTCGTCGAGCACCTGATCCCCGTCATGGACATCTACGGCTACCACCCCTCCGAGCTCCAGGCGATGGCCGGCGCGGCGAACGTGTGCGACACGGAGCAGTGGTTCTTCTTCTGCCCCCGCGCGGAGCGGGAGCTGCACGGTGGGCGGCCCGCGCGCACCACGCCGTCGGGCTACTGGAAGGCCACTGGGTCGCCGTCCTACGTCTACTCCTCCTCGCCCAACAACCGGGTCATCGGGGAGAAGCGCACCATGGTCTTCTACCAGGGCCGC…
>Zm00001d052640
ATGGCCGTACAAGCGCAATTCGGCGGCCTCCTGCTCCCACCCTACGCGGTCGAGGACCAGATGCGGGCGCTCAAGGACTACGGCGTGCTCCTGTCCGCCGCGCAGAGCGAGCTGACGCGCAACGTCGTCGTCGGCGGCGGCGGGGCGGCCGCCATGCCCCTGCCGTCGCGCAAGCGCCACCGCAGGGAGGACGAGCACCGGCACTACAACGTGGACGTGCCTCTCCCGGGGATGGGGTCGCTGGCCGCAGACCCGACGGCGGCGGCGTCGACGAGCGGCCGGGCGCCCGCCGACGCCGAGGTGGACGCGCTGGTGCGGGCCGAGTGCGAGCAGCTGCGCGCGGGGCTGGAGGCGGCGCGGGCGCGGCAGCGCCGGGCGCTGCTGGCGCGCGCGGCCGCG…
>Zm00001d052661
ATGAGGCAGTGGAAGTCCCTAGTCCCGGCGCTGCACCTGCACGGCCCCGCCGCGTCCTGCTTCCCGCACCCGCCGTCGCCGTCGCCGCCCAGGGGGGACGACGAGGAGGAGACGGACCTGCTGCCGGCGGCACCGCCGCAGCTGGCCGGCGCGGCTCTGGCGGTGCGGCTGGTGGGGTGCGACGGGCGCGTGCGCGCGTACGCCCCGCCCGTGACGGCGCGGGAGTTGATGCAGGAGCACCCGCGGCACCTGGTGTGCCGCGCCGACGCGCTGCTCATCGGGGAGAGGATCCCGGCCGTGGCGCCGGCCGAGGAGCTGCAGCCCGGAGAGGCCTACTTCCTGCTGCCCGCGCACCTGTTCCGCTCCGTCCTCTCCTTCGTCTCCCTCGCGTCCTCGCTG…
>Zm00001d052769
GAGAGATGCTTGGTCGTTGTAGCCAAGTTCGAATTGGCACTCGTAGCATCTATTCTTTCCGGTCCGGCGGATGATCGATGTTGATATGTGCGGTCGTCGGCATAATATATAATACTCGACATCAAACAGCTAGCACTAGTAGGGCTGCATATGTCCCGTGGGCTCATTGCGTGCCTCCTGCCGTGTTCGATCGATCGGATCCCCATACGATCTACTAGCTAGCTAAGCTACACGACTCGACCGAGGAGGAGGAGCGCGCTCAGGCCGTATAGAAACTTGGAGCATGTCGTTAACCACCCAAGTGTTTGGGCCTCCCGGCTACAGGCGGTGGTGGATCTATTACATCGTCAACGATACTGATCAATTGAGTAAAGCTCTGAACCGACATGATCACCTGGT…
>Zm00001d052809
AATCACAGACTCACAGTGACTCAGTGACAGTAGTGTTCGGGCCCGATCGACTGCTCCTAGAAGCTTCGGCCGCGCCTCTATCTCATCTCCTTCCTCCTGTTGAGCCCGCCGGCCTCCCACAGCTTACTACGAAAACCCTAACCCCTTCCCTTATCCTCTGCTCCCTCTCCACGTTTCCACGAACGTTGGCGCGCAAGCTCGTGGTGTGAGCGGTCACTGTCTCCCATCCCATGGCTCCGGCGCTGAGCGGGACTCTGGGCGCGTCGTCGGTGGCGGCGCTGCGGCCCTGCGCGGGGAGGAGGGCGCCGTCCGCCGCGAGCTCGGTTGCGCCGCGCGGGAGCGGGGTGGTGAGGTGCTCCAGAGGGCTCAGGTGGGACGCCCACAGAAGCAGGGGGAGGT…
>Zm00001d052813
ATGGCCACGCACACGCCGCAACCGCAGGACCTCGCGAGCAATGGCGGCGACCCGCACGTGCTTCTTGTGCCGTACCCGGCGCAGGGACACATGCTCCCGCTCCTCGACCTGGCCACGCTGCTCGCCGAGCGAGGCCTCGCGGTCACCGTCGCCGTCACGTCCGGCAACGCCGCGCTGCTGGCGCCGCTGCTCCGCGCCTGCCCGTCCGCGGCCGTGCTCGCGCTGCCCTTCCCGCCGTCCTCGCCGCTGCTCCCGCCGGGGAGCGGCGAGAACACCAAGGACCTCCCGCGCCACCTCTTCCGCCCCTTCATGGCCTCGCTCGCGGCGCTCGGGCCGCCGCTGCTCGCCTGGTGCCACGCGCAGAGCCGGCACGGACGCCGCGTGACGGCCGTCGTCTCC…
>Zm00001d052864
ATGGAGTTCAAAGCCGGCGTTTTCACCGTGGCAATGCTAGCCATCGTCGTGCTCTCCACACCAGCAGCCCCGCAGAAGCCCAAGAGCCCTCCCGCTCCGCGATCCCCAGTCGTCCTGGCGCCGGCGCCAGCGCCCGCACCGGCGGCGCCGCACCACGTGGACCTCGCGGACCTCCTCAGCGTGGCCGGGCCGTTCCACACGTTCCTGGACTACCTGCAGAAGACCGGCGTCATCGAGACCTTCCAGAGCCAGGCGAACGACACGAAGCGGGGCGGCATCACCGTCTTCGTGCCCAAGGACTCGGCGTTCGCGGCGCTGAAGCAGACCACGTTCGCCAACCTCACCCAGGACCAGCTCAGGTCGCTGCTGCTGTGCCACGCGCTGCCCAAGTACTACTCG…
>Zm00001d052902
ATGAGAAAGGTGGAGAAGCTGATCGGGGAGGAACACAGCGGGCTCCGGTGGCTCGTCGGCGTCCATTATACGAAGGGGGACGGACGGCGGCAGGGCATGCTGCGTCGGGTCCGGGTACGGGAAGGTGTACAAGCATACCTTGATGGTCTTACATTTGTATTGTCGGCATTACCTTGCAGCACACCTATTCTTGCTACCCTTCTGGGATATGTTGCCACTTCAAGAGACCCAATTATTGGAGGAAGTTTATTGTTGACATACACAACGGGCTATGTTGCGCGTCTTCCTACTATAGCTTCTTTTGCTAGAGCACTGCAGATAGATTGTCTCGTGCTGATAGAGCGCCCGACAGGGCGCTTCGAGCATGCCAGGACCCTCGGCCCCAAGGGATCTGAATGC…
>Zm00001d052906
ATGGCGGTTGCTGCATGCGGCGGCGGCGGCGGACGTGGTCGCTCTCCTCTGTCAAGACTGTCACCTCAGCTGGGCTGCCTCCTCGTCGTCTCGCTGCTCTGCCTCCGCGCCGCCGTCGTCTGCCGCGCGCAGGTCCAGGAGCAGGGGCAGCTGCAGCCGCTGCCGGCGCTGGAGATCGAGACCTACAACTACACGTCGTTTGACGAGGGCAACTCGCGGGAGCAGCGGGAGCTGGCGTTCAGCAGGGATGCCCGCATCTACCAGGGCGCCATCCAGGTCTCCCCGGACACCGGCAACGTCGGCAGCTACCAGGACATCATGGTCAACAAGTCCGGCAACGTCCTCCTCCAGCGCCGCTTCACCATGTGGCGCCGCCTCGACAGCGGCAATGGCAATGGA…
>Zm00001d052952
AAAACCCCGCGCCCGCCATGCTAAAACCCTAATAAACCCTGCACCTCCATCGCACCCTCTCCGCCGCCAAGACCATCCTCGCATCCGGGTTGCCAGCTCTCCTTGAGCCCAGAAGCACACCGCGCGCCATGCGACCACCGAGAGGGCGAGGCGGTGGTGGCCGGTTCGGCGGAGGAGGAGGCCGGGGCCGCGGCGGGGGCCGATTCAGCGGTGGTGGCCGAGGTGGCGGCGGGGGCCGCTTCGGCGGCGGGTTCCGCGACGAGGGCCCGCCCGCGGAGGTCGTCGAGGTTTCGACGTTCCTGCACGCGTGCGAGGGGGAGGCGGTGACGAAGCTCACCAACGAGAAGGTGCCCTACTTCAACGCGCCCATCTATCTGCAGAACAAGACCCAGATCGGCA…
>Zm00001d053446
CGCCCACAGCCTTGGATGCCTGTCACCTGCAGCATATATAGATCCAGCCTCCAGCCCTCCACGCCATCTGCATGCAGAGTTGAGAGGCAAAGAAAGAAAAAGAAAACAAACATGACTCAAGCTCATTCAAAGTCATGCTTCCAACAATTTTGGGATGGAGTTCAAGTTAAGAGGAACAGTGGCAGCTTCACCATCGAGCTCCTGCCATCTCTTGGCGCAACAATAAACCAATCTAACAAGCTGCGGAAGTTCATCATATCTCCCTACGATCCCTGCTACAGATACTGGGAGCTGTTCCTCATAGTCCTGGTCATTTACTCCGCCTGGATCTGCCCGTTTGAACTAGCGTTTTTGCGGGACTTGCCCTCTAAGCTTCTGCTAGCTGAGAACATCGTCAAT…
>Zm00001d053514
ATGGAGAAGCTTCCGTCACAGCAGCAGGTTGTGCTGTTGGCGAGTCCTGGCGCGGGCCACCTCATCCCGATGGTGGAGCTCGCGCAGCGGCTCGCCGCTGACCACGGCTTCGCGGTCACGTTGGTCACCATCCCCGGCATGTCCAACCCGGCAACGGAGGCCGTCGTGCTGTCCTCGCTGCCGTCCTACGTCCTGACCGCGGTGCTTCCTGCTGTTCCTCTTGACGACCTCCCGTCGGACATCGGCTTCGGTGCCCTCGTGTTCGAGTTCGTCCGCCGATCGCTCCCAAACCTCCGCGCGCTCATGGAGGACGCCAGCCGCGGCTCGGTGACCGCGCTCGTATGTGACTTCTTCGGAACCTCGGCGCTGCCGCTCGCCGCGGAGCTCGGCGTTCAGGGG…
>Zm00001d053563
GGGGGGAGAAAGGGGCGCACGAGGCAATTTATAGGGAGGAAGAGGAGGGGCCGGGCCTGAGCAGAGCAGGCCGGACCAGCCATCTCTCCTCTGAGGCGTCGAGGGGAGGCGGCGCCCGAGATGGGGGACTCCGGCGGCTCCGTCGTGTCGGTCGACGTCGAGCGCATCTCCTTTGGCGGCAAGGAACACCATATACAAACGAATCATGGACCTGTATCTGTTGCAGTGTACGGTGACCATGACAAGCCTGCCCTTGTTACTTATCCCGATATTGCTTTAAACTGTAAGAACTACACTTGTTTCAAGTATACCGGTTCTCCCTTCGATTTTTTCCAGTAATTTATAAACACTCGTCTCCTTGTTATAACTTGTCAGATATGTCCTGCTTCCAAGGACTAT…
>Zm00001d053652
ATGCCGGCGTCCATCGGACCCGAAGAAGAAGATCCGGCCGGCGCACCGCAGCAGGGCTCCGTATCTGAAGGCGACCTGCGCACTCTCCAGGCGGAGGGCAGTCTCAGACCTGGCGCCCCACGCACAGGTTATGCAGTTCCTCAGAGGTTCCTGGAAGCTGCAACAATGGAGCTCAAGTCACTCGCCAATCCATTCCCATGCCGGCGTCCACCGGACCCGAAGAAGAAGATCCGGCCGGCGCGCCGCAGCAGGGCTCCGTATCTGAAGTCGACCTGCGCGCTCTCCAGGCGGAGGGCGGTCTCAGACATGGCGGTTGTCGGCGCAGTGGCCCTCTCCACGCCCACGCCGGCGCTAGCAGAGCAGCCTGACGTCACCAGGTACCGGAAGGTGGGGAGTGGA…
>Zm00001d053667
ACAACGGCGGGAAATTTTCCGCTCGCTCCCGCCGCCGCTCTCCCGTGTATATCCCAGTCGCCTGCGACCTCCGTTCCTCTTTCCCAGTCGCCCCCCAGTCCATCACCACTTCTCCATTCCTCTTTCCCAGTGCCCCCAGTCCATCACCACATCCGTTCAAATGGGCCGCAACCGCAAGGGCCGCAAGGCTAGGGTTTCGCACGACGCCGACGCCGACGCCGACGCCGATGGCAGCGAGGATGAGAGGGCCACCACTGCGGGCAGGAGCCTCTACGAGATTCTAGGAGTTGAGAAGACCGCTTCTCAACAAGAAATAAAGAAGGCGTATCACAAATTGGCTCTGCGCCTCCACCCAGATAAGAATCCTGGGGATGAGGAAGCCAAAGAGAAGTTTCAGCA…
>Zm00001d053761
CTCCGCCTCCCCCTTTTCTCCGCGGGGCTTTCCCCCTCACAAATCCCAACCCCCTTTTCCCTCCCTTTCTTCCCTCACCGCTGCTCACTCACCCCCACCAGTCAGCGATCTCACACAGTAACAACTCTCTCTCTCTCTCTCCACCTTTTTCACTCCCGTTGCTGGCTGCTTTGCTCCTCTGCTCTCCCTCTCCTCTCTCTCCTCCGCTGCCTTTATCTCACTTCGCCGCCACTCCCAGTCCCAGTCGTCCCTCTCTATCTCCATCTCTCTATCTCTGCACTGCACTGCTCACAGTCACAGCTATAGATTCTAGAAGCCAACAAAAACAGACGGGAGCGGAGAATCGTGCTCCGGGAAAACAAGAGAATCCACCTCCTCTCCCCTCCCCTCCCCTTCACT…
>Zm00001d053839
GACCTGTGTACACTCGTACTCGTCTCTTCTTCGCCACACACACACACGGCTGCTAGTGTACACAGAGGCACAGCAGCAGGAGGATGGCCGTAGTGCCGGCGGCGCCGGTGGTTCTTGGAGTGGCCATGGTGCTCGTCGTCCTGGCCGCCAGCGCCGGCGCGGCCGGGCAGCTCAGGATGGGGTTCTACGCCGAGAGCTGCCCGGGCGTGGAGCGCGTGGTGGGCGACTTCGTCCGGCAGCACGTCCGCCGCGTGCCCACCGTCGCCGCCGCGTTGCTCCGGCTGCACTTCCACGACTGCTTCGTCAGGGGCTGCGACGCCTCCGTCCTGCTCAACTCCACCGCCGGCAGCGTGGCCGAGAAGGACGCGCCGCCGAACCTGACGCTGCGCGGCTTCGACC…
>Zm00001d053876
ATGGTTGACGCCATCGACGCCATGCCCTCGCGCTCCACCTCCGCCCCGAGAGCAGCGCGCACCGCCCGGAGATGTCGTACACGTTCCCCACGCAGCCCATCGTGGCGCCGGCGAAGAAGAAGGACGCCCGCAAGGACGCCGCCGACGCCGCAGAGAGGCACTGCAGCCCTCTGCCGTCGAGGGAGCACGGGAGGGCGGCCGTCGCCGTCGACGGCGACAGGGGCAGCCAGTACGCGCTCAAGTGGGCCGCCGACAACATCCTCTCCCGCGCCCGCCCCTTCTTCCTCGTCCACGTCCGCCGCAAGCCCACCTTCCTCCAGGGCCCCGGCGGTAAGCAGTTCGCCATATCACACGTGCAGGACGACATCCCGGCCGATCTTCACGCCCAGATGGACCTTC…
>Zm00001d053888
GGAATCCAGGTGCAAATCCCTCCCTCCCTCCCAGTCCCCCTCCCCACCTCCCTCTCCGCGCGGCGGCTGCCGTCGAAGCCGCCGAGGCTGTCCCTCCCTCCCTCCCAGCCCCCCTCCCCACCTCCCTCTCCGCGCGGCGGCTGCCGTCGAAGCCGCCGGGGCCGTCCACCACCAACCCCTACCCGCTCTTCGCCAACCCTCGCCTCCTGCGCCGCCGCCTGGCGCTCTCCGGCGCTGGCGCCGACCAAGCCCCGCGCCGCGCCGCGCCGACCCCAGCCGCCGCGGGTGAGGGCCCCTCCGCCCTCCTCCACCGAGGACCCGGTCCTTGTCCGCGTCGCGGACGAAGGCGTGCCGCTCGAGGGCGTCATCCAGATTGAGAAGCTCGGGGATGCGGCCGCC…
>Zm00001d053895
GCAACGGTCCCGGACTGGTCCTGCAATACAAAAGGATTCTTCAGTTAGCAGTAGCTTTCAGCTGATCGATTCACTTCTCCTCCCCGTCTGTTGAGTCATTACCCGCAGGCGTTTCGTCACCGCTTTCAGAATTCAGACAGAGGTCGGTCGCCAGGAACCCATAAAAAAAGTTTCCAAGCATGCATGGTTTTGTTGCCTGTGAGTAGATGATGTTGGAGTACGTAACGTAGTAACAATGAGCAGTGATGTGAATTGCGATGATATACGTGACGCCGAGAGAGCACATGAACAGGCGGCAGCGGGCACAGTCCTCCAGTCCTCGGGTGAGGCGATCGTCGCCGGCGCCATGGGAGGGGGAGTCCACCACCACCACCCGTGCGTGGCTGCTGATGGAGATGG…
>Zm00001d053897
GAGAGAGAGGCCCTGCGCTGCAAATCCTCGGTGGTTTTGCAGCTTCCAGAGCTTGAGATTGAGACCAGCGCGGCAGTTCTTTCTTGGTCGTCGATGGCGCTGAGGAGGATCATCAAGGAGCTCAAGGACCTGCAGAGGGATCCACCCACGTCCTGCAGCGCAGGGCCTGTGTCCGACGACATGTTCCACTGGCAAGCGACGATCATGGGGCCCAGCGACAGCCCCTACTCGGGGGGCGTGTTCCTGGTCGCCATCCACTTCCCTCCGGACTACCCGTTCAAGCCTCCCAAGGTGGCGTTCAAGACGAAGGTGTTCCACCCCAACATCAACAGCAACGGCAGCATCTGCCTGGACATCCTCAAGGAGCAGTGGAGCCCCGCGCTGACGGTCTCCAAGGTG…
>Zm00001d053926
ATGGCGGCGTCCGCGAGCCGGGCCCGCGCCGGCGCCGGCGGCGCTGGCGAGGAGTACGAGGACCTGCTGCCGGTGATGGGCGAGCGGCTGGGCGTGGCGGGGCTGCTGGCGGAGCTGCGCGCGGGGTTCAGGCTGCTGGCGGACCGGGAGCGGGGCGCCATCACGCCCGACAGCCTGCGGCGCGGCGCGGCGGCGGCGCTGGGCGTGGCCGGGATGGCGCACGCCGACGCGGCCGCCATGGTGCGCGAGGGCGACGCCGACGGCGACGGCGCGCTCAGCGAGGCCGAGTTCTGCGTCCTCATGGTGCGCCTCAGCCCCGGCATCATGGCCCACGCCGAGGCCTGGCTCGCCGACGCCATCGCCGCCGACGAGATGCAGCTGGTTGATGATGCCATGCCC…
>Zm00001d053965
ATGTCGATGCTCACCAGCATACTGGGCCGCAAGCATCAGCCGCCGCCGCAGCAGCAGCAGCAGCAGAAGGGCGGCGGCGCGCGCACTGGCACCGGCGCCGGCGCCGGCACGGAGGCGGCGGCAGTGGAGCCGGTGAGCATCGACATCGCGGAGCAGGGGCCGCTAGTGGACGCCATCACGCTGGCGGCGTTCGCGGCGCCGGCGCTAGGCCTGCCGCCGTTCGCGACGGCCAGCATGGACTGGAAGGAGACGCCGACGGCGCACGTGTTCATGGCGGACCTCCCCGGGCTGCGCCGCGACGAGGTGAAGGTGGAGGTGGAGGAGGAGAGGCTGCTCCGGATCAGCGGGCAGCGGCAGCGCGCCGCCGAGGAGAAGGGCGACCGCTGGCACCGCGTCGAG…
>Zm00001d054015
CTTTATGGATAACGATGATGATGACTATGAGGCGGCCGTTGTGGGCGCGCCATTCCGGACCCTACACTCCAGCTCCACTCTCCCATGGCTTCCTCCGCCCTGCCTTCCAGAACCTTGCACCGCCGCGCGCTCCCCTCGTCTACGCCGTGCCACCCTGCGACGGAGACCTTCGCCCCCGGCGCCGTCTCCCGGCGGCGAGCAGCCGTGCGGCTCCTCTCCGCCGGGTTCCTGACCGCCGTCGCGCCGCCGCCGTCGCTCGCCGCGAGGAGGGGACGCGTTGTCGTGCCACCGGAGGACTACGCCACTGCACCCGATGGTCTCAAGTACTACGATCTTGTCGAAGGGAAGGGACCAACTGCTGAGAAGGGCTCAACCGTGCTGGTCCACTTCGACTGCATT…
>Zm00001d054044
ATGTAAACCACACTCCACTCCAGCACTGAACACTTGATTGATTCAGTGGGTAGCTAGCTAGCTGAATCACAATGGATCCTACCAAGTTCCGTCCGTCCAGCAGCCACGACACGACGGTGACGACGACGAACGCGGGCGCTCCTGTGTGGAACGACAACGAGGCGCTGACTGTGGGGCCTCGCGGTCCCATCCTGCTGGAGGACTACCACCTGATCGAGAAGGTGGCGCACTTCGCGCGCGAGCGCATCCCGGAGCGCGTGGTGCACGCGCGCGGGGCCTCCGCCAAGGGCTTCTTCGAGTGCACCCACGACGTGACGTCGCTGACGTGCGCCGACTTCCTGCGCGCGCCCGGCGTGCGGACGCCCGTGATCGTGCGCTTCTCGACGGTGATCCACGAGC…
>Novel01001
ATAATAGTGACTTTATCAGTAGTCAGGTCTGTTCGCATTGTTTCAACAGCTAATAGTTCCACAAATGATTTGGTAGGAACAAAGTGTGTATTAACATCCTATGGTCCTTTCAAGTTTCAGTTATTGATCTTTTTGTGTTAGGTACCTTAGTTCAGACCTCAGCATGATCCACCCCTCCCGACGGGATAGAATTGGTGGGACAAGAGGTCCAAATTTCCCTTTCCCCCTCCTTCCCTATGAACCAAGCAACGGGTGAGCTTTCCATCCCTCTGTCTAGCCCCTCATATCCCATTATACAAACATCACCTAATTTTGGTTGCAAATCCTTTCTGTTGCTGCTTCTGATTTATTTTATTTGATCAACAGTAAGCACAATATCCTTTGTTTGTCTGTAGTATT…
>Novel01018
GGAAGTTAGCTTTCAGTTGCTGATCCACAGGTGCGGTCAAACGAGCCGCTAACTTCCTATGTTCACCTCTAGGAAGTTAGCTGACCATACTAACTTCCTATGGTCTACTCTAGGAAGTTAGCTTTCAGCTTTTGACCAGTCAAATGAAAAGTTAACTTTCTAGAGTACATGTACAACCTCTAGGATGTTAAGTAATTTCCTATGGCTTTACTCTAGGAAGTTATATTTTTTATCTTAAACCCTGAATCAATCTTATCCTCTTCACACTTTCCTTTCTCCCTCCTGTGACTCAGTCGGTCATGGCGGCTCAGATCCAGACTCCTCCGGCGTGGGCGGGCGTGAGATCCCCGACAGCACGGCCCTAGCAGCGGCCACCCCCGGTGGGCACGGCTTGTGCGC…
>Novel01020
CCCATATCCAAATCGTGCAGAGCAGTCATCCCATCTAGGCGATTATCGGTCTTCTCGTGTGCGCAGATTGTGATATGTTCCTGAGCTTCGAGGAATCGAAGATCAAGCGTTGGCGACCAAGTGATCTGGCTCTTCGAGTTCTACAAAGTTGAATACCCTGAGCATCTGTTTGGTGAAGGTTGCCTTTGGTGCAATCTATGCTTAGGTAAAGAAGAAGGTGTCGAGGCGGATCTCCAGGAGTTCCAGGACTTCGACGAGTTCTAGGATTAGGCTAGCAACCTCCCCCAGTCAGCTGCCTGTGGTGGGTTTATTTACGTTGGCTACGTTTCTATTCTGTGTACTTTGATTATATTATGTAAATGACTCTAGTCTTTCATATTATTACTTATCTTTATTGTT…
>Novel01021
GCAACCTCATTGCCTTATGTCGATTGCTGGTGAAATGGAAAAGAGTAGAATATAATTTTACCATATGTTATTTTTAGCTTAAAGAGCTAGAGAAAATGGGTCCTAAAAAGGGAGTGATTAGTCAGTCTGTGAAAGATGTGGTACGAAGCCTGGTGGATGATGATCTTGCCTTGAAGGACAAAATATATTTTTGACATTGTGTTAATTTATTAGTGATTCAGAAATAATTTCCTGTATTATCCAACAACTTGCTCTTGCATATAACTGAACCTTTATATATATTGTCTGTGCTACAAACAAACATATTTTGTCCATAACCTTTTCCTCTCTAACTCCTAGCCTATAATAGTTTTCTTGCAGGTGTACTTTTGGAGTCTTCCAAGTTGTGCTGGGAACCAG…
>Novel01031
CACCTTGGAACTTTTCACCACTAGGCTAGCTGAACCTGAAGACGTCTGCCTTCCTGCCCTTTATTTAAGTGCTGGTTCGGTGAAGATTTCCCTCTGCCCTGGTGTTCTAGCCAAAGCTTGCAGTGGTGTGAGGGATTCATGTGTATTGCAAGCCAAAGCTCCTCTCCCACTGCCACCAAGTTGGCACTGTCCAGAGCTGTGTGCGCTGTCTTCCTGTGTTTGTGATGACCACAACCACCAAGTTCACCCCACCATAGCCAGAACATTCTAGGGAGTTGCTGGCCTATATGAAGCTTGTTCCGTAATCATCTCAGCTTTGGAGCTCTTTGCTGCTCTATCCATAGAGTTATAGCTTATGGCCACTATAACAAAGTTATAGATCTATTATAGGAGTACAAG…
>Novel01032
GTGTAATGCCATGTTGCCCCCGCATCATCATCTAAGATTTCGTTTGTCGTCCGCGCTGCAGTCTGCTTCCCGTTTCACTCTTATATTTTTTTGTTGGACGGAGTTGTTTTGCATCGTTTCGATCTGTACCGTACTGTTTCCCCTCTTGTTCATAACGGCGGCGACACAAATTCTTGCGTGCTGCGCCGCTCACGCAAGGAGGGATAAATCGACTCGTCAAGAAATCGTTTCAGTTGCCATGACTCCAGTAGGCAATATGATTGTTGCTTGACTACAGTTTTGTCTTCCACTACTTAGCTTATTTGTTTGTTTTATTCTTACCTCGCCCGTATTTTCTTTGTTTTATTCTTACCTCGCTCCCGATTTTAAGATCTAATTTGGTATCTGCACGGTGCTTAC…
>Novel01044
GTCATGTTTAATGCTGACGTTGCAAGGAACAACACTAAAGATCAATATCAAACATTGAAAGACCCAGTAAACAAGACATTGAAAGATACCAAGAATAGTGGGACATACTCTACTTGTCTTTAAGTAGGCGATACCGTAGCGGGCCCACTCGCCGATCAACCAGTAGGATGGCCACCGAGACGACGACCGCCCCGGCGCCACCGGACGACCCTCCTCATCCTCCTCTGGCGGAGGCAGGCGTCGCCACGCCAAGCCATTCGGTATGCACGGCCAACCGCCTCTCGGGTGATGTGATGGAATCCACAATTCTGAATTTCTGATCCTTCACTTGCAGAGACCGTCGGGGTTCAATCATAAATAATATAGCATACAGTGTACTTGCTATAAACTGCTTAGAAT…
>Novel01045
ATTTTATCTGAGCCAATTTCGTCATTAGAATATGTACATTGATGTGTCCGTTACAGTTTTTCTATCAAAGAATATTGTTATAGTAATTATTATTTCATCAAGCATAATATATCCTAGCAACGCACGGGCCATTAACTAGAGGAAATCCATTCGTGAGTTGGAAATATTATGGAGATTCAAGTCGACTGTGTGTTATGTCGGTTTTCAATATGTAGCTCTTGTATCCTGATTGATTCTGCCTGGAATCATAACCTTGTGTGTTGTTTCTATGGCTGCGAGTTTTTGTTCCTTCGGATACGACAATGCTCGCTTCTTTCAGGTTTTGAGTGATCCCTAGAATAGGGTGGCATATGATCAGTAGGGCAAGGAAGGGCTGAAGGCCTTTGCAGATATCCAGGA…
>Novel01046
CTACGCTCAACGGAAACCGAGATTTCCTGGCCGCCATTCTTGCGCCAGTCTTTGGGGAAGGCACGACCTCTACCACTTTTCCCCGACCTTCGGTGTATATAGGCGCCGTCAGCATGTTTGTATCGCCACGGCGCAGCTCGACGGGAGATAACCAACTGAGTGCCCCTCTTGCCGTCCCACCATTTTCGTGGCTCGCCGGTGTTCTAACCTTGAAGCTCGGCCGCCTGGAATCGACTTGGCGCGCGGAGTGTGGAGGCCCCGGTTGCGCGCGCCTAGGGAGCCTCAGCGGCGGCCAATTTCTCAATCCCCCGCTGGTGCCACCATCCCGCGCGAAGAACGACACCCACCCTGACACGAAGCCGAAGAGCCTGTGACTGAGGATCCTGGTGACCAACAGAT…
>Novel01047
TCTGGTACCTCTAACCCTCTCACTCTTCCCTCCCGCGTGTATTTCCGCTAACATACTCTACTCTGTAGCAGGCACCACCACCGCGCGCTCATGGACCCTGACCCACGACCGCCGGCAGCGGCAGCGGCAGCGCAGGTGCGGCTCCTCCTCATGGCCATCGCGGCCGTCGCCTGCATCAACGCCGCCGAGCCCCACCTCGCCTTGGCAGCCTTCGTCCTTTGGCTCGTCGCCATCTTTCCCCCGCTCCACCGCCACGACTGAGGCAGCCGCAGTTGGTCGTGCACAGCGTGAAGGAGGACCACACACAGGAGGTTGCGCGGCGGCGGCGGCGACGCTGCCCTGGCGGGGGTGGTGGTTTGGAGGCAGCAGGTGCCCGCGTGTAGGGAGGGGGGTGTTGCC…
>Novel01060
CTGGTGGCCCACGCACGCGCGTCAACTCCACGCCGACAAGCGAGACCGGCCTGTCTGCCTCATCACGCCCATGACAGACCATCATCGTGCCAGCCCTGTGGCCACCTCCGCGCCAGTAACTGATGGGCCCGCCTCGTCATCCGCGGTTCCCCATCCACGCGCTCCTACTATCACTGTCGTGTGGGTCATGTTTGTCAGTGTTCTCCTCAAGCTCAGGATGGTAACAAATCCCGCGCTGCTCGCCGATATGGGTGGGAGGCAGGTGCTGGGATCCCTCTGACCTCGGAATCGGGCTTCGCCCGATTATAAAACAATGCACTGCCTTCCCTTCTTGGCTACAACCGCGTGGATCGGGCAAAACTTTGTGCATCCTTGCTGTGGACAAGGATTGGGTGCCGC…
>Novel01064
CCTGGTCATCGCGTTTTTTCTTATAGATGCTCAGTCTTACCGCGCGTCCTCTTTCCTGTTCGCCAGCGCGCCCTCTCGGCTCGCTCGGCTTTAATTCCCAATCGTGTCGTCGATTCCACCGGTTAGCGTCATTCGTCGTCGCGTCGCGTGTGCAGCTCTATATACGTCACTCTCCTGTGTCGTCGTCGTTCCACGTGTCGTCAAGAAATTCCAAGAGTCGAGTGAAGATGGAGCCAGCAGCATGGTGTTCACCAAGTGCGCGACAAAAAGCTCGGACATCCTGCGCGACTCAAGTTCGATTCGTCAAAATTATTTAGTCGAGGAAAAGATCTTCAGCAAATGATTATCGAAGAAAAGAAGGCCCCTGGGTGACGTCAACCGGAACCTGTAGTCGTGCTT…
>Novel01071
AATAGATTGCAACCTCACTGACGGAGAGTACGTACTCATCCCCGAGCAAGGAGCTAACCAAGAGGAAGCTCCAGAGCTAACTGCAGAGGTTACTCCTGAGGATCCACCTGCTGTCCCAGCAACTGAAGGTACCCTTGGGGAGGATATGGTTTCTAGGTTAACTTGGTCGTCCACCTTGCCACCGGGTTGGACAGTCGAGTGGAACCCCGTCTCAGCAGGTGATGACCAGTAGGAGTGATGGACTAGGCTTCGCCTCACTTCTTATTTATCGTTTGTTAATTTCCGCTGTAACAAGAACAATGTTTACTATTTTCAAACTCCGATGATGTAATAACTCTAAGTACTCATTTAAATTTGTGGTATTTAGATTTATTGTATTTCTCTGTGTCTCACCTTCGT…
>Novel01074
TCCCTCTTGCCTTTATATTAACCCCCATGAACCTCCCCACGTCCATCCGAAGAACAAGACCGGCGGCAGCTGAGAACTTGGGGAGCCGCCACAGACTTTATCATGCCACAACCAAATTGGCGTTCGGGTTGCCATTTTGCGTGACCTCTGATGCACACCACTCATACCTGTGGCCTCGCTACGACGGGACGACAATCTGGGGCGGTGAATTTCCGGTCGGATCACGGGAAGTCGTCTGGAATCTCGCTCTACCACAGGCGTGCGGATATGCGCTCCAAATCTCGTGCGGTCACGAGGATCCGAAGAATCACCCTGGTAACTGGAATCTCAAGTGCGAGATGTTGAATGAGGAAGAAGTTGACGACCTCGCCGGTCTCGGAAGCTCGATGACCTGGATGG…
>Novel01075
GCCGATCCAATTCTATCCCGACGCGTAGGGTTTCCTGTGGCAGCGCTCCCGGCCACTAGAGGTCGGGCAACATTCCCCAGTTTGGAAGGACACGAGTGGATCCAATCGACTGCACTCCACCGCCACCATCTCCACCAGCATCGCCCACACCGCTGTCATCCGCTCCGTCGCTGTGCCATCGTCGTCCACTGTGCCGCCATCCGCTCCACCGTCGTGCCATCGTCGTCCACTGAGCCGCCATTGGAAGAGTGCTAAGTGGAAGCAACATATGAAGCTCACATGGAGAAGGAAAATGGAACGACAGTCCACATGAAGCTTGTAAAAAAGGAGTTAAACTCATAATACTTTCTAGTGTCAAAGTTCAACATGATACATGGTTGTGGGTTTTTATTTGTGCAT…
>Novel01076
ATCTGCTCGATCTCCCTCTTGTTTCTCTGTTGGCGCGCACCTAGATCTTCTTCCCCACGCGCGCAGCCATCCTCTGCTCGGTGCTTCCTCAGTCGCGCCCTGAGGTTCTTCCCGCCCAGCTCAGCCGCTCCCTCCTCTCCTTCCCTGCTCGCCCCCGCCTCCTTGGTTCTCCTCGCCGGCGCCCTGCCTTTTCCCAACCGCGCCGGTCGCTGCTTTCCCCGACCTCGCCGGCGCTCCTCCCTCTGCCCGTTGCCATGGCCGTCGTGAGCTCGCCCCCAACGTCGAGCTCGGCTTTGAGCTCCCTCCCTGCTCGGCTCTGCCCTCAACGCCGGCCATTTCCTGCTCCAACCGTCGCGCCCCAAGCTTCTCTAATCGAGCGTCGTGTGGTCGCCTGACCGC…
>Novel01079
GTTCACCTCGCGTACGCGACAACTAGGCTGACCGCCGCCGCCCTACGCTCAACTGCCCACCTGCCCTGGTCTTCGACTCTTCGTCGTGCGCTTTGCCGGCGGCGAGCACCCATCACACCAGGTATGTCCGCCAGTCAAACCAAAGGTGAACCAGGAAGCGGCTTTTTCGAAAAGCCGGCTTTCCCACATTGCAAAAATTAAAATCATCATTAGACAACTGCAGAAGCTCGTGGTAAACTACTGCGACTGGGGAGGGAGCAGCAGGGGCATCAGGTACGCTAATTATCGAGATGCGATGGCCAGGGTCTAGGTTGACCCCTAGTGGTGCAAAGGATGGCCTACTTCGAGAGGCGATGTCGGCGGACCAATCTAGAAGATTGATGATCTCTACATAAACAC…
>Novel01082
CCATGATCAAATATACTTGCAGTTATTAAGGTGAACACATAAAAAACTAAAATGGACACAGATCAGAAAACTGCATCGGTAACTTCATCAAACTTGAACTACACTATATCTGTCGACAGTAGCTTAAAGCTTAAATCGAAAAGGAATTGATTAAATTTCAAGAAAACACACTGGACAATAGGGCTTCAACAAAAGCAAAACAAATATAATTGCCACCTAACTTTTAGTAGTTTCAATTTACCATCGATTCCTTTAAGAAGCTGCTCTTCTGTTACATATAACATTTTTAGGGATTTTTTGAGTTTTATTTCCCACAGATCTGCCAATTCATTAATCGAGCACACATTTCCTGGAGGCCTCAGATACAACATCTTGTTCAATGTTCTGGGATCCTCTATA…
>Novel01087
CTGAGCCTGCCCTCCTATGGGCTCACCGACATGCTGTCTCGGCCTTCAGGAACCTCACGTTCCTGCAGATGCTGAACCTGAGCTATGATTGGTTCCGTGGGGAGGTCCTGGCGACCATCGGCCGCCTTGCGCATCTGCAAGTGCTAGACCTGAGCTACAACGCCTTCTCCGCAACCATATCCATGGCTAGACGCGGTGACCCCCACACCGAACACTTCCTCCTCCACGGTTGCCGCATTGTCCTTGGTGGCAACACAAGCTCTTGTACCTCCAGCCGAAGCAACAGGTGAGCTCATTGAGCCCTCAATGGTAGGTGGCTGGACCTGGTGGACCGAAGATCCTGAGCCATTCTGCATACCAGCACATGGATAAACAATGCTCCATAGATCATGAAGCAGA…
>Novel01089
ATATGCTGAGGCGATGTCTAGTCAGCACGGATCGAACTATGACTGGAGGACCGCACCTATTGATCCTCAGGCTGTGTATGCAACTAGTGGAAAACCCCATGGAAGGTACTCGATTTTCGATAATGTCATCGACTCGAGCCAGGTGACGGTTCAGAGGGGAGGTTTGTCGAGGTCTGCTGCTCGTAGCTCCCGTCACTCTACTCAGGATACTGCAGAAGTTGAGCAACTACGAGAAGAGCTTAGGCAACATCAGGAGCGGCAAAGGGTTCAAGAGGAATACTTGAGGCAACATGCTGCTCAACAAGAATACTATGCTACTCAGTTTCAACAACAACAAGCACTGATACAACAACTAGCACAAGCCCAAGGGATACAGTTTCTGATGGCCCCCCACCTCCA…
>Novel01090
AAAACGGCATTCCAAACACACACTGGGCACTATGAATTTCGCGTCATGGCTTTCGGTCTTACTGGGGCCCCAGCAACCTTTCAAAGTGCCATGAACGCCACATTACAGCCAGTGCTTCGCAAGTTTGCCTTAGTATTCTTCGACGACATATTAGTTTACAGTCGATCTTTGGAGGACCATGTGGAGCATCTGTCGGCAGTACTTCACTTGCTGCAGAAGGATAACTGGAAGGTCAAACTGTCAAAGTGTACCTTTGCTACCCGTTCTATCAGTTATCTCGGCCATGTCATCAGTGCAGCAGGTGTCCAAACTGATCCTAACAAGGTGACTGCAGTGGTTAACTGGCCTAGACCTTCCAATGTCAAAGAACTCTGTAGCTTCCTTGGTCTAGCCGGATAC…
>Novel01092
CAGAGAAGTCCGGCTGGGAGAAGCGAGCAGACTTTGCCGGATTTCACGCAACCAAACCGCTCGACGCTCGGGAGCATGTTTGTTTAGCGAAGACGGGGCGGCTTTTAATTGCATGCAGATATCACTGCGATGATATTTACGGTTTTAGAATTAAAGAAAACAAGAAATACACCCATGGCATGATCACGTGAAGGGAGTTGGAAAAATAAATGGGCCCGCACAAGTGCCTTTGGTCGACGTGATACCAGCCCTACAAGTTTTGTCTGGAAAAAGAAGCGCCTCCGAGTTGTGCTGGGTGTGGAGATCTGAGACGGTCGTCGGCCCACTTGGTTGCCTTGCCTTTGCCTTGCCTGCAAACATACGGCAACCTGCTCCTTTTTTCGCAACCCCTTACTTCCG…
>Novel01097
CACAGCTACCCTACCGACAGCCAGCCGCCTAGCCACACGCACACCCCGCCGTCCCGTGCTCCCGGCCGCCACCGCACACACGCACAGGCCACAGGCGCACCGCGCAGCGCGCACAGCACAGCAGCCGAGCAGCGCTTGGACGAGCACGAACGCCGGTCACCGGCTCACCGCTGGCACTGGGGCCGTCATGATTCTGCACTTCTGCTTCTTGGTCTCTTGGATCTTGGTAGTGCAGCGGCCGGCCAGGGGATCTTTCGGGCATGAGGATGGACTTTGCTGATTTGAGATGAAGGCCTGATTTCACGAGGAAGATTTACGTTGTTGTTGCCCTCACGGTCATGTGCATAATCATGCAGTTCAGCATACAAGGGCAAAAGAACCTTATGGGGCCGCACTTCA…
>Novel01101
AAAAACTCTGCCAGTCTTTTGGACAAGTAGTGGAAGTGATTACTCCTAGATTTCTTTGTGCTAGCTTTTGTTTTTGCTTTCTTCTAAATTCAGAGTTTTTTCTTTTCTTTTCTGTAGGTTGAACTCATAGCTGATCTTCATGTTATCCATGCTAGCAATGTATTGCGTTTATTCATATTTCTCTTTTATAGTAGGGTGGGTATATGTGATAAAGCATGTATTCGATAAAGCAGATCTTTCCAAGTAGGGAACTAAATTGAAAATTGTATTTTATGAACTTTATGTTTAGTTTCATGGATCAGTTTGAGGCATAGCTAAGTATAATTTATATGATTACACTCACATCCACTTGGTGTTTTTAAAATGTTTGCAACGGTCCACTATTGAGTTCGAAATACT…
>Novel01103
CAGCAACCTCGACGGTCGGCCTCTCTCCCCTGCTGTCGCTCGCCCTACAGGGATGGAGAGCAGCCGTGCGCTCCCTGCAGGCAAGCAGAACCTCCAGCCGAGCGCGCTCCCTGTCCTTCTCCTGGGCGTGTCCCCTGCTCCACGGCCAGCAGCAAGCCAGCGCCCCTGCAGCAAGGCACCCTCTTCTTCTCCCTGGCCGCCCTGCTCTCTGATCCATGGCGCCCAGAAAATTCCAGCCGGCTCCCCCTTCTTCTTCCTCCAGCCAGCAGCTCGTCCACCTCTCTCTCCCATGGCATTTCCCCCTGCGAGTAGCGCTTTCTCCGTTGTCTTCAACCTCCGGTCGCTCCCATCTCCCTGCAGCACCCTGTCCATTTTTTTTCACCCAGCCGATTCCCTCTA…
>Novel01106
CGACCTTCTTATAAGTCTAAGTAACCCTTCTATACTTCTTAATGAGGATGGTCCCTTGAGCTAGCATATATTTCAAACTTATACTTTTGTAATCACTCCGATAAACTAATGTAAAATTTTTGTAACCTGTAAAATTTGGTAGTAAGATTTACGCTGCAACAATATTGGTGTGTGTGATTTGTGTTACTTAATCCCGCGGTTCTGGTTGTAAGTGGTTTATCCGATGTCCTTGGGACACTCGGACGGATCCTGTTAAGTTATTTGGTGCACATGCATAGTCGTCTGAGGTCTTTGAGACAAGGACAGGTGCATGTGGGCCCAATAACTTGGGAGGTTCTGCCACACTGGGGCTAGGCATGCCGCTTTTAAAAATTTGCTTTGCTTTTAAAGATTTGCTGA…
>Novel01112
GAAAAACTGGACAGTTGCAAAGGTAGTCATAACCTTGCAAAGGAACATACCATGTCTTTTCTGAAATTCGAATGCAAATGAACACCTCATCCAACAGAATGTTCAGGGAGGGAACACCTTTCAGAAAAGAAGAGAAACGGAGTGATGGAACTCAACTGTGAAGGCTGCGTCTGCGCTTAGCTTTGTGAATATGGTGATGGATCTTATGGTCATTCTTGAATTTGTCCATGGCACCATTCATGCTAAACAACCTGTTCTAACCATGTGGAGGGACACTGGTTCTGGGTGTTCATATGTTTTTTTTTTCTGGAGCTGCAAATGCTTGGGGTAAACAAGCATTCTGATCGTTTTGCTGAGCTGCATTACAGCGACAAATTTGATGAGCAATAGAGGCAGATT…
>Novel01131
CGCTAGCCCACAAGTCCCCGAGGGCTGCCGCGTCTGCTCCTAATGCAATCCCTAACCCACTCTCCCACTCTTCCTCCCTCTCGCTCCTGGCTCCCTCCTCCCTACGACGGCACGGTGCACACTCGGCACCTCCTCCCTCCTCCTATGTTCTTAAGGGGCTCAGTGAGCGGCGGGTGCAACGGATGCAGGAGCGCGTGGTGAAGATGATCCCGCGGCTGGTGTACGCGTCATCGTCCGATGGGTTCGGCGACGGCATGGAGGACACCCTCGATGTGGTGCTGCGCGGCGTGCTGGAGCGGTTCCGACGGCGCCGGGCGAGCACCGCGCCTGTAGGTGAGTTGCATCGGTTCTTCTTTGCTAAATTTTCTTACCGAGTGGAGCAAATTTGATTATGTGGAC…
>Novel01138
AAAAGGGGTTGCCGAGTCCTCCCTTCCCCCTCCCTTCTGGATCACGCCGCCTCAGCCCTTGCACGTCCCAGCCACGCTCGCCCACTGTGTGCCGTCGTGGTGAGAAAGAAAGCAACGCCGCCGCCCTGTACCTGTGCGCTGGCGGGCAGGGAAATTATCGCCTGCACGTTGAGCGGACCTGGGCACCGTCGTTCAGCCGGATCGTGCAGACTCAGACGGTCTTTATGCGGTGGGCGCCATGGTGCGCTGTGCATGCTCGATGCGTAATCGCTCGCTCGGGTAGCGACTGGAGCTCGGGTGCTCGACGTCATGGTTCCCCGCCGCCGGGGACCAGCAGGTATTCAGTCGCCGGGGCCCAATCCGGTGTCCTAGGAGTGGTGCCTCCACTCGATGGTGTAT…
>Novel01139
CGCACCTGACCCCTGTCTAGCTGCAGTAGCCAGTAGGAAGCGTTCTGGCCTTCTGGGAGCTCCATGAGCTGAGCGCAGATGGGCTGCCCCAGCCTTTCTTGATTGCTAGGAGTGTTGCTAGCTCTCTTGCGTTAGTCTACGCCATGGATTGCGAGCTGGAGTTGGAGCTATGAGATTTAGGAATACTAACATTTCTACTAGTGACTGATGTTACGTTGTTCTCATGAAAAAGATGTATCAATACTATGTCTCTACTACACCCTCATCATCATCTGTTGCACCTTCCTCAACTTCAGCAGTTGACATGATTAAGTCAAGTATCGAAGAAGAGCTTGATAGCTACATATTTGATGGACAAGGTCATGATGATTCTATTGACACAAGTGACTTAGAAAAATA…
>Novel01143
TGAGCAAATAAAGAGTGAGACACGATGATTTGTTTTACCGAGGTTCGGTTCTTGCAAACCTACTCCCCGTTGAGGTGGTCATGAAGACCGGGTCTCTTTCAACCCTTTCCCTCTCTCAAACGGTCACTTAGACCGAGTGAGCTTCTCTTCTCAATCAATCGGAACACAAAGTTCCCGCAAGGACCACCACACAATTGGTGTCTCTTGCCTCGATTACAAATGAGTTTGATCACAAGAAGAATGAAGAAAGAAAAGAAGCGATCCAAGCGCAAGAGCTCAAATGAACACGACAAATCACTCTCTCTAATCACTAAAGCTTTGTGTGGAGTTGGGAGAGGATTTGATCTCTTTGGTGTGTCTTGTATTGAATGCTAGCTCTTGTAAGGTGTAGAAGAGTGG…
>Novel01148
AAGGCAGAGAGTGAAGTAGCCGGCGTCGACCCGCGCCTTGGTTGTCGACGAGCCTCTGTGAAGCAGCCGTGGTGACTCGCCCAAACATGGCGGATGTGCACATGGCTTAGTCCAGTCTAGAGGATCATCTCGGGCGGGTGGATTGCTCACCAAGGTCCCTTCGGCGCCATGAATCCACTGGTCATCATGGGCCAGCGTCTTCGTCGACATCCCCAATGCTCGGACAGAGAAACAAGGAAGACGAGTGTGGAAGAGCAGAGAATCCAAGCTCGACACACTAGGCTTTACGACGACACGCCATCGCTCGGCCGTTGACGCGTCACCGTTAAGCATCACCGGGCTTCACGGAGGCAATCTGGGACACTAGAGTAAAAGGGATTCTTCATCAACGCCATTAGC…
>Novel01155
GTTCGCTCGAATCCACCGCCGCTCCTGCCCCAATGGCGCACGCCCACCTCCTCAGCCATGGAGCTCACGAGCATCTCCCTACGCCCTCTGCTATCTGCTGTTCTCATCCTCCCAGCTCGCCTCCTGTCCCCAACCATGGAGGTCGGCCGCCTGTTCCTCTCCGCTGCTCGCAGCGCCCGGATCCTCTCCCCGTGAATCTCTCTGCTGCCCTTTTTCTCGCCGGTGGTGTTACCTCGGGCTCATCTTCTTTACGCTTGTTCCCTGCTGAATCGCGTCCTGGAGCTTGCCCTGCTGCTGCTCGCCCATGGCGCCCTGTCGAGCTTGGCTCCGTGCGCGCGCTTCTTCTCCCTCAGCTCGCTCCTCCTGTGCCGCGCCCCAGCTCCTGATTCGGCTCTGCTC…
>Novel01158
AAAGCTTATCAGCCACGTCCCAACCAAACTCCTACACGCCATCTTCTTCCTAGGCCGACGGCCTTAGCCTCCACGCCGGCTGTCCTTGCTCTGGTTTCTCCCCGGCTCCAGCTCGCCAGCCGCGCCCTCCCTGCTCGCCCAGCCATCTCCTCGCCTCCATGGCCGCTGCACCAGCCGAGTCCCTCCCCATGTCAGCTGCAAGCACGCCGTGCTTCCTTCCCATGGCCGTCTGCAGCTTCTCCCATGGTGAGCTCCCTCCAGTGCCCTAGGTTTCCATGGCCGCCCCTCCCTCATCTTCCTCCCCAAGCTGAGCTCGCCCAGCCCCTCTCTGCTCCCTGGTTTCTCCCCACGCCAGCAGCCATGGCACCTCCTTCCCCTGCTCGCCCTCCCTCTGTGCCC…
>Novel01160
AAAACGTCTGCAGCGGTATCCAGTACCTCGTCCTGTATTATCCAGGGGGGCGGCTCCATCCCGTAGATATGGGGGACAAGAGAGCGTCCGGCAAGTCCTCCAGCTCCCGGCTCCTCCTCTCATTCGCGTGATTGGGCATGGACCCGTAGGACATAGAGGATATGCCTTATAGGATACCGTTGCGGATAAAATTTATTTACGGGAAGAAATCTTTTGGAGGAATCTTTAAATTAGTATTTAGGGGATGCAATATACAGGCTACCGTTGCTACCAGTCTTAGGGCTAGTTTGAGAACCCTTTTTTCCCAAAAGATTTTCATTTTTCAAAGAAAAATTAGTTCATTTTTCCTTGAGAAAATAGGAATCCCTTAAAAAAATAGTGTTTTCAAACTAGCCCTTA…
>Novel01179
CGATCGGGTTGCTTGACCCAGCCGACTCGGTCATTGGCCCTCACCTGCATATAATCCACAACCACCTCTCCGTTGCGGCCCCGCGAAACCAGCGCAGCCACGAAGTCGAGTTGAGAACCACCAAGACGCCCTGTGTAGCGGGACAGAGGGGAGAGTGCAGCCGCCATCATTGATCCGCCACGGGCGAAATCATTGAGCGTTGTCGCTCCAGCACCGGCAGATGGCTTTGAAGCTTCGCGGGATCAAATCGAGCGTGTGTGTGGTGGTGGAGGTCACGGTGTATAGCGGGCAAGATGTGAATTGTTCGCCAGAGCTGGGGATTTCCGCCATGGCCATCCTTCCTCGACGACGGGACTCTGCCGGATGCCATCATTGTAAGGTCACGAGGATCTGAAGAAT…
>Novel01184
CATGGCGATTTCCCCTGCGAGCTCCCCTCTCTCCCATGGCTGACCCTCTGCTCCCTGCACTTGGCGTCCTTGCAGCAGGCGAGCTCAGCTCCACCTCCCTGCGCTCAGCTCATCTCCTTTGCCCAGCGCCCTCCCTCCTCTCTGTTTTTCCTTGAGCTCACGTGCAGGGAACGACGCCCTTTCTTCTCCACTGTGCTCGACGCCCCTCCATTGCAGGCCGACGCCTCTGCTCCGGCCAGCAGTCCTGGCGTCTAGGTCCCCTGCGTCGCCTTCCTTGGTTCCAGCCGCCCCTCTTCATTCCTCCCCTGCTCCTACTCTCTCGCGCGGCAGCAACTCCCATGGACGCCCAGAATTTTTCCAGTGCCCTGTTCATCTTCCTCCCAGCAGCAGCAGCAGTCC…
>Novel01188
CCATCCTCCTCTTGCCAGGGCGCCGTTGCTGAGCTCGCCCTGCCCCCATTCATGGACGCCGTCGGGTCACCCGTTCCTATCTCCCCTCGCCCTCATCCTCTGGCTGCTGCCCCTTCCTATTCCTGGTGGTTGAGTCTTCTTCCATGGACGCCAATAGCAGCAGCCCACTCCTTCTTTTGTTCTCCATGGATGAAAGCCCAAGCATCTGTGCCTCCTCTAGGTTTTTGTACAATCGCAGCAGCACGTCGAACCTTTACAACCCCGGGAAATTTAGATGAGAAGAAAGCTATAGCGAGGCGCTTGCCAAGTGCTTGGTGAATCGCCTCAACCGGATGTGGTTGTCGATCTCGCGGAGTCGAGTCGAGTTTAGTCGTGGTTGAAGATACAAACTCATACGAA…
>Novel01201
CGCGTCTGCTCCCTCCAGCTCGCGCCCGTGGCTCCCTGTGCTCGCTGGTGCTTGTCCATGGCTCCTCCTCGCCTCTGCTCTATCCCCTTCTCCACGCCGTCGTTGAGCTCGCTCCTGCCCTCTTCCTGGTGGACACGCTCGCCCTAGCCCCCAGCGTCGACCGCCCCTGCTCCCTTCTGCAGCCTCAACTCCCTCACGGCTGCTCCCATGACCTTTCCATCCATGGCCCTCACCCATCTGAAGTCATGGAGCACGCCATGGCCTCCAACGTTGTCGGTCTCCGGAGCGCCGTGTCGCCGCTCCTCTACCATTTCCTGGTAGATTGGACCGGAACAGACTAACGGAGCGGAGTTCTGCTATTAATCATTGTACGCTAGATGATTATGCGATATGAAGGGC…
>Novel01202
CGTCATCATACTTGCCTCATCCTCATATCTATCATGGGGTGAACCCCGTTGCGGTGCCCGACCGCCTCTTCAATCCGGTGTTCGTCGTTCTTGGTACCGATGAGCTCCTCAACCAAGGCGCAGTGAGTCCCCTTTCCGCTTTGTTCTTCTCTTCCCCTGTCCTTTTCCCACGGTGAGCTCCTCAACCCAGGCGCGTCGCTTCTATGGAGACACTTCAACGACATCTTTCCGGATTCGCCAGATCCAGCTCGCGCATAGGGAGCTCCTTCTCCTGTTCAGCGAAAACACTCCACCGGATCGGATCTAGCTCGTGCGTTTGATTAGTCTTGTGTTTCGTATCGAAGCAGCTTTGTTGGGTTTGGTTGCTGCTTGCTCCCGTTGAATTTCCAAGACATGGAT…
>Novel01203
GTCAATGTCTCTGTTGAAGAACAAGTTGCTATGTTCTTAAAGTTTGTTGGTCATAGATGGACAAATAGGTCAGTTGGGTTTGAATTCATGCGGTCCGGAGAAACAGTTAGCAGGTACTTCAACCTTGTTTTAGATGCTCTATGTGTCATGTCACGTGACCTCATTACCATGAGAACCACAGAGAACCACAGGGACACAACCAAAGGTCTCGTAGGTTGTTAGAGGATGCTCTATTTGAGTCATGGGTATTGAAGCATTTAAGTGATTTGGACCTGTGAATCGACTAGGTTGATCCAAGCAGGAGGTGAATGTGTGATGGTTGGTTATTTTGCATTTCTTCTAGGTTGATGCATGACGGTTCATGGAGAAGGCTGGTGGTTGTGATAGCTATCACACACT…
>Novel01204
GGGGAATCCCCTGTCGCTTGATAAAGCATTAAAGCGGCCGTTCGCGTTGTCGTGGTCGAGGCGGCAAGCGGCAACGGTGGCATGGAGAGGAGGCGGTGGCGTTCGACGATTCGACAAGCACGGCGGTCGACTGGAGAGGAGGCGGTGGTGGCCGGTGCGATGCTTCCCGCAAGGGATACTGCTGTTCTCGTCGTGACTCGTGATTGTACGTTACAGGATGTCTCTTCGGCGGGAGGATCCTACATGACATTTATGATTTAGCCGACGATGAAGCTCTGGATTCTGACAGAGGAGGAGCGTTCCGAGGTACAAATTTTTTTTTGGATCTAAAACCTCGAGTGAAGAAGTTGGATGTCAGATTCGCTTTTGCTTCCTGTAGCATGTTAGATTGATCTGTAG…
>Novel01209
GCTGCCCCTTCCTATTCCTGGTGGTTGAGTCTTCTTCCATGGACGCCAATAGCAGCAGCCCACTCCTTCTTTTGTTCTCCATGGATGAAAGCCCAAGCATCTGCCCCTCCCCTAGGTTTTTTACAATCGCAGCAGCACGTCGAACCTTTGCAACCCCGGTGAGACCAGCTGCTTGCGCTATGTTTATTCCCCACCAATTCCTATATTTGATTATTTACTGTATATGTTTGTGTGTTTGTGGTGGAGGTAAATCCTAGGAAATTTAGATGAGAAGAAAGCTATAGCGAGGCGCTTGCCAAGTGCTTGGTGAATCGCCTCAACCGGATGTGGTTGTCGATCTCGCGGAGTCGAGTCGAGTTTAGTCATGGTAAGTCGATCCATTGTTTTCATTAGTCGGAT…
>Novel01215
CTAATTGATGGCGATGTGCCAATGTGGTTCATCCTTGCCTCCTGTATTTTCATAAGGATAATCACTGAATTTGAATTAACACTTAATAGTTGGGCACTTACAAGAAATCAGATGTGCAATTTTCACAAATACAATTAATTAATGAACAAATGTTCCGATTCAACCAATTCTGTTTGTCAAGTCCACAAAAGGTATGATATGTCATGGGCTCATGGGAATTGCCATTTGACAGATTGGGAAACTGAGATTTTAGTAGACATAGACAAAAAAAAAGTAAATCGGTACAACCAGCTGCAGCGCGCCAACCACAAATCCTGATGTGCTCTTCGAGTTTCCGTGAGACGACCAGCTGCCCAGGCCAGATGAGATTAGTAGCACTCAGCACTCACCAGCGGGCAG…
>Zm00001d012859
ATGGCCAACTCCAAATTTGGATTGCTCGATCTCGCGGACGGCGAGTCCGGAGAGGCCGCGGTATCCGTGGCCATCACCAAGGTCGAGGCCGCCGCCGCCGCCGCCGCCAGGAAGGCTGAGGCCGCCTCCGATGCCGCCGGGACCGGCAAGGAGAAGGCCCCGCATAAGAACCACCTTTACTTCACTAAACTCCAGTTAGATAATGGTACGTGCATACACACAATACATTCCTTATCCGGCTCCCGGTGTATGAGAAATATTGAGCACGAGCTGAAAAGGTTGAGAGATGTACTCATAAAGCTGAGGGGAGAGGAAACAAAGCTTAAGGAGAACATGGAGGATGGAGGCCGTCTCATGCAGTTGTTGTCGGAGGAACAAAGGAAGCTGAGACAGGAGCAG…
>Zm00001d012897
ATGGCGACACTGTCGTCGTCACTTTGCTCCAGCTTCGCCTCCCTGCGGACCGCCTCCATCGGCCACCCTCGCGTCATCACGTCATCTACGCCCAGTTGTTTGAAGCCCCTCTTGACGAAAAAGAAATATCGCTACGATATAGCTCTGCTCTTGGATAAGGTGCTACAAATGTATAGCTCTGCTCTTGTTCAAGGTGCACCAAATCCACGACGGATCATCATCCGTGCAATTGATCCTACACTTGCTGTTGTTGCTTATAGACGTGGGCAGTGTGACGATGAACTTATTAACGTCACTAACAAGAATTCGTTATTCAAGCTGCAAGCTAGGTATGTGGTTGAGAGAATGGATGGTGATCTGTGGGATAAAGTTCTTCAGCCCGAGAATGAATATAGAAGG…
>Zm00001d012924
AGAGGGCTCATCGATTCATTCAACTGAACAGCAAGCGCACCTACCCTACCCGCCGCCGCCGAAGGCGAAGGCCTAGCTCCCGGTCCGGCGCGATGGCTGCCGCGGCCCGCCGCGGCCCCGGGGCGCTCCTCCTCGTGGCGCTCCTCCTGCTGGCGCTGGTCGTCTCCGGGCACTGCCTGGACGCGCACCACCGCGGGCTGAAGCGCCGCCGGCGGAAGCACGAGATTCACTCTCCGATCAAGACGGTGGTGGTCGTGGTGATGGAGAACCGCAGCTTCGACCACATCCTCGGCTGGCTCCGCCGCACCCGCCCCGACATCGACGGCCTCACGGGCCGCGAGTCCAACCGCCTCAACGCCTCTGACCCCTCCTCCCCGGATATCTTCGTCACGGACGAGG…
>Zm00001d012929
AGGCCATCCTCGGCATGCGACGCGGGGCCCGTATGACCCAGCCGTCCCAGCGGCCGGACGGCGACACCAACCACGCCCCGTTCCGTTGAACAGCGTCGAGTCGTCGCCCCATATCAAACGCCCACGCAGCGCCGGGGATGGAGCGCGGCCGGCACCAGATGAGAGCTGCCTCCCACACATGGCATCGTGGCCAGCAGCGTCAAGGAGGCGGTCCAGCGGCGGCATGAAAAGCGCCGAGCTTTCGGGCTCCGGTGCTTCTTACGGCTATGGCCGGACGTCCTCCTCCCCTGATGCCTGCGGCTACGGCCGGCAGTTCTCGGCCTACAGCGCCCGCTCCTCCCAGGTCAGCAGGAGTGGCTCCTTCAGTGCGGCGGCGCAGCGGGTCGCCGGCGCCTTCAC…
>Zm00001d012953
GTGAGTCCGTCTTCTTCAACTCCATCGTCGGCGTCGCGCGCGCGGAGTGTTTGGTTGCTCGGGAGAGGAGACTATATATGGAGACGACCAAGAGCTTGGAGGTTGCTAGGGGCGCCATGGACGACGACGACCACGAGGAGGCGTGGGTGCACGACTCCTCCGTCGATCACCGCGGGAGGTCTCCCGCCCGCGCCACCACCGGGTCCTGGAAGGCCGCCATGTTCATCATCCTGATCGAGTTCAGCGAGAGGCTGAGCTACTTCGGCATAGCCACGAGCCTCATGATCTACCTCACCAAGGTGCTGCAAGAGGAGATGAAGGCGGCCGCCAAGAATGCCAACTACTGGATGAGCGTCACCACGCTCATGCCCCTGCTCGGCGGCTTCCTCGCCGACGGCT…
>Zm00001d012972
CGGCCCTGCCCCGTACACAAACAAGGCCGTAGCCCGCAGCTTCGTCTGTTACGCTACGTCCGGTTCCCCACCGCGCCGTGTGAAAAAAATGGCTGTGCCGGAGGTGGTGGTGGACGGCGTCGTCTTCCCGCCGGCGGCCCGCCCGCCGGGCTCCGCGGGCTCGCATTTCCTCGGCGGCGCAGGCGTGCGTGGCCTCGAGATCGGAGGCAACTTCGTCAAGTTCACGGCCATCGGCGTGTACCTGGAGGACGCGGCCGTGCCGGCGCTGGCGAGGAAGTGGGCCGGCAAGACGGCCGGCGAGCTCGCGTCCGACGCCGCCTTCTTCCGCGACGTCGTCACGGGTGAGTGAGTACTGTAGTACTACAGACGACTACAGAGTCTGAAGAAGGTGCCTCGTTG…
>Zm00001d013013
ACGCCCGAGATGCATGCGACGCGATTTCCGTTACGAAACCAGGATAAGAGACGATAACGCACGCCCACACACACCGGCGCTGACGCACGAGAGCGGCCACCACCATGGCGACGCCCACCGCGCTCTCCACCTCACTCCCCTACCTCCCGCCCCGCCGCGTCATCTCATTCCCATCCGCCGCCGCCGTCTCCCTCCCCGTCACCTCCCGCCCCGCCCGGCTGCGGGATTCCCGCCTCGCGGCCGCGGCAACCTCGGCCTCCGAGGTCCTCGAGTCCACCAACGGCGCCGTCCCCACTGCGGCCAAGGACGGCGCGTGGCGCGGGTATGGGAGGGAGTACTTCCCCCTGGCTGCCGTCGTTGGGCAGGATGCTATCAAAACTGCTCTGCTGCTTGGGGCGA…
>Zm00001d013033
GGGCCGCACAAAATTCGGTTGGTGAGAGGAAGTGACAGGCAGGGCAGCGCGAAAGCCAGCCACGGGGACGGAGCGGCTAGCGAGCAAGCGAAACAGCACTATACAAGTCGTCTTCTTCTCCGTCCCTTGGGCCACCTGGTGTTCTTCTATACCACGCGTCCACGCCACTGCTAAGCTGCTCCCCGTTCGCCAGGTCGGCGACCAGGCGAAACGTGCTGCTGCAAGAAGAAGAATAGGTACACAGACAGCATGTCCGGAGTTCAGGCGATGCCGGCGGCCGTGGGCGTGGCGGGGCTGAGAGGGTCAGGGTTGGTTAGCAGCAGCAGTACCGGCTTGTTCGCCGGCGACTGCAAGAGGAAGGCTCGTCGCCCGGCGTGCTCGGCCTGGGCCCTCAGGCAG…
>Zm00001d013035
CTCCTGTTCTCCAGGGGCTGCCTCTGTCGGACCACTCCACTTCTTGCTTCCAGCAACCGTTCGTCTAGCCGGCCTGACGTCGCGGCGCCCAACACGGCAACGCGCCTTTTTCTTCCGCACGCTGCGCTGGCCCCCTTCTCTTGGTAACTTAGCCGTATTGATATATGCACTGATGACTGGCCAGAGGCGACGATGGAGACGTTCCTTCCGCGGCCGCACGCGCGTCGTTCGACGAATTGCCGGAGCCAGCTGAAAATCGCCGGAGGTGCTCTCGGCGGTCCTGGCCTGATTCTCTACCGACGCGAGCTGTGGTCAGTAGCCACGTCTGTATATCCACGTCTAGCTGGCCATCTTTGCACCCTCCCCACGTCCATGGACCCTCCAAGAGGTGGAGCTTCC…
>Zm00001d013052
CCGTCCCAAGTTAACCTCTCGTGCTCGGGCACTTTCTTTTTCCTTCCCCCCTGTGCGCTCGGCCGCCTCCGCCGCTGCCTCGCTCCCTCCGCGCCCACCACGGAGGCGCACGCGCGGGCGCAGCGTCCCTCGCGTGCCTCGCCTTCCGCACTGCTCTCCTCCTCCTCCTCCTCCTCCTCTAGGGTTAGGGCACGCGTCGCGGGGGCCCGTGGCGCCCGGCGCAATGCGGAGGCCGTCGGGGGCCGGCGTGCCGAGCCGCCGCCGCCGCGCGATCCAGGTGCTCGTGGCGGTCTCCCTCGCCTACGCGGTCGCCGTGCTGCTCCTCGAGTCGCCCCTCGTGTCCACGTCGCTGCCCGGGGCGGGGGCGTCCGCCGCGGCGTCGCGGAAGCTCCACCTCGA…
>Zm00001d013114
ATGAACAGCTTGTTCTCGAGCTCGTGGAAGCGCGGCGTCGGAGACGGCGGGGAGCAGGGGACATCGAGTCCGGCGGCGTGGAGATGTCTGCGCCGCCGGGTGCCCGAGCGGGGCCGAGCCTCGACAGGTTCGGACGTGGATGTCACGAGGACTGGCCCAGGTACGCTGACAGTGGAGTCCATCAAGGAAGAGCTCCGCGACCTGGAGCGCATCCAGCGGTCGCTCCACGACGCCAACGTGGGCGGCAAGTCGCTGCACGACGCGGCGGCCGTGCGCGGGCTCCGCGCGCGGATGGACGCGGACGTGGGCACGACGATCAAGAAGGCCAAGGTGGTGAAGCTCCGGCTCGAGTCGCTGGACCGCGCCAACGCTGCCAACCGGTCCGTGCCCGGGTGCGTC…
>Zm00001d013126
ATGACATCGGAGGAGCATCCCTCGTCTACGTCCTCGGACGGCAGCACGACCATCGGCTCCGACGAACATCTTGATTCCCCGCCATCACCTTCGACGTTCTTCGACTCTCCTCCTGAATCCGATGACTCCGCCGCCTCCTCGCTGCTCTCGGACGGCTCTTCAGAGTCCGAGCCCATCATTTTCAAGAAACCCCGCCCACCCGTGCGCTCGTGGCCGGCCTCCGACGAGATCGCGATCCTCGAGACCGTCGCGTCGCACCGGCAGAAGCACGGGCGACTTCCCCTGGCAGACGACCTCGCCGCCGCGGTGCGGGGCCGCCTCAGCGCGGGGGACCGCCTCAGCGCCGCGCAGATCACCAGGCGGCTGTGCGCGCTCCGCAACCGGTACGACAACACTGTT…
>Zm00001d013151
CGAACTCCTGATCTATCCTGCAGCTGGCAAGTAGAAAGATCGACCATGGTGGCCAAGGTGAAGAGAGACGGAGAAGTGCTCGTCGCCGCCGCCACCGGAGACAGCGAAGAGCAAGACGACTTGGTGCTCCCGGGGTTCCGGTTCCACCCGACCGACGAGGAGCTCGTCACGTTCTACCTCCGCCGGAAGGTGGCGAGGAAGCCTCTCAGCATGGAGATCATCAAGGAGATGGACATCTACAAGCACGACCCGTGGGACCTCCCTAAGGCGAGCACGGTAGGTGGAGAGAAGGAGTGGTACTTCTTCTGCCTCAGAGGAAGGAAGTACCGGAACAGCATCAGGCCCAACAGGGTCACCGGCTCCGGCTTCTGGAAGGCCACTGGCATCGACCGCCCGATC…
>Zm00001d013153
ATGTCCGCGTGCGTCCACTACTCGTCGACTGGCTGCACTGGACGAGCAGTGATCGCCCCCCGAACTTCCAAGACGGTTGCTGCAGCAGTGCAGCGCAACATCCATCCGCGACCAAACTTCCGTATCACCGATCCATCACCGGCCATGTCAGGCGCCGGCGCGGACACAGCGCCGTCGAGCGACGACAAGCGCCAGCACCATCAGCGCACGTTCCGGGACGCGGCGCGGCGGCGGCTGCAGCGGGACGCGATCGAGCGCGCCATCAGGGCGCCGCTGGGCACCGTGCTCCGCGACCACGCGCTCGTGCACCTCCCGCCGGCCGCCGCGGCGCGCCTCCGCCTCGTGCACCCGTCGTGGGCGCTGGCGCTCGCGTCGCCGCTCTTCGCCGTCGCGCACGCC…
>Zm00001d013208
ATGGAGCTACTCCACGCCGTCATCCATGGAGCTGCGACGACGACGACGACCACCACCACCACCACCACGAGCAGCAGCGCCACCGTCACCAGCGGCGACGAGGGCGCCCACCTGCCCCAGGGGTGGGCCAAGAAGAAGCGCTCGCGGCGCCAGCGCTCAGAGGAGGAGAACCTCGCGCTGTGCCTGCTCATGCTCTCCCGCGGCGACCGCCACCGCGTCCAGGCGCCGCCGCCGCCGGTCCCGTCCGCGGAGTTCAGGTGCTCCGTCTGCGGGAAGTCCTTCGGCTCCTACCAGGCGCTGGGGGGCCACAAGACCAGCCACCGGGTCAAGCTGCCGACCCCTCCTGCCGCTCATGTCCAGCTCCCGGCACCACCGGCAGTGGCCCTCTTGGTGGAGGCC…
>Zm00001d013221
ATTGGTCATCTCCAAAACCCCAAACCCTCGTTCAACATAGCCATTATCCGAAGTTCCGAACCCACGCCAAGCCCCAGGGTCCGACCGCAGAACCGACCCAAAATGTCGCCCGCCTCTTCCATGCTCACCGCCGTGTCGCTCTCCTCCCCGCTCCCAGCCCCGCGCCTCCGCGCCGCCGCCGCCGCCTCCTCCTTCGCTCCGCCGCGCCGCGCGGCAGTCGCACTCGTCGTGCGCGCGGCGTCCGCATCTTCCAAGTCCCCTGCCACGGCGGAGGCGGCCCCGAAGAAGAAGAGGGCGACCGGCATCACCCAGCCGAAGTCCGTGTCGCCGGCGCTGCAGGCAATCGTGGGCGACCCGGTTATTCCCCGCACCGAGGTCCTCAAGCGCCTCTGGGCCTAT…
>Zm00001d013231
TGTGTATATGTAGCAAACTAGTAACGAAGGAAGAATGGCGCCACACACTGCCACCGCCACTGTCATACAGATACAGCACACTAGCTAACACCAACTTGCACATCACAGCCGTCATGGATAAGGCCTATGTCGCCGCCCTCTCCGTCGCCTTCCTCTTCTTGGTCCACTACCTCGTGGGCCGCGCCGCCGCCGGCGGCGGCAAGGGGAGGAAGCGGCTGCCACCGAGCCCTCTGGCCATCCCGTTCCTCGGCCACCTCCACCTCGTCAAGACGCCGTTCCACTCGGCGCTGGGCCGCCTCGCGGAGCGCCACGGCCCGGTGTTCTCCCTGCGCATGGGGTGCCGCCGCGCGGTGGTCGTGTCCTCGCCGGAGTGCGCCAGGGCGTGCTTCACGGAGCACG…
>Zm00001d013276
AGGCTCTAGTAGCAAAAGGGAGAGGCGAACCAGCTCAGAGCCGGCGACCGCCACCCCACACCGCATCTCCCGACTCCCGCTGCTGTAGTGCTGTGCACTAGCCAAGCCAGCTTGCATATTCCTTCTCCCCCACGCTTTCCCGTGCTTCCATTCCACCACCAGGGCCGCGGAACGCCCCGCCCCGCCCGGCCCCCGCGCCTCCCCTTTCCACCTGTTCGTCGCGTGCGCATTCGTTCGCGCAGCCAGCGAGCCAGCCACCACCGGCCCCCACCATCGATCGATATCCTCCTCCTGTCTCTCTTGCTGCTAGCTCTCGCAGTTCCGTCCGATCGACTATACTGATCCAGCTCCTGCTATGCGCGGCGGCTAGCTCCTCGACGACGAGCTGATCAATCCGAC…
>Zm00001d013329
GGCTCCGCCTAGGGTTTTAGCACCTGCCGCCGCAACCTCCCTTCTACTTCTACTGCCGCCGCAACCTCCCCATCCTTCGAATCCCATCCGACCTAACCCCGCAACCCGCCGGACGACGAGTGGCGAGGCCCCCGGCCGAGATGGACCGGTACCAGAGGGTGGAGCGGCCGCGGAACGAGTCAACCATCGAGGAGAACGAGATCCGCATCACCGCGCAGGGCCTCATCCGCAACTATGTCTCCTACGCTACCTCCCTCCTCCAGGAAAGGAGAATTAAAGAGATTGTTCTAAAAGCCATGGGACAGGCAATCAGTAAATCTGTAGCTGTTGCAGAGATTATCAAGAAAAGGATCCCTGGGTTACACCAGGATACCAACATCAGTTCTGTTAGCATCACTG…
>Zm00001d013419
CTTTCGCCCGGCGCCCGCAGCCGTGGCTACACAACACAGCTGCGAGCCTGCGAGAACCACCACCAGTGGCGTAGTAGTACCCGTGGCATTCCAACGGGCGGTCGCGGCCGGAACCATAGCCAACCTGCCGGTTGGTCTTACACCTCACGCGCCTCGTAAACGAAAATAAAAACACGCGCCCCGCAAAGTCGTCCTCTTTCTTCCGCTCGCCGACACGGCGCAAATCCCCACAACCCCAGGCCGGCGGACGGGCGGACTCCCACCCACCTCCTCGCGACGACGTGCTCGGCTCGCTTCCAGCCACCTGGCTCGCCGCCCGCCTCGGAAACCCCGCCGCGAGATCCCGTCCCCCGGGCCGGGAGGATGGAGGTGAAAACGGTAAAAGTTAGCAACCTTTCA…
>Zm00001d013445
GGATCCTCTTCGGATCTTCCTTCCCATGGCAAAATTCAGGTTCCGGCCGACTCCTATACATAGGCAGCCAGCCTTTTCACCCTTTTCCCTTCCCCCTCCCCAACCCCCCACACAGACTAGCAAGCCGCGCGCGGAGGCGAGGCGTTCGCACACCTCGCCCGCGCCACCACCGTTCCGTTGCGCCCGCTAACGATCACGCGTTTCCGGTGGGAGAGAGAGTAGGTAGGGAGAGGACGGGACAGGATGCTCGGGTTCAGGCAGATGTCGTGGTCGTCGGCGGAGGCGCAGGCGCCGTCGGAGCAGCTGTGCGAAGGGGTGGCGGCTGTCGTGGCGGCGCGCCAGGGGATGGAGACGCCGCTGACGGCGGTGGCCGAGGCGTTCGAGGAGCTGGTGCGCGGG…
>Zm00001d013489
ATGGACGTGCTGAAGCGCGAGCTGCAGCGCAAGCGCCAGCTCCTCAACGCCGATTTCGGCGGCCGCAAGATCATCCGCCGCGCCGAAATCGAGGCACGCGAGCTCCAGCGCATCCGCGAGGTCGAGCGCCAGCTCCTCCTCCAAAAGCAGCACAGGCATTCCCGCCCGCTGTCCTCCCCCTCCAGTTCCTCCTCAAGCTCCTCGCCCACCTCCGCAGCCGCTGACGCCGACGCCGACGCGTCGCGGGCAGAGAGCGGCTCCAAGGAGTCGCTCCCGAGGGAGGAGGTCATCCGGCGCCTGCGCGTGCTGCGGCAGCCGGCCACGCTCTTCGGCGAGGATGACATCGCGCGCCTCCGCCGCCTCCAGGTCCTGATCGAGGACTCCGGCGCGCTCGCCGAC…
>Zm00001d013500
ATGGTGGTTGGGGAGCAGGACTACTACTATTCTAGTTCCGACTCCGACGACGAGGACGTCAGCCGCTACGTGTTCCTCGCACGGCAGCCCGTGCCCGTGGGCCGCCACCACCCGGAGGAGGACGATCGAGACGCGAGCTTTGCGAATGATGACGACGACGGTGATGGTGGCGATGGAACGGCGGGGGAGGAGGAATCGGAAGGAGGCGTCTGTAGGAGGAAGAAGAGGCCTCTCCTGGAGATCTTGGACGACGACGCCCCGCCGCCGACCAAGAAGGCCCAGGTCGAACTGATCATCGCGTCGCCGCTGGCGACGCAGACGCCACCGAGCGGTTCGGAGTCGAACTTAGCGTCCCCGCCTTTGGCCGGGGAGTCCGGGAGCGAGGGGAGCCACGAGCAT…
>Zm00001d013503
GCCACTCCGCCCCTCCAATTCTCCGTTTCTCACGCTTGTAGGGTTTCGTCACCTCCCTGCAGCCGCCTCCGTTCGTTGTCCGCACCGCCGCCTCCATTCCCCATCCGCACCATCGCCGTCCACGCATGTCGCCTCCGTTCCCCATCCGCACCATCGCCATCCACGCTGGTCGCCTCCGTTCCCCATCCACACCAGCGATTCTGCACCAGCGCCCACCACCCCCGCATCGCCCCCACTCCCGTCTGCTGCCCCGCCAGTCATCGTGGGCTCGGTCAAGCACCTCACGCCTGCGTGGGTCAGCCGTCGTTCCCGCTAATCTCCTTCGCTCAGGCACCAGAGTCACACCATCCTCGCTGTCAATCTCGTCGCAAACCCTCCGCCCCTCTCCGGTCTGGCACT…
>Zm00001d013506
ACACACGCACACATACACTTCTCAAAAAAATCCCTCCCGCTCCCACCGCCGTCTCCTCCTCCCAATCACATTCCGTTTCCATTCGCGCGGCCCGCGCCGCCGTCATGGCCGCCGCCTCCCTCCTCGAGGCCACTCGCTTCCTCTCCACCCCGCACCCACGCTCGCGCTCGCGCCCGCTCCCTTTCCCGCCCGGCAGCGGCCTACACCCCCACCTCCTCAGGACCCCTCGCCTCTCCACTCTCCGCGTCCACCTCCACCGTCCCGCTCCTCTCGGCGCGCAGGAGCCGGCGAGGCCTGGCGCGCTCCTGGCCGTAGACGCGCTCAGGAGGTCCGTGCTCGACTCCCTCGCGGCGCTCAAGCGGCCCGCGCTCGCGCTCCTCCTGGCCGGTGTGCTGCTCG…
>Zm00001d013511
ATCCTTGTTCTGGGCTCTTCTCTATCCTCCCCACACCTTTCTTCTTCGTGCACGGCTGGGAGCAAGCTGCTGCCCCTCTCCCTGGCCGGCGCCCTCTCCCGAGGCCACCCCCTCCCTCAGCTTCGTCTTCAGCCGCCGCCGAACCAGGGCGACCTCCCCACGCCCGCTGCCACTCCCATCCCTCCCCTCTCTGCTTATGGTCGCGTGCCCTAGCATCCGCTCGCCCCTGCGCGCAATCCTCCCCCATGGCGAGCTCGCCCTCAACTCCCTACCACGGTGCTCGCCAGGCTCGCTGGCGTCCATAGCCGCACCTCCCTAGACGCCGCCAGTTCGCCGGTCTCCGGACCGTTGCTCCTCCATCGCCAGGCTGTGAGCTCTCTGCCCCATCACCAGCACCAC…
>Zm00001d013529
CTCTCGCCTCGCCTCGCCTCGCCTCCCCCGGGGAAGAAGAGGAGGAGAGGGAGCTGAGCAGCAGCCGGCCGACGCGGGAATGCTCGTCGGCGGCGGGCGGGACGACGAGGAGGTGCTCCGGAAGCTCAAGAGCATGGACGTGGACAAGATGGAGAACGGCGGCGGCGGCGGTGAGGCGGAGAGCCCGCGCCCCGCCGTCAAGTACCACGGCTGGAAGGCCATGCCCTTCATCATCGGGAACGAGACGTTCGAGAAGCTGGGGACGCTGGGCACGTCGGCCAACCTGCTGGTGTACCTGACGCAGGTGTTCCACATGCGGAGCGTGGACGCGGCCACGCTGCTCAACGGGCTCAACGGCACCACCAGCCTCGCCCCCATCGTCGGCGCCTTCCTCTCCGA…
>Zm00001d013550
ATGGACCACGGCGGCAGGAGGAGGAGCGGCGCCGGCGCGGCGGGGGGCGGCCAGCCGCCGCCGCCGCCTCCCAAGGTGTACCGCGTGGAGCCCAGGGACTTCCGGGAGCTGGTGCAGAGGCTCACGGGCGCCGGCACGCCCGCCGCCGCCGCCGCCGCGACGGGGCCGGCGACCCTGGCCGCGCACCAGAGGGTGCCGGTGACGCCGGCCATGGCCGCGGCGCCGCCCGCGCCCGGGACGGCAGAGCAGTTCGACTACGCGCCCTGGTTCTCCGCGCCGCTGCTCAGCCCGGCGTCGTACGGCGCGCCGGGCTTCGGCGCCGCCGCCGGCTACCCGCACCACGGGAGCGGTGGCCCTTTGCTCTAG
>Zm00001d013554
CCGAGAGCAGCAGCAGGAGGAGGCCGGGGGCCGTTCTCCTGGGCTCCTCTCCTCCGGCTCCGGTTCTCCCTCCGCACGGCGTCGCTGTCGCCACGGGCACTGTCCTACAGTCCCACTCGGCCACTCCTCACTCACTCCCCTCCCGACCCACGTCTAGTCCCACTACCCAACAAGGCAACAACCACCGCGGGGACCCCCGACCCCGAGCTCGAACCACCCCAGGATATGAGAAGAATACATTTCCCTGTCCCTCCCCTACTCCTCCCACTGCCTTTCGTCACATGCGCACAAGAAACCGCGCCGCCCCCGAGGCCTGTGACCCCCACCTCTCCTCCAGCGCCCCGCCAAGCCGTCGCTGCGCCGCTTCCATGACCCTCGTTCCCCTCGCGACGAGCGGCA…
>Zm00001d013557
ATGGCGTCGCCGGTTGTAGTGGCCGCGACGCTGCTGGTGGTAGCACTGGCGGCATTCTGCGGCACGGACCCGCTCCGAACGGACAACATGGTGGACTTCCCGGGGTTTGAGTCCCACCTCGTCGACCTCCCTGATCCCGCCGAGATGCCGACGCACGCGGATGAATGGGAGCGACTCTGTGGAGCCGATGTGCGGTTCTGCGGCGAGGTGCAGGGGCCCGAGAGCATCGCCTTCGACCAGCAGGGCCATACACGGGCGTCGCCGACGGCCGGGTCGTCTTCTGGGACAGTTGTTGCCCTCACCGAGAGCATCGGCAAGCTGCTCGTCGAGGTGCTCAAGGAGCTCGGGAAGAGGGTTCCAGACTCCCTTGTGAAGACCCGCGTCGAGGATGATGGCTTC…
>Zm00001d013573
CGACCCGTTCCCCCTAATCTTCTCCAATCCCTTTCTTCTGGGCTCTGACAGGGTGACGAATCCCATGGGCGCCGCGGCGAGGAAGCCCGCCGCCGCTGGGGTGTTGCCAATCTGGCTCTGCCTCGTCTGCGCGTCGAGAGCGCAGCCGTACATCGGCGTCAACTACGGCGAGGTGGCGGACAACCTGCCGTCGGCGGACGAGACGGCGAGGCTGCTCAGGTCGACGTCCATCTCCAAGGTGCGGCTGTACGGCGTGGACGCGGGGCTGATCCGCGCGCTGGCGGGGTCCGGCATCTCCGTGGTGGTGGGCGTGGCGAACGGCGACATCCCGTCGCTGGCCGCGGACCCGGCGGCCGCGTCCCGGTGGCTGGCCGCCAACGTGCTGCCCTTCGTCCCGGC…
>Zm00001d013595
ACTCAAGAACCGCAAGGAGGCGCCTTTCCGGCGTTGCCCTTGTTTTTTTCCCCTCTCCAACTCGAGGGGTTTTCGATCCGGGGGGCGGTTCCCGGCGAGATTTTTGACCCGGCCCGGTGCTTGGTTCCATTGATCTCCGTCTGCTACTCCTTCCTCCTACTTGGTTGCCTTGCCTTCCCGGTCCCTGATCGGAGCCTGTCGCCGGCGGGCGGGCGGGCTGAGTTTACTGCCCGTTACTGGGGGGACAAAGAGCAGAAGGAACAGAGAGTAAAAAATCTTGGGCCTTGATCGGATCCGAGGACGGGGCAATGCGGTAATAAGGAGCGGCCATCACTGCCGGAGTTTGATCCATCCAAGGAGAAGAAAGAGGAGGGGAGGCCGCGCTTTCCTTTCTTTCTG…
>Zm00001d013606
GCGTCTCTCTTCTTTCGCTCTGTCTACCGCGCGCGCCCGCCGCTACCTGCCAGTCGCGCGCCTGCCGCCAGCGCCCCGCCGCCACCCCACGCGCCGGCTCGTGTACTCCGCTGTCCGCTCCCATTCCACTATGGCCTAGCTGCGTGCTGCTCTGGCATCGGTCGGTGGATAAGCCCAGCAGGCAAGCAGGCAGGAGACTAGGAGAGCTCAGCACTGCACGCACGCTCCCCTCCCCTTACTGGCCAAATCGATCGTCCCCTTCAGGTTCCAGGCTCCGGAGCTTGCTTTACTTCAGGTGAGATTACTTCCCCTCACCTCCGACTCCGATCCCATTCCTTTCTTCCATTCGCTAAGGATTCGGTTTAGATCCGTCTTATGAATTGAAAAACATCAGCCCAG…
>Zm00001d013619
ATGGCGTGGAAGAGGAAGAACGGCAGCGCCAGCGGGTCGCCCGCACGCGGGGCCGGCGCCGGCTACGAGGAGGCGGAGAAGGTCCCGAGAGGCCACGTCCCGATGCTGGTCGCTGGCGGGGACGACGACGGCGATGGTGGCCAGCGGGTGCTGGTGCCGGTGCGGCTTCTCAGCGACCCATCCATCGCGGAGCTTCTCGACATGGCGGCGCAGCGGTACGGGTACGGCCAGCCGGGCGTGCTGCGGGTGCCCTGCGACGCCGGCCACTTCCGCCAGGTCCTCGACGGCGCCATGCACAGATGCGGGATCAGCTTGGCGTGA
>Zm00001d013625
AGAAAGGGCTCCCAGTCCCAGTTCCAACACTCGACCTGCCCCGTCCGCCACCCCTGTGCGTGCCTACCACAATCCACACACCCCAGCCGCCCAACTGGGCTGGGCAGCAGCCATATACTCCACTCCACCGGCCGGTGCGCGCGTCTCAGGCCTCTCCAGTTCCCCACTCTCGCTCTGATGAGGGACGCGGTGGTGGTGATGGCGGTGCCCGGAGGCGGAGGCGGGGGCGGAGGATCGGCCTCGTCGGCGGCGGCGGCGCCGTGCGCGGCCTGCAAGCTGCTGCGGCGCCGGTGCGCGGCGGGCTGCGTCTTCGCGCCCTACTTCCCGCCCGGGGAGCCGCACAAGTTCGCCAACGTGCACAAGGTCTTCGGGGCCAGCAATGTCAGCAAGCTGCTCCAG…
>Zm00001d013644
GTGCTCATCATCACCAGTTCACCACCCACCTCCCACTCCCAGTTCACCCCGTCGTCCTCGGCGCCACCACTCCTCGTCCCCCGGCGCTACTCCCCCGCTCCACGGTCCAAGGGTAAGCGCGCCTCCCCACCGCTCCCTTGCTCTATATAGCCCTTCCCACTCCACCGCTCGCCCATTCCTTCGCTTCCGCTGTCTCCCCGCGCCTCCCGGATCGCCTCGGCGCGCGGTGAGTCTGGCGTGCTGTTGGGCCGCCTGCCTGCCTGCCCGTCTCTCTTCGGTCTGGATGCGTAGCCATTGTCTCCTTCCCGGTCGGGGTTGCTTTGCTGCGCGAGGCTGTGCGGAATTGGTAGTTTTTTTGGTCGAGAATGGCTGGTTCGATTTTCGGGTTCCTTTTTGCAC…
>Zm00001d013648
ACCGTGTCTCCACCACAGCTTCACATGCCCCCGCTTCCGCGATCCTCGCCCCCGTCCCGCATCTCCCCTTCCTTTGTTGTCGCGCCCTCCCGAGCTCCGACGCGCGCCATCCCCGCTCGATGCTTTCCTTGGAGAGCAGAGCGCCGGCCTTCAGAAATCTCCGCCCAAGATCGCGCCTTCTGCTCCCACACGCCCGGTCCACGCGAGGCCCACAATCCCTGCGCCTTCCCGATCGGCTTCGCCCACTCAATCCACGTCCGCGCACACCAGCGCGGCCGCGCCATCCCCGCGCTCTGCTATTCATGAAGAGCACCCTAAAAATCCTAAACCCTCAGCTCCCACCCGCGCCACGGCCATGTCTCCCGCCGTGATCCCGCTCCCGCCCCACCATCTTCGCCC…
>Zm00001d013652
ACCATAAGAACGCACGCGAGTGGCCAGTGGGAACCAGGAAACAAGTGAGAGGGGGAAGCTGCGGCCGACGGCCGAGCTCTTGCCGTCCCTATCCACCCCTCTCGGCTCTCGCCCTCCTCTCTGTCTTTCGCTCCGTCCAGCCGCCGCGTAAAATCCGCGGAACCAGATGCCCTTATCCGCCCTCTGATCGAATCCGGCCAGAAAGGCCGGTTCTTTGTCGTCGTCCTCGGCATCGCCGGCGACCTTGATGGCACTGGAGGCGGGTAGCAGCGGCGGCGGCGGGAGGGGATGGGGTGGCAGGTTCCGAAGCCTGATGCGGCGGAAGCAGGTGGACTCCGATCGGGTCCGCGCCGAGGGCCAGCCGCAGCTCGCCAAGGAGCTCAACGTGCCGGAGCTGGT…
>Zm00001d013655
ATGGTCGTCATGGGCAAGCACGATGACGATGAGAAGCAGCAGCAGCAGATGGAGATGGAAGACGTACATGAAGTAGGAGCCGTCGAGGTGCTGCCGCTGGAGAATGAGGCGGAGGCCGCGCTGGTGCGCAAGATCTCCGGCCTGGCCGCCGCCATCGCGAAGCTGCCGTCGCTGAGCCCGTCGCCGGAGGTGAACGCGCTGTTCACGGACCTCGTCACGGCCTGCATCCCGCGCAGCACCGTGGACGTGGAACGCCTGGGCCCGGAGCTGCAGCGCATGCGCGCGGGCCTCATCCGCCGCTGCGCCGACGCCGAGGCCCAGCTGGAGGCGCACTACTCGGACCTGCTGGCGGCCTTGGACAGCCCGCTGGACCACCTGCCGCTCTTCCCCTACTTCGGC…
>Zm00001d013672
ATGACGTCGCCGTACGCGTCGCCGTTCCTGCTCTCCCTGCTCCTGCTCATCTCCATCCCGGTCGTCTTCCTCCTTGCCCCGCGCCTGCTCCCGCCCAAGACGCTCCCGGCCATCCCGGACGCCGACGAGTCCGACGACCTCGCGCTCTTCCGCCGAGCCATCCTCTCCTCCTCTTCGGCCACTCCCACGCCCACCTCCGCGGCCTCCTACTTCTTCCGCCGCCGTCCGGCGCCCAAGGTCGCTTTCCTCTTCCTCACCAACTCGGACCTCGTCTTCTCCCCGCTCTGGGAGAAGTTCTTCCGCGGCCACACCCACCTCTTCAACCTCTACGTCCACGCCGACCCCTACTCCGTCCTCGAGCTGCCGCCCACGCCATCCTTCCGCGGCCGCTTCGTCCCC…
>Zm00001d013949
ATGGCAAGCTGCATGAAGCTGCTAGTGTTGCTTGCCCTCGTGCAGGTCCTGTTGTCCCTCCACGTCCAAGTCTCCGAAGCCACTACCAATAAGCACCACCACCACCACCACAAGCCGGAGGAGCCGGGCTCGGGCTCGGGCTCGGGCACCTGCCGACTCAGCGGCCACCTCCACGGCAAGGCCGGGAACTGCAAGAAGCTGCACGGGTCGGACTGCTGCCAAGAGGGCCACAAGTACCCGCAGTTCCGGTGCTCGCCCCCGGTGTCCGCCAGGACGCCGGCGACACTCACGCTGAACAGCTTCGAGAAGGGCAAGGACGGGGGCGGCCCGTCGGAGTGCGACAACCGCTACCACAAGGACAGCGAGACGGTGGTCGCGCTGTCCTCCGGGTGGCTGCGC…
>Zm00001d014134
CAAGCTTATATACGCAATTAAGTAGGTAGCCACAATGGAGGACAAGGTGCTCATCGCCGTGGGAACGGTGGCGGTGGTCGCCGTCCTCTCCAAGCTCAAGTCGGCCGTGACCAAGCCGAAGCTGAACCTTCCTCCAGGGCCATGGACGCTGCCGTTGATTGGCAGCATCCACCACATCGTCAGCAACCCGCTGCCCTACCGGGCGATGCGCGAGCTCGCGCACAAGCACGGGCCGCTCATGATGCTGTGGCTGGGCGAGGTGCCCACGCTGGTGGTGTCGTCGCCGGAGGCCGCGCAGGCGATCACCAAGACGCACGACGTGTCGTTCGCCGACCGTCACATCAACAGCACCGTCGACATACTCACCTTCAACGGCATGGACATGGTTTTCGGGTCCTA…
>Zm00001d014149
ATGGTCCACAGCCACCGGTGCCTCATCGTGCGCGGGGAGCGCCCCGTCGACGGCAACCGCTGGAGCCGCTTCCGCCTCGATCTCCCCGTCCCCGACGGCTGCGACGCCAAGGCCGTCCACGCTAGGTTCGACAACGGCGTCGTCCGCGTCACCATGCCTGGCGTCCAGCAGCCGGAGCCCGTCCTCCCGGTCGTCGCCGGCACCGCCGACCAGCAGCAGCAGCAGCAGGAGACGCCGCTGCCGAAGCATGCTGGTACGGCCGCTGCCGCTGGCGACGACGACGTGCAAGGGCGGAAAGGCGTCGTCGGCGCTGCGGGGCAAGACGGCGGTGATCGTGATCGTGCCGCGGGAGGGCAGGATGAGGTGGACAAGCACGAGACGCCGCGGAAGCAAGAAGCG…
>Zm00001d014193
ATGGAGATGGCGCGACCGGGAAATGGTGGAGGAACCTTCGACGACGCCGTGACCTGGAGGCGCTGGAACGGCTTCCTGTCGTCGTACCCTGACATGGGCCGGGACTCCGACGGTGGCCGGGCGGCGCTGCAGCCGTTGCCGGCGCATGGCGTGGGCAGCCGGCGGCGCACGTACGCCGACGGCGAGCTCGACGTGTTCTCTGCCGAGCGGTACTTCAGAGGCGCAATGGACTACGGCAACGGGGACCGCAAGGAAGGTGTCTTTGTCACCGCCCCCGCGGTAGCGGGGCAGGTGCCGCAGCCCTTGGTGGAGACGGCCGCTGCGAGGCCGGCGGCGGAGGCCGTGGTAATGGCTAAGCCGTCCTGGACTCGCGCGTCGACCGTGAGCTTCACCGCGAGC…
>Zm00001d014204
GCCCCCATGCCGCCTCCTGTATGTATGTGGAGCACTGGAGCCCTGACATGATTATCCTGAACCCGAAAGCTGAACTACCACACACAACAAATAACTGACGCAGGCGATCCATCACTCCACACACCGGTCGGAACCGAGGCCAACCAACGACGCCGCCGCCAATGTCGTCCCCTGCAGCGCCGGTGCAGCCGCCGCCGCCGCGCGCGGTGCGCTTCGGCGTCCTGGGATGCGCTGACATTGCGCGTAAGATCTCGCGCGCAATGCTGATGCTCCCTCCGGGCGCCGCCACCATCGCCGCCGTAGGCAGTCGCTCCGATGACAAGGCCCGCCGCTTCATCTCCGAAATCGGCTTCCCCGCGGCGCGCGTCCACGGGTCCTACGAGTCTCTCCTAGAGGACC…
>Zm00001d014207
CTTGATACAATGCGTGGAGGCGCATCAAAGGGTAAGGCCCCCCTCCGCATTGTGAACCCTTTGGACATCATTCGCTCGAAGAAGCAGAGGGACAACCCTGTTGTTGACCCTACAAAGTCGGTCGAGACTTCGCGTGACGCGGTGGTACCCTCCACGTTGGATAGTCTCGCACATGCAGCCCTCGATGCTTTGCACATGCATCATGCCGAGATCATGGGATCTCAAGACGCTCTACGGGCCATGGATGTGTCCGAGGACTATGATGTGGACCAATTTTTTAATTTGGGTCCTAATGTACCTCTGGAGGAGACGTCGGGAGGGCTTGATACAATGAATGGAGGTGCATCGAAGGTTAAGGCCCCCCTACGCATTGTGAACCCTCTGGACGTCATTCGCTTG…
>Zm00001d014250
GCGGCAGTACATGAGAGAGCCGCAGCGGCATCAGCTGGTGGAGGCGGAGGAGACGGACTCCGGCCGGACCATGCAGCTGTTCCCCACGCGCGCCGGCGGCGGCACGTCGTCGTCGTCGCATGAACAGTCAGATGATGGTGCGCAGGCGGCCAACAAGGCAACGCTGAGCATCTTCTACGAGGGCCGGATGCTCGTGTTCGAGGAGTTCCCGGCCGACAAGGCCAAGGCGCTGATGCAGCTGGCCGCCGGGTCGTCGGGCTCCTCGTCGGCGGCGGCGCCCAATAACAAGGACGCCCCAGTACCAGTGGTGCGGGTGCGGCGGGTGCCAGAGCAGCCGGCAGCCACCGCGCCATTGGCAGTCGTGCCCTCCGACCTGCTGCCCATCGCGAGGAAAGTGTC…
>Zm00001d014261
GTTCTGCCATCGCGCGCTCGCCTCCCTCCCCGCGCCCGCAGTCCCCGCCGCCGAGCAGTCCCGCCGCGCCCCCTCTCCCTGCAAACCCCGCCACGACGCAGCAACTGATCCACCATCGACGCGCGCGCCGCGCGCCCCGACGCGGAACGCTGGATCCCGCGCAGCAGAAGGCGGCCAACCAGTCGCCGTCGCCCCCGGCCCCCACCCCGCCTGCTGCAGCAAGCGGCGTCCGCTACCGCATGCCCTCGTCCCCGGACCTCCTCCTCCCCGCCGACGCTACCAAGATGCGCCGCTACTCCGCGCTGCCCAACGGCGGCCGCCAGGAGACGTTGGCCGACCGCGTGCACCGCTACCAGGGCGTCATGCTCGTCATCCTCGCCTCGCTCGCGCTCGTCTCTC…
>Zm00001d014271
ATACGCCTTTTCTGCTGCCGCTGCATCTTCCACTCGCGTCAAGAAACGAAACCCAGCTGCACCAGCAACTTCTGCCAGCAGACCCAACGACCGAAGCTTTTTTTTTCTTTCTTTTCATCGCCGCCGCTCGGGGTTCAAGGTTCAGCGCGTCCCCGAATGACGGGCACGTACGAGGCCTCCGACCGTCCTCCTCCTCCCAACTCCGCCGGCTACCGGACCGACAAAGTCCGGCGAAAGCGGCTGACGGCGCAGAAGAGGAAAGAGATCAAGGAGGCGTTCGACCTCTTCGACATCGACGGCTCCGGCACCATCGATGCAAGGGAGCTGAACGTCGCGATGAGAGCCCTTGGATTCGAGATGACACCGGAGCAAATCGGGCAGATGATCGCGGAGGTGGAC…
>Zm00001d014278
AAGAAAAAAAACTGCCCGAGGAAAGAAGGCGGAAGCCGACGTGCAACCAGCCCAGCTTAAAAAAAACTGCCCGAGCAAAGAAGGCGGATGCCGACAGACGAGTCGTCCGTCCCAGGCTCCCAGCCCCGGCGCCCCGTCTCAAATCAAAAAAATTCGTCTCAAATCTCAAACCCATAAAAAATACTGTATTTTCCAACCAAGCCACTCGCCCGACCTTCATCCGCATTCCACGCGCACTCCGCTGCCTCACTCCGAGACTCCGCCGCTGCTTCCAACTTCCGTTGCGCACGAGCGAAACATCCGGAGCTAGCAAGGGAGGAGGAGGAGGAGGCGATGGCGGGGGGCGGGGATAAGGTGGACTACGTCTTCAAGGTGGTGCTCATCGGCGACTCCGCTGTC…
>Zm00001d014282
ATGGAGCCAGCGAAGCTCGCAGCTTTCCTTGCCGTCGCTGCCGTCGCCTACGCTGTTGCCGTCGCACCGGCTGCCGCGGAATACTCCGGCGGCGCGACCGCCCCAGAAAGCTGCCAGACGCAAATCATGTACTTCACCAACTGCCTGGCCCGTGATGAGATCCGCGGGCAGTGCTGTAGCGTGGTCGAGAGCCGCGAGTGCCTCTGCCAGCTGAAGCGGGAGGTGGCGCTGCCCTGCAGCCTGCATCGCCACCATCAACGCAGATGCTCCAAGGAAGGGTCGCCTCCACGGTCGGTGAAGCTGGCCGAGCTGCAGCGCCTCCCATGCTTCAAGACACTCAAGTGCTAG
>Zm00001d014292
GTTCGGAAGATGTTCTTGGAGAGCTTCCGGGTGGAGAGCCCGCGGGTGAAGTACGGCGACGGCGAGATCCAGTCGGAGTACCGCTACGACACCACCGAAGTCGTCCCGCCGGGGAATGGCGGCGGCGCGGGGTGGGTGGTGCGCCCAAAGTCCGTCACCTACAACTTCAAGACCAGCACCAACGTCCCAAAGCTGGGGGTGATGCTCGTCGGATGGGGCGGCAACAACGGGACGACGCTCACGGCCGGGGTGATCGCCAACAGGGAAGGGATTTCGTGGGAGACGAAAGAGAAGGTTCACAAGGCCAACTACTTCGGCTCCCTGACCCAGGCTTCCACCATCAGGGTCGGCTCCCACAACGGGGAGGAGGTCTACGCGCCTTTCAAGAGCCTCGTGCCT…
>Zm00001d014376
ATGAGATTCTTACCCCAGGTTTGGCGTGTAAATGATAAAGACAAGGTTCAACTCTCACCCTCTGACCAATCCAAATTTTACACTGGCGATTGCTACATATTTCAGTATACTTATCCTGGAGATGATAAGGAGGAATGTCTTATTGGAACCTGGTTTGGGAAAAAGAGTATTGAGGAGGATAGGCTAATAGCAGTTTCACTTGCAAGCAAGATGGTTGAATCTGCTAAGTTTCAGGCTATCCAGGCGCGCTTTTATGAGGGGAAAGAACCGATTCAGTTCTTTGTGATTATCAATCAGTGCGGGAGTGATGTCGTTGTGGTGCTTTTGAACCTATTATTAGAATGCATCAGTCAAACTCGCCTTCAGTCTAGTGGCGTTGTACTCCCATTTCAACAAACT…
>Zm00001d014559
ATGGCGGCGGCTCCAGAGCGGCCGCTGGCGGTGGACTTCGAGGCGCTGAGCTACATCAGCAGCCTGGTGGAGGCGTTCCAGGCGTTCGACTCCGACAACGACGGGCTGGTGACGGCGCCCGAGCTCCGGGGCCTGCTGGCGTCGCTGGGCCTGGCCAAGTCGGAGGCCGAGGCGCGCGACATGCTGGCGCGCGCCGACGCCGACCGCGACGGCCGTCTCAGCGTCGAGGAGTTCCTGGACGTGATGAACGCCGGGGAGCTCGGACTGGGCGCGCTCGGGGCGGTGCTGCAGTCGGCGCTCCCCACGCTGGAGGCCGCGGGAGGCGCGCTGGTCGGCGCGGACGAGCTCGCCCGGGCGCTCGGCGCCCTCGGCAGCGCTAGCGCCGAGGACTGCGCGGCT…
>Zm00001d014568
GCCGCTTCTGCTTCTGGCGGCCATAAGGCGCACACAAGCTGAACCAAACAGGGGCGCGTCTCTCCTCCGGTACCGGCCGGCATGAGCTCCACCTCATCGGGCCGCCGCGCCCCCTCATCTTCGGCGGCGGTCGCCTCGTCGCCGGGACAGAAGCGGGCGAGGGATGAGGCCAGCAGCGGGTCCCCATCCGACCCCGACGCCGCCAAAAACCCTCGCCGCGCTTTTGCCTCCTCCCCGTTCGCCGACTTCGGCACCTACATGGCTGCGAAGAACAGCAAGCTCGCTGCGCAGTTCGATGCCGACGCCAACACCTCAGGCACGGACGCCGGCGGTCTATTCGATGGCGTCTCCATCTTCGTGGACGGCTTCACAGTCCCTTCTAGCCAGGAGCTGAAAGAG…
>Zm00001d014580
ATGAGGTCGGGCTGGTCGGTGGAGGGGGCGACGGATGTGTGGGTGGACAGCTTGAAGAAGAAGCACAAGCGTAAGAGACATGCCAGTGAGGAGCAGTTTAGCCGGTTCTTGCATTATGAAGTGGATGCAATTAGAAAGGCGTGTGCCAGCTTGGAAGAGGGCTACCTTCCTCTAGTTACATTCATAGTGGTGCAAAAGCGCCATCACACACTGTTTTGTCCTGAAGATCATCGTTCACACAGACAACCAGATCGACGTGGAAATATTTTGCAAGTAACTGTGGTTGACACAAAGATATGTCATCCAAGTGAATTTGATTTCTACCTTTGTAGCCACTCTGGCATTCAGGATGAACTAGATGCAAAACCTGAAGAGCTGGAAGGAGAAGAGTTGGAATCT…
>Zm00001d014628
GCCAGATAGTTGTAGTCGCCCGCCACCTGCGCCTATAAAGCAACACGGCTGAGCATTCATACGCCGGCTACTTGCTTACTACTAGTCAATCTACTGCGTCGTCGTCCTCTGTTCTCGACCCTTCCCCGACCCACGCGGCCACGCCCATCTTCATTTTCCTCTCCATCACGCGCGGTGGTGCATGCGATCTATGTATGTACTAGGGCTAGGCTAGGCGAGCTTCTGGGTGCACGTACCGTACGTCGACTCATCTCCCTCTCTTTCTCTACCGTCGTTGTACTACGTACTACTCCATGTACAGCACTCGTGAGGAAGAGGGCGTCGGGAAGTCATGGCTTGGGCTGGGGATAGGCGGCGGCAGCGGCGGCTGCGATCTGATGCAGCGGAATAACCGACCAC…
>Zm00001d014648
GGAAGCAGTCTGAACCACACGATCGTTCAGAGCAGAGAGAGGTTCTCGATCTCTCTCTCTCGGGGTATCAAATATATACATGATCTTGCGTTGATCGGTGGCCACGGCCATGGGCGCCTGAGCCGTTGATGAGAGCAGCAGTACCGTTGGTCGCAGCGGCGACGGCGGGCGGCCGGCGGACGCGATGTCCGTTGTGGCGGCCGTGGGGCCCGCGGCGGCGGCGTCTTACGGGCAGCCGCTGTGCGGCGGCGGGGCGAGGAAGAGGAAGGACGCGGGCGTGGTCCAGGACCAGGACCAGGACCAGGATGCAGGGTCGTCGTTGCGGGGTGGTAAGAACGCCGCGCTGTTCGTGCTGGAAACGGTGGAGGAAGAGGCGGACGCGGACACTGAGAGGTCGTC…
>Zm00001d014649
AGGTGTTACAAACCTGCGTGCAAATCTTGTTCAAAAATATAGGACAAATTGACATTTTTTTAGAAAACTCGAGCAGATATGGCAGATGCCCTCTTGGTCGTTCTCAGAAAAGTTGCTCTGTTCCTGGGAGAAGGAGCACTAGAAAAGATTGGCAAAGAGGTAGTCGAAGCAGCACCCCTCATGACAGATTTTGAGCATAGCATGAAACAAATAGAGGGTGAACTCTCGGTTCTGCAGGCCTTTATTAACCAAGTTAGTGCACAGAGAGTCAGTGACAAGGCATTTGATGCATGGTTGAACCAAGTCAGAGATGCTGCCCATGAGGTAGAAGACATCATTGATGAGTACGCTTACCTTACTGCACAAGCCGTTGATACGAGCAGCTTCTTCAAGAGAAAG…
>Zm00001d014657
ATGGACTTCACCAGGGAAGTCGTTGTCCCGGCGGCGCTGTCCGAGATCCTCGGCCGGATCTTCGCCTTCCTCTTCGACAGCTTGCCCCGGCCCTCGCGGGGCGCCCGGGAGCTGCACCGGCGGCGGCTGGAGCGGCTGCTGGGCAATATCGCCAGCATGGTCGAGGAGGCCGAGGGCCGCCACATCACCAACCAGCAGCTGCTCTCCCACCTCAAGGCGCTCACCGCGGGGATGTACCGCGGCCGCTTCACGCTCGAGGTGACGGACCTCGACGACGTCGTCAGCAGGAACGGCGACGGCGACGACGAGGACGCGGGTGACGGCGACGCCACGACTGCCGCCGCCAGTAGTGCAGGCAAGAGGTCGTTCGCGCTCTGCCGGTCGTTCAGCAGGGCGAAG…
>Zm00001d014674
GGAAGGACGACGACGCAACTGGCAGTCACCGACGCGACGCGGGTCGTCTCCTCAGCCCTCCTGTTCAGCCTCCTCGCCAGCGATGGCTTCGGGCGCCGACGCCGCGGCGCTGGTGACCTCCGGCGCCGACGAGTGGGCAGCGGCGTGTCCGCCGCTGCGGCGGAACCTGCAGCTGCTCGCGCCTGACGAGGTTGAGCTAGCAAAAATGCTGTTGAATGAGGGCCAGATTCACCTATTTGAACACTGGCCTGAACCAGGCATTGATGACGACAAGAAAAGAGGCTTCTTTGATCAGGTTCGCCGGCTTAATTCAAGCTATCCTGGAGGTCTGGTATCTTACATCAAGAATGCCAAAAAACTTCTTGCAGATTCAAAGGCAGGAAAAAACCCATATGATGG…
>Zm00001d014681
ATGAAGAAGAACAAATCAGGGGCATCCAACTACCTGTGCCTTGCACCCATCTTCAACTCCTGCGTTTCCTCCGGCAAGCAGCAGCCGTCCAACGCCGACGCTGCCGCCAGGAACCGCCTGAGCTTCTCCTTCCCGGAACGGCAGCAGCAGCCGGCGCCGGCGGAGGAGGAGCAGAACTCGGAGAGCATCATCGACCCGGCCGCCTCGGTCATCGCCAGGAAGGAGAAGGAGAAGGACGGCGGCAAGCACTGCGCCGTCATCGTGGGCACCATCTTCGGGCGGCGCGCCGGGCGCGTCACCTTCTGCGTGCAGCGCGACGCGGCGGTGCCGCCGCCGTTCCTCTTCGAGCTGTCCGTGCCCACGCAGTCCCTGGCCACCGAGATGGGCTCCGGCCTCCTC…
>Zm00001d014704
CGGTGCGCGCGCTCTTGTCTTGTTCCTGTGCCTGCCACTGCCAGTGCCACCATCTCGCCGTCGGCGTCGGCTCGTCGCCTGAGAGCCGAGGCCACGCAGGCACCCGGGCCGGGGGATGTCGGCGCCGGCGGCACAGGCCGTGGTGGCGCTGGCTCTCGCGGCCATCCTCTCGACCCCGGCGCCCCAGGCGGACACCTTCTCCAACGTCCCGCCCACGCTCTCCGGGGGCGACGGGAAGCAAGAGCGGATCAAGCACCCCAGGTCGGCCAAGGCGTTGCAGTGCACGACCAAGTGCGTCGGCACCTGCATCCGCGGCGGCGGCGGCGCGCCCGGCGAGGGGCCCCTCAACGTCAGGAGGCCCCTCGTGGTGTTCAAGGACGGCTTCCGCAGCCGGCAGTA…
>Zm00001d014744
AAGACGGTTCGAGTCCGTTCTAGAATCTAGACACGGCAATGAAGCCCAGGCCTCTCGGTTGCGGTTGCGGTTGCGTCCCGGCGGCGGTAGGGTGCGTCGGCTGGGCATGGAGGCCGACTCCGAGGCCGCGCGGGGGAGGGAGGGCAGCAGGGGTGTCGCCCAAGTGCTCGCACTCGGCGGCGGCGGCGGGAGCGGTACAGTCGGAGGACCGCCGCCGCGAGGTGCTGTACCGCCCGGTGGAGCTGCCCGGGACGGGGTACGGGTCTGAGCTGGAGGCGCGGATCGAGAAGGTCATCTACGCCTGCCGCTTCATGACCTTCTTCGGCATTTGTGGCTTGCTCCTCGGCTCTGTCCCATGCTTCCTCAAGGGATGCGTTTTCGTGATGGATGCCTTCGTCG…
>Zm00001d014772
GACTACTACTGCAGCGAGAGGAAAGAGAAAAAGGAAAGGAAAGGACAAAGGAGCGGCGGCGAGGTCTATGGCGTCGACGGCGGGGTACCTGGCGCGGCGGGCGGCGCAGAAGGAGCGGGTGCGCCTGCTCTACCGCAGGGCGCTCAAGGACACGCTCAACTGGGCCGTCCACCGCCACCTCTTCTACCAGGACGCGTCGGATCTCCGGGACAAGTTCGAGGCCAACCGACACGTGGATAACCTGGACGTGGTCGATAGGCTCATTGACGATGCGGAGGCTCAGTACAGGAACTTCCAGCACCCCGATCCCTACATTGTTCCATGGGCACCAGGCGGCACTAAATTCACAAGAAACCCCCCTCCACCTCAAGGGATCGAGATCATCTACAATTATGGCAA…
>Zm00001d014840
ATGGCGATGATGATGAGAGCATTGGCAGCAGCGGCCATCCTGGCCACGGCGTTTGCCGTGTCGGCACGAGCCGAGCCCCCGCAGTGCGGCGCCAACTCCACCACGGCGCTCTGCCCCTACTGCCTGTGCTGCAGCAAATGGGGCTTCTGCGGCAGCACCGAAGCCTACTGCGGCAACGGCTGCCAGAGCCAGTGCGACCGCTGCAACGCCACCGTCGCGTCCATCGTCACGCGGGAGCTCTTCGACGAGCTGCTGCTGCACCGCAACGACCTCAGGTGCCCCGCCCAGGGCTTCTACACCTACGACTCGTTCATCGCCGCGGCGGGCGCCGACGCGTCCGACGGCTTCGGCACCACGGGCGCCGTCGACATCCGGAAGCGCGAGGTCGCCGCGTTCCTG…
>Zm00001d014842
ATGATGAGAGCACTGGCACTTGCGTCCGTGTTGGCCGCGGCGCTCGCCGTGTCCGCTCGAGCTGCGCAGTGCGGCGATGGCGCCGACGGGAAGCTCTGCCCGGACTGCCTCTGCTGCAGCAAGTGGGGCTACTGTGGCTCCACCTCCGACTACTGCGGAGACGGTTGCCAGAGTCAGTGCGACGGCTGCGGCGGGGGCGGCACCCCTCCCCCTCCTCCTCCTTCTCCTTCTCCCCCTCCTCCCCCTCCCACCCCCACCCCCACCCCTGGCCCCCCGAGCGGCGGTGGCGTGGCGTCCATTATCACAGAAGATCTCTTCGAGAGGATGCTGAAGCACCGCAACGAACCTGACTGCAAAGCTCGGGGCTTCTACACCACGGAGGTCCAGAAGCGCGAGCTC…
>Zm00001d014868
ATGGGACGCCACCCGGCGCTTGGAGCCGGGCGTGACCGCGCGCTGCCAGAGAGGACTAAGTACAACAACATGGAGCCGGATGCTGTTGATTTCTTTGGGGAATGTATGAATAGTCCCCGAAATGGTCGTACTCCGCTTGCAAATGAGATATATGAGCAAATGGTTGCAGAGAAGGAAAGAGAGCTAGAAGAAGGAGAAGCACAAAAGTCACCCTCCAAGCTCAACAGGCCACACTTGAAGAAAACCAAAGTTTGCTGCGCCAGACCCAAGAGGAAGTGAAGGGGTTGCATACCAAGTTTGAAGAGACCAATGCACTGCTACGAGCTGTCCTGAAACTTCAGAAAGATTGAGGTAGGGATGCATACCAAGTCTGAGGATGATGCCTTTGCTTAAGGTTTT…
>Zm00001d014873
ATGGCGTTTGGGCCAAAGTTCCTTATCCCCTTCACGCCGGCCGTCCTTGTTCAGCCATGGTCACATGGTGGTGGAACACCTAGTTGTCTCGCAGTTTCCGAGAGCCCACTGTTTCGCGCTGCAGATGTGCTCCAGTGGAGCTTACCGCTACCACTTTGTGTTGGACACTTGAACTGCAATGCACAGTCACGGGCACAGATAGTCTCATCTCATAGTCAGATCCAGCCTCTCCGAATCTGGCCAGGGAACAACACGCCGTGCACGCACGCCCCGCATGAGGGGAAAGAACCGATTCAGATCGGTCCTGACCAGATTGAAGCTTTGTATCAGTATGCCAAATTTCAGTTTGAGTGTGGTAACTACTTAGGGGCTGCTGATTACCTTTACCAGTATGGTGCT…
>Zm00001d014885
GCCCAGGACCAGGAGCAAGATCCATCCATCCATCCCCGATTCCCCAACCCTAAGCAGCCATGGCCGCGCCGCCGCCCACGGGCTGCTTCAAGTGTGGCCGCCCCGGCCACTGGTCCCGCGACTGCCCCTCCTCCGCCTCCACCAACCCTCCTGCCGCCGCCGACGCGCCCACCAACCCTAGCCACCTCTCCGGCGCCGCCTCCCGCTTCAACGCCAAGCCCAGGCCCCCCGCGGCGGCGGTGGATGGCGAGGACGGCAAGGGGAAGAAGAAGAAGGAGAGGGCCACGCGCCCCAAGCTCACGCCGGACCTGCTCCTCTCCGACGGCGGCATCGGCTTCGTGCTCCGCTACTTCCCCAAGGCGTTCAAGCCCCGCGCCCGCCCAGGCCACGAGGTGGACG…
>Zm00001d014919
GAGAGAGAGAGAGAGAGAGAGAGAGAGAGAGAGAGAGAGAGAGAGAGAGAGAGAGAGAGAGAGAGAGAGAGAGAGAGAGAGAGAGAGAGAGAGAGAGAGAGAGAACCTCTCTGCAGGTGCAGCCATGGCGAAGCCCGTCTCCATCCAGGTGTGGAACCCCAGCGGCAAGTACCGCGTGGTGAGCACCAAGTCCATGCCGGGCACACGATGGATCCGCCTGCTCACCGACAACGACTGCCGCCTTGAGATATGCACCGAGCACAAGACCATCCTCTCCGTGGACGACATCCTGGCGCTCATCGGCGATCGCTGCGACGGCGTCATTGGACAGCTCACCGAGGACTGGGGGGACGTGCTCTTCTCTGCGCTCAAGCGCGCCGGAGGCACGGTCTTCAGCAA…
>Zm00001d014945
CATCGACGAACCAACTCCGACTCCAACTAGCCGGCAAGCCAAGCCAAAGCAAAGCAAAGCAGTGAGATAGATATATGATGAAGAAGGCCTCATCACTCTCCGAGCTGGGCTTCGACGCCAACGGCGCCTCCTCTGGCTTCTTCCGCCCAGTGACCGACGGCGGCGTCACGCCGACGTCGCCGCACCACCGCCGCAGGCTCACCAAGGTGTCGGTGATCGGCGCGGGCAACGTGGGGATGGCCATCGCGCAGACCATCCTCACGCGCGACCTCGCCGACGAGATCGCGCTGGTGGACGCGCTCCCGGACAAGCTCCGCGGGGAGATGCTGGACCTGCAGCACGCGGCGGCGTTCCTGCCGCGCACGCGCCTCGTGTCCGGCACCGACATGTCCGTCACCA…
>Zm00001d014958
ATGGAGACGCGTCTCTTCCTCCTCTGTGCTACTACTGTCGCCATCGCTCTCGTCTCCGTTTTGCTGGTCCTCGTCGCCCGCGGCCGCAAGCCCAGCGCCGGTCGCCTCCCGCCGGGTCCGCCGGCGCTGCTCTTCCTCGCCAAGTTCCTTGCGCTGCGGCGCTCCATCTTCGACCTGGCTCCGCTGCTCCGCGACCTGCACGCGCGCTACGGCCCCGTCATCTCGGTCCGCCTCGCCCGCACGCTCGTCTTCGTCGCCGACCGCCGCCTCGCGCACCGCCTCCTCGTCCAGGGCGGCGCCACCTTCGCGGACCGCCCGCCACCCGTTGACCCAAACAGCCTCTTCAGCGCCGGCGGCCAGGCGCTGCAGCCCGCCCGCGTCGCCCTCTTCGCGCCCGCC…
>Zm00001d014965
TCTTCTCCGTTTTCCTGCCCGCATACAAATGCCTGCGCATTAGCGATCCTCCTCGCTCTCCTTCCCCTTCCGCTGAGCCGTGCTGCCGCGGCCCCGGCACGCCATGGCGTCCACGGCGTACTCGCGGTCGTCGTCCAACAAGCTGCCGGGCGGCGAGCGGCGGCTGCCCCCGCGCCTCATGCGGGGCCTCACGTCCAAATTCGAGCCCAAGAAGCTGGGCGTCGGCCTCGTCGCCGGCTGCTGCCTGGCGCTCCTCACCTACGTCTCCCTCGCCAAGCTCTTCGCGGTCTACTCCCCTGTATTCGCCAGCACGGCCAACACGTCCGCGCTGATGCAGCAGAACGCGCCGCTGGCCTCGTCCAAGCCGTCCGTGCCGGAGACGGAGACCATCCCTCCGGA…
>Zm00001d015008
TCTGCTCTGGCTTATAATAACCGGCACCTTCTCCTTCCTCCGATCTCCTCGCCTCCCTCCTCTCTCCCAGATCCGTCTCCCGGCGTCAGACGCGCATCTCCAGCAATGGCGGACGAGAAGCTTGCCAAGCTGCGCGAAGCCACCGCCGGCCTCACGCAGATCAGCGAGAACGAGAAGTCCGGCTTCCTCAGCCTCGTCGGCCGCTACCTCAGCGGCGACGAGGAGCACATCGAGTGGGCCAAGATCCACACGCCCACCGACGAGGTGGTGGTGCCGTACGACACCCTGGAGTCCCCGCCAGAAGGCACTGAGGCGACCAAGAAGCTGCTCGACAAGCTCGCCGTGCTCAAGCTCAACGGCGGCCTGGGGACCACCATGGGATGCACCGGACCCAAATCG…
>Zm00001d015028
TGTTAGTGTCCCTGGCACTATATCATTCATTTGGAGATTTTCAATCAGCTGTATAGCTATGTAAAATTGGTTGCATTTTAGGTGATTTGTGGGAATTAAATTGCAATGTACCAGAAATCGATCTTAATTTATGCAATAGATTATATGGGAAAAATCATACCATGGATTGGATGTAGGCTGAAACCAGTTACTTCATCTAGGCTAAAATTGTTGGTTCTGTACAAAAGGTAGTCTAATTAGGCTTTGATATCCGAATTAAATGTTTATCACCTACTTTTAGAAAAAAGTTAGTCATCTTCACGATCCAGTTGATACATATTCACAAATTTGTACATGAGTAACAGGCAACAACTTTTCTCAATTTATCCAGAAAATGACTTATTTTTAGGGGCCTGGTGT…
>Zm00001d015030
CGGTCTCACCTCATCCACATCTACCAGGCATCAGCTCGAAAGCTCAGCACATCACAGGCCAGCCCAAGCAGCGATGCCAGCGGTGGCGTCCCTTTGGGCGCCGCCCGCGGCTGCCCGGCGGCGGAGGTTCTCCCCCGTGGTCTCGTCCTCGCTGCGCCGGGTCGCGTCGGGCGGCGGGTCTAGCTGGCGGAGCGAGCGGCGGCTCATGTCGGAGCTGGAGCGCACAGTGACAGCGGGCGCGACCGAGCGCGTCATCCGCAGCTACGTCGGCACCAAGTCGGAGCGCGCCGCGCTCGCCGCGCTCTCCAGGCTACTCATGGACTCCGACCCCCTCGCCATCCCGTTCTACGAGGCGGTCACACAGGCACGGTGGTTCAAATGGAGCTCGATCCACGCAGC…
>Zm00001d015031
ATGCTGGGCACGCTGCCGCCGTCGTACCTCCGGTGGGTCGCGGCCGAGCTCGACTACGGGGACACCGCGCCCTGGGCAGGCCTCGCGCGCGCCGTCCTCGACGACCCCGTGTACGTCGACCGCGTCGAGTGGGAGCACGCGCACCGCTTCCTCCGCGGCGACGCCGACGGCTACGACTACGCCTACGACGCCGACGGCGACGGGCCGCTCCAGGAGATGGCCGAGCGCTTCGGGTGGGACCTCTCCGACGAGGAAGGGTGGGGCCGCCTCGACCTCCGCCTCCTCGGCACATCCTACGGCGGCCGCATTCCAAGGAAGGGCGCCCGGACGAAGCAAAGCAACAGCAATAGCAACAGCTCCCCCGGCGGCGCCAAGAAGGGCGGCTCCCTGTTCGGCGCC…
>Zm00001d015032
ACGTGCGCGCCACCACCTCCCATGCAAGGGCAGTCGTAGCAGCACGGCCGTCTCGTGCCCGTGCCCGTGCCCGCCGCGCCGCTTTTCGATCGACGCGATACGCCCACCCGCAGCGCCGTTCTCTTTGGCAGATCCATGGCCGTGGATAGTCCCCCGCCGGCGTCACCGCAGCGACGGCAGTCCGAGGCCGGCGCGGGCGGGCGGCGGACGGACAGGCACGGCCGACGCCTCGAGGTGTACAACGAGGTGCTCGTCCGCCTGCGCTCCTCCGCCGCGGTCTCTCCGGCCTTCGAGGACGCGCTCTGGGCCCACTTCCACCGCCTCCCCGCCCGGTACGCGCTGGATGTGAACGCGGAGAGGGCGGACGATGTGGTCACCCACCAGCGGCTGCTCCAGGAG…
>Zm00001d015037
CGCGAATGTACACCTTTAACCATATCCTACCTTCTGCCATGTGAGCCCTTTGTGTCAGTAGCTTGGCTATCCCGCTCGCCGTCTCGTTTGGGCCCCCAACACCCCCCACCCCACCGTCTGACCGTCCTATAGACTATAGTCCTATGATCCTATCCATCATCCTCTCCCATTTCGTCGCAATCCTCAAAAAGGGAAGACATGGCGGCGAGCGCACTGCTGACGGGGTCGCCGTGGCTGCGCATGCGCCTCCTACCGGACGCGCCCGCGCGCCCCTTCCGCCACCTCCACCTCCGCCGGAGCTTCTCCGTCCGCGCCTCCGGCGCCGACGGCAGCCCCGCCCCCGTCCGCGTCCGCTTCGCGCCGTCGCCCACCGGCAACCTCCACGTCGGCGGCGCCCGC…
>Zm00001d015050
ATGCAGCACCATGGGCCGCCCCCGATGGCGCGCCTCCGCCCCGAACCAATCGACCGCGAGAAGACCTGTCCTCTGCTGCTCAGGGTTTTCACGAGGGTTGCTGGTCACCACCAAAATGAAGAGTTTGCTGTGAGAGGGAAGGAGCCAAAGGATGAAGTTCAGATTTACGCATGGAAGGATGCGACTCTCCGCGAGCTCACTGATCTTATAAGAATCCTGGGGATGAGGAAGCTAAAGAGAAGTTTCAGCTGCTGCAGAAGGTTATATCCATTCTTGGAGATGCAGAGAAAAGAGCGTTTATATGATGATACTGGCATCACTGATGATGCACTGGTGGGAGAAGCTGCAGACAATCTTCAGGAGTACTTCAGAACAATGTACAAGAAAGTCACAGAGGCT…
>Zm00001d015095
CACGCTATCGGCTATCCTCTCCCCTCTATCCTTTTCTTCACTCCCCCCACACACTGTCACTGCCAGCCTCCCCTTCGCTTCGCTTAGCTCGCCGTCACCATGGCGACCTCCACCTTCTCTCCGCGCCCCGCCACCCTCAAGCCCCTGCGGGCACGCGCCAAGCCCGCCGGCCTCCAGCTCCACCTCCTCCCCTTCCCGCGCCTCCGCGTCGCCTGCGCCACCGCCGCCGGGGAGGCGCCGCCCGTTGAGCAGCGGGACGAGGTGGAGCCGGCCTCTGCCGCGGCATCCAACGGGACTGCCGTTAAGGTCGAGGCGTCCGCCGCGAAGCCCGAGTCCCCGCCCGCGCCCGCGCCGGTCCCGGCCTTCCGCGACGCCAGGTGGGTCAACGGCACCTGGGAC…
>Zm00001d015101
ATGCCGGCACCGCGGTTGGCGTTAAACCCGGCCGCCGTGCTCCACGCGGCGCTCCTCAGGGCCTCCTCTGCCGGTTGCCGCCTGCCTCCCCGCATCTCCTTCAACTCGCTGCTGGCGGCCGCCGCGTCCTCCGCGGACACGCGCACCCGCGCTCTCGCGCTCCCGGCTCTCGCGCTCGCCCACGCCTCCGGCCGCGTGTCCCTCGACTCGTACGCCCTCTGCTCCGCGCTCCGCTCCGCGCCCTCCGCCGCGGGGACGCTGCACGCGCTGGCCGCCAAGTCCGGCTGGCTCGGCAGCGTCTTCGTGTCCTGCGCGCTCGCCGCTTCCTACGGCGGGTCCGGCCGGTGCCTGGACGCCCGGAGCCTGTTCGACGAAAGTCCCGCCAGGAACGGCGTCTTC…
>Zm00001d015129
CACCTCCCGCTGTCGCACGCTCGTTTTTTTTATCATTCACTTGCACTTCAAGTCCTCCTCCTCCCCTGGCTTCTTCTTCTTCCTCCTCCTGCTGGCTGCTGCTGCTCTTCTTTCTTCCTCCTACTCGATCCGTCTCCACCACCTCACACGTACGGTACTCATCATCTCCCATCCGAAACCCGCTCTCCCCTGCCAGAGCTAGCTAGATCTATATAGCCTGCAGTCCTGGAGCTTGCGAGCAAAGGCATACGTACATACATACATACGCGTTCGCCGTGTCGGGCCGTACGTACGTTGTCGTGCGATGGGTGCGGCGCCGGCGGCGAGGAGGTGCGCGCTGCTCTTGGCGCTGGTGGTGCTGGTCGCGGCCGCGGGCGAGCGCGGTGGCAGTGGTGCCGG…
>Zm00001d015204
ATCCGCATAAATCCCAGTCAAATTGAACGAGAGCGCCACTCCCCTCTGCTAATCCCAGTCAAATCGAAGCAAGCATGGCCATGGCGGCCGTGGGCGTGGGCGGCGCAGTGGCGTTCCTCCTCCCGCAGCGCCGCCAGGGCGCCGTCCCCTGGAGCGGCGGGCGGCGGCGGGCGCCCGTGGCGGTGCGCGCGTCGTACGAGGCCGGGGTGGGCGTGATGGCGACCAAGGTGGGGATGATGACCTACTTCGATCCGGAGACGGGGAAGCCGGTGCCGGTGACCGTGGTCGGGTTCCGGGAGGGCGGCAACGTGGTGACGCAGGTGAAGACGGCCGCCACGGACGGGTACGACGCCGTCCAGGTCGGGTACCACGGCGTGCGCGAGGACAAGCTCACCCGCC…
>Zm00001d015212
AGTCTCTTTCATGGTATCGAGCTAGGTTCTCATCTCCTCTCCCCCACCCTCCCACCCTCAGCCGCTGGTTGGCTCTCCCACAGTCGTCGGCTTGTCGACATTGCCCCTACCCCCACCTCCCCTCGCCCTGCGTCCCGCCAGGCCCCCTGCTCCCCATGCCCGGTGCGCGCGACGGCCACCATGGCAGACAGCTCTTGGGCGACTGTGGCCGCCAGTGTCCACCCCGCCACCAGCGTCGCCACCTCACCTGTCTCCACCACCGAAGCGCACGCCACCAGTGTCGCGACCACTCCTTGCGCGTACGACGCCTTCTCAGTTGGCACGACCTCTTCTCGCGTGTGCGGCGCCTGGGGCTCGCCCGGCTTCGGCCACCTGGTGCTGGCCGCCGCCGCTACCCAA…
>Zm00001d015221
ACACCACTGTCCACTGCTTTAGTTTTTTCTCCCCGCTGCACGTTAACATTCTCTCTCTTGTACCCTCGAAAGCTCGAAAGATCCCGCGGCGCAGCAGCCACCCTTCTCTCCTCTCCGCTCCCAATCTTTGTCGTCGCCTCCCTCGAAGTCGCCGCTACCTTCATTCCACCATGGCGCTTCACGCCCCGGTCCTCGTGATGAAGGACTCGCTGAAGCGGGAGTCTGGCGCGAAGGTTCACAAAGCCAACATCCAGGCGGCCAAGGCTGTTGCTGACATCATTCGCACTACATTGGGTCCCAGATCCATGCTGAAAATGCTTCTGGACGCTGGACGCTGTGGTCGTCAAATTTTCTCCAGTACTGCCTTGAGTAGCTGCAGTGGTGACCACACAAGTGAAC…
>Zm00001d015226
GGAATAGGAGCGGGGGAGTCCGAGGATAGGCAACTCATTGCTTCTGAATCTCTCTCCTCGTCGCGACGAGATCCTCTGCATCTCTACTTCCCCGGGGAAGTAGCTGCTAGCGTGTGGGTCTGACCTCTCCTCATCCCGAGTTCTTCATTTTCAGAGTTAGCTGCAGTCCCAGACTCTCGTTCTCGTTCCTGGTCTTCTTCTTCCTCCACCATTTGTGCTTGTGCTGTTTCAGTGGTCTGCTTGGGAACCGAACCACCATGAACCTTGCGTGGGCTCTGCATTCCTTTCCTTCCGATTCCTGCTGCCTCTGTGTCTCCTCCAATCCATGTGACGTGAAGCAGCTATGATATATATATATTTTTTCCAGAGTCTTGACTCTTCAGGCCCAGAGGCTCCGCA…
>Zm00001d015242
ACGGCAGCCTGTCGCTGTCACCGTCGTCATCTTCCTCCTGTGATCGCCCCGCTCCGCTTCTGCAGGCCACGGCTGGGCGACACCCTGATGGCGTCGCCTCCTCCCGTGGCGACCGCGGGGCCTCACAGCGTCTTCGTGTACGGCACGCTGATGGAAGAGGAGGTGGTGCGTGTGCTCCTGGGCCGCGCCCCGCCCTCCTCCTCCCCCGCGCTCCTCCCCGACCACCGCAGGTTCAGCCTCAGGGGCCGCGTCTACCCGGCCATCCTCCCCGCCCGCGCCCACGCGGTGAGCGGAAAGGTTATCCAGGGGCTCACCGACAGGGAACTCCATGTGTTCGACATGTTCGAGGACGAGGAGTATGTGAAGACAACCGTCGAGGTCTCACTGACTGATGCATCG…
>Zm00001d015256
CACCGTTAAGGCAGGTGATGCGGCCGACAAGGGGGCGGCGTCCAGGAACCCACAAAATCACGTCGTGGTGGGGAGGCACGGGATTCGGATCCGGCCGTGGCCACACCCGGACCCCATCGAGGTGATGCGGGCGCAACGGATCATGGAGCGTGTGCAGGAGGAACAGCGCCGCTGGTACGGCGTCAAGGAGCCGGGGCAGGTGCTCGCCGTCACCCCGACCTACTCACGCGCGTTCCAGGCGCTCCACCTCACCGGCCTCCTCCACTCACTCCGTCGGAATCCTTGCGCATACTGGCAAGGCAGACCAACTGCTGCTCAGCGAGGAGGACAAGCAGAATATGCCTCTTCCAGTCCATGGCCCTGCTTGCAAGTCCTCAGGGCATCTGATTGGATGGCACA…
>Zm00001d015270
ATGACCATGACAAATAGAAAATCGACGACCGGCGAAACCGATAGCCGAACAGGAATTGAGCTAACAGGAATTGCACAGATCGACGACGCGAGGCCCGATCTGGTGAGCACGACGCAAAGGTGGGCGTCGCTGCCGCTGCTCCGACACGAAGTACTTGCTGCCGAGGCAGACGAGCACAACGGAGGCCGGGGTCTGGGCATCGAGCCAGCGCATCACGCAGTTTGGAAACCACACCACCCACACGAAGCGCTTGCCGCAGAGCACCAGACCGCGCGCCATTCGCGCAGAGCTCCAAAATCGCGCGCCGAACTGGGAGCCAAGGCGAGCGCGGCAAGTGAGCTGAGGGGGCACGTCAGGAAACTCAATGGCGGCGATCTGGGCGAACGCGACACAGGAGAC…
>Zm00001d015283
ATGGATTTAAGGATATCTGAGGGTTCTGGTACTAGTACCACCTTGGATGACCAATCGGTACAATCGCCGACCAGAAGGGCAAAGGTTTGGGAGTATTTTGAGCAAGAGTTAGTTGAGGTTGATAGAGTGATGAAGGCTGTTTGCAAATACTGTGGGACGAAGCTAACAAGTAAAAGGAATTCAGGAACAAATAGCCTTAGAAACCTTGTTGCGGATACATGTCCTAAAATTCCAGTTGAGGACCAAAAACGATTCATTGCAACAATGAGAAAAAGGCCAGGAGAAGGTTCATTTGTGTTTGACCCTCGAAAGACTCGTGAGTGCATGGTTAAGTGGTGCATCAGTGCTGAGGTCGCATTCAACAAGTTTGATGATCCTTTCTTTGCCCCGTGGATGGAG…
>Zm00001d015320
CGACCTCTGCATCCTCTGTCTTCTCCTCAGCACACCGGATGCTGTCGCAGTCCACGACGCTGTCCGCGCCCCCTAGCCCCCAGGGCCTGCTGTCCCTGTCGGCATCCTCGTTCGCTCCGCCCGCATGGGTAGACGACCTCCTTGCACTCACGCTCGCCGAGGGGCAGGGGCACTCGCCGGCTCCGGCGAGGGCTATGCCATCGCCGCCCACCTCGACACTGCGCGTCGCGCTCCTCGACACCTGCAACGCCATCGCCGCGCGCCTCCACCGCCTTCACAGGCGCAACCTCCTCGCGCGACCATCTCATTCGCCGGCAAGGTCATCGCGCTGGAAAAGGAGATATTCAGTTATAGTCCAGTTGCCTACACATAAAGACTTTGAACAAACCAGGTTGAGTA…
>Zm00001d015344
GAAACAAAGCACACGCACACCAAACTACCAAACCAACAGAGCAACATCAATGCGCCTTCCGCCGCCATCAACCACCGCGGCCGCAGCCGCTGCCACCGTCGGGGCCGTACTCGCCGCAGTCGCCCTCCGCCGCTACCTGTCCGCTTCTCGCCACCGCGAACCCGCCCGCGTGCCCATGTCCGCGGCCGCCGGAGCCACCACGCTTGTGGTGTACGGCAAATCGGCGCAGGAGCAGGAGCTGCTGGCCTCCGCGGCCGGTTCCGTCGTCCTCGGTGAGGGCGATCCGTCCGGTGATGTCGCCATCGCGCTCGCCTACGAGAGCGCGGGCTTCGACGCCGCCGCGTACATGAGCGCGCTCCGGGCGCGCCGGTTCGGGAGGTGGATGCTCTGGACGCCCAG…
>Zm00001d015372
ATGGAGCCGGCGACCCCTCCGGCACCCGCCGCCGGCGTCACTGCTACCATCGACCTCTCCCTAGTCGCAGCCGACCTCGGTGGGGCGCACCTCCTGCCCTGCGGCATCAGGCAGAACGGCGGCGCCCCCGTATCCGACTACTTCAAGCCTAGGGCCACAGGTCCGGATGGCTACCGAGTGATACAACAACAACAACAACAACAGCAGTACCAGTCTTTTAGTCCCAATAGAAACTGTGAATTCGACAGAAGTTTTGTATTGGAGAAGAGGCACGGACATAATTCAAATGCTGAAGTCAACAATTTTACATCCCAAGCTGAATTCCAGAGCATAACCTACTGGAATCACGATACAACGTCATCAACAGAGGATTCCCTCCCGAGGTGCTTCCATTGGCTA…
>Zm00001d015404
CGGGAAACGTCAAAAAAGTCACTCGCGACTCGCGAGTTGGAACTCTGGCGTCCGCCATCGGCCCATCGCCACTCGTCGTCTTCCTCGCTCGCACACCCGTCCCATCCAGTTTTTAAATGGCGACGGCGATGATGACTATGCGACGCGCGGCGGCGCTCGGCGCCCGACACATCCCGCCCGCCGCCGCCTTCTCCCGCCACATGAGTGCGGACGCGAGCGCCGCGATGGAGAAGATCCGCGCCGCGGGTCTGCTCAAGACGCAGGGGCTCATCGCCGGACAGTGGGTCGACGCATACGATGGCAAGACCATCGAGGTGCAAAATCCAGCAACTGGTGAGGTCCTTGCAAACGTGTCCTTTATGGGCAGCAGAGAAACATCTGATGCTATTGCTTCTGCTC…
>Zm00001d015431
ATGGCGCTGCGTGCCCTGTACAACGAGATCCGGAGCATGAAGGTCCGCGACGTGCCGGCTTACCTGAAGCCGCGCTTGACCTGGGACAACGTCAAGAAGAGCGCCGACCAGGCCGTCGACCGCTACATCGAGAAGTACATCGACACGAGCTCGCCGGACCCTCTCTACCACGTCTGCATCGGAGGGATGATCTTCTCCTACTTCGTCAATCTGCCCTGGGAGCGCGCCCACCTCGCCCACCTCGAGGAGATGGAGAGGACCGGTGGGAAGCACTAG
>Zm00001d015444
CCCCTAACCCTAACCGGTCGCCACCTAAACCTAGGGCAGCCGCCGTTTGTTGTCGCGAGCGCGTTCCTGCCCCGCCACAGCCGAAGCTCCCAGCGTCCTCCTGCAGGCCGAGCTGAAGGTTCAGCGCGCCGGTGGAGTTCGACGACGAAACTCCGTCACGTCATACCTCTCCACCTCCCGTCTTCCAGACGTCTCCAATCGAGGCTCCCAGCGTCTCGGAGAAGAGGAGCAGCACGACACGGCGGCTGTGGCGAGGAAGGCTCCTGTCCCATCCCAACCCAGTTAGCAGCCGTCCAAGGAGGAGGAGATCCAATCGGCGTGCGGGCGTCCGCGGTCCATCCATCGATCCAATTCCAATCTGCAGGTGAGCAGCTCGTTGAGATTCCCAATCAACAGCTC…
>Zm00001d015445
GGCAGCCGCCGTTTGTTGTCGCGAGCGCGTTCCTGCCCCGCCACAGCCGAAGCTCCCAGCGTCCTCCTGCAGGCCGAGCTGAAGGTTCAGCGCGCCGGTGGAGTTCGACGATGAAACTCCGTCACGTCATACCTCTCCACCTCCCGTCTTCCAGACGTCTCCAATCGAGGCTCCCAGCGTCTCGGAGAAGAGGAGCAGCACGGCACGGCGGCTGTGGCGAGGAAGGCTCCTGTCCCATCCCAACCCAGTTAGCAGCCGTCCAAGGAGGAGGAGATCCAATCGGCGTGCGGGCGTCCGCGGTCCATCCATCGATCCAATTCCAATCTGCAGGTGAGCAGCTCGTTGAGATTCCCAATCAACAGCTCGAATCGCCTGCTCTCCCATCCTATTGAATGAAAC…
>Zm00001d015497
GCGGCAGCAGAACACCTTCCTGACCCGAATTCAATCCGTGCGCAGGCACCCTCCGCCGGCGATGGCTCACGCATCGCTCGGCGCCCGCCCCACGTCCCCGAGGCGACGACCGGCACAACGCGCCCTCGCGGCGCTACCCGACACCTGCGACGAAACGCGCCAAGTTCAGGAGCGCGTCGACACAGGGGCTCGGGAACACGGTGTCGCCATCGCGGAACCCTAGCGAGATCGTCGGGAAGGTCCGAAGGTGAGCACGTGTTTGTGTAACCTTTGGCTCCGGTTCGCAATGGTGGACGGCGATGGTGACAGGGAACACCAGCAATAGCCGGTTGTGGCAGCTGCCGCCGCGTCACATAGCGCCGAGTTGGAGGGGCACATCACGTGAATAGATCTGCGCAG…
>Zm00001d015519
GTCAGCTCTTGCGGGAAGCACTCAATTGTAATACTGTGAAGTCTGAACCGGCTGGCCTGGCCGTTGCTGAGGGAGAGGATAAAGAACACCGAAATGCCACTCCTGCTGCTCCCACCACCGGCGTGCACCACGGCAGCGACGTCGCTCGCTTTCTCGCGGCCCCGGCCTTCGCGGGCGCGTTGGGCCAACCTCTCTTACGCGTTCCCCCGCCTGAGGAAATACGGGCGTCGCCACCGCGAGCCCGTGGCCGGCCCCAGCCTCGATGATGACGGCGGCGAGGAGGATGAGACGGAGGCAGAGGACTGGGAGTCCGACGATGGCGATGAAGAGATGGAGATAGACGAGGAGGAGTTTCTGACGATGCGGCCCAAACCGGCGGGATTTGGCGAGGGGAAAACA…
>Zm00001d015591
TCAATAGGATCAAATGAGTTCTGAGTCATCTTCTGATACATCTGGGTCATCAACTTCAAAAACCTCTGGGTCCACAAGTACCTCATCTTCCACTAGCTTGCATTCAGAGGACATTGTCGAAAAAGGTTCTTGTACTTCTGCCAGGCATAGAACGAAACGAGGTCACGCCAAATGCAAGAAGCTAGAAAAAGGAGGTCCCCGTCGTCTTACGTTTGATAAAAATGGGATTGCCCAGTCACCTATAAAACATGTCAATGAATTCTCAAGCTATTGTGGTTATATAGCACGCATGCGTGTTGATATTAGGATAAAGGATTGGCGAAAAGTGCCTACAGTGGTAAAATCAAACCTATGGGAGGATGTTTCAAAGAAATTTGTCATGCCAAGGGATGAAACCCA…
>Zm00001d015623
ATGGGAGAGGAAGAGGGCGCGCCCACCGTGGCAGCAGCGGCAGAGAGCGCTCCGCCGCACCTGCTCCTGATATGCTTCCCGGGGCAGGGCCACGTGAACCCGATGCTCCGCCTGGCCAAGCGCATCGCGGCCAAGGGCCTCCTGGTGACCTTCTCCTCGATCTCCAGAGTCGGGGCGATGCTCGCCGCGTCCGTGGGCGTGTCGGCCGGCGGTGACGGCGTGCCTGTGGGCCGGGGCCGCGTCCGGTTCGAGTTCATGGACGATGAAGACCCCGGGCCTGACCTGGACGACCTCTTGCGGCACCTCGCGAAGGACGGCCCGCCGGCGTTTGCCGAGCTGCTGGAGCGGCAGGCGGACGCCGGGCGGCCTGTGGCGTGCGTGGTGGTAAACCCGTTCATG…
>Zm00001d015690
CATAACCCTAACCTAGCCGATTCAATCCCAGCAACAGCCGCCCTATCCTCCTCGTCAGCCGTCACCGCCGCCCCACAGCCTCGCCTCTACCATCGCCCCCGCCGGTGCTAGCTGCATCCGGCCAGGAGGTCAGTGCCCGGCACTAGCCGCATCTAGCCTGGTGATTAGTGCTCCACCTCGCTCCAGCCTCCAGCCCACGCCTATAGGGGCCCCTGCCTAGCAGCCAGCCACTGTCGGCTAGGTGGTCAATGCCCCCGCCCGCCGCCCATGCCACGCCGCCAGCCGGCCAGCTGGCTAGCCGGCCCGCCACTGCTCCACTGTGCTCCAGTAGATGCTCGATTGTTTGCCGGCGATGGTGCAGACCAACCTCTCCATCGACAAGATTAATGCCATGCTTAA…
>Zm00001d015724
AATTCCCCATCAATGGCCCGCACCATCTCTCCCAGTCTCCATACTCCCAACTCCACCGCTGGCAAAATCCCCCAATCTTCCGCACTCTGTAACCCCGCCCGCGATGGAGGCCGCAACCGCCGCCACGGCGGCGATGATGTGGTTCCGGAAGGGCCTGCGCGTGCACGACAACCCGGCGCTGGACGCGGCCCGCCGACACGGGGCCGGCGCTGCATCCGCGCGGCTGTACCCGGTGTTCGTGCTCGATCCGCGCTACCTTCGCCCGGATGCCGTCGCGGCGTCCCCAGGTTCCGCGCGCGCCGGGGTCGCCCGCATCCGCTTCCTCCTCGAGAGCCTCAGCGACCTCGACGCTCGTCTCCGCCGCCTAGGGTCCCGCCTCCTCCTCCTGCGCGCCCGCGA…
>Zm00001d015747
GCCGCTCGCTCGCCCTCATTGGGGCCCCAATCCCCTAGGCCTCCACTTCTCCGATTGGGGCGATTTCATGGCAAGCGGGCATAGATCCGACGGCCGCTCTGTCCTCTGCGCCTCCACTACCGCTCTCCTTGTTAGGCGCCGACGGCTAGGAGGAGGAGGAAGGGTCGGCCGGGCCACCGCTGGTGGCCATGGCATCCCAGTGTGCCCCGCCCTTGCCTCCTCGGCCACGCGCCACCGCGCCGTTCCTCCTCGGCCACGCACCGCCGCACGCCCGTCCTCCTCGGTGCGCCGCCCTCACCCCCTCGGTGCTCGCCGCCACGCGCCCGTGCTTCCTCGCCTCCACGCGCGTCCTGCTGAGACCACAGAGCGAAGAAGCCCCAGCCTCCTGTAGCTGGTCTC…
>Zm00001d015783
AAGGCATGCAGGCAAGTTCGGCAACGCAAGAGACCCGATACCATTCCCCCTCGGCGGCCACCATTCCATTCTTGGCAAGCTAGCCACCCCCACCCAGCCCGGCCGAGCAAGCAACCGGCCACCTCGCCGGCGAGCGTGCGTGCGGGGGAGAAGTACTAATTAACCGCGCGCGCGATCCATCCATGGCCGTGCCGCCGCCGTGCCCCGCGCCCCACGCAACGTGCCCCGCACGCCGCCCGCCTGCTCTAATGCCCGCGCGCCTCGCTGCGACCACGCCTTCCACTTCCACCGCTTGCGCCTCTCGCCACCGAGCTCCTCCTCGCTGCTGCTCCGCCAGTTGGACTGGGAGGCGACGGCGGTGATGGCGCCGCCGCGGTGGAAGTCCGGCGACGGGCGCCG…
>Zm00001d015830
ATGGTGGGCGCGCAGGAGCTTCCCTGGCTGGCCCTCACCTCCAGCCGTCAGGCTTCTCTCCCCAGCCTCTCTCTTCTTGAACGTAGGGAGCCTTCTTCTCCCAGGGAGCAGCCGCTCACCTCCACTGCTCCCTCCGGCGTCGGCCAGCGGGCAGGATTCCCTACCTTCCTCCCTCGCTCAGCCCTATTCTGGCCTGTCCTCCTCCTGATCTTCAGCCAGCAAGAAGCCAGCGGTCTCTCCAGGCTTGCCCATGGCGCTCGGCTGGCCATGGCATCCCCCTTGCAGCTTGCCTCCCTGCCGGATCTCTTCCTAGTGGCCGCGGCGAGCTCCCTTCCTCCAAGCACCCGGCCCGCAGGGACCTCCTCTGGTCCGAACTTGAGCAGGTGCTCTCCCCCACGC…
>Zm00001d015870
CTAGATTCGGATCCGCCATCAACAGGCTCCGCCATCAACAGGCTCGAACGCCCTCTCCTCAAACCCTACCAGATCTTGTCGTTCGGCGCCTCAAACCCCAGATTCGGATCCGCCATCACCATAGAGGTGGGGGCAGACGGCATAGCGCTCATCACCATCGCCAACCTGCCCGTGGTGGATGCGCCATCGCCTGAGGCGAGCCGCGGGGAAATGAGGGATCCTTGGAGGCAGAGCTGGCGTCGCGTCGCCGGTGGACGCTGGTGCTGGTGAACATGGCGTCGGTGCTGGAAAAGATAGACGAGATGTTGCTGCTCGCCGTGTACAAGAAGGTGTGCACGTCGCTGGGCGCTTCTCGACGGCGCTGGGCTCCCAAACCCTTTGTCGCGCGCTCGTTCAAGC…
>Zm00001d015917
CGTCGGGGCCTTTTGCTTCTTCTTTCTATAAATCAAACCAAAAGGCAACGACCCAAGTCCCAACGGAACTTAGCTGCCGAGCGCCCAAAGCCCCACCGCCGCTCCCATCAAGCGGCGCTAAAGGTTTCCTCGCCCGCAACGCGATGCCGAAGAACAAGGGAAAGGGAGGCAAGAACCGGAAGCGGGGCAAGAACGAGGCGGACGACGAGAAGCGGGAGCTGGTGTTCAAGGAGGACGGGCAGGAGTACGCGCAGGTGACGCGGATGCTGGGCAACGGCCGCTGCGAGGCGCTCTGCATCGACGGCACCAAGCGCCTCTGCCACATCCGGGGCAAGATGCACAAGAAGGTGTGGATCGCCGCCGGGGACATCGTGCTCGTCGGCCTGCGCGACTACCAGG…
>Zm00001d015918
ATGGCTATGCACCGCGCCGCCGCGCTCGCACTGCGCCGCCTCTCCGCCGCAGCGGCGGCAGTGGCTCCAAGCCCCGTCTCCCTTACCCATCTCCGGCCGGTGGTGGTGGCGGCGACCGCTACCAATGCCAGGTTTGTTATGCAGCCTACGACCGCGGCTGCTGCTTTGCGCCTCCGGCGCGGTTACGCGGCAGGCGGTGGTGCGGGCCGGAAGGCGGTGATCGAGGACGAGGATGATGACGAGGATGAGCTCGAGGCTATGGGCAGCGACGGCGAGTTCGACGGCGACTTCGACGACGACTTCGACGGCGACTTCGACGACGAGGATCTCGATGAATTCGAGGACGACTCTGATGATGGTTCTGAGCGCGAAGCCGGGCCCTAG
>Zm00001d015976
CAAATACATTGAGGATAGCACGAGAAAGGGGCGCCAAGCAAACCGGGTCGGCCAGCAGACACCGCCATGAGGACTCTACTACCTGTGGCCGCCGGTCGCGGGACCGTCGCCTGCGCGGCCACGCCCGTCCCCCGGAGGTCGCTGCTCCTCTCCACCGCTGCCGCAGGTGCGGCGCTGCAGCCGGAGCAGGTGGCTGGGACGAGGCCGTTGAGGCTGACCAGGAGCGTGGCGAGCGCCGTGGCAAAGCCCAGGACCTCGGCCGACGAGGCCATCTCGTGGGCGAAGAAGGACAACCGCCGGCTCCTCCACGTCGTCTACCGGGTCGGCGACCTCGACAAGACGATCAACTCGTCGGCCCGGCCCTGCTGGTCTGATGACCCAATAACGCAGTGCAGGTTC…
>Zm00001d016006
CTTCTCAGAATCCGATGGCCCACCTTCCCTCCTCTCCGGCGGCCGCTGTACCCACCGGCCACCGCGTCTCGCCCTCGCCTCATTCTTGCCGTTCCCTCCCGCAGCTGAAGACCGTACTGTTGTCGATAGGAGCCGCCGCGGGTCCCCCTAGGCGGTCATGGAGGGGAATGGAATCGGTGGCCGCGGCTCCCACGGGCTCGGATAACGCCGCAGCGACCGGAACAATTGCCCATGCAAATGAAGTTCCTGTCTTGTCTTTCTCTGAGGTTGCCGAAAGGCTCGATACATTCCATGCGTCTGGAGCTAGGAATCAAAATTACATGGCCATGTACTCTAGCATTTTTGGTGGAATTACAACAAACCCTTCTGCAATGGTGATACCAATCGATGATCACATGG…
>Zm00001d016060
GGTATCTTAACGATCGAGATTTTTCAATGTCTCTCGTCTGAAATGGACTGGACTGAAACAAAAAACATTCGGGGACGCGCCTGCTTGCTTCTTTCCCCAAACCCCAAACCGCAGGTAGGAAGCAAACCGCACGCCCCGCTCCAGAACGGATCCTCATCTCTCACGTTGTCACCACAGTCTGAATCCAGAATCCAACTAGTAGCTCCATAAAAGCGGCAATGATCCAGCTGCTGTTCGTCGTGCTGGTGGCGGAGGCGTCCCTGACGGCGGCGCTGCTCTTCAAGACGCCGCTGCGGAAGCTCGCCGTGCTAGTGATCGACCGGCTCAAGCGCGGCCGCCACGCGCCCGTCGTCGTCAAGACGGTCGCGGGCGTCATCCTTGCCCTGCTCGCTTCAACGC…
>Zm00001d016080
GAAGCTTCTGGACTAATCGACCACCTCCTTTCCTTTCATTTCCTTTCCTAGAGTTGCAAATTCTCTTCAACACGCGCACATGTGACATGCCCCATGGTCGCCGCCGCTCCAGGCATCCTCCCGTGGCCTCACCTCCCTCTCCCTTCCTCCTCCCACCCGTCTGACGCCTCTGACGCCGCCGCAGCAGCAACAGACGCCAACACCTCCGCGTATGACATCCAGATCTTCGAGCCCACCTCCATCGAGGAGCGTCGTCGCCTCCTGATCCAGCGGCGTCGCCTCCGACTCGCCGCCTCCCATGCCTCGCGGCTCACCGTTGCCTCGCGCGTCTCCTCCAAACTCATCAGCGCCACCGCCTCCTGCTCCAGCGGCGTCGCATCCGATCTGCCGCCTCCCCTC…
>Zm00001d016083
ATGCCGTGGTTCCCAGCCGTGCCGCCGGCGCTGGCGGCCGCCGACGAGGCGCGGATCGTCAAGAAGCGCGCGGGGCTGCCGAGGCTGCTGCACAAGCTCTTCATCAAGGTGCTCCGCCTGAGGCCGGCGTTGGCGGCGGAGGAGTACTACGGCGCCTACCGGATGGGCATGGGCGTGGGCGCCGCGGACGAGGACTGCTGCTACTACTACAGCTACGGCGGCGCGGGGTCGTCGTCGTGGGCCGGCGTGCTCTCCTCCATCCCGGAGGAGGACTACGACGACAGCTCCGACGAGGGCACGCCCGACGTCGCCATGCCCGGCCCCGCCGTGCTCCGCAAGGCCAAGTCCGAGCGGTTCGTCGTCGGCCCACCCGACGGCGCCGCCGTCCTGCACGTCGAG…
>Zm00001d016085
ATGCCACCGGCGGGCCGCATTCCGGGGGTCATCGTCCTGGCCCTCGGCGTCGGGGCGCTGGGATTCCCCGACGCGATGCGCCTCGTGGCGGGGCGGCCGCGGAACCCGCTCCTCGACATCGCCGCCTGCGCGGTCGCCATGGTCGTGGCCACGGCCTACGCTCTCGGCACCATGCTGCTGGCGCGTTTCGTCCGCAGCGGTGGCGGTGACGCGCCGCCCGCGGACGCCTTCGCCCGCCTGACCTTCGTCGTCTCCCTCGCCGCTGCGCTGCTCGTCTCCGCGTGCCTCCTCTTCCTGCCCGCGCCCGCGCCCGGCGCCGGCGGCCTGCCCTGCCATACTGTCGACGCCATCGCCGGAGAAAGCGATGTGGTCGTCTCGGCCCTCGTCGCCGTCGGCGCC…
>Zm00001d016103
ATGGCGGCGGCTGGCATGGCCGCCCCGCCCTGCACCGTCAAGACCAAGCTCCTGCTCTGCGCCGCCTTCGGCTTCGCGCTCGGCGTCGTCGCCACCGCGTGCCTCATGACCTCTTCCTCCTACGCGCCGTCGTCCGTCGCCGCCGCGCTCCGACTCCGGGGAGGAGGAGCCCTCGGCCTCTTCTTACCGCCATCCTCCGCCACCAGGGACGCCGATCAGGACCGGCGACCACCGCCAGCGCGTCCGCAGCCCAAACAAGGCGCGGTCTCCGTGCCGGCAGCGATCCCCCGGTCTCGGTCGAGCCCGCCGGGCGCGGGCGCGGGCACGGGCATTACTAGCGCTGCTGCCCCGCCGCCACCTGGTGTTGGCGTTGGCGAGGGACCAGCGGCGCCTTGGCCT…
>Zm00001d016128
GCCGCAATCCACTAGCGTCGAGCCATTACAACTGCTGACTATCAGCTCACACACCTCCGTTCGTAATAGCATAGTAGCCACGCTCTACTCGTCTTAGCTCTCGAAGTGCCACTGCAGTCTTCGCCGGCCAGCTCGATCGCCGCACAATGGCGTCACAGCAGCAAACCAGGAAGCAGCAGGCCACCAAGGGCCACCAGGAGGCCGACCGAGGCCAGGCGATGAACCTGGAGGAGATCGGCAAGTACCGCGCCGAGGCGCAGCAGCGGTCGGCGGACGCCATCCGCGCCGCCGAGGACCGGTTCCACAAGGCCAACAACCAGCAGGCGCCCGTCGCCACTGTGGTCCCGTATCAGGAGAGCGTGAAGCAGGTGGAGACGGAGAGCCACGGCCGCGGTAGCC…
>Zm00001d016159
ATCTACGTTCTACTCCCACTCGCGGTCGCGGTAGCCGGCGGCGGCGGCGGAGGAAAGCAGGCAGGCCATGGCGTCGTCGTCGTCGTCGACCCCGGCGGCCGTCCGCGAGATGCAGAAGGATCTCGAGGTCCAGGCCAACGCCCTCAGCAAGATCCAGAAAGACATCGCCAAGAACCACCAGGTCCGCAAGCAGTACACCATCCAGGTCGGCGAGAACGAGCTCGTCCTCAAGGAGCTGGAGCTGCTCAGCGATGGGGCCAACGTGTACAAGCTCATCGGACCGGTGCTGGTCAAGCAGGACCTCGCTGAGGCCAAGGCCAACGTCAAGAAGCGCATCGAGTACATCTCCGCAGAGCTGAAGCGGATGGATCGGGCGCTCAAAGACTTGGAGGAAAAGCA…
>Zm00001d016163
CGGTCAAACATTTCCCGCCCAATCAAACCCAAACCCTCACCGGCCACCGCTCAGTCGCTCAACAGACGCCGCCTCCTCGTCGCCGGCGACCCCAGGTGGGCAAGGCAAAGGCGAGCCACCCGTGATCTGATCCGCCCATCTCACTCTCTCTTTCTCCACCTGAAACTCCGGGCATTTCGTTTTTGGGTAAGATTCAACATCCGCATGCTCTAATCGGGCGCGCAGCTCGGTGAGGAAGGAGATGGAGGAGTTCCAGGCGGCGGTTCGAGGCGGAGACTCGCGAGGAAGTGCGGAGGCTGAGGCTGAAATCTACAATGCAGGAGGTGCAGAGCAGTGCGATGTACTCGAAGTCTCGAACAACACAGAGATTGCTGCAGGAGAAGCTAGGAAGCCTGATCT…
>Zm00001d016164
GAGGAAAAACTTTTTTGAAAACAAAAAACCCCCCACTCCCACGTCCCACCACCTCGCCTCGGCCGCTGCGACAGTGCATACGCCCCCTCCCCTCCTGACTCCTGTTGCGTATACACCGTATGTGTCTACTGTGACTCCGGGTCCCGGGGGGGTAAGCGACCGAGCAAGGCTTCGTCTCCGGCGGCGGAGGCGGATCTGGGAGGGATGGGGAACCGGATAGGCGGGCGGCGCAAGTCGGGGGTGGAGGAGCGGTTCACGCGGCCGCAGGGTCTCTACGACCACAAGGACATCGACCAGAAGAAGCTGCGCAAGCTCATCCTCGAGGCCAAGCTCGCGCCCTGCTACCCGGGCGCCGACGACGCCGCGCCCGGCGGAGGGGACCTCGAGGAGTGCCCCATC…
>Zm00001d016183
CATCTTTGTCAGTAGACATTCAGATGTCAATCTAGCAGTGATGGATGACAGTTCAGTCAAAGCAGAAGACCAGACAATGTTATTGGAGGAGGGTGGCCAAGCAATGGCTGCAAAGCCAGCTTATACTTCCCTCACATCACAAATACTCAGACTTATATTCATGGACCAGTTGCTTCTGGAGAATCGTTTAACACTGAGGGCAATATCCGAATTTGGAGGGTATCTACTTTATTTTTACATATGTGATCGTACAAACCTGCTTGGAGAGTCTGCCAAGAATTACAGTCGAGATCTGTTCCTTTTCCTCTACTTTCTTCTTATCATTGTAGCAGCTATGACTTCCTTTAAGGACATCAAGCAGAGGGATGAGTTCATCTGTGTTCAGAGGGAAATCCGGCG…
>Zm00001d016193
TTAGCCCGAATGGCACTGATAATTTTGCTACAGCTTCAAGTGATCGCAAAATAAAGCTTTGGAGCCATTCTTCCCCCACAGCGGAGTATACTCTGTGTCACCATAAGAGAGATGTGAGCTGCCTGGATTTCTTCAGAGGTGACGACAGTAATCAATATTTGATTAGTGGCTCTGGTGACTATACGGCCAAGATCTGGGACTTGCAGAAAAAGACTTGTCTTCATACATTGGATGTTATGTCTCCGGTTACTTCTATCATTTCCCTTCCAAATTCTCCATATTTGATTATAGGTTCGGAAGACGGAACTGTTCATTTGTGGAGGTCTCCTAGTTTTAGGATTGAGAGAATACTTCAGATTGGCTGCACAAGACCTGTTCGGAGCCTATGTTTGGTGGGGT…
>Zm00001d016238
TCAACAAGCAGCGGGCGGGTCTCGGGCGGCGCGCGGGCGCTTGGTGGACGACACTCAAGCGGAGGCGGGCAGCGCTTGGGAGTCAGGCATGCGACCTTGCGGCGCTAGGGAGTCGGGTGTGCGACGGGCGGCGCTCGTTCCTCAGGCATGTGCGGACGATGCTCAGACGACGCCGACACAGGTCCAGGTCCAGGTCCAGGTTCGTATTGTTCTTTGGTGTGTGGACGTGATTCTTCTAGTGAGATATGTTCTGAAGCGGCAAGGTAAACCCTCTTAGTCTACTAGTTTAACTTTTAAAATATACCCATCGGTTTGAATGATGCAAAACTACAATAATCTTCATGTACTTGATTGACTAATGAGTTGGATATGATTCGTATTCTATTTCTTAAAAAAGTA…
>Zm00001d016242
ATGGGCGCCGACGCCCGCGTCCGCCTCCTCCTGCTTCTTCTCTTCCTCCTGGACCTCGGCTGCAGCAATGGCGGCGGCCGATGCTCCTCGGCGCAGACGATGCTGCCGGCCCAAGAAGTTGAAGCACTCAAAGGTATAGCCTGCAAGCTTAACAAAGCAGATTGGGATTTTAGTGTGGATCCATGCAGCGGATTAGGAAATTGGGTCAATGTCACTGGTTTGCTTAGCAGTAATGTGACATGTGATTGTTCATTCAACAACCACACCGAGTGCCATGTTATCAGCTTGGAGCTTATGCGGCAGAACCTTAGTGGAGTTCTACCAGATGAAGTTGTCAATCTTACTTATCTGCAAAATCTTGACTTGTCACGCAACTCCATCCAAGGACCAATTCCAGCA…
>Zm00001d016277
GGGCTGCCTGCTCACACTTCGCCACTACTGCTGCTGCGCGTTGGCGAGCGCGCGTGGTTCACGAGCGAGCTCCACCACAAGCCCAGTCGCGCACGGCAGCCGTTTTGCTTGTTTTGTTTGCTTTCCGCCTCTTCCGTGCTTCCTCTTTTGGGCGGCCTGGCTGGGCTAGCTAGCTGTTCTGTTCATTCCGAGTTCCCGGCATAGAACACGAGGTTGGAGTTAGAGGCTTACCGAGGGAGCAGACAGCAGAGGTCACTAGCGATTTCACAGTCACGCACCTGCATTTCTTCTTTTTTTTCTTCTTCTTTTCTTTAGCAAGCTCTCTTTCTTTTCTTGCTCTTGTTTTGTTTGTCCTCCCTGTAATAACTCTTGCCTGCCTTCCCCTACCCTGGTCTCTTT…
>Zm00001d016280
ACCACTTCTACGGGAGGGCGCATCCCGGCCCTCCGCGCGACCTCCACTCCCGCCGCGCGCGCTCAGCCGGCCCCGCCGCAGCGCCACCACTCCTCCTGGCACATCTTGCTCCTCCGTTCTCCGTGCTACCACCACTCCGCTGCGTCGCCATCACTCCCTTCCTGTATCCCGCCACCTCCACGCATGGCCACTCCGACGAGCTGCTGCTGACTCGCGTCATCGAAGTCTGACCACCGCGTCCTGTCCACACGGAGGTTGAAACAGGAGGAAGAGGAGGAGGAAAGGAGGAGAGGGCGACGAGATCCATGGGTGGAGAAGAGGACGATATCCACACGTGGAGGAGGAAGAGGAGATCCGCATGAACAGGAGATGTGGAGGAGAGACTGAGCTGCATGAAGT…
>Zm00001d016298
GCATCTGTTTGGGAGAAGCAAAGCAGGGTCCCTCCGTATTTCCCATGGTTTTTGTGACTTGTGAGAGAGAACAAGGCCAAACACTGAAACACATCTCTGAAGTCTGAGCCCTGACCCAGCAGCGCCAAGATCCGGGACCGGGAGAGGGACCTGCTCCCTGGGGGGTGCCCTTTTTGAGGTTTGTGTGTTCTTTGCCTCCCTCCCCTTTAATTTTCTTTTAATTTCCCATGTCATGCATTGTTGCCTGAGAAGTGATGGCGTCTCCCGCTGCCGTGCCCTGCCCCCCTTTGCTATCCTGCTCCTTGCAGGCGTTCCATTTGGAAGTGTTCATCTTTCCATTTTAGAGGACGTCCATGGGGGGTCATGGGGAGCTCAATCTTCGAGTTTTGATATATTTTT…
>Zm00001d016299
CCCTTCTCTTCCACCTCAATTCGTGTCGCCTACGCCTCTCGCTCTCCTCCCGCCGCGCGCGCGAGAGGAGGGAAAGGGAGGGGAGGAAGCCGGCGGGGGGCGCGCGGCATGGACGCGCGGGCCAGGGAGGCTGCAGAGACCAGCGGCCCCGGGTTGCCGCTCGCCGTGCGGGAGCTCCTCGCCGGAGGGGTCGCCGGGGGAGTCGCCAAGACCGCTGTCGCGCCGCTCGAGCGCGTCAAGATCCTGTTCCAGACAAGAAGAGCGGAGTTCCATGGTTCTGGATTGATTGGATCCTTCCGAACAATCTATCGGACAGAAGGTCTTTTAGGGTTTTACAGGGGAAATGGAGCTAGTGTTGCTCGAATTGTCCCGTATGCAGCTTTGCATTATATGGCCTAT…
>Zm00001d016308
GAGGAGAGAGAGAGAACGGTGCGCCCGCCTGCTCCTCCTCCTCCCCCTTCCGTCATTTATAAGCGACGGCAACACAGGCGACGAAGCCGGGGAGAGGGGGGCGCACGAGGCAATTTATAGCGAGGAGAAGAGGAGCGGCCGGGCCCGAGCAGAGCAGGCCGGGCCAGCCATCTCTCCTCTGCGGCGTCGGCGCCCGGGATGGGGGACTCTGGCGGCTCCGTTGTGTCGGTCGACGTCGAGCGCATCTCCTTCGGCGGCAAGGAACACCATATACAAACGAATCATGGACCTGTATCTGTTGCAGTGTATGGTGACCATGACAAGCCTGCCCTTGTTACTTATCCCGATATTGCTTTAAACCATATGTCCTGCTTCCAAGGACTATTGTTCTGTCCTGAA…
>Zm00001d016322
GTGAGCTTCTCTTTCTTCCTTATCTCCTTCCAGCCGAGCTCTGGCGCTAGGTTTCTCTCCCAGTGCCGCCGACTCCTGCTCGTCGAATCCCCTCTACTCACCAGGGCGCTTGGCTTCCTCCTTCCCTGCCGCACCGTGCTCCTCTGCTCCTCCCTGCTGCCAGCTCGGCCGTGCCCTGGCCATGCTCCCTGCGCTCGCCAGCCGTGCGCATCTCCCTCTATGCACGCGCGCCTGCGTCCTGCGCCGCGAACCCCGCCGTGGAGCTTCCTCGAGCTCGCCCCATGGCGCCCGGCCGAGCTCCTCCCTGTCGTGCTCTTGCTTGGCGTCCAATTTTCCTACACGTCGCGGTCTTCCTCCCCGAGCTTGCCCTAGCCCCTTGTATCCCCCATGGCCGGAGCT…
>Zm00001d016396
ATGGGCGCGAGCCGTCTGGAGCAAACCGATGCTCTCTTCAGGAAAAACCTTGTAATCCAGAGGCGCGCCTGCAAGACGAACTGCTGCCTGATCCTGTTCCCGCTGGCCCTCTGCTCCGTCATCGGCGGCTTACAGATCGCCATCAACCACGCGTCGTCGCAGGGGGGAGGAGGAGGAGGAGGAGGAGGGGGTGCGACCCCTGCCATCCGTCTCGACTGCAGCTGCAGCAACGTCAGCGTAGACGAGAACGCGCTCGGAGGCATACAATGCCCGGACGAGTGCCCGTTGCCTCGAGCGCCCAAATGGCCTCCTGTCGTCAGGACCCCGTCGCCCGAGTACCGGGCGGTCCAGGACGGGCTCTTCCCGTTCGCTGATCTCCCGGACGCTTCGTGCAGAGCC…
>Zm00001d016417
ATGGTCGACCTCGCCCTCCTCCTGGCGGAGCGCGGTGCGCGCGCGAGCCTGGTGACGACACCGCTGAACGGCGCACGGCTGCGTGGCGTCGCCGAGCAGGCCGCGCGCGCCAAGCTGCCCCTCGAGATCGTGGAGCTCCCGTTCCCGACGGACGTGGACGGCCTGCCCCCGGGCATCGAGAACATGGACCAGGTCACGGACAACGGCCACTTCGTCCCCCTGTTCGACGCTCTGCAGAAGCTCGCCGGCCCGCTGGAAGCGTACCTGCGAGCGCAGGCGCCGCGCCCGAGCTGCATCGTCTCCGACTGGTGCAACCCGTGTGCGGCCGGCGCGGCCAGAAGCCTCGGGATCCATCGCCTCTTCTTCCACGGGCCGCCGTGTTTCTACTCGCTCTGCGAC…
>Zm00001d016424
ATGGGAGCCTTCATGACGCACTGCGGCTGGAACTCCGTGCTCGAGTGCGTCGCGGCGGGCCTGCCGATGGTGTCGTGCCCGCACTTCACCGAGCAGTTCATGAACGAGAAGCTCGTGGTGGATGTGCTATGGGTCGGCGTGCCTGTCGGCGTCAAGGGTGCCGCGCAGTGGGGCGTGGATGCGGAGGGTGTGCTGGCGACGAGGCAGGACGTGGAGAGGGCGGTGGCTGCGGTGATGGACTACGGGGAGGAGGGCTCTGCGCGCCGGGCAAGGGCCGCCAAGCTCGGCAGGAAGGCTCGGGAAGCCGTGGTACACGGTGGCTCATCGTTCCGGAACGTGGCGCTGCTCATACAACACGTCCAGCAGCGAGCCAGCACTAGAAATCCATGGATTGAAAAG…
>Zm00001d016429
ATGGTGCCCACCGAGGAATCGGCTGCTGATACGCCAGCGCCACCGCCGCCGCCACCTCACTTCGTTATCGTCCCCCTCGTGGCGCAGGGCCACACCATCCCCATGGTCGACCTCGCCCTCCTCCTGGCGGAGCGCGGCGCGCGCGCGAGCCTGGTGACGACACCGCTGAACGGCGCACGGCTGCGTGGCGTCGCCGAGCAGGCCGCGCGCGCCAAGCTGCCCCTCGAGATCGTGGAGCTCCCGTTCCCGACGGACGTGGACGGCCTGCCCCCGGGCATCGAGAACATGGACCAGGTCACGGACAACGGCCACTTCGTCCCCCTGTTCGACGCTCTGCGGAAGCTCGCCGGCCCGCTGGAAGCGTACCTGCGAGCGCAGGCGCCGCGGCCGAGCTGCATC…
>Zm00001d016435
ATGCGCGCGGCCGACGGCGCAGTGGTGAACACGTTCGTGGGCCTCGAGGGCCAGTTCGTGTCGTGCTACGAGGCGGCGCTCGGCAAACCCGTGTGGACGCTGGGGCCGCTCTGCCTCCGCGAGCGGGACGCCGACGCCATGTCGTCGCGGGGGGCGGACGGCGGCCAGCAGCACAGCGCGGTAGCCGCCTGGCTCGACTCCAAGGAGACCGGCTCCGTCGTGTTCGTCAGCTTCGGCAGCCTCGCGCGGAAGCTCCCGAAGCAGCTGTTCGAGGTGGGGCATGGCCTGGAGGACTCCGGCAGGCCGTTCCTGTGGGTGGTGAAGCTGGCCGAGGCGTCCCCGCCGGAGGTGCGGGAGTGGCTGGGAGCCCTGGAGGCGCGCGCGGCGGGGCGGGGTCTC…
>Zm00001d016438
ATGGAAAACCCGGCGCCGCCGACCAACCCGGCCTCCGCCACGCCGTCGCCGTCGCGGCAGCTGCCGGACTTCCAGCAGTCGGTTCGTCTCAAGTACGTGAAGCTGGGGTACCATTACCTCATCACCCACGGCATGTACCTGCTGCTCACCCCGCTGATGGTGCTCGTGGCCGTGTACCTCTCCACGCTCTCCCCGCGCGACGTCGCCGACCTGTGGGCGCACCTCCGCCTCAACCTCATCTCCGTGCTCGCCTGCTCCACGCTCCTCGTCTTCCTCGGCACGGCCTACTTCCTCACCCGCCCGCGGCCCGTGTACCTGGTCGACTTCGCCTGCTACAAGCCCGGGCCGGAGCGCCGGTGCACGCGCGACACCTTCATGCGCTGCTCCAGGCTCACCGGC…
>Zm00001d016457
ATGATCACGGTCGATGATGATCAGGTGAGGAGCTGTGGCGGCGACAGCGGCGGTATTCCAGTTCCTACTAGCGACGACGCCGCCGCCGGGCGGCAGATGCTGACGACGATGGGCGAGCACCACCAGCAGCAGCTGACGGTGTCCAGGATCCGGACGGCCGTGTCCATGCTCACCCGCCGCACGGGCCACGCGCGTTTCCGCCGCGGCCCCGTCGCGGAGCGTCACCACGCATCGTCGTCGGACCATCATCAGCTGCGCCCGCCGGCGGCCGGTGGCGGCGTGGCGCTGGACCTGGACTTACTCGTCGCCAAGACGTGCGACGACGCGGCGGCGGGGTTTAGCGCGTCGGCCTCGTGGACCAGCTCCTCGCTGCCGTCGACGACGAGCCTCACGGCCGGC…
>Zm00001d016477
GGACTCTGGAGTGTCCTCCGGGCTAAGCAAACCCATAGCCCGATCAGATCGATGGCACCGGCGCCCCGCGCTTCCAGCTTCTTCTCGGTGCTCCTCGTCCTCCTCTTTGCGCTGTCGGTGGGGTGCGCGTCCGCCACCGGCGTCTTCCAGGTGCGCCGCAAGTTCCCGCGCCACGGAGGACGGGGTGTGGCGGAGCACCTCGCGGCGCTGCGGAGGCATGACGCCAACCGCCACGGCCGGCTCCTTGGCGCCGTCGACTTGGCCCTCGGCGGCGTCGGGCTCCCCACAGATACCGGCACAGCCTGTACTACACCCGGATCGAGATCGGCTCGCCGCCCAAGGGCTACTACGTGCAGGTGGACACCGGCAGCGATATCCTCTGGGTCAACTGCATCCGCT…
>Zm00001d016552
CCCCAAATCTGCCGAGGGGATTAGCCGATCGAAGCGTCATCGGCGGCTGCGACAATGGCGGGGCTGTCGCTGCGGTGCGGCGACTGCGGCGCGCAGCTGCGGAGTGTGGAGGAGGCGCAGGCGCACGCTGAGTCCACCAACCACGCCAACTTCGTCGAGTCCACTGAGGCCGTCCTCAACCTTGTCTGCTCCAACTGCGGCAAGCCATGCCGCTCCCATACCGAGGTGGACCTGCACACGAAGCGCACGGGCCATACGGAGTTCGCGGACAAGACCGCGGAGGCGGCCAAACCCATCGACCTCGAGGCGCCGCTTAAGCCGGCCTCCGATGATGCCACGGACGTCGATGCGTCGGCCTCGGCGACTGAGGAGACACAAGAGACGGTTGTGCCAGAGGTG…
>Zm00001d016557
ACAGCGCAAACCACCTCCCAGCTTTTAGTCAGTATAGTCTGCTGGAGCCCATGGAGGTGCAGCTGGCGACGGAGCAACCGGGGGACCCGTTCCTGCCGCTGCGGTGGGAGAGCACGGGCGACCAGTGGTGGTACGCCACGCCCATCGACTGGGCGGCGGCCAACGGCCACTACGACCTCGTCCGGGAGCTCCTGCGCCTGGACCCCAACCTCCTCGTCAAGCTCACCTCGCTCCGCCGCATCCGCCGCCTCGAGTCCGTCTGGGACGACGACGCGCGCCTCGACGCCGCCGCCAGGAACCGCGCCGCCGTCGCCCGCCGCCTGCTGCTCGACTGCGAGCCCGATAACGACAAGCAGCCCCCATCCCGCGGAGGCGGAGGCGACGCCGCCAACCGCCTCC…
>Zm00001d016567
ATGGCTGACTGGGGCCCCGTGGTGATCGCGACGGTGCTGTTCGTGCTGCTCACGCCGGGCCTGCTGTTCCAGCTGCCGGCGCACGGCCGCATCGTCGGATTCGGCACCATGCACACCAGCGGCGTCGCCATCCTCGTCCACGCCGTCCTCTACTTCGCGCTCATCACCATCTTCCTCATCGCCATCGGCGTCCACATCTACGCCGGCTAG
>Zm00001d016568
ATGGCGGACTGGGGCCCCGTGGTGGTGGGCGTGGTGCTGTTCGTGCTGCTCTCGCCGGGCCTGCTCTGCGAGCTGCCGGGCACCCACCGCCACGTCGACTTCGGCGGCTTCCACACCAACGGCAAGGCCATCTTCGTCCACACCCTCGTCTTCTTCGCCGCCTTCACCATCCTCACGCTCGCGCTCCACATCCACATCTACACCGGCTAGCTAGCTAGTGCGGAGCATATGTTGCGTCGGTCTGGACTCGCGGAGGTCTCAGATCAGAAAGGAACGCCGGCCGGCGGCGCGTCCTGTGTTGCTGCTCTTGTTCCTCTGCAGTTCGATCGATTCGACCAAGTGCTTGTAACTGCCTAGCTTCCTCGTTGCTATGCTAGTTACTCTCTGCTATCTATCATG…
>Zm00001d016577
CCGGCGGCCTGACCCACTAACCCGCCGCACCGTCGTCCCCGCTAGGCGCTGGCCTCTGGCCCCTTGCGGCGCGCGGTGCGTTACAACTTACAAGTAGCGTCAGTGAGTTACAGCCAGCCAAAAGTTACCTACAGCTCACTCCCAACGGAAGCAAGAACCACCGCTCACTCACTCGCCATTCGGCAGAGGCGTGACTGACTGAAACTGAGCACTAGGGCTTTGAGAGTGCAGCAGAGGAGGGCGAACCATGGGCGAGGAGGAGAAGGCGAAGGAGGCGGCGCCCCCGGCCGACAAAGTAAAGGAGGCGGAGGAGAAGAAGGGCGAGGGGGGAGGAGGGGAGGAGAAGAAGAACGAGGCCCCGTCTCTTCCACCGCCGCCGCCGGAGGAGGTGGTCATGCG…
>Zm00001d016619
CAAAAATCTCCTCTCTCTCGCTTCATTTCTTTTTTCTTTCCATCGAATTCCTCGTCACCAACACGCACGCGGCCTCTGCCTCCGCGTCTCCATCCTGAGGCTCCGAATCGATCTCCCTTCCCCACCAAACCGGAGCACTTCGGAGGCCGGACCCGGCGAGAAGCGACCGACCGCAGCCAGCTCACGTCTCCCTCTTCATCCACCATGCTGAGGGTCGCGGGCAGGCGCCTCTCGTCCGCTCTCGCCTGGCGCCCCGCCGCCGCCGCCTCAGGCTCCCGGGGCCCTCTCGCCGGTACACTACCCGGCCGCGACGACGACGACACACGCGACTGCAGGGCGCGTTTCGCCATCGAATCTCCCTTCTTCGCCGCTGCCAGAGGGTTTTCAGCAGAGACTCTT…
>Zm00001d016635
ATGGAGCGTCCGTGCCCGCGGCCGGAGCCGGCGGCGATCGACATCACCTGGGTGTCGTGCCGCGGCGTCAGGTCGTCGCTCCCGTTCCACACGCCGTGCCTCTACGCGTCCGTCTCCGTCACCCCGTCGTCGTCCGCCAAGAACGCGCACGGCCACCGCCGGCCCCACCGCGTGAAGACGCCCACCGACCGTGCCGGCGGCGAGAACCCCGAGTGGGACGCACCGCTGCGGCTCTACCTCCCCGAGCCCGAGGCCTCGCCAACGGCGGCGGAGCTGGAACCGGAAGCGGGCAAGAACAAGAACAGAGGCGACGGCGTCCTTCTGGTGCGGTTCGAGCTCAAGGCAGAGGTGGCCGTGCTCGGCGACGTGCTCGCCGCGTCCGCCGCCGTGCCGGTGCCC…
>Zm00001d016660
ATGGCGAACCCTCGCGTCTTCTTCGACATGACCGTCGGCGGCGCCCCGGCGGGCCGGATCGTGATGGAGCTGTACGCCAACGAGGTGCCCAAGACCGCGGAGAACTTCCGCGCGCTGTGCACGGGCGAGAAGGGCGTGGGCAAGTCCGGGAAGCCGCTCCACTACAAGGGCTCCACCTTCCACCGCGTCATCCCCGAGTTCATGTGCCAGGGCGGCGACTTCACCCGCGGCAACGGCACCGGCGGCGAGTCCATCTACGGCGAGAAGTTCCCCGACGAGAAGTTCGTGCGCAAGCACACCGCCCCCGGTGTGCTCTCCATGGCCAACGCCGGGCCCAACACCAACGGCTCCCAGTTCTTCATCTGCACCGTCGCGACCCCTTGGCTCGACGGCAAGCAC…
>Zm00001d016679
GCCCGCACAGCAAGGGCGTGCCCCCACCCCGACGCCCCCCCGCCTCACCATGCCCCCAGCTCGCCGTGTGATCCATGCCCCCAGCCCAGCTTCCCCTACTACCTCAAGGCCGGTATCCCCAATTCCCCATTCCTTCTCCTCCCTTTGCTCGACTGGAGGTGGTCTGCCCCCACCACCTGTGCGCTTCCCGCTTCCCTGTCCCACCTCACGCTCCCAGGAGGAGACACTCCGGAAGATGGTGGGGCAGCGGCTTCGCGCTCCACAGATGTCGTCGGGTCCAAGAAGCAGAGCCTCCGCGCTCCACGGAGGTCGCCTTCCGCATGGACAACAGCGCGACGAGATGCTACAACTACACTCATGACAGCTTCAATAGCATATCTGCATTTTTTCCTCGTCCTC…
>Zm00001d016691
GGGCCTTTTGAGCGTGCGCCCTCTCTCTCTCTCTCTCTCTCTCTCTCTCCCCTATCCGTGCTTTGTGCCTGTTTGGTGCGCGTCCACCTTTCGGGGTCACCGGCTTCTGCTTTCTTGCTACGCCACCGCGCCTCTCGTCTATTTATGGAGTCCCCCGATCCATGAAGCCGGGGCAGGCCGAGAGTTGTCAACGACGACGTCTGCCGGCAGTGCTCCTGCTCCTCCTCCTCCTCCTTCCCGGCCGCCGCGCGAGCTTGGTGGGTTAGTGTCTCTTCTTCGCGGAGACCTGTGAGAGGAGCCATCATCATGGCCGCCGTTGAGACTGTTGTCCTCAAGGTTGCTATGTCATGCGAGGGTTGCGCGGGGGCGGTCAGAAGAGTGCTCTCCAAGATGGAAGGA…
>Zm00001d016697
ATGGCCACGCGCCACCTGCTCCTCCTCCTGCTCGCCGCGCTGCTCCCGGCGGCGGCCACGGCGGACCCGGACGCGGTGCAGGACTACTGCGTGCCGGACACGGGCGGCGGGCGCGGGCGCGGGCGGGCCGTGGATCTAGCGCTGCTCCCGTCCTACCCGTGCAGGAGCCCCGCCAACCTGACGGCGGCGGACTTCGCCTTCGCGGGCGTGCGCGCCGCGGGCAACTTCTCCGCGGACACGGGGTTCGCGGGGGTGTCGGTGACCCCCGCGCAGTTCCCGGCGCTGCACACCCTCGGCGTGTCCTTCGCGCGCGCCGACCTGTCCGCGGCGGGCGGGGTCAACCCGCCGCACTACCACCCGCGCGCCACCGAGACGGCGCTGGTCCTGGCCGGCCGCGTC…
>Zm00001d016714
AACGGCGTAGGGCGTAACGTCCCCTCCCCCGTGAACGGTGTACCCGACCCTCTTCGCCGGCCGTCGCCTATCCAAATCCGTCACGGACGCTTCCACGCGACCAAGCAGCCACGCGGCGCTGGTCTGGCCGGCCATGTCCTGCCTCGCGGCGCCGCCGGCTGCACCGCCAAAGGCGGGGGAGCGCATGCTCCGCGCCGCCGCTCCTTTGCGCTCGCCTTCGCCGTGCCGGGGCCTGCATTACGCGGTGCGGGGGACTGGAGGGCGAGAAGCCGGGTGCGGCCGGCGGCAGCTGGCGCTGCTGCGGTGCTCCCCAGCTGGCGAGTCCAGGGCGTCCGGGGACGGCGGCCTTTCCAGCTTCTGTATAATTGAAGGTCCAGAGACGATCGAGGACTTTGCTCA…
>Zm00001d016740
ATGGCGCCGCTGCCGCAGGCCGTCCACCTCCTCCTCGCCTTCGCCCTCGCGCTTGGCTGCCTGGCGGGCGGCGCCACCGCGACGGTGGTGACGACGTGCAGGGCGGCGGCGGACAGCGACGCGCGCGTGGACTACGCGTTCTGCGTCGCCGAGCTGGGCATGCACCGCGAGAGCCCCGACGCCGACACCTGGGGCCTCGCCAAGGTGGCCGCGCTGACGGGCGTCAACAACGCCGACAACGCCGTGTACGACATCAAGGCCCTGCTCGCCAACAAGAGGCCCGACGGCCCGACGCGCGCGGCGCTGGAGAAGTGCGGGAGGCTGTACGGCTCCGTCGGGTTCGCGTTCGCCGAGGCGGACGACGAGATCAACAACCGCCGCTACGCCGCCGGGAAGGCC…
>Zm00001d016744
TTATCTTCCTCCCAAGCAACCGCTTCTCGCCGGGCGCCGGCGGCAGCTGCCACGTGCCGCCACCGTCTCATCGCCTCGCCGTACTAGCCCCGCGGCTTCGTCAGCCGATGAGCCGCTGCCCTGTGAGCTATCCTCTCCTGGTCGGCCGCTCCCCCCTCCTCTCTTCTCGTCTTTTTCCGTGACCCGCCCGTTCATTCGCTTCGTGCGTGCGTGGCGCAAGTCGGTCCCTGTGCGGTGATCGTTGTGTTGCCAACGGAACCAAATTTAGTAGAGTGCCCCCCTTGTGCGATAGCGTCTGCTAATTGCTCCTGTTGGCGCGCCTCGACATGTTGGCGTTGGCCCCCAAAGTTCACTCGAGTTTATTTTTTAAAATAAATAAATAAATAGGGGATCCCTACC…
>Zm00001d016786
ACAGTCAACTGTGTTCTAGACAGTTGAGTTCAAAAAGGTGAGGCGGCGAGATCGAATCAAGCGGAGCGGAGCCTACACATGGCGATGGCGCTGCGTCGGCTGCTGCTTCCTCTCCTCCTCCTCGTACTCTTAGGTCTGCGGCCGCAGAGCTGCGTCGCCAGTGGCGGAGGTGGAGGGGAGCCGGCGGAGTTCGAGATACCTCGGGACGGGAGCGTGCTGGAGCTTGACGAGAGCAACTTCGAGGCGGCGGTGCGCGCAGCCGAATTCCTCTTCGTCGACTTCTACGCTCCCTGGTGCGGCCACTGCAAGCGCCTCGCCCCGCAGTTAGATGAGGCTGCTGCAGTGCTAGCTGGACTGAGCACGCCCGTCCTTGTGGCTAAAGTAAATGCTGACAAATAC…
>Zm00001d016794
GCAACGGAACGGAAGCGCAGAGTGGATCACTCACTACAGGCGCGTACGTGCTCATGTGAGCAACAGAGCGTCACAGGTTTCCTGTGATCGATCCCATTGGTCTTGGTCTGGTCTGGTCTCTGTTTGTTTACACTGTCTCGTCACTGATCCTGGGCGTGTCTGCATACTCACCGGCACGACCTTTATCGATCCGTCATGGACACCGGACGACGGCGCGCAAAGAAGGACGACGCTGCCGCGGCGCTGGTGGCGCTGGGGTCTTCGGTGTTCGTGCACGCGGACACCGTCGACGTGGCCCTGATGGTGCTCGGTCTGGTCGGCGCGATAGGCGACGGCATGGCCACGCCGCTGCGGCTGCTCGTCGCCAGCCGCATCGCCAACGACCTCGGCAGCGGCCCC…
>Zm00001d016801
AGGCTAGTTTGCGTAAAGTACGATGCGCCTCCCGCTTCTTCCACGGTCTCCTCCCCTCGCCGCCGCCGCCGCCGCCGCCGCCATGCCTCCTCGCCGCCGTCGCGTTGTCAAAGCGACGCCGCTCAAGCCGTCTTCTCCACAACTCTCCTCTACCCCGCCACCTACCCCGTCTGTAGAGGTACCCAAAACCGAACCCCCCGATCACCACGATCCCACTCCCTCCGCCCGTCGCCGCCTCCCCCTCGCTGCCGGGGCCGTTGAGGCGCAGGAAGAGTGGCATCCGCTCCCGCTCTCCACGGCCGACCTTTCCCTCCCGCTCACCCTCCCCACCGGCCAGACCTTCCTTTGGCGCCGCACCTCCCTCTCCCCGCTCCGCTTCACCGGTGCCGTGGGGTCCCA…
>Zm00001d016802
GACGCCGAGAAGCCCCTCGATGGCGAGGCGAAGGCGCGCAGCAATCCTGCCTCGCTTCCCTCCAAATTCCCAAAGCTCTCGCGCGCGGTGCCATGGCGGAGCGCCTCGCCGCCTCCCTCCTCCCTGCCGCCTCGCCGTCCCCGTCCGCCCGCCGCGCAACGGTCGCAGCCGCAGCCGCCGCCTCTTTCCCCTCCCCATGCTCCGCCCGCGCGGGGCTGCGCCTACGCTCCCGCCCGCCCCTCTTCTCGCAGAAGGCGGCCGGGCGCGGGTGTGGCCTGCGGGTGGTGCGGTGCATGGCAGCGTCGGACGCGGTGCAGCTCAAGGCCGCGCGGGAGGACATCAAGGAGCTCCTTAAGAGCACATACTGCCACCCCATCATGGTCCGTCTGGGGTGGCATG…
>Zm00001d016806
ATGGCGACATCCAAAGCGGTGAGTAGCGGTTTGAGCAAGAAGGACTGCATCGGGAGGTACTACGCCAAGGATGCCACCAAGTACAGGCCGTTCAGCGCGCTGCTGCCCGAGGGGGGCTGGAGCGGCAAGGTGCTGTACGTCAAGCTCGTGCTCGTCCTCCTCATGTGCGGCTCCTTCATGGGCCTCCTCAACTCGCCGTCCATCCACCTCGCCGACGAACGCCACCACCACGCGCAGACTGCAGAGGCGTGGAATGCGAGCTGGACGTCGCACCCCGACGCGGCGAACTCCGGGTACGCGTCGAGCCTGAGGATCGACTGGTCGCAGGTCCAGACAGCGGCGAAGCAGGTCGCTCCGCCGGCGGGCGGCGGCGCCACGCGTGTGGCGCTGCTCAACTTC…
>Zm00001d016827
ATCTGCTAGTGTATTTGAACTGTAACATGTTCTAGGAAAGATGCTAATGGACCGAGAGTCCGAGACAAAAGAATACATATTCGCAGATGGTTCTAGCTCACGGGTTTGACCCTCAATCACAACTGAAACAACTAAATGTGAAACTTCCGGAGTACCTACCACAACAAACCACGAGGAGTTGCAACTGGTAGCAAGTAGCAACTATAAATTCAGAACTACTGTATCAGGCCACCTAGTTCATGCGGCGTGATTACCTGATTGCTTTCTCATGTGGTGTGATTACCTGATTGCTTTCCTGCTTACTGGGAGCAATGGAGGGTGGAGCTTCCACTTCACCGAATCAAGGTGCCTTCACGACTTCCCCTTCCGACCGCGCATCGCTAGCTCCCGCAACGACCC…
>Zm00001d016832
GTCCCGCTGGTGTGGTGGCGTCCTTTTTTTCCGCCGGGAGATAAACCGACCGGACCCCTGACTGCGACCCGCAGCTGCTCCTGCTTCCGATCCGAACTTCTCTCGCCCGCCGGTTCTTCGCGAGCAATTCTTATAAAGCATCATCATCACCACTTGTGATGGGTGGAAGCCAGTACGATGATGAATGGGTGTTGCCCAGTGCCGATATCACTCTTGTTCTTGTTGGGAAACTTGGCTATGGAAAGAGTGCAACTGGAAATAGCATCCTTGGACGGGAAGCATTTGTATCAGAATATTCACATTCTGGTGTTACTAATACTTGTCAGCTGGGAAGCACTACCCTGATGGACGGCCGGACCATCAATGTTATTGATACACCAGGGTTATTTGATATGAGCA…
>Zm00001d016841
ACGGACCAAGTAGAAGCAAGTAGTAGGCATGGCGGAGGCAGAGGCCCATGGCATCGTCATCGTCGGCGGTGGCATCTGCGGCCTAGCCACCGCTCTTGCTCTTCACCGGAAAGGGATTCCTAGCCTTGTGTTGGAGAAGTCCAGGAGCCTGCGAGCGGACGGCGCGGGCATCGGCGTGCACGCCAACGGATGGCGAGCTTTGGAGCAGCTTGGCGTCGCCGCGGAGCTTAGAGAGACTGCACAGCTTATCACCGTGTACCATGACGTGTGGCAGCAGGGAGACAAAACGAGCCGGGAAAAGGTTCCAGTAAGGATGGAGCTCCGATGCTTAAACAGAAAGGACCTGATCGAGGCACTGGCCAAGGACATCCCTGCAGGCGCGATCCGATTCGGCTGCCG…
>Zm00001d016850
TATTTCGTTTTGTCTTCTGACTCCGGTCCGGTAAGTAATCAGAGTCCAGGCGGCAGCACAGCAGCTTCCTTTCCTCCGGCGATGGCGAAGAATCCCAAAGATGCCGCTCCGGAGGAGGAGATGCCCGCCGCGGCCGAGGAACAGGCAGCGCCTGCCGCGACGGTGAAGGTGCTCTTCTTCGCCCGCGCGCGGGACCTAACGGGCGTGGCGGATTCCGCGGTGGAGGTGCCGCCGGGGAGCACCGCGGGGGAGTGCCTCGCGCGGGTCCTAGCCCAGTTCCCCAAGCTGGAGGAGATCCGGGGCTCCGTCGTGCTCGCGCTCAACGAGGAGTACGCGGCCGACTCGGCCGCGGTCGCCGACGGCGACGAGCTCGCTGTCATACCGCCCATCAGTGGCGGC…
>Zm00001d016851
ATGTCCATGGAGGACGACGCCTCGAAGATCAGCGACTGGGAGGTGCTCTCTGCCACCTCTTCCCGCGGGGGCGGCGACGACGATGAGGTATTAACTGTCTCCGGCGGGGGCGGTGACGTCGTCCTCCTTGACCACTTCGTCCTCACCCCCGACCCCGCAGCCTCCTGTCCCGGCGACGGCGAGGGCTCGTGGTCGGACGACCGGGGCGCCTGGCAAGGGTTAGAATTATTGGATGGATTCGATCCGATTCCGGAAGCAAGTTTCGATCTTGCAGTTGGTGTTAGGAGCCAACAACTGCTGATAAGCGACGTGGATGACGCCCGCGAAGAAGGCTCGATTGTTCAAGCCACCGTGGCGCGCGGTGCGACCCGTAGCGCAGAAGGAAATCAAGATGATGTG…
>Zm00001d016864
ATGGCGAGCGGAGGGAAGGGACTCAACGCGACTGGGGAGTTCTTCCGGCGGAGGGACGAGTGGAGGAGGCACCCTATGGCGGGGAACCAGCTGCGCCACGCCACACCCGGGCTCGGCATCGCCATCGTCGCCTTCGGGATCTACCTCGTCGGCGAGGCCGCCTACAACCGCCTCTACCGCCCCTCCGGCGACAACCACCACTAG
>Zm00001d016866
CACCAGAGCGCCAAGAAGGGAAGGTTGGCTTCTCCTTCCTACCCTTTCCGCGCTGCAACCGCCAAATTCTCCGACTGCCTCGCACTCTCGCAGCACGTGGGGGGTGATTCTCTCTTTCTTCTCTTCCTCAGCCGCCAGGAAGGTGGATTCTTTTCGAGCTCTTGCCCAGCTGATTATAGGTAGGTACGTGGCTGGATAGACCCTACTGCTGGATAGAGCGTCTCAGGGACGGGTTGACTCTTTCTGGCCGCATCAGCGGCCGGCTATTCTTCTTGTCCGGCTATCCGTTCCAGGACTTCGGATTAAGAGGCGACGAGATGATGCGACGCTGCGTCTCGGCGTTGGCCCGCCGCCGCCGTCCAGATCGCACGGTTGATACTATGAAGGCACGATTCCAAT…
>Zm00001d016896
CCCGATCGAGTGTAAAGCTACTTGGGTCATCAAGCGTGCAAGGTCTCAATCTCGCGGTAATGGCGAGGCCACACGTCGTGGTTGTGCCGTACCCATGCTCCGGCAACATCAACCCAGCGCTGCAGATCGCCAGGCTGCTCCACCGCCACGGCGTCTACGTCACCTTCGTCAACACCGAGCACAACCACCGGCGCGTGCAGGCCACCGAGGGCGCCGGAGCCGTGCGCGGCGGGGAGGGGTTCCGCTTCGAGGCCATCCCGGACGGCCTGTCCGAGGCCGAGCGGGGCAAGCAGGACTACGGGCGCAGCCTGGCCGTGTCCACGAGCACGCGCTGCGCTGCGCCGCTCAGGGACCTCATCGCGCGGCTCAACGGCACGCCGGGCGTGCCGCCGGTCACCT…
>Zm00001d016899
ATGGCGTCGTCTCTCGGCTCCGACGACAGTGCCGGCTCCGCCGCCGCCGTCTGCTGCATGTGCGGCGACCATGGCCTGCCGCTGGAGCTGTACCGGTGCGACCTCTGCCGCATCCGTACACAGCACAGGTCAGCGTTCTCGGCGGACCCCAGGAAGCCGATCAAGAAGCCTGAAAAGGGCCGTGAAGAAAGAGCGGTGCAGCGGCCGGAGCCGGTGCTCACGACGTTGTCTAAGGAAACGAGGGGGGTGGTGCAGCCTGCCAAGCCGCGGTTCAAGGTGAAGAAGGTGCGGCGGTACAAGTTACTCGCGGAGGTGATCTGCTAGTATCAGTAATTTAGTATAGTAGTAGTCAGTGGCGGAGGACTAAATAAAATTAAGATATAGACTGGGTCGCTGGGC…
>Zm00001d016933
CTTCCTAATTTTCCTTTTTCTAGAGCAGAATCTGATATGTGTTTCTACTGCTCCTTGCAGTGTTGTAGTCTGAAGAATTCGCTGGCGGTGGTGCAGCTTGGCTTCCTCTGCTTCTTTTTGACGATCAACTGTCAGGGAACGTAACGTAACTACATGGTCACAATTTTGATGCTGGAGCAAGGCACTCATGGACCGGACAGACACATCTGGATTTGTTACCGGTGGATCAGACGATGAGTACCGGTTCTGCGGGTGTCTTCCTGCACCGTGGAAACCAGGCTCTCATGGATGATTCTGCAGTGCCAATTGGCTTCTCAATGACGAGCTACACGACAGGTAACCAGTTTCAGAGTCGGATAACATTTGGTATAGACCAACTGGGTTCAGCAGTGAACAATA…
>Zm00001d016947
ATGGCGCCTCGCAGCCGCCTCCTCGACCTCGAGAAGCACGACGTGCTCTTCTTCTACGGCGATGGCGCCTACCACCAGAGCGAGCGCGTCAGCGTGGTCACCAGAGCGATCGCCTTCTGGCCCGTCTTCCTCGTCGCCGCCCTGCTCCTCCACCTCATCGCGCCGTTCCCGCACGTGGCTGCCGTCTGCGGGGCGCTCTACGTCTTCCTCCTCGACCGCGCAGCGCAGGCGAGCTGCTCCAGCTCGTGGCCTTCCACTGCCACTGCCGCGCCGCCGGCAGAGGCCTCTCGCCCCACTACTCGGTGCACAGCGGCAGGCTATACGGTCGTGCAGAATTGA
>Zm00001d016948
ATGGCGCCTCGCAGCCGCCTCCTCGACCTGGAGAGGCACGACGTGCTCTTCTTCTACGGCGATGGTGCCTACCACCAGAGCGAGAGCGTCGTCGTCCTTGTCGTCGTCGTCGCCGCCCTGCTCCTCCTCCTCGTCGCGCCGTTCCCGCACGCCGCTGCCGTCTGCGGGGCGCTCTACGTCGCCTACTGCCTCCTCCTCGACCGCGCAGCGAAGGCGAGCAGCTCCAGCTCGTCGTGTCCTTCCACTGACACTGCCGCGCCGCCGGCGGCAGACGCCTCTCGCCCCACTACTCGGGGCACGGTGGCAGGCTATATGATCGTGCAGAAGCAGAATTGA
>Zm00001d016949
TTAGTTCGAATTTGTTATAGGAAAGCGTTGAGAATAGTCCATCTAGAAGCTTAGAGTCCAAGATGATTTGTCGAGGAGGGTTACCTTCGACGGGGTCAGCAATTCAGCATTCACCCCTTGATAAACCGTTTTATACGCATAGAGGTCTTCGTCGTGTTCGTCCTGCCCAACTGCCCGCTGAAAAACAAACTCACCAACAAAGTGACCTGAAACTGGGAGCAAGCAACCGAGGGCGAGAGCCATGGCGAAGCCTCGCAGCGGCGGCGGCGGCGGCCTCCTGGACTTAGAGGGGCACTACGCCTTTTACGGCGCCTACCACAGCAACCCCGTCAACGTGGGCATCCACGAGCTCTTCGTGTGGCCCATCTTCCTCACCGCGCTCATGCTCCTCCACCTCAC…
>Zm00001d016963
CCCTGCCTCCCCATGTTCGCATGGTCACGCCCACGGCCGCACCAACCACCAGCCCCGATTTCCTCCTCAATCACACCCCCAAACCAAAACCCAAACAGCACTTCTCCTGCAATCGCCGACGTCGACGGAGGCTTCGCCGGCCGGAGCAGCGCCGACGGTTGTTTTGCCCCTCCCTCGTCCGGCCCAGCAGCCCAGGCGAGCATGCCTTCGATTGCGCCACCGTCTTCCTCCGTCGCTGCCCTCACCCGCCAACCGGTGCAATTCTTCAAAGGGTGCAGTGTATCCAAGGAGACAAAGGGACCGGTCCGCAGTTTCTTCACTGCAAATTCAAAGAGCACCACGGTGAAATCAGCGGACTTGAAAGTAGCATCATCCTTCAAAAATGATGGTGGTTATCCA…
>Zm00001d017130
GAGAAGACGAGGGGGCGTCCCCGTCCAGAAGAAGGGGGCCAGTATGACGTGTCTATCTAGTTAGTTCTCGATAGCCTCTCTCTCCCTGCCTCCCCGCTGTTGTGGTTGCGGTGCTTCTGCTGATCTGCTCCGTCTTCTCCTCCCGGCAATGGCCTGCTTGGAGGCGCCCCCGCGCGTCGAGCTCTGCCCGGTCTCGTGCCAGCCCCGCGGCCTGCAGCTTCCGCCATGGCGGCTCAGCCTGTCGAGGTCCTCCTCTTCATGCAGCGCACGGAACTCCTCTGTGATGCAGATGCTGATGATTTATGGGTGGCTGCGCCTCATAGCCCTGCATCTGTTCGCTCAAGGTTGCTTGCAGCGGAAAGAGAGGAAGCAAAGGCTGTCCTGTCCCTGTTTCTGAGG…
>Zm00001d017187
ATCCATTCCCAATTTTTCATCCATCCATCCGAAGGCTAGAGTTATCTCGTACCTCGCCCGCTGCTGCCTGCTCTGCTCCCCGAAGGCCGAATCCGATAGCCAGCGCCAACAAAACCCCTCTCCGCGCCCGCTCCCCACCGGTGACAGCGCGCCCATGGCTGCCTTACTCCGAACGGCCGCGGCCCTCGTGCCCCCGCCCTCGTCGCCCCTGTCCGCACGGGAGCCGCGTGGGCGGTGCCTGCGGCTAGCCTGCTCCCGGCGCGCGCCGGTCCGACAGCTTCGGGCGTGGCCACTGCCGACTCCGCACGTCTTCGGTCGCTCTGGGGGCCGGTTCCGGCGCCTGAGCGTCACCGAGGCCGAGGAGGCCGCGCAGACGGCGGCGCAGGAGGATCCAGAAAC…
>Zm00001d017199
AAAGCATTGAAGCAAAGAACCCTGCAACTGCAACAAGCCCTGACGCTTAATACATCGGCCGGCACTCGATCGGCAGCAGATCAAAGATGGCGGCGGAGGAGGGGGAGAAGGCGAAGAGCGGCGGCGGCGGGCAGCAGATGACGGTGGTGCGGGGGCTGGACGTGGCGCGGTACATGGGGCGGTGGTACGAGATCGCGTCGTTCCCGTCCTTCTTCCAGCCGCGGGACGGCCGCGACACGCGCGCCACCTACCGGCTGCTGGAGGACGGCGCCACGGTGCACGTGCTCAACGAGACGTGGAGCAAGGGCAAGCGCGACTACATCGAGGGCACGGCCTACAAGGCCGACCCCGGCAGCGACGAGGCCAAGCTCAAGGTCAAGTTCTACCTCCCGCCCTTCC…
>Zm00001d017208
ATGAACTCAAAGAAATTGTCAGCCATGGTGTTAGCTGGTGTGGATTCTCACCGTTATGCTACATCTTCAGCATTTGCAAAGTATAATCCTGTCAAGAACATCAAGCCACTACTGTCATCCCCAAAGTTGAAACCAAGAACTAAAGTTGGTTGCCAAGCATCCTTGTCGTCATTCAGCTACCCTGAGTTATCTTTCAAACCGAAATGGTGGTGGAGGACCCTAGCATGTGTACCTTATCTTCTGCCACTGCACAACATGTGGGGGCATGCAGATGCTATCTATCAGCTTCATCCATACTTGCAAAGATTTAGCCTGCCTTACGCTTTCATCGATACAATGGCTCTGCTCCCTGGGTGGCTTTTCCTGGCGATCTTCATGACTATATACTTCTTTGTTGTG…
>Zm00001d017249
ATGGCGACGTGCGCTACGACCCTCGCACCTCTTCTGGGCCCGGCGGCAAACGCGACGGAGTACCTTTGCAACCAATTCGCGGACACCACGTCGGCGGTGGACTCGACGTACCTGCTCTTCTCGGCCTACCTCGTCTTCGCCATGCAGCTCGGGTTCGCCATGCTCTGCGCGGGCTCCGTCCGCGCCAAGAACACCATGAACATCATGCTCACCAACGTGCTCGACGCCGCCGCCGGCGCGCTCTTCTACTACCTATTCGGCTTCGCCTTCGCGTACGGGACCCCGTCCAACGGCTTCATCGGCAAGCACTTCTTCGGCCTCAAGCGGCTTCCCCAGGTCGGGTTCGACTACGACTTCTTCCTCTTCCAGTGGGCTTTCGCCATCGCCGCCGCCGGGATC…
>Zm00001d017290
ATGCCGCCGGAGGCCGCCTCGTCAACAGGCCACATCGTCGCCCGCATCCGGCGTCCGCTGCCCGCGGAGCGGCCGCACGTGAGGCGATGCACCAGGCTGCTGTGCTCGGCGTTCCTCACCGTGCTCCTCGTCGCCGGTGTGGTCCTCTTTGTCGTGTACCTCGCTGTCCGCCCGCATCGGCCGCGGTTCCACGTGACGGCATTCTCCGCGTCGGGCATCGGCCCGTCGTCCGGCGGGACCGTGTCGCTGTCGGGGCAGCTCTCCATCCGCAACCCGAACCGGGACATCGCCTTCTTCTACGACCGGTTCTACCTCTCGGTGGAGTACCGCGGCGCCGACGTGGTGAAGGGCCAGGCCCTGACGGCCGCGCCGCTGTACCAGCCACCCAAGACGACGTCG…
>Zm00001d017380
ACCTTACTCTGTCGGTTACACCTCTGCCTCTCCCTCTCCCCTTGCCGGCCGGTTTTCTCCGTCCGTGCCCATGGCCATGGCCATGGCAGAGTGGTGGGCTGCGGCGACGGAGGCCGTCGCGGTGTACACTGGGTTGACTCCTACGGCGTTCTTCACGGCCGTGGCTGTGGCCGCGGCGCTGTACGTCGCGGTTTCAGGACTGTTTGCGCGGCCGGCGCAGACGTCATCGAGGAGGCAGGAGGAGGCGGCGGAGGAGAGGACCTTCGAACCACTGCCGCCGCCGGTGCAGCTCGGCGAGGTGACAGAGGAGGAGCTCCGAGCTTACGATGGGTCCGACCCCAAGAAACCGCTGCTCATGGCCATCAAGGGCCAAATCTACGACGTCACGCAGAGCAGGAT…
>Zm00001d017416
AGATGCGGTTCAACTAGCCCTCCGACCCCCCTCTCGAGAGTTCCGCTCCACCGCGGCGAAGGAAGTGGCGGAGGAGGAGGAGGATCCGCGCCTGCGCTGGGCCTTCGTGCGGAAGGTGTACGCGGCCCCCCGCTGCCGTCTGGCCCACGTACATCGCCATCCTCCTGTCCCTGTCCCCGCTCGGACTCTTCCTCGCTGCCGCCGTGTCGGCAGATCTGGCCGGGTAGCCCGGTAGGAAGCGTCGTGGGAGGAGACAGGCGAGGCGTTCGACCGCCGCCGGCAGCTTAGGACGTACCGCGTCTCTGTTCTATGGGTTCACGAGTTTCGGGGCCCTACATGGATTCTTCGCCTCCGCCTCCGCCTCGTCCGCCATCGCCGCCGCGACACCCTCCTCACCCT…
>Zm00001d017418
ACAGCCCAGGCTCGAGACTACAACGTTACAGCACAACACACTGCTGCACGTACATACGCAGATAGAGACCAGCAGCAAGCTCGATCGAGACTCGAGAGGCATGGGGAGTGTACCGGAGGAGAAGGCCAAGCTGGGCTTCGGCGGCCTGGTGGGCGACCTGAGGGAGGTGTACGAGAGCGGCAGGACGCAGGGCCTGGAGTGGCGGCAGTCGCAGCTCAGGGGCCTCGTCAGGCTCCTGGAGGAGAAGGAGGAGGAGATCTTCGACGTGCTCCACGAGGACCTGGGGAAGCACCGCGGCGAGGCCTTCAGAGACGAGGCTCACACGCCGCTCGTTGCCTTCCCGGCGACCGCGCTGGTGGTGCCAGAGCCGCTCGGGGTCGTGCTCGTCTTCTCATGCTG…
>Zm00001d017461
GCAACACACAGCTCATGCAGCTGTACACTTGACGCTCAGCAAAGCAGCAGAGAGTACGCGGATGGATTTGGGATACGCGTAACCTCCATCTGAATACGTCCGATGCGATGCTCCTCCCTTTTCCCACCACCTCCCGTCTTCGCTGATCCCGTCAATCGCCTTTCTCCTCTTCCACGTCCTCCTTTCTACCCTCTTCGGGGCGTGTTCATAGCAAACGCGCCATCAAGATGATCGACGCCGATAATAAGTACGTATCACTCCCTCGAATGCTACTAAACCCTCCTAAACCAGCTCGGCGCGCAGGCAACTTCTCTATCTCCACTGCTCGCCTCGCAATCCAGCTCCAGCCGCGACCCTCCCTACCTACATACGCTAGGTCGTCGCTAGCTACCTAGCTTG…
>Zm00001d017462
ATGGACAGCATCCGGCATCACCTCCTGGACGAGCCGGCGGCGGCGGCGACCGCGAGCGCGGCTCCGCGGCCGGTGTACTGCCGCAGCACGAGCTTCGGCAGCCTAGTGGCGGACCAATGGAGCGAGTCGCTCCCGTTCCGCCCCGACGACGCCGACGACATGGTCGTCTTCGGCGCGCTCCGCGACGCCTTTTCCCAGGGCTGGCTCCCCGACGGCTCCTTCGCCGCCGTGAAGCCCGAGCCCCTGGCGTTCCCGGACTCCCCCTACGAGCGCGGATCCTATCCCTGCCTTGGTGGCTTCCTTCTCGCGGAGGGGCCTGAGACGCCGACCGAGGCGGCGACGACGCCCGGGAGCGAGGAGGAGGCCGCGGCGGCGGTGTCCAGGGGGAAGCACTACCGC…
>Zm00001d017477
ATGGAAGCTGACGCACTACTCCATGCGCCCATGACTTCCTCTTCCTCCTCTTCTTCCTCCTCCTCCGACTCCGTCGGCGGCTCGTGCGTCGTCAATGGCGCGCAGGAGCTACCGTCCAATACCGGCAAGCCGCACAAGAACGTGAAACGGAAGAGAACCGCGTCCCCGTCCGCTGCTCCAGGTGGCGGCGTGGCGCCGGCGCCGCCCGAGGCCGCCATAGCGGACGACGACTGCGGCGGCCGGCGGCGCAAGAGGGGGAGCGCCGGCACCAGGCACCCGACGTTCCGCGGCGTGCGCATGCGCGTCTGGGGCAAGTGGGTGTCCGAGATCAGGGAGCCGCGCAAGAAGTCGCGCATCTGGCTCGGCACGTTCCCGACCGCCGAGATGGCCGCGCGCGCC…
>Zm00001d017598
ATCATCACACTCGAAACCCAACAGCTTCCTTCCTGGCGATCCAATTAACGGCTTCTCTTCTGAGCTCAGCACGAACAATGGCCACCATCCTCACCGTCGCAAGCTTCTTCGCACTTGTGTGCATCTCTCAACAAGCGCGGGCTGCGAACTACACGTTCATGAAGGACGCGGTGCACGCGCCGCGGACGGGCTTCTACGACTACATCATAGTCGGCGGCGGCACGGCGGGCTGCCCGCTGGCGGCCACCCTGTCGGCCCGCGCGCGGGTGCTGCTGCTGGAGCGCGGGGGCTCTCCGTACGAGGACGCGCGCGTCCTGAACATGGCCCACTTCTCGGACGTGCTGGCGGACACGTCGGCGTCGTCCCCGTCGCAGCGGTTCGTGTCGGAGGACGGCGTGA…
>Zm00001d017653
ATGGACGCCCTCCCGCCGCCCGCCGCCGTCCACCCGTTCGCGGCTACGCTCCCGCCCTCATTGTCGCCGCCGTCCTCGTCGTCGTCCCTCAACCTCTCCCCCTCGCTGCTCATCATCGCCGCGCTGCTCGCGTTCGTCTTCTTCGCCTCCGTGTCGATCCACTTCCTCCTCCGCTGCCTCGCCCGCTCGTCGGCGTCGTCGTCGTCGCATCGGGGCCCAAGCCCGCTGCCAACCAGGGCCCGCCGCGCGTCGGAGGAGGAGGCGGAGGCGGAGGAGGTGGTAGGGTCCACGAGGAGGAGCGCCGCGGCGGTGGGGCCGGAAGAGGCGCATGCTGCGGAGGTGGACGACGAGAAGGAGCGCCTGATCGCATCTCTGCCGCTGTTCACGATGGCGTCGGCG…
>Zm00001d017684
ATGAAGGCAGCGGTGGCCGCGGTCGTCGTCGGCGGCGGAGGAGGCGACGAATGGAGGTGCCGGAAGCACCCTGCCGCGAGATCCGGCGGCGGGGTGTGCCCCCACTGCCTCCGGGACCGCCTCCTCCGGCTCTGCCCCAACTGCGCGCACGTGCGGCCCTGCGCCTGCGCCGCGGCGTGCGCCTCGCCGTCCTCCTCCTCCTCGGCCTCCGGCGACGCGGTCGGCCGCGTCCACAGCCTCATCGAGCGGGAGCACCGGATCGCGCGCTCCAGGTCCGTGGCCACGGGCTCCTCCGCCGCGCTCGCCGCCCCCTCGGCGGCGACCGCGTCCGGGGGCGGCAGGCGGAAGGCGCGGGTCTGGGGGTGGCCGCCGTTCTGGAAGCCCGCGGCGCGGGAGGGG…
>Zm00001d017713
ACCACTCCAGCGCATCAGACACAGACACACCAGAGCAGGGACTCAGCGAGCCCGAACCGAGCAAATCGCCAACGCGAGGAGAAGCGCACGCCTATCTGCCGCCCCGCTCCTTTTCCCCGGTTCGAGGATCACGTCGCGCCTCGGTCGCAGCACGCACCCGCAGCAAGGTCGGCGGCAATGGACGCTGGGGACGCCATGGAGAGGGGCGACCGCACGCCGCTGCTGCCAGAGAGTCACGGGCCAAAGGTTCAGGACGACGGCGGCCTGCAAGTGCCGCTGCTGAAGGATAAAAAACGTGCCGGCAGCAAGGCGCCGGCGGTTGTTCTCGGATTCGAGTGCCTGGAGAGCACAGCGTTCAATGGCATCTCGACCAACCTGGTGGTGTACCTGGAGACCGTC…
>Zm00001d017720
GGCAGCACAGAGCCCTTGGGCTTAGGTAAACGAAAAATTGCTATTTTGTCACTCCTAGTTTAGACTCTATTCTATTATGTTATCTAGTATTCATCACGTGTGAGACCATATGTATTTATGATTTATGAGTGTGATAGTAAACTAAATAAGCTCACAACTAAGGCTGACAAAATAGCAAAATAGCTCTCGATAAACCCCCCAACCCCATCCCCCAACTCCGCACGCATCCGACTTGAAAGTTGAAACCCTAGTGCAGGCACACGACCTCCGTGTGCAACGCGTCGCCGCCATGGCGGCCCCCCTGCACTCCAGCTCCGGCCACAACGCCGCCGCAGGCGGCGGGGCCAAGACCATCGAGGAGATGTACCAGAAGAAAACGCAGCTGGAGCACATCCTGCT…
>Zm00001d017751
CAAGCCTGAAGGTACTGGGCACTGGCTACTGCAGTCTGTAGCTGTGCGGAAAGATTAGGCTGCTCCGTGCAGCGCTGACCGTTGAGCAGAAAAAGGTGCTGCCCAGTAGATTCGTTCATGGCCACCGCCCCTCCCTGCGCCTGCGGCGCTCCGTCCCCATCGCTGCGATGCCCTCTAGCCCTGCCGCTCCCCTTCGCTACCTCTCATCCCGCCGTCCGGCTCGCCGCCCCGCCGCTTCTCGCGCGCCGCCTCGCCGTGTCTCCTCGAAGGGCAGCGTCAGCGCTGGAAGCCCTCGTGCTGGAATCTGACGACGAGGAAGAGGAGTCCGGGATAGGCCTGTTCCAGGGTGAGGAGTGGGCAGCGACCGCCGACGAGAGGGACGCGGTAAGGTCCCCCGAG…
>Zm00001d017755
GTGGTTTGTCATTGCAAGGTGCAAGCAAACTTGAAAAAAAAAACACACGTCCTGCTCCGTCCGAATCGCTACTCCGCCGCGCTTCTCATCACCGTCAAGAGATAGTCAGACAGTTCCAGCCCCCTTTCCACACGCACACTCCTCTCCCTTCCTCTCCTCCGCTTCCATCCCTGGGCTGTGCGCTACTACTCCCCCTGCTGGCCGCTGCTCTGCTCTCACGCATGTTTTCACATCCAAGCGCCTGCCCCTCGCCCTCGCCGCCACAGTGGTAACCCGATCCATGCCGGGCGGCGGCCGCTGACTTGCTGCTGTTGGCTTCAACGGCCGCAGGCAAAGGTCGTCATCGCTTTCCGGCAGCCCGTTTCATTGGGAAAGCGACGACGAGGCGAGGCGAGGCGA…
>Zm00001d018096
AAAGTTGAAAGGATGAAGTTAGAGGATCTCGTTCCACTGAGCTAGCGAGACGGCAGCGCTGCGGAACAACAATGGCGATGATGCCTCCTGCAGCGGCGTCATCCCTCGCCTCCACTCCCCGCGGCATCGCCGCTCCGCCTACTCGCACGGCATCCCTGTGCATCCGCTTAGGTGTCGTGACGGCGACGCTGTTCGCTGGACTGGCGGCGGCGTCGCAGCCAGTGGAGCGTCACGCCGCGGTGGTGGTCGCGATGGCGAAGAGGGAGCAGGAGCTGGAGGGGATCCGGGCCATGACGACGGAACAGCTGGAGGAGGAGGTGGTAGACCTCAAGGGGGAGCTTTTCCTGCTCCGCCTTAAGCGCTCGGCGCGCCAGGAGTTCAAGAACAGCGAGTTCGGCC…
>Zm00001d018181
ATGGGGGGCGAGACGCACCTGAGCGTGCAGGAGCTGGCGGCGTCGCTGGGCGCGCTACCGCCGGAGTTCGTGCGGTCTGAGCAGGACCAGCCGGGCGCGACCACGTACCGCGGGGCCGCCGTGCCGGACGCGCCGGTGATCGACATGTCGGAGCCCGGGTTCGGCGCGCGCATGGCCGCAGCCGCCAGGGAGTGGGGGCTGTTCCAGGTGGTGAACCACGGCGTGCCCTCAGCGGCGGTGGCGGAGCTCCAGCGCGTCGGGCGGGCCTTCTTCGCGCTTCCGACGGAGGAGAAGGAGCGCTACGCCATGGACCCGGCGTCCGGCAAGATCGAGGGCTACGGCACCAAGCTGCAGAGGGACCTCGAGGGCAAGAAGACGTGGAACGACTTCTTCTTCCAC…
>Zm00001d018190
ATGTCGGCGACGACGGCGCCCGTGCGCCACCGGACGTGCCGCATGTACTGGTGCTACCAGTGCGGCCGCGCGCTCCGCATCATCTCCTACCCGTCCACCGACGTCTTCTGCCCGCGCTGCTTCGGCCGCTTCCTCCACGAGATCGACCTGCCGGCGCGCCCCGCGTTCCCGCCGCCGCACTTTCTGCCGCACCCGTTCCACCCGCAGCGCCAGCACGACGGCCACCCGCGCCGCTGGGTCATATACGGCGGGGAGCCGGCGACGACGGTACCAGGCCGCGCGTTCCGCCAGCCTGCTGCGCCGGCGCAGGGACCTGCCACGCATCCTGCTCCTGCGCCGGCGCCGGTTCGACGGCGCGTGCCCTCCCCGCCGCCGCCGCCGCCGGTACTGCGGCGGCCG…
>Zm00001d018220
AGTTGAGGAGTTGAGTTCCGCTCCGCCACACCAAAAAGAAACAAAAGCCTACGGCGATCGATCGAGAAGCTGGTCATCGTCAGGATGTCATCGCCGCAGTCAGCAGCGCCGCCCGTGAAGCTGATCACGGCGTTCGGCAGCCCGTTCGCCCACCGCGTGGAGGTGGCGCTCGCTCTCAAGGGGGTGCCGTACGAGCTGGTCGTGGAGGACCTAGCCAACAAGAGCGAGCTGCTGCTCACGCACAACCCAGTCCACCAGTCGGTCCCTGTCCTCCTCCACGGTGACCGCGCTGTCTGCGAGTCCCTCGTCATCGTCGAGTACGTCGACGAGACCTTCCACCATGGCGCGGCGCCGGGGATCCTCCCGGCCGACCCCTACGACCGCGCCACCGCCCGCTTC…
>Zm00001d018332
ATGGGCTACTGCTCCTCCTACACGTCGTCCTCTCGCCCCGTCGTCCCCTCCTCCTCCCTCCGACGCCTCGGCCTCGTTCTGGCGGCCGCGCTGCTGGTCTGGTGCCAGCGGGTGGCCACGGCGCAGCAGCCGGTGCCGGTGCCGGTGCGCGTGGGCGTCATCCTCAACCTGACGCCGTCGTCGCCGGTCGGGCAGCGGCGGAAGCTCGGCATTGAGATGGCGGTGGAGGACTACTACGCCGCGCGCCCCGGATCCCGGACCAGGGTCGCGCTGCGCTTCCGGGACTCCGCCGGGGACGTCGTCGCCGCCACTTCCGCCGCGGTGGACCTGATCAAGAACGAGCAGGTGCAGGCCATCATCGGCCCGCAGACGTCGGCGGAGGCCGACTTCGTGGCCTAC…
>Zm00001d018491
ATGGGCAAGAAGAGCGGCCGCAGCGGCGCCGACGCGCCCAAGGCGACGGCGTTCGTGCTGAAGGTGGCGATGCACTGCCGCTGCGACGGCTGCGTCCCCAAGATCCGCGCCGCGGTCAACAAACTGACGCTCCGGTGCGAGGGCATCCAGTCGCTGGACCAGTCGGCGCTGGACACCAAGGGCGAACTGGCGCTGGTGGCCACGGCGGACCCGGAGAGGCTGCGCCGCCGCCTGCGCGAGGCCACGGGGAAGAGCGTCGACATCGTCTTCCCCAAGCCCGCAGCGGCCAACGGCGGCAGCAGCGGCAGGGAGGAGGCGAACGCCGCCGTCCAGGCTCAGGCTCAGGCCCAGGCCCAGGCGCTGCTGCTCGCCGCCGGTCTGCAACAGCAGCAGCAGCAC…
>Zm00001d018497
AGGTCCCCCGCTCGCCGCCGACTACCCTGATCCGGCCGCCGCTCGTTTCCTGATCCGGCCTCCCGGCACCCCCGTTGCAGGTAGGGGACATGGCGGAGGAGGCGTCGCCGTCGCCGTCGCCGCCCAAGTTGCTCTACATTGCCATCGCCGACGGCGGGGTCCGCCGGGCGTTCCGGTACACGCGCCCCGTGCTGCAGAGCACCCTGCATCTCATGGGATGCAAGCCTCGCCATGCCTTCAAGATTAGCAAGAGAGTATTCAATGTGATGAAGAGTGAATTCTTGGCCACATCAAAGTCAGATGGGGCAACCAAACAAGAAAATTATCCTGCCTTTGGCCTTGGAGATGGTACAGATACTCCAAAAATGTTGGAGAGAAGCAATAGCAGCGTACCATTTG…
>Novel01296
CAACCGCGCTGGACGAGGTTTCATCTGCGCTTCGCCGGCGGCAACCGCGCTGGACGAGGTAGCGCTGCTATCAAAGTATCAAACACCTTGTGCTGTCAACATTTATGAGTGCAAGGCAGTATTGCTAAGAGTATCTTGCCATGGCATCTCCTGCTTCCGTCACCAACCTCGGAAGCAATGGGAGGTCTGGCCCGCTCCCGGCTGCAGCTGCAAGGAGGGCGCAGTTGGTCACAAGGATCAGATTCACGGGGTTCGATGGCATAAGGCGATGGCAGTATGAGCCTGGGAGGCTTTGCAGGTGTATGGTCGTCACTAATCTGATTGAGGAGAAGGTTGTTCAGTTCTCGTCAAGAGGGAGTGTCAGTGTGAAAGCTGATGATGACAATGATCTGCTTCTGA…
>Novel01309
CAAAGGGACCTTGGATGAGTCAGATCGTTTCCTTACAAGTCCATCTGAGTTTGTCGGCGATGTTTTTGGAAATTTATCTGCATTCAGTCACATTGTATTATTCGAGTCAGAAGAAAGACATGTTCTCCAGTTGCTTCTGCACAATTCCTTTCTTGAGATGAGGAGATTTTTCCACTCACATTTCAAGGTTGACAGAGACCTTCAGTCGGCTGTTGTGGTTTATTCACGGAGGGATGTGCTATGATTTAGTACTGATGTGGCAGAAAAATGCCTGTTAGCTCGTGTAACAATCCCCGCATGTTTAATGTTGTTTCAGCTTTTCATTTGAGAAATGAGTTGTGGCATTGCTGGATACTTGTGATATCTTAATCCTCTTGGAATGAG
>Novel01317
CTGGCATACAATAGTCTAAAGGGCTTAATACTCAGCAATGCCTTAAGGGCACAGAAGAATGCCGAAGATGAGAGCTGCACCATTGCTCTTAACAACCTTCGAACAGAGGTCATCAGGCTAAGAAATGAAGCCTTGGAGAAGGACAAAATTCTGCTTACGTTGGTGGAAAAAGTGAAGGAAGACGAAGCTAACTCTAAAACTCAAGCCGAAGCTCAGAAGCGCGAAATCGAAGATCTTCGGAAACAACTAGCCCGAGCTAAAGAAGAACGCATTCTTGAAGAAACAAAGAGAGAACTAAGCGATCAATGGGCAAATCATTTGGAAATAAATGTCGAAGAGCTTCGTGCTTCGAAGAAAAGGTATTATGATAAATCCATAGAGTGTGTTAAAAAGATAAAA…
>Novel01367
CTCCTTTCGATTCAGCCGCCGCAGCCCTCAGCCACCGCCGTCGCCGTCGCCACCTGCCTCGCCCACCGCCTCTGAGGAAGAAGACATGGATTCGAGGGTTGGCCGCTGAGGAAGAAGACGCTACTCCCTGTCTCGCCTCCTCTTCTAGATCCAGCCGCCGCCGCCGCCTCACCCACGGATCTGAGGAAGAAGACGCAGATCTGTTTCGTGGAGTGTTTGTTCCTTTTGGAAGAAGTTGCTACTATCGTACAACTGAAGCTCACCAAGGTCTACCGGAGGTTTCTGCTGCTATTTTGTTTGAATTTTTCGAAAAGCCAATAGCAACAAGTATCTCATTGTGTGTTGAGGACAGAGA
>Zm00001d035081
GTGGACACCACACGCCAGTCCGTCCGTCTCCGCCAGTCGATGGCACGCACGGCACGATATCCAAACCGGCCGCGGATAGCTGTGGCCGCCGTGCCACCTGCTGCTGCAGAGGCTCTCTCTCTCTTTCTCTCCAGCTTCGCGCCGCTGCCGCGACCTACCATGGAGCTCTGCCTCGCCGCGCGCGCCGGGACGACGGCGGCCGCGTGCCGGAGGAGGGCACCGACGACTACAGGCGTGCCGAAGAAGAAGAGGCACGGCGGCGGCACCGTGCGCGTACGGTGCGCGGCGACGGCGCCCATGGGGGAGAAGACGGAGTACCGGGACGGCCCGCTGGAGCGCGCGTTCATGGGGCTGTTCGCGCGCAAGATGGAGAAGTACGCGGCGAAGAAGCCGGCGGCG…
>Zm00001d035246
ACCCACACCTACACCTACACATTACAGCCAGTACTGCTGTCACCTCACTTAGCAAAGCTAATACGTATGTCATAGCAGCTTGCCACCATGGCGAGCATCACCGTGACAAGGAAATCCCAATCCTTCGTCGTGCCATCGTCCACGCCAACTCCGACGACCGAGACGCTCGAGTTGTCGCCCATCGACCGCGTTCCAGGCCTGCGCCACACGGTGCGATCCCTGCACGTGTTCCGCCGCAAGGACGCCGCCGCCTCCGCCGCCCACTACGATGCTGCTGCCGCCGGCAGGCCGGCCGAGGTGATCCGCGCGGCGCTGTCCCGCGCGCTGGTGGACTACCGCCCGTTCGCCGGCCGTTTCGTCGGCTCACTGTACGCCGGGGAGGCGAGCGTTGAGTGCACC…
>Zm00001d035306
ATGTTCGGCGGCGACGATGGCGCTAGGGTGCTGCGGCGAGCCGGCAGTTTCCCACGGGCACCGCCCCCGCCGGCGACGGCGAGGCACATCCTCTCCAGGAGCGAGTCAATCAAGAAGAAGAGCGGAGCCGCGAAGCGGGCACGCGTGCGCGCGGGGCTCGCCGCCGCGCTGCAGGAGCTCAGGCTCGCCGGCCGGAAGCACGGGGCCAGAAGCCGGGGAGGCGGGGCGTTGTCAGAAGCTGTCAGCGCCGGCGCCGGAGCCGGAGCCGCCGCGGGGCCGCGGGCTAGCGATGACGTCCAAGGAGGAGGCTGCTGCGCCGCTGCTCCCCTGCACGTGTCCGACGTTGCCGAGGCGCAGGCGAGCAGAGGAGCAGCAGCCACCGCTGGTCGTCGTCGCGTG…
>Zm00001d035321
ACACTACCTACCGTTGTCTCCCACGTCGAAAGGCGGATAAGGTTTTCAAACGCACGCGATTGCGGAGATCTCGGCCGCCCGATCCGCCACTCCTCCATCCGACGGCAGGTACGTCCCCGGCCGGCCTACTACCCGGCGACCTCGGTCGCCCATGGCCACCGCGAAACCTTATCCCCAGAACCACACGGATAAACCCTAGCTGCGCGAGCCCCCCGGCGATGTCGGTGGCCATCCGCTCCGGCGAGCTCCTTGCGTGCCCCGTCGCACTCCGGCGGGCGCCCTTGGCTGTGTCTGTGGTGTCGGTGCGGATGAGGGCTAGGGGCGCCGTGGCTGTGCGGGCGGAGGCAACGGCCGAGGGGGTAGGGAAAGAGGGGAAGAAGGCGGCGGGGAAGAAGAAGC…
>Zm00001d035377
AGCGAGACGAACGCGATTGGGAATGTGAATGTGATGCTCCACCTCCACTACCACTCTATCGCCCATATCGTCCGTGGTCCGTCTCGCGCCGAGCATTCGCATTGGCAACCAAACCAAGCTGCTTGCATTGTTGCCCGTCCCTTCGTTGTTCAGAGATCGAACATCCAAGTCGTTAGGAAATGGAGGCGGCGGCGGCGGGGAGCGGCGGGAGTGGTGCGGCGACCAAGCTGCAGAAGGTGTACCGCAGCTACCGGACCAGGCGGAGGCTCGCCGACTCCGCCGTCGTCGTCGAGGAGCTCTGGTGGCAAGCACTGGACTTCGCAAGACTTAACTACAACACTATCTCCTTCTTTGACGAACCCAAGCCTAAGGCTGCTGCCTCACATTGGAATCGTATTG…
>Zm00001d035428
ACTGCTTAACTTGTCGATCTAATTGTTATGTTACTTCTTGCTTCCTCCTCACTACCCGATACTACCGCATCAAACTCCAGGTCCTCAAAACAAGAAACTCCACCAGAGCTGTGCTTCAGATAAGATCCAAAGACCCTTGGTTCCCTCCGTCGATTTTCAGTCTTCTTGAGCCAATCAAGGTAGGCGGATCATCTCCTCCTGTCGCTGTTAACTGCCATATTTGGAAAGCAGGTCAAGATGACCCTAGAGAAAGTCAGAGTAAGCATTGCCACAAACCCCCATATACTTCTGATAGACAGCGCACACACATTTACATTAAATGGGAAAGCAGTGGTGCGTGTTGAAGCACCCTCATCTATGAAGAACCATGCCCCCATTGACCTAGTCACGCTTATCAAT…
>Zm00001d035494
ATGGGCACGGGCACGGGCGCGGGCGCGGCGCCGGACCGGGCCAAGCAGCGGCGGGCTAGCGCCGGCGGCCACCTGTGGAAGAAGGCGCTGCTCCACTTCTCCCTCTGTTTCGTCATGGGATTCTTCACGGGCTTCGCGCCCTCCTCGCCCTCCTCCTCCTGGAAGGCCGCCACCACCCACCCGCCGCACCGCCTCGCAGCGTCCCGCGTCGCCGTCGACGTCGACGTCGACGCGCGCACCAGCCTGGTACCACCCGCCGACGCGCTCTCCTCCTCCTCCTCCGTCGCCACGGTGGACGCGGGCGACGACGCCGCCGAGGGCGGCCAGCGCCGCCTCCTCATCGTGGTCACCACCACGCGGCACCTCGCCTTCAGGCCCGAGGGCAACCTCACCGCCGCC…
>Zm00001d035629
ATCACCTTCGCTACCATTGCTTCACCATCACCACCACCCCGCGGCTGCAGCTCAGCAGCTCCAGACCTCACCAGAGGCACCTACCACACCGCCCGCCGCCGATCCCGTCACCCGTCTCCTCCCCGCTGCGGAGCGTCTCCAGCCCTGCCCGGTGCCCGCCCAGATGGCAAACGCGGCGTCAGGGATGGCCGTGGACGACGACTGCAAGCGCCGGTTCCTGGAGCTCAAGGCCAAGAGGACGCACCGCTTCATCATCTACAGGATCGACGAGAAGAAGAAGATGGTGGTGGTGGAGCAGGTGGGCAAGCCCGTGCTCGGCTACGACGACTTCGCCGCCAGCCTCCCCGCCAACGAGTGCAGGTACGCCATCTTCGACTACGACTTCGTCACCGAGGAGAA…
>Zm00001d035659
ACCCTGCCATCCTCTCATCACAAGCAAAAGCAACAAGGCAGCAGCACAAGCAAGAACCACACCTCCTCCCTTCGCCTGTGATCATGTCGTCTTGCTGCGGCGGCAAGTGCGGGTGCGGCTCCAGCTGCTCCTGCGGCAGCGGATGCAACGGCTGCGGTATGTACCCTGACGTGGAGACCGCCGCCACCAGCAGCGTCAAGACCACGGTCCTCGCCGCGCCGACCACCAAGGCCAGCGCCGGCGGCTTCGAGGCGGCCACCGAGGGCGGCGGCTGCGACTGCAACACCTGCAAGTGCGGCACCAGCTGCGGCTGCTCCTGCTGCAGCTGCAACTGAGCTGGCCCGGCCCGGCGATGGCGCACGAGAGTCGAGAGGAGGAGGACGACGACGAGGCGTATAA…
>Zm00001d035662
ATCCTCATCACAGGCAACAAGGCACCACACCTCTTCTTCTTCTTCCTCCTCCTCCTAGCACAGCTAGCGCCTGCTCCCCTTCGCCTGTGATCATGTCTTGCAGCAGCGGCAAGTGCGACTGTGGCTCCAGCTGCTCCTGCGGCAGCTCATGCAACTGCATGTCCCCTAACGTGGAGACCGCCGCCGCCAGCAGCATCAAGACCACGGTCCTCGCCGCGCCGACCACCAAGGCCAGCGCCGGCGGCTTCGAGGCGGCCACCGAGGGCGGCGGCTGCGACTGCAACACCTGCAACTGCGGCACCAGCTGCGGCTGCTCCTGCTGCAGCTGCAACTGAGCCGGTCAGGCGATGGCGCACGAGAGTCGAGAGGACGACGACGAGTCGTATAAATATAATAGCG…
>Zm00001d035899
ACTCCACTCCATCATCCCGTGCCTCACGAGTCACGAGTCACTCCAGGTCCAGGCTGAGCAGCAATGGCGCCGCGAACGCTCGGCCTCAACGCGGCCCCGCTCCTCCAGATTCTGCGGTCCCTGTGCCTCCTGGCCCTCGCCGCGGCGGCGGCGGTGTCCGGGCGGCGCCACGGGGCCTCCCCGGCGCGCGGCAGCGGGCAGAGCATGTACCTGGCGCCGGCCTGCCGGGCGCACACGGCGTCGGTGGCGGACTTCGGCGGCGTGGGCGACGGCACCACTTCCAACACCGCGGCGTTCCGGTCCGCGGTGGACCACCTGTCGCAGTACTCGGGCGAGGGCGGCGGCGGTGGCATGCTGTACGTGCCCGCGGGCAAGTGGCTGACGGGCCCCTTCAACCTG…
>Zm00001d035916
TCAAGCTGGGGCATTCCCTCCTGGGAAGAAGATCACGGTGGTGTTTGTCATAGGTATGCCATGCCTACTGTACTGTGTTTTTATCGAGCGAATGTATATGATCATATTTTTTGCCTAGGCGGCCCAGGCAGTGGCAAGGGCACCCAGTGCTCCAAGATTGTCAGACACTTTGGATTCACCCACCTGAGCGCTGGCGACCTCCTGCGCCAACAAGTTCAGTCAGATACTGAACACGGTGCCATGATCAAGAACCTGATGCACGAAGGGAAGCTCGTGCCGTCCGACATCATCGTCAGGCTCCTGCTCACGGCCATGCTCCAGAGCGGAAACGACAGGTTCCTCGTCGACGGATTCCCTCGAAACGAGGAGAACCGCCGAGCGTACGAGAGCGTTATTGGC…
>Zm00001d035937
AGGTATGGCTTCGACATTCGGTGCCACTTCTACTGTCGGCCTTATGGCTGCTCCAACAGGGAAGAATGTGCGCCTTCAGAGGAGGGTGAACTTCAGAGTAAGAGCAGCTAAGGAGCTGTACTTCAACAAGGATGGCTCAGCTATCAAGAAGCTCCAGACTGGAGTCAATAAGCTTGCAGACCTAGTCGGAGTTACACTCGGACCAAAGGGAAGGAATGTTGTTTTGGAGAGCAAGTATGGTTCTCCTAAAATTGTTAACGATGGTGTTACAGTTGCCAGAGAGGTTGAGCTGGAGGACCCTGTGGAGAACATTGGTGCTAAATTGGTCAGGCAAGCAGCAGCTAAGACCAATGATCTAGCTGGAGATGGGACAACCACCTCTGTGGTCCTTGCTCAGGG…
>Zm00001d036016
ATGTCATCGTCGCTGCGGTTCCTGCGGCCGAAGAACGACGGCGGCGGCGGAGACGACGGGTGCTTCGACGGCGTCGAGCTGGAGGTGACGGTGCTGTCGGCGGACTCGCTGCGCCTACCGCCGTCCTACTCGCCGCTGCCCCGCCGGCTGCGGCCGTACGTGACCGTGGCGTCGTCGGACGCGCCCGCCGGCTCGGCCTGCAGCACGGCGGTGGCAGTGGGGAGCGGCGGCGGCGGCGGCGAGCACGCGTGGGGCGACACGCTCGTCGTCCCCGTGGGCGCGGGCTTCCTGGAGGGCCGCGCCCACGTCCACGTCTCCGTGCTCTCGGAGCCCGCCTGCCGGCTCGTCGGCGCCACGCCGCTGGGCTGGTGCCGCATCCCCGTGGCCGACGTGCTCGAC…
>Zm00001d036129
CTAGCTTCTCAGATTTCCTCACCCCTCATCTCTCCTCCCGTGCCGTCGCCTTGCATCGTCCTCTTCCTCCGCGTACCGCCGCTACCGCGACCCCCCTGCCTGCTCGCCTCCACGGCCACACGGAGGCCCCCCATGATGCTCTCGGTTCTCACTCCTCTCTATTTCATGTGTTGTCGCCCTGCCCCATGGTCTTCTTCCTCGTGCCAGCACCGGCCCTATGCCCCCTCCTTGCTCACCTCCATGGCCTCGCGGAAGCGGACCTTGCCGCGAGTGGTTCTCAGTTCTGCTCACCTCCTCCTCTCTCCTTTCAGGATATGTGTTGCCACCGCCGGTGTCGCTGGCGCCGGCCGTCCATGCAACCCAGACGCGGGAGGGCAACACGTCGATGCTGGCCGGAGC…
>Zm00001d036175
CGTACGTGCAAGAGACGAGCGTAGTAACAACTGTGAGCAGCTAGCACATGCATGGCGTCGTCGCAGCTGGTCGTCGTGTGCCTGTTTGTAGCGTCGGCGGTGACTGTGACGATGAACGGCGGCGCGCAGGCGCAGGCGCAGCCGATTGTGCCGGCGGTCATCTCGTTCGGCGACTCCACCGTCGACGTCGGCAACAATAACTACCTGCCGGGCGCGGTGTTCAAGGCCGACTACGCGCCGTACGGGCAGGGCTTCGCGCGGCACAAGGCCACCGGCCGATTCTCCGACGGCAAGATCGTCACCGACATCACCGCCGAAACGCTCGGCTTCGAGAGCTACGCGCCGCCGTACCTCAGCCCGCAGGCGTCGGGGAAGAACCTGCTCACCGGCGCCAACTTC…
>Zm00001d036206
TCCACAGGCCGCGTCGTTCCCGCCGGCATCTCATTCGCTCGTCTCCGCCGGTCGACGTTACGCCGCGTCGCCACACGCCCCCCCGGCCGCTCCTATCGCTACCACCTCTCCTCTCCTGAAGCCACCCGGACGCCGGACGCAATGGATTTTTCAACCGCATCTACCTCCTCTCCCCATGGCGCCGCCGCCCGCGCCGCCTGCTGACTGGACCCCTGATCTAAGGCCCGTAGCCAGCGTGCCCGTGCCCATCACCGTTCCGAGCCCGCGGGACCACACTCACCACCACCACCACCTAGTCGATCGTCGGGACACGCCGCGGGGCCGCGCGTGGGAGCCGGAGCGGAACCGGCGCGGAGAGGCGATGGACGGTGCTGCAGTGGTCAAGCTGATGTCCGGCGA…
>Zm00001d036364
ATCTCTATCAGCTCATCTCCACCGGCCGCCCTCCATCTATCGTCGTCGTCGTCGTCGTCGTCGATCCATCCATGGCGGAGCAGCTGGACCTGCCAGGGTTCCGGTTCCACCCCACCGAGGAGGAGCTGCTGGAGTTCTACCTGAAGCAGGTGGCGCACGGGCGGAAGCTCAAGTTCGACATCATCCCCACGGTGCACCTGTACCGCCACGACCCCTGGGAGCTCCCGGGCCTGGCGCGCATCGGCGAGCGCGAGTGGTACTTCTTCGTGCCCCGCGACGGCGGCCGGCCTGCCAAGCAGCACCACCACCAGTCGTCCGGCGCCCGCCCCAGCCGCACCACGGAGCGCGGCTTCTGGAAGGCTACGGGCTCCGACCGCGCCGTGCGCTGCGCCCACGACC…
>Zm00001d036396
ATGGCAGCTGCGACGGCGCCACCGCCGGCGGCGGTTGCCACCACCCTCTCGGGCCTCATGCGCTGCCAGAACATCCGTAGCAGCAGGCCTAGAGCCTTCTACGCGAGGTGCGCCTCCTCCAACGCGAGCGCGGAGGCGGCGGAGAGCCGGAAGGGAGGCCACGGCGGGACGCGCCTGGAGGAAGCCGTGCCCGTCGGCGAGGGGCGCTCGAGGGTAGACGCCTGGATATCGGCGCGTCTCGGCGGCGGGGGCGTTAGCCGCGCGCGCGTGCAGGCCAGCATCCGGGCCGGGCTTGTCGCCGTCAATGGCCGCCCGGTCTCCAAGGTTTCGCATACTGTGAAGGGAGGGGACTTGGTCAGCTGCACGGTGTCAGAGCTACAGCCGCTGAGGGCAGAGGCG…
>Zm00001d036468
ATGAAGAGGGACGGATGGCAGCACGGCGCCGTCCGGGGCAGCCGCAGCAAGGTGCTGAGGACGGCCGCCGGCGACGACAACTCCGACGCCGACGCGGTCGTGGAAACGGCGGCGGCGGCGGCGAGGAAGCCGACGAACGCGTCCCGGAGCACGGGCAAGTGCCGGCGGGCCCGGTGCGCGGGCTGCCACGCGCACCCGGTCTCCAAGGCGCGCGACAAGGCCAAGGGCGCGCGCAAGCTGCGCGCCTGCGACGTCGCGCTCAACCACCGCCTCGTGTCCTGGCGCGTCGTCGACCAGGGCCCCGGGTACAGCGGCGCGTCCGCCTCCTCCCTGCTGGCGTACCTGGCCGGTGGAAGCAGCTGGCACGAGGAGGAGGAGGACGACGACGAGGGCGGAGCG…
>Zm00001d036539
ACCACTCGTGCACCGATTCAAGCAGAGCAATAGCGCATCGCCGAAGCAAAAGTACGTATCGTCTAGCATCAGTAGCATCCCCACATGGCGAAGTCCGCTGCCGCTGCCATTCTGCTCGCCGCCGCCCTGCTCGGCTGCCTTGTCTCGGCGTCGCTCGCCGACCAGGGCACCGCCACCTACTACACCGTCTACACTCCGTCGGCGTGCTACGGGAACCAGGACGAGGGCACGCTGATCGCGGCGGCGAGCGACGCGCTCTGGAACGGCGGCGCCGCGTGCGGCACCATGTACACGGTCACCTGCGTCGGGGGCACCAACGAGACCCCGAACCCCTGCAACCCCGGCGCCTCCGTCACCGTCAAGATCGTCGACCGCTGCCCGTCGCCCGGCTGCCAGGCC…
>Zm00001d036643
CCCACATCGATTCATTGTCACTTGCCAGAAGTCGGGCGGCCATCGATCCCACTCCCACCGCTTACAGCCGGCCCAGTCCTCGTCGGCGCCGGACGGGGCGAAGGTAACCCCCAAGCTTCCAGATTCTCTGTCAACTTCAGTTATGCGTTTTTCTTTTAAGATGAACCTGAAACATTTTAGCTTTAGATCACCGGAGTCATTTTTTTTTTTCATTAGGCGATTGGAGTTCTGGATCTTATCTGTTCTCCATCATGGAACATGACGGCACGAACCTGGCTGTCGCTGAGGCTGTGCGCTCGGTGCAGCTGCTCAAGATTGACGGCTACAGCGCCACCAAAGCCATGGGGCCATCGGAGTTCATCAAATCCAGATGGAACATCGATGGCCACGAGTGGGAGG…
>Zm00001d036650
ATGGCGATGAGTGACACCGGCTCGAGCTTCGCGCAGTGGGCCGCGCTCTACCACCACCACGACCCCGCCGGCGGCCCGGTCCTGCCCGACGACGACGCGGCGGACGCTGGCAACGGCATCGGCAGCGGCACCGCCACCGCCGCGAGCCCGACGTCGGGAGGGTCCAGCGGCGGGAGCCCCACCACCAAGGCAGCGTGGGGGCAGCAGCATCTGCTTCACGGGGTGGAGGGGCCCCGGGTCGCCGGGAAGCCGGCGGCGGCGCGGCGGCGGTCCCGCGCGTCGCGGCGGGCGCCCGTGACGCTGCTCAACACGGACGCCGCCAACTTCCGCGCCATGGTGCAGCAGTTCACGGGCGTCCCCGCGCCCCTCGCCGGCGCGTTCAGGGTCGGGGACGGGGCC…
>Zm00001d037005
ATGGCCATAGCCAGGACCAGGAGCTCAGCGCCGGTGCTCCTCTTGACATTCCTGTGTTTCTACGCCATTATCATCCCTTCCAACGCATCACCGGACGACTTTCCCCAATGCCTGTCGGGCAGCATCCCCAGCCAGCTCGTCTTCGCGCAGAGCTCGCCGTCGTTCACCTCGGTCCTGGTGTCATCCATCAGGAACCCACGGTTCTTCACGCCAGCGACGGTGAGGCCGCTGTGGATCGTGACGCCGACGAACGCGTCCCACGTGCAGGCCGCCGTGGCGTGCGGCCGCCGGCACGGCGTCCGCCTCCGCGTCCGCAGCGGTGGTCACGACTACGAGGGCCTGTCCTACAGGTCCCAGCGCCCGGAGGCGTTCGCCGTGGTGGACCTGTCCAGCCTCCGC…
>Zm00001d037057
ACCCGTTTTGAAGAGAAGCCGATTTTGGAGGAGACGATGATGAGTCCGGCGTCGGAGCGCAGCCTCATCATCCAGAGCGACGACGACGACGACGCCCGATCCGGCCACGACGTGGAGGAGCCGGAGCAGGACTCCGACTCCTCCTCGTCGTCCTCATCCTGCGCCACCCCACGCCGCGGCCCAAGCTCACCCCCCTACATCCAGCAATGGCCGCAGAGTTACAGGCAATCGATCGACATTCTCAGCAGCGTGCAGTCACCCAACCTGAGCTTTCTGGGGACTCCAACTCTGAGCAGGCTGTCGAACTCTTTCCTCGCCATCACCGATTCTTTCCGGAGCAAGGCCCCCGAAACGATCTCTAGCTTTATCAAGCCACTCCTTGGCCCCACGCCAAGTGAC…
>Zm00001d037181
ATGGAGCTGAAGAAGTCTCCCGCGTCGTCGTCGCCGCCGCCGCCTCCGACGGGCTTTCGGTCAGACAGCGCGGCCGCCAGCCCGTACGTCACGGCGCCGTCCAGCCCACGCGGGCGCCTGGTCCCCTCCGAGGGAGCGGCGGGGGCCCTATTCCTGACGGCGCCGCCGTCGCCTAGTCCGTTCGGCCTCCTGCCGCCGGCCACCCCGACGCGCCTCACCGGCGCCGACCCGTTCGACCTCTTCCAGCACTTCACCAGGCCACCACTGCCGCCGCCGGGGCTGCTCGACGGCGGGAGCGTCACGCCGTCGCCGCGGTCGCCGGTCGTGGCCAGAGGCGCAGGCGCCACGTGGTCGCCGCGGCGGAGGAGCAGGGTCGGCTCCGGCGTCGACTTCGACCCG…
>Zm00001d037468
GCCGCGGCAGGAGAGGCTGCCGTGGCGGCGCCGGCGAGGGCTCCGGCTCACTGGGCGATGAGGCTGCCCTTCTTCCACCCCCTTGGGCAGCCGCCTGCCGCCATTCAGGTGCACAGGAAGCTGGCCACAGACAGGAGCGTCGACGGCGCGGTGGCCGGGGAGGTGTACGATACGGCGGTGGCGGATGGCGCCGGGTTCGCGGACGCCGAGGCGGCCAAGGCCTTCTTCCAGAGGCTGGACCAGCAGCTCAACAAGGTGAACCGGTTCTACGAGAGGGAGGAGCGGGAGTTCCTGGAGCGCGGCGAGTCGCTCCGGCGGCAGCTGCAGATCCTCCTCGAGCTCAAGGCTGCCGTCACCCAGCAGCAGCAGGCACGGCGCGGGGGGAGCGCTGCCGACACG…
>Zm00001d037492
CGCTCTTATGCTCCACATCTCATGGCAACGCACGAGCACATAGTGTACCGAAGAAGAGAAATATATTATCCCCTGAGCCCACCTGCCATCCCGGGCCAGCCCACCAGCAAAAGGCCTGCAGCTTTTACACCTAACCCTTCCAAGTTAATCGCATTCACGACCCGCCCCTTCTCTCCTGGCCACCTCCATCCATTCCACACTCCCCTTCCACATGCACCTTCCCCGCTATATAAGACACGCGCCCCGAGCTCAGGGAAGAGAGCTGCAGAGAGCGTGACGCGTCTCCCACACGGCCGCCGCCCTCGCCTTCGTGCGTTCCCCGCGTAGAGTTTAGGGTTTTGTCGCCGCCATGGCGATCCTCTCGGCGCTCGCCACCGAGGTGTTCATCCCCGTCGCCGC…
>Zm00001d037507
GCCGTTTGTTGTCGCGAGCGCGTTCCTGCCCCGCCACAGCCGAAGCTCCCAGCGTCCTCCTGCAGGCCGAGCTGAAGGTTCAGCGCGCCGGTGGAGTTCGACGACGAAACTCCGTCACGTCATACCTCTCCGCCTCCCGTCTTCCAGACGTCTCCAATCAGGGCTCCCAGCGTCTCGGAGAAGAGGAGCAGCACGGCACGGCGGCTGTGGCGAGGAAGGCTCCTGTCCCATCCCAACCCAGTTAGCAGCCGCCCAAGGAGGAGGAGATTCAATCGGCGTGCGGGCGTCCGCGGTCCATCCATCGATCCAATTCCAATCTGCAGGTCATTACTGCATTTGGAAGACTAGGGACAATGTTTGGATGTGATATGTATAATATTAAACCAGATCTTGTTTCCA…
>Zm00001d037607
GGCACATCAACGGACAGACACACACAAGCAAGGCGGCTAGCGGTGCAAGTAGTGCGAAGCTAGCTAGGTGCTGGTGCATGCAATGGCGGCTTCGCTGGGTCTGAACCCTGAAGCTGTCTTCACTTCCTACACCTCCTCGCCGCCGTTCATGTCGGACTACGTGGCGGCGAGCTTCCTGCCGCCGGCCGTCGTCGACTCCACGGACTTCTCTGCAGAGCTCGATGATCTTCACCACCACTTGGATTACTCATCGCCGGCGCCGACCTTGGCCGGGGCTCGGAGCGATCGCAGCGAGAAGCAGATGATCAGGTGGTGTGAGGGTGGTGGTGGCGAGAAGAGACTCGGTAGGATCGGGTTCAGAACGAGATCAGAGGTGGAGATCTTGGACGATGGATTCAA…
>Zm00001d037646
GTTGCTGTGGCCCCTAATGACAAATACCTCTGCATAGGAGGAAGCGATCAGAAAGTTGTGAGTTGCTTATTTGTCCTTTTAGTTTCTTATGTGGCTTATGTTATGTCGTACTGGAAAAGGTTTTATATCATAACAGAAGTGGGCGTACACATCTTAATTGGCGTCTTTCACATCCTCTGCAAGGAAATGATTGATATGCTGCCAGAAATCATAGAATTGTTCCGCTAACATGCAGGGAAGTTCTCTAAGGCAGGCAGTTGAACTTTGGCAGAAACTTGGTTGCTCCAGATGGATGTGGAGCCAGGACTCGTATTGAAGCTTCTGCTTGATGGATGGCTGAAGCTTGTGTTGGCCTTGACATTATTGAATTCTCATGCCTCTTTACAAGTAGAGTCTGTA…
>Zm00001d037811
ATGATGTTGTATCTTACTGTAGAGGATCCCTATGGTGGAACATACCAGAGTTGGCAGCAAAATGCGCCTCCTCCTCCACCCCCTGAACATGTGGTCACGACCCTGCCAGCATATGCCAATCCTCCTCCTCAGCCGCCGCCACCACCAACAGCAGCAGCGATGCTAAATAGTAGTGGTGGATCTGGTTCTAACTACTCTGGTGGCGAGATCCTACCTCCACCATCCCCTGGTGCTGCTCTCGGCTTCTCAAAGAGCACATTCACCTACGAAGAGTTGATGAGGGCGACTGATGGATTCTCTGATGCTAATCTCCTTGGACAAGGTGGTTTTGGGTATGTTCACAGAGGATTGCTGCCTAATGGCAAAGAGATTGCTGTAAAACAATTGAAACTTGGAAGC…
>Zm00001d037828
TGTAGCAAGTTGCAATCCATGTGCCCCTGCTATATAACAATCCAACCCCTCTCCTCAGCATTGTCGTGCGTAGCATAGCAGCAGCCCTTGCCTGCCTTTCGCCTTACCCTCTCTCTCTCTCTCTTTCACACAACCACTCACACTGCCGGTTGGTTTCCCTTCCGTTGTGGTTGGTGCGTACTTAGTGGCGGCCGGCCATGGCGCGGAGGAGGGGCTTCTCGGCGGTGGTGCCGCCGGCGTGGCTGCCGGCGGTGCTCCTGTTCCTGGCAGGCGCGGCGTCGGGCGAGCCGCTGCAGCAGTACTACAATGCCATCTTCAGCTTCGGCGACTCCTTCTCCGACACGGGCAACTTCGTCATCATCAACTCGGGCAAGCTGCCCAACATGCCCAAGTTCCCGC…
>Zm00001d037857
GTGGCATCCGTTTTGTCAGGCTAGCTAGCTAGCTTCTTGCCTAAAGAACACCTTATTTTGTTCAAAGGAGGCATCAGAGAGTACGTATAGGACACTGAGGAATGGGTCACTGGAAGAGCCGTCACCGCAGCGGAAGGGACGAGGCAGCTCGAGCGAAGGAAACCCGGTGCTTGGCTCTGGCCTGCTGCCCCTGCTACTACGTGCTCGGCTCCGTCGCCAGGGGGGTTGCGAGGTGCCTCTTCGTGGCTTGCTATCCAGTGATACAATGCTGTGGCCTCGACGAGTGCAGGCACCACCACCATGCCAGCAACTTCAGCCACTTCAGATGATGCATGCATATATATACATCCATCAAGCTAGTAGGAGTGCATCTTCTACTTGATCAGCAGTTCCATTTGC…
>Zm00001d037860
AAGGAGTAGCCATTTCCCCCACTCTTCCCGCCACCATGGCCGCCGCCGCTATCTCTTTGCCCCGCTCTCCCTCTCTCCTTCAACCCACGCGCCGGCGCTCAGCGCCACCAGCCTGCACGCAGTCCGAGCGCGGCGTCTCCTTCGACCCCGGCTCCGCCTTCTACCGCAGCGACAGCGCCGCGGGTCGTGACCTCGCCGTCCTCGCAGCCACTCTCCACCGCCGCCGTGGCCGTCCCGACCCTTCCGCCCCATTCCTCTGCCTCGATGCTATGTGCGGCTGTGGCGTCCGCGCGCTCCGCTACCTCGCGCAGGCCGGCGCCGACTTCGTCTGGGCCAACGACGCCTCCGAGGCGCTTCGCCCCATCATCCTTGCCAACCTCTGTCGCTTTGAGCGGGGCT…
>Zm00001d037868
ATGGGCGAGGTACACGAAGCTGACAAGAACATTGAGATCTGGAGGGTGAAGAAGTTAATCAAGGCACTTGATGCTGCAAGGGGCAATGGCACTAGCATGATTTCTCTGATCATGCCACCTCGTGATCAGATTGCACGCGTCACTAAGATGCTGGGTGATGAGTACGGAACTGCCTCAAACATCAAGAGCAGAGTCAACAGACAGTCTGTGTTGGCTGCCATAACCTCGGCTCAACAGAGGTTGAAGCTTTACAGTCGAGTTCCCCCCAATGGTTTGGTGCTCTATACTGGTACCATTGTCACCGATGATGGCAAGGAGAAGAAGGTTACCTTTGACTTCGAGCCATTTAGGCCCATTAATGCTTCCCTGTATCTCTGTGACAACAAGTTCCACACTGAG…
>Zm00001d037969
ATGAGCGGTAGCCGCAGCAAGAAGTCGTGGCCGGAGGTGGAGGGGCTGCCGTCCGAGGTGGCCAAGCAGAAAATTCTGGCCGACCGCCCGGACGTCCAGGTGGTCGTTCTGCCCGACGGCTCCTTCGTCACCACTGATTTCAACGACAAGCGCGTCCGGGTCTTCGTCGACAACGCCGACAACGTCGCCAAAGTCCCCAAGATCGGCTAGCTAGCTAGCTAGGCCCAATCGTTCTAATCAGCTAGTTTCTTTCTTTCATAAATAAAAGTCCTCTCTCGTACCCGGACTGTGATGTTTCCCTAGTTGTCTCGTACGTGTTGTTTTCTGTCTTAATGGATGCCATGGCGCCCGCGCGC
>Zm00001d038023
CTCCCGTCAGCCACTCCTCTACCGGTGACGCACGCACCCAATCTCTGATCTGATCTCTCCCCCTGGATCTCGACCTCCGCCTGGCTGCTCCGCTCTGCGTCGCTCGCCATGGCGTCCTCGACGGGGAGCTTGGAGCACGGCGGGTTCACGTTCACGCCGCCGCCCTTCATCACCTCCTTCACGGAGCTGCTCTCTGGGGCAGCAGCGGACATGGTAGGAGCCGCGGGCGCCGATCATCAGGAGCGGTCGCCGAGGGGGCTGTTCCACCGCGGCGCCACCAGGGGCGGCGGCGTAGGCGTGCCCAAGTTCAAGTCGGCGCAGCCGCCCAGCCTGCCCATCTCGCCGCCGCCGATGTCGCCCTCCTCCTACTTCTCCATCCCGCCCGGGCTCAGCCCCGCC…
>Zm00001d038143
ACCCCAGACTCAAATCAAATCTGCCTTGTCTCTGCTGCCCCAGCCCCAACTCTGCTCCAAAGCTTCAAGCATCAGCAACCCCCTCCACCACCTCTTCCTCCTCGGTCCTCACCTGGAGTTGTAGCAAGCAGCACCACATCATATCACAGCAGAGCAGAGAGTGGGGTGAAGCAGGGAGCTGGGCAGGAGAGCCCCAACGGCCTGTCCTGCCGCGGCCATGCGTTTCTCTGCGCTGCTCCTCATCGTGGCGCTGCTCTGCCTCGGCGGCGGCGGTGGCGGCCGCGTGACGGCGTCCACCGAATTCAACTTCCCGGCGGTGTTCAACTTCGGGGACTCCAACTCCGACACCGGCGGGCGCGTGGCCGCCGGCTTCGAGTCCATCTTCCCGCCCTACGGCTC…
>Zm00001d038291
ATGTCGACTGCCACCGCCGCAAGATTGCCCGCTCCCAGATCCGGGGCAAGCTATCACTATCAGACCGCGGCTCCGGCGGCCAACACCCTCTCCTTCGCCGGCCACGCGAGGCAGGCGGCCCGCGCGTCCGGGCCACGGCTGTCCAGCAGGTTCGTGGCGGCCGCGGCGGCCGTGCTGCACAAGGTGAAGCTGGTCGGCCCGGACGGGACGGAGCACGAGTTCGAGGCCCCCGACGACACCTACATCCTCGAGGCGGCCGAGACCGCCGGGGTGGAGCTGCCCTTCTCCTGCCGCGCCGGGTCCTGCTCCACCTGCGCCGGGAGGATGTCGGCCGGCGAGGTCGACCAGTCGGAGGGGTCCTTCCTCGACGACGGCCAGATGGCCGAGGGGTACCTCCTC…
>Zm00001d038297
TTTCCCTCTCCGACGACCCCCGCACCCCGTTTTCTTCTTCGTTCGTCCCGGCCGTGACATGCACGCCTTGACATAGACGGCCTCGCTCGTTCCCTTCTTCCTTCTTCTCCACACCACCAAACCCGGCACATCACATACACCAGGCCAAGAGATATAAAGCAGCCGCGCGCGCACACTAGCTTGTTGCGCTTGCCGGCCCCGAGAGGCATATATATCGTGAGGAGCAAACTGATCTATATATGGTGGTGAGGCGGGCTTGCGCGATAATGGAGGGTGCTTTCAGCGTGCCGTACTACGAGTGGCTCAAGCCACGGTCGTCGCCGTCGACGTCCTGCTGGACGACGATGACGCTCTCAACGCCATCATCGATGGACCGATTATTAGCCGCCGTTGCTGGCG…
>Zm00001d038387
ATTGGTGGCAGTGGCGCACACAGACACCACACGGGTTCATCTTCTAGCTCCCCTAGATTGCCCGGACGGGGTACTGGCCACCAGTTCACCATGGGCGACTCCTCGTCGTCATCGGCAGCCTACATCAAAATGGTTCACCATATGATAGAGAAGTGCATCTGCTTCAACCTGAGCAAGGAAGAGTGCATGGACGCGCTGGAGAAGCATGCCAACGTCAAGCCTGTCGTCACTTCCACGGTGTGGAAGGAGCTAGAGAAAGAGAACAAGGAGTTCTTCGAGACGTACAACAAGGACCGCGAGGAGCGGAAGGTGGAGGCGGAGACGATGGCGCGGATCGAGAAGATGCTCTCCGAGGCGGCGGCCTCCAAGAGCTCCGACGACGAAGGCTAGCTAGCTATA…
>Zm00001d038438
ATGTTCCTGTTCGAGGGCCCCTTCGGATCCGTCCTGCACATCACCGACTGCCTCAGCGCCCTGACGCCCCACCTCGCCCGCCGCATCGACTACCTCTTCCTCGCGCGGTGCTCCCTGCGCTTCCCCGCCACGCAGGACTCCATCCGCCAGGTGATCGACTGCATCTGGAAGCACCCGAGCGCGTTGGTTGTGTATCTCGTGTGTGACATGCTGGGGCAGGAGGACGTCCTCGTCGGGGTGTCCAAGGCGTTCGGGTCCAAGATCTACGTCGACAGGGAGAAGAACTCCGACTGCCACCAGAGGCTGGCGCATGTCACGCCCGAGATCCTCGCCGCCGACGACGCCGCACCCTCCACCCGCTTCCACGTGCTGTCGTTCCCGCGGCTGTCGGAGCAGGCC…
>Zm00001d038522
GGGCTTGCTGGCTGCGGTTGTTTTCCTAGCTAGCGCCCCTCCCCCCTTTGACCGGCGGCTATCTGAAGCGGCGCGACATGCTTGGGGTTCTGAACGCATGGGCTCGCGCGCGCGCCCGCCCATTTGCTTGCGTTGACCTCTTCCCACCACCACCCAGCACTCCGGCCGCGGAAGCCGCGCTGGGGAGGCGGTTGGTGTGGTGCCCCGCCGGCTTAGATTGATGAATCACAGCGCGGCTCGGTCGCGTGGACTCGACCTCGTCGCCTTTAGTACAAGTTGCGTCCTGCGGGACATAGCTCTCGTCCTCCGTTTCCTAGCCTTGCCAGTTTCCACGACAGAGAGAGAGAGAGCGAGAGGAGGAAAGAAGAGTCATCGCAGACAGAAGAGGGTGCTCCAGCG…
>Zm00001d038537
ATGCATCCCAAGGCACGAATCCACGCCGACCCGGTGCGCGAGGTCGACCACTTTGACTGCCTGCCGGATTCGCTCGTCCTGCTGATCCTGAACAAGGTCGAGGACGTGCGATCGCTCGGCCGGTGCTACGCCGTGTCCAAGCGGCTTTGTGGGCTTGTCCCCCTTGTCCATGATGTGTATGTCAAGATTGACCGCGTCGTGGCGGTCGACGGCGACGCTGAGGACGCGCTCAACCTGTCATCGCCGAAGCCTCGGAACATCTTCTCGCACTTCCTGAAGCTGATGCTCTTCACCATCATCAAGCCTTTCCACAACATGCGCAACCCTAATGGTACTGGGAGGTCATTGTTCCCGCAGCTCTCGCACCACTCGCCAGCGCAGGTGCTCAGGAACTTCACG…
>Zm00001d038606
ATGGCCTCGAACAACCTCCTCAACCTTCCTCCTTTCAAGATCGCGCTCAACCCCCCGCCCCCGCCACTCCCGACGCGCCCATCGGTCTTCTTGGCACCGCGTCAGATCCCACCCTGCCGCTCTCTACTCCGCAGCAAGCCACCGCCGCGGCAAGGCGTCCGATCATCCACGTCTCCGCAGCTAGACACTGCCAACACCCCGTCGCCGCCGTCTTCGAGGCAGGAGGCCGTCGCCCAGGCACGGTCCTGCCTCGCCACGGCGCTGCAGAAGCCGCTCAACAGCTCGATCCCGCTCAAGAGGCAGCGGCAGCCGCGGTTCCGCGCGGAGATCCCCGTAGTCGACGAATCGCCGGGCTCCCTCGCGCGCCTCGCGTTCGACGTGCTCTCGGGCGGAGCAGGG…
>Zm00001d038612
GGAGTATATATGCACCGTATTCTTCGGTACGACGCTTGACCTGGACGACGCCTCTAGCTAGCTAGCTAGCTAGCAAACCGACCCCATGGCAGACGAGTGGTGGAGCTGCACGCGTGCTGCCGACGACGACGACGACGCCGGTGGCTCGCCCTGCTCCACAGCCCCGGCAACAACGGACCAGCTCGACGCTGCCGACGAGCCGGCGGCGACGAGCACTGCCTCGATCGATTTCCGGCGGCCAACCTCATTATTGCACGTCGTCCGCCACGCTGCCGTCCCGCCATCATCCCCCTTAATCCTCGCCGATCCACCCCATCATATCGACGACTGGACGCAAGCCTACTTGTGCGGGAGAGCGCCGCTCGCGGCGGCGGCGGCGGCAGAGGCGAGCACAAGCCT…
>Zm00001d038651
ACGTCAGGCCGTCGCGTCCGACGCTTCGCTTACGCCTTCGGGCGAGCGGCGCTGCTCTCCCGTTCATAATGGTGAGGTCTGACGGAAATCGAGATCCCAACCAAATTCGTTTTTTTTAGCGTGGGAGAAGCGCGGCGCCAAGACGGCATTGAGCTCGTCGGCGGCGCTTTCGAAAGCTGGAGCACGCGAAGAGCACATTGCCAGAACTAGGGTTCAACAAATTACTTTCCATGATGTCAGCGTGTCCACTGCTTGAACCGAAATCAAGATTAGACCGGTGAAGTGCAAGCAAAAGAACCCCTTCTGGAAGATGGAATCAAGAACCCACCGAGTTACATTTGCTAGGGAATCTTGCAAAGGCCGGTGTGGCCCGGGATTGGAGATCGGTGAAAGGCGAAT…
>Zm00001d038799
ATGACTATGAGCAGTGGGCAGTCGTCGCCGATGGAGTCAAGCAGTAGAGCATGTCCACATAGCGACGCCCCGGCGGTGTGCTCCAATAAGCTGTGCCGCGGGATGAAAGCCGTCTACCTCGTCCTCGTCAAGAAGCACCAGCCGAAGCTCGCCGCGCTCGGAGTCCACCTGCACCACCTCCTCTCCAGAAGCAAGCGCCGCAGCAGCCTCGCCGCGCGGGAGCAGAACCCGGCGCTGATGTCCCTGTCGTCGTCGCTGTCGTGCCGGTCCATGGACCCCGCCGCCGCGGTGGTGCACCCGTACCCGCGCAGCCAGGGCCACCGCCGCCGCGGGTCGTTGTCGAGGCACGCGGCCCCGTCGCTGTCGTGCCGGTCCATGGACCCCGCGGCCGCCGTGTGC…
>Zm00001d038851
CGTGACCGTGACAGCGGACAGGCATATTCCAGCATCTCGGTGACCTACAGGTGGGCCCAAGCGTACCCTCTTCAGTCTCTCTCCCGCTCTTGGCCCGCTCGCGACTGGCGGAGTCCAAACTCCAGTCCAAACCAAACCAAACCAGCGCAGCCCTCAATTCCTCACTCTTTTTTTATCCCCTCCTCTGCCATTCCCTCCCTCTCCCCTCAACCCAGCGCCCCCCTCCCGCCGCCACTAGGGTTTCTCCTCCCCGCCCACCCCCAAACCATCCCCGAAGCTTCCAGTGCGTCGCGCCGCAACCATGAGCGACGGTAAGGACTCCCTCGACCTCTCCGCCCTCGGCGCCGCCATCCCCAACTCGGCCGAGCTCAGCGCGGAAGACAAGGCTAACCTTGTGGC…
>Zm00001d038911
ATGGCGAAGCCTTCGCAGGTGCTGGTGTCGGCGCTCGCCGCCTGGGCGGTGGTCCTGCTGCTGCTGTGCGCCGCCGCGCCGCGGGGCGCCGACGCGGCCACGGCGTGCGACGCCGCGCAGCTGACCCCGTGCGCGGGCGCCATCATCGGGAGCTCGCCGCCCACCGCGGCGTGCTGCAGCAGGCTCAGGGAGCAGCAGCCGTGCCTGTGCACGTACGCGCGCGACCCCAAGCTGCAGCGCTACGTCAGCTCGCCCAACGGCAAGAACGCCATGGCCGCGTGCAAGGTGCCCGTGCCGTCGTGCTAA
>Zm00001d038975
ATGAAGAAGCGCGCTGCGGAGGCGCGCCCGAACCTCCTCGCCGACGAGCGCGACGACATCGTGGTCCTCCAGCTCTCGCTACGCCGCATCCCCGCCTCGCGCAGCACCAAGCCGCGCCTCCTCCCGATGCCACATCCCGTTGTTGGGCACGACGGCGCCTCCGTCTGCGTCATCTCGGACGACCGCACCAAGTCGCGGTCCCCTTCCGCCTCCGACCTCCACGCGTCCATGTCGCTCCACCGTTTCCCCGTCTCCGAGGTCATCCCGCTCTCTACGCTCCGCACGGATTACCGCCCGTACGAGTCTCGGCGCCGTCTCGCAGCCTCCCACGACCTCTTCGTCGCCGACCGCGCCATCCTCCCCCTGCTGCCGCGCGTCCTCGGGAAGGCGTTCTACTCC…
>Zm00001d039032
CTCACTCTCACCCAACCACCCATATCTCTCCTTCTCCTGATCCTTTCCCCACACACGATCACACTCTACAAAGCTAGCTCCCTCGCTTACACACCTCTCCCTTTCCTCACCCTTCTCTCCACTGCGCCATACTCGATCTATACTAGAAGAGCTTAGAGACCACCAGCGCCGCAGCTCGATCGGAGGCTTGATCTGAGGAGAGGAGAGGTAGCCCACCAGCTGCTGCTCCTGCCGGCCGAACCAGCAACCATGTCGGGAGCCAGGCATGACCACCACATGCTGTCCGGGGACTTCGTGTCCCACGACGAGCTGGCGGCGATGTTCGAGCACCAGCGGGCCGACGCGGCACCACCAGCGACGCAGCAGCCGTGGTTCATGGACTACCTGCACGCGGTGGCG…
>Zm00001d039077
ATGGACGCGAGCCTCCGCACGCTGCCCCCGGCCGGCACCAGCAGCTTCCCGGGCGAGGTCCGCTCCGCCGTGTCCTCGCTGCTGCTCTCCTCCCCGGGCACCAGCGCCCTCGACACCGTGTTCTCGCACCTCCCGCCGCCGGTCACCATCCCGCCGCTCGGCTCCAGCGTCTACTACCGCCAGTGCGAGCTGCTCCGCCACTTCGCCGCCTCACAGTCACAGCCGCAGGCGCGCCAGCACGCCGCCGCCTGCTCGGCCTCCTCCTCGTCGCCGTCCTCCGCCGCCGCCTCCAGCTTCCAGTTCCAGCAGTCCGTGCCGCCCGACGACATGCTGCGGCAGAAGCTGTACCGCGGCGTGCGGCAGCGGCAGTGGGGCAAGTGGGTGGCGGAGATCCGGCTG…
>Zm00001d039103
ATGGAAGCGGAGGCGTTCCCGATACGGTTCACGCGGGGCGTGCGCGCCTACTGGCGGCGCCACAAGTACCACCGCCTGGCGGGCGGCGCCGACGGCAAGCAGCCCCGCTCGCGGCAGCTGGGCTCCGGCGGCGGCGGCGCGCGCGTGCGGCGGCGGGTGCGCGTGCTCCTGGCGGGCCCGCGGCGCGCGCTGGCGCGGGCGCGGGACGCGTACGTGGGCGGCATGCTGGCGCTGGGCAGGCGCGCGTCGGCGCTCGCGCTGCCGGGCGCCGTCGAGGCGCTCTGGGCCAAGCGGGTGCCGCGCCACAAGCAGCAGCAGCAGCAGCTCCCGGCGCCCGGCAAGCCCACGGAGTTCGAGCAGCGCCTCATCTTCGAGATCTACAAGTCCATCGTCGCGTCC…
>Zm00001d039193
ATGCCGGAGTTTGGGTGCTCACCGGACTGGCTCACATACTCTGCGGTGATCGACACGTACATCCACACTGGGAACTTCGAGGCAGCCCTCTGTCGCGCTCGCGCGGAGAAATGGCAGCTGGACCCTGTGCTCTGTTGTACAGTGAACAAGGTCCACTCAACCAGTGGCAACTTCAACGGTGCACTCAACGTATTCGAGGAAATGAAGGCAACTGGTGTGAAGCCAAACCTGGTCATGTGCAACACAATGTTGGATGTCATGGGCCATGTGTTGCAACCTTGGGTGGTGAAGACCATCCACAGGGAGATGGTTAACAAGCAAGTGCAGCCCAGTAGGACGGCTTACTATTGTCTCCTGCATGCATACACTAGGGCACTCACTGGCGAGGATGCCATGGCT…
>Novel01406
CAGAGGGCTGGGCCTGGGGCTAGTCAAGGCCGCCGACGACGGACGGCGCGGCACCGGAATCAGTGGCGTTCTTCTCCCGTTTGGACCCCCCCTGCAGCGTCATGCATGTTCATCAGCTCCAGTGTTTCTGTGTAGTAGATTAGGAGTGTAGAGAAGAGGAGGACGACGACGACGACAGCACGCGGCGACCTAATGCGAAGCGGCAGGTTGTGGTTGCGTGCGTGTACGCGTCCTCGATCGTCGTGCATCCGGGGAAAAAAAGAAGAAAAAATATCGCGCG
>Novel01446
CAACACAAATATTTCATCTAGCAGAGAATAATATAACTTTAAAACATATATCTGCAAATCCTTTAACTTAAAATCCAAAACAAATCCAATAACTTCAACTCAAAGTATTAAACATTAAGCATAATTTAAAATGATCCGATAACTTCAAATCTAGAGCTACTGTTGCTAGCCACTATAGCAGCCATAAGGCTGCAGGTCCTATAGTGGTCAACCAGACTTAAGATGGAGGCACTTGGCCTCGATTGAAGCTTAATAGTAGACGAAGGAGGCTGTTATTTTCTTCCATCGACCTCTTCATACTATCAGTGGTCTCCTGAGATGCTTGTGCTTAAGCCTTCAAGGTTTCCACTTCTTCCTGAAGGCCATCTTTTTCTTGCTTCTCGATCTCTAGTTCATCCT…
>Novel01460
CAGTGATGTTCAAGTATACCTGAGGGGGCACAGAGGACCAGATCCTGTAAACCCAGATGTGTTGTGTAGCCAAAAGGCAACAGATCGTCTGGCTGCATATGGTGAGGCGATGTCTAGTCAGCATGGATCGGACTATGACTGGAGGACTGCATCTATTGATCCTTAGGCTGTGTATGCAAGTAGTGGAAAACCCCATGGAAGGTACTCGATGTTCGATAACGTCATCGACTCGAGCCAGGTGACGGTTCAGAGGGGAGGTTTGTCGAGGTCTGCTGCTCGTAGCTCCCGTCGCTCTACTCAGGATACTACAGAAGTTGAGCAACTACGAGAAGAGCTTAGGCAACATCAGGAGCGGCAAAGGGTTCAGGAGGAATACTTGAGGCAACATGCTGCGCAACA…
>Novel01461
CTTTATCGTTTATTCAATATGGTAGGCGCCTAGACCATCCACACACACAGACACACTTTGCAACTACCACGAAGTAACACAACATAAAAAGAATATGGCACATGGTAAATATCTGGAAAATGAATAATTTTAGTAACATTTCATTCACTCAAGAAAAATAAAAGGATGAACACTTAGGATTACATTACATTTTGTAGAAGTGCATAATGAATATCTTGGATATTGCTTCTGATTACACCAACTGAAGGTCCACGTACTTTGGACCTTGAGAACACTGCATTGGATGGTCAATAGCGGTACCAACAAGCAAATCAATGAACTGGGGCCAAAACCTGTGAGCCATGTAACGGACAATTCGACAGAATCATGTGCAAGTACCAAGCAAACGACGCATAATGA…
>Novel01463
GCTTCGTAGCCGAAGATTCTAGAAAGAACACCTTCGAAAGGTCTTCTCAGAAGCAAGCGCCGAAGCTATTATCTATAAAGCTTCGGCACAAAGACAAATCTCAAGATGAAGGGTCGAACCGACTTAAAGATGAGTTGACTTAAAGACCCATGATGTTTTGTGTCATTATTGTAGTCGATTGTAAAGGACATAAATGTAATTTTGCGCAGGTTGCATCCTGTGCCTATAAATAGGTGAACAGTATCCCGGCACTGTTCACACGATCCTATAATCACGGACACATTACGCTTGAATTATTGCTTTCTGCCAAGGCGAAGGTATAAATGTG
>Novel01464
GCCTACTCGACGCCGAGGATGACCTGGACGACGACGTCGACAGCTTACTCCCCGACGACTTCTTCTCGCCTCCGGCCCAGCGCCACGAGAGCGAGCGGGAGGACGCCGCGGGCAGGAGGGCGGGCCGAGGGCTTGAGGTGGCGGCGTGGGGCATCGACAGGTGGTGGAGGGCGCACGGTGGGCCGCCAGAGACCCCGAGGTAAGCGGAGAAGGCGCCGCGGAGGGTGGCCGCCGCCGCCAGGGTGAGCCCCCGCCCCATCCAACAGCCGCGCCGAAGGACCAGATCCGTTCATCCACCGACGGCTGCTCAGTCAGTGTCACATCTTGGCAGAGGGGAAAAATAGGCACGAAAAAAAGTTCCCTTTCTTGAATCGATGCAGTTTGCTTTGGTGTTCGTCT…
>Novel01469
AGTTGCATCTCCAAAACCTGCATCTCCAAAATCAAAGACATCGGCCCGAGAGGAGGAAGCTCCTGCAACACCTTCTGCTGCCGAAGTGGAAGAGATTCTGAAGGTAATGACTGAACTTTTGCCTGTCAAGCTAAGTCCGCTGGCGCCAGAACTGACGAAGTTTTTTCAGAAGGACAAAGAAGCTTCGACAGCAGAAAGTCCCGCAAAGCCGAAAAAGCGAAGAATTATCCAAGTGGCTGATGTGATTCATCAGACACCGCCACCGACATCGGCGTCAAAAATTGTCATGGCCGAAACCACAGCCATCGGAGCCGAAACCACCGGAGCCGAAACCGGCGGAGCCGAAGCCACCGGAGCCGAAGCCGGGGCCACCGAAGATCCTAACCTGGAAACCACGCT…
>Novel01525
CTCCCTCGCGGTGCTCCCTCCATAGCGCCTGAGCGCTCTGTCCTCGGATCGGAGCTTCTCTGCGTGTCGCAGCCAAGCTTCCTTCCCCATGGCGCCCGGCGCCCAAGTCCCCAGCCGTGACCCTGCCGAGCTCCGCCCCGACTCCACGTCTCCTGGTCGGGCTCTCGTTCTATGCCTGATGCCGCTGTTCCCTGGTGCTCCCTGCTCGGTCCCTGCCCAGCGCCTGACTACAGCTCCAGCTCGCGGCGTCCCCTCTGCTTAGCCAGGATTGTCGTGCCTCTGCTCCCTGGTTTTCCCTACGCGCGAGCTCGCTGGCGTTGCCCCTGCTCCGCTTGGCCGCGTCCCCCTCAGTCCACCACTCTGCTCGGCCATGGAAGACACGCCGCACCCTGGTTCCAG…
>Novel01537
CGAAAAGATTGATGAGTTGAAGTCCCGGATGGAGGAGCTAAAAGCAGACTTGATCAAAGCAAAAAATGGAAGCCCCTAGGTTTTGATACAGAGGGGAAGCCAAAGAGGAACTTGGCTCCTGAAGCGCAACACATCTCAACCATACATTTTGTTGTATTTTGTTTTTGTGTGTTAATAAAAGCTAAGGTAGGCAACCTGAAAAAACCTACTTGCAGGATTGAAAAGAAGATTGCAACGCTTGAAGGCAAGATAGAGAAGATGGAGATGAATAAGAAGATAAAAGAGGATCTGAAGGCAGTTGCACTTGGAACGTCAAAGGTCAACTACCTTGATTCTAGAATAACAGTGGCATGGTGCAAACGCCATGAAGTCCCTATTGAGAAGGAAATTTGTATGGGC…
>Novel01548
TGAAATCAATGTTTTTAATAATCTAGCACAAATAGGAAATGTTGCATGTGTTGCCGACAGAACCATCTCACTCTCTCTTTAGTTTCTGCAATTTTTTGGACGACCGAGAGGTGCTGCCGTTTATGAGTAACTTTCCAGTGGGAAAACAGTATGCCACAACATCATGGTCAGAGTTTGGACATTGCATGAAGCACTTGCTGGACAATTGAGAAGAACTCATGCCTACTTGCAGGAGGGTTGTTGTACACGTGAGTGGAGGTCGAACCCTTCTTGTAGGGCTCTTAATGTATGAAGTACGCCATGCTAGCTATTGAATCAAGTTCAATGGGATTCGTTAAAATATAAGGAGGGTTGTTGTACAAGTGAGACAAGGTCAGCCCTTCTTGCAGGGCTCTTAAT…
>Novel01552
CTCCTTCTCATGCAAGAAGACGTACTCAATTTCTACTCTCTTCTATCAGTCTCCTCACTCCTATCTCTCATGTCTCCTTTTCCTCCCACCGTTCCTGTCACCCACGCAGCACGCCGGAGCAGCAGTAGCAGTCGAGCTCGGCATCAGCTCCCTTGCTGCTCACTTTGCAGCACCTCGCCAGCTCCCTGGTAACACTCTGCACCTGCCGTCGAACTCTCTCAGGTTCGGTCATCCCTGCTCCCTTCCAAATCAACGCCCCTCCACTCGACTCTACTACTGTGTCGTGCGCGCGCTTCCTCCTGCTTCCGTCGCTGGGTGCGTGCTCATCTTCCGTCGCGTGCCACCTGGTCGATAGAATGAGCAGTTTGGTCGTCCCCATCTCGCCGTGGTTCGTCCTCA…
>Zm00001d018665
ATGGGCTTCCTCCGCCGCTCCGCCACCACCGCCGTCCTCTTCGCTCTCCACCTCCTCCTCCTCGCCACCGCCTCCGTCGCGTCCTCGCCGTCATCCTCCCTGCCGGAGCAGCAGGACGACGACGTGCAGGCGCTGCTCCACCTCAAGCGCGGCCTCGCCTCCGGCGCCGACGCTCCTCTCCGGCAGTGGTCGCTGGAGTCCGGCGCCCACCACTGCTCCTGGCCGGGGGTCACCTGCGACGCGCGGTCCGGCCGCGTCGTGGCCCTCGCCCTCGCGCTCGGCGGTCGCCTCGGCGGGGAGCTGTCCCCGGCGGTCGCTCGCCTCACCGAGCTCAGAGCGCTGTCCTTCCCCTCGGCCGGGCTCGGCGGCGAGATTCCCCCGCAGCTCTGGCGGCTGGGG…
>Zm00001d018882
ATGTCGAACCCGAAGGGCTCCAAGATGCTCCAGTTCATCAACTACCGCATGCGGGTGACGATCCAGGACGGGCGCCAACTTGTGGGCAAGTTCATGGCGTTCGACCGCCACATGAACCTCGTCCTCGGCGATTGCGAGGAGTTTCGCCGCCTCCCGCCCTCCAAGTCCTCCAAGACTACCGGTGAACGCGAGGAGCGCCGCACGCTCGGCCTCCTCCTCCTCCGCGGCGAGGAGGTAGTATCCATGACCGTCGAGGGCCCACCACCGCCCGACGAGTCCCGCGCCAAGGCCGCGGCGGCGGGCGGAGCCCTCGCCGGCCCTGGCATCGGCCGCGCCGCTGGGCGCGGTGTGCCCACCGGCCCGCTGCTCCAGGCAGCTCCTGGGCTCGCTGGTCCTGTA…
>Zm00001d018984
ATGTACGGCATCCTGACCTCCCCCTGCCCTCGAGCCCCGCTTCTCCGCGCTCTCCCGAGCCCATCCGCCCGCGCATTCCCCAGAACACTAGCCTTCCCCGCGAGGCCCCTCCCCCGCGGTCTCCGCCTGACCCCTCCGCACGCCGCCGCGGAGGCATCGGCGGCAGCCACGGCGTTGGGCGGGCTTCTGGCGTCGCCGCTCTCGACTCTGGAGGCCGCCCTGCGGGGCCTCAACCTCGCGCCCCTTCGCGCCCCCGTGGCGGCGGCGATGTCGGCGGCCGTGCGGTGGCTGGGAGTGTACCGGGAGGTGCTGCTCGTCGGCGTGCTGCTCTCCTGGTTCCCCAACATCCCCTGGGACCGCCAGCCCTTCTCGGCCCTGCGCGACCTCTGCGACCCCTTC…
>Zm00001d019045
CTCGACTCTCCTCTCTCGCATCCGCAGCCTTTCGAGCTCTACTCCACCCCCTCGATCTCGAAGCGCAGCAGCAGCAGTCAGGCGGCCATGGACGCGAGCGCAGCCGGAGCCGGCGGGAAGGCGAAGAAGGGCGCGGCCGGGCGCAAGGCCGGCGGGCCGAGGAAGAAGTCGGTGACGAGGTCCGTCAAGGCCGGGCTGCAGTTTCCCGTCGGCCGCATCGGGCGGTACCTGAAGAAGGGCCGGTACGCGCAGCGCGTCGGCACGGGCGCCCCCGTCTACCTGGCCGCCGTCCTCGAGTACCTGGCCGCCGAGGTGCTGGAGCTGGCCGGCAACGCTGCCAAGGACAACAAGAAGACCCGCATCATCCCGCGCCACGTGCTCCTTGCCATCCGCAACGAC…
>Zm00001d019069
GCCCGGCCCGCCCGCCCCTCAGGCGTCTAACAAAGCAATCCGACCAGCTCGATCCGGACGAGCTAGCAGAGCAGATCGAGAAGGCGGCCGTGAATAGTTCAATAGTCTCGAGACCGGCCGCGGGAGCGAGGATGAGCCATCCGAGGTACGGCGGCGGCTACCCATATCCGGGGCAGCAAGGGTACTACAACCAGGGCCCGTACCCGTACCAGGGCCCGCCGGTGATGGCGCCGCCGCAGTACCAGTACGCGCAGCCGCCGCCGCCGCCTCGGTCGCCTGGATTCCTCGAGGGCTGCCTGGCGGCGCTGTGCTGCTGCTGCCTCCTCGACGAGTGCTGCTGCGACCCCTCCATCGTCTTCGTCTCCTGAGTCCTGCATGCGGTCGAGAGACACCCCTGCG…
>Zm00001d019225
CAAACCTCACCGGCGGCGGTCATTGACCGCAACTGGTTGCCGTGTTTACTTCCCCCACGCGCCACGTTTCCGCGCATCCCGAGACTCCGAGAGAGTGGCTGGCGGAACGGAACACAAATCCAATCTCGCTACGTGAAGTTCGCCTCGCGGCCTCGCCTACCACCACCCGTGCCCGTGTCCCGCCGCCGGCGGCGCTGGGGATGGCGGGGCCCAAGGCGGCTGAGGACGGCTCGGCGGCTCCGCTGCTGCCTGCGCAGGCGGGGGAACGGAGCTCAGGAGGCGTGGGCGGAGGGGCCACGTCCGCGCAGACGCTGGGGAACGTGGTTGTCTCCATCGTGGGCACCGGTGTGCTCGGCCTCCCCTACGCCTTCCGCGCGGCCGGCTGGGTCGCGGGCTCCA…
>Zm00001d019320
GGGGCTTTTTAAGGCAACGGTGGAGAGCGTCAGTGGCAGCAGCTCGTGGTCCGTCCGGGGTTTGCTGCTCCGTTTTCTTCAGAGCAGCGTCCATCCATGGAGAGGACGAAGAAACCATGCCTTGGTGTCGTCGCTCTGCTTCTCTTCCTGCTCCTGGCGTCGGCCGCCCATGGAGCTCAGCCTGCAGATGCCAAGGACATAGCAGCAGGTGACGGCGACGGCGAGAGGGCCACGGTGAGGACAGGGCACGGGCACGGCTACAGCAGCAGCCACAGCGGCGGGCACCCGAGCGGCGGCACGCCCGAGCAGGGCGGCGCAGGGGTCGTCGATCCCCGTAACCTCAACGCCAGAAGCCACCACCGCCGTGGCGCGGCGACCAGGGCAAATGTATACTCTTCT…
>Zm00001d019475
ATGCCTTCCATCCTGGCGATAAAAAAAGTCAACCAGCTGCAGCCACCATTTCTTGCGCCAATGGGGCATCCCTCCTCCATTCACAGCTTCTACCTGTACAGCGAGTACATGGCCACAGCCGCCGCCGCCGCGACGTCGTCTTCGTCGTCGTCGTCCTCGGACTCGCTTCCGTTCAGCATGGTTTGCGGCGACGAGGCGCCCGCGGCCGTGTCCTGGCGCGCCGCGGACGCCGAGGTCTCGGTGGCGGCGGTCCCCGGCGCGGGGCTGCGTCAGGCGCCTAGCAAGGGCGCGTTCATCGGGGTGCGGAGGCGGCCGTGGGGGAGGTTCGCGGCGGAGATCCGCGACTCCACGCGGAACGGCGCGCGGGTGTGGCTCGGCACCTTCGACAGCGCCGAGGCC…
>Zm00001d019479
GCGTCGCCGCTTGCTTCCTCCTCTACTTGAGTGCCGAGTCGCCTCCGCGCTCTGCAGTCCCCCGACCCGGAGCCAAAGCCAACAAACAGCCGCTCCGCCTTCTTCCGCGGCTGCAGCCAGCGCGAGGTCATCATTGAATGGCTGCAACGATGGGTTCAATATCTGCCAATGGTTCTTACCAAACAAATAGGCCCAGTGCACTAAAGCAGGCACCTCACATGCAATTCCAACAATGTTGCAACGGTGGACTTAGGTTCTTAAGCAAGCATTCCCAATCCACGCGAAGTAAGATACAGGTGGCTAAAAGAAGAGCTACAGATAATGGAATTCATCCAAAGACTACGGGACATCGGGCACCTATTGTATGTTCTGCTGGGATGACTATTGTATTTGTTGCAA…
>Zm00001d019734
ATGGAGCACTACGACTCCTATCTATGCAGCGGCAGCATGCATAGCTACGGCGGCGTTGGCGGAGCCACGGACGCGGCGTTGGACGCCGGCGGTGACGACATGCAGCGCCTGCTCAACGCGCTCATGGACGACATGGCTGCCGAGTCCGACTCCTTCTCCGACGACATGGAGGCAGCCTCCTCCGAGTCCTCGTCCTCCGCCTGCTCGGCCAACAGCCAGCAGGAGGCCACCCGGCGGCCACAGCAGCAACCGGACGGTGGCCACAGCAACGGTAGCAACAAGAGCTCCAAGAAGCAGCATCAGCAGCAATCGCCGGCTCCCTACATCGGCGTGCGCAAGCGTCCCTGGGGCAAGTTCGCGGCCGAGATCCGCGACTCCACGCGCAAGGGCGCCCGCGTC…
>Zm00001d019750
ATGGGCTCACGCTACGAGGTGGAGGTCACCGTGGGCTCCGCCCGGGACCTCAAGAACGTCAACTGGCGCAACGGCGAACTCAAGCCGTACGCCGTCGTCTGGATCGACTCCGGTGCCAAGTGCTCCACCCGCGTCGACCTCGACAACGGCGAGAACCCGACGTGGGACGAGAAGCTCCTCGTCCCGCTCCCGCCCACCTCCCGCCTCGACGACGCCGTCCTCTACATCGACGTCGTCCACGCCAACGCCGCCGAGGGCGTCAAGCCTCTCGTCGGCTCCGCACGCCTTCCGCTCCGCGACGTCCTCGACGACGCCGGGATAGGGGGCAAGGCCTCGCGCAATCTCCGCCTCAAGCGCCCCTCGGGCCGCCCCCACGGCCACCTCGACGTCCGCGTAGCC…
>Zm00001d019850
GTGCGGTGGTGGAGAACAGATGGCTAAGCCAACGATGCGCAAGCAAATACTGGATTATTTGTTCAACGACTGGTCACTGGCTTTGTCTTCTTTTCTCACCTACTTTTATTCACCTTACCTATTGGAAACATCCATCCGTCGTTCCCTTCCTGTATACGCTACTGCATGATAATCATCCATCCGTCCTCCGTGACCACGAGCATTTTCAGCTGTCAAAGCATCTGGGGGTTTCTTTTATTCCTTATTAAACGTGTACTCAACCCTCCATTCAAGGACGGATTTTGGTGGGTGGCTTGTGCGCCATAAATACCCCACATCAGGAGCCTCTTTTGGTGCGCGCGCTGTCACTCTAGCGTGTCTTTCTCCCCTTCCTGCTTTCCCTCTCCAGCTCTCATACAC…
>Zm00001d019898
ACCAAACCCACTCGCAACAACGGATAACGCTCTCTTCCTTCGGCTCCTCCCCTCTCGCTCCTATCCTCTCCCCTCCAATGGCGACCGCCATTTCCTCTCTAGTAACTCCTCCGACCCTCCACCGCCGCTGCCTGGGCCCTGCCTGCGTCTCCGTCTCCGTGTGCACCCCTATCCGCATCTCCTTCCGGCCCGCCGCCGCGCCTCAGGTGTCGCGCCGGGGCTCGGCGCTGCGGGTGTCCGCCTCCTCGGCGGTGCTCGAGGCGCCAGAGGCGGTGGCGGCGCGGAAGCTCTACGTGGGGAATATCCCCAGGACCGTTACAAACGACGAGCTCCGCGACATGTTCGCTGCGCACGGCACCGTCGAGCGGGCCGAGGTTATGTACGACAAGTATACGAATC…
>Zm00001d020042
ATGGAGACGGCGGCCGCGGCGATGCTGGAGGCCGGGGTGGGGCGGTTCTCGCGGGCGCCGGCGATGGCCGCGGCGCTGCTGGCGGAGATGTGGGCGCCGCTGGCCGTGGCGCTAGCGGCGCTGGCCACGCTGCCCAGCCTGCTGCGCCGCCTGCAGGTCATCGTCCTGCGCCTCCGCTCCCGCGGGAAGGAGGCCATCCAGTTGCACATGGGGACCTACTACTCGTCCTGCGACGACGACGACGACGACGAGGACGGCGACGAAGACGAGAGCTCCGACGACGAGGTCGACGCCAGCTCCTCGGGCGACGACGGCGAGGATCTGAAGCGAATCGGGTTCTACGAGGGGGCCGCGGACGGCGTCTTCCCCTGGGGCGGCGCCGTAGTCCGGACCTGGCAG…
>Zm00001d020058
ATGGCAAAGGGGGAGGTGCCGGCGATCGGGATTGACCTGGGAACAATGTACTCGTGTGTCGGCGTGTGGCAGCACAACCGCGTCAAGATCATCACCAACGACCAGGGGAACCACACCACGCCGTCCTACGTCGCCTTCACCGACACCGAGCGGCTCATCGGCGATGCCGCCAAGAACCAGGTCGCCATGAACCCCACCAACACCGTATTTGCTATTACTGCATGCATTTTCTTTGACCATAGCTGGAAAGATGTAATTCCAGTGGCATAGCTTCGATGCTATGTATGACTTTCTGAAGAAAAACTGGGAGATCACAAGATGGGTTGCTCTAGGCATTGTTGTTTTTTTAGATAAGAGACATGACTTATCTGACAGCTTTTGATCTTAACTAAACTCGAA…
>Zm00001d020306
CTGCATCGGCACGTCAATTTACTACTAGCACTCTATCAGTAGTGTTCAGCTGCTCCCGAGCTAGCGAGCGAAGCACTGTCGGCACAGTAACCCCCCCCTGTGCGCGTCGCGTGCCGAGTGCCGCAGAGCACGAGAAGCTAGGCCGCACAGCAAGCTTGACATCATGGCAGCTGCTGCCACTCGTTCATTGCACTCCTTCCTCGCGCTTCTTCTCCTGTTGGCAGCTGCGGCCGCGGCTGCGGCGCTGTCGTACGAAACCAAGTCCATAGATCCTGGACTCGTCGTGATGACGCTGCCGGAGCCGGTGTCCGGGCCGGAGAGTCTCGCCTTCGACGGGCGTGGCGGCGGGCCCTACTCCGGCGTCTCCGACGGCCGCGTCCTCCGGTGGCAAGGTCCCCT…
>Zm00001d020390
ATGACGGAGCTGTTCGACACGGCCGTGACCAGCCTCCTCCACCTGCCGGAGGTGCTGGATCGCCTCGCCGCTGCAGACGGCGACCGGCGGTCGGCCGGCCACCACGCGGCGCACGGCCACGGCCACGGACGCATCCACGGGCTCGGCGGCGGCGGCGGCGGCGGCGGCGGAGCGCCGATGGACATAGTGGAGAGCCCCCGCGAGTACGCCTTCGTGCTCGACGTGCCCGGCCTCTCCAAGTCAGACATCCAGGTGACACTGGAGGAGGACCGGATGCTAGTGATGAAGGGCGGCAGCGGGAAGCGGAAGCGCGACGAGGAGGAGGACATGAACGGCGAAGGGTGCCGATACATCCGGTTGGAGCGCGGCGCGGCGCCGAGGTCGTTCGTGCGCAAGTTC…
>Zm00001d020395
ACCAACAGAAAACCTCGCAGCTAGCAGCAAGATCTTAGCACAAACACCACAGCCCACAGGCTGATTAATCACTCCAAGACTAATCAAACGAACGCTTAGCTAATAGCGCGCGATCTTTTTTCCCCCTCCCCCTCTTGAGTCTTGAGCGTGCGAGAAGAGATGGCGCTGAACGGCGGCAAGACGACGTTGGTGCAGGACGAGGAGAAGCAGCAGCTTCTGCTGGAGAAGCACACCGAGAAGCACTTCACAGCGGGCGAGGTGGTCCGGGACATCATCATCGGCGTCTCCGACGGCCTCACCGTGCCCTTCGCGCTCGCCGCGGGGCTGTCCGGCGCCAACGCCTCCTCCGCGCTCGTGCTCACCGCGGGGCTCGCCGAGGTCGCCGCCGGCGCCATCTCC…
>Zm00001d020437
CCACTACCTCCGTCGCAGGCGCAGGCCGCGCAGTGCAGGGAATCATGGCCACGCTCTACCAGCACCACCTCCTCCCCCTGCAGCGTCTCCCCAACTCCCCCCGCCGACCGCCTCCTCGCCTCCGCCTCCCCACGAAGCCATCGAGGCACCACAATCGGCAGCTACGACCCCGCGCGGCAGCCAGCACAACGGCCACAGTGTCTGCGATGGAGGACTTCCGCCGGTGGCTCGCCTCTCATGGCGCGGGCGATGGAGGAAAAGCCATTCCAGCCGCCGTGCCGGAGGGTCTCGGCCTCGTGGCGGCGCGCGATCTGCCCCGCGGGGAGGTGGTCGCGGAGGTGCCTAAGAAGCTCTGGATGGACGCCGACGCCGTCGCGGCCTCCGACATCGGCCGCGCCT…
>Zm00001d020488
ATGGCAGCCGCCGCGCCCGCGCAAGGGAAGTTGCTTCCCAAATCTCGCAGACAAGATTTCCTCTCGTGGATCCCCCAGGCGCTCCTTCCATCCTCGCGGATCCGAGCGCGCATCCCGCAGCCGCCCCACGTGCTCACCCCTCCTCCCACATTCCTCCACTCTCGTCGTTGCCATTGCCAGGAGGCGCTCACCATCGCTTGTCGTCGTGAGGGCGACCGGAGGATTCCGGTCAACGCGTCGTCCGTCGACTTTGTCTTCGCGGGGCGTGCCCTTGACGCCGCCAAGCTCTTGGCTGACCTGGCGCCGAGGCCGCGCGGATCCTCAAGCCCGATGATTGATCCAGCACAATGCCGAGGAGACTGGAGACTAGACTTGGAGGTGCTACTGAAGGATGTGACT…
>Zm00001d020693
GGGAGGATTTCAGCCATTCAGGAGGGCCACCGTACGCAGCGAGACCAGCCAGCAGGCGGCGATGTTCGCGACGGCGGTGCGGTGGGCGGCGAAGAAGGGGAAGCCCAAGATGGCGCCGATCGAGCTGACGGCGCCGCCGGAGCAGGCGCAGTCCATCACGCGCGCCATCTTCGACGCCGTCCGGGAGCACGGCCCGCTCACCGTCTCCGACGTCTGGGACCACGTCAAGGATGTCGGGCTTCGAGGTCTGGCAAGCAAGAGGCAGATGAAGATCATGCTGCGGTGGATGAGGGAGCGCCAGAAGCTAAAGCTCATCTGCGACCACGACGGCCCGCACAAGCAGTTCCTCTACACCACCTGGTTTACCAACCCCAGGAACGCGCCGCAGAGGCCCAATCC…
>Zm00001d020705
ATGGAGTTTGACCTGCTGAATTACAGCCCGGAAGCGCAGCTTGAGCTGATGACCACGATGCTCCAGCTGGAGCAGCTAACTGCGCTCGACGGCCATCAGTTTCCGACGATGGCGCCTGTCTCGCCGCCGATATCCCCGATGCAAACCCATCATGCAGGTCACAGCTTGTCGCCTCCGCCACACATGTCGGCGACGACGACGACCACCACCACCGGGTACCCAGAGCAGTACACGCCGGCGGCGGCCGTGTACGGCGCCACCGCTACCGGCCTCGAGCACCTCCAGGACTACGTGCTGTCCCCGCCGGGCGGCGACTGCGGCGGCGCGGCGGCGGCGCACGCGGGGTCGACGTCGCCGACGTCGGCGGACGCGATGCGGGAGGCGATCTTCCACATCGCC…
>Zm00001d020711
ATGGTTGGCTGCTCGGTCGCGTGGTGGGAGACCATGACCTGTAAGGAGGAGGAGGGAGGAGATCAGGAGATGGAATTCAAGAACTGCGGGTCGTCGTCGCAGCCCCGGCCGGCGGTGGTAGTGGGCGAGGAGGCGGCGTTGGCGAGACAGGGATCAGTCTACTCGTTGACGTTCGACGAATTCCAGAGCGCGCTCGGCGGGGCCGCCACCGGCGGTGGCGGTGGCGGCAGCATCCCCAAGGATTTCGGTTCCATGAACATGGACGAACTGCTCCGGAGCATCTGGACCGCGGAGGAGACCCAGGCCATGGCCTCCGCTTCTGGCGCTGGAGCGGGTGCGGGGATGCCGCCAACGTCGCTGCAGCGGCAAGGGTCGTCGCTCACACTGCCCCGCACGCTC…
>Zm00001d020717
GAAAGATCCCTCCAGGAAAGATTTTTCTTCCCTCCTCCGACGCCCCAGCCCACCAACACACTCTATAAAGCAGCCCTCAGTCACACACAGAACGCACAAGCGCAAGCCGGGCAAGAAAACTCCGCAGGCCAGTCTGCGAGTTGGATGGCCTTCTTCTTGGCCCTCGTGTGCATCCTCATCTTGCTAGCCATCGCCTCCTACGTCCAGTACACTCGCTGGCAAAAGGGGAAAGGCCGCTTCGGCGGCCATGGGAGGTCTGCTCCCTTGAAGCTGCCTCCTGGCTCCATGGGCTGGCCTTACCTTGGCGAGACCCTCCAGCTTTACTCCCAGGACCCCAGCTTCTTCTTCGCTTCCAAACAGAAGAGGTACGGCGAGATCTTCAAGACGCACCTTCTGGGT…
>Zm00001d020722
ATGTCCCATCTGAACATTCTCTCCTTCAAGTACAACCTTGCGAAGCTCCGGTCCAAAGCCGGGCGCCGGCGAATTGGGCGGGCGCTGTCGGCCAGGGACCGCCAGTTCTCCGACCTGAGCACCTACAGGCCCGACGAGGAGGAGATGAGGAAGGTTTTCGGCATGATAGCTGGCCAGCCCCGTGGCGTCAACAAGAGAGACCTCCAGCTGCTCCTGGAGCGGTTCGGGAAGGCGGACGCCGCCGCCGAGGCCCGGCGGATGCTGTGCGTCGCGGACCACAACAAGGACGGGTACATGGACCTGGAGGAGTTCATGGAGGTGCACAGGAACGGCGTGCAGCTGGGGGACATCCGGCGGGCGTTCTTCGTGTTCGACAGGGACGGGGACGGCAGGATCAGC…
>Zm00001d020731
GACGAACGCCGGGAGAAACAGGCCGATCCGTAGCTGCCTGCACACATCGGTGATCGTTCGATCCATGTGCGATTGATTGATCAGGGAGGAGCGAGTGATATAATGCCTTGCTTGGCGCAAGAGTTCCACCCGAAGCTGCCCGCGGCGAACCACTACTGCAAGTCCTTGTCGTCGCTCATCCGGGAGACCTACGCGCACTGCCATGTCCCCTGCGTCGGGATCGCCGGGTGGAGCTCCGGCGGGGACAGCGACGACGACAGCGTCCTCGACGAAGCGCGAGATACCAAGCAGGTGATCCTCAGCGAGATGAGGAGCCGGCAGATGAAGAGGCGGTCCAGGTGCAGCGTGGACTCGCCGACGCCGCTGCCCCTGCCGTCGTCGAGCTCCGCTTTCGCCTGG…
>Zm00001d020744
ATGGCCAACGCCGACGCTGGCGACGGCGACGAGGTCATCCTCGACGCTCCCGGCTTCATACGAGTGTACAGGAGCGGCCGCGTCGAGCGCTTTCTGCCGGTCGACTTCGCCCCGCCCTCCACTGACGCCGCCACCGGCGTCTCTTCAAAGGACGTCGCCATCCTCCCAGACGCCTGCCTATTGGTTCGCATTTACCTCCCATTGCCCCCCTCTTCCGGAAGTTACAGCGGCAAACTCCCCGTCCTGGTGTTCTTCCACGGCGGCGGGTTCTGCCTCGAGCATCCGGTCCCCGCTCTCTACGGGGACGCGTGGACGGCGCTCCAGTGGGTGGCCGCGCACTCCGTGGGCCGGGGGCAGGAACCCTGGCTGACTGCCCACGCGGACCTCGGGCGCGTCCAC…
>Zm00001d020794
GTGCATAGCAGCAGCAAATAGTGGTTGGCCTGTTGGTACTCTATATCGTCCCTTCCAGTGTACCCGTCCTCCAGCCCATTATACATTATACTTGCTCCAGATAAGACCAAGAGCGTCATGGCCAACGCCTTGCCTCTCATCGTCGCGCTGGTCGCCGCCGCCGGGTGCGCGGCGCTGGCTTCGGCCACGTCGTACACCGTCGGCGACTCGCAGGGCTGGACGACAACCGGCGTCGACTACAGCAGCTGGGCCAGCCGCAACACTTTCGTCGTCGGAGACACACTAGTGTTCAACTACGTGAGCAAGGCGCACACGGTGACGGAGGTGAGCAAGGCCGGCTACGACGCCTGCTCCGGCGCCAACGCGCTCAGCGACGACGACACCGGCTCCACCACCATC…
>Zm00001d020811
ATGGCGTCCGGGCAGAAGCAGCAGCAGCACCTCCCTAACGTGCCGAGATGGACGCCGAGCCCGCCGCGGCGCCAGGCCCGCGGAGACGCGCACGACGAAGAGGACGCGGAGTCGGCGCTGGGAGCGTCGTCGTCCATGCGCAGCACCGACGAAGCATCGTTCCCCTTCGGCAGCGGCCGCGCGCGCTCGTTCCCGTTCCCGCTGACTCAGCCCTCGCTGGAGATCAGCGTGGTGGCGGCGGCGAACGGGACAGCCGGTAGCGGCGGCGGCGGCGCCGATGGCCCCGTGGCCCGCGAGAAGTCGCTGCGCCGGGCCGACGAAGGCGTGGTGGTATCCTGGGAGGACCTGTGGGTGTCGGCGGCCGGCGGTAATAAGGGCGGCCGCGTGCCCATCCTCTGC…
>Zm00001d020821
GTCCTTTGGATCACAACAGACGGCCAGGATTCGGCCCGAGGTCCGGTGGCAGCATCGCTGAACCCCTCGTCGCCGGTGTCGCTCTCGTCTGCTTCCATTTTGTAGGCTGCGCGGTGTATACTGCTTCCACTTCACACGCTTCCTCCACGCCACCTCGATCTGTGCGGCGGCAAACCCAGAGATCCTTGCCCCGTCCGCCGGCGAAAGGCGCTCACCTCCCCTCTTCGCTGTCTGCGATGCAGAGGATACTATCGAGGGCCGCTCGCCGGTGCACGAACTCCTCGGCGGCGTTCAACTCACCTCACGCGCAGGCCAATGCAGCAAGTGTTCACTCTGAAGACGCCCCAACTTGTTCAAACATGATTACAGAGAACGATGATTTTACATGGAAGACTAGTT…
>Zm00001d020883
ATGTCCACAATGCGAAATGCAGGGGCCAAAGGATGGGGTCTCACCTGGATCTGGATGATGATGGTGACGATACCCGTACACCGTAATGGCAGGTACCGCCAGCGCGAGTTCACAGTTCCCGTCGGTTTAGGGTCACAGACGGGATCCCGCCGGTGTCACCATTCTCGGGTTCGCTGTCGGCTTCATCAAAGGATCGGATTCGACCACCTCCATGAGCCGCGACCACATCCTAGTGCCGCCGAAGAACCACGACCCGTCGCCGTTGGGGCAGGGCACCACCGTCACGGACGCGGACCCCAGCCGGCCATGGCGCACCCAGGGCAGCACGAGGCTGGTCTTCCCGAACCCGAGGTCCCTGTCGATGGCGAACTGAAGCAGCCCGAACATGATGAGCGCGGG…
>Zm00001d020886
GCATCAGAGCCACTGAGACCGACCTTATGGAGTCTGCCATGTTTGCCGGCTGCTGGCTCCTCGCGGCTTCTCTCGTGCTCGCAACGCTCGCGTCTCCCCACCGTCTGGGCGCGGCGGCGGGTGAAGGAAGCGAGACGAAGTGGCACGTTGTGAGCGTCAACTCGCTGCTGCCCAGCACGGTCTGCACGCCCACGAAAGCGGCACCCAGCTCGTCGGCGCTTACCGTCGTGCACGGGCACGGCCCGTGCTCGCCACAGGAGTCACGCCGCGGCGCACCGTCCCATACCGAGATCCTAGGAAGGGACCAGGACCGAGTCGACGCCATACGCCGCAAGGTGGCTGCCGTAACTACTGCGGCGTCCAGCTCCAAGCCCAAGGGCGTGCCCCTGCAGGTTGGCT…
>Zm00001d021038
ATGGATGTCCGGGTGCCGCCGCCGCGGCGCGGCGTCACGCTGGCCGAGCAGCTCGCCGCGTCGTCCAACCTCCGCAACCTCCTCAAGCTCCGGGACGACGGCGGCGAAGGTGGAGGCCGCCCCGCCGCGGCGGGGAGGCGGCGCACGCTGCTGGACGCCATCCGCGACGCGGACGAGGGCCGCCGCCCTCCCGCCGTCGCTTCCGGCCGCCACAGCGTTCGTCCCGCGCCAGGAGGCACGGCCACCGCGGCGCCGGGGTCCGCCGCGCGGGGGGCGAGCCAGAGGGTGTCCCTGATGGCGCTGCTGGAGCGGACGGAGCAGCAGTGGACGTGGAAGCGCGCGGACGCGGAGGAAGCGGCGCCGGAGGAGGAGGAGAAGGAGAAGGGCGGCGGCATGGGC…
>Zm00001d021050
GCCCCCATAACTACTCTGCCACCAATCCGGGGAGGAATCAACCTAGCGGTAAGCGGACATGGCGGCGGCGAAGATAGCGCCGTCGATGCTCTCGTCGGACTTTGCCAACCTCGCTTCGGAGGCTGAGCGCATGGTCCGCCTAGGCGCCGACTGGCTACATATGGACATCATGGATGGGTGAGTTGGTCTCTAATTCTCAATGAGGATATTTTACTTCTATTGTGGTTTGCTACTGAAGTGTCCGGTGGTATAACTCTCAAATATCATTCGCCTTTTAAGCTGCTAGCATGATTGTAAGGTCGCTTACCACAGCTTACAGGAAGTAACTTATATGATGAATACATGACTGAAAGTAAAATTTTATACCCAGTGTCACTGTCCTTCAACTCATTCAGACCC…
>Zm00001d021073
ATGCCGGCCACCACCGGCGCGCCGGTCGCTGCGCCAGCTGGGGCTCGGCGGCCGCTCCTCTTCGGCGCCGCGCCGCGTCCGCAGGCGCCGTCGCCGCCGCTGACGACGACGCGGTGTCGCCGCGCCGCGCATGGAACGCCTCCGCCGCCGAGCTCGAGCTCGGGCGCCGCGGCGAGGAGACGAGGGGTCAAGGAGTACGTGGAGGCGGCGCGGGAGATGGCGCGGCACAAGGACGGCGGCCCGCCGCGGTGGTTCTCGCCGCTCGAGTGCGGGGGCGGCCGCGTCCCCGGCGCGCCCACGCTGCTCTACCTGCCCGGTACCGTTTCCGTTTCCTCGGACAGGATGTTCGATCTGTGGTGCTTGCACATACCAGTCGAAGACCGAACGCCCTTCGCAGGG…
>Zm00001d021087
ACTCCTCCCTGTCTCCCCCCGCTGCGTGTCCCCTGCCCTGTCGCCGAGCCATTCGATTCCTCTCCGCTGCCCCCAAGCGAGTCGCCGCCATTTCGCCGATTCCCGGCCGCTGCCTAGGGTTTTGGTGCCAGCGCGGTCGGAGGGTTGTGCCTGTGGGTCGCGTTCCCAGTGTCGCGCGCGGTGGCCGAAGGTGGAGGGAGGAGCGGTTCTCCGGAGAGGAGGTGGAGGTGGTGGCTGCGGAGTGCGGTCTCCACGGAGCGAGTCTACCAGATGCCGCCGCGGTCTTTGAGGAGGTAGTGTGGCCGTGTGGAGTGAATAGGTGGTGGTGGTGGTGGCGGCGGCGGCAGCGGGACTGGCGGAGGCAGCCATGTTTTTCAGCAGGCTCGATGACTCGCCCAT…
>Zm00001d021128
GGAGGCTTTGCGGCGATGGACCGGGTCGGCGGCGGCGAAAAGCAACTGGAGGATTGCACAGTAGCCAAGTCAGTGATATCCCCGCTCGCTCTCTCTCTCTCTCTCTGTACCTCTTCCTCCCTGATTGATGGATTAGATAGTTAGGTATATCTTCCCCTGTTGGTAGTAGGTGCATGATCGGGATTTATTTGTACTTCGCATCGACTGTCTTCCTTATTAGGACGCTAATTGTTGTGGAGGCGATAAGCTGGACCCGTATTTATCCTATGATGCTGCTAGCGATGGCTTCTGTTCGAAATGTTTGCTACGATTTTGTAGCTTGCTTGTACTGATAGATGCATTCTTGTGCACTGTGCTGCGTGACTGGGAAAAAAAATAACTGACGTCCCTTTGCAGTCG…
>Zm00001d021176
ATGGAGGCGACGGCCGTGAGCTTGGCGAGGTCCGTTCTAGACGGCGTCTTAAGCAGCGCCGGTTCTTCCCTCGCCGATGAGGTCGCGCGCCTCATTGGGGTCCCGAAGGAGGTAGACTTCATCCGCAACGAGCTAGAGATGATGCAGGCCTTCCTGAAGGTGGCGTCCACGGTGTATCCCGAGGCCACCGTGCGCAACGACATCGTGAAGACGTGGGTGAAGCAAGTGCGGTACCTCGCGTGCGACGTCGAGGACTGCCTGCTCGACTTCGCGCTCTACGCCGACAGGAGGTCGTCCTCGCGGCTCGGCGCCTGGCTCCCCAGCGCCATCGCCGAGCGCCGCCGCATCGCCGGGCGGATCCGGGACCTCAAGGCCAGCGTCGAGGCGCTGAACCAGCGC…
>Zm00001d021231
GCACCGCACTCACACCATTTCACCATCTCTCCGCGGAAGCAGATCCTCTCCGCTCGCCAGCCTCCCCCTCCTGCTGCTGCCTCCTCGCTTCAAGCAACACCCGAAGCGGCAACAACCACCACCACCACCACCACCGGACCTGCCTGAGCGACCCCTTGGCTTCCCACTCCACTGAAGCAGGGCGAGAGAGAGTAAGGAGGAGGAGGAGAAGCCATGGCGAGCGACGGCGACGGTAAGGGCCGCGTCGCTACGGCGCCGGGGGCAGGGTACGGGTACGCGGCGTACGGCGGCTACCAGGGGGCGGAGGAGCGGAAGTGGTGGCCGTGGCTCGTGCCCACCGTCATCGTCGCCTGCATCGCCGTGTTCGTCGTCGAGATGTACGAGAACAACTGCCCCAAG…
>Zm00001d021245
ATCTCCTTTCAGTAACAGTATGCAGCCTTAGGAGAAGCTAAGCTGTCTTCTAACTCTCTCTCTCGAGTTCATAGTTTTTGCTCTTCCTCTCTCATGGTCACAATGCTTGCAGCTAGTTCTCTAGTGAACAGCAACCTCGCTTGCTCATCAAGGATATCATCCTGTTCAGACTTCACATATAGCCACTCCTGGCGTCCCATACATGCTATGAAACTCCATCAGATGCGTGCTGTGAGCTCAATACGTATAAGTTGTGCTGCCACTAAACCTGCAAAGACTCCTGCTGAAGAAGAATGGAAAGTTAAGCGGCAACTGCTATCAGAAAAGCGGGTACGAAGTGTCGATGTGAAGGAAGCACTGCGCCTTCAAAAGGAAAACAACTTTGTCATTCTTGATGTC…
>Zm00001d021268
AGGCCGCGTGCGCACGCCACCGCGCTTCATTGGCCACGCCGTTGCCATCACGCCGATTAAACTAGCCGATCGATCGCCCAGCTCGCCTGCCTGTGATCGACCGGGTCGCTGCCTCCGATCCTCTTGCTGCCCAGCACCCTGGCTACTTCAGCCAGCTAGCCAGGTTGAGACCGACTAGCTCGATCTAGCTGCTGAGGCGTGGCCATGGAGGGCGACGACGACGGCCCGGAGTGGATGATGGAGGTGGGCGGCGCGGGCGCCACAGGGAAGGGAAAAGGCGGCGCGCTGGACAAGAACAAGAAGCGCTTCAGCGAGGAGCAGATCAAGTCTCTCGAGTCCATGTTCGCCACGCAGACCAAGCTGGAGCCGCGCCAGAAGCTGCAGCTGGCGCGGGAGCTC…
>Zm00001d021283
AACTATAGATACATTAGGAGGTATAGATGGTTCTGACAAATTTGACTTTAAAACTAACTCTTAACTCAGTATCATATTAACTATAAAATTTATTGCAGGGGTAGGGGATTTGGGCGGCCGTGTGGCGGAGCCGAGGAGCACGTCGCTGCGTCAGGACTCAGGACGGGAGAATAAAGAGTAAACAAACCCATCCGCGCTGCAACAGTGCGGTGTTTGTGAATGCAAAATCTAGCCAGACAGCTGAGGAAGGGTGAAAGCCTCCTTGTTCCTGTAGACTGCAGTGCGAGGAGGAGGCCGCCGCATCCTCCCCTTCCAAACCACTCCACTCCGGTCCCCATCCCACCTGCGCCAGCTTCGTCTTGCTTTGAGCTTTCGCCCGCCGGCGATCTGCTAGCTATC…
>Zm00001d021403
CGATGGCGGCCGCCTCGTCCGCGCCCTTCTTTGGGCTCGGCGACACGCAGATGCAGCCACAGCAGGGATCCAGCTCCTCTCTGCAGCAAAACTCCACAGCTGCTCCTGGCGCCGCGGCGGTGCCGCCGCCAAAGAAGAAGAGGAACCAGCCAGGCAACCCAAGCAAGTCACATACATACCAAGCCCTAGCGGCCTACTACCTGCAGTACATACATGCATGATTCATATGTCAATGATATATGAGCGACCATCACCACCATGCATGCAGATCCTGACGCGGAGGTGATCGCGCTGTCTCCGCGGACGCTGCTGGCGACGAACCGCTTCGTGTGCGAGGTGTGCAACAAGGGGTTCCAGCGGGAGCAGAACCTGCAGCTGCACCGGCGCGGCCACAACCTG…
>Zm00001d021422
ATGCCTGCAATACCCACCTCAGCACTAGTCTCCTCTTCGCACGAGCGCAACACCATCCACCCACCAGTTCGAAGCGGAGGCGACCGGCAACCTGCGGCGGAGATGTCAGGCAGGGGCAAGGGCGGCAAGGGGCTCGGGAAGGGCGGCGCGAAGCGTCACCGGAAGGTGCTGCGCGACAACATCCAGGGGATCACGAAGCCGGCGATCCGGAGGCTGGCGAGGAGGGGTGGCGTGAAGCGCATCTCCGGGCTGATCTACGAGGAGACCCGCGGCGTGCTCAAGATCTTTCTCGAGAATGTCATCCGCGACGCTGTGACCTACACGGAGCACGCCCGTCGCAAAACCGTCACCGCTATGGACGTCGTGTACGCCCTCAAACGCCAGGGCCGCACTCTCTAT…
>Zm00001d021461
GCCGTGCCCTGCGCGCATTCGCCAGCCGGCCCAGGCGCCCAGCCGCTTAACCTTCCTGCCCGCCGGGCCCTGCTCGCAGCCGACGTTGGCATTAGGCACGCCTGCGACCGACCGGCATGGCGCGATCCATCGATTGCGCCACCGACAGCTCGGTCAAGAACGTGGCGCTGGACACACTGTTCCTCATCGTCCTCCAGGCGGCCGTCGTCATCGCGCTCGGCAAGTTCATACACCTCGGCCTCCGCCGCCACAACCTGCCCAGCGCCACCTCCCAGATCATCGCGGGGATCGTCGTGGGGAGCCTGGGTCTGCACGACGTGATCGTGCACGTCGACGTGGAGAACGCGGAGGACACCTACGGCCGCTACGTGTCGGAGGCGAGAATCTTCTACATGTTCT…
>Zm00001d021629
ATCATCAGTCATCACATACCACCAAGACCACATCGGCACATCGACGTGAGCTCGTGCGTGAGTGCCCTGGTCGACGACCGCTCGCGCGCCATGGACTCAACGACGACGGCGCCGCTGCTGCAGCCGTCCGCCGCCTCGAGCAAGGAGGGGCCGGGGCCGGCGCCGGCTCAGCACGGTGAGGGCAGCCGGGAGCTGGAGGCGATCCTGGCCGACGCGTCCAAGCCGTGGGCTTGGCGGGCCTGGGAAGGCGCCCGCCTGGAGCTGCCGCTGCTGCTGCGGGTGGCGCTGCCGGCGGTGGCCGTCTACATGATCAACTTCGTCATGTCCATGTCCACGCAGATCTTCTGCGGCCAGCTCGGCAACCTCGAGCTCGCCGCCTCCTCGCTCGGCAACACCGGC…
>Zm00001d021638
ATGGACCACCTGCCGCTGACCTCGCCCGCCGCGCCAGCCGTTGCGGCGTCGCTGCTCCCGTCGCAGGGCGGCGGGAGGGTGCTCGACGCGTACAAGACGGCGCTGGCCACGGCGGCCTCGGCCGCGGCGTACGCCGTGATGGCGCGAAGCATGGCGCGGGAGCTGCTGCCCGACGAGCTGCGCGCCGCGGCGCGGTGGTGCGCGGTTTTCGCGCGCGCCCGGTTCGGCCGCGGCGAGAAGGAGCGCCACACCATCGTCATCCGGCACCAGTTCGACACGGGCTACAGCGAGAACCACCTCTTCGACGCGGCGCGCGCGTACGTGGCCACCCGGATCGACCCGCGCGCCATGCGCCGGCTCTGCCTCGCGCGCTCCCGCACCAAGGAGCCCGACGGCAGC…
>Zm00001d021647
AGGGTTGTGCGCCAACCAAGCAAGCACACCGCTAAGCCTGCTGCCGCCTCCTCGCGGCCCAGCAGCATCAGCTAACTAACCCGCCCGCGCGCCGTACGTGCGCGCGCCTGCAGCTGCTCACAAGTCACAGCTAGATAGTAGCTACTAGCTAGGCAGCTAGGAAGAGAAGACGATCAGCATGGCGGGGGAGATCGTGGCACCGTCGGGGAGCCGGCGCAGCTGGCTGTCGGCGGCGTCCATCTCGCGGTCGCTGCACGCGGCAGGCGACCCGGACGACCCGTTCCGGCGGTCCCAGGCTAGCCGCGACGACGGGGACGACGAGGAGAACCTGCGGTGGGCGGCGCTGGAGAAGCTGCCGACGTACGACCGCATGCGGCGGGGCATCATCCGCAGGGCGCT…
>Zm00001d021664
GATTCCTTTGAGAGGGATGAGAAGCCAGAAAGCGAGAGGGACATCGAGATGGGGAATCGAAATCCCAAGGACAACTCCGACTACGGTCTCAAAGACTTCTTTGAACAGGTCAAGGAGATTGAGGTGCTGTTGGATAAGATGTCCAACATAGTTCACAAACTTCAGGAAGCTAATGAGGAATCCAAGTCAGTCACCAAGGCTTCTGCAATGAAAGTGATAAAGGAGCGCATGGAGAAGGACATCGATGGAGTACTGAAGATCGCACGCAACGTGAAAGTGAAGCTGGAACAGATGGACAGAAACGTATGGACATTAAGCCTGACCATGTCTTCAGCGTGTGATTCACTTCACCCGATGCTCGCCAGAGCTCATTATTCTCCTCTTCGGTTTGCAGAATCT…
>Zm00001d021684
AGTGCAGTGCAGGACGAACTCGACATGGGCACTCTCCCCTACCTCTTACTTGTCGTGCTGTCCTCTCTGTCGCTCGTCCCCCGCGCCGCCGCGTACTCGGAGTACTCGTGCAACGGTACCACGGGCAACTTCACGGCGGCCAGCGCGTTCGGCGCCAACCTGGCCCGCCTCGTCGCGGCGCTGCCCGCCAACGCCTCCTCCTCTCCGTCGCTCTTCGCCTCGGCGGCCGTCGGCGCGGCTCCGGACACGGCCTACGGCCTCGCGCTGTGCCGCGGCGACGTCACGGACGCCGGGGTCTGCTCGGCGTGCCTAGCCGACGCGTTCGGCAGGCTGCGGCGGCTCTGCGGCGCGGACAGGGACGCCACGTTCTACGCCGACCTGTGCACGGCGCGGTACTCC…
>Zm00001d021730
ATGCAGGCCCCGCCGGCGCCCTCCTCCGTCGACCTGCCGCTGGCGGTGGCGCCGCCGCCGGTGAAGGCGCCGACCCCGCGGCCCCCGCCGCCGGCCTCGCTGCAGCCCGAGTCCCCGGGGGTCTTCTTCTCCGCCGCCGCCGCCGCCGCGCCCCTGGGCACCGCCCACCGCCGCATCGCCATCGCCGTCGACCTCTCCGACGAGTCCGCCTACGCCGTGCGCTGGGCCGTCGCCAACTACCTCCGCCCCGGGGACGCCGTCATCCTGCTCCACGTGCGCCCCACCTCCGTGCTCTACGGCGCCGACTGGGGCGCCGTCGACGTCTCCCTCCCCAACCCTAGCGCCACCGCCGCCTCCGAGGACGGCGACGGCGACTGCGAGACCGCCGCTGCCGCGCGC…
>Zm00001d021843
CTCACTCGACAAAAACAAATCTCCCTAATTTCAGTCATGAAGGCCCAGGTCGCAGCAGCAACTGTCTTGGTCTTGCTCCTCCTGACCTTTGCTGCGGAGGCTCGTACGTGCATGTCGCGAAGCCAGGAACAGAAAGGGAGGTGCTTTCACGATACGGATTGTGCCGCCGTCTGCGTCAAACAGAGCTTCACCGGAGGCTTATGCAACGGGCGGCCGCCGTTCAAGCAGTGCTTCTGCACTAAGCCATGCAAGAGAGAGAGAGCTGATGCTACACTCCGGTCGTCAGGCCTCTGATCATGTTGTGCTTGATCCGCATGACAGCGCGACTCTCGCTTGTATGCCTAGGTTGATGTGTATGTAATAAATAAACAAAATAGTAAATGACATGTTTTTCTTACA…
>Zm00001d021905
ATGGCCAGGAAACAACTCCACGGGGCATGGGGCTTTGATTTATACGGGGCATGGGGCTTTGATTTATTTGGAGGGGAAGAGAGCAGAGGGGCGCAGAAGAGGGCGAAGGCCGACGACGGCCATCAACACATTAATAGTGTTGGCGTTCACAAAGAAGAGTGGGGAGATGAAGAGGAAAAAGGGGCGGTCATTTCCGTTGCACGGGGAGGCGGAGAGGCATGGGGAGGTGAGACGTCGGGCGGCGCAGGGCAGGCGGGGCGCCGGAGCACCGGGGCGGTGGCGGCGCCGCGCCGTGCTACGCACGCGCGAGAGCACGGTACGTGCAGCCGGGCAAATGAAGGGAAGCAGGGGCCACGTGACTGGGAGAGAAGGGGAGGGGAGACAGGGAGAGGTCGAGAG…
>Zm00001d021933
AATATGGTCTTTTACCAGTTCCCACTCATGGATATTAACAAAGGCCCAAAGAACAAACCATCAATTCTGGGAACTGTTTCTCTCAATCTAGCAGATTATGCATTGACGGCTGGAGAGACAATTGAGATAATTCTTCCGTTGTCTATACCTGGTGGTGCACCTGAACGAGCCTCATCCCTTCATCTCACTCTGAGTATGGTTGAATTAAGAGCTTTTCAAGAAACATCTGATGCATCACAGCGATCTGCTGCAACCTTGCCATTGTCCCCATCACCTAGTGATTCTCTTCCTGGAGGAAAATATGAGGTTTTGGTTATTAAAGCAGGGTTGAGGAAGGTAAAAATTCTCACAGATCTGGTGTCGACACGAAGGCCTAAGAAGACTTGCCAGGGAGGTGGC…
>Zm00001d021938
AGGCAAAGGCACTGCACGCCACCTTATCTCTAGCCGGAGATCAAAGAAGTAGCCGTTAACGATGGCTTCCGACGAGCTCGCAAAGGCCGTCGAGCCCAGGAAGAAGGGCAACGTCAAGTATGCCTCCATATGTGCCATCCTGGCCTCCATGGCCTCTGTCATCCTTGGCTATGACATTGGGGTGATGAGTGGAGCGGCCATGTACATCAAGAAGGACCTGAATATCACGGACGTGCAGCTGGAGATCCTGATCGGGATCCTCAGTCTCTACTCGCTGTTCGGATCCTTCGCTGGCGCGCGGACGTCCGACAGGATCGGGCGCCGCTTGACCGTCGTGTTCGCCGCTGTCATCTTCTTCGTGGGCTCGTTGCTCATGGGTTTCGCCGTCAACTACGGCAT…
>Zm00001d021957
ATGGCCATGGTGCAGCCGGCGGACACGGCCGTCAAGGCCAACGAGATCCTGGCGCGGTTCCGGCCCATCGCGCCCAAGCCCACACTGGCAGCAGCCGCCGCCGCCGCCGCGGCGCCCGTGGCGCAGGCCGCGGCCGAGGGCGTCGTGGCCGCGAACCGCGTGCTGTGCCATCTGCAGAGCAGGCCGTGCCGCGCGCGCAAGCGCGGCCGCCCCACCGTCGTGCCGGTGTCGCCCAAGTCGGGCGCGCAGCCGCCCGCGAAGCGGAGGAGAGCCTCTACGCCGTACCCGCCTCTCCGGTGCGCGGCGGCGACCACGGGGGCGCATGTGTCCGCGGTCGTCCCAGGCAGTGCGCGTCTCCCACCGGCGAGTGCGGGTGTCGAAGACATCGCGAAGGCGGCG…
>Zm00001d021962
GTTTGCCCCTAAATTCTGTTTGCACGCAACAGTTAATCCGTGTTTGTTTCAGCGTTCTCCGGCAGCGGGTCATCTTTCGGCCAAGTAACGAGCCGTTCCGTGGTTCAGCCGAACGATATCCGAAGTCCAGACGGGGTAACGTGCGGCGTGCCAAAGACGAGGGAACGGCGGAACGCCCGCCACACGCTCCCCGAGCTCGGCGTCGCCCGGGCCACAATGGCGGCCCCATCCGCTTCCGCCCCGTTGCTCCGCTCCCACCCCCACCACGGCTCGCTCTTCCCCTCGTCACCGCGCCACCGTCCCGCGGCCGCTTCTCTGTCTGGGTTCCCGCCCCTCAGACCCGCCTCAGCCCGCAGGCTCCCATACACTGCGGTGCGGTCCTCCTCCACCGCCTCACCC…
>Zm00001d021971
ACGACACCCAACGGCAGCTGCAGCACAGCAGAGGAAGGCAGGAAGGAAGAAGATATCAGACCAGTGTGAAGCCAAGCCAGCGCGTCTCTCTCTCTCTCTCTCTGGTCGCTTGGTCGGTCCATCGGAGGATCAGCTCGGCGGTGGCCATGGCAATGGCGCAGCAAGCGAGCCTCCCCTGCTCGACTGCCACCACATGGAGAGAGCTCACGAACACGAGCTGGAGGGACGACGACTACAGGCGGATGGTGATGGCGTACCTGATCGAGGCGGTGTACCTGCTGGAGCTGGAGCGGCAGGAGCGCCGGGACGCGGCGGCGGTGGCGCAGCAGTGGTGGAAGCCGTTCCACTTCCGCCTGGCGCACGAGCTGGTGGACGACCGCGACGGCTCCGTGTTCGGCG…
>Zm00001d021977
ATGGAAGGTCTGATCCCGTTCGTGATCGACGTGATCAGGAGGAGCCACGGGCGCGGCGGCAGCGGCTACCGCTCCGTCTCGTCGGACGGCGGCAGCTCCCGCGGCGGGGGCAGCAGGCGCCACCTCATCGACTACTCGGAGCTGCCCGACGCCGCAGCCGCTTCCGCGGCGAGCGTCGGCGCCGCCGACTGGCCGCCGTCCGGCACGGTGCACCGCCGCGCGCGGTCGGAGTACGCGGACTCGACGGTCGTCGGGCGTCGCAGCGAGGAGCACGCCGGGCCGGCTTATCGCCGGAAATGA
>Zm00001d021981
[truncated: 323 more rows]
