# Supplementary material for: Comparative transcriptome analysis of differentially expressed genes related to the physiological changes of yellow-green leaf mutant of maize
Source: PeerJ. 2021 Feb 16;9:e10567. doi: 10.7717/peerj.10567 (PMC7894110; doi:10.7717/peerj.10567)
Supplement: Supplemental Information 11 [file peerj-09-10567-s011.xlsx]

## Sheet: Sheet1
	Sample name	The contents of chlorophyll a and chlorophyll b（mg/g）
		chlorophyll a	chlorophyll b
	Yellow-green leaf-1	0.511	0.19
	Yellow-green leaf-2	0.49	0.181
	Yellow-green leaf-3	0.487	0.185
	Normal-green leaf-1	0.79	0.26
	Normal-green leaf-2	0.781	0.255
	Normal-green leaf-3	0.778	0.246
	Sample name	Carotenoid monomers content（ug/mg）
		Neoxanthin	Violaxanthin	Capsanthin	Lutein	Zeaxanthin	b-Cryptoxanthin	a-Carotene	b-Carotene
	Yellow-green leaf-1	3.8766	22.3676	2.0943	344.896	0.3536	0.2127	1.147	102.775
	Yellow-green leaf-2	3.6658	20.2623	1.9143	325.822	0.3661	0.1959	1.0016	94.6179
	Yellow-green leaf-3	3.9015	22.5928	2.016	338.419	0.3964	0.2275	0.9707	97.6626
	Normal-green leaf-1	14.0846	36.9675	3.6418	992.884	1.9329	0.2006	6.6734	206.201
	Normal-green leaf-2	12.4352	34.5628	3.3279	951.922	1.5158	0.1618	6.2328	191.85
	Normal-green leaf-3	12.6311	34.3091	3.5678	940.843	1.6146	0.1979	6.005	186.159
	Sample name	Enzymes activities（U/g，FW)
		SS	GBSS	SSS	SPS	AGP
	Yellow-green leaf-1	480.895	163.921	196.575	902.626	31.1013
	Yellow-green leaf-2	482.518	161.314	197.936	903.433	29.8089
	Yellow-green leaf-3	480.123	159.591	198.664	893.796	32.1026
	Normal-green leaf-1	543.656	219.839	210.944	1647.83	50.1755
	Normal-green leaf-2	544.612	222.879	214.107	1654.17	51.3798
	Normal-green leaf-3	543.35	219.906	210.922	1650.69	49.6987
	Sample name	Sugar andstarch content（mg/g）
		Water-soluble total sugar	Total reducing sugar	Starch
	Yellow-green leaf-1	10.4028	1.56633	0.53
	Yellow-green leaf-2	10.6312	1.50629	0.54
	Yellow-green leaf-3	9.89912	1.48245	0.53
	Normal-green leaf-1	6.65475	1.49765	0.44
	Normal-green leaf-2	6.76684	1.51719	0.45
	Normal-green leaf-3	6.79053	1.48393	0.47
	Sample name	Chlorophyll a fluorescence parameters
		Fo	Fm	Fv/Fm	Y(II)	Y(NPQ)	Y(NO)	NPQ	qN	qP	qL	ETR
	Yellow-green leaf-1	0.106	0.515	0.794175	0.59	0.088	0.322	0.272	0.255	0.785	0.474	34.5
	Yellow-green leaf-2	0.115	0.613	0.812398	0.598	0.087	0.315	0.278	0.26	0.796	0.493	34.9
	Yellow-green leaf-3	0.118	0.525	0.775238	0.615	0.088	0.297	0.297	0.274	0.821	0.536	35.9
	Normal-green leaf-1	0.298	1.518	0.803689	0.5	0.166	0.334	0.497	0.391	0.683	0.366	42
	Normal-green leaf-2	0.284	1.442	0.803051	0.507	0.163	0.33	0.494	0.39	0.692	0.375	42.6
	Normal-green leaf-3	0.311	1.598	0.805382	0.512	0.163	0.325	0.501	0.394	0.7	0.385	43
	Sample name	Light response curves of net photosynthesis(μmol CO2 m-2 s-1)
		2000	1600	1200	800	400	200	100	50	0
	Yellow-green leaf-1	29.529	28.0458	25.719	20.0327	11.1658	4.6233	1.1603	-0.74815	-2.88452
	Yellow-green leaf-2	28.9876	28.1354	25.3123	20.5432	10.9534	5.1233	1.2359	-0.8561	-2.7933
	Yellow-green leaf-3	29.9641	27.9127	25.8841	19.8725	11.2255	4.3312	1.1211	-0.7032	-2.9897
	Normal-green leaf-1	31.368	29.963	26.9334	19.9069	10.2402	4.51065	1.03594	-0.53406	-4.41549
	Normal-green leaf-2	30.9861	29.0102	27.1245	20.3112	11.4536	4.4988	1.09865	-0.6212	-4.1248
	Normal-green leaf-3	31.8854	30.2564	26.7781	19.7564	9.8831	4.5225	1.0125	-0.5119	-4.4326
	Sample name	Validation of unigenes and DGE genes expression profiling
		Zm00001d000279	Zm00001d019479	Zm00001d024037	Zm00001d033446	Zm00001d009373	Zm00001d013013	Zm00001d002970	Zm00001d017418	Zm00001d015623
	Readcount_log2FoldChange YGLvsNGL	-8.0685	-3.1043	-3.3916	-4.704	-5.4732	-2.7795	-2.5243	5.1306	2.5178
	Relative transcript level-log2FoldChange YGLvsNGL	-8.45367	-6.31878	-5.35877	-8.41115	-8.53894	-2.48005	-5.28451	3.86813	1.82884
	Relative transcript level-log2FoldChange YGLvsNGL	-8.34562	-6.1254	-5.4862	-8.3865	-8.2546	-2.4215	-5.2482	3.9127	1.7964
	Relative transcript level-log2FoldChange YGLvsNGL	-8.55987	-6.3576	-5.2891	-8.4628	-8.6328	-42.4761	-5.3122	3.8433	1.8433
